# Supplementary material for: Transcriptome-wide identification and characterization of the Sox gene family and microsatellites for Corbicula fluminea
Source: PeerJ journal article supplement (doi:10.7717/peerj.7770), 2019-10-22
Supplement: Figure_S1.pdf [file Figure_S1.pdf]

|          |    |       |      |    |       |         |        |        |       |       |         |       |       |       |       |       |       |     |
|----------|----|-------|------|----|-------|---------|--------|--------|-------|-------|---------|-------|-------|-------|-------|-------|-------|-----|
| MysoxH   | GK | VKRPM | NAFM | VW | ARNYR | SRLSEEM | PQASNA | QISVRL | LGQIW | GSMP  | LADKEK  | YFRE  | EAER  | IKLQ  | HNRDF | PGW   | VYQPK | Q   |
| ObSox19a | GN | IKRPM | NAFM | VF | GRTYR | STLMKMF | PTASN  | SQIS   | IYLG  | EIWH  | KMSPA   | QKPY  | FDES  | NRIKY | KHRK  | DYPG  | WVYR  | PN  |
| Hssox30  | GH | VKRPM | NAFM | VW | ARIHR | PALAKAN | PAANNA | AEISV  | QLGLE | WNK   | LSEEQ   | KPY   | YDEA  | QKIKE | KHRE  | EPGW  | VYQPR | RP  |
| Drsox5   | PH | IKRPM | NAFM | VW | AKDER | RKILQAF | PDMHN  | SNISK  | ILGSR | WKSMT | NLEKQP  | YEEQA | RLSK  | QHLE  | KYPD  | YKYK  | PRP   |     |
| Hssox5   | PH | IKRPM | NAFM | VW | AKDER | RKILQAF | PDMHN  | SNISK  | ILGSR | WKAMT | NLEKQP  | YEEQA | RLSK  | QHLE  | KYPD  | YKYK  | PRP   |     |
| Drsox6   | PH | IKRPM | NAFM | VW | AKDER | RKILQAF | PDMHN  | SNISK  | ILGSR | WKSMT | NQEKQP  | YEEQA | RLSK  | IHL   | EKYP  | NYKY  | KPRP  |     |
| Hssox6   | PH | IKRPM | NAFM | VW | AKDER | RKILQAF | PDMHN  | SNISK  | ILGSR | WKSMS | NQEKQP  | YEEQA | RLSK  | IHL   | EKYP  | NYKY  | KPRP  |     |
| Drsox13  | GH | IKRPM | NAFM | VW | AKDER | RRILQAF | PDMHN  | SSISK  | ILGSR | WKSMS | NQEKQP  | YEEQA | RLSR  | QHLE  | RYPD  | YKYK  | PRP   |     |
| Hssox13  | SH | IKRPM | NAFM | VW | AKDER | RKILQAF | PDMHN  | SSISK  | ILGSR | WKSMT | NQEKQP  | YEEQA | RLSR  | QHLE  | KYPD  | YKYK  | PRP   |     |
| SpSoxD1  | PH | IKRPM | NAFM | VW | AKEER | RKILARH | PDMHN  | SNISK  | ILGSK | WKTMS | NAEKQP  | YEEQA | RLSK  | AHL   | EKYP  | YKYK  | PRP   |     |
| CfsoxD   | PH | VKRPM | NAFM | VW | AREER | RKILKAC | PDMHN  | SNISK  | ILGAK | WKAMT | NAEKQP  | YEEQS | RLSK  | LHME  | KHPD  | YRYR  | PRP   |     |
| Cgsox5   | PH | IKRPM | NAFM | VW | AREER | RKILKAC | PDMHN  | SNISK  | ILGAK | WKAMT | NAEKQP  | YEEQS | RLSK  | LHME  | KHPD  | YRYR  | PRP   |     |
| ObSox5   | PH | VKRPM | NAFM | VW | AREER | RKILKAC | PDMHN  | SNISK  | ILGAK | WKAMS | NAEKQP  | YEEQS | RLSK  | LHME  | KHPD  | YRYR  | PRP   |     |
| MysoxD   | PH | IKRPM | NAFM | VW | AREER | RKILKAC | PDMHN  | SNISK  | ILGAK | WKAMS | NAEKQP  | YEEQS | RLSK  | LHME  | KHPD  | YRYR  | PRP   |     |
| Drsox4a  | GH | IKRPM | NAFM | VW | SQIER | RKIMEQS | PDMHN  | AEISK  | RLGKR | WKL   | LKDS    | DKIP  | PIREA | ERLR  | LKHM  | ADYP  | YKYR  | PRK |
| Hssox4   | GH | IKRPM | NAFM | VW | SQIER | RKIMEQS | PDMHN  | AEISK  | RLGKR | WKL   | LKDS    | DKIP  | PIREA | ERLR  | LKHM  | ADYP  | YKYR  | PRK |
| Drsox4b  | GH | IKRPM | NAFM | VW | SQIER | RKIMEQS | PDMHN  | AEISK  | RLGKR | WKL   | LKD     | GDKIP | PIREA | ERLR  | LKHM  | ADYP  | YKYR  | PRK |
| Drsox11a | GH | IKRPM | NAFM | VW | SKIER | RKIMEQS | PDMHN  | AEISK  | RLGKR | WKM   | LKDS    | EKIP  | PIREA | ERLR  | LKHM  | ADYP  | YKYR  | PKK |
| Hssox11  | GH | IKRPM | NAFM | VW | SKIER | RKIMEQS | PDMHN  | AEISK  | RLGKR | WKM   | LKDS    | EKIP  | PIREA | ERLR  | LKHM  | ADYP  | YKYR  | PRK |
| Drsox11b | GH | IKRPM | NAFM | VW | SKIER | RKIMEQS | PDMHN  | AEISK  | RLGKR | WKM   | LKDS    | EKIP  | PIREA | ERLR  | LQHM  | ADYP  | YKYR  | PKK |
| Drsox12  | GH | IKRPM | NAFM | VW | SQIER | RKIMEQW | PDMHN  | AEISK  | RLGKR | WKL   | LPD     | YEKIP | PIKEA | ERLR  | LKHM  | ADYP  | YKYR  | PRK |
| Hssox12  | GH | IKRPM | NAFM | VW | SQHER | RKIMDQW | PDMHN  | AEISK  | RLGRR | WQL   | LQDS    | EKIP  | VREA  | ERLR  | LKHM  | ADYP  | YKYR  | PRK |
| Cgsox11  | NH | VKRPM | NAFM | VW | SQLE  | RKISEVS | PDMHN  | AEISK  | RLGKR | WKT   | LNET    | DRQP  | PIEEA | ERLR  | LHMQ  | EYPD  | YKYR  | PRK |
| MysoxC   | NH | VKRPM | NAFM | VW | SQIER | RRISEVS | PDMHN  | AEISK  | RLGKR | WKL   | LTE     | TERQP | PIEEA | ERLR  | LHMQ  | EYPD  | YKYR  | PRK |
| CfsoxC   | NH | VKRPM | NAFM | VW | SQIER | RKISEVA | PDMHN  | AEISK  | QLGAR | WKL   | LDEN    | DRQP  | PIEEA | ERLR  | LHMQ  | EYPD  | YKYR  | PRK |
| SpSox4   | GH | IKRPM | NAFM | VW | SQIER | RRIMET  | PDMHN  | AEISK  | RLGRR | WKT   | LDE     | VAKSP | VVEEA | ERLR  | LHMA  | QYPD  | YKYR  | PRK |
| Drsox3   | DR | VKRPM | NAFM | VW | SRGQR | RKMAQEN | PKMHN  | SEISK  | RLGAD | WKL   | LTD     | AEKRP | PIDEA | KRLRA | MHM   | KEHPD | YKYR  | PRR |
| Hssox3   | DR | VKRPM | NAFM | VW | SRGQR | RKMALEN | PKMHN  | SEISK  | RLGAD | WKL   | LTD     | AEKRP | PIDEA | KRLRA | VHM   | KEYPD | YKYR  | PRR |
| Drsox19b | DK | VKRPM | NAFM | VW | SRGQR | RKMAQEN | PKMHN  | SEISK  | RLGAE | WKL   | LTD     | VEKRP | PIDEA | KRLRA | VHM   | KEYPD | YKYK  | PRR |
| Drsox31  | DK | VKRPM | NAFM | VW | SRGQR | RKMAQEN | PKMHN  | SEISK  | RLGAE | WKL   | LTD     | VEKRP | PIDEA | KRLRA | VHM   | KEYPD | YKYK  | PRR |
| Drsox19a | DK | VKRPM | NAFM | VW | SRGQR | RKMAQEN | PKMHN  | SEISK  | RLGAE | WKL   | LTD     | AEKRP | PIDEA | KRLRA | LHM   | KEYPD | YKYK  | PRR |
| CfsoxB2  | DH | VKRPM | NAFM | VW | SRGQR | RKMAQEN | PKMHN  | SEISK  | RLGAD | WKL   | LTE     | EKRP  | PIDEA | KRLRA | LHM   | KEHPD | YKYR  | PRR |
| Drsox14  | DH | IKRPM | NAFM | VW | SRGQR | RKMAQEN | PKMHN  | SEISK  | RLGAE | WKL   | LSE     | SEKRP | PIDEA | KRLRA | QHM   | KEHPD | YKYR  | PRR |
| Hssox14  | DH | IKRPM | NAFM | VW | SRGQR | RKMAQEN | PKMHN  | SEISK  | RLGAE | WKL   | LSE     | AEKRP | PIDEA | KRLRA | QHM   | KEHPD | YKYR  | PRR |
| Drsox2   | DR | IKRPM | NAFM | VW | SRGQR | RKMAQEN | PKMHN  | SEISK  | RLGAE | WKL   | LSE     | SEKRP | PIDEA | KRLRA | LHM   | KEHPD | YKYR  | PRR |
| Drsox1a  | DR | VKRPM | NAFM | VW | SRGQR | RKMAQEN | PKMHN  | SEISK  | RLGAE | WKVMS | SEAEKRP | PIDEA | KRLRA | MHM   | KEHPD | YKYR  | PRR   |     |

|          |    |   |   |   |   |   |   |   |   |   |   |   |   |   |   |   |   |   |   |   |   |   |   |   |   |   |   |   |   |   |   |   |   |   |   |   |   |   |   |   |   |   |   |   |   |   |   |   |   |   |   |   |   |   |   |   |   |   |   |   |   |   |   |   |   |   |   |   |   |   |   |   |   |   |   |
|----------|----|---|---|---|---|---|---|---|---|---|---|---|---|---|---|---|---|---|---|---|---|---|---|---|---|---|---|---|---|---|---|---|---|---|---|---|---|---|---|---|---|---|---|---|---|---|---|---|---|---|---|---|---|---|---|---|---|---|---|---|---|---|---|---|---|---|---|---|---|---|---|---|---|---|---|
| Hssox1   | DR | V | K | R | P | M | N | A | F | M | V | W | S | R | G | Q | R | R | K | M | A | Q | E | N | P | K | M | H | N | S | E | I | S | K | R | L | G | A | E | W | K | V | M | S | E | A | E | K | R | P | F | I | D | E | A | K | R | L | R | A | L | H | M | K | E | H | P | D | Y | K | Y | R | P | R | R |
| Drsox1b  | DR | V | K | R | P | M | N | A | F | M | V | W | S | R | G | Q | R | R | K | M | A | Q | E | N | P | K | M | H | N | S | E | I | S | K | R | L | G | A | E | W | K | L | M | S | E | A | E | K | R | P | F | I | D | E | A | K | R | L | R | A | M | H | M | K | E | H | P | D | Y | K | Y | R | P | R | R |
| Cgsox2   | DR | V | K | R | P | M | N | A | F | M | V | W | S | R | G | Q | R | R | K | M | A | Q | E | N | P | K | M | H | N | S | E | I | S | K | R | L | G | A | E | W | K | L | L | S | E | A | E | K | R | P | F | I | D | E | A | K | R | L | R | A | I | H | M | K | E | H | P | D | Y | K | Y | R | P | R | R |
| ObSox2   | DR | V | K | R | P | M | N | A | F | M | V | W | S | R | G | Q | R | R | K | M | A | Q | E | N | P | K | M | H | N | S | E | I | S | K | R | L | G | A | E | W | K | L | L | S | E | S | E | K | R | P | F | I | D | E | A | K | R | L | R | A | I | H | M | K | E | H | P | D | Y | K | Y | R | P | R | R |
| CfsoxB1  | DR | V | K | R | P | M | N | A | F | M | V | W | S | R | G | Q | R | R | K | M | A | Q | E | N | P | K | M | H | N | S | E | I | S | K | R | L | G | A | E | W | K | L | L | S | E | T | E | K | R | P | F | I | D | E | A | K | R | L | R | A | I | H | M | K | E | H | P | D | Y | K | Y | R | P | R | R |
| MysoxB1  | DR | V | K | R | P | M | N | A | F | M | V | W | S | R | G | Q | R | R | K | M | A | Q | E | N | P | K | M | H | N | S | E | I | S | K | R | L | G | A | E | W | K | L | L | T | E | T | E | K | R | P | F | I | D | E | A | K | R | L | R | A | I | H | M | K | E | H | P | D | Y | K | Y | R | P | R | R |
| Hssox2   | DR | V | K | R | P | M | N | A | F | M | V | W | S | R | G | Q | R | R | K | M | A | Q | E | N | P | K | M | H | N | S | E | I | S | K | R | L | G | A | E | W | K | L | L | S | E | T | E | K | R | P | F | I | D | E | A | K | R | L | R | A | L | H | M | K | E | H | P | D | Y | K | Y | R | P | R | R |
| SpSoxB1  | DR | V | K | R | P | M | N | A | F | M | V | W | S | R | G | Q | R | R | K | L | S | Q | E | N | P | K | M | H | N | S | E | I | S | K | R | L | G | A | E | W | K | L | L | S | E | D | E | K | R | P | F | I | D | E | A | K | R | L | R | A | V | H | M | K | E | H | P | D | Y | K | Y | R | P | R | R |
| Cgsox14  | EH | V | K | R | P | M | N | A | F | M | V | W | S | R | G | Q | R | R | K | M | A | Q | D | N | P | K | M | H | N | S | E | I | S | K | R | L | G | A | E | W | K | L | L | S | E | E | D | K | R | P | F | I | D | E | A | K | R | L | R | A | L | H | M | K | E | H | P | D | Y | K | Y | R | P | R | R |
| MysoxB2  | DH | V | K | R | P | M | N | A | F | M | V | W | S | R | G | Q | R | R | K | M | A | Q | E | N | P | K | M | H | N | S | E | I | S | K | R | L | G | A | E | W | K | L | L | S | E | E | D | K | R | P | F | I | D | E | A | K | R | L | R | A | L | H | M | K | E | H | P | E | Y | K | Y | R | P | R | R |
| SpSoxB2  | DH | V | K | R | P | M | N | A | F | M | V | W | S | R | G | Q | R | R | K | L | A | Q | E | N | P | K | M | H | N | S | E | I | S | K | R | L | G | A | E | W | K | L | L | S | E | D | D | K | R | P | F | I | D | E | A | K | R | L | R | A | L | H | M | K | E | H | P | D | Y | K | Y | R | P | R | R |
| ObSox14  | EH | V | K | R | P | M | N | A | F | M | V | W | S | R | G | Q | R | R | K | M | A | Q | E | N | P | K | M | H | N | S | E | I | S | K | R | L | G | A | E | W | K | L | L | S | E | E | E | K | R | P | F | I | D | E | A | K | R | L | R | A | L | H | M | K | E | H | P | D | Y | K | Y | R | P | R | R |
| Drsox21b | DH | V | K | R | P | M | N | A | F | M | V | W | S | R | A | Q | R | R | K | M | A | Q | E | N | P | K | M | H | N | S | E | I | S | K | R | L | G | A | E | W | K | L | L | T | E | S | E | K | R | P | F | I | D | E | A | K | R | L | R | A | M | H | M | K | E | H | P | D | Y | K | Y | R | P | R | R |
| Hssox21  | DH | V | K | R | P | M | N | A | F | M | V | W | S | R | A | Q | R | R | K | M | A | Q | E | N | P | K | M | H | N | S | E | I | S | K | R | L | G | A | E | W | K | L | L | T | E | S | E | K | R | P | F | I | D | E | A | K | R | L | R | A | M | H | M | K | E | H | P | D | Y | K | Y | R | P | R | R |
| Drsox21a | DH | V | K | R | P | M | N | A | F | M | V | W | S | R | A | Q | R | R | K | M | A | L | D | N | P | K | M | H | N | S | E | I | S | K | R | L | G | G | E | W | K | L | L | S | D | S | E | K | R | P | F | I | D | E | A | K | R | L | R | A | V | H | M | K | E | H | P | D | Y | K | Y | R | P | R | R |
| Hssox15  | EK | V | K | R | P | M | N | A | F | M | V | W | S | S | A | Q | R | R | Q | M | A | Q | Q | N | P | K | M | H | N | S | E | I | S | K | R | L | G | A | Q | W | K | L | L | D | E | D | E | K | R | P | F | V | E | E | A | K | R | L | R | A | R | H | L | R | D | Y | P | D | Y | K | Y | R | P | R | R |
| Drsox7   | PR | I | R | R | P | M | N | A | F | M | V | W | A | K | D | E | R | K | R | L | A | V | Q | N | P | D | L | H | N | A | E | L | S | K | M | L | G | K | S | W | K | A | L | T | P | P | Q | K | R | P | Y | V | E | E | A | E | R | L | R | V | Q | H | M | Q | D | Y | P | N | Y | K | Y | R | P | R | R |
| Hssox7   | SR | I | R | R | P | M | N | A | F | M | V | W | A | K | D | E | R | K | R | L | A | V | Q | N | P | D | L | H | N | A | E | L | S | K | M | L | G | K | S | W | K | A | L | T | L | S | Q | K | R | P | Y | V | D | E | A | E | R | L | R | L | Q | H | M | Q | D | Y | P | N | Y | K | Y | R | P | R | R |
| Drsox17  | PR | I | R | R | P | M | N | A | F | M | V | W | A | K | D | E | R | K | R | L | A | Q | Q | N | P | D | L | H | N | A | E | L | S | K | M | L | G | K | S | W | K | A | L | P | M | V | D | K | R | P | F | V | E | E | A | E | R | L | R | V | K | H | M | Q | D | H | P | N | Y | K | Y | R | P | R | R |
| Hssox17  | SR | I | R | R | P | M | N | A | F | M | V | W | A | K | D | E | R | K | R | L | A | Q | Q | N | P | D | L | H | N | A | E | L | S | K | M | L | G | K | S | W | K | A | L | T | L | A | E | K | R | P | F | V | E | E | A | E | R | L | R | V | Q | H | M | Q | D | H | P | N | Y | K | Y | R | P | R | R |
| Drsox18  | SR | I | R | R | P | M | N | A | F | M | V | W | A | K | D | E | R | K | R | L | A | I | Q | N | P | D | L | H | N | A | V | L | S | K | M | L | G | Q | S | W | K | A | L | S | T | L | D | K | R | P | F | V | E | E | A | E | R | L | R | L | Q | H | L | Q | D | H | P | N | Y | K | Y | R | P | R | R |
| Hssox18  | SR | I | R | R | P | M | N | A | F | M | V | W | A | K | D | E | R | K | R | L | A | Q | Q | N | P | D | L | H | N | A | V | L | S | K | M | L | G | K | A | W | K | E | L | N | A | A | E | K | R | P | F | V | E | E | A | E | R | L | R | V | Q | H | L | R | D | H | P | N | Y | K | Y | R | P | R | R |
| SpSox17  | AR | I | R | R | P | M | N | A | F | M | V | W | A | K | D | E | R | K | R | L | A | D | Q | N | P | D | L | H | N | A | D | L | S | K | L | L | G | K | A | W | R | S | L | T | L | M | Q | K | Q | P | F | V | E | E | A | E | R | L | R | L | K | H | M | A | D | H | P | D | Y | K | Y | R | P | R | R |
| Drsox32  | TR | V | R | R | P | L | N | A | F | I | W | T | K | E | E | R | R | R | L | A | Q | L | N | P | D | L | E | N | T | D | L | S | K | I | L | G | K | T | W | K | A | M | S | L | A | D | K | R | P | Y | M | Q | E | A | E | R | L | R | I | Q | H | T | I | D | Y | P | N | Y | K | Y | R | P | R | R |   |
| CfsoxF   | HR | I | R | R | P | M | N | A | F | M | V | W | A | K | T | A | R | K | Q | L | A | E | E | N | P | D | V | H | N | A | E | L | S | K | M | L | G | T | N | W | K | N | L | P | A | E | K | K | K | Y | I | D | E | A | E | R | I | R | Q | D | H | M | K | Q | Y | P | D | Y | K | Y | R | P | R | R |   |
| Cgsox7   | ER | I | R | R | P | M | N | A | F | M | V | W | A | K | T | E | R | K | K | L | A | L | E | N | P | E | V | H | N | A | D | L | S | K | I | L | G | Q | K | W | R | E | L | S | P | S | Q | K | K | Y | S | E | A | D | K | L | R | D | L | H | M | Q | K | Y | P | D | Y | K | Y | R | P | R | R |   |   |
| MysoxF   | QR | I | R | R | P | M | N | A | F | M | V | W | A | R | T | E | R | K | R | L | A | H | E | N | P | D | V | H | N | A | D | L | S | K | I | L | G | K | K | W | K | S | L | P | T | E | E | K | K | I | F | I | D | E | A | E | R | L | R | V | R | H | M | Q | E | H | P | D | Y | K | Y | K | P | R | R |
| Drsox8b  | PH | V | K | R | P | M | N | A | F | M | V | W | A | Q | A | A | R | R | K | L | A | D | Q | Y | P | H | L | H | N | A | E | L | S | K | T | L | G | K | L | W | R | L | L | T | E | S | E | K | R | P | F | V | E | E | A | E | R | L | R | V | Q | H | K | K | D | H | P | D | Y | K | Y | Q | P | R | R |
| Hssox8   | PH | V | K | R | P | M | N | A | F | M | V | W | A | Q | A | A | R | R | K | L | A | D | Q | Y | P | H | L | H | N | A | E | L | S | K | T | L | G | K | L | W | R | L | L | S | E | S | E | K | R | P | F | V | E | E | A | E | R | L | R | V | Q | H | K | K | D | H | P | D | Y | K | Y | Q | P | R | R |
| Drsox9a  | PH | V | K | R | P | M | N | A | F | M | V | W | A | Q | A | A | R | R | K | L | A | D | Q | Y | P | H | L | H | N | A | E | L | S | K | T | L | G | K | L | W | R | L | L | N | E | V | E | K | R | P | F | V | E | E | A | E | R | L | R | V | Q | H | K | K | D | H | P | D | Y | K | Y | Q | P | R | R |
| Drsox9b  | PH | V | K | R | P | M | N | A | F | M | V | W | A | Q | A | A | R | R | K | L | A | D | Q | Y | P | H | L | H | N | A | E | L | S | K | T | L | G | K | L | W | R | L | L | N | E | G | E | K | R | P | F | V | E | E | A | E | R | L | R | V | Q | H | K | K | D | H | P | D | Y | K | Y | Q | P | R | R |
| Hssox9   | PH | V | K | R | P | M | N | A | F | M | V | W | A | Q |   |   |   |   |   |   |   |   |   |   |   |   |   |   |   |   |   |   |   |   |   |   |   |   |   |   |   |   |   |   |   |   |   |   |   |   |   |   |   |   |   |   |   |   |   |   |   |   |   |   |   |   |   |   |   |   |   |   |   |   |   |
