# Supplementary material for: Transcriptome-wide identification and characterization of the Sox gene family and microsatellites for Corbicula fluminea
Source: PeerJ. 2019 Oct 22;7:e7770. doi: 10.7717/peerj.7770 (PMC6814067; doi:10.7717/peerj.7770)
Supplement: Table S1 [file peerj-07-7770-s001.xlsx]

## Sheet: Sheet1
Table S1. Sox genes used for phylogenetic study in this study.
Species	Gene	Accession number
Danio rerio	Sox1a	NM_001002483
	Sox1b	BC154495
	Sox2	NM_213118
	Sox3	AB117960
	Sox4a	AY369081
	Sox4b	AY369082
	Sox5	NM_001033585
	Sox6	NM_001123009
	Sox7	NM_001080750
	Sox8a	XM_017358422
	Sox8b	NM_001025465
	Sox9a	NM_131643
	Sox9b	NM_131644
	Sox10	AF402677
	Sox11a	AJ237812
	Sox11b	AJ237813
	Sox12	NM_001030278
	Sox13	XR_662963
	Sox14	NM_001037680
	Sox17	NM_131287
	Sox18	XM_017353772
	Sox19a	NM_130908
	Sox19b	NM_131702
	Sox21a	BC056274
	Sox21b	NM_001009888
	Sox31	AJ404687
	Sox32	BC097087
Homo sapiens	Sox1	ENSP00000330218
	Sox2	ENSP00000323588
	Sox3	ENSP00000359567
	Sox4	ENSP00000244745
	Sox5	ENSP00000437487
	Sox6	ENSP00000379644
	Sox7	ENSP00000301921
	Sox8	ENSP00000293894
	Sox9	ENSP00000245479
	Sox10	ENSP00000354130
	Sox11	ENSP00000322568
	Sox12	ENSP00000347646
	Sox13	ENSP00000356172
	Sox14	ENSP00000305343
	Sox15	ENSP00000355354
	Sox17	ENSP00000297316
	Sox18	ENSP00000341815
	Sox21	ENSP00000366144
	Sox30	ENSP00000427984
Mizuhopecten yessoensis	SoxB1	KY523526
	SoxB2	KY523527
	SoxC	KY523528
	SoxD	KY523529
	SoxE	KY523530
	SoxF	KY523531
	SoxH	KY523532
Crassostrea gigas	Sox2	XM_011457360
	Sox5	XM_011427075
	Sox7	XM_011449772
	Sox8	NM_001308872
	Sox11	XM_011446901
	Sox14	XM_011435673
Octopus bimaculoides	Sox2	XM_014925285
	Sox5	XM_014915199
	Sox14	XM_014934485
	Sox19a	XM_014935479
Strongylocentrotus purpuratus	SoxB1	NM_214474
	SoxB2	NM_214473
	SoxD1	XM_011665480
	Sox4	XM_792991
	Sox10	XM_781716
	Sox17	XM_786890.4
