# Supplementary material for: Transcriptome-wide identification and characterization of the Sox gene family and microsatellites for Corbicula fluminea
Source: PeerJ. 2019 Oct 22;7:e7770. doi: 10.7717/peerj.7770 (PMC6814067; doi:10.7717/peerj.7770)
Supplement: Table S2 [file peerj-07-7770-s002.xlsx]

## Sheet: Sheet1
Table S2. Information of integrated function annotation of unigenes in Corbicula fluminea.
Unigene ID	COG_class	COG_class_annotation	GO_annotation	KEGG_annotation	KOG_class	KOG_class_annotation	Pfam_annotation	Swissprot_annotation	Nr_annotation
TR41548_c0_g1	[L]	Replication, recombination and repair	Molecular Function: nucleotide binding (GO:0000166);; Molecular Function: nucleic acid binding (GO:0003676);; Molecular Function: helicase activity (GO:0004386);; Biological Process: sexual reproduction (GO:0019953);; Molecular Function: ion binding (GO:0043167);; Cellular Component: intracellular organelle (GO:0043229);; Biological Process: cellular macromolecule metabolic process (GO:0044260);;…	--	[A]	RNA processing and modification	Helicase conserved C-terminal domain;; Tudor domain;; Helicase associated domain (HA2);; DEAD/DEAH box helicase	Probable ATP-dependent RNA helicase spindle-E GN=spn-E OS=Culex quinquefasciatus (Southern house mosquito) PE=3 SV=1	PREDICTED: putative ATP-dependent RNA helicase TDRD9 [Crassostrea gigas]
TR58044_c0_g1	--	--	--	--	[R]	General function prediction only	Reverse transcriptase (RNA-dependent DNA polymerase)	Endonuclease GN=pol OS=Drosophila melanogaster (Fruit fly) PE=3 SV=1	PREDICTED: uncharacterized protein LOC583642 [Strongylocentrotus purpuratus]
TR9819_c1_g1	--	--	--	--	[T]	Signal transduction mechanisms	Coagulation Factor Xa inhibitory site	Low-density lipoprotein receptor-related protein (Precursor) GN=lrp-1 OS=Caenorhabditis elegans PE=1 SV=1	PREDICTED: low-density lipoprotein receptor-related protein 6-like [Crassostrea gigas]
TR5267_c0_g2	--	--	--	--	[T]	Signal transduction mechanisms	EF-hand domain;; EF hand;; EF-hand domain pair	--	PREDICTED: uncharacterized protein LOC105317929 isoform X5 [Crassostrea gigas]
TR3637_c0_g1	--	--	--	--	--	--	--	--	hypothetical protein BRAFLDRAFT_67698 [Branchiostoma floridae]
TR30074_c0_g1	--	--	--	--	[S]	Function unknown	Mib_herc2;; von Willebrand factor type A domain;; von Willebrand factor type A domain	E3 ubiquitin-protein ligase mind-bomb GN=mib1 OS=Drosophila melanogaster (Fruit fly) PE=1 SV=3	PREDICTED: uncharacterized protein LOC105317183 isoform X2 [Crassostrea gigas]
TR54011_c0_g1	--	--	--	K12366|0.0|ame:412456|Ced-12	[T]	Signal transduction mechanisms	Domain of unknown function (DUF3361);; ELMO/CED-12 family;; Pleckstrin homology domain	Cell death abnormality protein 12 {ECO:0000303|PubMed:11703939} OS=Caenorhabditis elegans PE=1 SV=1	hypothetical protein LOTGIDRAFT_222972 [Lottia gigantea]
TR26837_c0_g1	--	--	Cellular Component: proteasome complex (GO:0000502);; Molecular Function: enzyme regulator activity (GO:0030234);; Biological Process: regulation of protein catabolic process (GO:0042176);; Biological Process: regulation of catalytic activity (GO:0050790);;	K03033|0.0|spu:578762|similar to PSMD3	[O]	Posttranslational modification, protein turnover, chaperones	Proteasome regulatory subunit C-terminal;; PCI domain	Probable 26S proteasome non-ATPase regulatory subunit 3 GN=Dox-A2 OS=Anopheles gambiae (African malaria mosquito) PE=3 SV=2	PREDICTED: 26S proteasome non-ATPase regulatory subunit 3-like isoform X2 [Aplysia californica]
TR14166_c0_g1	--	--	Cellular Component: extracellular region (GO:0005576);;	--	[T]	Signal transduction mechanisms	EGF-like domain;; Human growth factor-like EGF;; Calcium-binding EGF domain;; EGF-like domain	Fibropellin-1 (Precursor) GN=EGF1 OS=Strongylocentrotus purpuratus (Purple sea urchin) PE=1 SV=2	hypothetical protein TRIADDRAFT_21526 [Trichoplax adhaerens]
TR35883_c0_g1	--	--	--	--	--	--	--	--	Tripartite motif-containing protein 45 [Crassostrea gigas]
TR36071_c0_g1	--	--	Cellular Component: intracellular (GO:0005622);; Biological Process: metabolic process (GO:0008152);; Molecular Function: cysteine-type peptidase activity (GO:0008234);; Molecular Function: ion binding (GO:0043167);;	K08585|3e-65|tca:657371|similar to CG8107-PA	[OT]	--	Calpain family cysteine protease	Calpain-B catalytic subunit 2 OS=Drosophila melanogaster (Fruit fly) PE=1 SV=2	PREDICTED: calpain-9-like [Crassostrea gigas]
TR32076_c0_g1	--	--	--	--	--	--	--	--	PREDICTED: uncharacterized protein LOC105332801 [Crassostrea gigas]
TR42830_c0_g1	--	--	--	--	[S]	Function unknown	WD domain, G-beta repeat	77 kDa echinoderm microtubule-associated protein (Fragment) GN=EMAP OS=Lytechinus variegatus (Green sea urchin) PE=2 SV=1	hypothetical protein CAPTEDRAFT_219386 [Capitella teleta]
TR7515_c0_g1	--	--	--	--	--	--	--	--	PREDICTED: uncharacterized protein LOC105346119 isoform X2 [Crassostrea gigas]
TR46007_c0_g2	--	--	--	K04725|3e-20|aga:AgaP_AGAP007294|IAP1	[DR]	--	Inhibitor of Apoptosis domain	Apoptosis 1 inhibitor GN=th OS=Drosophila melanogaster (Fruit fly) PE=1 SV=2	Putative inhibitor of apoptosis [Crassostrea gigas]
TR20666_c0_g1	--	--	Cellular Component: mitochondrion (GO:0005739);; Biological Process: determination of adult lifespan (GO:0008340);;	--	[S]	Function unknown	Leucine Rich repeat;; Leucine Rich repeats (2 copies)	--	conserved hypothetical protein [Ixodes scapularis]
TR38236_c1_g1	--	--	--	--	[T]	Signal transduction mechanisms	Ligand-binding domain of nuclear hormone receptor	Nuclear hormone receptor E75 GN=E75 OS=Metapenaeus ensis (Greasyback shrimp) PE=2 SV=1	PREDICTED: retinoic acid receptor gamma-like isoform X2 [Crassostrea gigas]
TR6714_c0_g1	[R]	General function prediction only	--	--	[R]	General function prediction only	Metallo-beta-lactamase superfamily	Beta-lactamase-like protein 2 homolog GN=CG12375 OS=Drosophila melanogaster (Fruit fly) PE=2 SV=1	PREDICTED: beta-lactamase-like protein 2 [Crassostrea gigas]
TR31079_c1_g1	--	--	--	--	--	--	Mab-21 protein	--	PREDICTED: uncharacterized protein LOC105325402 [Crassostrea gigas]
TR35305_c5_g2	[G]	Carbohydrate transport and metabolism	Cellular Component: phosphopyruvate hydratase complex (GO:0000015);; Molecular Function: magnesium ion binding (GO:0000287);; Molecular Function: phosphopyruvate hydratase activity (GO:0004634);; Biological Process: glycolytic process (GO:0006096);;	K01689|0.0|nve:NEMVE_v1g229475|hypothetical protein	[G]	Carbohydrate transport and metabolism	Enolase, C-terminal TIM barrel domain;; Enolase, N-terminal domain;; Enolase C-terminal domain-like	Enolase OS=Doryteuthis pealeii (Longfin inshore squid) PE=2 SV=1	PREDICTED: enolase-like isoform X2 [Crassostrea gigas]
TR14181_c0_g1	--	--	Cellular Component: plasma membrane (GO:0005886);; Cellular Component: gap junction (GO:0005921);; Biological Process: ion transport (GO:0006811);; Cellular Component: integral component of membrane (GO:0016021);;	--	--	--	Innexin	Innexin-10 GN=inx-10 OS=Caenorhabditis elegans PE=3 SV=1	pannexin 3 [Aplysia californica]
TR22336_c0_g1	--	--	--	--	--	--	Guanylate-binding protein, C-terminal domain	--	--
TR26809_c1_g1	[O]	Posttranslational modification, protein turnover, chaperones	Biological Process: proteolysis (GO:0006508);; Molecular Function: cysteine-type peptidase activity (GO:0008234);; Molecular Function: thiol-dependent ubiquitinyl hydrolase activity (GO:0036459);; Biological Process: cellular protein metabolic process (GO:0044267);;	K11835|0.0|bfo:BRAFLDRAFT_131969|hypothetical protein	[O]	Posttranslational modification, protein turnover, chaperones	Ubiquitin carboxyl-terminal hydrolase;; Ubiquitin-like domain;; Ubiquitin carboxyl-terminal hydrolase;; DUSP domain;; Ubiquitin-specific protease C-terminal	Ubiquitin carboxyl-terminal hydrolase nonstop GN=not OS=Drosophila melanogaster (Fruit fly) PE=1 SV=3	PREDICTED: ubiquitin carboxyl-terminal hydrolase 15-like [Crassostrea gigas]
TR39283_c1_g1	--	--	--	--	--	--	--	--	PREDICTED: uncharacterized protein LOC105345905 [Crassostrea gigas]
TR54418_c0_g1	--	--	--	--	--	--	--	Uncharacterized histidine-rich protein DDB_G0274557 (Precursor) GN=DDB_G0274557 OS=Dictyostelium discoideum (Slime mold) PE=3 SV=1	PREDICTED: uncharacterized protein C8orf76 homolog [Crassostrea gigas]
TR32203_c1_g1	[F]	Nucleotide transport and metabolism	Cellular Component: extracellular region (GO:0005576);; Molecular Function: deaminase activity (GO:0019239);;	--	[F]	Nucleotide transport and metabolism	Adenosine/AMP deaminase	Adenosine deaminase AGSA (Precursor) OS=Aplysia californica (California sea hare) PE=1 SV=2	Adenosine deaminase CECR1 [Crassostrea gigas]
TR9368_c0_g2	[Z]	Cytoskeleton	Molecular Function: microtubule motor activity (GO:0003777);; Molecular Function: ATP binding (GO:0005524);; Cellular Component: kinesin complex (GO:0005871);; Cellular Component: microtubule (GO:0005874);; Biological Process: microtubule-based movement (GO:0007018);; Molecular Function: microtubule binding (GO:0008017);; Biological Process: metabolic process (GO:0008152);;	--	[Z]	Cytoskeleton	Kinesin motor domain;; Microtubule binding	Kinesin-related protein 8 GN=kif8 OS=Dictyostelium discoideum (Slime mold) PE=2 SV=1	PREDICTED: chromosome-associated kinesin KIF4A-like [Aplysia californica]
TR26918_c0_g1	[R]	General function prediction only	--	K09228|2e-71|mcc:711981|ZNF226	[R]	General function prediction only	Zinc finger, C2H2 type;; C2H2-type zinc finger;; Zinc-finger double domain;; C2H2-type zinc finger;; Zinc-finger of C2H2 type;; Zinc-finger double-stranded RNA-binding	Protein suppressor of hairy wing GN=su(Hw) OS=Drosophila ananassae (Fruit fly) PE=2 SV=1	hypothetical protein CGI_10016161 [Crassostrea gigas]
TR2127_c0_g1	--	--	--	--	[TV]	--	Sushi repeat (SCR repeat)	Protein lev-9 (Precursor) GN=lev-9 OS=Caenorhabditis elegans PE=1 SV=3	hypothetical protein LOTGIDRAFT_162881 [Lottia gigantea]
TR14436_c0_g1	--	--	Molecular Function: binding (GO:0005488);; Cellular Component: intracellular (GO:0005622);; Biological Process: cellular process (GO:0044763);;	--	[RP]	--	--	Muscle M-line assembly protein unc-89 GN=unc-89 OS=Caenorhabditis elegans PE=1 SV=3	PREDICTED: uncharacterized protein LOC105334355 isoform X6 [Crassostrea gigas]
TR40774_c0_g2	[O]	Posttranslational modification, protein turnover, chaperones	Molecular Function: glutathione transferase activity (GO:0004364);; Biological Process: metabolic process (GO:0008152);;	--	--	--	--	Maleylacetoacetate isomerase GN=mai OS=Dictyostelium discoideum (Slime mold) PE=3 SV=1	glutathione-s-transferase [Polymyxa betae]
TR35017_c0_g1	[J]	Translation, ribosomal structure and biogenesis	Cellular Component: intracellular ribonucleoprotein complex (GO:0030529);;	--	[J]	Translation, ribosomal structure and biogenesis	Ribosomal protein L22p/L17e	39S ribosomal protein L22, mitochondrial (Precursor) GN=mRpL22 OS=Drosophila pseudoobscura pseudoobscura (Fruit fly) PE=3 SV=2	PREDICTED: 39S ribosomal protein L22, mitochondrial-like [Aplysia californica]
TR48433_c0_g1	--	--	--	--	--	--	--	--	conserved Plasmodium protein, unknown function [Plasmodium reichenowi]
TR30941_c0_g1	--	--	--	--	--	--	--	--	PREDICTED: uncharacterized protein LOC105334049 [Crassostrea gigas]
TR15857_c0_g1	--	--	--	--	[T]	Signal transduction mechanisms	--	Cell death abnormality protein 1 {ECO:0000250|UniProtKB:Q9XWD6} (Precursor) OS=Caenorhabditis briggsae PE=3 SV=2	hypothetical protein LOTGIDRAFT_166436 [Lottia gigantea]
TR40450_c0_g1	--	--	--	--	--	--	Coiled-coil protein 142	--	hypothetical protein CGI_10012394 [Crassostrea gigas]
TR9445_c0_g1	--	--	--	--	--	--	--	Uncharacterized histidine-rich protein DDB_G0274557 (Precursor) GN=DDB_G0274557 OS=Dictyostelium discoideum (Slime mold) PE=3 SV=1	hypothetical protein EMH_0027260 [Eimeria mitis]
TR33126_c0_g1	--	--	Molecular Function: transferase activity (GO:0016740);;	--	[R]	General function prediction only	--	--	PREDICTED: palmitoyltransferase ZDHHC9-like isoform X9 [Crassostrea gigas]
TR15479_c1_g1	--	--	--	--	--	--	--	--	hypothetical protein LOTGIDRAFT_228425 [Lottia gigantea]
TR10665_c0_g1	--	--	--	--	[R]	General function prediction only	--	Putative uncharacterized protein DDB_G0268590 GN=DDB_G0268590 OS=Dictyostelium discoideum (Slime mold) PE=4 SV=2	PREDICTED: KAT8 regulatory NSL complex subunit 3-like isoform X2 [Crassostrea gigas]
TR50712_c0_g3	--	--	--	K05529|1e-27|bfo:BRAFLDRAFT_123269|hypothetical protein	--	--	Anp1	--	PREDICTED: mannan polymerase II complex anp1 subunit-like [Crassostrea gigas]
TR24286_c0_g1	--	--	Molecular Function: nucleotide binding (GO:0000166);; Molecular Function: metal ion binding (GO:0046872);;	--	--	--	--	--	PREDICTED: E3 ubiquitin-protein ligase RNF213-like isoform X2 [Crassostrea gigas]
TR31482_c0_g1	[J]	Translation, ribosomal structure and biogenesis	Cellular Component: exosome (RNase complex) (GO:0000178);; Molecular Function: RNA binding (GO:0003723);;	K07573|1e-77|dre:558857|exosc1	[J]	Translation, ribosomal structure and biogenesis	Exosome component EXOSC1/CSL4;; Exosome complex exonuclease RRP4 N-terminal region	--	3&apos;-5&apos; exoribonuclease CSL4-like protein, partial [Crassostrea gigas]
TR39278_c0_g1	--	--	Molecular Function: hydrolase activity (GO:0016787);;	K09644|1e-21|ptr:463116|LPA	--	--	Kringle domain	Zinc metalloproteinase nas-14 (Precursor) GN=nas-14 OS=Caenorhabditis elegans PE=2 SV=2	PREDICTED: uncharacterized protein LOC105329740 isoform X3 [Crassostrea gigas]
TR10524_c0_g1	--	--	--	--	--	--	Putative esterase;; Prolyl oligopeptidase family	--	hypothetical protein DAPPUDRAFT_225274 [Daphnia pulex]
TR56297_c0_g1	--	--	Molecular Function: transferase activity, transferring phosphorus-containing groups (GO:0016772);;	--	[T]	Signal transduction mechanisms	Fibronectin type III domain	Twitchin {ECO:0000303|PubMed:7190524} OS=Caenorhabditis elegans PE=1 SV=3	PREDICTED: titin [Strongylocentrotus purpuratus]
TR57347_c0_g2	--	--	--	--	--	--	Domain of unknown function (DUF5054)	--	PREDICTED: uncharacterized protein LOC105335891 [Crassostrea gigas]
TR5222_c0_g1	--	--	--	--	--	--	--	--	predicted protein [Nematostella vectensis]
TR10002_c0_g1	--	--	--	K08881|5e-12|dre:442869|trim24, tif1a, tifa, wu:fi24g04	[O]	Posttranslational modification, protein turnover, chaperones	B-box zinc finger	Protein wech GN=wech OS=Drosophila melanogaster (Fruit fly) PE=1 SV=2	Tripartite motif-containing protein 56 [Crassostrea gigas]
TR19004_c0_g1	--	--	--	--	[K]	Transcription	RNA polymerase II transcription factor SIII (Elongin) subunit A	Transcription elongation factor B polypeptide 3 GN=EloA OS=Drosophila melanogaster (Fruit fly) PE=1 SV=1	PREDICTED: transcription elongation factor B polypeptide 3-like [Crassostrea gigas]
TR53118_c0_g1	--	--	--	--	[T]	Signal transduction mechanisms	Calcium-binding EGF domain;; Complement Clr-like EGF-like;; EGF-like domain	Mucin-like protein {ECO:0000303|PubMed:23765379} (Fragment) OS=Acropora millepora (Staghorn coral) PE=1 SV=1	PREDICTED: uncharacterized protein LOC101857852 [Aplysia californica]
TR46741_c0_g1	--	--	--	--	--	--	--	Calponin homology domain-containing protein DDB_G0272472 GN=DDB_G0272472 OS=Dictyostelium discoideum (Slime mold) PE=3 SV=1	PREDICTED: coiled-coil domain-containing protein 81-like isoform X4 [Crassostrea gigas]
TR29433_c0_g1	--	--	--	--	--	--	YqaJ-like viral recombinase domain	--	PREDICTED: uncharacterized protein LOC105338587 [Crassostrea gigas]
TR9424_c0_g1	--	--	Molecular Function: metal ion binding (GO:0046872);;	--	[DR]	--	Zinc finger, C3HC4 type (RING finger);; Prokaryotic RING finger family 4	Apoptosis 2 inhibitor GN=Iap2 OS=Drosophila melanogaster (Fruit fly) PE=2 SV=3	PREDICTED: E3 ubiquitin-protein ligase XIAP-like [Crassostrea gigas]
TR33234_c0_g1	--	--	Biological Process: signal transduction (GO:0007165);;	K05702|7e-48|nve:NEMVE_v1g174672|hypothetical protein	[Z]	Cytoskeleton	DIL domain	--	Afadin [Crassostrea gigas]
TR23913_c0_g2	[D]	Cell cycle control, cell division, chromosome partitioning	--	--	--	--	--	Myosin-2 heavy chain GN=mhcA OS=Dictyostelium discoideum (Slime mold) PE=1 SV=3	viral A-type inclusion protein [Trichomonas vaginalis G3]
TR37822_c0_g1	--	--	--	--	--	--	Mab-21 protein	--	--
TR41388_c0_g1	[R]	General function prediction only	Molecular Function: metal ion binding (GO:0046872);;	--	[R]	General function prediction only	--	B lymphocyte-induced maturation protein 1 homolog {ECO:0000312|WormBase:F25D7.3a} OS=Caenorhabditis elegans PE=1 SV=1	hypothetical protein LOTGIDRAFT_133757 [Lottia gigantea]
TR27158_c0_g1	[D]	Cell cycle control, cell division, chromosome partitioning	Biological Process: cellular process (GO:0009987);;	--	[L]	Replication, recombination and repair	--	Probable inactive protein kinase DDB_G0270444 GN=DDB_G0270444 OS=Dictyostelium discoideum (Slime mold) PE=1 SV=1	Structural maintenance of chromosomes protein 6 [Crassostrea gigas]
TR19389_c0_g1	--	--	Cellular Component: signal peptidase complex (GO:0005787);; Biological Process: signal peptide processing (GO:0006465);; Molecular Function: peptidase activity (GO:0008233);; Cellular Component: integral component of membrane (GO:0016021);;	K12946|2e-37|bfo:BRAFLDRAFT_127523|hypothetical protein	[U]	Intracellular trafficking, secretion, and vesicular transport	Microsomal signal peptidase 12 kDa subunit (SPC12)	Signal peptidase complex subunit 1 GN=Spase12 OS=Drosophila melanogaster (Fruit fly) PE=1 SV=2	PREDICTED: signal peptidase complex subunit 1-like [Crassostrea gigas]
TR11881_c0_g1	--	--	--	--	--	--	B-box zinc finger	--	PREDICTED: transcription intermediary factor 1-alpha-like [Crassostrea gigas]
TR27174_c0_g1	--	--	--	--	--	--	LITAF-like zinc ribbon domain	Cell death-inducing p53-target protein 1 homolog GN=litaf OS=Dictyostelium discoideum (Slime mold) PE=3 SV=1	lipopolysaccharide-induced TNF-alpha factor [Meretrix meretrix]
TR25165_c1_g1	[TDBLU]	--	Molecular Function: 1-phosphatidylinositol 4-kinase activity (GO:0004430);; Biological Process: phosphatidylinositol biosynthetic process (GO:0006661);; Biological Process: phosphatidylinositol phosphorylation (GO:0046854);; Biological Process: phosphatidylinositol-mediated signaling (GO:0048015);;	K00888|0.0|tca:661577|fwd	[TU]	--	Phosphatidylinositol 3- and 4-kinase	Phosphatidylinositol 4-kinase GN=pikD OS=Dictyostelium discoideum (Slime mold) PE=3 SV=3	PREDICTED: phosphatidylinositol 4-kinase beta-like [Crassostrea gigas]
TR17554_c0_g1	--	--	--	K05401|9e-16|tgu:100232771|toll-like receptor 3	[T]	Signal transduction mechanisms	TIR domain;; Leucine rich repeat;; TIR domain	Probable serine/threonine-protein kinase DDB_G0278509 GN=DDB_G0278509 OS=Dictyostelium discoideum (Slime mold) PE=3 SV=1	toll-like receptor m [Mytilus galloprovincialis]
TR467_c0_g1	--	--	--	--	[T]	Signal transduction mechanisms	Mab-21 protein	--	PREDICTED: uncharacterized protein LOC100377009 [Saccoglossus kowalevskii]
TR48033_c3_g1	--	--	Molecular Function: binding (GO:0005488);;	K11314|1e-128|aml:100473298|TADA2A	[B]	Chromatin structure and dynamics	Myb-like DNA-binding domain;; SWIRM domain	Transcriptional adapter 2A OS=Drosophila melanogaster (Fruit fly) PE=1 SV=1	PREDICTED: transcriptional adapter 2-alpha-like [Crassostrea gigas]
TR28461_c0_g1	[R]	General function prediction only	--	--	[R]	General function prediction only	Zinc-finger double domain;; Zinc finger, C2H2 type;; C2H2-type zinc finger;; Zinc-finger double-stranded RNA-binding;; Zinc-finger of C2H2 type;; Drought induced 19 protein (Di19), zinc-binding;; GAGA factor	Protein bowel OS=Drosophila melanogaster (Fruit fly) PE=1 SV=1	Histone-lysine N-methyltransferase PRDM9, partial [Stegodyphus mimosarum]
TR48239_c0_g1	[V]	Defense mechanisms	Molecular Function: nucleotide binding (GO:0000166);; Biological Process: chloride transport (GO:0006821);; Biological Process: metabolic process (GO:0008152);; Cellular Component: membrane (GO:0016020);; Molecular Function: transferase activity, transferring phosphorus-containing groups (GO:0016772);; Molecular Function: ATPase activity (GO:0016887);; Molecular Function: transmembrane transporte…	--	[Q]	Secondary metabolites biosynthesis, transport and catabolism	ABC transporter;; ABC transporter transmembrane region	Probable multidrug resistance-associated protein lethal(2)03659 GN=l(2)03659 OS=Drosophila melanogaster (Fruit fly) PE=2 SV=3	PREDICTED: multidrug resistance-associated protein 4-like isoform X3 [Crassostrea gigas]
TR18553_c0_g1	[Z]	Cytoskeleton	--	K10361|3e-81|nvi:100124138|Myo15, NV10421	[N]	Cell motility	Myosin head (motor domain);; IQ calmodulin-binding motif	Unconventional myosin heavy chain 6 OS=Caenorhabditis elegans PE=1 SV=1	PREDICTED: unconventional myosin-XV-like isoform X1 [Crassostrea gigas]
TR32858_c1_g1	--	--	--	K14288|0.0|mmu:73192|Xpot, 1110004L07Rik, 3110065H13Rik, AI452076, C79645, EXPORTIN-T	[YUJ]	--	Exportin 1-like protein	Exportin-T GN=xpot OS=Dictyostelium discoideum (Slime mold) PE=3 SV=1	PREDICTED: exportin-T-like isoform X2 [Crassostrea gigas]
TR43688_c0_g1	--	--	--	--	[R]	General function prediction only	Immunoglobulin domain;; Immunoglobulin I-set domain;; Immunoglobulin domain;; Immunoglobulin domain;; Fibronectin type III domain	Protein turtle GN=tutl OS=Drosophila melanogaster (Fruit fly) PE=1 SV=2	hypothetical protein KGM_01134 [Danaus plexippus]
TR26052_c0_g1	--	--	Biological Process: ubiquitin-dependent protein catabolic process (GO:0006511);; Cellular Component: proteasome regulatory particle, base subcomplex (GO:0008540);;	K03029|1e-173|dre:415202|psmd4a, fj42d12, wu:fj42d12, zgc:86833	[O]	Posttranslational modification, protein turnover, chaperones	von Willebrand factor type A domain;; Ssl1-like;; Ubiquitin interaction motif;; von Willebrand factor type A domain	26S proteasome non-ATPase regulatory subunit 4 GN=Rpn10 OS=Drosophila melanogaster (Fruit fly) PE=1 SV=2	PREDICTED: 26S proteasome non-ATPase regulatory subunit 4-like [Crassostrea gigas]
TR3233_c0_g1	--	--	--	--	--	--	--	--	Baculoviral IAP repeat-containing protein 6 [Crassostrea gigas]
TR10979_c0_g1	--	--	--	--	--	--	--	--	hypothetical protein LOTGIDRAFT_177053, partial [Lottia gigantea]
TR36739_c0_g1	--	--	Molecular Function: DNA binding (GO:0003677);;	--	[K]	Transcription	N-terminal of Homeobox Meis and PKNOX1	Homeobox protein homothorax OS=Drosophila melanogaster (Fruit fly) PE=1 SV=1	Homeobox protein Meis1 [Crassostrea gigas]
TR52455_c0_g1	--	--	--	--	[O]	Posttranslational modification, protein turnover, chaperones	Hsp70 protein	--	PREDICTED: heat shock 70 kDa protein 12A-like [Crassostrea gigas]
TR30906_c0_g1	--	--	--	--	--	--	--	--	PREDICTED: uncharacterized protein LOC105347489 [Crassostrea gigas]
TR5383_c0_g1	--	--	Molecular Function: endopeptidase inhibitor activity (GO:0004866);; Cellular Component: extracellular space (GO:0005615);; Biological Process: negative regulation of endopeptidase activity (GO:0010951);;	K03989|3e-24|bfo:BRAFLDRAFT_129974|hypothetical protein	[O]	Posttranslational modification, protein turnover, chaperones	Alpha-2-macroglobulin family	--	complement component C3 [Ruditapes decussatus]
TR29541_c0_g1	--	--	--	--	[S]	Function unknown	Protein of unknown function (DUF1014)	Coiled-coil domain-containing protein 124 homolog GN=DDB_G0289893 OS=Dictyostelium discoideum (Slime mold) PE=3 SV=1	PREDICTED: coiled-coil domain-containing protein 124-like [Crassostrea gigas]
TR7154_c0_g1	--	--	--	--	--	--	Farnesoic acid 0-methyl transferase;; Lectin C-type domain	Perlucin OS=Haliotis laevigata (Abalone) PE=1 SV=3	PREDICTED: uncharacterized protein LOC105324988 [Crassostrea gigas]
TR55331_c0_g1	[I]	Lipid transport and metabolism	--	--	[R]	General function prediction only	Carboxylesterase family;; alpha/beta hydrolase fold;; Putative esterase	Acetylcholinesterase (Precursor) GN=Ace OS=Anopheles gambiae (African malaria mosquito) PE=3 SV=3	PREDICTED: acetylcholinesterase-like [Crassostrea gigas]
TR25545_c0_g1	--	--	--	--	--	--	--	--	hypothetical protein LOTGIDRAFT_157147 [Lottia gigantea]
TR28478_c0_g1	--	--	--	--	--	--	--	Histidine-rich glycoprotein (Precursor) OS=Plasmodium lophurae PE=4 SV=1	PREDICTED: histidine-rich glycoprotein-like [Musca domestica]
TR32393_c0_g1	--	--	Biological Process: cellular process (GO:0009987);;	K00921|2e-27|nvi:100122133|NV10729	[T]	Signal transduction mechanisms	--	Putative 1-phosphatidylinositol 3-phosphate 5-kinase GN=fab1 OS=Drosophila melanogaster (Fruit fly) PE=1 SV=2	PREDICTED: 1-phosphatidylinositol 3-phosphate 5-kinase-like [Aplysia californica]
TR8696_c0_g1	--	--	--	--	--	--	Beta-propeller repeat	--	hypothetical protein CGI_10018151 [Crassostrea gigas]
TR21329_c0_g1	--	--	Molecular Function: transcription factor activity, sequence-specific DNA binding (GO:0003700);; Cellular Component: nucleus (GO:0005634);; Biological Process: regulation of transcription, DNA-templated (GO:0006355);; Molecular Function: sequence-specific DNA binding (GO:0043565);;	K09441|1e-133|mdo:100012735|GABPA	[K]	Transcription	Ets-domain;; GA-binding protein alpha chain;; Sterile alpha motif (SAM)/Pointed domain	DNA-binding protein Ets97D GN=Ets97D OS=Drosophila melanogaster (Fruit fly) PE=1 SV=2	PREDICTED: GA-binding protein alpha chain-like, partial [Crassostrea gigas]
TR10359_c0_g1	--	--	--	--	--	--	Protein of unknown function (DUF1759)	--	PREDICTED: uncharacterized protein LOC105334976 [Crassostrea gigas]
TR33037_c0_g1	[L]	Replication, recombination and repair	--	--	[L]	Replication, recombination and repair	AAA domain	Protein shuttle craft GN=stc OS=Drosophila melanogaster (Fruit fly) PE=1 SV=2	PREDICTED: NFX1-type zinc finger-containing protein 1-like [Crassostrea gigas]
TR46208_c1_g2	[L]	Replication, recombination and repair	--	--	[R]	General function prediction only	Integrase core domain	Endonuclease GN=pol OS=Drosophila melanogaster (Fruit fly) PE=3 SV=1	PREDICTED: uncharacterized protein K02A2.6-like [Crassostrea gigas]
TR46212_c0_g2	[O]	Posttranslational modification, protein turnover, chaperones	Cellular Component: proteasome complex (GO:0000502);;	K03035|0.0|bfo:BRAFLDRAFT_113849|hypothetical protein	[O]	Posttranslational modification, protein turnover, chaperones	PCI domain	26S proteasome non-ATPase regulatory subunit 12 GN=psmD12 OS=Dictyostelium discoideum (Slime mold) PE=2 SV=1	PREDICTED: 26S proteasome non-ATPase regulatory subunit 12-like [Crassostrea gigas]
TR7114_c0_g1	[S]	Function unknown	Biological Process: nucleic acid metabolic process (GO:0090304);;	--	[R]	General function prediction only	NIF3 (NGG1p interacting factor 3)	Putative GTP cyclohydrolase 1 type 2 GN=nif3 OS=Dictyostelium discoideum (Slime mold) PE=2 SV=1	PREDICTED: putative GTP cyclohydrolase 1 type 2 NIF3L1 [Crassostrea gigas]
TR49592_c0_g1	--	--	--	--	[T]	Signal transduction mechanisms	Calcium-binding EGF domain;; EGF-like domain;; Complement Clr-like EGF-like	Fibulin-1 (Precursor) GN=fbl-1 OS=Caenorhabditis elegans PE=1 SV=3	PREDICTED: fibrillin-1 isoform X6 [Strongylocentrotus purpuratus]
TR11248_c0_g1	--	--	--	--	[T]	Signal transduction mechanisms	Low-density lipoprotein receptor domain class A;; Scavenger receptor cysteine-rich domain	Vitellogenin receptor {ECO:0000312|EMBL:AAP92450.1} (Precursor) OS=Solenopsis invicta (Red imported fire ant) PE=2 SV=1	PREDICTED: suppressor of tumorigenicity 14 protein-like isoform X3 [Crassostrea gigas]
TR52303_c2_g1	--	--	--	--	[U]	Intracellular trafficking, secretion, and vesicular transport	CNH domain	--	PREDICTED: vam6/Vps39-like protein-like isoform X2 [Aplysia californica]
TR9615_c0_g1	--	--	--	--	--	--	--	Papilin (Precursor) GN=Ppn OS=Drosophila melanogaster (Fruit fly) PE=1 SV=2	hypothetical protein EMH_0030190 [Eimeria mitis]
TR33899_c0_g2	--	--	--	--	--	--	C1q domain	Heavy metal-binding protein HIP OS=Mytilus edulis (Blue mussel) PE=1 SV=1	putative C1q domain containing protein MgC1q75 [Mytilus galloprovincialis]
TR4829_c0_g1	--	--	--	--	--	--	--	--	conserved hypothetical protein [Culex quinquefasciatus]
TR56754_c0_g1	--	--	--	--	--	--	Death domain	--	hypothetical protein LOTGIDRAFT_228817 [Lottia gigantea]
TR1034_c0_g2	--	--	--	--	[S]	Function unknown	FAM76 protein	Lateral signaling target protein 2 homolog GN=GJ23073 OS=Drosophila virilis (Fruit fly) PE=3 SV=1	PREDICTED: protein FAM76B-like isoform X2 [Crassostrea gigas]
TR45216_c0_g1	[I]	Lipid transport and metabolism	Biological Process: metabolic process (GO:0008152);; Molecular Function: transferase activity, transferring acyl groups (GO:0016746);;	K13506|1e-155|api:100168781|similar to CG3209 CG3209-PB	[I]	Lipid transport and metabolism	Acyltransferase	1-acylglycerophosphocholine O-acyltransferase 1 GN=CG32699 OS=Drosophila melanogaster (Fruit fly) PE=2 SV=1	PREDICTED: glycerol-3-phosphate acyltransferase 3-like [Crassostrea gigas]
TR7526_c0_g2	--	--	Biological Process: cellular process (GO:0044763);;	--	--	--	--	DNA ligase 1 GN=lig1 OS=Dictyostelium discoideum (Slime mold) PE=3 SV=1	Protein rogdi [Crassostrea gigas]
TR32683_c0_g1	--	--	Molecular Function: ATP binding (GO:0005524);; Biological Process: mitochondrial respiratory chain complex III assembly (GO:0034551);;	K08900|0.0|bfo:BRAFLDRAFT_122589|hypothetical protein	[O]	Posttranslational modification, protein turnover, chaperones	BCS1 N terminal;; ATPase family associated with various cellular activities (AAA)	Probable mitochondrial chaperone BCS1-B GN=bcsl1b OS=Dictyostelium discoideum (Slime mold) PE=3 SV=1	hypothetical protein LOTGIDRAFT_185574, partial [Lottia gigantea]
TR5802_c0_g1	--	--	--	--	--	--	--	--	PREDICTED: voltage-dependent T-type calcium channel subunit alpha-1I-like, partial [Aplysia californica]
TR299_c0_g1	[L]	Replication, recombination and repair	Molecular Function: transferase activity (GO:0016740);; Biological Process: cellular macromolecule metabolic process (GO:0044260);; Biological Process: nucleic acid metabolic process (GO:0090304);;	--	[R]	General function prediction only	Reverse transcriptase (RNA-dependent DNA polymerase)	Endonuclease GN=pol OS=Drosophila melanogaster (Fruit fly) PE=3 SV=1	PREDICTED: uncharacterized protein LOC105345235 [Crassostrea gigas]
TR31934_c0_g2	--	--	--	--	[AT]	--	--	Protein virilizer GN=vir OS=Drosophila melanogaster (Fruit fly) PE=1 SV=1	PREDICTED: protein virilizer homolog isoform X3 [Crassostrea gigas]
TR6156_c0_g1	[R]	General function prediction only	--	K09228|1e-30|mmu:22698|Zfp39, CTfin33, RP23-419P16.10, Zfp-39	[R]	General function prediction only	Zinc finger, C2H2 type;; C2H2-type zinc finger;; Zinc-finger double-stranded RNA-binding;; C2H2-type zinc finger;; Zinc-finger of C2H2 type	Protein suppressor of hairy wing GN=su(Hw) OS=Drosophila ananassae (Fruit fly) PE=2 SV=1	Zinc finger protein 271, partial [Stegodyphus mimosarum]
TR42575_c0_g1	--	--	--	--	--	--	--	Uncharacterized protein DDB_G0271670 (Precursor) GN=DDB_G0271670 OS=Dictyostelium discoideum (Slime mold) PE=3 SV=1	hypothetical protein CGI_10003798 [Crassostrea gigas]
TR26015_c0_g1	--	--	--	--	[O]	Posttranslational modification, protein turnover, chaperones	B-box zinc finger;; RING-type zinc-finger;; Zinc finger, C3HC4 type (RING finger)	General transcriptional corepressor trfA GN=trfA OS=Dictyostelium discoideum (Slime mold) PE=2 SV=1	PREDICTED: tripartite motif-containing protein 2-like [Crassostrea gigas]
TR29265_c3_g5	[O]	Posttranslational modification, protein turnover, chaperones	Molecular Function: glutathione peroxidase activity (GO:0004602);; Biological Process: response to oxidative stress (GO:0006979);; Biological Process: oxidation-reduction process (GO:0055114);;	K00432|9e-08|bfo:BRAFLDRAFT_114533|hypothetical protein	[O]	Posttranslational modification, protein turnover, chaperones	--	Glutathione peroxidase {ECO:0000303|PubMed:23567855} OS=Procambarus clarkii (Red swamp crayfish) PE=2 SV=1	selenium-dependent glutathione peroxidase [Meretrix meretrix]
TR57546_c0_g1	[R]	General function prediction only	--	--	[BK]	--	Macro domain	--	PREDICTED: poly [ADP-ribose] polymerase 14-like [Crassostrea gigas]
TR58682_c0_g1	--	--	--	--	[S]	Function unknown	Transmembrane protein 26	--	PREDICTED: transmembrane protein 26-like isoform X1 [Crassostrea gigas]
TR55130_c2_g1	--	--	--	--	--	--	Cadherin domain	Location of vulva defective 1 (Precursor) GN=lov-1 OS=Caenorhabditis elegans PE=1 SV=4	Cadherin-23 [Crassostrea gigas]
TR25507_c50_g36	[OC]	--	Biological Process: glycerol ether metabolic process (GO:0006662);; Molecular Function: protein disulfide oxidoreductase activity (GO:0015035);; Cellular Component: integral component of membrane (GO:0016021);; Biological Process: cell redox homeostasis (GO:0045454);; Biological Process: oxidation-reduction process (GO:0055114);;	K03671|5e-41|tgu:100225362|thioredoxin 2	[O]	Posttranslational modification, protein turnover, chaperones	Thioredoxin;; Thioredoxin-like domain	Probable thioredoxin-2 GN=trx-2 OS=Caenorhabditis elegans PE=3 SV=2	thioredoxin [Cyclina sinensis]
TR25239_c0_g1	--	--	--	--	[S]	Function unknown	N-terminal glutamine amidase	Protein N-terminal glutamine amidohydrolase GN=tun OS=Anopheles gambiae (African malaria mosquito) PE=3 SV=3	PREDICTED: protein N-terminal glutamine amidohydrolase-like [Crassostrea gigas]
TR23910_c0_g4	[S]	Function unknown	--	K07432|5e-54|bfo:BRAFLDRAFT_115464|hypothetical protein	[R]	General function prediction only	Glycosyltransferase family 28 C-terminal domain	--	hypothetical protein BRAFLDRAFT_115464 [Branchiostoma floridae]
TR55345_c0_g1	--	--	--	--	--	--	--	--	PREDICTED: cilia- and flagella-associated protein 46-like, partial [Crassostrea gigas]
TR22541_c0_g2	--	--	Cellular Component: food vacuole (GO:0020020);;	--	--	--	--	Histidine-rich glycoprotein (Precursor) OS=Plasmodium lophurae PE=4 SV=1	histidine-rich protein 3, partial [Plasmodium falciparum]
TR11706_c0_g1	--	--	--	--	--	--	NHL repeat	--	PREDICTED: E3 ubiquitin-protein ligase TRIM71-like [Crassostrea gigas]
TR43191_c0_g1	[D]	Cell cycle control, cell division, chromosome partitioning	Molecular Function: G-protein coupled receptor binding (GO:0001664);; Molecular Function: GTPase activity (GO:0003924);; Molecular Function: signal transducer activity (GO:0004871);; Molecular Function: ATP binding (GO:0005524);; Molecular Function: GTP binding (GO:0005525);; Cellular Component: cytosol (GO:0005829);; Biological Process: G-protein coupled receptor signaling pathway (GO:0007186);;…	--	[D]	Cell cycle control, cell division, chromosome partitioning	NUBPL iron-transfer P-loop NTPase;; CobQ/CobB/MinD/ParA nucleotide binding domain;; AAA domain;; ATPase MipZ;; Anion-transporting ATPase	Cytosolic Fe-S cluster assembly factor NUBP1 homolog {ECO:0000255|HAMAP-Rule:MF_03038} GN=v1g236650 OS=Nematostella vectensis (Starlet sea anemone) PE=3 SV=1	hypothetical protein LOTGIDRAFT_221654 [Lottia gigantea]
TR35183_c0_g1	--	--	Molecular Function: catalytic activity (GO:0003824);;	--	--	--	--	Temptin (Precursor) OS=Aplysia californica (California sea hare) PE=1 SV=1	PREDICTED: temptin-like [Crassostrea gigas]
TR22889_c0_g1	--	--	--	--	--	--	--	Myosin heavy chain, non-muscle GN=zip OS=Drosophila melanogaster (Fruit fly) PE=1 SV=2	PREDICTED: uncharacterized protein LOC105330625 isoform X4 [Crassostrea gigas]
TR36518_c1_g1	--	--	--	--	--	--	--	--	PREDICTED: hydrocephalus-inducing protein-like isoform X1 [Crassostrea gigas]
TR48556_c0_g1	--	--	--	--	--	--	--	--	hypothetical protein LOTGIDRAFT_232478 [Lottia gigantea]
TR23224_c0_g1	--	--	--	--	[Z]	Cytoskeleton	FHA domain	Interaptin GN=abpD OS=Dictyostelium discoideum (Slime mold) PE=1 SV=1	PREDICTED: sarcolemmal membrane-associated protein-like [Saccoglossus kowalevskii]
TR31852_c0_g1	--	--	Molecular Function: inositol 1,4,5-trisphosphate-sensitive calcium-release channel activity (GO:0005220);; Cellular Component: endoplasmic reticulum (GO:0005783);; Cellular Component: membrane (GO:0016020);; Biological Process: inositol phosphate-mediated signaling (GO:0048016);; Biological Process: calcium ion transmembrane transport (GO:0070588);;	--	--	--	--	Inositol 1,4,5-trisphosphate receptor GN=Itp-r83A OS=Drosophila melanogaster (Fruit fly) PE=2 SV=3	PREDICTED: inositol 1,4,5-trisphosphate receptor-like protein A [Crassostrea gigas]
TR34399_c0_g2	--	--	Molecular Function: protein dimerization activity (GO:0046983);;	K04453|3e-53|ame:551131|Max	[K]	Transcription	Helix-loop-helix DNA-binding domain	Protein max GN=Max OS=Drosophila melanogaster (Fruit fly) PE=1 SV=1	PREDICTED: protein max-like isoform X2 [Crassostrea gigas]
TR37604_c0_g1	--	--	--	K12373|1e-17|cin:100182564|similar to predicted protein	--	--	Putative carbohydrate binding domain	Putative beta-hexosaminidase (Precursor) OS=Pinctada maxima (Silver-lipped pearl oyster) PE=1 SV=1	hypothetical protein CAPTEDRAFT_225614 [Capitella teleta]
TR57684_c0_g1	--	--	--	--	--	--	--	--	PREDICTED: uncharacterized protein LOC105333801 [Crassostrea gigas]
TR12234_c1_g2	--	--	--	--	--	--	--	Putative leucine-rich repeat-containing protein DDB_G0290503 GN=DDB_G0290503 OS=Dictyostelium discoideum (Slime mold) PE=3 SV=1	PREDICTED: centriolin-like isoform X11 [Crassostrea gigas]
TR10644_c4_g1	[R]	General function prediction only	--	--	--	--	--	Putative uncharacterized protein DDB_G0293968 GN=DDB_G0293968 OS=Dictyostelium discoideum (Slime mold) PE=5 SV=1	hypothetical protein [Plasmodium vivax Sal-1]
TR37963_c0_g1	--	--	--	--	--	--	--	--	hypothetical protein NEMVEDRAFT_v1g152920 [Nematostella vectensis]
TR29786_c1_g1	--	--	Biological Process: cellular process (GO:0009987);;	K03174|1e-156|bfo:BRAFLDRAFT_237984|hypothetical protein	[T]	Signal transduction mechanisms	TRAF-type zinc finger;; Seven in absentia protein family;; Zinc finger, C3HC4 type (RING finger)	TNF receptor-associated factor family protein DDB_G0272340 GN=DDB_G0272340 OS=Dictyostelium discoideum (Slime mold) PE=3 SV=2	TNF receptor-associated factor 3 [Mytilus galloprovincialis]
TR45382_c0_g1	--	--	Molecular Function: RNA polymerase II transcription cofactor activity (GO:0001104);; Biological Process: regulation of transcription from RNA polymerase II promoter (GO:0006357);; Cellular Component: mediator complex (GO:0016592);;	K13528|2e-69|isc:IscW_ISCW021675|decarboxylase, putative	[K]	Transcription	TATA-binding related factor (TRF) of subunit 20 of Mediator complex	Mediator of RNA polymerase II transcription subunit 20 GN=MED20 OS=Anopheles gambiae (African malaria mosquito) PE=3 SV=6	PREDICTED: mediator of RNA polymerase II transcription subunit 20-like [Crassostrea gigas]
TR23496_c0_g1	[Q]	Secondary metabolites biosynthesis, transport and catabolism	Molecular Function: binding (GO:0005488);; Molecular Function: oxidoreductase activity (GO:0016491);;	K07425|1e-132|bta:511890|CYP4A11	[QI]	--	Cytochrome P450	Cytochrome P450 4d10 GN=Cyp4d10 OS=Drosophila mettleri (Fruit fly) PE=1 SV=1	PREDICTED: leukotriene-B(4) omega-hydroxylase 1-like [Saccoglossus kowalevskii]
TR23861_c1_g2	[L]	Replication, recombination and repair	Molecular Function: catalytic activity (GO:0003824);; Molecular Function: binding (GO:0005488);; Biological Process: cellular macromolecule metabolic process (GO:0044260);; Biological Process: nucleic acid metabolic process (GO:0090304);;	--	[R]	General function prediction only	Endonuclease-reverse transcriptase;; Endonuclease/Exonuclease/phosphatase family;; Reverse transcriptase (RNA-dependent DNA polymerase)	RNA-directed DNA polymerase from mobile element jockey GN=pol OS=Drosophila melanogaster (Fruit fly) PE=1 SV=1	pol-like protein [Biomphalaria glabrata]
TR7159_c0_g1	--	--	--	--	--	--	--	--	predicted protein [Nematostella vectensis]
TR23290_c0_g1	[R]	General function prediction only	Molecular Function: nucleic acid binding (GO:0003676);; Molecular Function: metal ion binding (GO:0046872);;	--	[R]	General function prediction only	C2H2-type zinc finger;; Zinc finger, C2H2 type	Zinc finger protein rotund GN=rn OS=Drosophila melanogaster (Fruit fly) PE=1 SV=2	PREDICTED: MDS1 and EVI1 complex locus protein EVI1-B-like isoform X1 [Crassostrea gigas]
TR25194_c0_g1	--	--	--	--	[C]	Energy production and conversion	Globin	Globin OS=Nerita albicilla (Ox-palate nerite) PE=1 SV=1	cytoglobin 2 isoform Ci1 [Cherax cainii]
TR44390_c0_g1	--	--	--	--	--	--	--	--	PREDICTED: zinc finger BED domain-containing protein 4-like [Amphimedon queenslandica]
TR42157_c0_g1	--	--	--	--	--	--	Lectin C-type domain	Perlucin-like protein {ECO:0000303|PubMed:21643827} (Precursor) OS=Mytilus galloprovincialis (Mediterranean mussel) PE=1 SV=1	perlucin-like protein isoform A [Ruditapes philippinarum]
TR38215_c0_g1	--	--	--	--	--	--	--	--	PREDICTED: uncharacterized protein LOC105322140 isoform X1 [Crassostrea gigas]
TR44585_c0_g1	--	--	Cellular Component: membrane (GO:0016020);;	--	[S]	Function unknown	Dimerisation domain of Ca+-activated chloride-channel, anoctamin	--	PREDICTED: anoctamin-4-like isoform X6 [Crassostrea gigas]
TR11067_c0_g1	[Z]	Cytoskeleton	Molecular Function: GTPase activity (GO:0003924);; Molecular Function: structural constituent of cytoskeleton (GO:0005200);; Molecular Function: GTP binding (GO:0005525);; Cellular Component: cytoplasm (GO:0005737);; Cellular Component: microtubule (GO:0005874);; Biological Process: microtubule-based process (GO:0007017);; Biological Process: metabolic process (GO:0008152);; Biological Process: p…	--	[Z]	Cytoskeleton	Tubulin C-terminal domain	Tubulin alpha chain (Fragment) OS=Lytechinus pictus (Painted sea urchin) PE=3 SV=1	hypothetical protein TRIADDRAFT_34826 [Trichoplax adhaerens]
TR32836_c5_g2	[G]	Carbohydrate transport and metabolism	Biological Process: cellular protein metabolic process (GO:0044267);;	--	[O]	Posttranslational modification, protein turnover, chaperones	--	46 kDa FK506-binding nuclear protein GN=FKBP46 OS=Spodoptera frugiperda (Fall armyworm) PE=2 SV=1	hypothetical protein CAPTEDRAFT_220209 [Capitella teleta]
TR3960_c0_g2	--	--	--	--	--	--	--	--	PREDICTED: uncharacterized protein LOC105328307 [Crassostrea gigas]
TR10029_c0_g1	--	--	--	--	--	--	--	--	PREDICTED: uncharacterized protein LOC105341978 [Crassostrea gigas]
TR19108_c0_g1	--	--	--	--	[S]	Function unknown	--	Zinc finger C2HC domain-containing protein T03G11.3 GN=T03G11.3 OS=Caenorhabditis elegans PE=3 SV=3	PREDICTED: uncharacterized protein LOC105330614 [Crassostrea gigas]
TR9902_c0_g2	--	--	--	--	--	--	--	--	hypothetical protein CGI_10011265 [Crassostrea gigas]
TR53107_c0_g1	--	--	Biological Process: metabolic process (GO:0008152);;	--	--	--	--	ATP synthase subunit a GN=ATP6 OS=Trypanosoma brucei brucei PE=2 SV=1	hypothetical protein LOTGIDRAFT_113701, partial [Lottia gigantea]
TR23923_c1_g1	--	--	Molecular Function: kinase activity (GO:0016301);;	--	--	--	Domain of unknown function (DUF4801)	Axoneme-associated protein mst101(2) GN=mst101(2) OS=Drosophila hydei (Fruit fly) PE=1 SV=1	PREDICTED: uncharacterized protein LOC105329708 isoform X2 [Crassostrea gigas]
TR48859_c0_g1	[D]	Cell cycle control, cell division, chromosome partitioning	--	--	--	--	--	Flagellar attachment zone protein 1 {ECO:0000250|UniProtKB:Q585H6} GN=TbgDal_IV3690 OS=Trypanosoma brucei gambiense (strain MHOM/CI/86/DAL972) PE=3 SV=1	PREDICTED: putative leucine-rich repeat-containing protein DDB_G0290503 [Megachile rotundata]
TR49063_c0_g1	--	--	--	K08509|1e-19|spu:584941|hypothetical LOC584941	[U]	Intracellular trafficking, secretion, and vesicular transport	--	--	hypothetical protein LOTGIDRAFT_172501 [Lottia gigantea]
TR13716_c0_g2	--	--	--	--	--	--	--	--	PREDICTED: uncharacterized protein K02A2.6-like [Crassostrea gigas]
TR34073_c0_g1	--	--	Molecular Function: receptor binding (GO:0005102);; Cellular Component: proteinaceous extracellular matrix (GO:0005578);; Biological Process: multicellular organism development (GO:0007275);; Biological Process: Wnt signaling pathway (GO:0016055);;	K00182|5e-68|tgu:100227493|wingless-type MMTV integration site family, member 2B	[T]	Signal transduction mechanisms	wnt family	Protein Wnt-2 (Precursor) GN=Wnt2 OS=Drosophila melanogaster (Fruit fly) PE=2 SV=2	hypothetical protein LOTGIDRAFT_139906, partial [Lottia gigantea]
TR38688_c0_g1	--	--	--	--	--	--	--	--	PREDICTED: uncharacterized protein LOC105337928 isoform X1 [Crassostrea gigas]
TR29588_c0_g1	--	--	--	--	[R]	General function prediction only	--	Probable RNA-directed DNA polymerase from transposon X-element GN=X-element\ORF2 OS=Drosophila melanogaster (Fruit fly) PE=3 SV=1	PREDICTED: uncharacterized protein LOC102810040 [Saccoglossus kowalevskii]
TR19751_c0_g1	--	--	Molecular Function: inositol 1,4,5-trisphosphate-sensitive calcium-release channel activity (GO:0005220);; Cellular Component: endoplasmic reticulum (GO:0005783);; Cellular Component: integral component of membrane (GO:0016021);; Biological Process: inositol phosphate-mediated signaling (GO:0048016);; Biological Process: calcium ion transmembrane transport (GO:0070588);;	--	[T]	Signal transduction mechanisms	RIH domain	Inositol 1,4,5-trisphosphate receptor-like protein A GN=iplA OS=Dictyostelium discoideum (Slime mold) PE=2 SV=1	PREDICTED: inositol 1,4,5-trisphosphate receptor type 3-like isoform X10 [Crassostrea gigas]
TR18953_c0_g1	[T]	Signal transduction mechanisms	--	--	--	--	Universal stress protein family	--	hypothetical protein LOTGIDRAFT_203658 [Lottia gigantea]
TR33463_c0_g2	[Z]	Cytoskeleton	--	K04437|1e-148|hmg:100204838|similar to predicted protein	[Z]	Cytoskeleton	Filamin/ABP280 repeat;; Calponin homology (CH) domain;; CAMSAP CH domain	Filamin-A GN=cher OS=Drosophila melanogaster (Fruit fly) PE=1 SV=2	PREDICTED: filamin-A-like [Crassostrea gigas]
TR48480_c0_g1	--	--	--	K06560|3e-09|mdo:100026773|similar to hCG1784522	[TV]	--	Lectin C-type domain	--	hypothetical protein BRAFLDRAFT_85664 [Branchiostoma floridae]
TR1504_c0_g1	--	--	Molecular Function: binding (GO:0005488);;	--	[T]	Signal transduction mechanisms	Calcium-binding EGF domain;; EGF-like domain;; EGF-like domain;; Human growth factor-like EGF;; EGF domain	Processed neurogenic locus Notch protein (Precursor) GN=N OS=Drosophila melanogaster (Fruit fly) PE=1 SV=3	PREDICTED: neurogenic locus notch homolog protein 1-like [Aplysia californica]
TR57926_c0_g1	--	--	--	--	--	--	--	--	hypothetical protein CGI_10026724 [Crassostrea gigas]
TR25177_c1_g1	--	--	--	--	--	--	SEA domain	Location of vulva defective 1 (Precursor) GN=lov-1 OS=Caenorhabditis elegans PE=1 SV=4	hypothetical protein BRAFLDRAFT_74157 [Branchiostoma floridae]
TR26964_c1_g1	--	--	--	--	--	--	--	Location of vulva defective 1 (Precursor) GN=lov-1 OS=Caenorhabditis elegans PE=1 SV=4	PREDICTED: von Willebrand factor D and EGF domain-containing protein-like [Crassostrea gigas]
TR51750_c0_g1	--	--	--	--	--	--	--	--	hypothetical protein BRAFLDRAFT_118038 [Branchiostoma floridae]
TR11473_c0_g1	[R]	General function prediction only	--	--	[S]	Function unknown	WD domain, G-beta repeat;; Anaphase-promoting complex subunit 4 WD40 domain	Gastrulation defective protein 1 homolog GN=CG5543 OS=Drosophila melanogaster (Fruit fly) PE=2 SV=1	PREDICTED: WD repeat-containing protein 70-like [Crassostrea gigas]
TR26975_c0_g2	--	--	Cellular Component: integral component of membrane (GO:0016021);; Biological Process: vesicle-mediated transport (GO:0016192);;	K08518|1e-147|mcc:701629|STXBP5	[U]	Intracellular trafficking, secretion, and vesicular transport	Lethal giant larvae(Lgl) like, C-terminal	Protein lethal(2) giant larvae GN=l(2)gl OS=Drosophila pseudoobscura pseudoobscura (Fruit fly) PE=1 SV=3	PREDICTED: syntaxin-binding protein 5-like isoform X4 [Crassostrea gigas]
TR30881_c0_g1	--	--	--	--	[R]	General function prediction only	Zinc-finger double-stranded RNA-binding;; Zinc-finger of C2H2 type	DNA ligase 1 GN=lig1 OS=Dictyostelium discoideum (Slime mold) PE=3 SV=1	hypothetical protein D910_04183 [Dendroctonus ponderosae]
TR45141_c0_g2	--	--	Molecular Function: hydrolase activity (GO:0016787);;	--	--	--	--	Uncharacterized protein F26C11.3 (Precursor) GN=F26C11.3 OS=Caenorhabditis elegans PE=3 SV=4	hypothetical protein PTSG_11305 [Salpingoeca rosetta]
TR13597_c0_g1	--	--	--	K12968|3e-36|bfo:BRAFLDRAFT_124903|hypothetical protein	[A]	RNA processing and modification	Adenosine-deaminase (editase) domain	Double-stranded RNA-specific editase Adar OS=Drosophila melanogaster (Fruit fly) PE=1 SV=2	PREDICTED: adenosine deaminase domain-containing protein 1-like [Crassostrea gigas]
TR28252_c0_g1	--	--	--	--	--	--	Protein kinase domain	--	--
TR9037_c5_g2	--	--	--	--	--	--	Double-stranded RNA binding motif	--	hypothetical protein CGI_10002360 [Crassostrea gigas]
TR50808_c0_g1	--	--	Molecular Function: DNA binding (GO:0003677);;	K09345|3e-46|bfo:BRAFLDRAFT_124258|nk homeobox 4	[K]	Transcription	Homeobox domain	Homeobox protein vnd GN=vnd OS=Drosophila melanogaster (Fruit fly) PE=1 SV=3	tinman [Euprymna scolopes]
TR20465_c0_g1	--	--	--	--	--	--	--	--	Protocadherin Fat 4 [Crassostrea gigas]
TR8021_c0_g1	--	--	--	--	--	--	--	--	PREDICTED: uncharacterized protein LOC105346950 isoform X1 [Crassostrea gigas]
TR30531_c0_g1	--	--	--	--	[UT]	--	--	--	hypothetical protein LOTGIDRAFT_91451, partial [Lottia gigantea]
TR26205_c0_g1	--	--	--	K08133|3e-13|dre:321298|col14a1, cb382, cb542, sb:cb382, sb:cb542	[W]	Extracellular structures	von Willebrand factor type A domain;; von Willebrand factor type A domain	--	PREDICTED: cysteine-rich, acidic integral membrane protein-like [Crassostrea gigas]
TR50395_c0_g1	--	--	Molecular Function: binding (GO:0005488);; Cellular Component: intracellular (GO:0005622);; Biological Process: cellular component organization (GO:0016043);; Biological Process: neuron development (GO:0048666);;	K11997|2e-12|spu:583781|hypothetical LOC583781	[O]	Posttranslational modification, protein turnover, chaperones	--	--	PREDICTED: protein PML-like [Crassostrea gigas]
TR23232_c0_g1	[H]	Coenzyme transport and metabolism	Molecular Function: catalytic activity (GO:0003824);; Cellular Component: intracellular (GO:0005622);; Biological Process: cellular protein modification process (GO:0006464);;	K10105|8e-62|nvi:100114744|NV15887	[H]	Coenzyme transport and metabolism	--	--	hypothetical protein LOTGIDRAFT_95116, partial [Lottia gigantea]
TR14301_c0_g1	--	--	Molecular Function: voltage-gated calcium channel activity (GO:0005245);; Cellular Component: voltage-gated calcium channel complex (GO:0005891);; Biological Process: regulation of ion transmembrane transport (GO:0034765);; Biological Process: calcium ion transmembrane transport (GO:0070588);;	K05315|1e-23|aag:AaeL_AAEL006849|voltage- gated calcium channel alpha subunit cav3.3 (voltage-dependent t-type calcium channel	[PT]	--	--	--	voltage-dependent T-type calcium channel alpha-1 subunit isoform D [Lymnaea stagnalis]
TR55935_c0_g4	--	--	--	--	--	--	--	--	PREDICTED: cytosolic Fe-S cluster assembly factor nubp1-B-like [Amphimedon queenslandica]
TR20304_c0_g1	--	--	Molecular Function: protein binding (GO:0005515);; Cellular Component: intracellular part (GO:0044424);;	--	--	--	--	--	PREDICTED: catenin alpha-like [Crassostrea gigas]
TR43771_c1_g1	[RTKL]	--	Molecular Function: kinase activity (GO:0016301);; Molecular Function: organic cyclic compound binding (GO:0097159);; Molecular Function: heterocyclic compound binding (GO:1901363);;	--	[T]	Signal transduction mechanisms	Protein kinase domain;; Protein tyrosine kinase;; P21-Rho-binding domain	Serine/threonine-protein kinase PAK mbt OS=Drosophila melanogaster (Fruit fly) PE=1 SV=2	PREDICTED: serine/threonine-protein kinase PAK mbt-like [Crassostrea gigas]
TR24847_c0_g1	--	--	--	--	--	--	--	--	hypothetical protein LOTGIDRAFT_163245 [Lottia gigantea]
TR21074_c0_g1	--	--	Molecular Function: catalytic activity (GO:0003824);; Molecular Function: binding (GO:0005488);; Biological Process: metabolic process (GO:0008152);;	--	[GO]	--	WSC domain	Xylosyltransferase oxt GN=oxt OS=Drosophila pseudoobscura pseudoobscura (Fruit fly) PE=2 SV=1	Putative fungistatic metabolite [Crassostrea gigas]
TR14198_c0_g2	--	--	--	--	--	--	Cor1/Xlr/Xmr conserved region	Claspin homolog GN=CG32251 OS=Drosophila melanogaster (Fruit fly) PE=1 SV=1	PREDICTED: dentin sialophosphoprotein-like [Saccoglossus kowalevskii]
TR20684_c0_g1	--	--	--	--	--	--	--	--	hypothetical protein LOTGIDRAFT_57544, partial [Lottia gigantea]
TR37307_c0_g2	--	--	Molecular Function: DNA binding (GO:0003677);; Molecular Function: transcription factor activity, sequence-specific DNA binding (GO:0003700);; Molecular Function: signal transducer activity (GO:0004871);; Cellular Component: nucleus (GO:0005634);; Cellular Component: transcription factor complex (GO:0005667);; Cellular Component: cytoplasm (GO:0005737);; Biological Process: regulation of transcri…	--	[K]	Transcription	Helix-loop-helix DNA-binding domain;; PAS fold;; PAS fold	Protein cycle GN=cyc OS=Drosophila melanogaster (Fruit fly) PE=1 SV=2	bmal [Platynereis dumerilii]
TR9751_c2_g1	--	--	Molecular Function: zinc ion binding (GO:0008270);;	--	[O]	Posttranslational modification, protein turnover, chaperones	WWE domain;; Zinc finger, C3HC4 type (RING finger);; Ring finger domain;; Zinc finger, C3HC4 type (RING finger)	Uncharacterized RING finger protein C02B8.6 GN=C02B8.6 OS=Caenorhabditis elegans PE=3 SV=2	PREDICTED: E3 ubiquitin-protein ligase rnf146-like [Crassostrea gigas]
TR30301_c0_g1	--	--	Molecular Function: ubiquitin-protein transferase activity (GO:0004842);; Molecular Function: zinc ion binding (GO:0008270);; Biological Process: protein ubiquitination (GO:0016567);; Molecular Function: ligase activity (GO:0016874);; Molecular Function: heme binding (GO:0020037);;	K10595|6e-36|bfo:BRAFLDRAFT_73255|hypothetical protein	[S]	Function unknown	--	Probable E3 ubiquitin-protein ligase HERC2 GN=HERC2 OS=Drosophila melanogaster (Fruit fly) PE=1 SV=3	PREDICTED: E3 ubiquitin-protein ligase HERC2-like [Crassostrea gigas]
TR46497_c1_g1	--	--	Biological Process: phosphate-containing compound metabolic process (GO:0006796);; Molecular Function: transferase activity, transferring phosphorus-containing groups (GO:0016772);;	--	[T]	Signal transduction mechanisms	--	Cell death abnormality protein 1 {ECO:0000250|UniProtKB:Q9XWD6} (Precursor) OS=Caenorhabditis briggsae PE=3 SV=2	PREDICTED: receptor-type tyrosine-protein phosphatase kappa-like [Crassostrea gigas]
TR33129_c0_g1	--	--	Biological Process: transport (GO:0006810);;	K04825|5e-13|spu:590960|similar to mec-10 degenerin	[PT]	--	Amiloride-sensitive sodium channel	FMRFamide-activated amiloride-sensitive sodium channel OS=Helix aspersa (Brown garden snail) PE=2 SV=1	PREDICTED: uncharacterized protein LOC105443034 [Strongylocentrotus purpuratus]
TR6026_c0_g1	--	--	--	--	--	--	--	--	PREDICTED: uncharacterized protein LOC105328275 [Crassostrea gigas]
TR47660_c0_g1	--	--	--	--	--	--	--	Uncharacterized histidine-rich protein DDB_G0274557 (Precursor) GN=DDB_G0274557 OS=Dictyostelium discoideum (Slime mold) PE=3 SV=1	hypothetical protein EMH_0059250 [Eimeria mitis]
TR40439_c0_g1	--	--	--	--	--	--	Protein of unknown function (DUF3522)	--	hypothetical protein CAPTEDRAFT_228167 [Capitella teleta]
TR17320_c5_g1	--	--	Cellular Component: intracellular part (GO:0044424);;	--	--	--	--	Uncharacterized protein PF11_0207 GN=PF11_0207 OS=Plasmodium falciparum (isolate 3D7) PE=4 SV=2	hypothetical protein CAPTEDRAFT_187467 [Capitella teleta]
TR9143_c0_g1	[R]	General function prediction only	--	--	[U]	Intracellular trafficking, secretion, and vesicular transport	Ras family;; Ras of Complex, Roc, domain of DAPkinase;; ADP-ribosylation factor family;; 50S ribosome-binding GTPase	Ras-related protein Rab-14 GN=rab14 OS=Dictyostelium discoideum (Slime mold) PE=1 SV=2	hypothetical protein BRAFLDRAFT_248199 [Branchiostoma floridae]
TR29482_c0_g1	--	--	Molecular Function: transferase activity (GO:0016740);;	--	[TV]	--	Sushi repeat (SCR repeat)	Limulus clotting factor C chain B (Precursor) OS=Tachypleus tridentatus (Japanese horseshoe crab) PE=1 SV=1	predicted protein [Nematostella vectensis]
TR40354_c0_g1	--	--	Biological Process: mRNA splicing, via spliceosome (GO:0000398);; Molecular Function: nucleic acid binding (GO:0003676);; Molecular Function: protein binding (GO:0005515);; Biological Process: mitotic G2 DNA damage checkpoint (GO:0007095);; Biological Process: neurogenesis (GO:0022008);; Cellular Component: precatalytic spliceosome (GO:0071011);; Cellular Component: catalytic step 2 spliceosome (…	K12890|2e-09|dwi:Dwil_GK13511|GK13511 gene product from transcript GK13511-RA	[A]	RNA processing and modification	--	Probable splicing factor, arginine/serine-rich 3 GN=rsp-3 OS=Caenorhabditis elegans PE=1 SV=2	GK13511 [Drosophila willistoni]
TR50351_c0_g1	--	--	--	--	--	--	--	--	hypothetical protein EAG_02458, partial [Camponotus floridanus]
TR54150_c0_g1	[EM]	--	--	K01639|3e-59|rno:304860|Npl	--	--	Dihydrodipicolinate synthetase family	--	PREDICTED: N-acetylneuraminate lyase-like [Crassostrea gigas]
TR31403_c0_g1	--	--	Biological Process: proteolysis (GO:0006508);; Molecular Function: cysteine-type peptidase activity (GO:0008234);;	--	[O]	Posttranslational modification, protein turnover, chaperones	Papain family cysteine protease	Cathepsin L light chain (Precursor) OS=Sarcophaga peregrina (Flesh fly) PE=1 SV=1	cathepsin L2 [Hyriopsis schlegelii]
TR50047_c0_g2	--	--	Molecular Function: binding (GO:0005488);; Molecular Function: hydrolase activity (GO:0016787);; Biological Process: organic substance metabolic process (GO:0071704);;	--	[GO]	--	GDSL-like Lipase/Acylhydrolase	Location of vulva defective 1 (Precursor) GN=lov-1 OS=Caenorhabditis elegans PE=1 SV=4	hypothetical protein [Monosiga brevicollis MX1]
TR14306_c0_g2	--	--	--	--	--	--	--	--	hypothetical protein CGI_10021656 [Crassostrea gigas]
TR6001_c0_g1	[K]	Transcription	Molecular Function: phosphoprotein phosphatase activity (GO:0004721);; Biological Process: dephosphorylation (GO:0016311);;	--	[K]	Transcription	NLI interacting factor-like phosphatase	CTD nuclear envelope phosphatase 1 homolog GN=Dd OS=Drosophila melanogaster (Fruit fly) PE=2 SV=1	PREDICTED: CTD nuclear envelope phosphatase 1-like isoform X1 [Crassostrea gigas]
TR26955_c0_g1	[U]	Intracellular trafficking, secretion, and vesicular transport	--	--	[U]	Intracellular trafficking, secretion, and vesicular transport	TLC domain	Ceramide synthase hyl-1 GN=hyl-1 OS=Caenorhabditis elegans PE=1 SV=1	PREDICTED: ceramide synthase 2-like [Aplysia californica]
TR25154_c0_g1	--	--	--	K11298|8e-55|isc:IscW_ISCW008318|sox4, putative	--	--	HMG (high mobility group) box;; HMG-box domain	Muscle M-line assembly protein unc-89 GN=unc-89 OS=Caenorhabditis elegans PE=1 SV=3	PREDICTED: HMG box-containing protein 4-like isoform X1 [Aplysia californica]
TR16157_c0_g1	[R]	General function prediction only	Molecular Function: transferase activity (GO:0016740);; Molecular Function: organic cyclic compound binding (GO:0097159);; Molecular Function: heterocyclic compound binding (GO:1901363);;	K11422|3e-51|isc:IscW_ISCW009293|hypothetical protein	--	--	RNA recognition motif. (a.k.a. RRM, RBD, or RNP domain)	Histone-lysine N-methyltransferase SETD1 {ECO:0000250|UniProtKB:Q9UPS6} OS=Drosophila melanogaster (Fruit fly) PE=1 SV=1	PREDICTED: histone-lysine N-methyltransferase SETD1B-A-like [Crassostrea gigas]
TR42345_c0_g2	--	--	--	K13963|9e-16|dvi:Dvir_GJ23351|GJ23351 gene product from transcript GJ23351-RA	[V]	Defense mechanisms	Serpin (serine protease inhibitor)	Serine protease inhibitor {ECO:0000312|EMBL:AAT35220.1} (Precursor) OS=Cyanea capillata (Lion&apos;s mane jellyfish) PE=1 SV=1	hypothetical protein LOTGIDRAFT_195168 [Lottia gigantea]
TR13380_c0_g1	--	--	--	--	--	--	--	--	PREDICTED: uncharacterized protein LOC105319558 [Crassostrea gigas]
TR4261_c0_g2	--	--	--	--	[K]	Transcription	--	Transcription factor SPT20 homolog GN=DDB_G0280065 OS=Dictyostelium discoideum (Slime mold) PE=3 SV=1	GI13678 [Drosophila mojavensis]
TR23935_c4_g5	--	--	--	--	--	--	--	--	hypothetical protein BRAFLDRAFT_117813 [Branchiostoma floridae]
TR41568_c1_g1	[F]	Nucleotide transport and metabolism	Molecular Function: magnesium ion binding (GO:0000287);; Molecular Function: adenylosuccinate synthase activity (GO:0004019);; Molecular Function: GTP binding (GO:0005525);; Cellular Component: cytoplasm (GO:0005737);; Biological Process: neurogenesis (GO:0022008);; Biological Process: 'de novo' AMP biosynthetic process (GO:0044208);;	K01939|0.0|bfo:BRAFLDRAFT_210543|hypothetical protein	[F]	Nucleotide transport and metabolism	Adenylosuccinate synthetase	Adenylosuccinate synthetase {ECO:0000255|HAMAP-Rule:MF_03125} GN=AdSS OS=Drosophila melanogaster (Fruit fly) PE=2 SV=1	PREDICTED: adenylosuccinate synthetase-like [Crassostrea gigas]
TR8961_c2_g3	--	--	--	--	--	--	--	--	hypothetical protein BRAFLDRAFT_93787 [Branchiostoma floridae]
TR27182_c0_g1	[K]	Transcription	--	--	[S]	Function unknown	--	Uncharacterized protein PFB0765w GN=PFB0765w OS=Plasmodium falciparum (isolate 3D7) PE=4 SV=1	hypothetical protein [Plasmodium berghei strain ANKA]
TR36044_c3_g1	[N]	Cell motility	Biological Process: vacuolar transport (GO:0007034);;	K12192|1e-77|isc:IscW_ISCW019894|vacuolar assembly/sorting protein DID4, putative	[U]	Intracellular trafficking, secretion, and vesicular transport	Snf7	Charged multivesicular body protein 2a homolog 2 GN=chmp2a2 OS=Dictyostelium discoideum (Slime mold) PE=3 SV=1	PREDICTED: charged multivesicular body protein 2b-like isoform X1 [Crassostrea gigas]
TR24397_c0_g2	--	--	--	--	--	--	--	--	Uromodulin [Crassostrea gigas]
TR16971_c0_g2	--	--	--	--	--	--	--	--	PREDICTED: uncharacterized protein LOC105333043 [Crassostrea gigas]
TR15530_c0_g1	--	--	--	--	--	--	--	Skeletal aspartic acid-rich protein 2 {ECO:0000303|PubMed:23765379} (Precursor; Fragment) OS=Acropora millepora (Staghorn coral) PE=1 SV=1	PREDICTED: uncharacterized protein LOC105338894 [Crassostrea gigas]
TR38791_c0_g1	--	--	--	--	--	--	DDE superfamily endonuclease;; Helix-turn-helix of DDE superfamily endonuclease;; THAP domain	--	PREDICTED: uncharacterized protein LOC100637207 [Amphimedon queenslandica]
TR44936_c0_g1	[R]	General function prediction only	Molecular Function: ubiquitin-protein transferase activity (GO:0004842);; Biological Process: protein ubiquitination (GO:0016567);; Molecular Function: ligase activity (GO:0016874);;	K09561|1e-118|dwi:Dwil_GK15258|GK15258 gene product from transcript GK15258-RA	[O]	Posttranslational modification, protein turnover, chaperones	U-box domain;; Tetratricopeptide repeat;; Tetratricopeptide repeat;; TPR repeat;; Anaphase-promoting complex, cyclosome, subunit 3;; Tetratricopeptide repeat;; Tetratricopeptide repeat;; Tetratricopeptide repeat;; Tetratricopeptide repeat	Protein STIP1 homolog GN=sti1 OS=Dictyostelium discoideum (Slime mold) PE=3 SV=1	PREDICTED: E3 ubiquitin-protein ligase CHIP-like [Crassostrea gigas]
TR16340_c0_g2	--	--	--	--	--	--	Ependymin	Ependymin-related protein 1 (Precursor) OS=Haliotis asinina (Donkey&apos;s ear abalone) PE=1 SV=1	hypothetical protein LOTGIDRAFT_154656 [Lottia gigantea]
TR10087_c0_g1	--	--	--	--	--	--	Caspase recruitment domain	--	--
TR32871_c2_g1	--	--	--	--	--	--	--	--	Alpha-2 adrenergic receptor [Crassostrea gigas]
TR42733_c0_g1	--	--	--	--	--	--	--	--	hypothetical protein CGI_10028433 [Crassostrea gigas]
TR48019_c0_g1	[G]	Carbohydrate transport and metabolism	--	K12373|9e-49|nve:NEMVE_v1g241973|hypothetical protein	--	--	Glycosyl hydrolase family 20, catalytic domain;; Chitobiase/beta-hexosaminidase C-terminal domain	Putative beta-hexosaminidase (Precursor) OS=Pinctada maxima (Silver-lipped pearl oyster) PE=1 SV=1	hypothetical protein LOTGIDRAFT_172759 [Lottia gigantea]
TR26386_c0_g1	--	--	Molecular Function: transcription factor activity, sequence-specific DNA binding (GO:0003700);; Cellular Component: nucleus (GO:0005634);; Biological Process: regulation of transcription, DNA-templated (GO:0006355);; Biological Process: multicellular organism development (GO:0007275);; Molecular Function: sequence-specific DNA binding (GO:0043565);;	K09340|2e-65|dre:170781|tlx2, MGC158207, Tlx-3a, hox11l, tlx3a, tlxA	[R]	General function prediction only	Homeobox domain	Homeobox protein ceh-9 GN=ceh-9 OS=Caenorhabditis elegans PE=3 SV=2	hypothetical protein LOTGIDRAFT_163574 [Lottia gigantea]
TR41391_c0_g1	--	--	--	--	[TV]	--	--	Histone-lysine N-methyltransferase, H3 lysine-79 specific {ECO:0000303|PubMed:21187070} OS=Dictyostelium discoideum (Slime mold) PE=2 SV=2	hypothetical protein M513_12902 [Trichuris suis]
TR11716_c0_g1	--	--	--	--	--	--	--	Location of vulva defective 1 (Precursor) GN=lov-1 OS=Caenorhabditis elegans PE=1 SV=4	predicted protein [Nematostella vectensis]
TR40933_c0_g1	--	--	--	--	[R]	General function prediction only	--	Fibrinogen-like protein A (Precursor) OS=Parastichopus parvimensis (Warty sea cucumber) PE=2 SV=1	predicted protein [Nematostella vectensis]
TR46719_c0_g1	[J]	Translation, ribosomal structure and biogenesis	Cellular Component: intracellular (GO:0005622);;	--	[J]	Translation, ribosomal structure and biogenesis	Ribosomal protein L36	--	hypothetical protein LOTGIDRAFT_136847 [Lottia gigantea]
TR39060_c0_g1	--	--	--	--	--	--	--	--	PREDICTED: NAD-dependent protein deacetylase Sirt6-like isoform X2 [Crassostrea gigas]
TR11476_c0_g1	--	--	--	--	[TV]	--	Sushi repeat (SCR repeat)	Protein lev-9 (Precursor) GN=lev-9 OS=Caenorhabditis elegans PE=1 SV=3	hypothetical protein LOTGIDRAFT_176276, partial [Lottia gigantea]
TR54863_c0_g2	[R]	General function prediction only	Molecular Function: arylformamidase activity (GO:0004061);; Biological Process: tryptophan catabolic process to kynurenine (GO:0019441);;	K07130|3e-17|nve:NEMVE_v1g239087|hypothetical protein	--	--	--	--	hypothetical protein CGI_10018741 [Crassostrea gigas]
TR41998_c0_g1	--	--	--	--	[TV]	--	Lectin C-type domain	Alpha-N-acetylgalactosamine-specific lectin {ECO:0000303|PubMed:11886841} (Precursor) OS=Patiria pectinifera (Starfish) PE=1 SV=1	ras-1 [Salpingoeca rosetta]
TR38977_c0_g1	--	--	--	--	--	--	Mitochondrial ATP synthase B chain precursor (ATP-synt_B)	--	--
TR16072_c0_g1	--	--	--	--	--	--	--	--	PREDICTED: poly [ADP-ribose] polymerase 15-like [Crassostrea gigas]
TR23757_c0_g1	[I]	Lipid transport and metabolism	--	--	--	--	Enoyl-CoA hydratase/isomerase;; Enoyl-CoA hydratase/isomerase;; Enoyl-CoA hydratase/isomerase;; Enoyl-CoA hydratase/isomerase	3-hydroxybutyryl-CoA dehydratase-like protein, mitochondrial (Precursor) GN=DDB_G0271866 OS=Dictyostelium discoideum (Slime mold) PE=3 SV=1	PREDICTED: enoyl-CoA delta isomerase 1, mitochondrial-like [Crassostrea gigas]
TR35515_c0_g1	--	--	--	--	--	--	--	--	hypothetical protein BRAFLDRAFT_105864 [Branchiostoma floridae]
TR55297_c0_g1	--	--	--	--	--	--	--	--	hypothetical protein LOTGIDRAFT_238549 [Lottia gigantea]
TR38782_c0_g1	--	--	Biological Process: macromolecule metabolic process (GO:0043170);;	--	[O]	Posttranslational modification, protein turnover, chaperones	Reprolysin (M12B) family zinc metalloprotease;; Metallo-peptidase family M12;; Metallo-peptidase family M12B Reprolysin-like;; Metallo-peptidase family M12B Reprolysin-like;; Metallo-peptidase family M12B Reprolysin-like	ADAM family mig-17 (Precursor) GN=mig-17 OS=Caenorhabditis elegans PE=1 SV=3	PREDICTED: ADAM family mig-17-like [Crassostrea gigas]
TR45886_c0_g1	--	--	--	--	[R]	General function prediction only	C2H2-type zinc finger	Probable serine/threonine-protein kinase DDB_G0277071 GN=DDB_G0277071 OS=Dictyostelium discoideum (Slime mold) PE=3 SV=1	hypothetical protein LOTGIDRAFT_165476 [Lottia gigantea]
TR22422_c0_g1	--	--	--	--	[L]	Replication, recombination and repair	--	Transposable element Hobo transposase GN=T OS=Drosophila melanogaster (Fruit fly) PE=3 SV=1	PREDICTED: zinc finger BED domain-containing protein 1-like [Crassostrea gigas]
TR31404_c0_g1	--	--	--	--	[T]	Signal transduction mechanisms	EGF-like domain;; Human growth factor-like EGF;; EGF-like domain	Processed neurogenic locus Notch protein (Precursor) GN=N OS=Drosophila melanogaster (Fruit fly) PE=1 SV=3	hypothetical protein LOTGIDRAFT_146735, partial [Lottia gigantea]
TR44880_c0_g3	--	--	--	--	--	--	--	--	hypothetical protein CGI_10011496 [Crassostrea gigas]
TR25356_c0_g1	--	--	--	K04725|5e-29|xtr:100127811|birc7, EIAP/XLX, XLX, kiap, livin, ml-iap, mliap, rnf50, xEIAP	[DR]	--	Zinc finger, C3HC4 type (RING finger);; Inhibitor of Apoptosis domain;; Prokaryotic RING finger family 4	Apoptosis 1 inhibitor GN=th OS=Drosophila melanogaster (Fruit fly) PE=1 SV=2	inhibitor of apoptosis protein [Crassostrea gigas]
TR54892_c0_g1	--	--	--	K12590|2e-78|bfo:BRAFLDRAFT_124523|hypothetical protein	[J]	Translation, ribosomal structure and biogenesis	3' exoribonuclease family, domain 1;; 3' exoribonuclease family, domain 2	Putative exosome complex component RRP41 GN=exos-4.1 OS=Caenorhabditis briggsae PE=3 SV=1	hypothetical protein LOTGIDRAFT_110121 [Lottia gigantea]
TR8688_c0_g1	--	--	Molecular Function: actin binding (GO:0003779);; Cellular Component: nuclear outer membrane (GO:0005640);; Cellular Component: actin filament (GO:0005884);; Biological Process: nucleus organization (GO:0006997);; Biological Process: actin filament organization (GO:0007015);; Biological Process: cytoplasmic transport, nurse cell to oocyte (GO:0007303);; Biological Process: skeletal muscle tissue d…	--	[Z]	Cytoskeleton	--	--	PREDICTED: nesprin-1-like [Crassostrea gigas]
TR37683_c0_g2	--	--	--	--	--	--	--	--	hypothetical protein NEMVEDRAFT_v1g148905 [Nematostella vectensis]
TR22788_c0_g1	--	--	--	--	--	--	--	--	hypothetical protein LOTGIDRAFT_236277 [Lottia gigantea]
TR55628_c0_g1	[IQR]	--	Biological Process: metabolic process (GO:0008152);;	K11169|1e-73|spu:589120|hypothetical LOC589120	[Q]	Secondary metabolites biosynthesis, transport and catabolism	short chain dehydrogenase;; Enoyl-(Acyl carrier protein) reductase;; KR domain	WW domain-containing oxidoreductase GN=Wwox OS=Drosophila melanogaster (Fruit fly) PE=2 SV=1	hypothetical protein LOTGIDRAFT_208859 [Lottia gigantea]
TR1373_c0_g1	--	--	--	--	--	--	--	--	Sacsin [Crassostrea gigas]
TR23216_c1_g1	--	--	--	--	--	--	--	Myb-like protein X GN=mybX OS=Dictyostelium discoideum (Slime mold) PE=3 SV=1	PREDICTED: breast cancer type 2 susceptibility protein homolog [Crassostrea gigas]
TR36047_c2_g1	--	--	--	--	[T]	Signal transduction mechanisms	Immunoglobulin domain;; Immunoglobulin I-set domain;; Immunoglobulin domain;; Immunoglobulin domain;; Immunoglobulin V-set domain;; CD80-like C2-set immunoglobulin domain	Neuroglian (Precursor) GN=Nrg OS=Drosophila melanogaster (Fruit fly) PE=1 SV=2	PREDICTED: neuroglian-like isoform X3 [Crassostrea gigas]
TR28520_c0_g1	--	--	Molecular Function: protein kinase activity (GO:0004672);; Molecular Function: binding (GO:0005488);; Biological Process: phosphorylation (GO:0016310);;	--	--	--	Kringle domain;; Lectin C-type domain;; F5/8 type C domain;; Farnesoic acid 0-methyl transferase	Tyrosine-protein kinase transmembrane receptor Ror2 (Precursor) GN=Nrk OS=Drosophila melanogaster (Fruit fly) PE=1 SV=2	hypothetical protein BRAFLDRAFT_85314 [Branchiostoma floridae]
TR43938_c0_g2	--	--	--	--	--	--	7 transmembrane receptor (rhodopsin family);; Serpentine type 7TM GPCR chemoreceptor Srw;; Serpentine type 7TM GPCR chemoreceptor Srx	Neuropeptides capa receptor GN=CapaR OS=Drosophila melanogaster (Fruit fly) PE=2 SV=3	MIP/allatostatin B receptor [Platynereis dumerilii]
TR45050_c0_g1	--	--	Molecular Function: RNA binding (GO:0003723);;	--	[J]	Translation, ribosomal structure and biogenesis	MA3 domain	--	Eukaryotic translation initiation factor 4 gamma 3 [Crassostrea gigas]
TR17496_c0_g1	--	--	--	--	--	--	--	Putative uncharacterized protein DDB_G0282133 GN=DDB_G0282133 OS=Dictyostelium discoideum (Slime mold) PE=4 SV=2	hypothetical protein YYC_05221 [Plasmodium yoelii 17X]
TR173_c0_g1	--	--	--	--	[T]	Signal transduction mechanisms	WSC domain;; EGF-like domain	Protein crumbs (Precursor) GN=crb OS=Drosophila melanogaster (Fruit fly) PE=1 SV=3	hypothetical protein HELRODRAFT_189468 [Helobdella robusta]
TR39117_c0_g1	--	--	Biological Process: signal transduction (GO:0007165);; Biological Process: metabolic process (GO:0008152);; Cellular Component: membrane (GO:0016020);; Molecular Function: signaling receptor activity (GO:0038023);;	--	--	--	AAA domain	--	hypothetical protein CAPTEDRAFT_170068 [Capitella teleta]
TR3035_c0_g1	[R]	General function prediction only	--	K05310|1e-173|xtr:100487165|pigg	[T]	Signal transduction mechanisms	Type I phosphodiesterase / nucleotide pyrophosphatase	--	PREDICTED: GPI ethanolamine phosphate transferase 2-like, partial [Saccoglossus kowalevskii]
TR54756_c0_g1	[R]	General function prediction only	Molecular Function: GTPase activity (GO:0003924);; Molecular Function: sphingomyelin phosphodiesterase activity (GO:0004767);; Molecular Function: GTP binding (GO:0005525);; Cellular Component: intracellular (GO:0005622);; Cellular Component: plasma membrane (GO:0005886);; Biological Process: intracellular protein transport (GO:0006886);; Biological Process: nucleocytoplasmic transport (GO:000691…	K07920|1e-103|isc:IscW_ISCW022146|RAB-33, putative (EC:3.1.4.12)	[TU]	--	Ras family;; Ras of Complex, Roc, domain of DAPkinase;; ADP-ribosylation factor family;; Gtr1/RagA G protein conserved region;; Elongation factor Tu GTP binding domain;; 50S ribosome-binding GTPase;; Signal recognition particle receptor beta subunit	Putative Ras-related protein Rab-33 GN=COS41.2 OS=Ciona intestinalis (Transparent sea squirt) PE=3 SV=1	Ras-related protein Rab-33B [Crassostrea gigas]
TR7800_c0_g1	--	--	--	--	--	--	--	--	PREDICTED: uncharacterized protein LOC101861687 isoform X4 [Aplysia californica]
TR27928_c0_g1	--	--	--	--	--	--	FHA domain	--	PREDICTED: centrosomal protein of 170 kDa protein B-like isoform X9 [Crassostrea gigas]
TR161_c0_g1	--	--	--	--	--	--	--	--	PREDICTED: A-kinase-interacting protein 1 [Strongylocentrotus purpuratus]
TR46218_c0_g1	--	--	Biological Process: metabolic process (GO:0008152);; Molecular Function: hydrolase activity (GO:0016787);;	--	[U]	Intracellular trafficking, secretion, and vesicular transport	Domain of unknown function (DUF4704)	Neurobeachin GN=rg OS=Drosophila melanogaster (Fruit fly) PE=1 SV=3	Neurobeachin [Crassostrea gigas]
TR37177_c0_g1	[U]	Intracellular trafficking, secretion, and vesicular transport	--	K09540|6e-39|nve:NEMVE_v1g88731|hypothetical protein	[O]	Posttranslational modification, protein turnover, chaperones	DnaJ domain	DnaJ homolog subfamily C member 11 homolog GN=dnajc11 OS=Dictyostelium discoideum (Slime mold) PE=3 SV=1	hypothetical protein LOTGIDRAFT_212166 [Lottia gigantea]
TR49003_c0_g1	--	--	Cellular Component: endoplasmic reticulum (GO:0005783);; Biological Process: metabolic process (GO:0008152);; Cellular Component: integral component of membrane (GO:0016021);; Molecular Function: transferase activity, transferring hexosyl groups (GO:0016758);;	K03845|1e-177|nve:NEMVE_v1g32894|hypothetical protein	[G]	Carbohydrate transport and metabolism	ALG3 protein	Probable Dol-P-Man:Man(5)GlcNAc(2)-PP-Dol alpha-1,3-mannosyltransferase GN=alg3 OS=Dictyostelium discoideum (Slime mold) PE=3 SV=1	PREDICTED: dol-P-Man:Man(5)GlcNAc(2)-PP-Dol alpha-1,3-mannosyltransferase-like [Crassostrea gigas]
TR6520_c0_g1	--	--	--	--	--	--	--	--	PREDICTED: uncharacterized protein LOC100367179 [Saccoglossus kowalevskii]
TR44719_c2_g1	--	--	--	K09654|2e-20|spu:588313|similar to MGC83081 protein	[G]	Carbohydrate transport and metabolism	--	--	PREDICTED: UDP-GalNAc:beta-1,3-N-acetylgalactosaminyltransferase 2 [Strongylocentrotus purpuratus]
TR32780_c0_g1	[QR]	--	Molecular Function: magnesium ion binding (GO:0000287);; Biological Process: metabolic process (GO:0008152);; Molecular Function: transferase activity (GO:0016740);; Molecular Function: lyase activity (GO:0016829);; Molecular Function: thiamine pyrophosphate binding (GO:0030976);;	--	[R]	General function prediction only	Methyltransferase domain;; Methyltransferase domain;; Methyltransferase domain;; Methyltransferase domain;; Methyltransferase domain;; ubiE/COQ5 methyltransferase family	Methyltransferase-like protein GN=metl OS=Drosophila melanogaster (Fruit fly) PE=1 SV=2	PREDICTED: methyltransferase-like protein 2 [Strongylocentrotus purpuratus]
TR19918_c0_g1	--	--	--	--	--	--	Promethin	--	hypothetical protein LOTGIDRAFT_235994 [Lottia gigantea]
TR18224_c0_g1	--	--	--	--	--	--	--	--	PREDICTED: uncharacterized protein LOC105344662 [Crassostrea gigas]
TR11684_c0_g1	--	--	--	--	--	--	--	--	PREDICTED: uncharacterized protein LOC105326331 [Crassostrea gigas]
TR16809_c1_g1	--	--	--	--	[W]	Extracellular structures	von Willebrand factor type A domain;; von Willebrand factor type A domain;; VWA domain containing CoxE-like protein	Transmembrane matrix receptor MUP-4 {ECO:0000312|EMBL:AAK69172.1} (Precursor) OS=Caenorhabditis elegans PE=1 SV=4	PREDICTED: uncharacterized protein LOC105329078 isoform X2 [Crassostrea gigas]
TR45136_c0_g2	--	--	--	--	--	--	C1q domain	--	sialic acid-binding lectin [Ruditapes philippinarum]
TR22716_c0_g1	--	--	--	--	--	--	--	--	hypothetical protein CGI_10001482 [Crassostrea gigas]
TR3256_c4_g1	--	--	--	--	--	--	--	--	PREDICTED: ciliogenesis-associated TTC17-interacting protein-like [Crassostrea gigas]
TR25906_c0_g1	--	--	Molecular Function: guanyl-nucleotide exchange factor activity (GO:0005085);; Biological Process: positive regulation of GTPase activity (GO:0043547);;	--	[T]	Signal transduction mechanisms	RasGEF domain;; PH domain	Ras guanine nucleotide exchange factor G GN=gefG OS=Dictyostelium discoideum (Slime mold) PE=2 SV=1	PREDICTED: ras-specific guanine nucleotide-releasing factor RalGPS1-like isoform X11 [Crassostrea gigas]
TR16148_c1_g1	[G]	Carbohydrate transport and metabolism	Biological Process: sphingolipid metabolic process (GO:0006665);; Cellular Component: membrane (GO:0016020);; Molecular Function: hydrolase activity, acting on glycosyl bonds (GO:0016798);;	--	[G]	Carbohydrate transport and metabolism	beta-glucosidase 2, glycosyl-hydrolase family 116 N-term	Non-lysosomal glucosylceramidase GN=CG33090 OS=Drosophila melanogaster (Fruit fly) PE=1 SV=1	PREDICTED: non-lysosomal glucosylceramidase-like [Aplysia californica]
TR9517_c0_g1	--	--	--	--	--	--	--	--	PREDICTED: vacuolar protein sorting-associated protein 13B-like [Saccoglossus kowalevskii]
TR5655_c0_g1	--	--	--	--	[R]	General function prediction only	--	--	PREDICTED: leucine-rich repeat and WD repeat-containing protein KIAA1239-like [Aplysia californica]
TR37089_c0_g1	--	--	--	--	[S]	Function unknown	zinc-finger of a C2HC-type	Zinc finger C2HC domain-containing protein CBG14627 GN=CBG14627 OS=Caenorhabditis briggsae PE=3 SV=2	PREDICTED: zinc finger C2HC domain-containing protein 1C-like [Crassostrea gigas]
TR23338_c0_g1	--	--	--	--	--	--	--	Putative uncharacterized protein DDB_G0294196 GN=DDB_G0294196 OS=Dictyostelium discoideum (Slime mold) PE=4 SV=1	Microfibrillar-associated protein 1, putative [Eimeria necatrix]
TR19961_c0_g1	--	--	--	--	--	--	--	--	PREDICTED: rap1 GTPase-GDP dissociation stimulator 1-B-like isoform X4 [Crassostrea gigas]
TR51095_c0_g1	[P]	Inorganic ion transport and metabolism	--	--	--	--	--	Probable zinc transporter protein DDB_G0282067 GN=DDB_G0282067 OS=Dictyostelium discoideum (Slime mold) PE=2 SV=1	PREDICTED: histidine-rich glycoprotein-like [Microplitis demolitor]
TR25451_c1_g1	--	--	--	K10345|1e-108|mcc:722489|SPSB3	[R]	General function prediction only	SPRY domain	Protein gustavus {ECO:0000312|EMBL:AAM68373.1} GN=gus OS=Drosophila melanogaster (Fruit fly) PE=1 SV=1	hypothetical protein LOTGIDRAFT_107918 [Lottia gigantea]
TR11671_c0_g1	--	--	Cellular Component: nucleus (GO:0005634);;	K12877|1e-100|hsa:55110|MAGOHB, FLJ10292, MGN2, mago, magoh	[A]	RNA processing and modification	Mago nashi protein	Protein mago nashi GN=mago OS=Drosophila melanogaster (Fruit fly) PE=1 SV=1	PREDICTED: protein mago nashi homolog 2 [Crassostrea gigas]
TR45970_c0_g1	[R]	General function prediction only	--	K10594|8e-63|ssc:100153537|HERC1	[S]	Function unknown	WD domain, G-beta repeat;; Anaphase-promoting complex subunit 4 WD40 domain	F-box-like/WD repeat-containing protein ebi GN=ebi OS=Drosophila melanogaster (Fruit fly) PE=1 SV=2	PREDICTED: probable E3 ubiquitin-protein ligase HERC1, partial [Crassostrea gigas]
TR15897_c0_g1	--	--	Biological Process: metabolic process (GO:0008152);; Cellular Component: membrane (GO:0016020);; Molecular Function: transferase activity (GO:0016740);;	--	[O]	Posttranslational modification, protein turnover, chaperones	--	Polypeptide N-acetylgalactosaminyltransferase 2 GN=pgant2 OS=Drosophila melanogaster (Fruit fly) PE=2 SV=2	PREDICTED: polypeptide N-acetylgalactosaminyltransferase 5-like [Aplysia californica]
TR52797_c0_g1	--	--	--	--	--	--	--	--	PREDICTED: E3 ubiquitin-protein ligase TRIM56-like [Crassostrea gigas]
TR33416_c0_g1	--	--	Biological Process: cellular process (GO:0009987);; Cellular Component: intracellular part (GO:0044424);;	K04677|4e-85|bfo:BRAFLDRAFT_67137|hypothetical protein	[TK]	--	MH2 domain;; MH1 domain	Dwarfin sma-3 GN=sma-3 OS=Caenorhabditis elegans PE=2 SV=1	hypothetical protein LOTGIDRAFT_145516 [Lottia gigantea]
TR42048_c0_g1	--	--	--	--	--	--	--	--	PREDICTED: uncharacterized protein LOC105317989 [Crassostrea gigas]
TR31963_c0_g2	--	--	--	--	--	--	--	Midasin GN=mdn1 OS=Dictyostelium discoideum (Slime mold) PE=3 SV=2	PREDICTED: uncharacterized protein LOC105344582 isoform X2 [Crassostrea gigas]
TR40353_c0_g1	--	--	Molecular Function: protein tyrosine phosphatase activity (GO:0004725);; Biological Process: peptidyl-tyrosine dephosphorylation (GO:0035335);;	--	[IU]	--	Myotubularin-like phosphatase domain;; GRAM domain	Myotubularin-related protein 3 GN=mtm-3 OS=Caenorhabditis elegans PE=1 SV=2	hypothetical protein LOTGIDRAFT_168891 [Lottia gigantea]
TR56720_c0_g2	--	--	--	--	--	--	Mitochondria-eating protein	Myosin-2 heavy chain GN=mhcA OS=Dictyostelium discoideum (Slime mold) PE=1 SV=3	PREDICTED: girdin-like isoform X9 [Crassostrea gigas]
TR41916_c0_g1	--	--	--	--	[M]	Cell wall/membrane/envelope biogenesis	--	Histone H3.v1 GN=H3v1 OS=Dictyostelium discoideum (Slime mold) PE=3 SV=1	predicted protein [Nematostella vectensis]
TR5268_c0_g1	--	--	Cellular Component: nucleus (GO:0005634);; Biological Process: regulation of transcription, DNA-templated (GO:0006355);;	K11341|1e-111|xtr:448430|yeats4, MGC89432	[K]	Transcription	YEATS family	--	PREDICTED: YEATS domain-containing protein 4-like [Crassostrea gigas]
TR19840_c0_g2	--	--	--	--	--	--	--	--	Inverted formin-2 [Crassostrea gigas]
TR10785_c1_g1	--	--	--	--	--	--	--	--	hypothetical protein LOTGIDRAFT_231496 [Lottia gigantea]
TR23938_c0_g1	--	--	--	--	--	--	--	DNA ligase 1 GN=lig1 OS=Dictyostelium discoideum (Slime mold) PE=3 SV=1	PREDICTED: tripartite motif-containing protein 2-like [Crassostrea gigas]
TR53279_c0_g1	--	--	Molecular Function: nucleotide binding (GO:0000166);; Molecular Function: transferase activity (GO:0016740);;	K11127|4e-57|bfo:BRAFLDRAFT_128562|hypothetical protein	[R]	General function prediction only	TROVE domain	Telomerase component p80 OS=Tetrahymena thermophila PE=1 SV=1	PREDICTED: telomerase protein component 1-like isoform X1 [Crassostrea gigas]
TR2575_c0_g3	--	--	Biological Process: dephosphorylation (GO:0016311);; Molecular Function: phosphatase activity (GO:0016791);;	--	[R]	General function prediction only	Acid Phosphatase;; Haloacid dehalogenase-like hydrolase	--	PREDICTED: magnesium-dependent phosphatase 1-like [Metaseiulus occidentalis]
TR31709_c1_g1	--	--	--	--	--	--	--	Location of vulva defective 1 (Precursor) GN=lov-1 OS=Caenorhabditis elegans PE=1 SV=4	hypothetical protein PTSG_12436 [Salpingoeca rosetta]
TR16818_c0_g1	--	--	Cellular Component: Golgi membrane (GO:0000139);; Biological Process: protein glycosylation (GO:0006486);; Cellular Component: integral component of membrane (GO:0016021);; Molecular Function: transferase activity, transferring glycosyl groups (GO:0016757);; Molecular Function: carbohydrate binding (GO:0030246);; Molecular Function: metal ion binding (GO:0046872);;	K00710|0.0|tca:663798|polypeptide GalNAc transferase 6-like	[O]	Posttranslational modification, protein turnover, chaperones	Glycosyl transferase family 2;; Ricin-type beta-trefoil lectin domain;; N-terminal domain of galactosyltransferase	Putative polypeptide N-acetylgalactosaminyltransferase 10 OS=Caenorhabditis briggsae PE=3 SV=2	PREDICTED: putative polypeptide N-acetylgalactosaminyltransferase 10 isoform X2 [Crassostrea gigas]
TR36535_c0_g1	--	--	Biological Process: metabolic process (GO:0008152);; Molecular Function: transferase activity (GO:0016740);;	K13667|4e-56|isc:IscW_ISCW013303|hypothetical protein	[R]	General function prediction only	Glycosyl transferase family 90	O-glucosyltransferase rumi homolog (Precursor) GN=AGAP004267 OS=Anopheles gambiae (African malaria mosquito) PE=3 SV=1	PREDICTED: protein O-glucosyltransferase 1-like [Crassostrea gigas]
TR56254_c0_g1	--	--	Cellular Component: membrane (GO:0016020);;	--	--	--	--	--	PREDICTED: uncharacterized protein LOC105328908 [Crassostrea gigas]
TR19671_c0_g1	--	--	Molecular Function: transferase activity (GO:0016740);;	K02577|2e-60|nvi:100120347|NV14587	[O]	Posttranslational modification, protein turnover, chaperones	heparan sulfate-N-deacetylase	Heparan sulfate N-sulfotransferase GN=sfl OS=Drosophila melanogaster (Fruit fly) PE=1 SV=1	PREDICTED: bifunctional heparan sulfate N-deacetylase/N-sulfotransferase 4-like [Crassostrea gigas]
TR42404_c0_g1	[R]	General function prediction only	--	--	[R]	General function prediction only	Mab-21 protein;; Ankyrin repeats (many copies);; Ankyrin repeats (many copies);; Ankyrin repeats (3 copies);; Ankyrin repeat;; Ankyrin repeat	Tankyrase OS=Drosophila melanogaster (Fruit fly) PE=1 SV=1	PREDICTED: uncharacterized protein LOC105342202 [Crassostrea gigas]
TR42320_c0_g1	--	--	Molecular Function: ion binding (GO:0043167);;	--	--	--	Thrombospondin type 3 repeat	Uncharacterized protein DDB_G0271670 (Precursor) GN=DDB_G0271670 OS=Dictyostelium discoideum (Slime mold) PE=3 SV=1	hypothetical protein HELRODRAFT_161577 [Helobdella robusta]
TR17839_c0_g1	[V]	Defense mechanisms	Molecular Function: nucleotide binding (GO:0000166);; Molecular Function: ATPase activity (GO:0016887);; Molecular Function: metal ion binding (GO:0046872);;	--	[Q]	Secondary metabolites biosynthesis, transport and catabolism	ABC-2 type transporter;; ABC transporter;; AAA domain, putative AbiEii toxin, Type IV TA system	ABC transporter G family member 1 GN=abcG1 OS=Dictyostelium discoideum (Slime mold) PE=3 SV=1	ABC transporter G family member 22 [Crassostrea gigas]
TR9014_c5_g2	--	--	Molecular Function: dioxygenase activity (GO:0051213);;	K10766|9e-94|bfo:BRAFLDRAFT_219277|hypothetical protein	[R]	General function prediction only	--	--	PREDICTED: alpha-ketoglutarate-dependent dioxygenase alkB homolog 4-like isoform X1 [Crassostrea gigas]
TR6705_c0_g1	--	--	Molecular Function: transmembrane receptor protein tyrosine kinase activity (GO:0004714);; Molecular Function: ATP binding (GO:0005524);; Biological Process: transmembrane receptor protein tyrosine kinase signaling pathway (GO:0007169);; Cellular Component: integral component of membrane (GO:0016021);; Biological Process: peptidyl-tyrosine phosphorylation (GO:0018108);;	K05088|3e-52|phu:Phum_PHUM599640|tyrosine-protein kinase, putative (EC:2.7.10.1)	[T]	Signal transduction mechanisms	Protein tyrosine kinase;; Protein kinase domain	Protein sevenless GN=sev OS=Drosophila melanogaster (Fruit fly) PE=1 SV=2	PREDICTED: proto-oncogene tyrosine-protein kinase ROS-like isoform X1 [Crassostrea gigas]
TR23753_c3_g1	--	--	--	--	--	--	DDE superfamily endonuclease;; helix-turn-helix, Psq domain;; DDE superfamily endonuclease	--	PREDICTED: uncharacterized protein LOC105326956 [Crassostrea gigas]
TR25507_c50_g14	[OC]	--	Biological Process: glycerol ether metabolic process (GO:0006662);; Molecular Function: protein disulfide oxidoreductase activity (GO:0015035);; Cellular Component: integral component of membrane (GO:0016021);; Biological Process: cell redox homeostasis (GO:0045454);; Biological Process: oxidation-reduction process (GO:0055114);;	K03671|6e-41|tgu:100225362|thioredoxin 2	[O]	Posttranslational modification, protein turnover, chaperones	Thioredoxin;; Thioredoxin-like domain	Probable thioredoxin-2 GN=trx-2 OS=Caenorhabditis elegans PE=3 SV=2	thioredoxin [Cyclina sinensis]
TR43848_c0_g1	--	--	--	--	[Z]	Cytoskeleton	--	--	hypothetical protein LOTGIDRAFT_237159 [Lottia gigantea]
TR23275_c1_g2	--	--	Molecular Function: catalytic activity (GO:0003824);;	--	[T]	Signal transduction mechanisms	--	Cell death abnormality protein 1 {ECO:0000250|UniProtKB:Q9XWD6} (Precursor) OS=Caenorhabditis briggsae PE=3 SV=2	Tenascin-X [Crassostrea gigas]
TR16922_c0_g1	--	--	--	--	--	--	Common central domain of tyrosinase	Putative tyrosinase-like protein tyr-3 (Precursor) GN=tyr-3 OS=Caenorhabditis elegans PE=3 SV=5	Tyrosinase domain containing protein [Trichuris trichiura]
TR45847_c0_g1	[Q]	Secondary metabolites biosynthesis, transport and catabolism	--	--	[Q]	Secondary metabolites biosynthesis, transport and catabolism	Cytochrome P450	Cytochrome P450 18a1 GN=Cyp18a1 OS=Drosophila melanogaster (Fruit fly) PE=2 SV=2	Cytochrome P450 2D14 [Crassostrea gigas]
TR34041_c0_g1	--	--	--	--	[T]	Signal transduction mechanisms	TIR domain;; TIR domain	Protein toll (Precursor) GN=Tl OS=Drosophila melanogaster (Fruit fly) PE=1 SV=1	toll-like receptor f precursor [Mytilus galloprovincialis]
TR48701_c0_g1	--	--	--	--	[T]	Signal transduction mechanisms	EGF-like domain;; Calcium-binding EGF domain;; Human growth factor-like EGF;; EGF domain;; Laminin G domain;; Laminin G domain;; EGF-like domain;; Laminin G domain;; Laminin G domain;; Concanavalin A-like lectin/glucanases superfamily	Fibropellin-1 (Precursor) GN=EGF1 OS=Strongylocentrotus purpuratus (Purple sea urchin) PE=1 SV=2	PREDICTED: protein crumbs-like isoform X1 [Crassostrea gigas]
TR39253_c0_g1	--	--	--	--	[T]	Signal transduction mechanisms	Immunoglobulin domain;; Immunoglobulin domain;; Immunoglobulin I-set domain;; Immunoglobulin domain;; Fibronectin type III domain;; Immunoglobulin V-set domain	Contactin (Precursor) GN=Cont OS=Drosophila melanogaster (Fruit fly) PE=1 SV=2	PREDICTED: contactin-like [Crassostrea gigas]
TR54021_c7_g1	--	--	--	--	[O]	Posttranslational modification, protein turnover, chaperones	--	Putative uncharacterized protein DDB_G0287191 GN=DDB_G0287191 OS=Dictyostelium discoideum (Slime mold) PE=4 SV=1	hypothetical protein NEMVEDRAFT_v1g7830 [Nematostella vectensis]
TR46949_c0_g1	[J]	Translation, ribosomal structure and biogenesis	Cellular Component: intracellular (GO:0005622);;	--	[J]	Translation, ribosomal structure and biogenesis	Ribosomal protein L17	--	PREDICTED: 39S ribosomal protein L17, mitochondrial-like [Aplysia californica]
TR2684_c0_g1	--	--	Biological Process: metabolic process (GO:0008152);; Molecular Function: acetylglucosaminyltransferase activity (GO:0008375);; Cellular Component: membrane (GO:0016020);;	K00727|1e-38|xla:380501|gcnt1, MGC52826	[G]	Carbohydrate transport and metabolism	Core-2/I-Branching enzyme	Xylosyltransferase oxt GN=oxt OS=Drosophila pseudoobscura pseudoobscura (Fruit fly) PE=2 SV=1	hypothetical protein LOTGIDRAFT_108047 [Lottia gigantea]
TR7940_c0_g1	--	--	Molecular Function: hydrolase activity (GO:0016787);;	K07817|1e-06|mmu:19276|Ptprn2, 4930425H11Rik, IA2beta, KIAA0387, PTP-NP, Phol, mKIAA0387, phogrin	[T]	Signal transduction mechanisms	--	--	PREDICTED: receptor-type tyrosine-protein phosphatase N2-like [Crassostrea gigas]
TR9775_c0_g1	--	--	Biological Process: protein polyglutamylation (GO:0018095);;	--	[O]	Posttranslational modification, protein turnover, chaperones	Tubulin-tyrosine ligase family	Tubulin polyglutamylase ttll-4 GN=ttll-4 OS=Caenorhabditis briggsae PE=3 SV=1	PREDICTED: tubulin polyglutamylase TTLL4-like isoform X1 [Crassostrea gigas]
TR36158_c2_g1	--	--	--	--	--	--	GIY-YIG catalytic domain	--	PREDICTED: uncharacterized protein LOC105347562 [Crassostrea gigas]
TR42869_c0_g1	--	--	Molecular Function: extracellular ligand-gated ion channel activity (GO:0005230);; Cellular Component: integral component of membrane (GO:0016021);; Biological Process: ion transmembrane transport (GO:0034220);;	--	[U]	Intracellular trafficking, secretion, and vesicular transport	Neurotransmitter-gated ion-channel transmembrane region	Acetylcholine receptor subunit beta-type unc-29 (Precursor) GN=unc-29 OS=Caenorhabditis elegans PE=2 SV=2	PREDICTED: neuronal acetylcholine receptor subunit alpha-6-like [Crassostrea gigas]
TR19335_c1_g1	--	--	--	--	[T]	Signal transduction mechanisms	GPCR proteolysis site, GPS, motif;; GPCR-Autoproteolysis INducing (GAIN) domain	Latrophilin-like protein LAT-2 {ECO:0000312|EMBL:CCD61661.1, ECO:0000312|WormBase:B0286.2b} (Precursor) OS=Caenorhabditis elegans PE=2 SV=1	PREDICTED: latrophilin-1-like [Strongylocentrotus purpuratus]
TR58372_c0_g1	[P]	Inorganic ion transport and metabolism	Biological Process: phosphate ion transport (GO:0006817);; Molecular Function: phosphate ion transmembrane transporter activity (GO:0015114);;	K14683|0.0|bfo:BRAFLDRAFT_124889|hypothetical protein	--	--	Na+/Pi-cotransporter	--	PREDICTED: sodium-dependent phosphate transport protein 2B-like [Crassostrea gigas]
TR53328_c0_g1	--	--	--	--	[R]	General function prediction only	Tissue inhibitor of metalloproteinase;; UNC-6/NTR/C345C module	NTR domain-containing protein (Precursor) OS=Pinctada margaritifera (Black-lipped pearl oyster) PE=1 SV=1	PREDICTED: metalloproteinase inhibitor 3-like [Crassostrea gigas]
TR7971_c0_g1	--	--	--	--	--	--	--	--	PREDICTED: uncharacterized protein K02A2.6-like [Strongylocentrotus purpuratus]
TR10048_c0_g2	--	--	--	--	--	--	--	Mediator of RNA polymerase II transcription subunit 12 GN=dpy-22 OS=Caenorhabditis elegans PE=1 SV=2	hypothetical protein CAPTEDRAFT_17708 [Capitella teleta]
TR58812_c0_g1	--	--	--	--	--	--	Sushi repeat (SCR repeat)	Limulus clotting factor C chain B (Precursor) OS=Tachypleus tridentatus (Japanese horseshoe crab) PE=1 SV=1	PREDICTED: uncharacterized protein LOC581873 [Strongylocentrotus purpuratus]
TR36035_c0_g1	--	--	Molecular Function: binding (GO:0005488);; Cellular Component: extracellular region (GO:0005576);; Biological Process: metabolic process (GO:0008152);;	--	[O]	Posttranslational modification, protein turnover, chaperones	A-macroglobulin complement component;; A-macroglobulin receptor;; MG2 domain;; Alpha-2-macroglobulin family N-terminal region;; Alpha-2-macroglobulin family	--	PREDICTED: CD109 antigen-like [Crassostrea gigas]
TR56773_c0_g1	--	--	--	--	[RP]	--	Immunoglobulin domain;; Immunoglobulin I-set domain;; Immunoglobulin domain	Peroxidasin (Precursor) GN=Pxn OS=Drosophila melanogaster (Fruit fly) PE=1 SV=1	PREDICTED: uncharacterized protein LOC105337550 [Crassostrea gigas]
TR27532_c0_g1	--	--	--	--	--	--	--	Galaxin {ECO:0000312|EMBL:ADI50283.1} (Precursor) OS=Acropora millepora (Staghorn coral) PE=1 SV=1	PREDICTED: usherin-like [Hydra vulgaris]
TR50486_c1_g1	[G]	Carbohydrate transport and metabolism	Biological Process: metabolic process (GO:0008152);; Molecular Function: hydrolase activity (GO:0016787);;	--	--	--	Glycosyl hydrolase family 10;; Glycosyl hydrolase catalytic core	--	hypothetical protein LOTGIDRAFT_114181 [Lottia gigantea]
TR53040_c0_g1	--	--	--	--	[TR]	--	BTB/POZ domain	Kelch-like protein diablo {ECO:0000250|UniProtKB:Q9VUU5} OS=Anopheles gambiae (African malaria mosquito) PE=3 SV=4	PREDICTED: uncharacterized protein LOC105321341 [Crassostrea gigas]
TR46160_c0_g1	--	--	Biological Process: transport (GO:0006810);;	--	[U]	Intracellular trafficking, secretion, and vesicular transport	Neurotransmitter-gated ion-channel ligand binding domain	Acetylcholine receptor subunit alpha-L1 (Precursor) OS=Schistocerca gregaria (Desert locust) PE=2 SV=1	nicotinic acetylcholine receptor subunit alpha 3 [Pandalopsis japonica]
TR13375_c0_g1	--	--	--	--	[R]	General function prediction only	Zinc finger, C2H2 type;; C2H2-type zinc finger	Zinc finger protein sens GN=sens OS=Drosophila melanogaster (Fruit fly) PE=1 SV=1	GK16454 [Drosophila willistoni]
TR39268_c0_g1	--	--	--	--	--	--	--	--	hypothetical protein LOTGIDRAFT_121403, partial [Lottia gigantea]
TR4517_c0_g1	[E]	Amino acid transport and metabolism	Molecular Function: carboxy-lyase activity (GO:0016831);;	K01594|1e-173|mcc:701290|CSAD	[E]	Amino acid transport and metabolism	Pyridoxal-dependent decarboxylase conserved domain;; Beta-eliminating lyase;; Aminotransferase class-V	Glutamate decarboxylase GN=Gad1 OS=Drosophila melanogaster (Fruit fly) PE=2 SV=2	PREDICTED: cysteine sulfinic acid decarboxylase-like [Crassostrea gigas]
TR17496_c0_g2	--	--	--	--	--	--	--	Putative uncharacterized protein DDB_G0282133 GN=DDB_G0282133 OS=Dictyostelium discoideum (Slime mold) PE=4 SV=2	hypothetical protein DDB_G0282111 [Dictyostelium discoideum AX4]
TR14379_c0_g1	--	--	--	--	--	--	--	--	PREDICTED: uncharacterized protein C20orf194-like, partial [Saccoglossus kowalevskii]
TR51623_c0_g1	[O]	Posttranslational modification, protein turnover, chaperones	--	--	[O]	Posttranslational modification, protein turnover, chaperones	Hsp70 protein	Major heat shock 70 kDa protein Ab GN=Hsp70Ab OS=Drosophila melanogaster (Fruit fly) PE=2 SV=3	PREDICTED: heat shock 70 kDa protein 12A-like [Crassostrea gigas]
TR26187_c0_g1	--	--	--	--	--	--	--	--	PREDICTED: centrosomal protein POC5-like [Crassostrea gigas]
TR57845_c0_g1	[M]	Cell wall/membrane/envelope biogenesis	Molecular Function: glycogen (starch) synthase activity (GO:0004373);; Biological Process: glycogen biosynthetic process (GO:0005978);;	K00693|0.0|ame:552328|glycogen synthase	[G]	Carbohydrate transport and metabolism	Glycogen synthase;; Starch synthase catalytic domain	Glycogen [starch] synthase GN=GlyS OS=Drosophila melanogaster (Fruit fly) PE=1 SV=2	PREDICTED: glycogen [starch] synthase-like isoform X1 [Crassostrea gigas]
TR30064_c3_g4	--	--	--	--	--	--	--	--	predicted protein [Nematostella vectensis]
TR36014_c0_g1	--	--	--	K11428|2e-06|tad:TRIADDRAFT_59058|hypothetical protein	--	--	--	--	PREDICTED: uncharacterized protein LOC105437736 [Strongylocentrotus purpuratus]
TR17703_c0_g1	--	--	--	--	--	--	--	Sporozoite surface protein 2 (Precursor) GN=SSP2 OS=Plasmodium yoelii yoelii PE=1 SV=2	PREDICTED: uncharacterized protein LOC105326200 isoform X3 [Crassostrea gigas]
TR50325_c0_g1	--	--	--	--	--	--	Protein of unknown function (DUF1759)	--	PREDICTED: uncharacterized protein LOC101240217 [Hydra vulgaris]
TR51423_c0_g2	--	--	--	--	--	--	TLD	--	Interferon-induced protein 44-like protein [Crassostrea gigas]
TR33170_c0_g1	--	--	--	--	[BK]	--	Macro domain	--	PREDICTED: poly [ADP-ribose] polymerase 14-like, partial [Crassostrea gigas]
TR40310_c1_g2	[A]	RNA processing and modification	Molecular Function: ATP binding (GO:0005524);; Cellular Component: mRNA cleavage factor complex (GO:0005849);; Biological Process: mRNA 3'-end processing (GO:0031124);;	K14399|0.0|gga:423131|CLP1	[A]	RNA processing and modification	mRNA cleavage and polyadenylation factor CLP1 P-loop;; N-terminal beta-sandwich domain of polyadenylation factor;; Pre-mRNA cleavage complex II protein Clp1	Protein CLP1 homolog {ECO:0000255|HAMAP-Rule:MF_03035} GN=cbc OS=Anopheles gambiae (African malaria mosquito) PE=3 SV=2	PREDICTED: polyribonucleotide 5&apos;-hydroxyl-kinase Clp1-like [Crassostrea gigas]
TR53164_c0_g1	--	--	Biological Process: protein transport (GO:0015031);;	--	[S]	Function unknown	RWD domain	Uncharacterized protein DDB_G0271670 (Precursor) GN=DDB_G0271670 OS=Dictyostelium discoideum (Slime mold) PE=3 SV=1	PREDICTED: RWD domain-containing protein 1-like [Crassostrea gigas]
TR50620_c2_g1	--	--	--	--	--	--	--	--	PREDICTED: BRCA1-A complex subunit Abraxas-like isoform X1 [Aplysia californica]
TR23418_c0_g1	--	--	--	--	[T]	Signal transduction mechanisms	TIR domain;; TIR domain	Protein toll (Precursor) GN=Tl OS=Drosophila melanogaster (Fruit fly) PE=1 SV=1	PREDICTED: uncharacterized protein LOC105335941 [Crassostrea gigas]
TR56745_c0_g1	--	--	--	--	--	--	--	--	PREDICTED: uncharacterized protein LOC105339432 [Crassostrea gigas]
TR33929_c1_g1	--	--	--	K09525|3e-06|dre:322863|dnajc5g, fb75d01, wu:fb75d01, zgc:56703	--	--	--	--	hypothetical protein, conserved [Eimeria necatrix]
TR13829_c0_g1	--	--	--	--	--	--	cAMP-dependent protein kinase inhibitor	--	PREDICTED: cAMP-dependent protein kinase inhibitor beta-like [Metaseiulus occidentalis]
TR53759_c0_g1	--	--	Molecular Function: transferase activity (GO:0016740);;	--	[TV]	--	Sushi repeat (SCR repeat)	Protein lev-9 (Precursor) GN=lev-9 OS=Caenorhabditis elegans PE=1 SV=3	PREDICTED: uncharacterized protein LOC105338278 [Crassostrea gigas]
TR27636_c1_g1	--	--	--	--	--	--	--	Muscle M-line assembly protein unc-89 GN=unc-89 OS=Caenorhabditis elegans PE=1 SV=3	PREDICTED: axonemal dynein light chain domain-containing protein 1-like isoform X2 [Crassostrea gigas]
TR34500_c0_g1	--	--	--	--	--	--	CST, telomere maintenance, complex subunit CTC1	--	PREDICTED: CST complex subunit CTC1-like [Crassostrea gigas]
TR45169_c0_g1	--	--	Molecular Function: hydrolase activity (GO:0016787);;	--	[C]	Energy production and conversion	--	--	PREDICTED: glycerophosphodiester phosphodiesterase domain-containing protein 5-like [Crassostrea gigas]
TR15218_c0_g1	--	--	Molecular Function: binding (GO:0005488);;	--	[O]	Posttranslational modification, protein turnover, chaperones	--	Reticulocyte binding protein 2 homolog b GN=Rh2b OS=Plasmodium falciparum (isolate 3D7) PE=3 SV=1	PREDICTED: E3 ubiquitin-protein ligase RNF168-like [Crassostrea gigas]
TR29675_c0_g1	[S]	Function unknown	--	--	[T]	Signal transduction mechanisms	Leucine Rich repeats (2 copies);; Leucine-rich repeat;; Leucine rich repeat	Protein phosphatase 1 regulatory subunit SDS22 homolog GN=sds-22 OS=Caenorhabditis elegans PE=3 SV=1	Protein phosphatase 1 regulatory subunit 7 [Crassostrea gigas]
TR17641_c0_g2	[R]	General function prediction only	Biological Process: animal organ development (GO:0048513);;	--	[K]	Transcription	Zinc-finger of C2H2 type;; C2H2-type zinc finger;; Zinc-finger double-stranded RNA-binding	Zinc finger protein squeeze GN=sqz OS=Drosophila melanogaster (Fruit fly) PE=1 SV=2	PREDICTED: homeotic protein spalt-major-like [Diaphorina citri]
TR10673_c8_g1	[R]	General function prediction only	Molecular Function: binding (GO:0005488);;	--	[R]	General function prediction only	Zinc finger, C2H2 type;; C2H2-type zinc finger	Protein krueppel GN=Kr OS=Drosophila melanogaster (Fruit fly) PE=1 SV=2	homeotic protein spalt-major [Culex quinquefasciatus]
TR33150_c1_g1	--	--	--	--	--	--	EB module	Prion-like-(Q/N-rich) domain-bearing protein 25 GN=pqn-25 OS=Caenorhabditis elegans PE=4 SV=3	PREDICTED: fibrillin-2-like [Microplitis demolitor]
TR6789_c0_g1	--	--	--	--	[IU]	--	FYVE zinc finger	--	PREDICTED: protrudin-like [Crassostrea gigas]
TR15935_c1_g1	--	--	Molecular Function: [acyl-carrier-protein] S-acetyltransferase activity (GO:0004313);; Molecular Function: [acyl-carrier-protein] S-malonyltransferase activity (GO:0004314);; Molecular Function: 3-oxoacyl-[acyl-carrier-protein] synthase activity (GO:0004315);; Molecular Function: 3-oxoacyl-[acyl-carrier-protein] reductase (NADPH) activity (GO:0004316);; Molecular Function: 3-hydroxypalmitoyl-[acy…	K00665|1e-145|dre:335859|fasn, fj34h12, wu:fj34h12	[I]	Lipid transport and metabolism	Acyl transferase domain	Probable polyketide synthase 42 GN=pks42 OS=Dictyostelium discoideum (Slime mold) PE=3 SV=2	hypothetical protein LOTGIDRAFT_235996 [Lottia gigantea]
TR51191_c0_g2	--	--	--	--	[R]	General function prediction only	7 transmembrane receptor (rhodopsin family)	Probable muscarinic acetylcholine receptor gar-1 GN=gar-1 OS=Caenorhabditis elegans PE=2 SV=3	PREDICTED: alpha-2 adrenergic receptor-like isoform X1 [Crassostrea gigas]
TR38864_c0_g1	[R]	General function prediction only	--	--	[O]	Posttranslational modification, protein turnover, chaperones	Ankyrin repeats (many copies);; Ankyrin repeats (many copies);; Ankyrin repeat;; Ankyrin repeats (3 copies);; Ankyrin repeat	Ankyrin repeat, PH and SEC7 domain containing protein secG GN=secG OS=Dictyostelium discoideum (Slime mold) PE=2 SV=1	hypothetical protein [Trichomonas vaginalis G3]
TR53700_c0_g1	--	--	Molecular Function: DNA binding (GO:0003677);; Cellular Component: nucleus (GO:0005634);; Biological Process: regulation of transcription, DNA-templated (GO:0006355);; Molecular Function: protein dimerization activity (GO:0046983);;	K06054|3e-41|pon:100455979|transcription factor HES-1-like	[K]	Transcription	Helix-loop-helix DNA-binding domain;; Hairy Orange	Protein hairy GN=h OS=Drosophila melanogaster (Fruit fly) PE=1 SV=2	hypothetical protein LOTGIDRAFT_74634, partial [Lottia gigantea]
TR30579_c0_g1	[C]	Energy production and conversion	Biological Process: transport (GO:0006810);;	--	[E]	Amino acid transport and metabolism	Sodium:dicarboxylate symporter family	Excitatory amino acid transporter GN=glt-1 OS=Caenorhabditis elegans PE=1 SV=2	PREDICTED: excitatory amino acid transporter-like [Crassostrea gigas]
TR26292_c0_g1	[V]	Defense mechanisms	Molecular Function: nucleotide binding (GO:0000166);; Biological Process: transport (GO:0006810);; Biological Process: organelle organization (GO:0006996);; Molecular Function: ATPase activity (GO:0016887);; Biological Process: lipid storage (GO:0019915);; Cellular Component: gut granule membrane (GO:0044841);;	--	[Q]	Secondary metabolites biosynthesis, transport and catabolism	ABC transporter transmembrane region	ABC transporter B family member 2 GN=abcB2 OS=Dictyostelium discoideum (Slime mold) PE=3 SV=1	PREDICTED: multidrug resistance protein 1 [Strongylocentrotus purpuratus]
TR22217_c0_g1	--	--	Molecular Function: carbohydrate binding (GO:0030246);;	K10093|2e-75|bfo:BRAFLDRAFT_126856|hypothetical protein	[W]	Extracellular structures	Galactoside-binding lectin	32 kDa beta-galactoside-binding lectin GN=GAL-1 OS=Haemonchus contortus (Barber pole worm) PE=2 SV=1	tandem repeat galectin [Ruditapes philippinarum]
TR18792_c1_g1	--	--	--	--	[O]	Posttranslational modification, protein turnover, chaperones	--	--	Heat shock 70 kDa protein 12B [Crassostrea gigas]
TR41258_c0_g1	--	--	--	--	[S]	Function unknown	Protein of unknown function (DUF563)	Uncharacterized protein PFB0315w GN=PFB0315w OS=Plasmodium falciparum (isolate 3D7) PE=4 SV=2	hypothetical protein LOTGIDRAFT_194055 [Lottia gigantea]
TR3148_c0_g1	--	--	--	--	--	--	--	--	PREDICTED: unconventional myosin-XVI-like [Crassostrea gigas]
TR23546_c0_g1	--	--	Biological Process: ion transport (GO:0006811);;	--	[T]	Signal transduction mechanisms	Neurotransmitter-gated ion-channel transmembrane region;; Neurotransmitter-gated ion-channel ligand binding domain	Acetylcholine receptor subunit beta-type unc-29 (Precursor) GN=unc-29 OS=Caenorhabditis elegans PE=2 SV=2	Neuronal acetylcholine receptor subunit alpha-6 [Crassostrea gigas]
TR21392_c0_g1	[M]	Cell wall/membrane/envelope biogenesis	Molecular Function: hydrolase activity, acting on glycosyl bonds (GO:0016798);;	--	[G]	Carbohydrate transport and metabolism	Glycosyl hydrolase family 81	--	hypothetical protein LOTGIDRAFT_237425 [Lottia gigantea]
TR26849_c0_g1	[G]	Carbohydrate transport and metabolism	--	--	[G]	Carbohydrate transport and metabolism	Alpha amylase, catalytic domain;; Solute carrier family 3 member 2 N-terminus	Maltase 1 (Precursor) GN=Mal-B1 OS=Drosophila virilis (Fruit fly) PE=3 SV=2	PREDICTED: neutral and basic amino acid transport protein rBAT-like isoform X1 [Crassostrea gigas]
TR8584_c1_g1	[IR]	--	Biological Process: metabolic process (GO:0008152);; Biological Process: cellular process (GO:0009987);; Molecular Function: kinase activity (GO:0016301);; Molecular Function: phosphotransferase activity, alcohol group as acceptor (GO:0016773);;	K04715|7e-60|dre:558496|cerk, si:ch211-162i19.1	[IT]	--	Diacylglycerol kinase catalytic domain	Ceramide kinase 1 GN=T10B11.2 OS=Caenorhabditis elegans PE=3 SV=1	PREDICTED: ceramide kinase-like [Aplysia californica]
TR28334_c1_g1	[NT]	--	--	--	[PT]	--	--	--	hypothetical protein BRAFLDRAFT_93675 [Branchiostoma floridae]
TR47352_c0_g1	[R]	General function prediction only	Molecular Function: GTP binding (GO:0005525);; Biological Process: small GTPase mediated signal transduction (GO:0007264);; Biological Process: protein transport (GO:0015031);;	K07881|1e-39|bfo:BRAFLDRAFT_57441|hypothetical protein	[U]	Intracellular trafficking, secretion, and vesicular transport	Ras family;; Ras of Complex, Roc, domain of DAPkinase;; ADP-ribosylation factor family;; 50S ribosome-binding GTPase;; Gtr1/RagA G protein conserved region	Ras-related protein Rab-2 GN=RAB2 OS=Lymnaea stagnalis (Great pond snail) PE=2 SV=1	hypothetical protein LOTGIDRAFT_232207 [Lottia gigantea]
TR20743_c0_g1	--	--	--	K08881|6e-13|dre:442869|trim24, tif1a, tifa, wu:fi24g04	[O]	Posttranslational modification, protein turnover, chaperones	B-box zinc finger	--	PREDICTED: E3 ubiquitin-protein ligase TRIM33-like [Metaseiulus occidentalis]
TR51897_c0_g2	--	--	--	--	--	--	--	--	hypothetical protein CGI_10003849 [Crassostrea gigas]
TR34923_c0_g2	--	--	--	--	[T]	Signal transduction mechanisms	Calcium-binding EGF domain;; EGF-like domain;; Human growth factor-like EGF;; EGF domain;; EGF-like domain;; Complement Clr-like EGF-like	Processed neurogenic locus Notch protein (Precursor) GN=N OS=Drosophila melanogaster (Fruit fly) PE=1 SV=3	PREDICTED: uncharacterized protein LOC105349053 [Crassostrea gigas]
TR18661_c0_g1	--	--	--	--	--	--	C1q domain	--	PREDICTED: complement C1q tumor necrosis factor-related protein 3-like [Crassostrea gigas]
TR8162_c0_g1	--	--	--	K11587|2e-10|cqu:CpipJ_CPIJ001135|chromobox protein	[A]	RNA processing and modification	Chromo (CHRromatin Organisation MOdifier) domain	Heterochromatin protein 1 GN=Su(var)205 OS=Drosophila melanogaster (Fruit fly) PE=1 SV=2	PREDICTED: heterochromatin protein 1-like [Crassostrea gigas]
TR5946_c0_g2	--	--	--	--	--	--	--	--	complement component C3 [Ruditapes decussatus]
TR42451_c0_g1	--	--	--	--	--	--	--	--	PREDICTED: substance-P receptor-like [Crassostrea gigas]
TR1628_c0_g1	--	--	--	--	--	--	--	Putative uncharacterized protein DDB_G0290521 (Precursor) GN=DDB_G0290521 OS=Dictyostelium discoideum (Slime mold) PE=3 SV=2	--
TR21085_c0_g2	--	--	--	--	--	--	HYR domain	--	Sushi, von Willebrand factor type A, EGF and pentraxin domain-containing protein 1 [Crassostrea gigas]
TR57354_c4_g1	--	--	Cellular Component: integral component of membrane (GO:0016021);;	--	[S]	Function unknown	Transmembrane protein	Putative leucine-rich repeat-containing protein DDB_G0290503 GN=DDB_G0290503 OS=Dictyostelium discoideum (Slime mold) PE=3 SV=1	PREDICTED: macoilin-like [Crassostrea gigas]
TR28301_c0_g1	--	--	--	--	--	--	Fasciclin domain	--	PREDICTED: uncharacterized protein LOC105334182 isoform X3 [Crassostrea gigas]
TR10627_c5_g5	--	--	--	--	[TV]	--	Lectin C-type domain	Perlucin OS=Haliotis laevigata (Abalone) PE=1 SV=3	PREDICTED: perlucin-like isoform X1 [Crassostrea gigas]
TR5430_c0_g1	--	--	--	--	[R]	General function prediction only	Integrase core domain	Putative uncharacterized transposon-derived protein F54H12.3 GN=F54H12.3 OS=Caenorhabditis elegans PE=5 SV=1	PREDICTED: uncharacterized protein LOC101239501 [Hydra vulgaris]
TR28095_c0_g1	--	--	--	--	--	--	RNA recognition motif. (a.k.a. RRM, RBD, or RNP domain)	--	hypothetical protein CGI_10007309 [Crassostrea gigas]
TR12198_c0_g1	--	--	Molecular Function: DNA binding (GO:0003677);; Molecular Function: transcription factor activity, sequence-specific DNA binding (GO:0003700);; Molecular Function: signal transducer activity (GO:0004871);; Cellular Component: nucleus (GO:0005634);; Cellular Component: transcription factor complex (GO:0005667);; Cellular Component: cytoplasm (GO:0005737);; Biological Process: regulation of transcri…	K09100|1e-153|bfo:BRAFLDRAFT_265033|hypothetical protein	[K]	Transcription	PAS fold;; PAS domain;; PAS fold;; PAS domain	Protein single-minded GN=sim OS=Drosophila melanogaster (Fruit fly) PE=1 SV=3	hypothetical protein CAPTEDRAFT_165634, partial [Capitella teleta]
TR42571_c1_g1	--	--	Molecular Function: catalytic activity (GO:0003824);;	--	--	--	Berberine and berberine like	--	hypothetical protein LOTGIDRAFT_174677, partial [Lottia gigantea]
TR33692_c0_g2	--	--	--	--	--	--	--	Uncharacterized protein DDB_G0271670 (Precursor) GN=DDB_G0271670 OS=Dictyostelium discoideum (Slime mold) PE=3 SV=1	NOTCH2 protein [Salpingoeca rosetta]
TR36194_c0_g1	--	--	--	--	[T]	Signal transduction mechanisms	von Willebrand factor type A domain;; von Willebrand factor type A domain;; Chitin binding Peritrophin-A domain;; von Willebrand factor type A domain	Transmembrane matrix receptor MUP-4 {ECO:0000312|EMBL:AAK69172.1} (Precursor) OS=Caenorhabditis elegans PE=1 SV=4	PREDICTED: uncharacterized protein LOC105331104 [Crassostrea gigas]
TR47622_c0_g1	--	--	Biological Process: metabolic process (GO:0008152);;	--	[T]	Signal transduction mechanisms	Cadherin domain	Protocadherin-like wing polarity protein stan (Precursor) GN=stan OS=Drosophila melanogaster (Fruit fly) PE=1 SV=4	PREDICTED: protocadherin Fat 4-like [Aplysia californica]
TR58200_c1_g1	[Q]	Secondary metabolites biosynthesis, transport and catabolism	Biological Process: metabolic process (GO:0008152);; Molecular Function: transferase activity, transferring acyl groups other than amino-acyl groups (GO:0016747);;	--	--	--	Beta-ketoacyl synthase, N-terminal domain	Chalcone synthase stlB GN=stlB OS=Dictyostelium discoideum (Slime mold) PE=2 SV=1	hypothetical protein LOTGIDRAFT_113304, partial [Lottia gigantea]
TR14122_c0_g1	--	--	Biological Process: metabolic process (GO:0008152);; Molecular Function: oxidoreductase activity (GO:0016491);;	--	--	--	PLAT/LH2 domain	Arachidonate 8-lipoxygenase OS=Plexaura homomalla (Black sea rod) PE=1 SV=1	hypothetical protein LOTGIDRAFT_209217 [Lottia gigantea]
TR4380_c0_g1	--	--	Cellular Component: intracellular (GO:0005622);; Biological Process: signal transduction (GO:0007165);;	--	[U]	Intracellular trafficking, secretion, and vesicular transport	--	Receptor-mediated endocytosis protein 6 homolog GN=CG1657 OS=Drosophila melanogaster (Fruit fly) PE=1 SV=2	PREDICTED: GTPase-activating protein and VPS9 domain-containing protein 1-like [Aplysia californica]
TR45397_c0_g1	--	--	Molecular Function: catalytic activity (GO:0003824);;	--	[Z]	Cytoskeleton	--	Calponin homology domain-containing protein DDB_G0272472 GN=DDB_G0272472 OS=Dictyostelium discoideum (Slime mold) PE=3 SV=1	PREDICTED: myosin-9-like [Crassostrea gigas]
TR29838_c0_g1	--	--	--	--	--	--	Abnormal spindle-like microcephaly-assoc'd, ASPM-SPD-2-Hydin;; MYCBP-associated protein family	--	PREDICTED: uncharacterized protein LOC105321838 isoform X2 [Crassostrea gigas]
TR30308_c0_g1	--	--	--	--	--	--	Domain of unknown function (DUF4503)	--	predicted protein [Nematostella vectensis]
TR13927_c0_g2	--	--	Molecular Function: ubiquitin-protein transferase activity (GO:0004842);; Biological Process: protein ubiquitination (GO:0016567);; Molecular Function: ligase activity (GO:0016874);;	K10591|5e-48|nve:NEMVE_v1g161803|hypothetical protein	[O]	Posttranslational modification, protein turnover, chaperones	WW domain	E3 ubiquitin-protein ligase Nedd-4 GN=Nedd4 OS=Drosophila melanogaster (Fruit fly) PE=1 SV=2	PREDICTED: E3 ubiquitin-protein ligase NEDD4-like isoform X2 [Crassostrea gigas]
TR31966_c0_g1	--	--	Molecular Function: binding (GO:0005488);;	--	--	--	PWWP domain	Putative uncharacterized protein DDB_G0282129 GN=DDB_G0282129 OS=Dictyostelium discoideum (Slime mold) PE=4 SV=1	PREDICTED: uncharacterized protein LOC105343387 isoform X2 [Crassostrea gigas]
TR50317_c0_g1	--	--	Molecular Function: hydrolase activity (GO:0016787);;	K06059|4e-15|xla:733430|adam17, adam18, cd156b, csvp, tace	[W]	Extracellular structures	Metallo-peptidase family M12	ADAM 17-like protease (Precursor) GN=Tace OS=Drosophila melanogaster (Fruit fly) PE=2 SV=2	hypothetical protein LOTGIDRAFT_140416, partial [Lottia gigantea]
TR18350_c0_g1	[S]	Function unknown	--	--	--	--	Bacterial protein of unknown function (DUF885)	--	PREDICTED: uncharacterized protein LOC105326092 isoform X1 [Crassostrea gigas]
TR6230_c0_g1	--	--	Biological Process: lipid metabolic process (GO:0006629);; Molecular Function: phosphoric diester hydrolase activity (GO:0008081);; Biological Process: intracellular signal transduction (GO:0035556);;	K05860|1e-49|isc:IscW_ISCW009315|phospholipase C epsilon, putative	--	--	RasGEF domain	--	PREDICTED: uncharacterized protein LOC105331084 isoform X1 [Crassostrea gigas]
TR10807_c0_g3	--	--	--	--	[R]	General function prediction only	Zinc-finger of the MIZ type in Nse subunit	--	PREDICTED: E3 SUMO-protein ligase NSE2-like [Crassostrea gigas]
TR36957_c0_g2	--	--	Molecular Function: catalytic activity (GO:0003824);;	K01315|8e-48|dre:322691|plg, wu:fb70e09	--	--	Kringle domain	Tyrosine-protein kinase transmembrane receptor Ror2 (Precursor) GN=Nrk OS=Drosophila melanogaster (Fruit fly) PE=1 SV=2	hypothetical protein BRAFLDRAFT_71581 [Branchiostoma floridae]
TR14747_c0_g2	--	--	--	--	--	--	--	Sericin-2 (Fragment) GN=SER2 OS=Galleria mellonella (Greater wax moth) PE=2 SV=1	cement precursor protein 3B [Sabellaria alveolata]
TR57117_c0_g1	--	--	Cellular Component: organelle (GO:0043226);; Cellular Component: cell part (GO:0044464);;	--	--	--	--	--	PREDICTED: dynein-1-beta heavy chain, flagellar inner arm I1 complex-like [Crassostrea gigas]
TR39227_c0_g1	--	--	--	--	--	--	Death domain	--	--
TR46943_c2_g1	[O]	Posttranslational modification, protein turnover, chaperones	--	--	--	--	Lectin C-type domain	Perlucin-like protein {ECO:0000303|PubMed:21643827} (Precursor) OS=Mytilus galloprovincialis (Mediterranean mussel) PE=1 SV=1	C-type lectin [Littorina littorea]
TR27221_c0_g1	--	--	--	--	--	--	Poly(ADP-ribose) polymerase catalytic domain	Interaptin GN=abpD OS=Dictyostelium discoideum (Slime mold) PE=1 SV=1	Poly [ADP-ribose] polymerase 14 [Crassostrea gigas]
TR7132_c0_g2	--	--	--	--	--	--	EB module	Probable cubilin (Precursor) GN=ZC116.3 OS=Caenorhabditis elegans PE=1 SV=4	PREDICTED: cell death abnormality protein 1-like [Aplysia californica]
TR14221_c0_g2	--	--	Cellular Component: endoplasmic reticulum membrane (GO:0005789);; Cellular Component: integral component of membrane (GO:0016021);;	--	[U]	Intracellular trafficking, secretion, and vesicular transport	Reticulon	--	PREDICTED: reticulon-1-A-like isoform X6 [Crassostrea gigas]
TR44549_c0_g2	--	--	Molecular Function: binding (GO:0005488);;	--	--	--	--	--	PREDICTED: uncharacterized protein LOC105333787 [Crassostrea gigas]
TR48407_c1_g1	--	--	--	K09407|2e-13|bfo:BRAFLDRAFT_125520|hypothetical protein	[K]	Transcription	--	Putative protein DDB_G0292252 GN=DDB_G0292252 OS=Dictyostelium discoideum (Slime mold) PE=4 SV=1	PREDICTED: forkhead box protein N4-like [Crassostrea gigas]
TR28036_c0_g1	--	--	--	--	--	--	PH domain	GTP exchange factor for ARFs 1 GN=grp-1 OS=Caenorhabditis elegans PE=3 SV=2	PREDICTED: pleckstrin homology domain-containing family B member 2-like [Crassostrea gigas]
TR24929_c0_g1	--	--	--	K01691|3e-15|oaa:100079442|similar to Wnt inhibitory factor-1	[TW]	--	--	Anterior pharynx in excess protein 1 (Precursor) GN=apx-1 OS=Caenorhabditis elegans PE=2 SV=1	PREDICTED: cartilage intermediate layer protein 1-like [Crassostrea gigas]
TR50892_c0_g1	--	--	Molecular Function: copper ion binding (GO:0005507);; Molecular Function: oxidoreductase activity, acting on paired donors, with incorporation or reduction of molecular oxygen, reduced ascorbate as one donor, and incorporation of one atom of oxygen (GO:0016715);; Biological Process: oxidation-reduction process (GO:0055114);;	--	[E]	Amino acid transport and metabolism	Copper type II ascorbate-dependent monooxygenase, N-terminal domain;; DOMON domain	MOXD1 homolog 2 GN=olf413 OS=Drosophila melanogaster (Fruit fly) PE=2 SV=1	dopamine beta hydroxylase [Azumapecten farreri]
TR33214_c0_g1	--	--	--	--	--	--	Synaptonemal complex central element protein 3	--	hypothetical protein CGI_10021012 [Crassostrea gigas]
TR20813_c0_g2	[R]	General function prediction only	--	--	[R]	General function prediction only	--	Zinc finger protein squeeze GN=sqz OS=Drosophila melanogaster (Fruit fly) PE=1 SV=2	PREDICTED: zinc finger protein 26-like [Saccoglossus kowalevskii]
TR49215_c0_g1	--	--	--	--	--	--	--	--	hypothetical protein CAPTEDRAFT_186544 [Capitella teleta]
TR11622_c0_g2	--	--	--	--	--	--	--	--	Coiled-coil domain-containing protein 17 [Crassostrea gigas]
TR30097_c3_g2	--	--	--	--	[K]	Transcription	bZIP transcription factor;; bZIP Maf transcription factor	Transcription factor kayak {ECO:0000250|UniProtKB:P21525} OS=Drosophila persimilis (Fruit fly) PE=3 SV=1	PREDICTED: transcription factor kayak-like [Crassostrea gigas]
TR7696_c0_g1	[R]	General function prediction only	Biological Process: metabolic process (GO:0008152);; Molecular Function: hydrolase activity (GO:0016787);;	K13617|6e-93|phu:Phum_PHUM491370|protein phosphatase methylesterase, putative	[R]	General function prediction only	Alpha/beta hydrolase family;; alpha/beta hydrolase fold;; Serine aminopeptidase, S33;; Thioesterase domain	Probable protein phosphatase methylesterase 1 GN=B0464.9 OS=Caenorhabditis elegans PE=3 SV=1	PREDICTED: protein phosphatase methylesterase 1-like [Crassostrea gigas]
TR39059_c0_g1	--	--	Cellular Component: nucleus (GO:0005634);; Cellular Component: endoplasmic reticulum (GO:0005783);; Molecular Function: disulfide oxidoreductase activity (GO:0015036);;	--	[R]	General function prediction only	--	--	PREDICTED: LOW QUALITY PROTEIN: 15 kDa selenoprotein-like [Saccoglossus kowalevskii]
TR36117_c0_g1	--	--	--	--	[R]	General function prediction only	Guanylate-binding protein, C-terminal domain	--	--
TR47632_c1_g1	--	--	Molecular Function: DNA binding (GO:0003677);; Biological Process: transcription, DNA-templated (GO:0006351);; Molecular Function: metal ion binding (GO:0046872);; Biological Process: regulation of cellular process (GO:0050794);;	--	[K]	Transcription	Zinc finger, C4 type (two domains)	Ecdysone-induced protein 75B, isoforms C/D GN=Eip75B OS=Drosophila melanogaster (Fruit fly) PE=2 SV=2	PREDICTED: probable nuclear hormone receptor HR3 [Crassostrea gigas]
TR2278_c0_g1	--	--	--	--	--	--	--	--	PREDICTED: zinc finger protein 628-like isoform X4 [Crassostrea gigas]
TR32717_c0_g1	[H]	Coenzyme transport and metabolism	Biological Process: tRNA wobble position uridine thiolation (GO:0002143);; Molecular Function: thiosulfate sulfurtransferase activity (GO:0004792);; Molecular Function: ATP binding (GO:0005524);; Cellular Component: cytosol (GO:0005829);; Biological Process: Mo-molybdopterin cofactor biosynthetic process (GO:0006777);; Molecular Function: nucleotidyltransferase activity (GO:0016779);; Biological …	K11996|1e-173|dre:393095|mocs3, MGC55696, zgc:55696	[H]	Coenzyme transport and metabolism	ThiF family;; Rhodanese-like domain	Molybdopterin-synthase sulfurtransferase {ECO:0000255|HAMAP-Rule:MF_03049} GN=AAEL004607 OS=Aedes aegypti (Yellowfever mosquito) PE=3 SV=1	hypothetical protein LOTGIDRAFT_133196 [Lottia gigantea]
TR102_c0_g1	--	--	--	--	--	--	--	--	hypothetical protein CGI_10017667 [Crassostrea gigas]
TR13338_c0_g1	--	--	--	--	--	--	--	--	PREDICTED: uncharacterized protein LOC105323587 isoform X2 [Crassostrea gigas]
TR31955_c0_g1	--	--	--	--	[T]	Signal transduction mechanisms	Concanavalin A-like lectin/glucanases superfamily	Teneurin-m GN=Ten-m OS=Drosophila melanogaster (Fruit fly) PE=1 SV=2	PREDICTED: uncharacterized protein LOC105342521 [Crassostrea gigas]
TR29815_c1_g1	--	--	--	K01090|2e-54|cqu:CpipJ_CPIJ017206|phosphatase 2C gamma	[T]	Signal transduction mechanisms	Protein phosphatase 2C	Probable protein phosphatase CG10417 GN=CG10417 OS=Drosophila melanogaster (Fruit fly) PE=1 SV=1	PREDICTED: protein phosphatase 1G-like isoform X2 [Crassostrea gigas]
TR53990_c0_g1	[TZDR]	--	Molecular Function: calcium ion binding (GO:0005509);;	--	[T]	Signal transduction mechanisms	EF hand;; EF-hand domain	Calcium-binding protein B GN=cbpB OS=Dictyostelium discoideum (Slime mold) PE=3 SV=1	allograft inflammatory factor [Ruditapes philippinarum]
TR14366_c0_g1	[IQR]	--	Biological Process: metabolic process (GO:0008152);;	K11163|1e-126|spu:592990|similar to Dehydrogenase/reductase (SDR family) member 1	[R]	General function prediction only	short chain dehydrogenase;; Enoyl-(Acyl carrier protein) reductase;; KR domain	Uncharacterized oxidoreductase F53C11.3 GN=F53C11.3 OS=Caenorhabditis elegans PE=3 SV=1	PREDICTED: dehydrogenase/reductase SDR family member 1 [Strongylocentrotus purpuratus]
TR47579_c0_g1	--	--	--	--	--	--	--	--	PREDICTED: uncharacterized protein LOC105347841 [Crassostrea gigas]
TR48518_c0_g1	--	--	--	--	[R]	General function prediction only	Immunoglobulin domain;; Immunoglobulin domain;; Immunoglobulin domain;; Immunoglobulin I-set domain	Fibronectin type III domain-containing protein (Precursor) OS=Acropora millepora (Staghorn coral) PE=1 SV=1	hypothetical protein LOTGIDRAFT_174458 [Lottia gigantea]
TR36887_c0_g1	[UR]	--	Molecular Function: protein kinase activity (GO:0004672);; Molecular Function: ATP binding (GO:0005524);; Biological Process: protein phosphorylation (GO:0006468);; Molecular Function: phosphatidylinositol binding (GO:0035091);;	--	[ZUD]	--	PX domain	--	PREDICTED: ribosomal protein S6 kinase delta-1-like isoform X1 [Crassostrea gigas]
TR22185_c0_g1	[G]	Carbohydrate transport and metabolism	--	--	[G]	Carbohydrate transport and metabolism	Major intrinsic protein	Aquaporin AQPAe.a GN=AAEL003512 OS=Aedes aegypti (Yellowfever mosquito) PE=2 SV=2	PREDICTED: aquaporin-1-like [Crassostrea gigas]
TR28725_c0_g1	[E]	Amino acid transport and metabolism	--	--	[E]	Amino acid transport and metabolism	Aminotransferase class-V;; Aminotransferase class I and II;; DegT/DnrJ/EryC1/StrS aminotransferase family;; Cys/Met metabolism PLP-dependent enzyme	Probable cysteine desulfurase, mitochondrial (Precursor) GN=nfs1 OS=Dictyostelium discoideum (Slime mold) PE=1 SV=1	hypothetical protein LOTGIDRAFT_176332 [Lottia gigantea]
TR17415_c0_g1	--	--	--	--	--	--	--	Histone-lysine N-methyltransferase, H3 lysine-79 specific {ECO:0000303|PubMed:21187070} OS=Dictyostelium discoideum (Slime mold) PE=2 SV=2	PH domain containing protein [Trichomonas vaginalis G3]
TR47611_c0_g1	--	--	Molecular Function: catalytic activity (GO:0003824);;	K01565|2e-41|bfo:BRAFLDRAFT_118993|hypothetical protein	[R]	General function prediction only	--	--	hypothetical protein LOTGIDRAFT_228392 [Lottia gigantea]
TR15492_c0_g1	[RTKL]	--	Molecular Function: ATP binding (GO:0005524);; Biological Process: protein phosphorylation (GO:0006468);; Molecular Function: N-acetyltransferase activity (GO:0008080);; Molecular Function: RNA polymerase II carboxy-terminal domain kinase activity (GO:0008353);; Biological Process: regulation of signal transduction (GO:0009966);;	K08824|1e-111|gga:428001|CDKL5	[R]	General function prediction only	Protein kinase domain;; Protein tyrosine kinase	Cyclin-dependent kinase 5 homolog GN=cdk5 OS=Dictyostelium discoideum (Slime mold) PE=2 SV=2	hypothetical protein LOTGIDRAFT_213120 [Lottia gigantea]
TR52789_c0_g2	--	--	--	--	--	--	TNF(Tumour Necrosis Factor) family	--	PREDICTED: CD40 ligand-like [Crassostrea gigas]
TR43306_c0_g1	--	--	--	--	--	--	Mib_herc2	--	PREDICTED: uncharacterized protein LOC105328215 [Crassostrea gigas]
TR40937_c0_g2	--	--	--	--	--	--	--	--	hypothetical protein BRAFLDRAFT_90411 [Branchiostoma floridae]
TR37739_c0_g1	--	--	--	--	--	--	--	Uncharacterized protein K04H4.2 (Precursor) GN=K04H4.2 OS=Caenorhabditis elegans PE=3 SV=8	hypothetical protein CAPTEDRAFT_228963 [Capitella teleta]
TR51606_c0_g2	--	--	--	--	--	--	Membrane-associating domain	--	PREDICTED: synaptophysin-like protein 1 isoform X2 [Crassostrea gigas]
TR19706_c0_g1	--	--	--	--	--	--	--	--	PREDICTED: uncharacterized protein LOC105348495 [Crassostrea gigas]
TR51601_c0_g1	--	--	Biological Process: cellular process (GO:0009987);; Biological Process: macromolecule metabolic process (GO:0043170);; Biological Process: primary metabolic process (GO:0044238);;	--	[S]	Function unknown	Cadherin domain;; EGF-like domain	Protocadherin-like protein {ECO:0000303|PubMed:23765379} (Precursor) OS=Acropora millepora (Staghorn coral) PE=1 SV=1	PREDICTED: protocadherin Fat 4-like [Aplysia californica]
TR31235_c0_g1	--	--	--	--	--	--	--	--	PREDICTED: uncharacterized protein LOC101861083 [Aplysia californica]
TR30492_c0_g1	--	--	--	K13163|1e-71|bfo:BRAFLDRAFT_130981|hypothetical protein	--	--	TIR domain	--	PREDICTED: uncharacterized protein LOC105337448 [Crassostrea gigas]
TR57417_c3_g3	--	--	--	--	[I]	Lipid transport and metabolism	Lipocalin / cytosolic fatty-acid binding protein family	Fatty acid-binding protein OS=Schistosoma japonicum (Blood fluke) PE=1 SV=1	PREDICTED: fatty acid-binding protein, heart-like isoform X1 [Crassostrea gigas]
TR47588_c0_g1	--	--	Molecular Function: catalytic activity (GO:0003824);;	--	--	--	--	Calponin homology domain-containing protein DDB_G0272472 GN=DDB_G0272472 OS=Dictyostelium discoideum (Slime mold) PE=3 SV=1	PREDICTED: titin-like [Apis mellifera]
TR38481_c0_g1	[R]	General function prediction only	--	--	[R]	General function prediction only	Tetratricopeptide repeat;; Homodimerisation domain of SGTA;; Tetratricopeptide repeat;; TPR repeat;; Tetratricopeptide repeat;; Tetratricopeptide repeat;; Tetratricopeptide repeat;; Tetratricopeptide repeat;; Tetratricopeptide repeat;; Plant specific mitochondrial import receptor subunit TOM20	Small glutamine-rich tetratricopeptide repeat-containing protein GN=sgt OS=Dictyostelium discoideum (Slime mold) PE=1 SV=1	PREDICTED: small glutamine-rich tetratricopeptide repeat-containing protein beta-like [Crassostrea gigas]
TR44362_c0_g1	--	--	--	--	--	--	--	--	hypothetical protein CGI_10002868 [Crassostrea gigas]
TR21334_c0_g1	--	--	--	--	[K]	Transcription	CUE domain	Activating signal cointegrator 1 complex subunit 2 homolog GN=ascc2 OS=Dictyostelium discoideum (Slime mold) PE=3 SV=2	PREDICTED: activating signal cointegrator 1 complex subunit 2-like [Crassostrea gigas]
TR29845_c0_g1	--	--	--	--	[T]	Signal transduction mechanisms	LNR domain;; Immunoglobulin V-set domain;; Immunoglobulin I-set domain;; Immunoglobulin domain	Processed neurogenic locus Notch protein (Precursor) GN=N OS=Drosophila melanogaster (Fruit fly) PE=1 SV=3	PREDICTED: multiple epidermal growth factor-like domains protein 10 [Crassostrea gigas]
TR35234_c0_g1	--	--	Molecular Function: transcription factor activity, sequence-specific DNA binding (GO:0003700);; Biological Process: regulation of transcription, DNA-templated (GO:0006355);; Molecular Function: sequence-specific DNA binding (GO:0043565);;	--	[K]	Transcription	Basic region leucine zipper	Cell death specification protein 2 GN=ces-2 OS=Caenorhabditis elegans PE=1 SV=1	PREDICTED: D site-binding protein-like isoform X2 [Crassostrea gigas]
TR57838_c0_g1	--	--	--	--	[S]	Function unknown	Otopetrin	--	PREDICTED: otopetrin-2-like [Crassostrea gigas]
TR58107_c0_g2	[I]	Lipid transport and metabolism	--	K01080|4e-34|tca:659825|similar to CG8804-PA, isoform A	[I]	Lipid transport and metabolism	PAP2 superfamily	Putative phosphatidate phosphatase GN=wun OS=Drosophila melanogaster (Fruit fly) PE=1 SV=2	hypothetical protein LOTGIDRAFT_137546 [Lottia gigantea]
TR23987_c0_g1	--	--	Molecular Function: nuclease activity (GO:0004518);; Biological Process: cellular process (GO:0009987);;	--	--	--	--	--	hypothetical protein LOTGIDRAFT_155770 [Lottia gigantea]
TR10698_c0_g1	--	--	Biological Process: cellular protein modification process (GO:0006464);;	--	[O]	Posttranslational modification, protein turnover, chaperones	Tubulin-tyrosine ligase family	Probable alpha-tubulin polyglutamylase Ttll1 GN=Ttll1 OS=Tetrahymena thermophila (strain SB210) PE=3 SV=1	PREDICTED: probable tubulin polyglutamylase TTLL9 [Crassostrea gigas]
TR38735_c0_g1	--	--	Cellular Component: membrane (GO:0016020);;	--	[U]	Intracellular trafficking, secretion, and vesicular transport	Tim17/Tim22/Tim23/Pmp24 family	Mitochondrial import inner membrane translocase subunit tim-22 GN=tim-22 OS=Caenorhabditis elegans PE=3 SV=1	PREDICTED: mitochondrial import inner membrane translocase subunit Tim22-like [Aplysia californica]
TR1639_c0_g1	--	--	--	--	[R]	General function prediction only	--	Zinc finger protein 1 GN=zfh1 OS=Drosophila melanogaster (Fruit fly) PE=1 SV=2	zinc finger protein 574 [Clonorchis sinensis]
TR51394_c0_g1	--	--	--	--	--	--	--	Uncharacterized protein DDB_G0271670 (Precursor) GN=DDB_G0271670 OS=Dictyostelium discoideum (Slime mold) PE=3 SV=1	--
TR2088_c1_g1	--	--	--	--	--	--	--	--	PREDICTED: E3 ubiquitin-protein ligase RNF213-like [Crassostrea gigas]
TR37609_c0_g1	--	--	Molecular Function: carbohydrate binding (GO:0030246);;	K06560|2e-07|gga:420515|similar to mannose receptor	--	--	Lectin C-type domain	--	C-type lectin [Meretrix meretrix]
TR5048_c0_g1	--	--	Molecular Function: catalytic activity (GO:0003824);; Molecular Function: binding (GO:0005488);;	--	[GO]	--	WSC domain;; EGF-like domain	Xylosyltransferase oxt GN=oxt OS=Drosophila pseudoobscura pseudoobscura (Fruit fly) PE=2 SV=1	hypothetical protein CAPTEDRAFT_195285, partial [Capitella teleta]
TR30818_c0_g1	--	--	--	--	--	--	DDE superfamily endonuclease	--	PREDICTED: uncharacterized protein LOC105338516 [Crassostrea gigas]
TR48105_c0_g3	--	--	--	K06483|1e-66|ssc:100521477|ITGA4	[W]	Extracellular structures	Integrin alpha;; FG-GAP repeat;; FG-GAP repeat	Integrin alpha-PS1 light chain (Precursor) GN=mew OS=Drosophila melanogaster (Fruit fly) PE=1 SV=2	PREDICTED: integrin alpha-8-like [Crassostrea gigas]
TR51224_c0_g1	--	--	--	K05765|3e-18|tca:656560|similar to Cofilin/actin-depolymerizing factor homolog (D61 protein) (Twinstar protein)	[Z]	Cytoskeleton	Cofilin/tropomyosin-type actin-binding protein	Actophorin OS=Acanthamoeba castellanii (Amoeba) PE=1 SV=2	Actophorin, putative [Perkinsus marinus ATCC 50983]
TR53214_c1_g1	--	--	--	--	--	--	--	--	Sacsin [Crassostrea gigas]
TR26064_c0_g1	--	--	Cellular Component: nucleus (GO:0005634);; Biological Process: regulation of transcription, DNA-templated (GO:0006355);; Molecular Function: hydrolase activity (GO:0016787);; Molecular Function: sequence-specific DNA binding (GO:0043565);;	K08029|1e-67|spu:579092|NK2.2	[K]	Transcription	Homeobox domain	Homeobox protein vnd GN=vnd OS=Drosophila melanogaster (Fruit fly) PE=1 SV=3	PREDICTED: homeobox protein Nkx-2.2a-like [Crassostrea gigas]
TR50714_c1_g1	--	--	--	--	--	--	--	--	PREDICTED: uncharacterized protein LOC101242368 [Ciona intestinalis]
TR55521_c0_g1	--	--	--	--	--	--	--	Location of vulva defective 1 (Precursor) GN=lov-1 OS=Caenorhabditis elegans PE=1 SV=4	hypothetical protein M513_08078, partial [Trichuris suis]
TR6508_c0_g1	--	--	--	--	--	--	--	--	Protocadherin-11 X-linked [Crassostrea gigas]
TR48789_c0_g1	[O]	Posttranslational modification, protein turnover, chaperones	--	--	[O]	Posttranslational modification, protein turnover, chaperones	TCP-1/cpn60 chaperonin family	--	hypothetical protein LOTGIDRAFT_169741 [Lottia gigantea]
TR53368_c0_g1	--	--	Molecular Function: binding (GO:0005488);;	K09186|6e-24|tgu:100231049|MLL	[K]	Transcription	CXXC zinc finger domain	JmjC domain-containing histone demethylation protein 1 GN=Kdm2 OS=Drosophila melanogaster (Fruit fly) PE=1 SV=2	PREDICTED: histone-lysine N-methyltransferase 2A-like [Crassostrea gigas]
TR25897_c0_g1	--	--	--	--	--	--	--	--	aaa family atpase [Eimeria tenella strain Houghton]
TR36515_c0_g1	--	--	--	--	[O]	Posttranslational modification, protein turnover, chaperones	Phage integrase, N-terminal SAM-like domain	Heat shock 70 kDa protein cognate 4 OS=Manduca sexta (Tobacco hawkmoth) PE=2 SV=1	PREDICTED: uncharacterized protein LOC105556126 [Vollenhovia emeryi]
TR26888_c3_g1	--	--	--	--	--	--	C2H2-type zinc finger	--	--
TR16142_c0_g1	--	--	Molecular Function: binding (GO:0005488);;	--	[B]	Chromatin structure and dynamics	--	Nucleolar protein 58 GN=nop58 OS=Dictyostelium discoideum (Slime mold) PE=3 SV=1	ABC transporter, putative [Perkinsus marinus ATCC 50983]
TR36061_c0_g1	--	--	--	--	--	--	--	--	PREDICTED: uncharacterized protein LOC105320831 [Crassostrea gigas]
TR27976_c0_g1	--	--	--	--	--	--	Domain of unknown function (DUF4773)	--	hypothetical protein CGI_10028476 [Crassostrea gigas]
TR48699_c3_g1	[L]	Replication, recombination and repair	Molecular Function: organic cyclic compound binding (GO:0097159);; Molecular Function: heterocyclic compound binding (GO:1901363);;	K07478|0.0|dre:405856|MGC85976	[L]	Replication, recombination and repair	MgsA AAA+ ATPase C terminal;; AAA C-terminal domain;; Holliday junction DNA helicase ruvB N-terminus;; ATPase family associated with various cellular activities (AAA);; AAA domain (dynein-related subfamily);; AAA domain;; Sigma-54 interaction domain;; Magnesium chelatase, subunit ChlI;; AAA domain (Cdc48 subfamily);; Rad17 cell cycle checkpoint protein	ATPase WRNIP1 {ECO:0000250|UniProtKB:Q96S55} OS=Dictyostelium discoideum (Slime mold) PE=3 SV=1	hypothetical protein LOTGIDRAFT_236835 [Lottia gigantea]
TR18814_c0_g1	--	--	--	--	--	--	Thioredoxin	--	PREDICTED: uncharacterized protein LOC105341287 [Crassostrea gigas]
TR2418_c0_g1	--	--	--	--	--	--	Zinc-finger double-stranded RNA-binding	--	hypothetical protein LOTGIDRAFT_163229 [Lottia gigantea]
TR2314_c0_g1	--	--	--	--	--	--	--	--	PREDICTED: PH domain leucine-rich repeat-containing protein phosphatase 2-like isoform X3 [Crassostrea gigas]
TR6172_c0_g1	--	--	Molecular Function: signal transducer activity (GO:0004871);; Biological Process: signal transduction (GO:0007165);;	K04225|2e-08|aga:AgaP_AGAP001592|GPRTAK2	--	--	Serpentine type 7TM GPCR chemoreceptor Srw	--	PREDICTED: probable G-protein coupled receptor 52 [Crassostrea gigas]
TR24496_c0_g1	[R]	General function prediction only	--	--	[S]	Function unknown	WD domain, G-beta repeat	Lissencephaly-1 homolog {ECO:0000255|HAMAP-Rule:MF_03141} GN=BRAFLDRAFT_59218 OS=Branchiostoma floridae (Florida lancelet) PE=3 SV=1	WD repeat-containing protein 67 [Crassostrea gigas]
TR8188_c0_g1	--	--	Cellular Component: membrane (GO:0016020);;	--	[W]	Extracellular structures	Integrin alpha;; FG-GAP repeat;; FG-GAP repeat;; Repeat domain in Vibrio, Colwellia, Bradyrhizobium and Shewanella	Integrin alpha-PS2 light chain (Precursor) GN=if OS=Drosophila melanogaster (Fruit fly) PE=1 SV=2	hypothetical protein LOTGIDRAFT_239025 [Lottia gigantea]
TR29056_c0_g1	--	--	--	--	--	--	Protein of unknown function (DUF2723)	Transmembrane protein 260 homolog GN=DDB_G0275853 OS=Dictyostelium discoideum (Slime mold) PE=3 SV=2	PREDICTED: transmembrane protein 260-like [Aplysia californica]
TR20781_c0_g1	--	--	--	K13114|6e-73|mdo:100024467|similar to Calpain 1, (mu/I) large subunit	[Z]	Cytoskeleton	pinin/SDK/memA/ protein conserved region;; pinin/SDK conserved region	Uncharacterized protein DDB_G0283697 GN=DDB_G0283697 OS=Dictyostelium discoideum (Slime mold) PE=4 SV=1	PREDICTED: pinin-like [Crassostrea gigas]
TR21636_c0_g1	--	--	--	--	--	--	--	--	PREDICTED: armadillo repeat-containing protein 1-like [Crassostrea gigas]
TR23598_c0_g1	--	--	--	--	--	--	--	--	PREDICTED: uncharacterized protein LOC105342521 [Crassostrea gigas]
TR49922_c0_g1	--	--	--	--	--	--	--	--	PREDICTED: uncharacterized protein LOC105338516 [Crassostrea gigas]
TR8994_c3_g4	[U]	Intracellular trafficking, secretion, and vesicular transport	--	K09540|0.0|bfo:BRAFLDRAFT_284846|hypothetical protein	[UO]	--	Sec63 Brl domain;; DnaJ domain	Putative U5 small nuclear ribonucleoprotein 200 kDa helicase GN=l(3)72Ab OS=Drosophila melanogaster (Fruit fly) PE=2 SV=4	PREDICTED: translocation protein SEC63 homolog [Crassostrea gigas]
TR7015_c0_g1	--	--	Molecular Function: transcription factor activity, sequence-specific DNA binding (GO:0003700);; Molecular Function: transcription coactivator activity (GO:0003713);; Biological Process: regulation of transcription, DNA-templated (GO:0006355);; Molecular Function: sequence-specific DNA binding (GO:0043565);;	--	--	--	--	C-Myc-binding protein homolog GN=mycbp OS=Dictyostelium discoideum (Slime mold) PE=3 SV=1	hypothetical protein BRAFLDRAFT_115113 [Branchiostoma floridae]
TR54043_c0_g1	--	--	--	--	--	--	AIG1 family;; 50S ribosome-binding GTPase	--	hypothetical protein LOTGIDRAFT_195901, partial [Lottia gigantea]
TR3828_c0_g2	--	--	Biological Process: MAPK cascade (GO:0000165);; Molecular Function: protein serine/threonine kinase activity (GO:0004674);; Biological Process: protein phosphorylation (GO:0006468);;	K04422|6e-12|mcc:701085|mitogen-activated protein kinase kinase kinase 13-like	[T]	Signal transduction mechanisms	--	--	Mitogen-activated protein kinase kinase kinase 13-B [Crassostrea gigas]
TR29369_c1_g1	--	--	--	--	--	--	--	DNA ligase 1 GN=lig1 OS=Dictyostelium discoideum (Slime mold) PE=3 SV=1	hypothetical protein BRAFLDRAFT_69589 [Branchiostoma floridae]
TR45141_c1_g1	--	--	--	--	--	--	--	--	PREDICTED: uncharacterized protein LOC105346060 [Crassostrea gigas]
TR54529_c1_g1	--	--	--	--	[T]	Signal transduction mechanisms	EF-hand domain;; EF hand;; EF-hand domain pair;; EF-hand domain pair;; EF hand;; Secreted protein acidic and rich in cysteine Ca binding region	16 kDa calcium-binding protein OS=Schistosoma mansoni (Blood fluke) PE=2 SV=1	hypothetical protein CAPTEDRAFT_164457 [Capitella teleta]
TR45892_c1_g1	[CE]	--	Molecular Function: magnesium ion binding (GO:0000287);; Molecular Function: isocitrate dehydrogenase (NAD+) activity (GO:0004449);; Cellular Component: mitochondrial matrix (GO:0005759);; Cellular Component: lipid droplet (GO:0005811);; Cellular Component: microtubule associated complex (GO:0005875);; Biological Process: tricarboxylic acid cycle (GO:0006099);; Molecular Function: NAD binding (GO…	K00030|0.0|tca:658559|similar to isocitrate dehydrogenase	[E]	Amino acid transport and metabolism	Isocitrate/isopropylmalate dehydrogenase	Probable isocitrate dehydrogenase [NAD] subunit alpha, mitochondrial (Precursor) GN=l(1)G0156 OS=Drosophila melanogaster (Fruit fly) PE=2 SV=1	PREDICTED: probable isocitrate dehydrogenase [NAD] subunit alpha, mitochondrial-like isoform X1 [Aplysia californica]
TR37781_c0_g1	--	--	Molecular Function: calcium ion binding (GO:0005509);;	--	--	--	EF-hand domain;; EF hand;; EF-hand domain pair	Sarcoplasmic calcium-binding protein OS=Mizuhopecten yessoensis (Japanese scallop) PE=1 SV=1	sarcoplasmic calcium binding protein [Ruditapes philippinarum]
TR49702_c1_g2	--	--	--	--	--	--	--	--	PREDICTED: uncharacterized protein LOC105340013 [Crassostrea gigas]
TR26815_c2_g2	--	--	--	--	--	--	Domain of unknown function (DUF4773)	--	hypothetical protein CGI_10001848 [Crassostrea gigas]
TR21109_c0_g1	[TZDR]	--	Molecular Function: calcium ion binding (GO:0005509);;	K02183|9e-59|gga:396523|CALM1	[T]	Signal transduction mechanisms	EF hand;; EF-hand domain pair;; EF-hand domain;; EF-hand domain pair;; EF hand;; EF-hand domain;; Cytoskeletal-regulatory complex EF hand;; Secreted protein acidic and rich in cysteine Ca binding region;; Ca2+ insensitive EF hand;; EF-hand domain	Calmodulin OS=Renilla reniformis (Sea pansy) PE=1 SV=2	PREDICTED: neo-calmodulin-like isoform X1 [Crassostrea gigas]
TR7357_c0_g1	[R]	General function prediction only	Molecular Function: neurotransmitter:sodium symporter activity (GO:0005328);; Biological Process: neurotransmitter transport (GO:0006836);; Cellular Component: integral component of membrane (GO:0016021);; Biological Process: transmembrane transport (GO:0055085);;	K05046|3e-39|gga:418147|SLC6A13	[T]	Signal transduction mechanisms	Sodium:neurotransmitter symporter family	Sodium- and chloride-dependent GABA transporter ine OS=Drosophila melanogaster (Fruit fly) PE=1 SV=1	Sodium- and chloride-dependent glycine transporter 2 [Crassostrea gigas]
TR23428_c0_g1	[RTKL]	--	Molecular Function: protein serine/threonine kinase activity (GO:0004674);; Molecular Function: ATP binding (GO:0005524);; Biological Process: protein phosphorylation (GO:0006468);; Biological Process: regulation of signal transduction (GO:0009966);;	--	[T]	Signal transduction mechanisms	Protein kinase domain;; Protein tyrosine kinase;; P21-Rho-binding domain	Serine/threonine-protein kinase pak-1 GN=pak-1 OS=Caenorhabditis elegans PE=1 SV=2	PREDICTED: serine/threonine-protein kinase PAK 1-like isoform X4 [Crassostrea gigas]
TR6306_c0_g1	--	--	--	K08883|6e-13|aga:AgaP_AGAP001328|AGAP001328-PA	[O]	Posttranslational modification, protein turnover, chaperones	B-box zinc finger	--	Tripartite motif-containing protein 3 [Crassostrea gigas]
TR21143_c0_g1	--	--	--	K11861|0.0|dre:570582|hypothetical LOC570582	[T]	Signal transduction mechanisms	--	--	PREDICTED: deubiquitinating protein VCIP135-like [Crassostrea gigas]
TR2115_c0_g1	--	--	--	--	[P]	Inorganic ion transport and metabolism	--	--	hypothetical protein HELRODRAFT_90253 [Helobdella robusta]
TR39490_c0_g1	--	--	--	--	[MW]	--	Fasciclin domain	--	PREDICTED: periostin-like [Crassostrea gigas]
TR31948_c5_g17	--	--	--	K03989|2e-08|bfo:BRAFLDRAFT_129974|hypothetical protein	--	--	UNC-6/NTR/C345C module	--	complement component C3 [Ruditapes decussatus]
TR2310_c0_g1	--	--	Molecular Function: hydrolase activity (GO:0016787);;	K06704|4e-25|nvi:100117425|NV13865	[W]	Extracellular structures	--	--	PREDICTED: disintegrin and metalloproteinase domain-containing protein 10-like [Crassostrea gigas]
TR44206_c0_g2	--	--	Molecular Function: DNA binding (GO:0003677);; Molecular Function: microtubule motor activity (GO:0003777);; Molecular Function: ATP binding (GO:0005524);; Biological Process: microtubule-based movement (GO:0007018);; Biological Process: cell cycle (GO:0007049);; Biological Process: chromosome segregation (GO:0007059);; Biological Process: metabolic process (GO:0008152);; Cellular Component: inte…	--	[Z]	Cytoskeleton	P-loop containing dynein motor region D4	Dynein beta chain, ciliary OS=Heliocidaris crassispina (Sea urchin) PE=1 SV=1	Dynein beta chain, ciliary [Crassostrea gigas]
TR25887_c2_g1	--	--	--	--	--	--	Centriole duplication and mitotic chromosome congression	Probable basic-leucine zipper transcription factor N GN=bzpN OS=Dictyostelium discoideum (Slime mold) PE=3 SV=1	Coiled-coil domain-containing protein 52 [Crassostrea gigas]
TR53294_c0_g1	--	--	--	K13517|3e-90|ame:552342|similar to CG18445-PA	[S]	Function unknown	MBOAT, membrane-bound O-acyltransferase family	Lysophospholipid acyltransferase 5 OS=Drosophila melanogaster (Fruit fly) PE=1 SV=1	PREDICTED: membrane-bound O-acyltransferase domain-containing protein 2-like isoform X2 [Crassostrea gigas]
TR9825_c0_g2	[IQR]	--	Biological Process: metabolic process (GO:0008152);; Molecular Function: oxidoreductase activity (GO:0016491);; Biological Process: biological_process (GO:0044699);;	--	[R]	General function prediction only	short chain dehydrogenase;; Enoyl-(Acyl carrier protein) reductase	Farnesol dehydrogenase {ECO:0000305} OS=Aedes aegypti (Yellowfever mosquito) PE=1 SV=2	PREDICTED: uncharacterized oxidoreductase C663.09c-like [Aplysia californica]
TR29519_c1_g1	--	--	--	--	--	--	--	--	hypothetical protein CGI_10026724 [Crassostrea gigas]
TR43122_c0_g1	[IQR]	--	--	K03331|1e-80|dre:550282|dcxr, wu:fa12f09, zgc:111977	[Q]	Secondary metabolites biosynthesis, transport and catabolism	Enoyl-(Acyl carrier protein) reductase;; short chain dehydrogenase;; KR domain;; NAD dependent epimerase/dehydratase family	L-xylulose reductase {ECO:0000250|UniProtKB:Q7Z4W1} OS=Caenorhabditis elegans PE=1 SV=2	PREDICTED: l-xylulose reductase-like [Bombus terrestris]
TR14701_c0_g3	--	--	Biological Process: intra-Golgi vesicle-mediated transport (GO:0006891);; Cellular Component: Golgi transport complex (GO:0017119);;	--	[S]	Function unknown	Conserved oligomeric complex COG6	--	hypothetical protein LOTGIDRAFT_209569 [Lottia gigantea]
TR21226_c0_g1	--	--	--	--	--	--	--	--	PREDICTED: uncharacterized protein LOC105319567 [Crassostrea gigas]
TR29824_c0_g1	--	--	Molecular Function: binding (GO:0005488);;	K14649|1e-82|bfo:BRAFLDRAFT_214741|hypothetical protein	[K]	Transcription	Bromodomain associated;; Transcription factor TFIID complex subunit 8 C-term	Transcription initiation factor TFIID subunit 8 OS=Drosophila melanogaster (Fruit fly) PE=1 SV=1	Transcription initiation factor TFIID subunit 8 [Crassostrea gigas]
TR46219_c0_g1	--	--	--	--	[R]	General function prediction only	RPEL repeat	General transcriptional corepressor trfA GN=trfA OS=Dictyostelium discoideum (Slime mold) PE=2 SV=1	PREDICTED: phosphatase and actin regulator 1-like isoform X1 [Crassostrea gigas]
TR48896_c0_g1	--	--	--	--	--	--	DDE superfamily endonuclease;; Transposase DDE domain	--	PREDICTED: uncharacterized protein LOC105343063 [Crassostrea gigas]
TR16396_c0_g1	--	--	--	--	[R]	General function prediction only	Reverse transcriptase (RNA-dependent DNA polymerase)	Probable RNA-directed DNA polymerase from transposon BS OS=Drosophila melanogaster (Fruit fly) PE=2 SV=1	PREDICTED: uncharacterized protein LOC102810040 [Saccoglossus kowalevskii]
TR16083_c0_g1	--	--	--	--	--	--	--	--	fam-b protein [Plasmodium yoelii]
TR37503_c0_g1	--	--	--	K12162|1e-49|bta:530547|UFM1, MGC127692	[S]	Function unknown	Ubiquitin fold modifier 1 protein	Ubiquitin-fold modifier 1 (Precursor) GN=tag-277 OS=Caenorhabditis elegans PE=1 SV=1	PREDICTED: ubiquitin-fold modifier 1-like isoform X1 [Saccoglossus kowalevskii]
TR55270_c0_g2	--	--	--	--	[S]	Function unknown	Cadherin domain	Fat-like cadherin-related tumor suppressor homolog (Precursor) GN=kug OS=Drosophila melanogaster (Fruit fly) PE=2 SV=3	PREDICTED: protocadherin beta-3-like [Crassostrea gigas]
TR56783_c0_g1	[L]	Replication, recombination and repair	--	K02321|1e-167|nve:NEMVE_v1g166478|hypothetical protein	[L]	Replication, recombination and repair	DNA polymerase alpha/epsilon subunit B;; DNA polymerase alpha subunit B N-terminal	DNA polymerase alpha subunit B GN=div-1 OS=Caenorhabditis elegans PE=3 SV=3	PREDICTED: DNA polymerase alpha subunit B-like [Crassostrea gigas]
TR43753_c2_g1	--	--	--	--	[R]	General function prediction only	Reverse transcriptase (RNA-dependent DNA polymerase)	Endonuclease GN=pol OS=Drosophila melanogaster (Fruit fly) PE=3 SV=1	PREDICTED: uncharacterized protein LOC102810040 [Saccoglossus kowalevskii]
TR56644_c0_g1	--	--	--	--	--	--	C1q domain	Heavy metal-binding protein HIP OS=Mytilus edulis (Blue mussel) PE=1 SV=1	PREDICTED: multimerin-2-like [Crassostrea gigas]
TR22282_c0_g1	[Q]	Secondary metabolites biosynthesis, transport and catabolism	Molecular Function: monooxygenase activity (GO:0004497);; Molecular Function: iron ion binding (GO:0005506);; Molecular Function: oxidoreductase activity, acting on paired donors, with incorporation or reduction of molecular oxygen (GO:0016705);; Molecular Function: heme binding (GO:0020037);; Biological Process: oxidation-reduction process (GO:0055114);;	K07424|1e-109|bta:526682|CYP3A5	[Q]	Secondary metabolites biosynthesis, transport and catabolism	Cytochrome P450	Cytochrome P450 9e2 GN=CYP9E2 OS=Blattella germanica (German cockroach) PE=2 SV=1	cytochrome P450 30 [Mercenaria mercenaria]
TR14699_c1_g1	--	--	--	--	--	--	--	--	hypothetical protein LOTGIDRAFT_154713 [Lottia gigantea]
TR41079_c0_g1	--	--	--	--	[Y]	Nuclear structure	DNA-directed RNA polymerase I subunit RPA34.5	UPF0396 protein GN=DDB_G0269284 OS=Dictyostelium discoideum (Slime mold) PE=3 SV=1	PREDICTED: uncharacterized protein LOC105322903 [Crassostrea gigas]
TR28299_c1_g1	[RTKL]	--	Biological Process: MAPK cascade (GO:0000165);; Molecular Function: MAP kinase activity (GO:0004707);; Molecular Function: ATP binding (GO:0005524);; Biological Process: protein phosphorylation (GO:0006468);;	K04371|0.0|tca:655225|similar to extracellular signal-regulated kinase	[T]	Signal transduction mechanisms	Protein kinase domain;; Protein tyrosine kinase	Mitogen-activated protein kinase ERK-A GN=rl OS=Drosophila melanogaster (Fruit fly) PE=1 SV=3	hypothetical protein LOTGIDRAFT_231535 [Lottia gigantea]
TR17349_c3_g1	--	--	--	--	--	--	Mab-21 protein	--	PREDICTED: uncharacterized protein LOC105319054 [Crassostrea gigas]
TR34391_c2_g1	--	--	--	K14316|2e-08|ssc:100512219|POM121C	--	--	--	--	PREDICTED: nuclear envelope pore membrane protein POM 121-like isoform X2 [Crassostrea gigas]
TR54400_c1_g1	--	--	--	--	[R]	General function prediction only	C-terminal of Roc, COR, domain;; Ras of Complex, Roc, domain of DAPkinase;; Ras family	Probable serine/threonine-protein kinase pats1 GN=pats1 OS=Dictyostelium discoideum (Slime mold) PE=3 SV=1	PREDICTED: malignant fibrous histiocytoma-amplified sequence 1 homolog [Aplysia californica]
TR44537_c0_g1	[P]	Inorganic ion transport and metabolism	Molecular Function: ferroxidase activity (GO:0004322);; Biological Process: iron ion transport (GO:0006826);; Biological Process: cellular iron ion homeostasis (GO:0006879);; Molecular Function: ferric iron binding (GO:0008199);; Biological Process: oxidation-reduction process (GO:0055114);;	K00522|2e-89|bfo:BRAFLDRAFT_114663|hypothetical protein	[P]	Inorganic ion transport and metabolism	Ferritin-like domain;; Rubrerythrin	Soma ferritin OS=Lymnaea stagnalis (Great pond snail) PE=2 SV=2	ferritin H-like subunit [Ruditapes philippinarum]
TR17881_c1_g1	--	--	--	--	[R]	General function prediction only	SET domain	--	hypothetical protein LOTGIDRAFT_210687 [Lottia gigantea]
TR17672_c0_g2	--	--	--	--	--	--	--	--	PREDICTED: uncharacterized protein LOC105333082 [Crassostrea gigas]
TR55329_c0_g1	[T]	Signal transduction mechanisms	Molecular Function: protein kinase activity (GO:0004672);; Biological Process: phosphorylation (GO:0016310);;	K08851|3e-77|xla:734558|tp53rk, MGC115438	[R]	General function prediction only	Lipopolysaccharide kinase (Kdo/WaaP) family;; Protein kinase domain;; Protein tyrosine kinase;; RIO1 family	EKC/KEOPS complex subunit bud32 GN=bud32 OS=Dictyostelium discoideum (Slime mold) PE=3 SV=1	PREDICTED: TP53-regulating kinase-like [Crassostrea gigas]
TR50646_c0_g1	--	--	Cellular Component: anaphase-promoting complex (GO:0005680);; Biological Process: regulation of mitotic cell cycle spindle assembly checkpoint (GO:0090266);;	--	--	--	Anaphase-promoting complex subunit 15	Uncharacterized protein DDB_G0271670 (Precursor) GN=DDB_G0271670 OS=Dictyostelium discoideum (Slime mold) PE=3 SV=1	PREDICTED: anaphase-promoting complex subunit 15-like [Crassostrea gigas]
TR25719_c0_g1	[O]	Posttranslational modification, protein turnover, chaperones	Molecular Function: DNA binding (GO:0003677);; Molecular Function: DNA-directed 5'-3' RNA polymerase activity (GO:0003899);; Biological Process: transcription, DNA-templated (GO:0006351);;	K07393|1e-22|bfo:BRAFLDRAFT_122160|hypothetical protein	[O]	Posttranslational modification, protein turnover, chaperones	Glutathione S-transferase, N-terminal domain	--	PREDICTED: glutathione S-transferase omega-like 2 [Amphimedon queenslandica]
TR3723_c0_g1	[I]	Lipid transport and metabolism	--	--	[R]	General function prediction only	Carboxylesterase family	Acetylcholinesterase-1 (Precursor) OS=Trittame loki (Brush-footed trapdoor spider) PE=1 SV=1	Neuroligin-4, X-linked [Crassostrea gigas]
TR55448_c2_g2	--	--	Cellular Component: nucleosome (GO:0000786);; Molecular Function: DNA binding (GO:0003677);; Cellular Component: lipid droplet (GO:0005811);; Biological Process: nucleosome assembly (GO:0006334);; Cellular Component: NuA4 histone acetyltransferase complex (GO:0035267);; Molecular Function: protein heterodimerization activity (GO:0046982);;	K11252|3e-62|isc:IscW_ISCW019496|histone H2B, putative	[B]	Chromatin structure and dynamics	Core histone H2A/H2B/H3/H4;; Histone-like transcription factor (CBF/NF-Y) and archaeal histone	Histone H2B, gonadal OS=Patella granatina (Sandpaper limpet) PE=1 SV=2	RecName: Full=Histone H2B, gonadal [Cymbula granatina]
TR3313_c0_g1	--	--	Molecular Function: guanyl-nucleotide exchange factor activity (GO:0005085);; Biological Process: positive regulation of GTPase activity (GO:0043547);;	--	[T]	Signal transduction mechanisms	Dock homology region 2	--	PREDICTED: dedicator of cytokinesis protein 7-like isoform X6 [Aplysia californica]
TR51732_c2_g1	--	--	--	K13210|4e-17|bfo:BRAFLDRAFT_124476|hypothetical protein	[A]	RNA processing and modification	KH domain	--	PREDICTED: far upstream element-binding protein 1-like isoform X3 [Crassostrea gigas]
TR57763_c0_g1	[H]	Coenzyme transport and metabolism	Biological Process: movement of cell or subcellular component (GO:0006928);; Molecular Function: nucleoside-triphosphatase activity (GO:0017111);; Cellular Component: dynein complex (GO:0030286);;	--	[PD]	--	--	Coiled-coil domain-containing protein 1 (Precursor) OS=Lottia gigantea (Giant owl limpet) PE=1 SV=1	conserved Plasmodium protein, unknown function [Plasmodium reichenowi]
TR11460_c0_g1	--	--	--	--	--	--	--	--	hypothetical protein CGI_10021820 [Crassostrea gigas]
TR10309_c0_g1	--	--	--	--	--	--	--	Calcium-binding protein P GN=cbpP OS=Dictyostelium discoideum (Slime mold) PE=2 SV=2	GA27145 [Drosophila pseudoobscura pseudoobscura]
TR30994_c0_g1	--	--	Cellular Component: mitochondrial inner membrane presequence translocase complex (GO:0005744);; Biological Process: intracellular protein transport (GO:0006886);; Molecular Function: P-P-bond-hydrolysis-driven protein transmembrane transporter activity (GO:0015450);; Cellular Component: integral component of membrane (GO:0016021);; Biological Process: protein transmembrane transport (GO:0071806);;	--	[U]	Intracellular trafficking, secretion, and vesicular transport	Tim17/Tim22/Tim23/Pmp24 family	Probable mitochondrial import inner membrane translocase subunit Tim17 1 GN=Tim17b1 OS=Drosophila melanogaster (Fruit fly) PE=2 SV=2	import inner membrane translocase subunit tim17, putative [Ixodes scapularis]
TR33935_c0_g1	[LKJ]	--	Molecular Function: nucleic acid binding (GO:0003676);; Molecular Function: helicase activity (GO:0004386);; Molecular Function: ATP binding (GO:0005524);; Biological Process: metabolic process (GO:0008152);;	--	[A]	RNA processing and modification	DEAD/DEAH box helicase;; Helicase conserved C-terminal domain;; Type III restriction enzyme, res subunit	Putative ATP-dependent RNA helicase T26G10.1 GN=T26G10.1 OS=Caenorhabditis elegans PE=3 SV=1	vasa-like gene-2, partial [Pinctada fucata]
TR56779_c0_g1	--	--	Molecular Function: calcium ion binding (GO:0005509);;	--	[T]	Signal transduction mechanisms	EGF-like domain;; Calcium-binding EGF domain;; Human growth factor-like EGF;; EGF-like domain;; Complement Clr-like EGF-like	Processed neurogenic locus Notch protein (Precursor) GN=N OS=Drosophila melanogaster (Fruit fly) PE=1 SV=3	predicted protein [Nematostella vectensis]
TR46276_c1_g1	--	--	Molecular Function: transcription coactivator activity (GO:0003713);; Molecular Function: transcription factor binding (GO:0008134);; Cellular Component: core-binding factor complex (GO:0016513);; Biological Process: regulation of hemocyte proliferation (GO:0035206);; Biological Process: positive regulation of transcription from RNA polymerase II promoter (GO:0045944);; Molecular Function: protei…	--	[K]	Transcription	Core binding factor beta subunit	Protein big brother GN=Bgb OS=Drosophila melanogaster (Fruit fly) PE=2 SV=3	hypothetical protein LOTGIDRAFT_163713 [Lottia gigantea]
TR18028_c0_g1	--	--	--	--	--	--	--	Galaxin-2 {ECO:0000303|PubMed:23765379} (Precursor) OS=Acropora millepora (Staghorn coral) PE=1 SV=1	hypothetical protein CAPTEDRAFT_74650, partial [Capitella teleta]
TR43200_c0_g2	--	--	--	--	--	--	--	--	PREDICTED: uncharacterized protein LOC105320185 isoform X2 [Crassostrea gigas]
TR37458_c0_g1	[R]	General function prediction only	Biological Process: metabolic process (GO:0008152);; Molecular Function: transferase activity (GO:0016740);;	K00670|0.0|aml:100472415|NAA15	[B]	Chromatin structure and dynamics	NMDA receptor-regulated protein 1;; Tetratricopeptide repeat;; Tetratricopeptide repeat;; Tetratricopeptide repeat;; Tetratricopeptide repeat;; TPR repeat;; Tetratricopeptide repeat;; Tetratricopeptide repeat	Phagocyte signaling-impaired protein OS=Drosophila melanogaster (Fruit fly) PE=2 SV=1	PREDICTED: N-alpha-acetyltransferase 15, NatA auxiliary subunit-like [Crassostrea gigas]
TR7271_c1_g1	[R]	General function prediction only	--	--	--	--	Reeler domain	Putative defense protein 3 (Precursor) OS=Antheraea mylitta (Tasar silkworm) PE=2 SV=1	PREDICTED: putative defense protein 3 isoform X3 [Crassostrea gigas]
TR39877_c0_g1	[RTKL]	--	Molecular Function: protein serine/threonine kinase activity (GO:0004674);; Molecular Function: ATP binding (GO:0005524);; Biological Process: protein phosphorylation (GO:0006468);;	K08282|3e-30|ame:411080|similar to greatwall CG7719-PA	[TR]	--	Protein kinase domain	Probable serine/threonine-protein kinase pkgA GN=pkgA OS=Dictyostelium discoideum (Slime mold) PE=3 SV=1	hypothetical protein LOTGIDRAFT_115088, partial [Lottia gigantea]
TR59003_c0_g1	--	--	--	--	--	--	Mab-21 protein	--	--
TR26513_c1_g1	[P]	Inorganic ion transport and metabolism	Molecular Function: hydrolase activity (GO:0016787);;	K01077|1e-173|spu:584498|similar to alkaline phosphatase	[P]	Inorganic ion transport and metabolism	Alkaline phosphatase	Membrane-bound alkaline phosphatase (Precursor) GN=Alp-m OS=Bombyx mori (Silk moth) PE=1 SV=4	PREDICTED: alkaline phosphatase-like [Crassostrea gigas]
TR38542_c1_g1	[O]	Posttranslational modification, protein turnover, chaperones	Biological Process: protein peptidyl-prolyl isomerization (GO:0000413);; Molecular Function: peptidyl-prolyl cis-trans isomerase activity (GO:0003755);; Biological Process: protein folding (GO:0006457);;	K12736|0.0|tgu:100225741|similar to peptidylprolyl isomerase domain and WD repeat containing 1	[O]	Posttranslational modification, protein turnover, chaperones	Cyclophilin type peptidyl-prolyl cis-trans isomerase/CLD;; WD domain, G-beta repeat	Peptidyl-prolyl cis-trans isomerase cypE GN=cypE OS=Dictyostelium discoideum (Slime mold) PE=1 SV=1	PREDICTED: peptidylprolyl isomerase domain and WD repeat-containing protein 1-like [Crassostrea gigas]
TR10697_c1_g1	--	--	--	--	--	--	Pro-apoptotic Bcl-2 protein, BAD;; Bcl-x interacting, BH3 domain	--	PREDICTED: uncharacterized protein LOC105337001 [Crassostrea gigas]
TR41009_c1_g1	--	--	Molecular Function: lyase activity (GO:0016829);;	K11390|1e-114|xla:447169|clybl, MGC85519	--	--	HpcH/HpaI aldolase/citrate lyase family;; C-C_Bond_Lyase of the TIM-Barrel fold	--	PREDICTED: citrate lyase subunit beta-like protein, mitochondrial [Crassostrea gigas]
TR10709_c0_g1	--	--	--	--	--	--	--	--	hypothetical protein CGI_10004316 [Crassostrea gigas]
TR50461_c0_g1	--	--	--	--	--	--	--	--	predicted protein [Nematostella vectensis]
TR1697_c0_g1	--	--	--	--	[TK]	--	--	--	PREDICTED: circadian locomoter output cycles protein kaput-like [Crassostrea gigas]
TR7466_c0_g1	--	--	Biological Process: response to hypoxia (GO:0001666);; Biological Process: mitochondrial electron transport, NADH to ubiquinone (GO:0006120);; Biological Process: response to heat (GO:0009408);; Biological Process: mitochondrial respiratory chain complex I assembly (GO:0032981);; Biological Process: response to starvation (GO:0042594);; Biological Process: response to hyperoxia (GO:0055093);;	--	[S]	Function unknown	Complex I intermediate-associated protein 30 (CIA30)	Probable complex I intermediate-associated protein 30, mitochondrial (Precursor) GN=CG7598 OS=Drosophila melanogaster (Fruit fly) PE=2 SV=1	hypothetical protein HELRODRAFT_177986 [Helobdella robusta]
TR50976_c0_g1	--	--	--	--	--	--	--	--	hypothetical protein BRAFLDRAFT_92023 [Branchiostoma floridae]
TR19662_c1_g1	--	--	--	--	--	--	Scavenger receptor cysteine-rich domain	Scavenger receptor cysteine-rich domain superfamily protein {ECO:0000312|EMBL:BAK39578.1} (Precursor) OS=Patiria pectinifera (Starfish) PE=1 SV=1	Deleted in malignant brain tumors 1 protein [Crassostrea gigas]
TR23282_c2_g2	--	--	--	--	[T]	Signal transduction mechanisms	--	Processed neurogenic locus Notch protein (Precursor) GN=N OS=Drosophila melanogaster (Fruit fly) PE=1 SV=3	PREDICTED: uncharacterized protein LOC105332731 [Crassostrea gigas]
TR10328_c1_g1	--	--	Molecular Function: peptidase activity (GO:0008233);;	K04397|4e-80|tgu:100218002|similar to caspase 7, apoptosis-related cysteine peptidase	[D]	Cell cycle control, cell division, chromosome partitioning	Caspase domain	Caspase-1 subunit p12 (Precursor) OS=Spodoptera frugiperda (Fall armyworm) PE=1 SV=1	PREDICTED: caspase-7-like isoform X1 [Crassostrea gigas]
TR223_c0_g1	--	--	--	--	[PT]	--	PKD domain	--	PREDICTED: uncharacterized protein LOC101864570 [Aplysia californica]
TR24578_c0_g1	--	--	Molecular Function: zinc ion binding (GO:0008270);;	--	[O]	Posttranslational modification, protein turnover, chaperones	--	RING finger protein 121 GN=rnf-121 OS=Caenorhabditis elegans PE=3 SV=1	PREDICTED: RING finger protein 121-like [Crassostrea gigas]
TR18299_c0_g2	--	--	--	--	--	--	Scavenger receptor cysteine-rich domain	Scavenger receptor cysteine-rich domain superfamily protein {ECO:0000312|EMBL:BAK39578.1} (Precursor) OS=Patiria pectinifera (Starfish) PE=1 SV=1	scavenger receptor cysteine-rich protein [Strongylocentrotus purpuratus]
TR15136_c0_g1	--	--	--	--	--	--	Mab-21 protein	--	--
TR34727_c0_g1	[D]	Cell cycle control, cell division, chromosome partitioning	--	--	[M]	Cell wall/membrane/envelope biogenesis	--	--	hypothetical protein TGDOM2_398080, partial [Toxoplasma gondii GAB2-2007-GAL-DOM2]
TR3092_c1_g1	--	--	--	--	[R]	General function prediction only	--	--	PREDICTED: hippocampus abundant transcript 1 protein-like [Crassostrea gigas]
TR53655_c0_g1	--	--	--	--	--	--	--	--	PREDICTED: uncharacterized protein LOC100368071 [Saccoglossus kowalevskii]
TR15713_c2_g1	[R]	General function prediction only	Molecular Function: calcium ion binding (GO:0005509);;	--	[R]	General function prediction only	Rab-GTPase-TBC domain	Ecotropic viral integration site 5 ortholog GN=Evi5 OS=Drosophila melanogaster (Fruit fly) PE=1 SV=3	PREDICTED: TBC1 domain family member 9-like isoform X1 [Crassostrea gigas]
TR35013_c0_g1	--	--	--	--	--	--	--	--	Hydrocephalus-inducing-like protein [Crassostrea gigas]
TR57558_c0_g1	[G]	Carbohydrate transport and metabolism	--	K10385|2e-33|mdo:100019077|hypothetical protein LOC100019077	--	--	--	Fibroin heavy chain (Precursor) GN=FIBH OS=Bombyx mori (Silk moth) PE=1 SV=4	PREDICTED: loricrin-like [Crassostrea gigas]
TR46179_c2_g1	--	--	Molecular Function: transporter activity (GO:0005215);; Biological Process: exocytosis (GO:0006887);; Cellular Component: synaptic vesicle (GO:0008021);; Cellular Component: membrane (GO:0016020);;	--	[TU]	--	C2 domain	Synaptotagmin-1 GN=snt-1 OS=Caenorhabditis elegans PE=2 SV=1	synaptotagmin 7 [Lottia gigantea]
TR43703_c0_g2	--	--	--	--	--	--	--	--	PREDICTED: centrosomal protein of 164 kDa-like isoform X2 [Crassostrea gigas]
TR3043_c1_g1	[RTKL]	--	Molecular Function: protein tyrosine kinase activity (GO:0004713);; Molecular Function: ATP binding (GO:0005524);; Biological Process: peptidyl-tyrosine phosphorylation (GO:0018108);;	K05125|1e-142|bfo:BRAFLDRAFT_225535|hypothetical protein	[T]	Signal transduction mechanisms	Protein tyrosine kinase;; Protein kinase domain	Tyrosine-protein kinase transmembrane receptor Ror (Precursor) GN=Ror OS=Drosophila melanogaster (Fruit fly) PE=1 SV=1	PREDICTED: discoidin domain-containing receptor 2-like isoform X1 [Crassostrea gigas]
TR52825_c0_g1	--	--	Biological Process: regulation of cellular process (GO:0050794);;	--	--	--	--	--	Protein still life, isoforms C/SIF type 2 [Crassostrea gigas]
TR14249_c0_g2	--	--	--	--	--	--	RNA recognition motif. (a.k.a. RRM, RBD, or RNP domain)	--	hypothetical protein LOTGIDRAFT_231563 [Lottia gigantea]
TR36943_c0_g1	--	--	--	K06704|7e-31|phu:Phum_PHUM259590|ADAM 10 precursor, putative (EC:3.4.24.81)	[W]	Extracellular structures	Reprolysin family propeptide	ADAM 17-like protease (Precursor) GN=Tace OS=Drosophila melanogaster (Fruit fly) PE=2 SV=2	PREDICTED: disintegrin and metalloproteinase domain-containing protein 10-like [Crassostrea gigas]
TR28044_c0_g1	--	--	Molecular Function: binding (GO:0005488);;	--	--	--	--	--	PREDICTED: uncharacterized protein LOC105330507 [Crassostrea gigas]
TR44462_c0_g2	--	--	--	--	--	--	Mab-21 protein	--	hypothetical protein CGI_10006277 [Crassostrea gigas]
TR32847_c2_g1	[O]	Posttranslational modification, protein turnover, chaperones	Molecular Function: catalytic activity (GO:0003824);; Molecular Function: binding (GO:0005488);; Biological Process: metabolic process (GO:0008152);;	--	[O]	Posttranslational modification, protein turnover, chaperones	ATPase family associated with various cellular activities (AAA);; Bromodomain;; AAA domain (Cdc48 subfamily)	Tat-binding homolog 7 GN=lex-1 OS=Caenorhabditis elegans PE=1 SV=3	PREDICTED: ATPase family AAA domain-containing protein 2B-like isoform X3 [Aplysia californica]
TR18014_c0_g1	--	--	--	--	[RP]	--	Thrombospondin type 1 domain	Mucin-like protein {ECO:0000303|PubMed:23765379} (Fragment) OS=Acropora millepora (Staghorn coral) PE=1 SV=1	predicted protein [Nematostella vectensis]
TR53763_c1_g1	--	--	--	--	[TV]	--	Sushi repeat (SCR repeat);; Hormone receptor domain;; Sushi repeat (SCR repeat);; Sushi repeat (SCR repeat)	Protein lev-9 (Precursor) GN=lev-9 OS=Caenorhabditis elegans PE=1 SV=3	PREDICTED: sushi, von Willebrand factor type A, EGF and pentraxin domain-containing protein 1-like [Amphimedon queenslandica]
TR46038_c0_g1	--	--	--	K10478|1e-46|aag:AaeL_AAEL002428|hypothetical protein	[S]	Function unknown	BTB/POZ domain;; BTB And C-terminal Kelch	Kelch-like protein 8 GN=kel-8 OS=Caenorhabditis elegans PE=1 SV=1	PREDICTED: BTB/POZ domain-containing protein 6-like [Crassostrea gigas]
TR1385_c0_g1	--	--	Molecular Function: nucleic acid binding (GO:0003676);; Molecular Function: NAD+ kinase activity (GO:0003951);; Molecular Function: diacylglycerol kinase activity (GO:0004143);; Molecular Function: ATP binding (GO:0005524);; Biological Process: protein kinase C-activating G-protein coupled receptor signaling pathway (GO:0007205);; Biological Process: phosphorylation (GO:0016310);; Biological Proc…	K00901|2e-38|nvi:100121318|NV14914	[IT]	--	Phorbol esters/diacylglycerol binding domain (C1 domain)	Protein kinase C-like 2 GN=pkc-2 OS=Caenorhabditis elegans PE=2 SV=2	hypothetical protein HELRODRAFT_81183 [Helobdella robusta]
TR53699_c2_g3	--	--	Molecular Function: protein serine/threonine kinase activity (GO:0004674);; Molecular Function: ATP binding (GO:0005524);; Biological Process: protein phosphorylation (GO:0006468);;	K08836|6e-25|phu:Phum_PHUM512860|polo kinase kinase, putative (EC:2.7.11.1)	[T]	Signal transduction mechanisms	Polo kinase kinase;; Polo kinase kinase	--	hypothetical protein LOTGIDRAFT_223090 [Lottia gigantea]
TR49332_c0_g1	--	--	--	--	--	--	TMEM187 protein family	--	hypothetical protein CGI_10002109 [Crassostrea gigas]
TR55719_c0_g1	[F]	Nucleotide transport and metabolism	Molecular Function: nucleotide binding (GO:0000166);; Cellular Component: cytoplasm (GO:0005737);; Biological Process: nucleotide metabolic process (GO:0009117);; Biological Process: deoxyribonucleoside triphosphate catabolic process (GO:0009204);; Molecular Function: metal ion binding (GO:0046872);; Molecular Function: nucleoside-triphosphate diphosphatase activity (GO:0047429);;	K01519|8e-87|nve:NEMVE_v1g163483|hypothetical protein	[F]	Nucleotide transport and metabolism	Ham1 family	Inosine triphosphate pyrophosphatase {ECO:0000255|HAMAP-Rule:MF_03148} GN=v1g163483 OS=Nematostella vectensis (Starlet sea anemone) PE=3 SV=1	PREDICTED: inosine triphosphate pyrophosphatase-like isoform X1 [Crassostrea gigas]
TR47198_c0_g1	--	--	Molecular Function: voltage-gated calcium channel activity (GO:0005245);; Cellular Component: voltage-gated calcium channel complex (GO:0005891);; Biological Process: regulation of ion transmembrane transport (GO:0034765);; Biological Process: calcium ion transmembrane transport (GO:0070588);;	K05315|9e-34|spu:578128|voltage dependent calcium channel L-type	[PT]	--	--	Voltage-dependent calcium channel type D subunit alpha-1 GN=Ca-alpha1D OS=Drosophila melanogaster (Fruit fly) PE=1 SV=2	calcium channel alpha-1 subunit, partial [Aplysia californica]
TR11216_c1_g1	--	--	Molecular Function: microtubule motor activity (GO:0003777);; Molecular Function: ATP binding (GO:0005524);; Biological Process: microtubule-based movement (GO:0007018);; Biological Process: metabolic process (GO:0008152);; Molecular Function: ATPase activity (GO:0016887);; Cellular Component: dynein complex (GO:0030286);;	--	[Z]	Cytoskeleton	P-loop containing dynein motor region D4	Dynein beta chain, ciliary OS=Heliocidaris crassispina (Sea urchin) PE=1 SV=1	PREDICTED: dynein heavy chain 5, axonemal-like isoform X2 [Crassostrea gigas]
TR2576_c0_g2	--	--	Biological Process: regulation of transcription, DNA-templated (GO:0006355);; Cellular Component: Piccolo NuA4 histone acetyltransferase complex (GO:0032777);;	K11322|0.0|bfo:BRAFLDRAFT_84982|hypothetical protein	[K]	Transcription	Enhancer of polycomb-like	PHD finger protein rhinoceros GN=rno OS=Drosophila melanogaster (Fruit fly) PE=1 SV=1	hypothetical protein LOTGIDRAFT_127385 [Lottia gigantea]
TR20018_c0_g1	--	--	--	--	--	--	--	--	hypothetical protein LOTGIDRAFT_235987 [Lottia gigantea]
TR43781_c0_g1	[G]	Carbohydrate transport and metabolism	Molecular Function: catalytic activity (GO:0003824);;	K01787|1e-178|bfo:BRAFLDRAFT_87662|hypothetical protein	--	--	N-acylglucosamine 2-epimerase (GlcNAc 2-epimerase)	--	PREDICTED: N-acylglucosamine 2-epimerase-like [Crassostrea gigas]
TR8094_c0_g1	--	--	--	K01107|1e-100|bfo:BRAFLDRAFT_251702|hypothetical protein	[F]	Nucleotide transport and metabolism	Inositol monophosphatase family	3&apos;(2&apos;),5&apos;-bisphosphate nucleotidase 1 GN=bpnt1 OS=Dictyostelium discoideum (Slime mold) PE=3 SV=1	PREDICTED: inositol polyphosphate 1-phosphatase-like [Crassostrea gigas]
TR41866_c0_g1	--	--	--	--	--	--	MAM domain, meprin/A5/mu;; Immunoglobulin domain;; Immunoglobulin domain	MAM and LDL-receptor class A domain-containing protein 1 (Fragment) OS=Acropora millepora (Staghorn coral) PE=1 SV=1	hypothetical protein BRAFLDRAFT_227853 [Branchiostoma floridae]
TR93_c0_g1	[LR]	--	Biological Process: DNA repair (GO:0006281);; Molecular Function: 8-oxo-7,8-dihydroguanosine triphosphate pyrophosphatase activity (GO:0008413);;	K03574|2e-78|bfo:BRAFLDRAFT_249348|hypothetical protein	--	--	NUDIX domain	--	hypothetical protein BRAFLDRAFT_249348 [Branchiostoma floridae]
TR20937_c0_g1	--	--	--	K10586|4e-69|oaa:100079899|BIRC6	[O]	Posttranslational modification, protein turnover, chaperones	--	--	PREDICTED: baculoviral IAP repeat-containing protein 6-like [Crassostrea gigas]
TR9380_c0_g1	--	--	--	--	[R]	General function prediction only	--	Single-stranded DNA-binding protein homolog sam-10 {ECO:0000250|UniProtKB:Q9BWW4} OS=Caenorhabditis elegans PE=2 SV=1	PREDICTED: BUB3-interacting and GLEBS motif-containing protein ZNF207-like [Crassostrea gigas]
TR57438_c7_g1	--	--	--	--	[S]	Function unknown	Eukaryotic protein of unknown function (DUF829)	--	hypothetical protein LOTGIDRAFT_121859 [Lottia gigantea]
TR58715_c0_g1	--	--	Molecular Function: transferase activity, transferring glycosyl groups (GO:0016757);;	K03848|1e-126|spu:591591|similar to Alg6-prov protein	[GE]	--	ALG6, ALG8 glycosyltransferase family	Probable dolichyl pyrophosphate Man9GlcNAc2 alpha-1,3-glucosyltransferase GN=gny OS=Drosophila melanogaster (Fruit fly) PE=2 SV=2	PREDICTED: dolichyl pyrophosphate Man9GlcNAc2 alpha-1,3-glucosyltransferase [Strongylocentrotus purpuratus]
TR45225_c0_g1	--	--	Molecular Function: structural molecule activity (GO:0005198);; Cellular Component: nuclear inner membrane (GO:0005637);; Cellular Component: lamin filament (GO:0005638);;	--	--	--	--	--	Intermediate filament tail domain-containing protein 1 [Crassostrea gigas]
TR47765_c0_g1	--	--	--	--	--	--	--	Short-chain collagen C4 (Fragment) OS=Ephydatia muelleri (Mueller&apos;s freshwater sponge) PE=2 SV=1	PREDICTED: uncharacterized protein LOC105330755 isoform X2 [Crassostrea gigas]
TR2246_c0_g1	--	--	--	--	--	--	--	Uncharacterized protein DDB_G0283357 GN=DDB_G0283357 OS=Dictyostelium discoideum (Slime mold) PE=4 SV=1	PREDICTED: girdin-like isoform X5 [Crassostrea gigas]
TR1868_c0_g1	[L]	Replication, recombination and repair	--	--	[D]	Cell cycle control, cell division, chromosome partitioning	PIF1-like helicase	ATP-dependent DNA helicase PIF2 (Precursor) GN=PIF2 OS=Trypanosoma brucei brucei (strain 927/4 GUTat10.1) PE=1 SV=1	PREDICTED: uncharacterized protein LOC105331263 [Crassostrea gigas]
TR31531_c0_g1	--	--	Biological Process: ion transport (GO:0006811);; Biological Process: cellular process (GO:0044763);;	--	--	--	--	--	PREDICTED: uncharacterized protein LOC105340463 isoform X2 [Crassostrea gigas]
TR57367_c0_g1	--	--	Molecular Function: translation initiation factor activity (GO:0003743);; Cellular Component: cytoplasm (GO:0005737);; Biological Process: translational initiation (GO:0006413);; Biological Process: intracellular distribution of mitochondria (GO:0048312);;	K03255|0.0|tca:663660|similar to CG8443-PA	[R]	General function prediction only	Clustered mitochondria;; Translation initiation factor eIF3 subunit 135;; Tetratricopeptide repeat;; Tetratricopeptide repeat;; Mitochondrial function, CLU-N-term;; Protein of unknown function (DUF727)	Clustered mitochondria protein homolog {ECO:0000255|HAMAP-Rule:MF_03013} GN=AAEL000794 OS=Aedes aegypti (Yellowfever mosquito) PE=3 SV=1	PREDICTED: clustered mitochondria protein homolog [Crassostrea gigas]
TR169_c0_g1	--	--	--	--	--	--	--	--	hypothetical protein BRAFLDRAFT_89374 [Branchiostoma floridae]
TR27817_c0_g1	--	--	Molecular Function: hydrolase activity (GO:0016787);;	--	--	--	Caspase recruitment domain	--	PREDICTED: mucin-17-like, partial [Aplysia californica]
TR1592_c0_g1	--	--	--	--	--	--	Ependymin	--	hypothetical protein LOTGIDRAFT_218124 [Lottia gigantea]
TR48109_c0_g1	--	--	--	--	--	--	MAM domain, meprin/A5/mu	MAM and LDL-receptor class A domain-containing protein 2 (Fragment) OS=Acropora millepora (Staghorn coral) PE=1 SV=1	hypothetical protein LOTGIDRAFT_228404 [Lottia gigantea]
TR9066_c2_g3	--	--	--	--	--	--	alpha/beta hydrolase fold;; Serine aminopeptidase, S33	--	PREDICTED: uncharacterized protein LOC105348075 [Crassostrea gigas]
TR55390_c0_g1	[J]	Translation, ribosomal structure and biogenesis	Biological Process: metabolic process (GO:0008152);; Molecular Function: transferase activity (GO:0016740);;	K00604|4e-87|ssc:100513511|methionyl-tRNA formyltransferase, mitochondrial-like	[J]	Translation, ribosomal structure and biogenesis	Formyl transferase;; Formyl transferase, C-terminal domain	--	hypothetical protein HELRODRAFT_68612 [Helobdella robusta]
TR22073_c0_g1	--	--	--	--	[T]	Signal transduction mechanisms	--	Formin-A GN=forA OS=Dictyostelium discoideum (Slime mold) PE=1 SV=1	unnamed protein product [Haemonchus contortus]
TR4493_c1_g1	--	--	Biological Process: metabolic process (GO:0008152);;	--	--	--	--	Inositol hexakisphosphate and diphosphoinositol-pentakisphosphate kinase GN=l(1)G0196 OS=Drosophila melanogaster (Fruit fly) PE=1 SV=2	Inositol hexakisphosphate and diphosphoinositol-pentakisphosphate kinase [Crassostrea gigas]
TR29154_c0_g1	--	--	--	--	--	--	Lecithin retinol acyltransferase	--	PREDICTED: uncharacterized protein LOC105325365 [Crassostrea gigas]
TR51725_c4_g1	--	--	--	--	[WV]	--	--	--	Ras-related protein Rab-27A [Crassostrea gigas]
TR14632_c0_g2	--	--	--	--	[Z]	Cytoskeleton	Actin	--	hypothetical protein LOTGIDRAFT_164583 [Lottia gigantea]
TR22387_c0_g1	--	--	Molecular Function: iron ion binding (GO:0005506);; Molecular Function: cysteine dioxygenase activity (GO:0017172);; Biological Process: L-cysteine metabolic process (GO:0046439);; Biological Process: oxidation-reduction process (GO:0055114);;	K00456|8e-86|bfo:BRAFLDRAFT_82885|hypothetical protein	[E]	Amino acid transport and metabolism	Cysteine dioxygenase type I;; PCO_ADO	Cysteine dioxygenase GN=cdo-1 OS=Caenorhabditis briggsae PE=3 SV=1	cysteine dioxygenase [Bathymodiolus septemdierum]
TR51457_c0_g3	--	--	--	--	--	--	Mitochondria-eating protein	--	PREDICTED: uncharacterized protein LOC105328034 [Crassostrea gigas]
TR13576_c0_g1	--	--	--	--	--	--	Alg9-like mannosyltransferase family	--	hypothetical protein LOTGIDRAFT_168569 [Lottia gigantea]
TR15315_c0_g1	[R]	General function prediction only	--	--	[T]	Signal transduction mechanisms	von Willebrand factor type A domain;; von Willebrand factor type A domain;; von Willebrand factor type A domain	Transmembrane matrix receptor MUP-4 {ECO:0000312|EMBL:AAK69172.1} (Precursor) OS=Caenorhabditis elegans PE=1 SV=4	PREDICTED: collagen alpha-1(XII) chain-like [Aplysia californica]
TR32000_c1_g2	--	--	--	--	--	--	--	Protein rolling stone GN=rost OS=Drosophila melanogaster (Fruit fly) PE=2 SV=2	PREDICTED: uncharacterized protein LOC101863547 [Aplysia californica]
TR4355_c0_g2	--	--	Biological Process: phosphate-containing compound metabolic process (GO:0006796);; Molecular Function: transferase activity, transferring phosphorus-containing groups (GO:0016772);; Biological Process: organophosphate metabolic process (GO:0019637);; Biological Process: cellular protein metabolic process (GO:0044267);;	K01106|3e-25|dre:368433|inppl1b, inppl1, si:bz46j2.7, si:rp71-46j2.7	[U]	Intracellular trafficking, secretion, and vesicular transport	SH2 domain	Tyrosine-protein kinase Abl GN=Abl OS=Drosophila melanogaster (Fruit fly) PE=1 SV=3	PREDICTED: phosphatidylinositol 3,4,5-trisphosphate 5-phosphatase 2A-like isoform X2 [Aplysia californica]
TR27484_c0_g1	--	--	--	--	--	--	Leucine rich repeat;; Leucine Rich repeats (2 copies)	--	Toll-like receptor4 [Pinctada martensii]
TR42597_c0_g1	--	--	--	--	--	--	Mid-1-related chloride channel (MCLC)	--	hypothetical protein LOTGIDRAFT_167589 [Lottia gigantea]
TR51381_c0_g1	--	--	--	--	--	--	Transmembrane protein 138	--	PREDICTED: transmembrane protein 138-like [Crassostrea gigas]
TR50885_c0_g1	--	--	--	--	--	--	--	--	Interferon-induced protein 44-like protein [Crassostrea gigas]
TR15163_c0_g2	--	--	--	--	[W]	Extracellular structures	--	Cadmium metallothionein (Precursor) GN=MTT1 OS=Tetrahymena thermophila PE=1 SV=1	PREDICTED: uncharacterized protein LOC105344107 isoform X1 [Crassostrea gigas]
TR45871_c1_g1	--	--	--	--	--	--	--	--	variable membrane protein precursor [Trichomonas vaginalis G3]
TR15431_c0_g2	--	--	--	--	[O]	Posttranslational modification, protein turnover, chaperones	Protein-tyrosine phosphatase	Furin-like protease 2 (Precursor) GN=Fur2 OS=Drosophila melanogaster (Fruit fly) PE=2 SV=2	Receptor-type tyrosine-protein phosphatase zeta [Crassostrea gigas]
TR35032_c0_g2	--	--	Biological Process: transport (GO:0006810);;	K13171|2e-10|dre:406751|srrm1, fc64f01, wu:fb34f04, wu:fb38b06, wu:fc64f01, zgc:63802	--	--	--	Putative uncharacterized protein DDB_G0290521 (Precursor) GN=DDB_G0290521 OS=Dictyostelium discoideum (Slime mold) PE=3 SV=2	hypothetical protein X975_03406, partial [Stegodyphus mimosarum]
TR41302_c0_g1	[L]	Replication, recombination and repair	Molecular Function: nucleic acid binding (GO:0003676);; Biological Process: DNA metabolic process (GO:0006259);; Molecular Function: DNA polymerase activity (GO:0034061);;	K00977|1e-101|spu:591373|similar to terminal deoxynucleotidyltransferase	[L]	Replication, recombination and repair	DNA polymerase beta thumb;; Helix-hairpin-helix domain;; DNA polymerase beta palm;; Fingers domain of DNA polymerase lambda	--	hypothetical protein LOTGIDRAFT_72364, partial [Lottia gigantea]
TR4202_c0_g1	--	--	--	--	--	--	Immunoglobulin domain;; Immunoglobulin domain;; Immunoglobulin domain	--	hypothetical protein LOTGIDRAFT_174458 [Lottia gigantea]
TR57497_c0_g2	--	--	--	--	[S]	Function unknown	Retinoic acid induced 16-like protein	UPF0518 protein GI14169 GN=GI14169 OS=Drosophila mojavensis (Fruit fly) PE=3 SV=1	PREDICTED: protein FAM160B1-like isoform X4 [Crassostrea gigas]
TR49815_c0_g1	--	--	--	--	--	--	Domain of unknown function (DUF4559)	--	--
TR47503_c0_g2	--	--	--	--	--	--	--	--	hypothetical protein CGI_10025765 [Crassostrea gigas]
TR20516_c0_g1	--	--	--	K13127|1e-16|spu:575494|similar to zinc finger protein 183	--	--	--	--	PREDICTED: uncharacterized protein LOC105443573 [Strongylocentrotus purpuratus]
TR15717_c1_g1	[S]	Function unknown	--	--	--	--	--	--	hypothetical protein LOTGIDRAFT_157981 [Lottia gigantea]
TR7545_c0_g1	--	--	--	--	[Y]	Nuclear structure	--	Papilin (Precursor) GN=Ppn OS=Drosophila melanogaster (Fruit fly) PE=1 SV=2	PREDICTED: myb-like protein X [Plutella xylostella]
TR26995_c0_g1	--	--	--	--	--	--	--	--	PREDICTED: uncharacterized protein LOC105556126 [Vollenhovia emeryi]
TR18374_c2_g1	--	--	Molecular Function: microtubule motor activity (GO:0003777);; Molecular Function: ATP binding (GO:0005524);; Biological Process: microtubule-based movement (GO:0007018);; Biological Process: metabolic process (GO:0008152);; Molecular Function: ATPase activity (GO:0016887);; Cellular Component: dynein complex (GO:0030286);; Cellular Component: motile cilium (GO:0031514);;	K10408|1e-125|bfo:BRAFLDRAFT_72756|hypothetical protein	--	--	Dynein heavy chain, N-terminal region 1	Dynein beta chain, ciliary OS=Tripneustes gratilla (Hawaian sea urchin) PE=1 SV=1	hypothetical protein BRAFLDRAFT_72756 [Branchiostoma floridae]
TR55780_c0_g2	--	--	--	--	--	--	B-box zinc finger	--	PREDICTED: E3 ubiquitin-protein ligase TRIM33-like [Crassostrea gigas]
TR48050_c0_g1	--	--	Biological Process: reproduction (GO:0000003);; Biological Process: developmental process involved in reproduction (GO:0003006);; Molecular Function: helicase activity (GO:0004386);; Biological Process: multicellular organism development (GO:0007275);; Biological Process: metabolic process (GO:0008152);; Molecular Function: ion binding (GO:0043167);; Biological Process: cellular process (GO:00447…	--	[A]	RNA processing and modification	Helicase conserved C-terminal domain	Probable pre-mRNA-splicing factor ATP-dependent RNA helicase mog-1 GN=mog-1 OS=Caenorhabditis elegans PE=1 SV=2	Putative pre-mRNA-splicing factor ATP-dependent RNA helicase mog-5 [Crassostrea gigas]
TR41005_c0_g1	--	--	Biological Process: nucleobase-containing compound metabolic process (GO:0006139);; Molecular Function: hydrolase activity (GO:0016787);;	K10900|6e-49|mmu:22427|Wrn, AI846146	[R]	General function prediction only	3'-5' exonuclease	Werner Syndrome-like exonuclease OS=Drosophila erecta (Fruit fly) PE=3 SV=1	Werner syndrome ATP-dependent helicase-like protein [Crassostrea gigas]
TR3914_c0_g2	[J]	Translation, ribosomal structure and biogenesis	Biological Process: spliceosomal tri-snRNP complex assembly (GO:0000244);; Cellular Component: viral nucleocapsid (GO:0019013);; Cellular Component: U4/U6 x U5 tri-snRNP complex (GO:0046540);;	K12844|0.0|dre:393476|prpf31, MGC66177, zgc:66177	[A]	RNA processing and modification	snoRNA binding domain, fibrillarin;; Prp31 C terminal domain	Nucleolar protein 58 GN=nop58 OS=Dictyostelium discoideum (Slime mold) PE=3 SV=1	PREDICTED: U4/U6 small nuclear ribonucleoprotein Prp31-like isoform X1 [Crassostrea gigas]
TR12418_c0_g1	[G]	Carbohydrate transport and metabolism	--	--	[G]	Carbohydrate transport and metabolism	--	Uncharacterized protein DDB_G0271670 (Precursor) GN=DDB_G0271670 OS=Dictyostelium discoideum (Slime mold) PE=3 SV=1	PREDICTED: uncharacterized transmembrane protein DDB_G0289901-like [Crassostrea gigas]
TR12469_c0_g1	--	--	Molecular Function: metal ion binding (GO:0046872);;	--	[B]	Chromatin structure and dynamics	Inhibitor of growth proteins N-terminal histone-binding	--	PREDICTED: inhibitor of growth protein 1-like [Crassostrea gigas]
TR8313_c0_g2	[S]	Function unknown	--	--	[R]	General function prediction only	Leucine rich repeat;; Leucine Rich repeats (2 copies);; Leucine rich repeats (6 copies)	P-granule-associated novel protein 1 (Precursor) GN=M88.6 OS=Caenorhabditis elegans PE=1 SV=1	leucine-rich repeat protein 4 [Azumapecten farreri]
TR54660_c0_g1	--	--	--	--	[S]	Function unknown	--	--	hypothetical protein LOTGIDRAFT_157467 [Lottia gigantea]
TR21785_c0_g1	--	--	--	K10271|1e-112|bfo:BRAFLDRAFT_115491|hypothetical protein	--	--	F-box-like;; Leucine Rich repeats (2 copies);; F-box domain;; Leucine Rich repeat;; Leucine Rich Repeat	Uncharacterized F-box/LRR-repeat protein C02F5.7 GN=C02F5.7 OS=Caenorhabditis elegans PE=3 SV=3	F-box/LRR-repeat protein 5 [Crassostrea gigas]
TR15254_c0_g1	--	--	--	--	[TV]	--	Lectin C-type domain	Perlucin OS=Haliotis laevigata (Abalone) PE=1 SV=3	C-type lectin [Ruditapes philippinarum]
TR23250_c0_g3	--	--	--	--	[A]	RNA processing and modification	PIN domain	--	hypothetical protein BRAFLDRAFT_99040 [Branchiostoma floridae]
TR37026_c0_g1	--	--	Molecular Function: ATP binding (GO:0005524);; Molecular Function: zinc ion binding (GO:0008270);;	--	--	--	--	--	hypothetical protein CGI_10022372 [Crassostrea gigas]
TR15412_c0_g1	--	--	Cellular Component: intracellular (GO:0005622);; Biological Process: proteolysis (GO:0006508);; Molecular Function: cysteine-type peptidase activity (GO:0008234);;	K05609|1e-80|bfo:BRAFLDRAFT_268698|hypothetical protein	[O]	Posttranslational modification, protein turnover, chaperones	Ubiquitin carboxyl-terminal hydrolase, family 1	Ubiquitin carboxyl-terminal hydrolase GN=UCH OS=Aplysia californica (California sea hare) PE=2 SV=1	PREDICTED: ubiquitin carboxyl-terminal hydrolase-like [Crassostrea gigas]
TR30428_c0_g2	--	--	Molecular Function: binding (GO:0005488);; Cellular Component: focal adhesion (GO:0005925);; Biological Process: germarium-derived egg chamber formation (GO:0007293);; Biological Process: open tracheal system development (GO:0007424);; Biological Process: salivary gland development (GO:0007431);; Biological Process: foregut morphogenesis (GO:0007440);; Biological Process: hindgut morphogenesis (G…	--	[T]	Signal transduction mechanisms	Cadherin domain	Fat-like cadherin-related tumor suppressor homolog (Precursor) GN=kug OS=Drosophila melanogaster (Fruit fly) PE=2 SV=3	PREDICTED: fat-like cadherin-related tumor suppressor homolog [Aplysia californica]
TR54641_c0_g1	--	--	--	--	--	--	--	--	hypothetical protein LOTGIDRAFT_165489 [Lottia gigantea]
TR48826_c0_g1	--	--	Molecular Function: G-protein coupled receptor activity (GO:0004930);; Biological Process: G-protein coupled receptor signaling pathway (GO:0007186);; Cellular Component: integral component of membrane (GO:0016021);;	--	--	--	Serpentine type 7TM GPCR chemoreceptor Srw;; 7 transmembrane receptor (rhodopsin family)	Allatostatin-A receptor OS=Bombyx mori (Silk moth) PE=2 SV=1	hypothetical protein LOTGIDRAFT_156959 [Lottia gigantea]
TR23429_c1_g2	--	--	--	--	--	--	BED zinc finger	--	--
TR17671_c0_g1	--	--	--	--	[S]	Function unknown	PDZ domain (Also known as DHR or GLGF)	Slo-interacting protein 1 GN=Slip1 OS=Drosophila melanogaster (Fruit fly) PE=1 SV=2	hypothetical protein LOTGIDRAFT_234023, partial [Lottia gigantea]
TR31943_c1_g2	[T]	Signal transduction mechanisms	--	K01104|4e-57|gga:396060|PTPRA, PTPA	[T]	Signal transduction mechanisms	Protein-tyrosine phosphatase;; Dual specificity phosphatase, catalytic domain	Receptor-type tyrosine-protein phosphatase {ECO:0000303|PubMed:9585503} (Precursor) OS=Caenorhabditis elegans PE=1 SV=1	PREDICTED: receptor-type tyrosine-protein phosphatase kappa-like isoform X4 [Crassostrea gigas]
TR30149_c1_g1	--	--	Molecular Function: catalytic activity (GO:0003824);;	--	[T]	Signal transduction mechanisms	--	Cell death abnormality protein 1 {ECO:0000303|PubMed:11163239} (Precursor) OS=Caenorhabditis elegans PE=1 SV=1	Receptor-type tyrosine-protein phosphatase T [Crassostrea gigas]
TR41921_c1_g1	--	--	Cellular Component: intracellular (GO:0005622);; Biological Process: signal transduction (GO:0007165);;	K08052|0.0|bfo:BRAFLDRAFT_95685|hypothetical protein	[V]	Defense mechanisms	--	Threonine-rich protein {ECO:0000303|PubMed:23765379} (Precursor; Fragment) OS=Acropora millepora (Staghorn coral) PE=1 SV=1	PREDICTED: neurofibromin-like isoform X10 [Crassostrea gigas]
TR12959_c0_g1	--	--	--	--	[L]	Replication, recombination and repair	--	--	hypothetical protein LOTGIDRAFT_229698 [Lottia gigantea]
TR57455_c0_g2	[L]	Replication, recombination and repair	--	--	[R]	General function prediction only	Reverse transcriptase (RNA-dependent DNA polymerase)	Endonuclease GN=pol OS=Drosophila melanogaster (Fruit fly) PE=3 SV=1	PREDICTED: uncharacterized protein K02A2.6-like [Crassostrea gigas]
TR22622_c0_g1	[M]	Cell wall/membrane/envelope biogenesis	--	--	[MW]	--	Fasciclin domain	Fasciclin-1 (Precursor) GN=FAS1 OS=Schistocerca americana (American grasshopper) PE=1 SV=1	hypothetical protein LOTGIDRAFT_164994 [Lottia gigantea]
TR56826_c0_g1	--	--	--	--	--	--	--	--	PREDICTED: uncharacterized protein LOC105336126 [Crassostrea gigas]
TR31838_c0_g1	--	--	Molecular Function: nucleic acid binding (GO:0003676);;	--	[R]	General function prediction only	--	--	Zinc finger protein 64 [Crassostrea gigas]
TR57438_c9_g1	--	--	--	K02187|5e-42|tgu:100230799|caspase 3	[D]	Cell cycle control, cell division, chromosome partitioning	Caspase domain	Caspase-1 subunit p13 (Precursor) GN=Dcp-1 OS=Drosophila melanogaster (Fruit fly) PE=1 SV=1	Caspase-1, partial [Stegodyphus mimosarum]
TR50532_c0_g1	--	--	Molecular Function: G-protein coupled receptor binding (GO:0001664);; Molecular Function: GTPase activity (GO:0003924);; Molecular Function: signal transducer activity (GO:0004871);; Molecular Function: GTP binding (GO:0005525);; Biological Process: G-protein coupled receptor signaling pathway (GO:0007186);; Biological Process: metabolic process (GO:0008152);; Molecular Function: G-protein beta/g…	K04634|0.0|spu:404200|gnaq	[T]	Signal transduction mechanisms	G-protein alpha subunit;; ADP-ribosylation factor family	Guanine nucleotide-binding protein G(q) subunit alpha GN=SCGQA OS=Mizuhopecten yessoensis (Japanese scallop) PE=2 SV=1	Gq [Platynereis dumerilii]
TR47881_c1_g1	[Z]	Cytoskeleton	Molecular Function: microtubule motor activity (GO:0003777);; Molecular Function: ATP binding (GO:0005524);; Cellular Component: cytoplasm (GO:0005737);; Cellular Component: kinesin complex (GO:0005871);; Cellular Component: microtubule (GO:0005874);; Biological Process: microtubule-based movement (GO:0007018);; Molecular Function: microtubule binding (GO:0008017);; Biological Process: metabolic …	K10394|0.0|cfa:474675|KIF3A	[Z]	Cytoskeleton	Kinesin motor domain;; Microtubule binding	Kinesin-II 85 kDa subunit GN=KRP85 OS=Strongylocentrotus purpuratus (Purple sea urchin) PE=1 SV=1	PREDICTED: kinesin-like protein KIF3A-like isoform X2 [Aplysia californica]
TR35180_c0_g1	--	--	--	--	--	--	Coiled-coil domain-containing protein 167	--	predicted protein [Nematostella vectensis]
TR6524_c0_g1	[R]	General function prediction only	--	K06530|4e-32|tgu:100231679|CD109	[O]	Posttranslational modification, protein turnover, chaperones	MG2 domain	--	PREDICTED: CD109 antigen-like [Crassostrea gigas]
TR14415_c0_g1	[R]	General function prediction only	Biological Process: transport (GO:0006810);;	--	[R]	General function prediction only	Ankyrin repeats (3 copies);; Ankyrin repeats (many copies);; Ankyrin repeats (many copies);; Ankyrin repeat;; Ankyrin repeat;; Ion transport protein;; Polycystin cation channel	Ankyrin repeat, PH and SEC7 domain containing protein secG GN=secG OS=Dictyostelium discoideum (Slime mold) PE=2 SV=1	PREDICTED: transient receptor potential cation channel subfamily V member 3-like isoform X3 [Crassostrea gigas]
TR92_c0_g1	--	--	Biological Process: male courtship behavior (GO:0008049);; Biological Process: lateral inhibition (GO:0046331);; Biological Process: mating behavior, sex discrimination (GO:0048047);;	--	--	--	--	Interaptin GN=abpD OS=Dictyostelium discoideum (Slime mold) PE=1 SV=1	hypothetical protein LOTGIDRAFT_171452 [Lottia gigantea]
TR58403_c1_g3	[L]	Replication, recombination and repair	Molecular Function: organic cyclic compound binding (GO:0097159);; Molecular Function: heterocyclic compound binding (GO:1901363);;	K12646|5e-77|bfo:BRAFLDRAFT_249506|hypothetical protein	[R]	General function prediction only	C-terminal domain of RIG-I;; Type III restriction enzyme, res subunit;; DEAD/DEAH box helicase;; Helicase conserved C-terminal domain	Endoribonuclease dcr-1 GN=dcr-1 OS=Caenorhabditis elegans PE=1 SV=3	PREDICTED: interferon-induced helicase C domain-containing protein 1-like [Crassostrea gigas]
TR51768_c0_g3	--	--	--	--	[T]	Signal transduction mechanisms	Granulin	Pars intercerebralis major peptide D1 OS=Locusta migratoria (Migratory locust) PE=1 SV=1	PREDICTED: granulins-like, partial [Saccoglossus kowalevskii]
TR35336_c1_g1	[R]	General function prediction only	Molecular Function: organic cyclic compound binding (GO:0097159);; Molecular Function: heterocyclic compound binding (GO:1901363);;	--	[R]	General function prediction only	RNA recognition motif. (a.k.a. RRM, RBD, or RNP domain)	Protein boule GN=bol OS=Drosophila melanogaster (Fruit fly) PE=2 SV=1	PREDICTED: protein boule-like, partial [Aplysia californica]
TR2992_c0_g1	--	--	--	--	--	--	--	--	hypothetical protein CGI_10014605 [Crassostrea gigas]
TR27569_c0_g1	--	--	Molecular Function: hydrolase activity (GO:0016787);; Biological Process: macromolecule metabolic process (GO:0043170);;	--	[G]	Carbohydrate transport and metabolism	Chitin binding Peritrophin-A domain	Chondroitin proteoglycan-2 (Precursor) GN=cpg-2 OS=Caenorhabditis elegans PE=1 SV=3	chitinase-3 [Hyriopsis cumingii]
TR58558_c0_g2	--	--	Molecular Function: metal ion binding (GO:0046872);;	--	[O]	Posttranslational modification, protein turnover, chaperones	Zinc finger, C3HC4 type (RING finger);; RING-type zinc-finger	--	PREDICTED: E3 ubiquitin-protein ligase RNF170-like [Crassostrea gigas]
TR10064_c0_g1	--	--	--	--	[R]	General function prediction only	Tetraspanin family	23 kDa integral membrane protein OS=Schistosoma japonicum (Blood fluke) PE=2 SV=1	PREDICTED: CD82 antigen-like [Crassostrea gigas]
TR57455_c0_g5	--	--	--	--	[R]	General function prediction only	Integrase core domain	Uncharacterized protein K02A2.6 GN=K02A2.6 OS=Caenorhabditis elegans PE=3 SV=1	PREDICTED: uncharacterized protein K02A2.6-like [Crassostrea gigas]
TR22559_c0_g1	--	--	--	--	--	--	--	--	PREDICTED: breast cancer type 2 susceptibility protein homolog [Crassostrea gigas]
TR58306_c0_g1	--	--	--	--	--	--	Replication protein A interacting C-terminal;; Replication protein A interacting N-terminal;; Replication protein A interacting middle	RIP-like protein GN=Ripalpha OS=Drosophila melanogaster (Fruit fly) PE=2 SV=1	PREDICTED: RPA-interacting protein A-like isoform X2 [Crassostrea gigas]
TR39339_c0_g2	--	--	--	--	[T]	Signal transduction mechanisms	EGF-like domain;; Human growth factor-like EGF;; Calcium-binding EGF domain;; EGF-like domain	Fibropellin-1 (Precursor) GN=EGF1 OS=Strongylocentrotus purpuratus (Purple sea urchin) PE=1 SV=2	PREDICTED: neurogenic locus notch homolog protein 2-like, partial [Saccoglossus kowalevskii]
TR45816_c1_g1	--	--	--	--	--	--	--	Interaptin GN=abpD OS=Dictyostelium discoideum (Slime mold) PE=1 SV=1	viral A-type inclusion protein [Trichomonas vaginalis G3]
TR57377_c0_g2	--	--	--	--	--	--	--	--	PREDICTED: cation-dependent mannose-6-phosphate receptor-like [Crassostrea gigas]
TR15566_c0_g1	--	--	--	--	--	--	C1q domain	--	--
TR26982_c0_g2	--	--	--	--	--	--	--	--	hypothetical protein LOTGIDRAFT_164069 [Lottia gigantea]
TR46529_c1_g1	[R]	General function prediction only	--	--	[R]	General function prediction only	Rab-GTPase-TBC domain	Ecotropic viral integration site 5 ortholog GN=Evi5 OS=Drosophila melanogaster (Fruit fly) PE=1 SV=3	hypothetical protein LOTGIDRAFT_72266, partial [Lottia gigantea]
TR24602_c0_g1	--	--	Biological Process: establishment of planar polarity (GO:0001736);; Molecular Function: G-protein alpha-subunit binding (GO:0001965);; Biological Process: determination of adult lifespan (GO:0008340);; Biological Process: regulation of signal transduction (GO:0009966);; Biological Process: Wnt signaling pathway (GO:0016055);; Cellular Component: vesicle (GO:0031982);; Biological Process: locomoti…	--	[TU]	--	PDZ domain (Also known as DHR or GLGF)	--	PREDICTED: PDZ domain-containing protein GIPC1-like [Crassostrea gigas]
TR32710_c0_g1	--	--	--	--	[WV]	--	--	Location of vulva defective 1 (Precursor) GN=lov-1 OS=Caenorhabditis elegans PE=1 SV=4	hypothetical protein LOTGIDRAFT_152975 [Lottia gigantea]
TR16556_c0_g2	--	--	Molecular Function: binding (GO:0005488);; Biological Process: Notch signaling pathway (GO:0007219);; Biological Process: sensory organ development (GO:0007423);; Biological Process: imaginal disc morphogenesis (GO:0007560);; Biological Process: imaginal disc-derived appendage morphogenesis (GO:0035114);; Biological Process: post-embryonic appendage morphogenesis (GO:0035120);; Biological Process…	K10645|3e-10|dse:Dsec_GM24452|GM24452 gene product from transcript GM24452-RA	[R]	General function prediction only	Zinc finger, C3HC4 type (RING finger)	E3 ubiquitin-protein ligase mind-bomb GN=mib1 OS=Drosophila melanogaster (Fruit fly) PE=1 SV=3	GM24452 [Drosophila sechellia]
TR49464_c1_g1	--	--	--	--	--	--	--	--	PREDICTED: uncharacterized protein LOC105347423 [Crassostrea gigas]
TR9251_c0_g2	[U]	Intracellular trafficking, secretion, and vesicular transport	--	K12490|3e-61|cin:100169677|centd2, Ci-ArfGAP-8	[TZ]	--	Putative GTPase activating protein for Arf;; PH domain	Centaurin-gamma-1A GN=CenG1A OS=Drosophila melanogaster (Fruit fly) PE=2 SV=2	PREDICTED: arf-GAP with Rho-GAP domain, ANK repeat and PH domain-containing protein 2-like isoform X4 [Crassostrea gigas]
TR33703_c0_g1	--	--	--	--	--	--	--	--	hypothetical protein LOTGIDRAFT_158307 [Lottia gigantea]
TR47158_c0_g1	--	--	--	K03122|4e-06|bfo:BRAFLDRAFT_126818|hypothetical protein	--	--	--	--	PREDICTED: histone-lysine N-methyltransferase SETD1B isoform X5 [Camponotus floridanus]
TR6653_c0_g1	[IQR]	--	Molecular Function: oxidoreductase activity (GO:0016491);; Biological Process: oxidation-reduction process (GO:0055114);;	K13368|2e-95|bfo:BRAFLDRAFT_291019|hydroxysteroid dehydrogenase 2	[QR]	--	short chain dehydrogenase;; Enoyl-(Acyl carrier protein) reductase;; Fungal family of unknown function (DUF1776);; KR domain	3 beta-hydroxysteroid dehydrogenase dhs-16 GN=dhs-16 OS=Caenorhabditis elegans PE=2 SV=1	Corticosteroid 11-beta-dehydrogenase isozyme 2 [Crassostrea gigas]
TR36892_c0_g1	--	--	Biological Process: transport (GO:0044765);;	K05320|2e-27|hmg:100208489|similar to predicted protein	[P]	Inorganic ion transport and metabolism	BTB/POZ domain	Potassium voltage-gated channel protein Shaw GN=Shaw OS=Drosophila melanogaster (Fruit fly) PE=2 SV=1	PREDICTED: potassium voltage-gated channel protein Shaw-like [Crassostrea gigas]
TR48815_c0_g1	[R]	General function prediction only	--	--	[R]	General function prediction only	Ankyrin repeats (many copies);; Ankyrin repeats (many copies);; Ankyrin repeats (3 copies);; Ankyrin repeat;; Ankyrin repeat	Tankyrase OS=Drosophila melanogaster (Fruit fly) PE=1 SV=1	PREDICTED: ankyrin repeat domain-containing protein 13B-like isoform X2 [Aplysia californica]
TR52272_c1_g1	--	--	--	--	--	--	Zinc finger, C3HC4 type (RING finger);; Zinc finger, C3HC4 type (RING finger);; Zinc finger, C3HC4 type (RING finger);; Ring finger domain	Protein deltex GN=dx OS=Drosophila melanogaster (Fruit fly) PE=1 SV=2	hypothetical protein BRAFLDRAFT_214947 [Branchiostoma floridae]
TR13388_c0_g1	--	--	--	--	--	--	Nodulin	--	--
TR3529_c0_g1	--	--	--	--	--	--	--	--	PREDICTED: piggyBac transposable element-derived protein 4-like [Crassostrea gigas]
TR29326_c0_g1	[O]	Posttranslational modification, protein turnover, chaperones	--	--	[O]	Posttranslational modification, protein turnover, chaperones	Trypsin-like peptidase domain	--	hypothetical protein LOTGIDRAFT_172074 [Lottia gigantea]
TR35336_c2_g2	--	--	--	K07964|1e-93|ptr:461206|HPSE	--	--	Glycosyl hydrolase family 79, N-terminal domain	--	PREDICTED: heparanase-like [Crassostrea gigas]
TR47835_c0_g1	--	--	--	--	--	--	--	--	PREDICTED: uncharacterized protein LOC105438908 [Strongylocentrotus purpuratus]
TR49027_c0_g1	--	--	Molecular Function: dioxygenase activity (GO:0051213);; Biological Process: oxidation-reduction process (GO:0055114);;	--	[I]	Lipid transport and metabolism	Phytanoyl-CoA dioxygenase (PhyH)	Phytanoyl-CoA dioxygenase domain-containing protein 1 homolog GN=Y105C5B.9 OS=Caenorhabditis elegans PE=3 SV=1	PREDICTED: phytanoyl-CoA dioxygenase domain-containing protein 1-like [Crassostrea gigas]
TR25196_c0_g1	[O]	Posttranslational modification, protein turnover, chaperones	--	K01415|1e-111|oaa:100080499|similar to endothelin-converting enzyme	[E]	Amino acid transport and metabolism	Peptidase family M13;; Peptidase family M13	Neprilysin-11 GN=nep-11 OS=Caenorhabditis elegans PE=1 SV=2	PREDICTED: endothelin-converting enzyme 1-like isoform X2 [Crassostrea gigas]
TR25843_c1_g3	[RTKL]	--	Molecular Function: transferase activity (GO:0016740);;	K08796|1e-27|xtr:100491623|BR serine/threonine-protein kinase 2-like	[T]	Signal transduction mechanisms	Protein kinase domain;; Protein tyrosine kinase;; Kinase-like;; RIO1 family	Probable myosin light chain kinase DDB_G0282429 GN=DDB_G0282429 OS=Dictyostelium discoideum (Slime mold) PE=3 SV=1	protein kinase 1 [Dictyostelium fasciculatum]
TR56960_c0_g3	--	--	--	--	--	--	Mitochondrial and peroxisomal fission factor Mff	Transport and Golgi organization protein 11 GN=Tango11 OS=Drosophila melanogaster (Fruit fly) PE=1 SV=1	hypothetical protein LOTGIDRAFT_236766 [Lottia gigantea]
TR44392_c0_g1	--	--	--	--	--	--	--	--	hypothetical protein CGI_10011496 [Crassostrea gigas]
TR23865_c2_g7	--	--	--	--	--	--	--	--	PREDICTED: uncharacterized protein LOC105323728 [Crassostrea gigas]
TR40267_c0_g1	--	--	--	--	--	--	--	Myosin-2 heavy chain GN=mhcA OS=Dictyostelium discoideum (Slime mold) PE=1 SV=3	PREDICTED: centlein-like isoform X5 [Crassostrea gigas]
TR51276_c0_g1	[L]	Replication, recombination and repair	--	K10896|7e-72|bfo:BRAFLDRAFT_118736|hypothetical protein	[L]	Replication, recombination and repair	ERCC4 domain	ABC transporter F family member 4 GN=abcF4 OS=Dictyostelium discoideum (Slime mold) PE=3 SV=1	PREDICTED: Fanconi anemia group M protein-like [Crassostrea gigas]
TR57582_c0_g2	--	--	--	--	--	--	C1q domain	--	sialic acid-binding lectin [Ruditapes philippinarum]
TR40231_c0_g1	--	--	--	--	[S]	Function unknown	Predicted coiled-coil domain-containing protein (DUF2360)	WASH complex subunit CCDC53 homolog GN=CG7429 OS=Drosophila melanogaster (Fruit fly) PE=1 SV=2	PREDICTED: WASH complex subunit CCDC53-like [Crassostrea gigas]
TR39292_c0_g1	--	--	--	--	--	--	Caspase recruitment domain	--	PREDICTED: uncharacterized protein LOC105327649 [Crassostrea gigas]
TR49104_c0_g2	--	--	--	--	--	--	Putative DNA-binding domain	--	PREDICTED: uncharacterized protein LOC105341485 [Crassostrea gigas]
TR57266_c0_g1	--	--	--	--	--	--	--	--	hypothetical protein LOTGIDRAFT_238761 [Lottia gigantea]
TR32089_c0_g2	--	--	Molecular Function: catalytic activity (GO:0003824);;	--	--	--	Sulfotransferase domain;; Sulfotransferase family;; Sulfotransferase family	Carbohydrate sulfotransferase 15 (Fragments) GN=GALNAC4S6ST OS=Nototodarus sloanii (Wellington flying squid) PE=1 SV=2	PREDICTED: carbohydrate sulfotransferase 15-like [Crassostrea gigas]
TR34281_c0_g1	--	--	Biological Process: intracellular signal transduction (GO:0035556);;	--	--	--	--	--	PREDICTED: ras guanyl-releasing protein 3-like [Aplysia californica]
TR46371_c0_g2	--	--	--	--	--	--	Lecithin retinol acyltransferase	--	hypothetical protein LOTGIDRAFT_162789 [Lottia gigantea]
TR22145_c0_g1	[R]	General function prediction only	--	--	[R]	General function prediction only	Ankyrin repeats (3 copies);; Ankyrin repeats (many copies);; Ankyrin repeats (many copies);; Ankyrin repeat;; Ankyrin repeat	Ankyrin repeat, PH and SEC7 domain containing protein secG GN=secG OS=Dictyostelium discoideum (Slime mold) PE=2 SV=1	hypothetical protein LOTGIDRAFT_171723 [Lottia gigantea]
TR26987_c1_g1	--	--	Molecular Function: calcium channel activity (GO:0005262);; Biological Process: neuropeptide signaling pathway (GO:0007218);; Cellular Component: integral component of membrane (GO:0016021);; Biological Process: calcium ion transmembrane transport (GO:0070588);;	--	--	--	--	--	hypothetical protein WUBG_01344, partial [Wuchereria bancrofti]
TR26948_c0_g1	[Z]	Cytoskeleton	Molecular Function: GTPase activity (GO:0003924);; Molecular Function: structural constituent of cytoskeleton (GO:0005200);; Molecular Function: GTP binding (GO:0005525);; Cellular Component: microtubule (GO:0005874);; Biological Process: microtubule-based process (GO:0007017);; Biological Process: metabolic process (GO:0008152);; Biological Process: protein polymerization (GO:0051258);;	K07375|1e-72|spu:591977|similar to tubulin, beta, 2	[Z]	Cytoskeleton	Tubulin C-terminal domain	Tubulin beta chain (Fragment) OS=Strongylocentrotus purpuratus (Purple sea urchin) PE=2 SV=1	beta tubulin, partial [Yoldia scissurata]
TR48454_c0_g1	--	--	--	--	[J]	Translation, ribosomal structure and biogenesis	Ribosomal protein S6	Probable 28S ribosomal protein S6, mitochondrial GN=mRpS6 OS=Drosophila melanogaster (Fruit fly) PE=2 SV=1	hypothetical protein LOTGIDRAFT_229034 [Lottia gigantea]
TR18954_c0_g2	[T]	Signal transduction mechanisms	--	--	[T]	Signal transduction mechanisms	RhoGEF domain;; Variant SH3 domain;; Variant SH3 domain;; SH3 domain	RhoGEF domain-containing protein gxcJ GN=gxcJ OS=Dictyostelium discoideum (Slime mold) PE=3 SV=1	SH3 domain-containing guanine exchange factor [Crassostrea gigas]
TR49925_c0_g1	--	--	--	--	[R]	General function prediction only	Endonuclease-reverse transcriptase	--	endonuclease/reverse transcriptase [Branchiostoma floridae]
TR58296_c0_g1	--	--	--	--	[S]	Function unknown	Protein of unknown function (DUF563)	EGF domain-specific O-linked N-acetylglucosamine transferase (Precursor) GN=Eogt OS=Drosophila melanogaster (Fruit fly) PE=1 SV=1	hypothetical protein LOTGIDRAFT_153919 [Lottia gigantea]
TR28066_c0_g1	--	--	--	--	[J]	Translation, ribosomal structure and biogenesis	Mitochondrial 28S ribosomal protein S22	--	mitochondrial ribosomal protein s22 [Philodina roseola]
TR7978_c0_g1	--	--	--	--	--	--	--	--	hypothetical protein CGI_10014940, partial [Crassostrea gigas]
TR6698_c0_g1	[G]	Carbohydrate transport and metabolism	--	--	[R]	General function prediction only	Haloacid dehalogenase-like hydrolase	--	hypothetical protein BRAFLDRAFT_279146 [Branchiostoma floridae]
TR33223_c0_g1	[CR]	--	--	--	[CR]	--	Zinc-binding dehydrogenase;; Zinc-binding dehydrogenase;; Alcohol dehydrogenase GroES-like domain	Quinone oxidoreductase-like protein 2 homolog GN=v1g238856 OS=Nematostella vectensis (Starlet sea anemone) PE=3 SV=1	hypothetical protein LOTGIDRAFT_219806 [Lottia gigantea]
TR34404_c0_g1	--	--	--	--	--	--	Fibrinogen beta and gamma chains, C-terminal globular domain	--	Angiopoietin-4 [Crassostrea gigas]
TR42488_c0_g1	--	--	--	--	--	--	--	Sarcoplasmic calcium-binding protein OS=Mizuhopecten yessoensis (Japanese scallop) PE=1 SV=1	sarcoplasmic calcium-binding protein [Mizuhopecten yessoensis]
TR10448_c6_g3	--	--	--	K10446|2e-08|nve:NEMVE_v1g227865|hypothetical protein	[TR]	--	PHR domain;; BTB/POZ domain;; Domain of unknown function (DUF3342)	--	PREDICTED: BTB/POZ domain-containing protein 1-like [Crassostrea gigas]
TR42134_c0_g1	--	--	--	--	--	--	--	--	Protocadherin-9 [Crassostrea gigas]
TR30618_c0_g1	--	--	--	--	--	--	Mab-21 protein	--	--
TR42492_c0_g1	--	--	Molecular Function: nucleotide binding (GO:0000166);; Biological Process: movement of cell or subcellular component (GO:0006928);; Molecular Function: nucleoside-triphosphatase activity (GO:0017111);; Cellular Component: dynein complex (GO:0030286);;	--	[Z]	Cytoskeleton	Dynein heavy chain and region D6 of dynein motor	Dynein beta chain, ciliary OS=Tripneustes gratilla (Hawaian sea urchin) PE=1 SV=1	Dynein heavy chain 1, axonemal [Crassostrea gigas]
TR8319_c1_g2	--	--	--	--	--	--	C1q domain	Heavy metal-binding protein HIP OS=Mytilus edulis (Blue mussel) PE=1 SV=1	Complement C1q tumor necrosis factor-related protein 3 [Crassostrea gigas]
TR20738_c0_g1	--	--	--	K12388|1e-158|rno:83576|Sort1, Nt3, Nts3	[R]	General function prediction only	Sortilin, neurotensin receptor 3,;; Sortilin, neurotensin receptor 3, C-terminal;; BNR/Asp-box repeat	--	PREDICTED: sortilin-like isoform X2 [Crassostrea gigas]
TR53749_c0_g1	[RTKL]	--	Molecular Function: protein tyrosine kinase activity (GO:0004713);; Biological Process: phosphorylation (GO:0016310);; Biological Process: biological_process (GO:0044699);;	K05094|0.0|gga:396515|FGFR3	[T]	Signal transduction mechanisms	Protein tyrosine kinase;; Protein kinase domain;; Immunoglobulin I-set domain;; Immunoglobulin domain;; Immunoglobulin domain;; Immunoglobulin domain;; Immunoglobulin V-set domain;; Ig-like domain on T-cell surface glycoprotein CD3 epsilon chain;; CD80-like C2-set immunoglobulin domain	Fibroblast growth factor receptor (Precursor) GN=FGFR OS=Strongylocentrotus purpuratus (Purple sea urchin) PE=2 SV=1	Fibroblast growth factor receptor 3 [Crassostrea gigas]
TR30589_c0_g1	--	--	Biological Process: regulation of cellular process (GO:0050794);;	--	[T]	Signal transduction mechanisms	--	--	PREDICTED: guanine nucleotide exchange factor DBS-like isoform X2 [Crassostrea gigas]
TR58973_c0_g1	--	--	--	--	[T]	Signal transduction mechanisms	von Willebrand factor type A domain;; von Willebrand factor type A domain	Transmembrane matrix receptor MUP-4 {ECO:0000312|EMBL:AAK69172.1} (Precursor) OS=Caenorhabditis elegans PE=1 SV=4	PREDICTED: uncharacterized protein LOC105331104 [Crassostrea gigas]
TR52663_c0_g1	--	--	--	--	--	--	Prokaryotic phospholipase A2	Conodipine-M alpha chain OS=Conus magus (Magus cone) PE=1 SV=2	hypothetical protein LOTGIDRAFT_163589 [Lottia gigantea]
TR40287_c4_g1	--	--	--	--	[Z]	Cytoskeleton	Actin	Actin, muscle (Fragment) OS=Lytechinus pictus (Painted sea urchin) PE=3 SV=1	beta-actin, partial [Gryllus firmus]
TR9783_c0_g1	--	--	--	--	--	--	Zona pellucida-like domain;; CUB domain	ZP domain-containing protein {ECO:0000303|PubMed:23765379} (Precursor) OS=Acropora millepora (Staghorn coral) PE=1 SV=1	PREDICTED: deleted in malignant brain tumors 1 protein-like [Crassostrea gigas]
TR21377_c0_g1	[R]	General function prediction only	--	K09194|4e-83|bta:523019|similar to Sp4 transcription factor	[R]	General function prediction only	Zinc-finger double domain;; Zinc finger, C2H2 type;; C2H2-type zinc finger	Transcription factor btd GN=btd OS=Drosophila melanogaster (Fruit fly) PE=2 SV=1	PREDICTED: transcription factor Sp3-like isoform X1 [Aplysia californica]
TR14547_c0_g1	--	--	--	--	--	--	Ependymin	--	hypothetical protein LOTGIDRAFT_154656 [Lottia gigantea]
TR39322_c1_g1	--	--	--	--	[V]	Defense mechanisms	LBP / BPI / CETP family, C-terminal domain;; LBP / BPI / CETP family, N-terminal domain	Uncharacterized protein T19C3.5 (Precursor) GN=T19C3.5 OS=Caenorhabditis elegans PE=1 SV=2	bactericidal permeability-increasing protein/lipopolysaccharide-binding protein [Scapharca broughtonii]
TR6991_c0_g1	[GO]	--	--	--	[F]	Nucleotide transport and metabolism	GDA1/CD39 (nucleoside phosphatase) family	Nucleoside-diphosphatase mig-23 GN=mig-23 OS=Caenorhabditis elegans PE=1 SV=2	PREDICTED: ectonucleoside triphosphate diphosphohydrolase 1-like [Aplysia californica]
TR38313_c0_g1	[R]	General function prediction only	Molecular Function: transferase activity (GO:0016740);; Biological Process: primary metabolic process (GO:0044238);; Biological Process: cellular macromolecule metabolic process (GO:0044260);; Biological Process: cellular component organization or biogenesis (GO:0071840);;	K14554|0.0|bfo:BRAFLDRAFT_276592|hypothetical protein	[R]	General function prediction only	Utp21 specific WD40 associated putative domain;; WD domain, G-beta repeat;; Anaphase-promoting complex subunit 4 WD40 domain	Katanin p80 WD40 repeat-containing subunit B1 {ECO:0000255|HAMAP-Rule:MF_03022} OS=Strongylocentrotus purpuratus (Purple sea urchin) PE=1 SV=1	hypothetical protein LOTGIDRAFT_215492 [Lottia gigantea]
TR27922_c0_g1	--	--	--	--	--	--	--	Protein dopey homolog PFC0245c GN=PFC0245c OS=Plasmodium falciparum (isolate 3D7) PE=2 SV=1	--
TR57414_c0_g1	[R]	General function prediction only	--	--	[BK]	--	Macro domain	--	PREDICTED: poly [ADP-ribose] polymerase 14-like [Crassostrea gigas]
TR54843_c0_g1	--	--	--	--	[R]	General function prediction only	--	Probable RNA-directed DNA polymerase from transposon X-element GN=X-element\ORF2 OS=Drosophila melanogaster (Fruit fly) PE=3 SV=1	PREDICTED: RNA-directed DNA polymerase from mobile element jockey-like [Saccoglossus kowalevskii]
TR58736_c0_g2	--	--	--	--	[T]	Signal transduction mechanisms	--	Putative uncharacterized protein DDB_G0290521 (Precursor) GN=DDB_G0290521 OS=Dictyostelium discoideum (Slime mold) PE=3 SV=2	hypothetical protein BRAFLDRAFT_122816 [Branchiostoma floridae]
TR47673_c0_g2	--	--	Molecular Function: transferase activity (GO:0016740);;	K08654|1e-17|aml:100482021|proprotein convertase subtilisin/kexin type 5-like	[O]	Posttranslational modification, protein turnover, chaperones	Giardia variant-specific surface protein	Major surface-labeled trophozoite antigen 417 (Precursor) OS=Giardia intestinalis (Giardia lamblia) PE=2 SV=1	hypothetical protein EIN_137670, partial [Entamoeba invadens IP1]
TR3752_c0_g1	--	--	Molecular Function: inositol 1,4,5-trisphosphate-sensitive calcium-release channel activity (GO:0005220);; Cellular Component: endoplasmic reticulum (GO:0005783);; Cellular Component: integral component of membrane (GO:0016021);; Biological Process: inositol phosphate-mediated signaling (GO:0048016);; Biological Process: calcium ion transmembrane transport (GO:0070588);;	--	--	--	--	--	Inositol 1,4,5-trisphosphate receptor type 2 [Crassostrea gigas]
TR37422_c0_g1	--	--	--	--	--	--	--	Putative uncharacterized protein DDB_G0289981 GN=DDB_G0289981 OS=Dictyostelium discoideum (Slime mold) PE=4 SV=1	--
TR47074_c0_g1	--	--	--	--	[W]	Extracellular structures	--	Transmembrane matrix receptor MUP-4 {ECO:0000312|EMBL:AAK69172.1} (Precursor) OS=Caenorhabditis elegans PE=1 SV=4	hypothetical protein LOTGIDRAFT_107831, partial [Lottia gigantea]
TR17347_c0_g1	--	--	--	--	--	--	--	Uncharacterized protein DDB_G0286299 GN=DDB_G0286299 OS=Dictyostelium discoideum (Slime mold) PE=4 SV=1	--
TR22446_c0_g1	--	--	--	--	--	--	Caspase recruitment domain	--	--
TR31918_c2_g1	[S]	Function unknown	Molecular Function: nucleotide binding (GO:0000166);; Molecular Function: transferase activity, transferring phosphorus-containing groups (GO:0016772);; Biological Process: cellular process (GO:0044763);;	--	[S]	Function unknown	Leucine rich repeat;; Leucine Rich repeats (2 copies)	Ras guanine nucleotide exchange factor V GN=gefV OS=Dictyostelium discoideum (Slime mold) PE=2 SV=1	leucine-rich repeat-containing protein [Polysphondylium pallidum PN500]
TR51328_c1_g1	--	--	Molecular Function: transferase activity (GO:0016740);;	K00698|3e-26|bfo:BRAFLDRAFT_84722|hypothetical protein	[M]	Cell wall/membrane/envelope biogenesis	--	--	Chitin synthase C [Crassostrea gigas]
TR16306_c0_g1	--	--	--	--	[TV]	--	Sushi repeat (SCR repeat);; Hormone receptor domain;; Sushi repeat (SCR repeat)	Locomotion-related protein Hikaru genki (Precursor) GN=hig OS=Drosophila melanogaster (Fruit fly) PE=1 SV=2	hypothetical protein BRAFLDRAFT_103544 [Branchiostoma floridae]
TR35826_c1_g1	--	--	--	K08008|9e-45|bfo:BRAFLDRAFT_129254|hypothetical protein	[PQ]	--	Ferric reductase like transmembrane component	Superoxide-generating NADPH oxidase heavy chain subunit B GN=noxB OS=Dictyostelium discoideum (Slime mold) PE=2 SV=1	PREDICTED: cytochrome b-245 heavy chain-like, partial [Crassostrea gigas]
TR11459_c0_g1	--	--	--	--	--	--	Domain of unknown function (DUF4559)	--	PREDICTED: uncharacterized protein LOC100377645 [Saccoglossus kowalevskii]
TR19639_c0_g1	[R]	General function prediction only	Molecular Function: GTP binding (GO:0005525);; Biological Process: small GTPase mediated signal transduction (GO:0007264);; Cellular Component: membrane (GO:0016020);;	--	[R]	General function prediction only	Ras family	Ras-like protein rasD (Precursor) GN=rasD OS=Dictyostelium discoideum (Slime mold) PE=2 SV=2	Ras-related and estrogen-regulated growth inhibitor-like protein [Crassostrea gigas]
TR43512_c0_g1	--	--	Molecular Function: microtubule motor activity (GO:0003777);; Molecular Function: actin binding (GO:0003779);; Molecular Function: NAD+ kinase activity (GO:0003951);; Molecular Function: diacylglycerol kinase activity (GO:0004143);; Molecular Function: ATP binding (GO:0005524);; Biological Process: microtubule-based movement (GO:0007018);; Biological Process: protein kinase C-activating G-protein…	--	[Z]	Cytoskeleton	Dynein heavy chain, N-terminal region 2	Dynein beta chain, ciliary OS=Tripneustes gratilla (Hawaian sea urchin) PE=1 SV=1	PREDICTED: dynein heavy chain 10, axonemal-like [Aplysia californica]
TR850_c0_g1	--	--	--	--	[T]	Signal transduction mechanisms	--	--	hypothetical protein LOTGIDRAFT_236958 [Lottia gigantea]
TR26855_c2_g2	--	--	Molecular Function: nucleic acid binding (GO:0003676);; Molecular Function: metal ion binding (GO:0046872);;	--	[R]	General function prediction only	Zinc-finger double domain;; Zinc finger, C2H2 type;; C2H2-type zinc finger;; Drought induced 19 protein (Di19), zinc-binding;; C2H2-type zinc-finger domain	ABC transporter F family member 4 GN=abcF4 OS=Dictyostelium discoideum (Slime mold) PE=3 SV=1	PREDICTED: enolase-phosphatase E1-like [Crassostrea gigas]
TR34072_c0_g1	--	--	--	--	--	--	YqaJ-like viral recombinase domain	--	predicted protein [Nematostella vectensis]
TR58833_c0_g1	--	--	Molecular Function: motor activity (GO:0003774);; Molecular Function: actin binding (GO:0003779);; Molecular Function: ATP binding (GO:0005524);; Cellular Component: brush border (GO:0005903);; Cellular Component: cell cortex (GO:0005938);; Biological Process: determination of left/right symmetry (GO:0007368);; Biological Process: mesoderm development (GO:0007498);; Biological Process: metabolic …	--	[Z]	Cytoskeleton	Myosin head (motor domain)	Myosin-IB GN=Myo61F OS=Drosophila melanogaster (Fruit fly) PE=1 SV=3	hypothetical protein LOTGIDRAFT_180353 [Lottia gigantea]
TR29124_c0_g1	--	--	Molecular Function: metal ion binding (GO:0046872);;	--	[O]	Posttranslational modification, protein turnover, chaperones	RING-type zinc-finger;; zinc-RING finger domain;; Prokaryotic RING finger family 4;; Zinc finger, C3HC4 type (RING finger)	Regulation of longevity by E3 ubiquitin-protein ligase OS=Caenorhabditis elegans PE=1 SV=4	hypothetical protein BRAFLDRAFT_68819 [Branchiostoma floridae]
TR44551_c0_g1	--	--	--	--	--	--	CAP-Gly domain	--	PREDICTED: reticulocyte-binding protein 2 homolog a-like isoform X5 [Crassostrea gigas]
TR52040_c1_g1	--	--	--	--	--	--	IQ calmodulin-binding motif;; Regulatory subunit of type II PKA R-subunit;; Inner membrane component of T3SS, cytoplasmic domain;; Starch/carbohydrate-binding module (family 53)	Probable inactive protein kinase DDB_G0270444 GN=DDB_G0270444 OS=Dictyostelium discoideum (Slime mold) PE=1 SV=1	PREDICTED: abnormal spindle-like microcephaly-associated protein homolog isoform X7 [Crassostrea gigas]
TR54620_c0_g1	--	--	--	--	--	--	Domain of unknown function (DUF4500)	--	PREDICTED: small integral membrane protein 8-like [Crassostrea gigas]
TR33755_c0_g1	[L]	Replication, recombination and repair	Molecular Function: catalytic activity (GO:0003824);; Molecular Function: binding (GO:0005488);; Biological Process: DNA metabolic process (GO:0006259);;	--	[R]	General function prediction only	Reverse transcriptase (RNA-dependent DNA polymerase)	Endonuclease GN=pol OS=Drosophila melanogaster (Fruit fly) PE=3 SV=1	putative pol protein [Adineta vaga]
TR23706_c0_g2	--	--	Molecular Function: DNA binding (GO:0003677);; Molecular Function: metal ion binding (GO:0046872);;	K09378|8e-30|oaa:100077016|ZFHX3	[R]	General function prediction only	--	Zinc finger protein 2 GN=zfh2 OS=Drosophila melanogaster (Fruit fly) PE=1 SV=2	PREDICTED: zinc finger homeobox protein 4-like [Crassostrea gigas]
TR38250_c0_g2	--	--	--	--	--	--	Mitochondria-eating protein	--	PREDICTED: uncharacterized protein LOC105322801 [Crassostrea gigas]
TR57352_c0_g1	[S]	Function unknown	--	--	[T]	Signal transduction mechanisms	Leucine rich repeat;; Leucine rich repeats (6 copies);; Leucine Rich repeats (2 copies)	Leucine-rich repeat-containing protein egg-6 (Precursor) OS=Caenorhabditis elegans PE=2 SV=2	PREDICTED: leucine-rich repeats and immunoglobulin-like domains protein 1 [Crassostrea gigas]
TR32791_c0_g1	--	--	--	K05701|0.0|phu:Phum_PHUM359090|tight junction protein tama, putative	[T]	Signal transduction mechanisms	PDZ domain (Also known as DHR or GLGF);; PDZ domain;; Guanylate kinase;; Variant SH3 domain	Disks large 1 tumor suppressor protein GN=dlg1 OS=Drosophila melanogaster (Fruit fly) PE=1 SV=2	PREDICTED: uncharacterized protein LOC105334159 isoform X2 [Crassostrea gigas]
TR7538_c1_g1	--	--	--	--	--	--	DBF zinc finger;; C2H2-type zinc finger	Kinesin-related protein 4 GN=kif4 OS=Dictyostelium discoideum (Slime mold) PE=2 SV=1	PREDICTED: girdin-like [Crassostrea gigas]
TR51193_c0_g1	--	--	Molecular Function: hydrolase activity (GO:0016787);;	--	[T]	Signal transduction mechanisms	--	Inactive rhomboid protein 1 GN=rho-5 OS=Drosophila melanogaster (Fruit fly) PE=2 SV=1	PREDICTED: inactive rhomboid protein 1-like [Crassostrea gigas]
TR46122_c0_g1	--	--	--	--	[G]	Carbohydrate transport and metabolism	Myb/SANT-like DNA-binding domain	Uncharacterized protein DDB_G0271670 (Precursor) GN=DDB_G0271670 OS=Dictyostelium discoideum (Slime mold) PE=3 SV=1	PREDICTED: hypothetical protein LOC100742354 [Bombus impatiens]
TR21331_c0_g1	--	--	--	--	--	--	YqaJ-like viral recombinase domain;; SAP domain;; Herpesvirus alkaline exonuclease	--	PREDICTED: uncharacterized protein LOC105327838 [Crassostrea gigas]
TR59005_c0_g1	--	--	--	K11274|2e-24|spu:579841|similar to LOC397870 protein	--	--	--	--	PREDICTED: uncharacterized protein LOC105331592 isoform X1 [Crassostrea gigas]
TR16804_c0_g1	--	--	--	--	--	--	Poxvirus A32 protein	--	hypothetical protein TcasGA2_TC001828 [Tribolium castaneum]
TR10430_c1_g2	--	--	Molecular Function: actin binding (GO:0003779);; Molecular Function: Rho GTPase binding (GO:0017048);; Biological Process: actin cytoskeleton organization (GO:0030036);;	--	[TZ]	--	Diaphanous GTPase-binding Domain	Formin-like protein CG32138 GN=CG32138 OS=Drosophila melanogaster (Fruit fly) PE=1 SV=3	PREDICTED: formin-like protein CG32138-like isoform X3 [Aplysia californica]
TR45032_c0_g1	--	--	--	--	--	--	Sushi repeat (SCR repeat);; Hormone receptor domain	--	PREDICTED: uncharacterized protein LOC100641648 [Amphimedon queenslandica]
TR11010_c0_g1	--	--	Molecular Function: catalytic activity (GO:0003824);;	K01310|4e-48|xtr:496968|ctrb2, ctrl	[E]	Amino acid transport and metabolism	Trypsin	Trypsin-7 (Precursor) GN=TRYP7 OS=Anopheles gambiae (African malaria mosquito) PE=2 SV=2	Chymotrypsin-like serine proteinase [Crassostrea gigas]
TR16370_c0_g2	[R]	General function prediction only	Molecular Function: nucleotide binding (GO:0000166);;	K14538|1e-168|bfo:BRAFLDRAFT_63599|hypothetical protein	[R]	General function prediction only	50S ribosome-binding GTPase;; Ferrous iron transport protein B;; GNL3L/Grn1 putative GTPase	Guanine nucleotide-binding protein-like 3 homolog GN=nst-1 OS=Caenorhabditis elegans PE=3 SV=1	Guanine nucleotide-binding protein-like 3-like protein, partial [Crassostrea gigas]
TR9727_c0_g1	--	--	--	--	--	--	--	--	hypothetical protein LOTGIDRAFT_161998 [Lottia gigantea]
TR23783_c0_g1	--	--	Cellular Component: intracellular part (GO:0044424);;	--	--	--	Shoulder domain;; Major Vault Protein repeat;; Domain of unknown function (DUF3601)	Major vault protein GN=Tc00.1047053510353.10 OS=Trypanosoma cruzi (strain CL Brener) PE=3 SV=1	PREDICTED: major vault protein-like [Aplysia californica]
TR20261_c0_g1	[K]	Transcription	Cellular Component: nucleus (GO:0005634);; Biological Process: DNA-templated transcription, initiation (GO:0006352);;	K03134|4e-52|aml:100479755|transcription initiation factor TFIID subunit 10-like	[K]	Transcription	Transcription initiation factor TFIID 23-30kDa subunit	Transcription initiation factor TFIID subunit 10b OS=Drosophila melanogaster (Fruit fly) PE=1 SV=1	PREDICTED: transcription initiation factor TFIID subunit 10-like isoform X2 [Crassostrea gigas]
TR40514_c0_g2	--	--	--	--	--	--	--	--	hypothetical protein DAPPUDRAFT_116839 [Daphnia pulex]
TR8692_c0_g1	[C]	Energy production and conversion	Molecular Function: lipid binding (GO:0008289);; Cellular Component: chloroplast thylakoid membrane (GO:0009535);; Molecular Function: hydrogen ion transmembrane transporter activity (GO:0015078);; Biological Process: ATP synthesis coupled proton transport (GO:0015986);; Biological Process: ATP hydrolysis coupled proton transport (GO:0015991);; Cellular Component: integral component of membrane (…	K02128|2e-06|cin:100182289|similar to ATP synthase lipid-binding protein, mitochondrial precursor (ATP synthase proteolipid P1) (ATPase protein 9) (ATPase subunit c)	[C]	Energy production and conversion	ATP synthase subunit C	ATP synthase subunit C, organellar chromatophore GN=PCC_0201 OS=Paulinella chromatophora PE=3 SV=1	ATP synthase CF0 C chain [Bigelowiella natans]
TR12255_c0_g1	[P]	Inorganic ion transport and metabolism	Molecular Function: inositol monophosphate phosphatase activity (GO:0052834);;	--	[T]	Signal transduction mechanisms	Inositol monophosphatase family	Putative inositol monophosphatase 3 GN=CG15743 OS=Drosophila melanogaster (Fruit fly) PE=2 SV=1	PREDICTED: inositol monophosphatase 3-like isoform X2 [Crassostrea gigas]
TR55414_c1_g1	[R]	General function prediction only	--	--	[S]	Function unknown	--	Autophagy-related protein 18 GN=atg18 OS=Dictyostelium discoideum (Slime mold) PE=3 SV=1	PREDICTED: WD repeat domain phosphoinositide-interacting protein 2-like isoform X2 [Crassostrea gigas]
TR55972_c0_g1	--	--	--	K04438|1e-39|api:100164632|similar to Adapter molecule Crk	[T]	Signal transduction mechanisms	SH2 domain;; Variant SH3 domain	Adapter molecule Crk GN=Crk OS=Drosophila melanogaster (Fruit fly) PE=1 SV=1	PREDICTED: adapter molecule Crk-like [Aplysia californica]
TR23435_c0_g1	--	--	--	--	--	--	--	--	PREDICTED: uncharacterized protein LOC105330279 [Crassostrea gigas]
TR15948_c0_g1	[R]	General function prediction only	--	--	[T]	Signal transduction mechanisms	Ankyrin repeats (many copies);; Ankyrin repeats (3 copies);; Ankyrin repeat;; Ankyrin repeats (many copies);; Ankyrin repeat	Transient receptor potential cation channel subfamily A member 1 GN=TrpA1 OS=Drosophila melanogaster (Fruit fly) PE=2 SV=4	Transient receptor potential cation channel subfamily A member 1-like protein [Crassostrea gigas]
TR55816_c0_g2	--	--	--	K12654|1e-12|dre:570872|hypothetical LOC570872	--	--	Transmembrane protein 173;; TIR domain;; TIR domain	--	PREDICTED: uncharacterized protein LOC105321929, partial [Crassostrea gigas]
TR5769_c0_g1	--	--	--	--	--	--	--	--	PREDICTED: ribosomal protein S6 kinase delta-1-like isoform X2 [Crassostrea gigas]
TR10370_c4_g2	--	--	--	--	--	--	--	--	unnamed protein product [Oikopleura dioica]
TR48489_c0_g1	[L]	Replication, recombination and repair	--	--	[O]	Posttranslational modification, protein turnover, chaperones	--	Major antigen GN=OVT1 OS=Onchocerca volvulus PE=2 SV=2	PREDICTED: transcription intermediary factor 1-alpha-like [Crassostrea gigas]
TR4859_c1_g1	--	--	--	--	--	--	--	--	predicted protein [Nematostella vectensis]
TR11649_c1_g1	--	--	--	K08376|6e-22|tca:657291|Ccapr1, Ccapr	[R]	General function prediction only	7 transmembrane receptor (rhodopsin family);; Serpentine type 7TM GPCR chemoreceptor Srsx	Cardioacceleratory peptide receptor GN=CCAP-R OS=Drosophila melanogaster (Fruit fly) PE=2 SV=3	crustacean cardioactive peptide receptor, partial [Cancer borealis]
TR36941_c0_g1	--	--	--	--	[R]	General function prediction only	S phase cyclin A-associated protein in the endoplasmic reticulum	--	S phase cyclin A-associated protein in the endoplasmic reticulum [Crassostrea gigas]
TR48080_c0_g1	--	--	--	--	[R]	General function prediction only	Reverse transcriptase (RNA-dependent DNA polymerase)	Endonuclease (Fragment) OS=Nasonia vitripennis (Parasitic wasp) PE=3 SV=2	PREDICTED: uncharacterized protein LOC102810040 [Saccoglossus kowalevskii]
TR30567_c0_g1	[O]	Posttranslational modification, protein turnover, chaperones	Cellular Component: proteasome complex (GO:0000502);; Molecular Function: ATP binding (GO:0005524);; Cellular Component: cytoplasm (GO:0005737);; Biological Process: proteolysis (GO:0006508);; Molecular Function: peptidase activity (GO:0008233);; Biological Process: protein catabolic process (GO:0030163);;	K03064|0.0|nvi:100117671|NV13405	[O]	Posttranslational modification, protein turnover, chaperones	ATPase family associated with various cellular activities (AAA);; AAA ATPase domain;; AAA domain (Cdc48 subfamily);; AAA domain;; AAA domain (dynein-related subfamily);; Holliday junction DNA helicase ruvB N-terminus	Probable 26S protease regulatory subunit 10B GN=rpt-4 OS=Caenorhabditis elegans PE=1 SV=2	hypothetical protein CAPTEDRAFT_149757 [Capitella teleta]
TR11418_c0_g1	--	--	--	K10077|4e-08|dre:564995|layna, si:dkey-27p23.2	[TV]	--	Lectin C-type domain	--	hypothetical protein CAPTEDRAFT_78146, partial [Capitella teleta]
TR19731_c0_g1	--	--	Molecular Function: peptidase activity (GO:0008233);; Molecular Function: metal ion binding (GO:0046872);;	--	[RP]	--	Thrombospondin type 1 domain	Mucin-like protein {ECO:0000303|PubMed:23765379} (Fragment) OS=Acropora millepora (Staghorn coral) PE=1 SV=1	hypothetical protein BRAFLDRAFT_243217 [Branchiostoma floridae]
TR36193_c0_g2	--	--	Molecular Function: alpha-amylase activity (GO:0004556);; Biological Process: carbohydrate metabolic process (GO:0005975);; Molecular Function: metal ion binding (GO:0046872);;	K01176|4e-43|xla:379600|amy2b, MGC64337	[G]	Carbohydrate transport and metabolism	--	Alpha-amylase (Precursor) OS=Pecten maximus (King scallop) PE=2 SV=1	alpha-amylase [Hyriopsis cumingii]
TR5396_c0_g1	--	--	--	--	--	--	--	Protein rolling stone GN=rost OS=Drosophila melanogaster (Fruit fly) PE=2 SV=2	PREDICTED: protein rolling stone-like [Crassostrea gigas]
TR49029_c0_g1	--	--	--	--	--	--	--	Uncharacterized protein PFB0145c GN=PFB0145c OS=Plasmodium falciparum (isolate 3D7) PE=2 SV=1	hypothetical protein TcasGA2_TC010007 [Tribolium castaneum]
TR37327_c1_g1	--	--	--	--	[GO]	--	WSC domain	Xylosyltransferase oxt GN=oxt OS=Drosophila melanogaster (Fruit fly) PE=2 SV=1	hypothetical protein HELRODRAFT_163140 [Helobdella robusta]
TR26072_c0_g1	--	--	--	--	--	--	--	--	clam ADP-ribosylating protein CARP-1 [Meretrix lamarckii]
TR1933_c0_g1	--	--	Molecular Function: ionotropic glutamate receptor activity (GO:0004970);; Molecular Function: extracellular-glutamate-gated ion channel activity (GO:0005234);; Cellular Component: integral component of membrane (GO:0016021);; Cellular Component: cell junction (GO:0030054);; Biological Process: ion transmembrane transport (GO:0034220);; Biological Process: ionotropic glutamate receptor signaling p…	K05198|3e-16|cfa:482667|GRIA2	[PET]	--	--	Glutamate receptor (Precursor) OS=Lymnaea stagnalis (Great pond snail) PE=2 SV=1	PREDICTED: glutamate receptor-like [Crassostrea gigas]
TR21824_c0_g1	--	--	--	--	[I]	Lipid transport and metabolism	Emopamil binding protein	--	PREDICTED: uncharacterized protein LOC105322314 [Crassostrea gigas]
TR31378_c0_g1	[R]	General function prediction only	--	--	[R]	General function prediction only	--	--	n-acyl-phosphatidylethanolamine-hydrolyzing phospholipase d [Ascaris suum]
TR35297_c0_g1	--	--	--	--	--	--	Endonuclease/Exonuclease/phosphatase family	--	pol-like protein [Ciona intestinalis]
TR32044_c0_g1	--	--	--	--	--	--	EGF-like domain;; EGF-like domain	Fibropellin-1 (Precursor) GN=EGF1 OS=Strongylocentrotus purpuratus (Purple sea urchin) PE=1 SV=2	hypothetical protein TRIADDRAFT_35120 [Trichoplax adhaerens]
TR18183_c0_g2	--	--	--	--	[T]	Signal transduction mechanisms	--	Cell death abnormality protein 1 {ECO:0000303|PubMed:11163239} (Precursor) OS=Caenorhabditis elegans PE=1 SV=1	PREDICTED: multiple epidermal growth factor-like domains protein 11 [Crassostrea gigas]
TR8267_c2_g1	[O]	Posttranslational modification, protein turnover, chaperones	Biological Process: ubiquitin-dependent protein catabolic process (GO:0006511);; Molecular Function: cysteine-type peptidase activity (GO:0008234);; Molecular Function: zinc ion binding (GO:0008270);; Molecular Function: thiol-dependent ubiquitinyl hydrolase activity (GO:0036459);;	--	[O]	Posttranslational modification, protein turnover, chaperones	Ubiquitin carboxyl-terminal hydrolase	Ubiquitin hydrolase B GN=ubpB OS=Dictyostelium discoideum (Slime mold) PE=1 SV=1	Ubiquitin carboxyl-terminal hydrolase 44 [Crassostrea gigas]
TR28828_c0_g1	--	--	--	--	[TW]	--	--	--	PREDICTED: armadillo repeat-containing protein 2-like isoform X2 [Crassostrea gigas]
TR31579_c0_g1	[L]	Replication, recombination and repair	Molecular Function: catalytic activity (GO:0003824);; Molecular Function: binding (GO:0005488);; Biological Process: DNA metabolic process (GO:0006259);;	--	[R]	General function prediction only	--	Endonuclease GN=pol OS=Drosophila melanogaster (Fruit fly) PE=3 SV=1	RNA directed DNA polymerase reverse transcriptase, partial [Echinococcus granulosus]
TR29311_c1_g1	[Z]	Cytoskeleton	Molecular Function: GTPase activity (GO:0003924);; Molecular Function: structural constituent of cytoskeleton (GO:0005200);; Molecular Function: GTP binding (GO:0005525);; Cellular Component: cytoplasm (GO:0005737);; Cellular Component: microtubule (GO:0005874);; Biological Process: microtubule-based process (GO:0007017);; Biological Process: metabolic process (GO:0008152);; Biological Process: p…	--	[Z]	Cytoskeleton	Tubulin/FtsZ family, GTPase domain	Tubulin beta chain OS=Paracentrotus lividus (Common sea urchin) PE=2 SV=1	hypothetical protein D910_04887, partial [Dendroctonus ponderosae]
TR48661_c7_g1	--	--	Molecular Function: electron carrier activity (GO:0009055);; Molecular Function: protein disulfide oxidoreductase activity (GO:0015035);; Biological Process: intracellular signal transduction (GO:0035556);; Biological Process: cell redox homeostasis (GO:0045454);; Biological Process: oxidation-reduction process (GO:0055114);;	--	--	--	Protein of unknown function, DUF547;; Domain found in Dishevelled, Egl-10, and Pleckstrin (DEP);; Glutaredoxin	--	PREDICTED: uncharacterized protein LOC105347460 isoform X2 [Crassostrea gigas]
TR10456_c6_g1	--	--	--	--	--	--	--	--	PREDICTED: rootletin-like isoform X8 [Crassostrea gigas]
TR18187_c0_g1	--	--	--	--	[OR]	--	Serine carboxypeptidase S28	Putative serine protease K12H4.7 (Precursor) GN=K12H4.7 OS=Caenorhabditis elegans PE=3 SV=2	Putative serine protease F56F10.1 [Crassostrea gigas]
TR28777_c0_g1	--	--	--	--	--	--	Mitochondria-eating protein	--	PREDICTED: myosin-9-like [Crassostrea gigas]
TR1887_c0_g1	--	--	--	--	--	--	Sushi repeat (SCR repeat)	--	--
TR15884_c0_g2	--	--	Biological Process: DNA repair (GO:0006281);; Molecular Function: hydrolase activity, hydrolyzing N-glycosyl compounds (GO:0016799);;	K03649|4e-45|isc:IscW_ISCW008783|G/T mismatch-specific thymine DNA glycosylase, putative	[L]	Replication, recombination and repair	Uracil DNA glycosylase superfamily	--	PREDICTED: uncharacterized protein LOC105344766 [Crassostrea gigas]
TR17872_c1_g1	--	--	--	--	--	--	Mitochondria-eating protein	Myb-like protein X GN=mybX OS=Dictyostelium discoideum (Slime mold) PE=3 SV=1	PREDICTED: uncharacterized protein LOC105336324 isoform X1 [Crassostrea gigas]
TR57339_c0_g2	[I]	Lipid transport and metabolism	--	--	[R]	General function prediction only	Acyltransferase family	Nose resistant to fluoxetine protein 6 (Precursor) GN=nrf-6 OS=Caenorhabditis elegans PE=1 SV=3	PREDICTED: nose resistant to fluoxetine protein 6-like [Crassostrea gigas]
TR10360_c0_g1	--	--	Cellular Component: extracellular region (GO:0005576);; Biological Process: acute-phase response (GO:0006953);;	--	--	--	Serum amyloid A protein	--	serum amyloid A precursor [Crassostrea hongkongensis]
TR29835_c0_g1	[R]	General function prediction only	--	--	[R]	General function prediction only	WD domain, G-beta repeat;; Anaphase-promoting complex subunit 4 WD40 domain	Lissencephaly-1 homolog 2 {ECO:0000255|HAMAP-Rule:MF_03141} GN=GSPATT00007594001 OS=Paramecium tetraurelia PE=3 SV=1	PREDICTED: WD repeat-containing protein 7-like isoform X2 [Crassostrea gigas]
TR50136_c0_g1	--	--	--	--	--	--	LITAF-like zinc ribbon domain	Cell death-inducing p53-target protein 1 homolog GN=litaf OS=Dictyostelium discoideum (Slime mold) PE=3 SV=1	PREDICTED: cell death-inducing p53-target protein 1-like isoform X1 [Crassostrea gigas]
TR36780_c0_g1	--	--	--	--	--	--	Cation-independent mannose-6-phosphate receptor repeat	--	hypothetical protein LOTGIDRAFT_231217 [Lottia gigantea]
TR30067_c0_g1	--	--	--	--	[U]	Intracellular trafficking, secretion, and vesicular transport	Mitochondria-eating protein	Uncharacterized protein PFB0145c GN=PFB0145c OS=Plasmodium falciparum (isolate 3D7) PE=2 SV=1	PREDICTED: myosin-9-like [Crassostrea gigas]
TR36249_c1_g3	--	--	--	--	[RP]	--	Thrombospondin type 1 domain;; Scavenger receptor cysteine-rich domain	Coadhesin {ECO:0000303|PubMed:23765379} (Fragment) OS=Acropora millepora (Staghorn coral) PE=1 SV=1	hypothetical protein BRAFLDRAFT_85664 [Branchiostoma floridae]
TR58436_c0_g1	[S]	Function unknown	--	--	--	--	AAA domain;; Histidine-specific methyltransferase, SAM-dependent	--	PREDICTED: uncharacterized protein LOC105345193 [Crassostrea gigas]
TR9004_c0_g1	[RTKL]	--	Molecular Function: transferase activity, transferring phosphorus-containing groups (GO:0016772);;	--	[T]	Signal transduction mechanisms	Protein tyrosine kinase;; Protein kinase domain	Fibroblast growth factor receptor (Precursor) GN=FGFR OS=Halocynthia roretzi (Sea squirt) PE=2 SV=1	PREDICTED: uncharacterized protein LOC105348641 [Crassostrea gigas]
TR7242_c0_g1	--	--	Molecular Function: guanyl-nucleotide exchange factor activity (GO:0005085);; Molecular Function: inorganic anion exchanger activity (GO:0005452);; Cellular Component: integral component of membrane (GO:0016021);; Biological Process: positive regulation of GTPase activity (GO:0043547);; Biological Process: anion transmembrane transport (GO:0098656);;	--	[P]	Inorganic ion transport and metabolism	HCO3- transporter family	--	Electroneutral sodium bicarbonate exchanger 1 [Crassostrea gigas]
TR42756_c0_g1	--	--	--	--	--	--	--	--	hypothetical protein CGI_10019693 [Crassostrea gigas]
TR25485_c0_g1	--	--	--	--	--	--	--	Uncharacterized protein DDB_G0271670 (Precursor) GN=DDB_G0271670 OS=Dictyostelium discoideum (Slime mold) PE=3 SV=1	hypothetical protein LOTGIDRAFT_158006 [Lottia gigantea]
TR12012_c0_g2	[L]	Replication, recombination and repair	--	--	[R]	General function prediction only	Integrase core domain	Endonuclease GN=POL OS=Drosophila melanogaster (Fruit fly) PE=3 SV=1	PREDICTED: uncharacterized protein LOC105331269 [Crassostrea gigas]
TR29848_c2_g1	--	--	Molecular Function: nucleic acid binding (GO:0003676);; Cellular Component: nucleus (GO:0005634);; Molecular Function: zinc ion binding (GO:0008270);;	--	[R]	General function prediction only	Zinc-finger double-stranded RNA-binding;; Zinc-finger of C2H2 type;; U1 zinc finger	Putative zinc finger protein ZK686.4 GN=ZK686.4 OS=Caenorhabditis elegans PE=4 SV=1	PREDICTED: zinc finger matrin-type protein 2-like [Crassostrea gigas]
TR33862_c0_g1	--	--	--	--	--	--	--	--	PREDICTED: uncharacterized protein LOC105342521 [Crassostrea gigas]
TR19759_c0_g1	--	--	--	--	--	--	--	--	proteophosphoglycan 5 [Leishmania major strain Friedlin]
TR47019_c0_g1	[G]	Carbohydrate transport and metabolism	Molecular Function: catalytic activity (GO:0003824);; Biological Process: metabolic process (GO:0008152);;	K00697|4e-23|aga:AgaP_AGAP008227|AGAP008227-PA	[G]	Carbohydrate transport and metabolism	Glycosyltransferase family 20	Alpha,alpha-trehalose-phosphate synthase [UDP-forming] A GN=tpsA OS=Dictyostelium discoideum (Slime mold) PE=2 SV=1	PREDICTED: alpha,alpha-trehalose-phosphate synthase [UDP-forming] A-like [Ceratitis capitata]
TR22793_c0_g1	[R]	General function prediction only	--	K02180|0.0|bfo:BRAFLDRAFT_125481|hypothetical protein	[D]	Cell cycle control, cell division, chromosome partitioning	WD domain, G-beta repeat;; Anaphase-promoting complex subunit 4 WD40 domain	Mitotic checkpoint protein bub3 GN=bub3 OS=Dictyostelium discoideum (Slime mold) PE=3 SV=1	PREDICTED: mitotic checkpoint protein BUB3-like [Crassostrea gigas]
TR47877_c0_g2	--	--	--	--	[R]	General function prediction only	Fibrinogen beta and gamma chains, C-terminal globular domain	Techylectin-5B (Precursor) OS=Tachypleus tridentatus (Japanese horseshoe crab) PE=1 SV=1	hypothetical protein BRAFLDRAFT_88602 [Branchiostoma floridae]
TR48099_c0_g1	--	--	Molecular Function: voltage-gated calcium channel activity (GO:0005245);; Molecular Function: calcium ion binding (GO:0005509);; Cellular Component: integral component of membrane (GO:0016021);; Biological Process: regulation of ion transmembrane transport (GO:0034765);; Biological Process: calcium ion transmembrane transport (GO:0070588);;	--	--	--	--	--	PREDICTED: two pore calcium channel protein 1-like [Aplysia californica]
TR25423_c0_g1	--	--	--	--	--	--	--	101 kDa malaria antigen GN=ABRA OS=Plasmodium falciparum (isolate 3D7) PE=3 SV=1	PREDICTED: transient receptor potential cation channel subfamily M member 1-like [Crassostrea gigas]
TR36760_c1_g1	[S]	Function unknown	Molecular Function: hydrolase activity (GO:0016787);;	K04794|2e-66|isc:IscW_ISCW000602|peptidyl-tRNA hydrolase, putative (EC:3.1.1.29)	[S]	Function unknown	Peptidyl-tRNA hydrolase PTH2;; UBA/TS-N domain	Probable peptidyl-tRNA hydrolase 2 GN=C24G6.8 OS=Caenorhabditis elegans PE=3 SV=1	Putative peptidyl-tRNA hydrolase 2 [Crassostrea gigas]
TR5628_c0_g1	--	--	--	--	[T]	Signal transduction mechanisms	Eukaryotic cytochrome b561	Putative ferric-chelate reductase 1 homolog GN=CG8399 OS=Drosophila melanogaster (Fruit fly) PE=2 SV=1	PREDICTED: putative ferric-chelate reductase 1 isoform X2 [Strongylocentrotus purpuratus]
TR55338_c0_g1	--	--	--	--	[T]	Signal transduction mechanisms	EGF-like domain;; Mib_herc2	Processed neurogenic locus Notch protein (Precursor) GN=N OS=Drosophila melanogaster (Fruit fly) PE=1 SV=3	PREDICTED: IgGFc-binding protein-like isoform X2 [Crassostrea gigas]
TR39245_c5_g1	--	--	--	--	--	--	Mib_herc2	--	--
TR54539_c1_g1	--	--	--	K06270|1e-162|ecb:100060501|PPP1R12A	[OT]	--	Ankyrin repeats (many copies);; Ankyrin repeats (3 copies);; cGMP-dependent protein kinase interacting domain;; Ankyrin repeats (many copies);; Ankyrin repeat;; Ankyrin repeat	Calponin homology domain-containing protein DDB_G0272472 GN=DDB_G0272472 OS=Dictyostelium discoideum (Slime mold) PE=3 SV=1	PREDICTED: protein phosphatase 1 regulatory subunit 12A-like [Aplysia californica]
TR35962_c9_g5	[J]	Translation, ribosomal structure and biogenesis	Cellular Component: ribosome (GO:0005840);; Biological Process: ribosome biogenesis (GO:0042254);;	K02896|1e-48|xla:379128|rsl24d1, MGC53444, rlp24, rpl24, rpl24l, rvas3	[J]	Translation, ribosomal structure and biogenesis	--	Probable ribosome biogenesis protein RLP24 GN=RpL24-like OS=Drosophila melanogaster (Fruit fly) PE=1 SV=1	PREDICTED: probable ribosome biogenesis protein RLP24 [Crassostrea gigas]
TR35841_c0_g1	[D]	Cell cycle control, cell division, chromosome partitioning	--	--	--	--	--	Paramyosin GN=PRM OS=Rhipicephalus microplus (Cattle tick) PE=1 SV=1	PREDICTED: homer protein homolog 2-like isoform X10 [Crassostrea gigas]
TR56821_c0_g1	[M]	Cell wall/membrane/envelope biogenesis	Molecular Function: GDP-mannose 4,6-dehydratase activity (GO:0008446);; Biological Process: GDP-mannose metabolic process (GO:0019673);; Molecular Function: coenzyme binding (GO:0050662);;	K01711|0.0|aml:100473193|GMDS	[G]	Carbohydrate transport and metabolism	GDP-mannose 4,6 dehydratase;; NAD dependent epimerase/dehydratase family;; RmlD substrate binding domain	GDP-mannose 4,6 dehydratase GN=Gmd OS=Drosophila melanogaster (Fruit fly) PE=1 SV=2	PREDICTED: GDP-mannose 4,6 dehydratase-like isoform X2 [Crassostrea gigas]
TR19754_c0_g1	--	--	--	--	--	--	--	--	PWWP domain-containing protein 2A [Crassostrea gigas]
TR46599_c0_g1	--	--	Molecular Function: ion binding (GO:0043167);;	--	--	--	--	--	hypothetical protein CGI_10005452 [Crassostrea gigas]
TR5080_c1_g1	--	--	--	--	[S]	Function unknown	PPPDE putative peptidase domain;; PUL domain	--	PREDICTED: uncharacterized protein LOC105323839 [Crassostrea gigas]
TR36945_c0_g1	[I]	Lipid transport and metabolism	Molecular Function: oxidoreductase activity (GO:0016491);;	K13247|1e-92|tca:656318|similar to CG9914-PA	[I]	Lipid transport and metabolism	3-hydroxyacyl-CoA dehydrogenase, NAD binding domain;; 3-hydroxyacyl-CoA dehydrogenase, C-terminal domain;; NAD binding domain of 6-phosphogluconate dehydrogenase	Probable 3-hydroxyacyl-CoA dehydrogenase F54C8.1 GN=F54C8.1 OS=Caenorhabditis elegans PE=1 SV=1	PREDICTED: LOW QUALITY PROTEIN: lambda-crystallin-like [Crassostrea gigas]
TR40820_c0_g1	--	--	--	K08467|2e-14|xtr:100038048|gpr157	--	--	--	--	hypothetical protein CGI_10026442 [Crassostrea gigas]
TR43150_c0_g1	--	--	--	--	--	--	--	--	hypothetical protein CGI_10015075 [Crassostrea gigas]
TR38255_c0_g1	--	--	--	K05970|1e-157|bfo:BRAFLDRAFT_217332|hypothetical protein	--	--	Carbohydrate esterase, sialic acid-specific acetylesterase	--	Sialate O-acetylesterase [Crassostrea gigas]
TR41166_c1_g1	--	--	--	K01509|1e-108|xtr:407961|entpd2, MGC76207	[F]	Nucleotide transport and metabolism	GDA1/CD39 (nucleoside phosphatase) family	Nucleoside-diphosphatase mig-23 GN=mig-23 OS=Caenorhabditis elegans PE=1 SV=2	PREDICTED: ectonucleoside triphosphate diphosphohydrolase 2-like isoform X4 [Crassostrea gigas]
TR33425_c0_g1	[LKJ]	--	Molecular Function: nucleic acid binding (GO:0003676);; Molecular Function: helicase activity (GO:0004386);; Molecular Function: ATP binding (GO:0005524);; Biological Process: metabolic process (GO:0008152);;	K13177|0.0|ame:408794|Ddx1	[A]	RNA processing and modification	DEAD/DEAH box helicase;; Helicase conserved C-terminal domain;; SPRY domain	ATP-dependent RNA helicase Ddx1 GN=Ddx1 OS=Drosophila melanogaster (Fruit fly) PE=2 SV=1	PREDICTED: ATP-dependent RNA helicase DDX1-like [Aplysia californica]
TR48430_c0_g1	--	--	--	--	[R]	General function prediction only	--	--	PREDICTED: tRNA wybutosine-synthesizing protein 2 homolog [Saccoglossus kowalevskii]
TR11132_c0_g1	--	--	--	--	--	--	DOR family	--	PREDICTED: tumor protein p53-inducible nuclear protein 1-like isoform X1 [Crassostrea gigas]
TR16207_c1_g1	--	--	Molecular Function: hydrolase activity (GO:0016787);; Molecular Function: organic cyclic compound binding (GO:0097159);; Molecular Function: heterocyclic compound binding (GO:1901363);;	--	[A]	RNA processing and modification	--	--	PREDICTED: putative ATP-dependent RNA helicase DHX57 [Crassostrea gigas]
TR17881_c0_g1	--	--	--	--	[R]	General function prediction only	--	--	hypothetical protein BRAFLDRAFT_219602 [Branchiostoma floridae]
TR34018_c0_g1	--	--	Molecular Function: protein serine/threonine kinase activity (GO:0004674);; Molecular Function: signal transducer activity (GO:0004871);; Molecular Function: ATP binding (GO:0005524);; Biological Process: protein phosphorylation (GO:0006468);; Biological Process: signal transduction (GO:0007165);;	--	[T]	Signal transduction mechanisms	--	--	PAS domain-containing serine/threonine-protein kinase [Crassostrea gigas]
TR12297_c0_g1	--	--	--	--	--	--	Lectin C-type domain	--	hypothetical protein BRAFLDRAFT_92895 [Branchiostoma floridae]
TR23090_c0_g1	--	--	--	--	--	--	--	Uncharacterized histidine-rich protein DDB_G0274557 (Precursor) GN=DDB_G0274557 OS=Dictyostelium discoideum (Slime mold) PE=3 SV=1	hypothetical protein LOTGIDRAFT_144349, partial [Lottia gigantea]
TR19113_c0_g2	[RTKL]	--	Molecular Function: protein serine/threonine kinase activity (GO:0004674);; Molecular Function: ATP binding (GO:0005524);; Biological Process: protein phosphorylation (GO:0006468);;	K04456|0.0|api:100160970|similar to rac serine/threonine kinase	[T]	Signal transduction mechanisms	Protein kinase domain;; Protein tyrosine kinase;; PH domain;; Kinase-like;; Protein kinase C terminal domain	RAC serine/threonine-protein kinase GN=Akt1 OS=Drosophila melanogaster (Fruit fly) PE=1 SV=3	PREDICTED: RAC-alpha serine/threonine-protein kinase-like [Crassostrea gigas]
TR8999_c5_g8	--	--	--	--	--	--	--	--	PREDICTED: uncharacterized protein LOC105330279 [Crassostrea gigas]
TR28783_c2_g2	--	--	--	--	--	--	--	--	PREDICTED: transcription intermediary factor 1-alpha-like [Crassostrea gigas]
TR55420_c0_g1	--	--	--	--	--	--	TspO/MBR family	--	PREDICTED: uncharacterized protein LOC105323180 isoform X1 [Crassostrea gigas]
TR27385_c0_g1	--	--	--	--	--	--	--	--	PREDICTED: RNA-directed DNA polymerase from mobile element jockey-like [Strongylocentrotus purpuratus]
TR19725_c0_g2	--	--	--	K10691|1e-65|dre:407625|si:dkey-7c22.2	[T]	Signal transduction mechanisms	--	Protein purity of essence OS=Drosophila pseudoobscura pseudoobscura (Fruit fly) PE=3 SV=1	hypothetical protein LOTGIDRAFT_156120, partial [Lottia gigantea]
TR2037_c0_g1	--	--	--	--	--	--	--	--	pol-like protein [Ciona intestinalis]
TR57844_c0_g1	--	--	--	--	[T]	Signal transduction mechanisms	EGF-like domain;; PAN domain	Protein crumbs (Precursor) GN=crb OS=Drosophila melanogaster (Fruit fly) PE=1 SV=3	hypothetical protein BRAFLDRAFT_82678 [Branchiostoma floridae]
TR55575_c0_g1	--	--	--	--	--	--	--	Probable serine/threonine-protein kinase iksA GN=iksA OS=Dictyostelium discoideum (Slime mold) PE=3 SV=1	--
TR45118_c0_g1	--	--	--	--	[O]	Posttranslational modification, protein turnover, chaperones	Astacin (Peptidase family M12A);; CUB domain;; Lectin C-type domain	Blastula protease 10 (Precursor) GN=BP10 OS=Paracentrotus lividus (Common sea urchin) PE=2 SV=1	PREDICTED: protein SpAN-like [Crassostrea gigas]
TR40694_c0_g1	[J]	Translation, ribosomal structure and biogenesis	Molecular Function: structural constituent of ribosome (GO:0003735);; Cellular Component: ribosome (GO:0005840);; Biological Process: translation (GO:0006412);;	K02873|1e-101|bmy:Bm1_47775|60S ribosomal protein L13	[J]	Translation, ribosomal structure and biogenesis	Ribosomal protein L13e	60S ribosomal protein L13 GN=RpL13 OS=Spodoptera frugiperda (Fall armyworm) PE=2 SV=1	PREDICTED: 60S ribosomal protein L13-like [Crassostrea gigas]
TR14534_c0_g1	--	--	--	--	--	--	--	Cell death abnormality protein 1 {ECO:0000303|PubMed:11163239} (Precursor) OS=Caenorhabditis elegans PE=1 SV=1	Cytadherence high molecular weight protein 2 [Crassostrea gigas]
TR7960_c0_g1	--	--	--	--	[T]	Signal transduction mechanisms	Mab-21 protein	Protein mab-21 GN=mab-21 OS=Drosophila pseudoobscura pseudoobscura (Fruit fly) PE=3 SV=1	PREDICTED: protein mab-21-like 3-like [Saccoglossus kowalevskii]
TR9784_c0_g1	[I]	Lipid transport and metabolism	Biological Process: phospholipid biosynthetic process (GO:0008654);; Cellular Component: membrane (GO:0016020);; Molecular Function: phosphotransferase activity, for other substituted phosphate groups (GO:0016780);;	K00999|4e-82|xtr:779827|cdipt, MGC146667, pis, pis1	[I]	Lipid transport and metabolism	CDP-alcohol phosphatidyltransferase	--	CDP-diacylglycerol--inositol 3-phosphatidyltransferase, partial [Crassostrea gigas]
TR33245_c1_g1	--	--	--	--	--	--	Domain of unknown function (DUF4590)	--	PREDICTED: glutamate-rich protein 3-like isoform X4 [Crassostrea gigas]
TR50880_c0_g1	--	--	--	--	--	--	--	Troponin C, isoform 2 GN=tnc-2 OS=Caenorhabditis elegans PE=2 SV=1	hypothetical protein HELRODRAFT_185708 [Helobdella robusta]
TR41690_c0_g1	--	--	--	K12850|1e-07|hsa:55119|PRPF38B, FLJ10330, MGC163218, MGC41809, NET1, RP11-293A10.1	[R]	General function prediction only	--	Probable splicing factor, arginine/serine-rich 7 GN=rsp-7 OS=Caenorhabditis elegans PE=3 SV=3	AGAP001803-PA [Anopheles gambiae str. PEST]
TR53454_c0_g1	[RTKL]	--	Molecular Function: protein kinase C activity (GO:0004697);; Molecular Function: ATP binding (GO:0005524);; Biological Process: protein phosphorylation (GO:0006468);; Cellular Component: membrane (GO:0016020);; Biological Process: intracellular signal transduction (GO:0035556);; Molecular Function: metal ion binding (GO:0046872);;	K06068|1e-73|tca:663551|similar to CG1954-PA	[T]	Signal transduction mechanisms	Protein kinase domain;; Protein tyrosine kinase	Calcium-independent protein kinase C GN=PRKC2 OS=Aplysia californica (California sea hare) PE=1 SV=1	Calcium-independent protein kinase C, partial [Crassostrea gigas]
TR31497_c0_g1	--	--	Molecular Function: binding (GO:0005488);; Biological Process: transport (GO:0044765);;	K05641|1e-36|ecb:100054241|ABCA1	[IR]	--	--	--	PREDICTED: ATP-binding cassette sub-family A member 1-like isoform X1 [Crassostrea gigas]
TR31962_c0_g1	[R]	General function prediction only	--	--	[R]	General function prediction only	50S ribosome-binding GTPase;; Ethanolamine utilisation - propanediol utilisation;; Anaphase-promoting complex APC subunit CDC26	--	hypothetical protein LOTGIDRAFT_113712, partial [Lottia gigantea]
TR44444_c0_g1	--	--	--	--	[O]	Posttranslational modification, protein turnover, chaperones	--	--	Heat shock 70 kDa protein 12A [Crassostrea gigas]
TR22589_c0_g1	--	--	Molecular Function: nucleic acid binding (GO:0003676);; Molecular Function: protein dimerization activity (GO:0046983);;	--	[L]	Replication, recombination and repair	hAT family C-terminal dimerisation region	--	PREDICTED: zinc finger BED domain-containing protein 1-like, partial [Amphimedon queenslandica]
TR29526_c0_g1	--	--	Molecular Function: protein tyrosine phosphatase activity (GO:0004725);; Biological Process: peptidyl-tyrosine dephosphorylation (GO:0035335);;	K05693|4e-22|mmu:19274|Ptprm, KIAA4044, MGC90724, RPTPmu, mKIAA4044	[T]	Signal transduction mechanisms	Protein-tyrosine phosphatase	Receptor-type tyrosine-protein phosphatase {ECO:0000303|PubMed:9585503} (Precursor) OS=Caenorhabditis elegans PE=1 SV=1	Receptor-type tyrosine-protein phosphatase kappa [Crassostrea gigas]
TR44321_c0_g1	--	--	--	--	--	--	--	--	predicted protein [Nematostella vectensis]
TR22392_c0_g1	[E]	Amino acid transport and metabolism	--	--	[E]	Amino acid transport and metabolism	Gamma-glutamyltranspeptidase	--	PREDICTED: gamma-glutamyltranspeptidase 1-like isoform X4 [Crassostrea gigas]
TR14705_c0_g1	--	--	--	--	--	--	Inter-alpha-trypsin inhibitor heavy chain C-terminus	--	PREDICTED: inter-alpha-trypsin inhibitor heavy chain H3-like [Crassostrea gigas]
TR13856_c0_g1	--	--	--	--	--	--	--	--	ran binding protein 1, putative [Plasmodium yoelii]
TR39353_c0_g1	--	--	--	K12597|6e-42|aml:100474889|zinc finger CCHC domain-containing protein 7-like	[O]	Posttranslational modification, protein turnover, chaperones	Zinc knuckle	CCHC-type zinc finger protein CG3800 GN=CG3800 OS=Drosophila melanogaster (Fruit fly) PE=1 SV=1	hypothetical protein LOTGIDRAFT_232781 [Lottia gigantea]
TR5090_c0_g1	[J]	Translation, ribosomal structure and biogenesis	Molecular Function: ligase activity (GO:0016874);;	K01874|0.0|isc:IscW_ISCW023765|methionyl-tRNA synthetase, putative (EC:6.1.1.10)	[J]	Translation, ribosomal structure and biogenesis	tRNA synthetases class I (M);; tRNA synthetases class I (I, L, M and V);; tRNA synthetases class I (C) catalytic domain	Methionine--tRNA ligase, mitochondrial (Precursor) GN=Aats-met OS=Drosophila melanogaster (Fruit fly) PE=2 SV=2	hypothetical protein LOTGIDRAFT_223492 [Lottia gigantea]
TR49447_c1_g1	--	--	Molecular Function: catalytic activity (GO:0003824);;	K10596|4e-23|isc:IscW_ISCW012014|ubiquitination factor E4a, putative	[O]	Posttranslational modification, protein turnover, chaperones	Ubiquitin elongating factor core	--	PREDICTED: ubiquitin conjugation factor E4 A-like [Crassostrea gigas]
TR41542_c5_g4	--	--	Biological Process: protein glycosylation (GO:0006486);; Molecular Function: acetylglucosaminyltransferase activity (GO:0008375);;	K00726|1e-160|xtr:496815|mgat1	[G]	Carbohydrate transport and metabolism	GNT-I family	Putative alpha-1,3-mannosyl-glycoprotein 2-beta-N-acetylglucosaminyltransferase GN=gly-13 OS=Caenorhabditis elegans PE=2 SV=2	PREDICTED: alpha-1,3-mannosyl-glycoprotein 2-beta-N-acetylglucosaminyltransferase-like isoform X1 [Crassostrea gigas]
TR5381_c0_g1	--	--	--	--	[I]	Lipid transport and metabolism	Lipocalin / cytosolic fatty-acid binding protein family;; Lipocalin / cytosolic fatty-acid binding protein family	Fatty acid-binding protein homolog 9 GN=lbp-9 OS=Caenorhabditis elegans PE=3 SV=1	PREDICTED: fatty acid-binding protein, heart-like [Crassostrea gigas]
TR48745_c0_g1	--	--	--	--	--	--	Sushi repeat (SCR repeat);; von Willebrand factor type A domain;; von Willebrand factor type A domain	Transmembrane matrix receptor MUP-4 {ECO:0000312|EMBL:AAK69172.1} (Precursor) OS=Caenorhabditis elegans PE=1 SV=4	Sushi, von Willebrand factor type A, EGF and pentraxin domain-containing protein 1, partial [Stegodyphus mimosarum]
TR35805_c0_g1	--	--	--	--	--	--	--	--	viral A-type inclusion protein [Trichomonas vaginalis G3]
TR37469_c0_g1	--	--	--	--	--	--	Phospholipase A2	Phospholipase A2 OS=Apis dorsata (Giant honeybee) PE=1 SV=1	PREDICTED: uncharacterized protein LOC105343298 [Crassostrea gigas]
TR17303_c1_g2	--	--	--	--	[O]	Posttranslational modification, protein turnover, chaperones	B-box zinc finger	--	Transcription intermediary factor 1-beta [Crassostrea gigas]
TR37809_c0_g1	--	--	--	--	--	--	--	--	predicted protein [Nematostella vectensis]
TR53714_c0_g1	--	--	Molecular Function: ubiquitin-protein transferase activity (GO:0004842);; Molecular Function: Notch binding (GO:0005112);; Cellular Component: cell cortex (GO:0005938);; Biological Process: imaginal disc-derived wing vein morphogenesis (GO:0008586);; Biological Process: imaginal disc-derived wing margin morphogenesis (GO:0008587);; Biological Process: imaginal disc-derived leg joint morphogenesis…	K05633|0.0|cin:100182617|similar to WW domain containing E3 ubiquitin protein ligase 1	[O]	Posttranslational modification, protein turnover, chaperones	HECT-domain (ubiquitin-transferase);; WW domain;; C2 domain	E3 ubiquitin-protein ligase Su(dx) GN=Su(dx) OS=Drosophila melanogaster (Fruit fly) PE=1 SV=1	PREDICTED: NEDD4-like E3 ubiquitin-protein ligase WWP1 isoform X2 [Crassostrea gigas]
TR48677_c1_g1	[D]	Cell cycle control, cell division, chromosome partitioning	Biological Process: protein dephosphorylation (GO:0006470);;	K05866|9e-81|oaa:100075940|CDC25B	[D]	Cell cycle control, cell division, chromosome partitioning	Rhodanese-like domain	M-phase inducer phosphatase GN=stg OS=Drosophila melanogaster (Fruit fly) PE=1 SV=2	PREDICTED: M-phase inducer phosphatase-like isoform X1 [Crassostrea gigas]
TR33042_c0_g1	--	--	--	--	--	--	--	--	PREDICTED: uncharacterized protein LOC105331160 isoform X5 [Crassostrea gigas]
TR13409_c0_g1	[L]	Replication, recombination and repair	--	--	[T]	Signal transduction mechanisms	Endonuclease/Exonuclease/phosphatase family	5&apos;-tyrosyl-DNA phosphodiesterase GN=CBG18823 OS=Caenorhabditis briggsae PE=3 SV=2	hypothetical protein LOTGIDRAFT_205031 [Lottia gigantea]
TR41363_c0_g1	--	--	--	--	--	--	--	--	PREDICTED: protein shisa-4-like [Aplysia californica]
TR11266_c0_g1	--	--	--	K11789|6e-58|isc:IscW_ISCW020004|protein VPRBP, putative	[D]	Cell cycle control, cell division, chromosome partitioning	--	Protein mahjong GN=mahj OS=Drosophila melanogaster (Fruit fly) PE=1 SV=2	PREDICTED: protein VPRBP-like [Crassostrea gigas]
TR24125_c0_g1	--	--	--	--	--	--	--	--	hypothetical protein CGI_10021367 [Crassostrea gigas]
TR18860_c1_g1	--	--	Molecular Function: metal ion binding (GO:0046872);;	--	--	--	Multicopper oxidase	--	PREDICTED: laccase-3-like [Crassostrea gigas]
TR9369_c0_g2	--	--	Molecular Function: zinc ion binding (GO:0008270);; Biological Process: intracellular signal transduction (GO:0035556);;	K13149|1e-65|bfo:BRAFLDRAFT_63748|hypothetical protein	[R]	General function prediction only	PHD-finger	Putative uncharacterized protein DDB_G0271982 GN=DDB_G0271982 OS=Dictyostelium discoideum (Slime mold) PE=4 SV=1	PREDICTED: integrator complex subunit 12-like [Crassostrea gigas]
TR40220_c0_g1	--	--	--	--	--	--	--	--	PREDICTED: uncharacterized protein LOC105335999 [Crassostrea gigas]
TR6335_c0_g1	[IQR]	--	--	--	[R]	General function prediction only	Enoyl-(Acyl carrier protein) reductase;; short chain dehydrogenase;; KR domain	Dehydrogenase/reductase SDR family member 4 {ECO:0000250|UniProtKB:Q9BTZ2} OS=Caenorhabditis elegans PE=1 SV=1	hypothetical protein M514_04676 [Trichuris suis]
TR51075_c0_g2	--	--	--	--	--	--	CCSMST1 family	--	PREDICTED: uncharacterized protein LOC105213453 [Bactrocera cucurbitae]
TR24585_c0_g1	--	--	--	--	--	--	C1q domain	Heavy metal-binding protein HIP OS=Mytilus edulis (Blue mussel) PE=1 SV=1	hypothetical protein LOTGIDRAFT_138166, partial [Lottia gigantea]
TR8381_c0_g1	--	--	--	--	--	--	Domain of unknown function (DUF4559)	--	PREDICTED: uncharacterized protein LOC100377645 [Saccoglossus kowalevskii]
TR25898_c0_g1	--	--	Cellular Component: nucleus (GO:0005634);; Biological Process: gene expression (GO:0010467);; Biological Process: RNA metabolic process (GO:0016070);;	K13211|0.0|tgu:100230574|GCFC1	[K]	Transcription	GC-rich sequence DNA-binding factor-like protein;; Nineteen complex-related protein 2	Transcriptional regulator ATRX homolog GN=xnp-1 OS=Caenorhabditis elegans PE=1 SV=1	PREDICTED: PAX3- and PAX7-binding protein 1-like [Crassostrea gigas]
TR44705_c0_g1	--	--	Molecular Function: G-protein coupled serotonin receptor activity (GO:0004993);; Cellular Component: integral component of plasma membrane (GO:0005887);; Biological Process: serotonin receptor signaling pathway (GO:0007210);;	K04157|9e-11|tgu:100231073|similar to 5-hydroxytryptamine (serotonin) receptor 2A	[R]	General function prediction only	7 transmembrane receptor (rhodopsin family)	Dopamine D2-like receptor GN=D2R OS=Drosophila melanogaster (Fruit fly) PE=2 SV=1	PREDICTED: 5-hydroxytryptamine receptor 2C-like [Crassostrea gigas]
TR40253_c0_g3	--	--	Molecular Function: phosphatidylserine binding (GO:0001786);; Molecular Function: protein binding (GO:0005515);; Biological Process: larval locomotory behavior (GO:0008345);; Cellular Component: membrane (GO:0016020);; Biological Process: neuron remodeling (GO:0016322);; Biological Process: salivary gland cell autophagic cell death (GO:0035071);; Biological Process: cell competition in a multicel…	--	[T]	Signal transduction mechanisms	--	--	Multiple epidermal growth factor-like domains 6 [Crassostrea gigas]
TR18874_c0_g1	--	--	--	K14613|1e-25|bfo:BRAFLDRAFT_208584|hypothetical protein	[R]	General function prediction only	--	--	Solute carrier family 46 member 3 [Crassostrea gigas]
TR9247_c0_g2	--	--	--	--	[T]	Signal transduction mechanisms	C2 domain	Nicotinic receptor-associated protein 1 GN=nra-1 OS=Caenorhabditis elegans PE=3 SV=1	PREDICTED: copine-8-like [Aplysia californica]
TR31016_c0_g1	--	--	--	--	--	--	--	--	Sacsin [Crassostrea gigas]
TR41422_c0_g1	--	--	--	--	--	--	--	--	PREDICTED: uncharacterized protein LOC105328182 [Crassostrea gigas]
TR37460_c0_g1	[I]	Lipid transport and metabolism	Biological Process: metabolic process (GO:0008152);; Molecular Function: transferase activity, transferring phosphorus-containing groups (GO:0016772);;	K00869|1e-118|mdo:100016213|MVK	[I]	Lipid transport and metabolism	GHMP kinases N terminal domain;; GHMP kinases C terminal	Mevalonate kinase GN=mvk OS=Dictyostelium discoideum (Slime mold) PE=1 SV=1	hypothetical protein LOTGIDRAFT_231588 [Lottia gigantea]
TR52940_c0_g1	--	--	--	--	--	--	--	Coiled-coil domain-containing protein 1 (Precursor) OS=Lottia gigantea (Giant owl limpet) PE=1 SV=1	hypothetical protein LOTGIDRAFT_177053, partial [Lottia gigantea]
TR24105_c0_g1	--	--	--	K11866|6e-40|bfo:BRAFLDRAFT_123719|hypothetical protein	[T]	Signal transduction mechanisms	USP8 dimerisation domain	Probable ubiquitin thioesterase DG1039 GN=DG1039 OS=Dictyostelium discoideum (Slime mold) PE=3 SV=1	PREDICTED: STAM-binding protein-like [Crassostrea gigas]
TR14617_c0_g1	--	--	--	--	--	--	--	Galaxin {ECO:0000312|EMBL:ADI50283.1} (Precursor) OS=Acropora millepora (Staghorn coral) PE=1 SV=1	predicted protein [Nematostella vectensis]
TR10303_c0_g1	[R]	General function prediction only	--	--	[BK]	--	Macro domain	--	Poly [ADP-ribose] polymerase 14 [Crassostrea gigas]
TR23109_c0_g1	--	--	Biological Process: fatty acid metabolic process (GO:0006631);; Cellular Component: membrane (GO:0016020);;	--	[I]	Lipid transport and metabolism	GNS1/SUR4 family	Putative fatty acid elongation protein 3 GN=elo-3 OS=Caenorhabditis elegans PE=1 SV=2	PREDICTED: elongation of very long chain fatty acids protein 6-like [Crassostrea gigas]
TR34011_c0_g1	--	--	--	--	--	--	--	Serine protease inhibitor Cvsi-2 {ECO:0000303|PubMed:19464375} (Precursor) OS=Crassostrea virginica (Eastern oyster) PE=1 SV=1	PREDICTED: serine protease inhibitor Cvsi-2-like [Crassostrea gigas]
TR39313_c0_g1	--	--	--	--	--	--	--	Rho GTPase-activating protein gacO GN=gacO OS=Dictyostelium discoideum (Slime mold) PE=3 SV=1	E3 ubiquitin-protein ligase HECW2 [Crassostrea gigas]
TR3605_c0_g1	--	--	--	--	--	--	--	--	PREDICTED: leucine-rich repeat-containing protein 74B-like [Crassostrea gigas]
TR45995_c1_g1	[RTKL]	--	Molecular Function: protein serine/threonine kinase activity (GO:0004674);; Molecular Function: ATP binding (GO:0005524);; Biological Process: protein phosphorylation (GO:0006468);; Biological Process: cell division (GO:0051301);;	K02091|1e-132|mdo:100021675|similar to serine/threonine protein kinase	[R]	General function prediction only	Protein kinase domain;; Protein tyrosine kinase	Cyclin-dependent kinase 1 GN=cdk1 OS=Dictyostelium discoideum (Slime mold) PE=2 SV=1	hypothetical protein LOTGIDRAFT_220339 [Lottia gigantea]
TR28142_c0_g1	--	--	--	--	--	--	--	--	PREDICTED: myosin-14-like [Aplysia californica]
TR3022_c0_g1	[C]	Energy production and conversion	Biological Process: methionine biosynthetic process (GO:0009086);; Molecular Function: hydrolase activity (GO:0016787);;	K09880|3e-64|gga:422600|ENOPH1	[E]	Amino acid transport and metabolism	haloacid dehalogenase-like hydrolase;; Haloacid dehalogenase-like hydrolase	Enolase-phosphatase E1 {ECO:0000255|HAMAP-Rule:MF_03117} GN=BRAFLDRAFT_73099 OS=Branchiostoma floridae (Florida lancelet) PE=3 SV=1	PREDICTED: enolase-phosphatase E1-like [Crassostrea gigas]
TR38826_c0_g1	--	--	--	K10641|2e-89|ssc:100156738|LRSAM1	[R]	General function prediction only	Leucine rich repeat;; Leucine Rich repeats (2 copies)	Leucine-rich repeat protein lrrA GN=lrrA OS=Dictyostelium discoideum (Slime mold) PE=1 SV=1	PREDICTED: E3 ubiquitin-protein ligase LRSAM1-like, partial [Crassostrea gigas]
TR50164_c0_g1	[H]	Coenzyme transport and metabolism	Molecular Function: nicotinate-nucleotide diphosphorylase (carboxylating) activity (GO:0004514);; Biological Process: NAD biosynthetic process (GO:0009435);;	K03462|0.0|nve:NEMVE_v1g135670|hypothetical protein	--	--	Nicotinate phosphoribosyltransferase (NAPRTase) family	--	PREDICTED: nicotinamide phosphoribosyltransferase-like [Crassostrea gigas]
TR6278_c0_g2	--	--	--	--	--	--	--	--	predicted protein [Nematostella vectensis]
TR54967_c0_g1	--	--	--	--	--	--	--	--	hypothetical protein LOTGIDRAFT_209451 [Lottia gigantea]
TR56937_c0_g1	--	--	--	--	--	--	--	Protein transport protein SEC31 GN=sec31 OS=Dictyostelium discoideum (Slime mold) PE=3 SV=1	PREDICTED: vegetative cell wall protein gp1-like [Acyrthosiphon pisum]
TR12753_c0_g1	--	--	--	--	--	--	--	--	Tenascin-X [Crassostrea gigas]
TR50692_c0_g1	--	--	Biological Process: cellular metabolic process (GO:0044237);;	--	--	--	--	--	hypothetical protein CGI_10025981 [Crassostrea gigas]
TR50608_c0_g1	--	--	Cellular Component: integral component of nuclear inner membrane (GO:0005639);; Cellular Component: LINC complex (GO:0034993);;	--	[D]	Cell cycle control, cell division, chromosome partitioning	Sad1 / UNC-like C-terminal	Nuclear migration and anchoring protein unc-84 GN=unc-84 OS=Caenorhabditis elegans PE=1 SV=2	PREDICTED: SUN domain-containing protein 2-like isoform X2 [Crassostrea gigas]
TR25809_c0_g3	--	--	--	--	--	--	--	--	PREDICTED: uncharacterized protein LOC105323242 [Crassostrea gigas]
TR45896_c1_g1	--	--	--	--	--	--	--	--	PREDICTED: protein SZT2-like [Crassostrea gigas]
TR33404_c0_g1	--	--	--	--	--	--	C1q domain	Heavy metal-binding protein HIP OS=Mytilus edulis (Blue mussel) PE=1 SV=1	PREDICTED: complement C1q tumor necrosis factor-related protein 4-like [Crassostrea gigas]
TR34584_c0_g1	--	--	Biological Process: DNA metabolic process (GO:0006259);;	K10740|4e-19|bfo:BRAFLDRAFT_212148|hypothetical protein	--	--	Replication factor A protein 3	--	replication protein A3 [Ostrea edulis]
TR31428_c0_g1	--	--	--	--	[W]	Extracellular structures	Collagen triple helix repeat (20 copies)	Collagen alpha-2(IV) chain (Precursor) OS=Ascaris suum (Pig roundworm) PE=2 SV=1	Collagen-like protein 2, partial [Stegodyphus mimosarum]
TR34442_c1_g1	--	--	Molecular Function: catalytic activity (GO:0003824);; Molecular Function: binding (GO:0005488);; Biological Process: cellular metabolic process (GO:0044237);;	--	[Z]	Cytoskeleton	Bacterial protein of unknown function (DUF948)	Putative leucine-rich repeat-containing protein DDB_G0290503 GN=DDB_G0290503 OS=Dictyostelium discoideum (Slime mold) PE=3 SV=1	GA25631 [Drosophila pseudoobscura pseudoobscura]
TR35269_c8_g4	--	--	--	--	[O]	Posttranslational modification, protein turnover, chaperones	B-box zinc finger	--	PREDICTED: transcription intermediary factor 1-alpha-like [Crassostrea gigas]
TR28952_c1_g1	[S]	Function unknown	--	K10160|5e-19|rno:29260|Tlr4	[T]	Signal transduction mechanisms	TIR domain;; Leucine rich repeat;; TIR domain;; Leucine Rich repeats (2 copies);; MTH538 TIR-like domain (DUF1863);; Leucine rich repeat;; Leucine Rich repeats (2 copies)	Leucine-rich repeat-containing protein let-4 (Precursor) GN=let-4 OS=Caenorhabditis elegans PE=2 SV=2	PREDICTED: toll-like receptor 4 [Crassostrea gigas]
TR30933_c1_g1	--	--	--	--	--	--	--	--	hypothetical protein LOTGIDRAFT_230378 [Lottia gigantea]
TR22542_c0_g1	[IQR]	--	Molecular Function: 3-hydroxyacyl-CoA dehydrogenase activity (GO:0003857);; Molecular Function: estradiol 17-beta-dehydrogenase activity (GO:0004303);; Cellular Component: mitochondrion (GO:0005739);; Cellular Component: lipid droplet (GO:0005811);; Cellular Component: cytosol (GO:0005829);; Cellular Component: microtubule associated complex (GO:0005875);; Biological Process: fatty acid metabolic…	K08683|1e-118|bfo:BRAFLDRAFT_291364|hydroxysteroid 17-beta dehydrogenase 10	[Q]	Secondary metabolites biosynthesis, transport and catabolism	short chain dehydrogenase;; Enoyl-(Acyl carrier protein) reductase;; KR domain	3-hydroxyacyl-CoA dehydrogenase type-2 GN=scu OS=Drosophila melanogaster (Fruit fly) PE=1 SV=1	hydroxysteroid 17-beta dehydrogenase 10 [Branchiostoma floridae]
TR46724_c0_g1	[O]	Posttranslational modification, protein turnover, chaperones	Molecular Function: ATP binding (GO:0005524);; Cellular Component: cytoplasm (GO:0005737);; Cellular Component: microtubule (GO:0005874);; Molecular Function: microtubule binding (GO:0008017);; Biological Process: metabolic process (GO:0008152);; Molecular Function: microtubule-severing ATPase activity (GO:0008568);; Biological Process: microtubule severing (GO:0051013);;	--	[O]	Posttranslational modification, protein turnover, chaperones	ATPase family associated with various cellular activities (AAA)	Katanin p60 ATPase-containing subunit A1 {ECO:0000255|HAMAP-Rule:MF_03023} OS=Strongylocentrotus purpuratus (Purple sea urchin) PE=1 SV=1	Katanin p60 ATPase-containing subunit A-like 2 [Crassostrea gigas]
TR45907_c1_g1	[O]	Posttranslational modification, protein turnover, chaperones	Molecular Function: adenyl-nucleotide exchange factor activity (GO:0000774);; Cellular Component: mitochondrial matrix (GO:0005759);; Biological Process: protein folding (GO:0006457);; Molecular Function: protein homodimerization activity (GO:0042803);; Biological Process: regulation of catalytic activity (GO:0050790);; Molecular Function: chaperone binding (GO:0051087);;	K03687|3e-60|bfo:BRAFLDRAFT_124277|hypothetical protein	[O]	Posttranslational modification, protein turnover, chaperones	GrpE	GrpE protein homolog, mitochondrial (Precursor) GN=Roe1 OS=Drosophila melanogaster (Fruit fly) PE=2 SV=2	PREDICTED: grpE protein homolog 1, mitochondrial-like [Aplysia californica]
TR4473_c0_g1	--	--	--	--	--	--	--	Histidine-rich glycoprotein (Precursor) OS=Plasmodium lophurae PE=4 SV=1	predicted protein [Nematostella vectensis]
TR57307_c1_g3	--	--	--	--	[R]	General function prediction only	Reverse transcriptase (RNA-dependent DNA polymerase)	RNA-directed DNA polymerase from mobile element jockey GN=pol OS=Drosophila melanogaster (Fruit fly) PE=1 SV=1	PREDICTED: RNA-directed DNA polymerase from mobile element jockey-like [Saccoglossus kowalevskii]
TR47735_c0_g1	--	--	--	--	--	--	--	--	PREDICTED: uncharacterized protein LOC105318194 isoform X2 [Crassostrea gigas]
TR1860_c0_g1	--	--	--	--	--	--	--	--	PREDICTED: uncharacterized protein LOC105333553 isoform X1 [Crassostrea gigas]
TR34422_c0_g1	--	--	--	--	--	--	--	--	NF-kappa-B inhibitor-like protein 2 [Crassostrea gigas]
TR6202_c0_g1	--	--	--	--	[T]	Signal transduction mechanisms	Immunoglobulin domain;; Immunoglobulin I-set domain;; Immunoglobulin domain;; Immunoglobulin domain	Down syndrome cell adhesion molecule-like protein Dscam2 (Precursor) GN=Dscam2 OS=Drosophila melanogaster (Fruit fly) PE=2 SV=3	Dscam [Crassostrea gigas]
TR6560_c0_g1	[LDA]	--	--	K12618|1e-133|dre:394008|xrn1, MGC63635, wu:fk92c07, zgc:63635	[LD]	--	--	Probable basic-leucine zipper transcription factor Q GN=bzpQ OS=Dictyostelium discoideum (Slime mold) PE=3 SV=1	PREDICTED: 5&apos;-3&apos; exoribonuclease 1-like [Crassostrea gigas]
TR31736_c2_g1	--	--	--	K01106|2e-18|aag:AaeL_AAEL000840|skeletal muscle/kidney enriched inositol 5-phosphatase	[U]	Intracellular trafficking, secretion, and vesicular transport	--	--	PREDICTED: inositol polyphosphate 5-phosphatase K-like [Crassostrea gigas]
TR7541_c3_g2	--	--	Cellular Component: extracellular region (GO:0005576);;	K03989|3e-85|bfo:BRAFLDRAFT_129974|hypothetical protein	[O]	Posttranslational modification, protein turnover, chaperones	A-macroglobulin complement component;; Alpha-2-macroglobulin family;; Alpha-macro-globulin thiol-ester bond-forming region	--	complement component C3 [Ruditapes decussatus]
TR46856_c0_g1	--	--	--	--	--	--	Macin	Neuromacin-like protein (Precursor) OS=Aplysia californica (California sea hare) PE=3 SV=1	theromacin [Sinanodonta woodiana]
TR27903_c0_g1	--	--	--	--	--	--	--	--	hypothetical protein CGI_10020679 [Crassostrea gigas]
TR29826_c2_g1	--	--	Molecular Function: binding (GO:0005488);; Cellular Component: membrane (GO:0016020);;	K12384|6e-97|bfo:BRAFLDRAFT_126670|hypothetical protein	[T]	Signal transduction mechanisms	CD36 family	Protein croquemort GN=crq OS=Drosophila melanogaster (Fruit fly) PE=1 SV=2	scavenger receptor class B-like protein [Mimachlamys nobilis]
TR54220_c0_g1	--	--	--	K10348|5e-24|bfo:BRAFLDRAFT_260421|hypothetical protein	[R]	General function prediction only	--	--	Peptidylprolyl isomerase-like 5 [Crassostrea gigas]
TR28477_c0_g1	--	--	--	--	--	--	Calponin family repeat	Calponin homolog OV9M OS=Onchocerca volvulus PE=2 SV=2	calponin-like protein [Mytilus galloprovincialis]
TR49802_c0_g1	--	--	--	--	[R]	General function prediction only	Leucine rich repeat;; Leucine Rich repeats (2 copies);; Leucine-rich repeat;; Leucine Rich Repeat	Ras guanine nucleotide exchange factor L GN=gefL OS=Dictyostelium discoideum (Slime mold) PE=2 SV=1	hypothetical protein LOTGIDRAFT_197802 [Lottia gigantea]
TR28980_c0_g2	--	--	--	--	--	--	--	--	PREDICTED: sterile alpha motif domain-containing protein 9-like [Crassostrea gigas]
TR47514_c0_g1	--	--	--	--	--	--	--	--	PREDICTED: uncharacterized protein LOC105326370 isoform X4 [Crassostrea gigas]
TR44641_c0_g1	--	--	Molecular Function: hydrolase activity (GO:0016787);;	--	--	--	Lipase	Phospholipase A1 1 (Precursor; Fragment) OS=Dolichovespula maculata (Bald-faced hornet) PE=1 SV=1	PREDICTED: inactive pancreatic lipase-related protein 1-like [Crassostrea gigas]
TR25841_c0_g1	--	--	Molecular Function: DNA binding (GO:0003677);; Biological Process: regulation of cellular process (GO:0050794);;	K09048|7e-51|bfo:BRAFLDRAFT_126026|hypothetical protein	[K]	Transcription	bZIP transcription factor;; Basic region leucine zipper;; bZIP Maf transcription factor	Cyclic AMP response element-binding protein A GN=CrebA OS=Drosophila melanogaster (Fruit fly) PE=1 SV=2	PREDICTED: cyclic AMP-responsive element-binding protein 3-like protein 3-B isoform X2 [Crassostrea gigas]
TR38773_c4_g2	--	--	--	--	--	--	--	--	GF22824 [Drosophila ananassae]
TR36666_c0_g1	--	--	--	--	--	--	--	--	PREDICTED: uncharacterized protein LOC105343207 isoform X4 [Crassostrea gigas]
TR50643_c0_g1	--	--	--	--	--	--	Domain of unknown function (DUF4371)	--	PREDICTED: zinc finger protein 862-like [Saccoglossus kowalevskii]
TR15170_c0_g1	--	--	--	--	--	--	--	--	hypothetical protein LOTGIDRAFT_237300 [Lottia gigantea]
TR3889_c0_g1	--	--	--	--	[R]	General function prediction only	Sortilin, neurotensin receptor 3,	--	PREDICTED: sortilin-related receptor-like isoform X2 [Crassostrea gigas]
TR1554_c0_g1	--	--	--	--	--	--	--	--	PREDICTED: uncharacterized protein LOC105332190 isoform X2 [Crassostrea gigas]
TR10523_c0_g2	--	--	--	--	--	--	--	G8 domain-containing protein DDB_G0286311 (Precursor) GN=DDB_G0286311 OS=Dictyostelium discoideum (Slime mold) PE=3 SV=1	hypothetical protein Y032_0008g317 [Ancylostoma ceylanicum]
TR22955_c0_g1	--	--	Molecular Function: catalytic activity (GO:0003824);; Biological Process: cellular process (GO:0009987);;	--	--	--	--	--	Putative serine/threonine-protein kinase pats1 [Crassostrea gigas]
TR7035_c0_g1	--	--	--	--	--	--	--	--	hypothetical protein CGI_10028433 [Crassostrea gigas]
TR26346_c0_g2	--	--	Biological Process: phosphorylation (GO:0016310);; Molecular Function: transferase activity (GO:0016740);;	--	[T]	Signal transduction mechanisms	Cyclic nucleotide-binding domain	cAMP-dependent protein kinase regulatory subunit GN=kin-2 OS=Caenorhabditis elegans PE=1 SV=3	PREDICTED: uncharacterized protein LOC105317232 isoform X2 [Crassostrea gigas]
TR51780_c2_g1	--	--	--	--	--	--	--	--	PREDICTED: uncharacterized protein LOC105339548 [Crassostrea gigas]
TR2813_c0_g1	--	--	--	--	[K]	Transcription	SAM domain (Sterile alpha motif);; Sterile alpha motif (SAM)/Pointed domain	Polycomb protein Scm OS=Drosophila melanogaster (Fruit fly) PE=1 SV=2	hypothetical protein LOTGIDRAFT_107440, partial [Lottia gigantea]
TR48088_c0_g1	--	--	--	--	--	--	FAST kinase-like protein, subdomain 1	--	hypothetical protein HELRODRAFT_193319 [Helobdella robusta]
TR17192_c0_g1	[S]	Function unknown	--	--	[R]	General function prediction only	YhhN family	--	PREDICTED: lysoplasmalogenase-like protein TMEM86A [Crassostrea gigas]
TR48491_c0_g1	--	--	--	--	[U]	Intracellular trafficking, secretion, and vesicular transport	BAR domain;; Vps5 C terminal like	--	hypothetical protein LOTGIDRAFT_192130 [Lottia gigantea]
TR15586_c0_g1	[R]	General function prediction only	--	--	[R]	General function prediction only	Zinc finger, C2H2 type;; Zinc-finger double domain;; C2H2-type zinc finger;; C2H2-type zinc finger;; Zinc-finger double-stranded RNA-binding;; BED zinc finger	Adult enhancer factor 1 GN=Aef1 OS=Drosophila melanogaster (Fruit fly) PE=2 SV=1	zinc finger, C2H2 type [Dictyocaulus viviparus]
TR40387_c0_g1	--	--	--	K08881|2e-12|dre:442869|trim24, tif1a, tifa, wu:fi24g04	[O]	Posttranslational modification, protein turnover, chaperones	Domain of unknown function (DUF1897);; B-box zinc finger	Uncharacterized protein DDB_G0279899 GN=DDB_G0279899 OS=Dictyostelium discoideum (Slime mold) PE=3 SV=2	PREDICTED: uncharacterized protein LOC105319377 isoform X1 [Crassostrea gigas]
TR30949_c0_g1	[Z]	Cytoskeleton	Molecular Function: GTPase activity (GO:0003924);; Molecular Function: structural constituent of cytoskeleton (GO:0005200);; Molecular Function: GTP binding (GO:0005525);; Cellular Component: cytoplasm (GO:0005737);; Cellular Component: microtubule (GO:0005874);; Biological Process: microtubule-based process (GO:0007017);; Biological Process: metabolic process (GO:0008152);; Biological Process: p…	--	[Z]	Cytoskeleton	--	Tubulin alpha-1 chain OS=Paracentrotus lividus (Common sea urchin) PE=2 SV=1	hypothetical protein LOTGIDRAFT_176871 [Lottia gigantea]
TR23227_c0_g1	--	--	Molecular Function: catalytic activity (GO:0003824);;	--	[S]	Function unknown	Predicted AdoMet-dependent methyltransferase	Probable tRNA (uracil-O(2)-)-methyltransferase GN=trmt44 OS=Drosophila melanogaster (Fruit fly) PE=2 SV=2	hypothetical protein LOTGIDRAFT_115011, partial [Lottia gigantea]
TR35656_c0_g1	--	--	--	K08760|2e-06|xla:399000|hypothetical protein MGC68602	--	--	--	Uncharacterized protein PF11_0207 GN=PF11_0207 OS=Plasmodium falciparum (isolate 3D7) PE=4 SV=2	hypothetical protein D910_03446 [Dendroctonus ponderosae]
TR5206_c0_g1	--	--	--	K14296|3e-70|bfo:BRAFLDRAFT_83641|hypothetical protein	[YU]	--	Zn-finger in Ran binding protein and others;; Nucleoporin Nup153-like	Nuclear pore complex protein Nup153 GN=Nup153 OS=Drosophila melanogaster (Fruit fly) PE=1 SV=4	PREDICTED: nuclear pore complex protein Nup153-like isoform X2 [Aplysia californica]
TR15418_c0_g1	[C]	Energy production and conversion	Molecular Function: oxidoreductase activity (GO:0016491);;	--	--	--	FAD binding domain	FAD-linked oxidoreductase DDB_G0289697 GN=DDB_G0289697 OS=Dictyostelium discoideum (Slime mold) PE=2 SV=1	PREDICTED: cannabidiolic acid synthase-like 1-like [Aplysia californica]
TR22285_c2_g1	[R]	General function prediction only	Molecular Function: binding (GO:0005488);;	--	[R]	General function prediction only	Zinc-finger double domain;; Zinc finger, C2H2 type;; C2H2-type zinc finger;; BED zinc finger;; Zinc-finger of C2H2 type	Protein glass GN=gl OS=Drosophila virilis (Fruit fly) PE=3 SV=1	hypothetical protein L798_11019 [Zootermopsis nevadensis]
TR16232_c0_g1	[RTKL]	--	Molecular Function: protein serine/threonine kinase activity (GO:0004674);; Molecular Function: ATP binding (GO:0005524);; Biological Process: protein phosphorylation (GO:0006468);; Biological Process: actin filament organization (GO:0007015);;	K04409|0.0|ame:724453|Pak	[T]	Signal transduction mechanisms	Protein kinase domain;; Protein tyrosine kinase;; P21-Rho-binding domain	Serine/threonine-protein kinase pak-1 GN=pak-1 OS=Caenorhabditis elegans PE=1 SV=2	PREDICTED: serine/threonine-protein kinase PAK 3-like isoform X1 [Crassostrea gigas]
TR30178_c1_g1	--	--	--	--	--	--	--	--	Tripartite motif-containing protein 45 [Crassostrea gigas]
TR43882_c0_g2	--	--	--	--	--	--	Immunoglobulin domain;; Immunoglobulin domain;; Immunoglobulin I-set domain	--	PREDICTED: sialoadhesin-like [Amphimedon queenslandica]
TR20517_c0_g1	--	--	--	--	--	--	NACHT domain	--	hypothetical protein CAPTEDRAFT_213051 [Capitella teleta]
TR7874_c0_g1	--	--	--	--	[R]	General function prediction only	Vacuolar protein sorting-associated protein 26;; Arrestin (or S-antigen), N-terminal domain	Down syndrome critical region protein 3 homolog GN=DDB_G0292212 OS=Dictyostelium discoideum (Slime mold) PE=3 SV=1	PREDICTED: Down syndrome critical region protein 3 homolog [Aplysia californica]
TR28170_c0_g1	[R]	General function prediction only	Molecular Function: chromatin binding (GO:0003682);; Cellular Component: nucleus (GO:0005634);; Biological Process: regulation of transcription, DNA-templated (GO:0006355);; Biological Process: chromatin organization (GO:0016568);;	K11293|1e-124|bfo:BRAFLDRAFT_221740|hypothetical protein	[DK]	--	WD domain, G-beta repeat;; Anaphase-promoting complex subunit 4 WD40 domain	Protein HIRA homolog GN=Hira OS=Drosophila melanogaster (Fruit fly) PE=1 SV=2	hypothetical protein LOTGIDRAFT_206663 [Lottia gigantea]
TR44521_c0_g1	[R]	General function prediction only	--	--	[R]	General function prediction only	Zinc finger, C2H2 type;; C2H2-type zinc finger;; C2H2-type zinc-finger domain	Protein snail GN=sna OS=Drosophila melanogaster (Fruit fly) PE=1 SV=2	PREDICTED: zinc finger protein Xfin isoform X2 [Musca domestica]
TR13399_c0_g1	--	--	--	--	--	--	--	Splicing factor 3B subunit 4 GN=sap-49 OS=Caenorhabditis elegans PE=1 SV=2	hypothetical protein CGI_10011141 [Crassostrea gigas]
TR16930_c0_g1	[LKJ]	--	Molecular Function: organic cyclic compound binding (GO:0097159);; Molecular Function: heterocyclic compound binding (GO:1901363);;	--	[A]	RNA processing and modification	DEAD/DEAH box helicase;; Helicase conserved C-terminal domain;; GUCT (NUC152) domain;; Type III restriction enzyme, res subunit	Probable ATP-dependent RNA helicase ddx17 GN=ddx17 OS=Dictyostelium discoideum (Slime mold) PE=3 SV=1	hypothetical protein LOTGIDRAFT_221850 [Lottia gigantea]
TR17535_c1_g1	--	--	Molecular Function: ATP binding (GO:0005524);; Molecular Function: zinc ion binding (GO:0008270);;	--	--	--	--	--	hypothetical protein CGI_10022372 [Crassostrea gigas]
TR23681_c0_g1	[GEPR]	--	Molecular Function: peptidase activity (GO:0008233);; Cellular Component: membrane (GO:0016020);; Molecular Function: transmembrane transporter activity (GO:0022857);; Biological Process: transport (GO:0044765);;	--	[G]	Carbohydrate transport and metabolism	Sugar (and other) transporter;; Major Facilitator Superfamily;; Sugar-tranasporters, 12 TM	Glucose transporter type 1 (Precursor) GN=Glut1 OS=Drosophila melanogaster (Fruit fly) PE=2 SV=4	hypothetical protein LOTGIDRAFT_180320 [Lottia gigantea]
TR1725_c0_g1	--	--	--	--	--	--	hAT family C-terminal dimerisation region	Transposable element Hobo transposase GN=T OS=Drosophila melanogaster (Fruit fly) PE=3 SV=1	PREDICTED: zinc finger BED domain-containing protein 1-like [Crassostrea gigas]
TR48720_c10_g1	--	--	--	--	--	--	--	--	PREDICTED: uncharacterized protein LOC100635076 [Amphimedon queenslandica]
TR50884_c0_g1	--	--	--	--	--	--	--	--	Cell wall-associated hydrolase [Trichuris trichiura]
TR7251_c0_g1	--	--	--	K08375|1e-08|aml:100477366|NPFFR2	[R]	General function prediction only	7 transmembrane receptor (rhodopsin family)	--	PREDICTED: uncharacterized protein LOC101846090 [Aplysia californica]
TR17260_c2_g2	--	--	--	--	--	--	UPF0693 family	--	PREDICTED: UPF0693 protein C10orf32 homolog isoform X1 [Aplysia californica]
TR2873_c0_g1	--	--	--	--	--	--	--	--	PREDICTED: uncharacterized protein LOC105345533 [Crassostrea gigas]
TR16372_c0_g1	--	--	--	--	[T]	Signal transduction mechanisms	PH domain	PH domain-containing protein DDB_G0274775 GN=DDB_G0274775 OS=Dictyostelium discoideum (Slime mold) PE=3 SV=1	hypothetical protein LOTGIDRAFT_235216 [Lottia gigantea]
TR22002_c0_g1	[O]	Posttranslational modification, protein turnover, chaperones	Molecular Function: hydrolase activity (GO:0016787);;	K01360|1e-17|dre:100004460|pcsk2	[O]	Posttranslational modification, protein turnover, chaperones	Subtilase family	Furin-like protease 2 (Precursor) GN=Fur2 OS=Drosophila melanogaster (Fruit fly) PE=2 SV=2	furin-1 [Clonorchis sinensis]
TR48672_c0_g1	[R]	General function prediction only	Molecular Function: organic cyclic compound binding (GO:0097159);; Molecular Function: heterocyclic compound binding (GO:1901363);;	--	[DT]	--	50S ribosome-binding GTPase;; Ferrous iron transport protein B;; Dynamin family	Uncharacterized GTP-binding protein E02H1.2 GN=E02H1.2 OS=Caenorhabditis elegans PE=3 SV=1	hypothetical protein HELRODRAFT_95909 [Helobdella robusta]
TR52531_c1_g1	--	--	--	--	--	--	Opioid growth factor receptor (OGFr) conserved region	--	PREDICTED: opioid growth factor receptor-like protein 1 [Crassostrea gigas]
TR40998_c1_g1	--	--	--	--	[R]	General function prediction only	--	Uncharacterized protein DDB_G0283357 GN=DDB_G0283357 OS=Dictyostelium discoideum (Slime mold) PE=4 SV=1	hypothetical protein LOTGIDRAFT_120571, partial [Lottia gigantea]
TR16714_c0_g1	--	--	--	K13443|1e-31|bta:280815|NPC2, HE1	[S]	Function unknown	ML domain	Ecdysteroid-regulated 16 kDa protein (Precursor) GN=ESR16 OS=Manduca sexta (Tobacco hawkmoth) PE=2 SV=1	PREDICTED: epididymal secretory protein E1-like [Crassostrea gigas]
TR35555_c0_g1	--	--	--	--	--	--	TIR domain	--	Toll-like receptor 2 [Crassostrea gigas]
TR53709_c0_g2	--	--	--	--	[T]	Signal transduction mechanisms	Immunoglobulin I-set domain;; Immunoglobulin domain;; Immunoglobulin domain;; Immunoglobulin domain	Fibroblast growth factor receptor (Precursor) GN=FGFR OS=Strongylocentrotus purpuratus (Purple sea urchin) PE=2 SV=1	Leucine-rich repeat and immunoglobulin-like domain-containing nogo receptor-interacting protein 2 [Crassostrea gigas]
TR2488_c0_g1	--	--	--	--	--	--	--	Ctenidin-1 {ECO:0000303|PubMed:20369272} (Precursor) OS=Cupiennius salei (American wandering spider) PE=1 SV=1	PREDICTED: uncharacterized protein LOC105342521 [Crassostrea gigas]
TR11893_c0_g1	--	--	--	--	--	--	--	--	PREDICTED: uncharacterized protein LOC101846520 [Aplysia californica]
TR52374_c0_g1	[R]	General function prediction only	--	K07071|8e-90|tca:655345|similar to CG8768-PA	[F]	Nucleotide transport and metabolism	Domain of unknown function (DUF1731);; NAD dependent epimerase/dehydratase family	--	PREDICTED: epimerase family protein SDR39U1-like [Aplysia californica]
TR28065_c0_g1	--	--	--	--	--	--	--	--	PREDICTED: putative uncharacterized protein CXorf58 isoform X2 [Crassostrea gigas]
TR23253_c6_g1	--	--	--	--	--	--	--	--	PREDICTED: uncharacterized protein LOC105323849 [Crassostrea gigas]
TR41191_c0_g1	--	--	--	--	--	--	--	--	predicted protein [Nematostella vectensis]
TR21794_c1_g1	--	--	--	--	--	--	--	Calponin homology domain-containing protein DDB_G0272472 GN=DDB_G0272472 OS=Dictyostelium discoideum (Slime mold) PE=3 SV=1	PREDICTED: coiled-coil domain-containing protein 151-like [Crassostrea gigas]
TR27849_c0_g1	--	--	--	K14443|8e-45|nvi:100122135|NV11964	[TR]	--	BTG family	BTG family protein GN=btg OS=Dictyostelium discoideum (Slime mold) PE=3 SV=1	PREDICTED: maternal B9.10 protein-like [Crassostrea gigas]
TR11459_c0_g2	--	--	--	--	[ZR]	--	--	Putative leucine-rich repeat-containing protein DDB_G0290503 GN=DDB_G0290503 OS=Dictyostelium discoideum (Slime mold) PE=3 SV=1	hypothetical protein [Trypanosoma cruzi strain CL Brener]
TR14405_c1_g1	--	--	--	--	--	--	Inhibitor of Apoptosis domain	--	putative methyltransferase [Schistosoma mansoni]
TR34724_c0_g3	--	--	Molecular Function: signal transducer activity (GO:0004871);; Biological Process: signal transduction (GO:0007165);;	K04255|2e-13|spu:579346|similar to opsin	[R]	General function prediction only	7 transmembrane receptor (rhodopsin family)	Rhodopsin GN=RHO OS=Sepia officinalis (Common cuttlefish) PE=2 SV=1	PREDICTED: melanopsin-B-like [Crassostrea gigas]
TR5034_c4_g3	[Q]	Secondary metabolites biosynthesis, transport and catabolism	--	--	[R]	General function prediction only	Thioesterase superfamily	Putative esterase F42H10.6 GN=F42H10.6 OS=Caenorhabditis elegans PE=1 SV=2	PREDICTED: acyl-coenzyme A thioesterase 13-like [Crassostrea gigas]
TR8909_c0_g1	--	--	--	--	--	--	--	--	hypothetical protein BRAFLDRAFT_106560 [Branchiostoma floridae]
TR44784_c0_g1	--	--	--	--	--	--	Scavenger receptor cysteine-rich domain	Scavenger receptor cysteine-rich domain superfamily protein {ECO:0000312|EMBL:BAK39578.1} (Precursor) OS=Patiria pectinifera (Starfish) PE=1 SV=1	Deleted in malignant brain tumors 1 protein [Crassostrea gigas]
TR45841_c0_g1	--	--	--	K13138|0.0|dre:562131|ints1, fa14a05, wu:fa14a05, wu:fa55a06	[S]	Function unknown	Protein of unknown function (DUF3677)	Integrator complex subunit 1 homolog GN=ints1 OS=Dictyostelium discoideum (Slime mold) PE=3 SV=1	PREDICTED: integrator complex subunit 1-like [Crassostrea gigas]
TR16058_c0_g1	[TZDR]	--	Molecular Function: transferase activity, transferring acyl groups (GO:0016746);; Molecular Function: metal ion binding (GO:0046872);;	K02183|5e-51|bfo:BRAFLDRAFT_59748|hypothetical protein	[T]	Signal transduction mechanisms	EF hand;; EF-hand domain pair;; EF-hand domain;; EF-hand domain pair;; EF-hand domain;; EF hand	Calmodulin GN=CAM OS=Paramecium tetraurelia PE=1 SV=3	calmodulin [Hyriopsis cumingii]
TR28499_c0_g1	--	--	Molecular Function: transferase activity (GO:0016740);;	--	[I]	Lipid transport and metabolism	Acyltransferase;; Acyltransferase C-terminus	Putative 1-acyl-sn-glycerol-3-phosphate acyltransferase acl-12 GN=acl-12 OS=Caenorhabditis elegans PE=3 SV=1	PREDICTED: 1-acyl-sn-glycerol-3-phosphate acyltransferase epsilon-like [Crassostrea gigas]
TR32786_c3_g7	--	--	Molecular Function: zinc ion binding (GO:0008270);;	--	[D]	Cell cycle control, cell division, chromosome partitioning	Histidine kinase-, DNA gyrase B-, and HSP90-like ATPase;; CW-type Zinc Finger	Histone-lysine N-methyltransferase, H3 lysine-79 specific {ECO:0000303|PubMed:21187070} OS=Dictyostelium discoideum (Slime mold) PE=2 SV=2	MORC family CW-type zinc finger protein 2 [Crassostrea gigas]
TR9078_c0_g1	--	--	Cellular Component: plasma membrane (GO:0005886);; Biological Process: mechanosensory behavior (GO:0007638);; Molecular Function: mechanically-gated ion channel activity (GO:0008381);; Cellular Component: integral component of membrane (GO:0016021);; Biological Process: ion transmembrane transport (GO:0034220);; Biological Process: cellular response to mechanical stimulus (GO:0071260);;	--	[S]	Function unknown	Piezo non-specific cation channel, R-Ras-binding domain	Piezo-type mechanosensitive ion channel component {ECO:0000305} OS=Drosophila melanogaster (Fruit fly) PE=2 SV=1	Protein FAM38B [Crassostrea gigas]
TR46014_c1_g1	--	--	Biological Process: organic substance metabolic process (GO:0071704);;	--	--	--	--	Uncharacterized transmembrane protein DDB_G0289901 (Precursor) GN=DDB_G0289901 OS=Dictyostelium discoideum (Slime mold) PE=3 SV=1	hypothetical protein LOTGIDRAFT_236582 [Lottia gigantea]
TR33730_c0_g1	[R]	General function prediction only	--	--	[T]	Signal transduction mechanisms	Ankyrin repeats (many copies);; Ankyrin repeats (many copies);; Ankyrin repeats (3 copies);; Ankyrin repeat;; Ankyrin repeat	Tankyrase OS=Drosophila melanogaster (Fruit fly) PE=1 SV=1	PREDICTED: oxysterol-binding protein-related protein 1-like [Crassostrea gigas]
TR33602_c0_g1	[R]	General function prediction only	Molecular Function: transferase activity (GO:0016740);;	--	--	--	--	--	hypothetical protein CAPTEDRAFT_126787, partial [Capitella teleta]
TR14359_c0_g1	[R]	General function prediction only	--	--	[R]	General function prediction only	Ankyrin repeats (3 copies);; Ankyrin repeats (many copies);; Ankyrin repeat;; Ankyrin repeat;; Ankyrin repeats (many copies)	Ankyrin repeat, PH and SEC7 domain containing protein secG GN=secG OS=Dictyostelium discoideum (Slime mold) PE=2 SV=1	PREDICTED: serine/threonine-protein phosphatase 6 regulatory ankyrin repeat subunit B-like isoform X5 [Crassostrea gigas]
TR34412_c0_g1	--	--	--	--	--	--	--	--	hypothetical protein CGI_10002666 [Crassostrea gigas]
TR30754_c0_g1	--	--	--	--	--	--	--	DNA ligase 1 GN=lig1 OS=Dictyostelium discoideum (Slime mold) PE=3 SV=1	Protein C33G8.2 [Caenorhabditis elegans]
TR49985_c0_g1	--	--	Molecular Function: catalytic activity (GO:0003824);;	--	--	--	Galactose-3-O-sulfotransferase	--	PREDICTED: galactose-3-O-sulfotransferase 2-like [Crassostrea gigas]
TR6063_c0_g1	--	--	--	--	--	--	Leucine Rich repeats (2 copies);; Leucine rich repeat N-terminal domain	--	--
TR53777_c0_g1	--	--	--	--	--	--	Mitochondria-eating protein	Uncharacterized protein PFB0145c GN=PFB0145c OS=Plasmodium falciparum (isolate 3D7) PE=2 SV=1	PREDICTED: golgin subfamily A member 6A-like isoform X1 [Crassostrea gigas]
TR6712_c0_g1	--	--	--	--	--	--	C1q domain	Heavy metal-binding protein HIP OS=Mytilus edulis (Blue mussel) PE=1 SV=1	putative C1q domain containing protein MgC1q62 [Mytilus galloprovincialis]
TR30119_c0_g4	--	--	--	--	--	--	--	Uncharacterized proline-rich protein (Fragment) OS=Owenia fusiformis PE=4 SV=1	PREDICTED: homeobox protein ESX1-like, partial [Vollenhovia emeryi]
TR52633_c0_g2	[P]	Inorganic ion transport and metabolism	--	--	[O]	Posttranslational modification, protein turnover, chaperones	--	Uncharacterized histidine-rich protein DDB_G0274557 (Precursor) GN=DDB_G0274557 OS=Dictyostelium discoideum (Slime mold) PE=3 SV=1	hypothetical protein EAI_03683 [Harpegnathos saltator]
TR9377_c0_g1	--	--	--	--	[K]	Transcription	OST-HTH/LOTUS domain;; Tudor domain	--	PREDICTED: tudor domain-containing protein 5-like [Crassostrea gigas]
TR46413_c0_g1	--	--	--	--	--	--	--	--	hypothetical protein CGI_10002163 [Crassostrea gigas]
TR34328_c0_g1	[F]	Nucleotide transport and metabolism	Molecular Function: thymidylate synthase activity (GO:0004799);; Biological Process: dTMP biosynthetic process (GO:0006231);; Biological Process: methylation (GO:0032259);;	K00560|1e-171|bfo:BRAFLDRAFT_77468|hypothetical protein	[F]	Nucleotide transport and metabolism	Thymidylate synthase	Thymidylate synthase GN=Ts OS=Drosophila melanogaster (Fruit fly) PE=1 SV=2	Thymidylate synthase [Crassostrea gigas]
TR51729_c0_g2	[E]	Amino acid transport and metabolism	Molecular Function: carboxypeptidase activity (GO:0004180);;	K07752|1e-74|nve:NEMVE_v1g50259|hypothetical protein	[R]	General function prediction only	Zinc carboxypeptidase	Carboxypeptidase D (Precursor) GN=svr OS=Drosophila melanogaster (Fruit fly) PE=1 SV=2	PREDICTED: carboxypeptidase D-like [Crassostrea gigas]
TR25439_c0_g1	--	--	--	--	[K]	Transcription	Mediator complex subunit 13 N-terminal	Mediator of RNA polymerase II transcription subunit 13 GN=skd OS=Drosophila melanogaster (Fruit fly) PE=1 SV=1	hypothetical protein LOTGIDRAFT_153005 [Lottia gigantea]
TR39079_c0_g2	[K]	Transcription	Molecular Function: transcription factor activity, sequence-specific DNA binding (GO:0003700);; Biological Process: regulation of transcription, DNA-templated (GO:0006355);; Molecular Function: sequence-specific DNA binding (GO:0043565);;	K09406|6e-30|ptr:451750|FOXM1	[K]	Transcription	Forkhead domain;; RAD9, RAD1, HUS1-interacting nuclear orphan protein	Forkhead box protein G1 {ECO:0000250|UniProtKB:P55316} OS=Mnemiopsis leidyi (Sea walnut) PE=2 SV=1	PREDICTED: forkhead box protein M1-like [Crassostrea gigas]
TR40257_c1_g1	--	--	--	--	--	--	Sushi repeat (SCR repeat)	--	--
TR49584_c0_g1	--	--	Biological Process: metabolic process (GO:0008152);; Molecular Function: cysteine-type peptidase activity (GO:0008234);;	K01275|1e-171|spu:761822|similar to cathepsin C	[O]	Posttranslational modification, protein turnover, chaperones	Papain family cysteine protease;; Cathepsin C exclusion domain;; Peptidase family C1 propeptide	Cathepsin C (Precursor) OS=Schistosoma mansoni (Blood fluke) PE=2 SV=1	hypothetical protein LOTGIDRAFT_221343 [Lottia gigantea]
TR25507_c50_g31	[R]	General function prediction only	Molecular Function: GTPase activity (GO:0003924);; Molecular Function: GTP binding (GO:0005525);; Cellular Component: Golgi stack (GO:0005795);; Biological Process: protein ADP-ribosylation (GO:0006471);; Biological Process: intracellular protein transport (GO:0006886);; Biological Process: post-Golgi vesicle-mediated transport (GO:0006892);; Biological Process: cell adhesion (GO:0007155);; Biolo…	K07977|7e-57|nve:NEMVE_v1g242285|hypothetical protein	[U]	Intracellular trafficking, secretion, and vesicular transport	ADP-ribosylation factor family	ADP-ribosylation factor 1 GN=ARF1 OS=Locusta migratoria (Migratory locust) PE=2 SV=2	predicted protein [Nematostella vectensis]
TR34151_c0_g1	--	--	--	--	--	--	--	--	PREDICTED: uncharacterized protein LOC100370662 [Saccoglossus kowalevskii]
TR40729_c0_g1	--	--	--	--	--	--	Winged helix-turn helix;; Homeodomain-like domain;; Helix-turn-helix domain	--	PREDICTED: uncharacterized protein LOC101849520 [Aplysia californica]
TR9341_c2_g5	--	--	--	K08883|2e-06|bta:533296|TRIM33	[O]	Posttranslational modification, protein turnover, chaperones	SMP-30/Gluconolaconase/LRE-like region	--	hypothetical protein LOTGIDRAFT_173947 [Lottia gigantea]
TR25504_c0_g2	--	--	--	--	[R]	General function prediction only	Immunoglobulin domain;; Immunoglobulin I-set domain;; Immunoglobulin domain;; Immunoglobulin domain	Lachesin (Precursor) GN=Lac OS=Drosophila melanogaster (Fruit fly) PE=1 SV=2	hypothetical protein CAPTEDRAFT_197591 [Capitella teleta]
TR2116_c0_g1	--	--	--	--	--	--	Zinc finger, C3HC4 type (RING finger)	--	hypothetical protein LOTGIDRAFT_161808 [Lottia gigantea]
TR32006_c0_g1	--	--	--	--	--	--	--	--	PREDICTED: uncharacterized protein LOC105323944, partial [Crassostrea gigas]
TR30191_c0_g2	--	--	--	--	--	--	ENTH domain;; ANTH domain	--	PREDICTED: AP-4 complex accessory subunit tepsin-like isoform X1 [Crassostrea gigas]
TR46266_c0_g1	[R]	General function prediction only	--	K11847|2e-07|bfo:BRAFLDRAFT_224157|hypothetical protein	[B]	Chromatin structure and dynamics	MYND finger	SET domain-containing protein 14 GN=set-14 OS=Caenorhabditis elegans PE=3 SV=2	hypothetical protein DAPPUDRAFT_103160 [Daphnia pulex]
TR19556_c0_g1	[RTKL]	--	Molecular Function: transmembrane receptor protein tyrosine kinase activity (GO:0004714);; Molecular Function: ATP binding (GO:0005524);; Biological Process: transmembrane receptor protein tyrosine kinase signaling pathway (GO:0007169);; Cellular Component: membrane (GO:0016020);; Biological Process: peptidyl-tyrosine phosphorylation (GO:0018108);;	K05125|1e-106|phu:Phum_PHUM542980|Discoidin domain-containing receptor 2 precursor, putative (EC:2.7.10.1)	[T]	Signal transduction mechanisms	Protein tyrosine kinase;; Protein kinase domain	Tyrosine-protein kinase transmembrane receptor Ror (Precursor) GN=Ror OS=Drosophila melanogaster (Fruit fly) PE=1 SV=1	PREDICTED: discoidin domain-containing receptor 2-like isoform X2 [Crassostrea gigas]
TR13116_c0_g1	--	--	--	--	--	--	MAM domain, meprin/A5/mu	Probable serine/threonine-protein kinase clkA GN=clkA OS=Dictyostelium discoideum (Slime mold) PE=3 SV=1	GI14785 [Drosophila mojavensis]
TR15092_c0_g2	--	--	Molecular Function: zinc ion binding (GO:0008270);;	K10127|2e-38|aml:100466328|MDM4	--	--	Zinc finger, C3HC4 type (RING finger)	Papilin (Precursor) GN=Ppn OS=Drosophila melanogaster (Fruit fly) PE=1 SV=2	hypothetical protein LOTGIDRAFT_232765 [Lottia gigantea]
TR57450_c1_g2	--	--	Molecular Function: binding (GO:0005488);;	--	--	--	DDE superfamily endonuclease	Transposable element Tcb2 transposase OS=Caenorhabditis briggsae PE=3 SV=1	Transposable element Tcb2 transposase, partial [Stegodyphus mimosarum]
TR52205_c0_g1	--	--	--	--	--	--	--	Serine, glycine, tyrosine and glutamine-rich protein (Precursor) OS=Pinctada margaritifera (Black-lipped pearl oyster) PE=1 SV=1	PREDICTED: uncharacterized protein LOC105342521 [Crassostrea gigas]
TR57520_c0_g1	--	--	--	--	[S]	Function unknown	--	--	PREDICTED: uncharacterized protein KIAA1109-like isoform X1 [Crassostrea gigas]
TR5191_c0_g2	--	--	--	--	--	--	--	--	hypothetical protein CGI_10006275 [Crassostrea gigas]
TR42228_c0_g1	--	--	--	--	--	--	--	Galaxin {ECO:0000312|EMBL:ADI50283.1} (Precursor) OS=Acropora millepora (Staghorn coral) PE=1 SV=1	predicted protein [Nematostella vectensis]
TR44549_c0_g1	--	--	--	--	--	--	--	--	PREDICTED: uncharacterized protein LOC105329543 [Crassostrea gigas]
TR6485_c0_g1	--	--	Molecular Function: metal ion binding (GO:0046872);;	--	--	--	--	--	PREDICTED: uncharacterized protein LOC105324966 isoform X2 [Crassostrea gigas]
TR21524_c0_g1	[A]	RNA processing and modification	Biological Process: metabolic process (GO:0008152);; Molecular Function: zinc ion binding (GO:0008270);; Molecular Function: ligase activity (GO:0016874);;	K10661|1e-100|aml:100481837|MARCH6	[A]	RNA processing and modification	RING-variant domain	--	PREDICTED: E3 ubiquitin-protein ligase MARCH6-like isoform X2 [Crassostrea gigas]
TR14850_c0_g1	--	--	Cellular Component: extracellular region (GO:0005576);; Biological Process: acute-phase response (GO:0006953);;	--	--	--	--	--	PREDICTED: serum amyloid A-5 protein [Strongylocentrotus purpuratus]
TR48415_c0_g1	--	--	--	--	--	--	DDE superfamily endonuclease;; Plant transposon protein	--	PREDICTED: putative nuclease HARBI1 [Crassostrea gigas]
TR48593_c0_g1	[Q]	Secondary metabolites biosynthesis, transport and catabolism	Molecular Function: binding (GO:0005488);; Biological Process: transport (GO:0006810);; Biological Process: biological_process (GO:0044699);;	K14735|5e-19|cfa:491926|HEPH	[Q]	Secondary metabolites biosynthesis, transport and catabolism	Multicopper oxidase	Hephaestin-like protein {ECO:0000303|PubMed:23765379} (Precursor) OS=Acropora millepora (Staghorn coral) PE=1 SV=1	RecName: Full=Hephaestin-like protein; Flags: Precursor [Acropora millepora]
TR8605_c0_g1	--	--	--	--	--	--	--	--	hypothetical protein CGI_10013608 [Crassostrea gigas]
TR30467_c0_g1	--	--	--	--	[I]	Lipid transport and metabolism	Histidine phosphatase superfamily (branch 2)	Putative acid phosphatase 5 (Precursor) GN=pho-5 OS=Caenorhabditis elegans PE=1 SV=3	PREDICTED: lysosomal acid phosphatase-like [Amphimedon queenslandica]
TR25128_c1_g1	--	--	--	--	[S]	Function unknown	Cadherin domain	Protocadherin-like wing polarity protein stan (Precursor) GN=stan OS=Drosophila melanogaster (Fruit fly) PE=1 SV=4	PREDICTED: protocadherin Fat 4-like isoform X2 [Crassostrea gigas]
TR46764_c0_g2	--	--	Molecular Function: metalloendopeptidase activity (GO:0004222);; Biological Process: proteolysis (GO:0006508);; Molecular Function: metal ion binding (GO:0046872);;	K01408|1e-129|rno:25700|Ide, INSDEGM	[O]	Posttranslational modification, protein turnover, chaperones	Insulinase (Peptidase family M16);; Peptidase M16 inactive domain	Insulin-degrading enzyme GN=Ide OS=Drosophila melanogaster (Fruit fly) PE=1 SV=4	hypothetical protein LOTGIDRAFT_232210 [Lottia gigantea]
TR26609_c1_g2	--	--	--	--	--	--	Hydrolethalus syndrome protein 1 C-terminus	--	PREDICTED: hydrolethalus syndrome protein 1 homolog [Crassostrea gigas]
TR51543_c1_g2	--	--	Molecular Function: binding (GO:0005488);;	--	[B]	Chromatin structure and dynamics	Myb-like DNA-binding domain;; Zinc finger, ZZ type;; Myb-like DNA-binding domain	Transcriptional adapter 2B OS=Drosophila melanogaster (Fruit fly) PE=1 SV=1	PREDICTED: transcriptional adapter 2-beta-like [Crassostrea gigas]
TR41591_c0_g2	--	--	--	--	[R]	General function prediction only	Acyltransferase family	Nose resistant to fluoxetine protein 6 (Precursor) GN=nrf-6 OS=Caenorhabditis elegans PE=1 SV=3	Nose resistant to fluoxetine protein 6 [Crassostrea gigas]
TR23297_c0_g1	--	--	--	--	--	--	Poly(ADP-ribose) polymerase catalytic domain	--	Poly [ADP-ribose] polymerase 14 [Crassostrea gigas]
TR52759_c0_g1	--	--	Molecular Function: catalytic activity (GO:0003824);; Biological Process: nucleic acid metabolic process (GO:0090304);;	--	--	--	--	--	endonuclease/reverse transcriptase, partial [Ostrea edulis]
TR47380_c0_g1	--	--	--	K08285|7e-33|oaa:100082209|MID1	[O]	Posttranslational modification, protein turnover, chaperones	Zinc finger, C3HC4 type (RING finger);; RING-type zinc-finger	RING finger domain and kelch repeat-containing protein DDB_G0271372 GN=DDB_G0271372 OS=Dictyostelium discoideum (Slime mold) PE=3 SV=1	PREDICTED: E3 ubiquitin-protein ligase Midline-1-like isoform X4 [Crassostrea gigas]
TR40097_c1_g1	--	--	Molecular Function: DNA binding (GO:0003677);; Molecular Function: metal ion binding (GO:0046872);;	--	[R]	General function prediction only	--	Transcription factor castor GN=cas OS=Drosophila melanogaster (Fruit fly) PE=1 SV=2	Zinc finger protein castor-like protein 1 [Crassostrea gigas]
TR23856_c3_g1	[L]	Replication, recombination and repair	Molecular Function: protein kinase activity (GO:0004672);; Molecular Function: binding (GO:0005488);; Biological Process: GPI anchor metabolic process (GO:0006505);; Biological Process: intracellular protein transport (GO:0006886);; Molecular Function: hydrolase activity, acting on ester bonds (GO:0016788);;	--	[U]	Intracellular trafficking, secretion, and vesicular transport	TLD	--	PREDICTED: TBC1 domain family member 24-like isoform X2 [Crassostrea gigas]
TR530_c0_g2	[K]	Transcription	Molecular Function: translation elongation factor activity (GO:0003746);; Cellular Component: nucleus (GO:0005634);; Biological Process: translational elongation (GO:0006414);; Molecular Function: zinc ion binding (GO:0008270);; Biological Process: positive regulation of DNA-templated transcription, elongation (GO:0032786);;	--	[K]	Transcription	Spt4/RpoE2 zinc finger	Transcription elongation factor SPT4 GN=spt4 OS=Drosophila melanogaster (Fruit fly) PE=1 SV=1	PREDICTED: transcription elongation factor SPT4-like isoform X1 [Aplysia californica]
TR23779_c0_g1	[J]	Translation, ribosomal structure and biogenesis	Molecular Function: threonine-tRNA ligase activity (GO:0004829);; Molecular Function: ATP binding (GO:0005524);; Cellular Component: cytoplasm (GO:0005737);; Biological Process: threonyl-tRNA aminoacylation (GO:0006435);;	K01868|0.0|phu:Phum_PHUM593540|Threonyl-tRNA synthetase, cytoplasmic, putative (EC:6.1.1.3)	[J]	Translation, ribosomal structure and biogenesis	tRNA synthetase class II core domain (G, H, P, S and T);; Anticodon binding domain;; TGS domain;; Threonyl and Alanyl tRNA synthetase second additional domain	Threonine--tRNA ligase, cytoplasmic GN=trs-1 OS=Caenorhabditis elegans PE=3 SV=1	PREDICTED: threonine--tRNA ligase, cytoplasmic-like isoform X1 [Crassostrea gigas]
TR52056_c0_g2	--	--	--	--	[O]	Posttranslational modification, protein turnover, chaperones	B-box zinc finger	--	PREDICTED: E3 ubiquitin-protein ligase TRIM33-like, partial [Amphimedon queenslandica]
TR41528_c0_g1	--	--	--	--	[T]	Signal transduction mechanisms	Calcium-binding EGF domain;; EGF domain;; Complement Clr-like EGF-like;; EGF-like domain	Transmembrane cell adhesion receptor mua-3 (Precursor) GN=mua-3 OS=Caenorhabditis elegans PE=1 SV=2	PREDICTED: uncharacterized protein LOC105335200 [Crassostrea gigas]
TR26657_c1_g1	[R]	General function prediction only	--	--	--	--	Hexamethylene bis-acetamide-inducible protein	Claspin homolog GN=CG32251 OS=Drosophila melanogaster (Fruit fly) PE=1 SV=1	Protein HEXIM1 [Crassostrea gigas]
TR39128_c0_g1	--	--	--	--	--	--	Protein of unknown function (DUF1115);; RWD domain	--	PREDICTED: RWD domain-containing protein 2B-like [Crassostrea gigas]
TR52850_c0_g1	--	--	--	--	--	--	--	--	Leucine-rich repeat-containing protein 15 [Crassostrea gigas]
TR23769_c7_g1	[R]	General function prediction only	--	--	[K]	Transcription	ARC105 or Med15 subunit of Mediator complex non-fungal	Mediator of RNA polymerase II transcription subunit 15 GN=MED15 OS=Aedes aegypti (Yellowfever mosquito) PE=3 SV=1	PREDICTED: mediator of RNA polymerase II transcription subunit 15-like [Crassostrea gigas]
TR1021_c0_g1	--	--	--	--	--	--	--	--	hypothetical protein CGI_10028433 [Crassostrea gigas]
TR25997_c1_g2	--	--	--	--	[S]	Function unknown	Snf7	Charged multivesicular body protein 7 GN=chmp7 OS=Dictyostelium discoideum (Slime mold) PE=3 SV=1	PREDICTED: charged multivesicular body protein 7-like [Crassostrea gigas]
TR17306_c0_g1	--	--	Molecular Function: catalytic activity (GO:0003824);; Biological Process: metabolic process (GO:0008152);; Molecular Function: zinc ion binding (GO:0008270);; Molecular Function: ubiquitin binding (GO:0043130);;	K10593|8e-32|bfo:BRAFLDRAFT_101562|hypothetical protein	[O]	Posttranslational modification, protein turnover, chaperones	--	E3 ubiquitin-protein ligase hyd GN=hyd OS=Drosophila melanogaster (Fruit fly) PE=1 SV=3	E3 ubiquitin-protein ligase UBR5 [Crassostrea gigas]
TR35962_c9_g21	[J]	Translation, ribosomal structure and biogenesis	Cellular Component: ribosome (GO:0005840);; Biological Process: ribosome biogenesis (GO:0042254);;	K02896|1e-48|xla:379128|rsl24d1, MGC53444, rlp24, rpl24, rpl24l, rvas3	[J]	Translation, ribosomal structure and biogenesis	--	Probable ribosome biogenesis protein RLP24 GN=RpL24-like OS=Drosophila melanogaster (Fruit fly) PE=1 SV=1	PREDICTED: probable ribosome biogenesis protein RLP24 [Crassostrea gigas]
TR22535_c0_g1	--	--	--	--	--	--	--	--	hypothetical protein CGI_10028582 [Crassostrea gigas]
TR16734_c0_g1	--	--	Molecular Function: protein dimerization activity (GO:0046983);;	K09068|9e-23|isc:IscW_ISCW010324|helix-loop-helix protein hen, putative	[K]	Transcription	Helix-loop-helix DNA-binding domain	Helix-loop-helix protein 13 OS=Caenorhabditis elegans PE=2 SV=1	PREDICTED: T-cell acute lymphocytic leukemia protein 1-like [Crassostrea gigas]
TR40226_c0_g1	--	--	Molecular Function: actin binding (GO:0003779);; Cellular Component: intracellular part (GO:0044424);;	--	[Z]	Cytoskeleton	Gelsolin repeat	Gelsolin-like protein 2 OS=Lumbricus terrestris (Common earthworm) PE=1 SV=1	PREDICTED: gelsolin-like protein 2-like isoform X1 [Aplysia californica]
TR15313_c0_g1	[R]	General function prediction only	Molecular Function: binding (GO:0005488);;	--	[R]	General function prediction only	Zinc finger, C2H2 type;; Zinc-finger double domain;; C2H2-type zinc finger;; zinc-finger C2H2-type;; Zinc-finger of C2H2 type;; C2H2-type zinc finger;; C2H2-type zinc ribbon;; Zinc-finger double-stranded RNA-binding;; Drought induced 19 protein (Di19), zinc-binding	Transcription factor che-1 GN=che-1 OS=Caenorhabditis elegans PE=1 SV=3	PREDICTED: zinc finger protein 112-like [Crassostrea gigas]
TR19084_c0_g1	--	--	--	--	[O]	Posttranslational modification, protein turnover, chaperones	Zinc finger, C3HC4 type (RING finger)	E3 ubiquitin-protein ligase cblA GN=cblA-2 OS=Dictyostelium discoideum (Slime mold) PE=1 SV=1	PREDICTED: E3 ubiquitin-protein ligase RNF34-like [Crassostrea gigas]
TR51153_c0_g1	--	--	--	--	--	--	--	--	PREDICTED: uncharacterized protein LOC105266874 [Fopius arisanus]
TR32829_c0_g1	--	--	--	--	--	--	--	--	hypothetical protein CGI_10010369 [Crassostrea gigas]
TR6535_c0_g1	--	--	--	--	--	--	--	--	PREDICTED: transcription intermediary factor 1-alpha-like [Crassostrea gigas]
TR7468_c0_g1	--	--	--	--	--	--	TIR domain;; TIR domain	--	PREDICTED: protein toll-like [Crassostrea gigas]
TR48117_c0_g1	--	--	Molecular Function: methyltransferase activity (GO:0008168);; Biological Process: mRNA metabolic process (GO:0016071);; Biological Process: methylation (GO:0032259);;	K14589|0.0|xla:443938|ftsjd2, MGC80283, MTr1	[A]	RNA processing and modification	FtsJ-like methyltransferase;; G-patch domain;; G-patch domain	Cap-specific mRNA (nucleoside-2&apos;-O-)-methyltransferase 1 GN=CG6379 OS=Drosophila melanogaster (Fruit fly) PE=2 SV=1	PREDICTED: cap-specific mRNA (nucleoside-2&apos;-O-)-methyltransferase 1-like [Crassostrea gigas]
TR15568_c0_g1	--	--	--	--	--	--	--	--	PREDICTED: collagen alpha-1(XXI) chain-like [Crassostrea gigas]
TR21216_c0_g1	--	--	--	--	--	--	Domain of unknown function (DUF4559)	--	--
TR11343_c0_g1	--	--	--	--	--	--	--	Putative uncharacterized protein DDB_G0271606 GN=DDB_G0271606 OS=Dictyostelium discoideum (Slime mold) PE=4 SV=1	AAEL006825-PA [Aedes aegypti]
TR58940_c1_g1	--	--	--	K11649|3e-07|cbr:CBG12912|Cbr-psa-1	[K]	Transcription	--	Cell death-inducing p53-target protein 1 homolog GN=litaf OS=Dictyostelium discoideum (Slime mold) PE=3 SV=1	hypothetical protein CGI_10013456 [Crassostrea gigas]
TR42470_c0_g1	--	--	--	--	--	--	Cordon-bleu ubiquitin-like domain	--	PREDICTED: fibrous sheath CABYR-binding protein-like isoform X5 [Crassostrea gigas]
TR13691_c0_g1	--	--	--	K08881|7e-06|dre:442869|trim24, tif1a, tifa, wu:fi24g04	--	--	--	--	Tripartite motif-containing protein 45 [Crassostrea gigas]
TR26172_c0_g2	--	--	--	--	--	--	--	--	PREDICTED: uncharacterized protein LOC105338516 [Crassostrea gigas]
TR50246_c1_g1	--	--	--	--	[S]	Function unknown	Pre-mRNA splicing factor	Uncharacterized protein DDB_G0283697 GN=DDB_G0283697 OS=Dictyostelium discoideum (Slime mold) PE=4 SV=1	PREDICTED: pre-mRNA-splicing factor CWC25 homolog [Crassostrea gigas]
TR57475_c1_g1	--	--	--	--	--	--	Hypoxia induced protein conserved region	--	hypothetical protein X975_06173, partial [Stegodyphus mimosarum]
TR25810_c1_g1	--	--	Biological Process: cellular process (GO:0009987);; Cellular Component: intracellular part (GO:0044424);;	K08268|1e-124|tca:655772|similar to hypoxia-inducible factor 1 alpha	[TK]	--	PAS domain;; PAS fold;; PAS fold;; PAS domain;; HIF-1 alpha C terminal transactivation domain	Protein similar GN=sima OS=Drosophila melanogaster (Fruit fly) PE=1 SV=2	hypoxia inducible factor-1alpha [Haliotis diversicolor]
TR46629_c0_g1	--	--	--	--	[R]	General function prediction only	--	--	Membrane-associated guanylate kinase, WW and PDZ domain-containing protein 1 [Crassostrea gigas]
TR671_c0_g1	--	--	Molecular Function: G-protein coupled GABA receptor activity (GO:0004965);; Biological Process: G-protein coupled receptor signaling pathway (GO:0007186);; Cellular Component: integral component of membrane (GO:0016021);;	--	--	--	--	--	hypothetical protein CGI_10018942 [Crassostrea gigas]
TR17340_c0_g3	--	--	Molecular Function: transferase activity (GO:0016740);;	--	[Z]	Cytoskeleton	Immunoglobulin domain;; Immunoglobulin I-set domain;; Immunoglobulin C1-set domain;; Immunoglobulin domain;; Immunoglobulin domain	Twitchin {ECO:0000303|PubMed:7190524} OS=Caenorhabditis elegans PE=1 SV=3	PREDICTED: twitchin-like [Crassostrea gigas]
TR3896_c1_g1	--	--	--	--	--	--	--	--	hypothetical protein CGI_10010419 [Crassostrea gigas]
TR58267_c1_g2	--	--	Molecular Function: G-protein coupled receptor activity (GO:0004930);; Biological Process: G-protein coupled receptor signaling pathway (GO:0007186);;	--	[R]	General function prediction only	7 transmembrane receptor (rhodopsin family);; Serpentine type 7TM GPCR chemoreceptor Srv;; Serpentine type 7TM GPCR chemoreceptor Srw	Tachykinin-like peptides receptor 86C GN=TkR86C OS=Drosophila melanogaster (Fruit fly) PE=2 SV=2	hypothetical protein LOTGIDRAFT_102897, partial [Lottia gigantea]
TR54030_c0_g2	--	--	--	--	--	--	--	--	PREDICTED: uncharacterized protein LOC105348115 [Crassostrea gigas]
TR35957_c2_g4	--	--	--	--	[T]	Signal transduction mechanisms	--	EGF-like domain-containing protein 2 (Precursor) OS=Lottia gigantea (Giant owl limpet) PE=1 SV=1	PREDICTED: G8 domain-containing protein DDB_G0286311-like [Crassostrea gigas]
TR31514_c0_g1	--	--	--	--	--	--	--	--	Putative RNA-directed DNA polymerase from transposon BS [Crassostrea gigas]
TR27191_c0_g1	--	--	--	--	--	--	Ependymin	--	PREDICTED: uncharacterized protein LOC105334043 isoform X2 [Crassostrea gigas]
TR57364_c1_g2	--	--	Biological Process: intracellular protein transport (GO:0006886);; Molecular Function: zinc ion binding (GO:0008270);; Biological Process: vesicle-mediated transport (GO:0016192);;	--	[U]	Intracellular trafficking, secretion, and vesicular transport	Pep3/Vps18/deep orange family	Vacuolar protein sorting-associated protein 18 homolog GN=dor OS=Drosophila melanogaster (Fruit fly) PE=1 SV=3	PREDICTED: vacuolar protein sorting-associated protein 18 homolog [Crassostrea gigas]
TR36705_c0_g1	--	--	--	K08883|3e-11|xla:733198|trim33, ptc7, rfg7, tf1g, tif1g, tif1gamma, tifgamma	[O]	Posttranslational modification, protein turnover, chaperones	B-box zinc finger	Uncharacterized protein PF11_0207 GN=PF11_0207 OS=Plasmodium falciparum (isolate 3D7) PE=4 SV=2	PREDICTED: tripartite motif-containing protein 59-like [Crassostrea gigas]
TR17586_c0_g1	--	--	Biological Process: metabolic process (GO:0008152);; Molecular Function: zinc ion binding (GO:0008270);; Molecular Function: ligase activity (GO:0016874);;	K10660|1e-137|ecb:100061898|hypothetical protein LOC100061898	[S]	Function unknown	RING-variant domain	--	hypothetical protein LOTGIDRAFT_214381 [Lottia gigantea]
TR9913_c1_g1	--	--	--	--	--	--	--	Uncharacterized protein DDB_G0271670 (Precursor) GN=DDB_G0271670 OS=Dictyostelium discoideum (Slime mold) PE=3 SV=1	hypothetical protein CGI_10009469 [Crassostrea gigas]
TR13867_c0_g1	[S]	Function unknown	Cellular Component: nucleus (GO:0005634);; Cellular Component: chromosome (GO:0005694);; Molecular Function: zinc ion binding (GO:0008270);; Molecular Function: histone-lysine N-methyltransferase activity (GO:0018024);; Biological Process: histone lysine methylation (GO:0034968);;	--	[T]	Signal transduction mechanisms	TraB family	--	hypothetical protein LOTGIDRAFT_113686, partial [Lottia gigantea]
TR17641_c1_g1	[R]	General function prediction only	--	K09228|1e-24|bfo:BRAFLDRAFT_71028|hypothetical protein	[R]	General function prediction only	Zinc-finger double domain;; Zinc finger, C2H2 type;; C2H2-type zinc finger	Homeotic protein spalt-major GN=salm OS=Drosophila virilis (Fruit fly) PE=2 SV=1	hypothetical protein BRAFLDRAFT_71028 [Branchiostoma floridae]
TR37672_c0_g1	[E]	Amino acid transport and metabolism	Cellular Component: glycine cleavage complex (GO:0005960);; Biological Process: glycine decarboxylation via glycine cleavage system (GO:0019464);;	K02437|8e-46|pon:100450790|glycine cleavage system H protein, mitochondrial-like	[E]	Amino acid transport and metabolism	Glycine cleavage H-protein	Glycine cleavage system H protein, mitochondrial (Precursor) GN=ppl OS=Drosophila melanogaster (Fruit fly) PE=2 SV=1	hypothetical protein LOTGIDRAFT_114684, partial [Lottia gigantea]
TR10101_c0_g1	--	--	--	--	--	--	Sulfotransferase domain	--	PREDICTED: WSC domain-containing protein 1 [Strongylocentrotus purpuratus]
TR49701_c0_g2	--	--	Molecular Function: ion channel activity (GO:0005216);; Biological Process: transport (GO:0006810);; Cellular Component: membrane (GO:0016020);; Biological Process: biological_process (GO:0044699);;	K05313|8e-53|ame:411220|ionotropic glutamate receptor	[PET]	--	Ligand-gated ion channel;; Bacterial extracellular solute-binding proteins, family 3;; Ligated ion channel L-glutamate- and glycine-binding site	Glutamate receptor 1 (Precursor) GN=GluRIA OS=Drosophila melanogaster (Fruit fly) PE=2 SV=2	PREDICTED: glutamate receptor ionotropic, kainate 3-like [Crassostrea gigas]
TR11171_c0_g1	--	--	--	--	--	--	--	--	hypothetical protein CGI_10005551 [Crassostrea gigas]
TR38430_c0_g1	--	--	--	--	--	--	Amyotrophic lateral sclerosis 2 chromosomal region candidate gene 8	--	PREDICTED: uncharacterized protein LOC579416 [Strongylocentrotus purpuratus]
TR46211_c1_g1	[L]	Replication, recombination and repair	--	--	--	--	--	Putative leucine-rich repeat-containing protein DDB_G0290503 GN=DDB_G0290503 OS=Dictyostelium discoideum (Slime mold) PE=3 SV=1	PREDICTED: coiled-coil domain-containing protein 89-like isoform X2 [Crassostrea gigas]
TR56426_c0_g1	--	--	--	--	--	--	--	--	hypothetical protein LOTGIDRAFT_162235 [Lottia gigantea]
TR45257_c0_g1	--	--	--	--	--	--	--	--	hypothetical protein LOTGIDRAFT_169531 [Lottia gigantea]
TR50390_c0_g1	[TZDR]	--	Cellular Component: organelle (GO:0043226);; Cellular Component: cell part (GO:0044464);; Molecular Function: metal ion binding (GO:0046872);;	K02183|2e-10|spu:575365|similar to calmodulin 2	[T]	Signal transduction mechanisms	EF hand;; EF-hand domain pair;; EF-hand domain;; EF hand	Calmodulin OS=Trypanosoma brucei gambiense PE=3 SV=2	PREDICTED: calmodulin-A-like [Crassostrea gigas]
TR84_c0_g1	[R]	General function prediction only	Molecular Function: sulfotransferase activity (GO:0008146);; Biological Process: metabolic process (GO:0008152);;	--	[T]	Signal transduction mechanisms	Rab-GTPase-TBC domain	Ecotropic viral integration site 5 ortholog GN=Evi5 OS=Drosophila melanogaster (Fruit fly) PE=1 SV=3	PREDICTED: TBC1 domain family member 25-like [Crassostrea gigas]
TR42619_c0_g1	[L]	Replication, recombination and repair	--	--	--	--	Integrase core domain	Endonuclease GN=POL OS=Drosophila melanogaster (Fruit fly) PE=3 SV=1	PREDICTED: gypsy retrotransposon integrase-like protein 1-like [Saccoglossus kowalevskii]
TR21784_c0_g1	--	--	Biological Process: open tracheal system development (GO:0007424);; Biological Process: anatomical structure morphogenesis (GO:0009653);; Biological Process: tissue development (GO:0009888);; Biological Process: cellular process (GO:0044763);;	--	--	--	Dof, BCAP, and BANK (DBB) motif,	--	hypothetical protein LOTGIDRAFT_154659 [Lottia gigantea]
TR14246_c0_g1	--	--	--	--	--	--	--	--	hypothetical protein X975_25077, partial [Stegodyphus mimosarum]
TR26244_c0_g1	--	--	--	--	--	--	--	--	hypothetical protein CAPTEDRAFT_209590 [Capitella teleta]
TR6656_c0_g2	--	--	--	--	--	--	Domain of unknown function (DUF758)	Tumor necrosis factor alpha-induced protein 8-like protein GN=GA17951 OS=Drosophila pseudoobscura pseudoobscura (Fruit fly) PE=3 SV=1	tumor necrosis factor alpha-induced protein 8-like protein [Hyriopsis cumingii]
TR28273_c0_g1	--	--	--	--	[OW]	--	Matrixin;; Hemopexin;; Putative peptidoglycan binding domain	15 kDa peptide (Precursor) OS=Hemicentrotus pulcherrimus (Sea urchin) PE=1 SV=1	hypothetical protein LOTGIDRAFT_231475 [Lottia gigantea]
TR33902_c0_g1	[Z]	Cytoskeleton	Molecular Function: GTPase activity (GO:0003924);; Molecular Function: structural constituent of cytoskeleton (GO:0005200);; Molecular Function: GTP binding (GO:0005525);; Cellular Component: cytoplasm (GO:0005737);; Cellular Component: microtubule (GO:0005874);; Biological Process: microtubule-based process (GO:0007017);; Biological Process: metabolic process (GO:0008152);; Biological Process: p…	--	[Z]	Cytoskeleton	Tubulin/FtsZ family, GTPase domain;; Misato Segment II tubulin-like domain	Tubulin beta chain OS=Paracentrotus lividus (Common sea urchin) PE=2 SV=1	hypothetical protein LOTGIDRAFT_69672, partial [Lottia gigantea]
TR38419_c0_g1	--	--	--	--	--	--	--	Salivary glue protein Sgs-3 (Precursor) GN=Sgs3 OS=Drosophila melanogaster (Fruit fly) PE=2 SV=1	vitelline envelope zona pellucida domain 14, partial [Haliotis walallensis]
TR38234_c0_g1	--	--	--	--	--	--	--	--	PREDICTED: tripartite motif-containing protein 2-like [Crassostrea gigas]
TR35263_c1_g4	[C]	Energy production and conversion	Molecular Function: oxidoreductase activity, acting on the aldehyde or oxo group of donors, disulfide as acceptor (GO:0016624);; Biological Process: oxidation-reduction process (GO:0055114);;	K00166|4e-55|dre:554124|bckdha, wu:fd20d04, zgc:110049	[C]	Energy production and conversion	Dehydrogenase E1 component	2-oxoisovalerate dehydrogenase subunit alpha, mitochondrial (Precursor) GN=Y39E4A.3 OS=Caenorhabditis elegans PE=1 SV=2	hypothetical protein LOTGIDRAFT_202459 [Lottia gigantea]
TR55309_c0_g1	[L]	Replication, recombination and repair	--	K12646|6e-74|tgu:100222705|similar to DEAD/H (Asp-Glu-Ala-Asp/His) box polypeptide RIG-I	[R]	General function prediction only	C-terminal domain of RIG-I;; Helicase conserved C-terminal domain;; Trypsin-like peptidase domain	Endoribonuclease dcr-1 GN=dcr-1 OS=Caenorhabditis elegans PE=1 SV=3	hypothetical protein LOTGIDRAFT_142329 [Lottia gigantea]
TR47728_c0_g2	--	--	--	--	[R]	General function prediction only	Reverse transcriptase (RNA-dependent DNA polymerase)	RNA-directed DNA polymerase from mobile element jockey GN=pol OS=Drosophila melanogaster (Fruit fly) PE=1 SV=1	predicted protein [Nematostella vectensis]
TR31898_c0_g2	--	--	--	--	[T]	Signal transduction mechanisms	7 transmembrane receptor (Secretin family)	Probable G-protein coupled receptor Mth-like 3 (Precursor) GN=mthl3 OS=Drosophila melanogaster (Fruit fly) PE=1 SV=3	hypothetical protein CAPTEDRAFT_63867, partial [Capitella teleta]
TR23943_c3_g1	--	--	--	--	[O]	Posttranslational modification, protein turnover, chaperones	B-box zinc finger	--	PREDICTED: uncharacterized protein LOC105319377 isoform X1 [Crassostrea gigas]
TR54391_c0_g1	--	--	Molecular Function: microtubule motor activity (GO:0003777);; Molecular Function: ATP binding (GO:0005524);; Biological Process: microtubule-based movement (GO:0007018);; Biological Process: metabolic process (GO:0008152);; Cellular Component: membrane (GO:0016020);; Molecular Function: ATPase activity (GO:0016887);; Cellular Component: dynein complex (GO:0030286);; Cellular Component: cell proje…	K10414|2e-71|nve:NEMVE_v1g244113|hypothetical protein	[Z]	Cytoskeleton	--	Cytoplasmic dynein 2 heavy chain 1 GN=DYH1B OS=Tripneustes gratilla (Hawaian sea urchin) PE=2 SV=2	PREDICTED: cytoplasmic dynein 2 heavy chain 1-like isoform X1 [Crassostrea gigas]
TR21364_c4_g1	--	--	Molecular Function: binding (GO:0005488);;	--	[T]	Signal transduction mechanisms	MAM domain, meprin/A5/mu;; EGF-like domain;; Calcium-binding EGF domain;; Human growth factor-like EGF;; EGF-like domain;; EGF domain	MAM and LDL-receptor class A domain-containing protein 2 (Fragment) OS=Acropora millepora (Staghorn coral) PE=1 SV=1	hypothetical protein TRIADDRAFT_53242 [Trichoplax adhaerens]
TR15027_c0_g1	[M]	Cell wall/membrane/envelope biogenesis	Biological Process: immune system process (GO:0002376);; Molecular Function: hydrolase activity (GO:0016787);;	K01446|1e-38|spu:760063|similar to peptidoglycan recognition protein SC2	--	--	N-acetylmuramoyl-L-alanine amidase	Peptidoglycan-recognition protein SC2 (Precursor) GN=PGRP-SC2 OS=Drosophila simulans (Fruit fly) PE=3 SV=1	peptidoglycan-recognition protein-SC2 precursor-like protein [Brachionus manjavacas]
TR39004_c0_g1	--	--	--	--	[T]	Signal transduction mechanisms	Fibronectin type III domain	Protein sidekick (Precursor) GN=sdk OS=Drosophila melanogaster (Fruit fly) PE=1 SV=2	hypothetical protein LOTGIDRAFT_106770, partial [Lottia gigantea]
TR32002_c3_g3	--	--	--	--	--	--	--	--	hypothetical protein CGI_10008167 [Crassostrea gigas]
TR7483_c0_g1	[R]	General function prediction only	--	--	[K]	Transcription	Ankyrin repeats (3 copies);; Ankyrin repeats (many copies);; Ankyrin repeats (many copies);; Ankyrin repeat;; Ankyrin repeat	Delta-latroinsectotoxin-Lt1a (Precursor) OS=Latrodectus tredecimguttatus (Mediterranean black widow spider) PE=1 SV=1	PREDICTED: ankyrin repeat domain-containing protein 49-like isoform X1 [Crassostrea gigas]
TR13938_c0_g1	--	--	--	--	--	--	--	--	PREDICTED: uncharacterized protein LOC105330858 isoform X3 [Crassostrea gigas]
TR18780_c1_g2	[R]	General function prediction only	--	--	--	--	Interferon-inducible GTPase (IIGP);; 50S ribosome-binding GTPase;; Interferon-inducible GTPase (IIGP)	--	GTPase [Acanthamoeba castellanii str. Neff]
TR6574_c4_g1	--	--	--	K04725|5e-52|phu:Phum_PHUM080100|Baculoviral IAP repeat-containing protein, putative	[DR]	--	Inhibitor of Apoptosis domain;; Zinc finger, C3HC4 type (RING finger)	Apoptosis 1 inhibitor GN=th OS=Drosophila melanogaster (Fruit fly) PE=1 SV=2	PREDICTED: putative inhibitor of apoptosis isoform X3 [Crassostrea gigas]
TR5992_c0_g1	--	--	--	--	--	--	--	--	PREDICTED: uncharacterized protein LOC105317455 [Crassostrea gigas]
TR48044_c0_g1	--	--	--	--	[T]	Signal transduction mechanisms	von Willebrand factor type D domain	Hemocytin (Precursor) OS=Bombyx mori (Silk moth) PE=2 SV=1	hypothetical protein LOTGIDRAFT_158683 [Lottia gigantea]
TR11307_c0_g1	[T]	Signal transduction mechanisms	Biological Process: protein dephosphorylation (GO:0006470);; Molecular Function: protein tyrosine/serine/threonine phosphatase activity (GO:0008138);;	K04459|3e-77|mcc:714290|DUSP4	[V]	Defense mechanisms	Dual specificity phosphatase, catalytic domain;; Rhodanese-like domain;; Protein-tyrosine phosphatase	Tyrosine-protein phosphatase vhp-1 GN=vhp-1 OS=Caenorhabditis elegans PE=2 SV=2	Dual specificity protein phosphatase 4 [Crassostrea gigas]
TR34393_c3_g1	--	--	--	--	--	--	--	--	hypothetical protein CGI_10022268 [Crassostrea gigas]
TR7531_c0_g1	--	--	--	--	--	--	--	--	hypothetical protein LOTGIDRAFT_103213 [Lottia gigantea]
TR39784_c0_g1	--	--	--	--	--	--	von Willebrand factor type C domain	--	PREDICTED: von Willebrand factor C domain-containing protein 2-like [Crassostrea gigas]
TR1914_c0_g1	--	--	--	--	--	--	Cytochrome P450	--	predicted protein [Nematostella vectensis]
TR45132_c1_g1	--	--	Molecular Function: protein tyrosine phosphatase activity (GO:0004725);; Cellular Component: cytoskeleton (GO:0005856);; Biological Process: peptidyl-tyrosine dephosphorylation (GO:0035335);;	K01104|3e-46|bfo:BRAFLDRAFT_216945|hypothetical protein	[T]	Signal transduction mechanisms	FERM N-terminal domain	Protein 4.1 homolog GN=cora OS=Drosophila melanogaster (Fruit fly) PE=1 SV=1	PREDICTED: tyrosine-protein phosphatase non-receptor type 14-like isoform X2 [Crassostrea gigas]
TR23100_c0_g1	--	--	Cellular Component: plasma membrane (GO:0005886);; Cellular Component: gap junction (GO:0005921);; Biological Process: ion transport (GO:0006811);; Cellular Component: integral component of membrane (GO:0016021);;	--	--	--	Innexin	Innexin unc-9 GN=unc-9 OS=Caenorhabditis elegans PE=2 SV=1	PREDICTED: innexin unc-9-like [Crassostrea gigas]
TR14932_c0_g1	--	--	--	--	--	--	--	--	hypothetical protein LOTGIDRAFT_166855 [Lottia gigantea]
TR10615_c0_g1	--	--	--	K13718|9e-16|nve:NEMVE_v1g94898|hypothetical protein	[TO]	--	OTU-like cysteine protease	Protein ovarian tumor locus GN=otu OS=Drosophila melanogaster (Fruit fly) PE=2 SV=2	hypothetical protein LOTGIDRAFT_163820 [Lottia gigantea]
TR57668_c0_g1	--	--	--	--	[O]	Posttranslational modification, protein turnover, chaperones	B-box zinc finger	--	PREDICTED: transcription intermediary factor 1-alpha-like [Crassostrea gigas]
TR29331_c1_g2	[Z]	Cytoskeleton	--	--	[T]	Signal transduction mechanisms	RUN domain	Myosin-3 GN=myo-3 OS=Caenorhabditis elegans PE=2 SV=1	PREDICTED: RUN and FYVE domain-containing protein 2-like isoform X1 [Crassostrea gigas]
TR13708_c0_g1	--	--	--	--	--	--	--	--	PREDICTED: sushi, von Willebrand factor type A, EGF and pentraxin domain-containing protein 1-like [Saccoglossus kowalevskii]
TR58060_c0_g1	--	--	--	K04725|4e-42|xla:100137653|birc7-b, EIAP/XLX-B, XLX, birc7b, kiap, livin, ml-iap, mliap, rnf50, xEIAP	[DR]	--	Inhibitor of Apoptosis domain;; Zinc finger, C3HC4 type (RING finger)	Apoptosis 1 inhibitor GN=th OS=Drosophila melanogaster (Fruit fly) PE=1 SV=2	PREDICTED: baculoviral IAP repeat-containing protein 7-B-like [Crassostrea gigas]
TR35960_c0_g2	--	--	--	--	--	--	von Willebrand factor type D domain	--	von Willebrand factor D and EGF domain-containing protein [Crassostrea gigas]
TR52551_c0_g1	--	--	--	--	--	--	--	Probable inactive protein kinase DDB_G0270444 GN=DDB_G0270444 OS=Dictyostelium discoideum (Slime mold) PE=1 SV=1	hypothetical protein, conserved in Plasmodium species [Plasmodium knowlesi strain H]
TR4657_c0_g1	--	--	--	K10594|1e-11|ptr:453500|HERC1	[S]	Function unknown	--	--	Putative E3 ubiquitin-protein ligase HERC1 [Crassostrea gigas]
TR23566_c0_g1	--	--	Molecular Function: binding (GO:0005488);; Biological Process: cellular process (GO:0009987);;	--	[T]	Signal transduction mechanisms	Zinc finger, C4 type (two domains)	Nuclear hormone receptor E75 GN=E75 OS=Metapenaeus ensis (Greasyback shrimp) PE=2 SV=1	PREDICTED: nuclear receptor ROR-beta-like isoform X2 [Crassostrea gigas]
TR15437_c2_g1	--	--	Cellular Component: membrane (GO:0016020);;	--	[E]	Amino acid transport and metabolism	Transmembrane amino acid transporter protein	Sodium-coupled neutral amino acid transporter 9 homolog GN=F13H10.3 OS=Caenorhabditis elegans PE=3 SV=2	PREDICTED: putative sodium-coupled neutral amino acid transporter 9 isoform X3 [Crassostrea gigas]
TR13904_c0_g1	--	--	--	--	--	--	--	MATH and LRR domain-containing protein PFE0570w GN=PFE0570w OS=Plasmodium falciparum (isolate 3D7) PE=2 SV=1	conserved Plasmodium protein, unknown function [Plasmodium reichenowi]
TR31670_c0_g1	--	--	--	--	--	--	--	--	PREDICTED: uncharacterized protein LOC100891119 [Strongylocentrotus purpuratus]
TR16779_c0_g1	--	--	--	--	--	--	--	Circumsporozoite protein (Precursor) OS=Plasmodium falciparum (isolate t4 / Thailand) PE=3 SV=1	PREDICTED: hypothetical protein LOC100746493 [Bombus impatiens]
TR51749_c1_g1	--	--	--	--	--	--	--	--	PREDICTED: uncharacterized protein C8orf34-like, partial [Crassostrea gigas]
TR16774_c0_g1	[E]	Amino acid transport and metabolism	Molecular Function: lyase activity (GO:0016829);; Biological Process: cellular metabolic process (GO:0044237);; Biological Process: primary metabolic process (GO:0044238);; Molecular Function: metal ion binding (GO:0046872);; Biological Process: organic substance metabolic process (GO:0071704);;	K01620|1e-120|cqu:CpipJ_CPIJ012034|L-allo-threonine aldolase	[E]	Amino acid transport and metabolism	Beta-eliminating lyase	Uncharacterized protein R102.4 GN=R102.4 OS=Caenorhabditis elegans PE=3 SV=3	PREDICTED: probable low-specificity L-threonine aldolase 2 [Crassostrea gigas]
TR50807_c0_g2	--	--	--	--	--	--	--	--	PREDICTED: MCM domain-containing protein 2-like [Crassostrea gigas]
TR44799_c0_g1	--	--	Molecular Function: DNA binding (GO:0003677);; Biological Process: transcription, DNA-templated (GO:0006351);; Molecular Function: metal ion binding (GO:0046872);; Biological Process: regulation of cellular process (GO:0050794);;	K08705|1e-131|tca:658929|similar to CG4059-PB, isoform B	[K]	Transcription	Zinc finger, C4 type (two domains);; Ligand-binding domain of nuclear hormone receptor	Nuclear hormone receptor FTZ-F1 GN=FTZ-F1 OS=Bombyx mori (Silk moth) PE=1 SV=2	PREDICTED: steroidogenic factor 1-like isoform X3 [Crassostrea gigas]
TR39237_c0_g1	[R]	General function prediction only	Molecular Function: transferase activity (GO:0016740);;	K11424|0.0|bfo:BRAFLDRAFT_99284|hypothetical protein	[K]	Transcription	PWWP domain;; SET domain;; PHD-finger	Probable histone-lysine N-methyltransferase Mes-4 GN=Mes-4 OS=Drosophila melanogaster (Fruit fly) PE=1 SV=2	PREDICTED: histone-lysine N-methyltransferase NSD2-like isoform X1 [Aplysia californica]
TR51732_c2_g7	--	--	--	K13210|1e-17|bfo:BRAFLDRAFT_124476|hypothetical protein	[A]	RNA processing and modification	KH domain	--	PREDICTED: far upstream element-binding protein 3-like isoform X5 [Crassostrea gigas]
TR1407_c0_g1	--	--	--	--	--	--	--	--	PREDICTED: uncharacterized protein LOC101858607 isoform X1 [Aplysia californica]
TR52532_c0_g3	--	--	Molecular Function: metal ion binding (GO:0046872);;	--	[O]	Posttranslational modification, protein turnover, chaperones	Zinc finger C-x8-C-x5-C-x3-H type (and similar)	Myb-like protein F GN=mybF OS=Dictyostelium discoideum (Slime mold) PE=3 SV=1	hypothetical protein X975_13573, partial [Stegodyphus mimosarum]
TR23797_c1_g1	--	--	--	K14686|4e-46|tca:660576|similar to CG3977-PA	[P]	Inorganic ion transport and metabolism	Ctr copper transporter family	Protein P80 (Precursor) GN=p80 OS=Dictyostelium discoideum (Slime mold) PE=2 SV=1	PREDICTED: high affinity copper uptake protein 1-like isoform X1 [Crassostrea gigas]
TR33405_c0_g1	[U]	Intracellular trafficking, secretion, and vesicular transport	Biological Process: vesicle docking involved in exocytosis (GO:0006904);;	--	[U]	Intracellular trafficking, secretion, and vesicular transport	Sec1 family	Vacuolar protein sorting-associated protein 33A GN=car OS=Drosophila melanogaster (Fruit fly) PE=1 SV=1	PREDICTED: vacuolar protein sorting-associated protein 33A-like [Crassostrea gigas]
TR19016_c0_g1	--	--	--	--	--	--	Protein of unknown function (DUF3695)	--	PREDICTED: uncharacterized protein C1orf194 homolog isoform X1 [Crassostrea gigas]
TR22577_c0_g1	--	--	--	--	--	--	Macro domain	--	PREDICTED: uncharacterized protein LOC105325172 isoform X2 [Crassostrea gigas]
TR31921_c1_g1	[R]	General function prediction only	--	K10380|0.0|tca:100142605|similar to ankyrin 2,3/unc44	[M]	Cell wall/membrane/envelope biogenesis	Ankyrin repeats (3 copies);; Ankyrin repeat;; Ankyrin repeats (many copies);; Ankyrin repeats (many copies);; Ankyrin repeat;; ZU5 domain;; Death domain	Tankyrase OS=Drosophila melanogaster (Fruit fly) PE=1 SV=1	PREDICTED: ankyrin-2-like isoform X5 [Crassostrea gigas]
TR33414_c0_g1	[S]	Function unknown	Biological Process: transport (GO:0006810);; Biological Process: metabolic process (GO:0008152);; Molecular Function: peptidase activity (GO:0008233);;	--	[T]	Signal transduction mechanisms	Leucine-rich repeat;; Leucine Rich repeats (2 copies)	Protein tilB GN=tilB OS=Drosophila melanogaster (Fruit fly) PE=1 SV=1	PREDICTED: protein tilB homolog [Crassostrea gigas]
TR48187_c0_g1	--	--	--	--	--	--	XPG domain containing	Protein asteroid GN=ast OS=Drosophila melanogaster (Fruit fly) PE=2 SV=1	hypothetical protein LOTGIDRAFT_227013, partial [Lottia gigantea]
TR6276_c1_g1	--	--	Molecular Function: transcription factor activity, sequence-specific DNA binding (GO:0003700);; Cellular Component: nucleus (GO:0005634);; Biological Process: regulation of transcription, DNA-templated (GO:0006355);; Molecular Function: sequence-specific DNA binding (GO:0043565);;	--	[K]	Transcription	--	--	fork-head box Q2/QM transcription factor [Saccoglossus kowalevskii]
TR21680_c2_g1	--	--	--	--	[O]	Posttranslational modification, protein turnover, chaperones	B-box zinc finger	--	PREDICTED: uncharacterized protein LOC105346970 [Crassostrea gigas]
TR23923_c2_g1	--	--	--	--	[U]	Intracellular trafficking, secretion, and vesicular transport	--	Futsch light chain LC(f) GN=futsch OS=Drosophila melanogaster (Fruit fly) PE=1 SV=4	PREDICTED: myosin-2 heavy chain-like [Crassostrea gigas]
TR57635_c0_g1	[F]	Nucleotide transport and metabolism	Molecular Function: methylated-DNA-[protein]-cysteine S-methyltransferase activity (GO:0003908);; Molecular Function: xanthine dehydrogenase activity (GO:0004854);; Molecular Function: xanthine oxidase activity (GO:0004855);; Molecular Function: iron ion binding (GO:0005506);; Cellular Component: peroxisome (GO:0005777);; Biological Process: DNA repair (GO:0006281);; Molecular Function: UDP-N-ace…	K00106|2e-88|pon:100454383|xanthine dehydrogenase/oxidase-like	[F]	Nucleotide transport and metabolism	[2Fe-2S] binding domain;; 2Fe-2S iron-sulfur cluster binding domain	Xanthine dehydrogenase GN=XDH OS=Calliphora vicina (Blue blowfly) PE=2 SV=1	PREDICTED: xanthine dehydrogenase/oxidase-like [Crassostrea gigas]
TR55434_c0_g1	--	--	--	--	--	--	--	Uncharacterized protein DDB_G0271670 (Precursor) GN=DDB_G0271670 OS=Dictyostelium discoideum (Slime mold) PE=3 SV=1	proteophosphoglycan ppg1 [Leishmania mexicana MHOM/GT/2001/U1103]
TR45872_c0_g1	--	--	--	K04194|5e-25|ecb:100055506|CCKAR	[R]	General function prediction only	7 transmembrane receptor (rhodopsin family)	Putative neuropeptide Y receptor 11 GN=npr-11 OS=Caenorhabditis elegans PE=3 SV=2	PREDICTED: cholecystokinin receptor type A-like [Crassostrea gigas]
TR25668_c0_g1	[Q]	Secondary metabolites biosynthesis, transport and catabolism	Biological Process: metabolic process (GO:0008152);; Molecular Function: hydrolase activity (GO:0016787);;	--	[R]	General function prediction only	Fumarylacetoacetate (FAA) hydrolase family	Fumarylacetoacetate hydrolase domain-containing protein 2 homolog GN=fahd2 OS=Dictyostelium discoideum (Slime mold) PE=3 SV=1	hypothetical protein LOTGIDRAFT_216279 [Lottia gigantea]
TR51740_c4_g1	[TZDR]	--	Molecular Function: metal ion binding (GO:0046872);;	K02183|4e-54|mdo:100015722|hypothetical protein LOC100015722	[T]	Signal transduction mechanisms	EF-hand domain pair;; EF hand;; EF-hand domain pair;; EF-hand domain;; EF-hand domain;; EF hand;; Secreted protein acidic and rich in cysteine Ca binding region;; Cytoskeletal-regulatory complex EF hand	Calmodulin OS=Suberites domuncula (Sponge) PE=2 SV=3	RecName: Full=Calmodulin; Short=CaM [Suberites domuncula]
TR32054_c0_g1	--	--	--	--	--	--	--	--	PREDICTED: sodium-dependent glucose transporter 1-like [Crassostrea gigas]
TR48911_c0_g1	--	--	--	--	--	--	TLD	--	Interferon-induced protein 44-like protein [Crassostrea gigas]
TR4283_c0_g2	--	--	--	--	--	--	--	--	Heat shock 70 kDa protein 12A [Crassostrea gigas]
TR32846_c2_g2	--	--	--	--	--	--	--	--	Putative RNA-directed DNA polymerase from transposon BS [Crassostrea gigas]
TR17598_c0_g1	[Q]	Secondary metabolites biosynthesis, transport and catabolism	--	--	--	--	DJ-1/PfpI family	--	es1 protein [Haliotis discus discus]
TR50007_c0_g1	--	--	--	--	--	--	Phosphotransferase enzyme family	--	PREDICTED: uncharacterized protein LOC101858499 [Aplysia californica]
TR54579_c0_g2	--	--	--	--	--	--	SERTA motif	--	PREDICTED: uncharacterized protein LOC105325779 [Crassostrea gigas]
TR19974_c0_g1	[M]	Cell wall/membrane/envelope biogenesis	--	--	--	--	Fasciclin domain	Fasciclin-1 (Precursor) GN=FAS1 OS=Schistocerca americana (American grasshopper) PE=1 SV=1	PREDICTED: periostin-like isoform X2 [Crassostrea gigas]
TR47104_c0_g1	--	--	--	--	--	--	--	110 kDa antigen (Fragment) OS=Plasmodium knowlesi PE=2 SV=1	hypothetical protein LOTGIDRAFT_162902 [Lottia gigantea]
TR28603_c0_g1	--	--	--	--	--	--	--	--	PREDICTED: E3 ubiquitin-protein ligase TRIM56-like isoform X5 [Crassostrea gigas]
TR31435_c0_g2	--	--	--	--	--	--	--	--	Rotatin [Crassostrea gigas]
TR17609_c0_g1	--	--	--	--	--	--	C1q domain	--	PREDICTED: complement C1q tumor necrosis factor-related protein 4-like [Crassostrea gigas]
TR38226_c0_g1	--	--	--	--	--	--	--	--	PREDICTED: poly [ADP-ribose] polymerase 14-like [Crassostrea gigas]
TR12466_c0_g1	--	--	Molecular Function: nucleotide binding (GO:0000166);; Molecular Function: RNA binding (GO:0003723);; Molecular Function: metal ion binding (GO:0046872);;	K12872|0.0|tgu:100231940|RNA binding motif protein 22	[R]	General function prediction only	RNA recognition motif. (a.k.a. RRM, RBD, or RNP domain);; Torus domain	Pre-mRNA-splicing factor PFL2310w GN=PFL2310w OS=Plasmodium falciparum (isolate 3D7) PE=3 SV=1	PREDICTED: pre-mRNA-splicing factor RBM22-like [Crassostrea gigas]
TR2270_c0_g1	--	--	--	--	--	--	Acetyltransferase (GNAT) family;; Acetyltransferase (GNAT) domain;; Acetyltransferase (GNAT) domain	--	PREDICTED: uncharacterized protein LOC105347091 isoform X1 [Crassostrea gigas]
TR41877_c3_g1	--	--	Molecular Function: binding (GO:0005488);;	--	--	--	--	--	hypothetical protein CGI_10005452 [Crassostrea gigas]
TR41259_c0_g1	--	--	--	--	--	--	--	Probable Rho GTPase-activating protein CG5521 GN=CG5521 OS=Drosophila melanogaster (Fruit fly) PE=1 SV=2	PREDICTED: ral GTPase-activating protein subunit alpha-1-like isoform X5 [Crassostrea gigas]
TR26874_c0_g1	--	--	Biological Process: transport (GO:0006810);; Cellular Component: membrane (GO:0016020);;	K13354|1e-116|bfo:BRAFLDRAFT_125172|hypothetical protein	[C]	Energy production and conversion	Mitochondrial carrier protein	Mitochondrial substrate carrier family protein Q GN=mcfQ OS=Dictyostelium discoideum (Slime mold) PE=2 SV=1	PREDICTED: peroxisomal membrane protein PMP34-like [Crassostrea gigas]
TR1905_c0_g1	--	--	--	--	--	--	--	--	PREDICTED: cysteine-rich venom protein VAR11-like isoform X2 [Crassostrea gigas]
TR38760_c1_g1	--	--	--	--	--	--	Domain of unknown function (DUF4456);; Domain of unknown function (DUF4455)	Myosin-2 heavy chain GN=mhcA OS=Dictyostelium discoideum (Slime mold) PE=1 SV=3	hypothetical protein CGI_10016472 [Crassostrea gigas]
TR35962_c9_g22	[J]	Translation, ribosomal structure and biogenesis	Cellular Component: ribosome (GO:0005840);; Biological Process: ribosome biogenesis (GO:0042254);;	K02896|1e-48|xla:379128|rsl24d1, MGC53444, rlp24, rpl24, rpl24l, rvas3	[J]	Translation, ribosomal structure and biogenesis	--	Probable ribosome biogenesis protein RLP24 GN=RpL24-like OS=Drosophila melanogaster (Fruit fly) PE=1 SV=1	PREDICTED: probable ribosome biogenesis protein RLP24 [Crassostrea gigas]
TR23424_c1_g3	--	--	--	--	[T]	Signal transduction mechanisms	EGF-like domain;; Calcium-binding EGF domain;; Human growth factor-like EGF;; EGF-like domain;; EGF domain	Fibropellin-3 (Precursor) GN=EGF3 OS=Strongylocentrotus purpuratus (Purple sea urchin) PE=1 SV=1	predicted protein [Nematostella vectensis]
TR5312_c0_g1	--	--	--	--	--	--	--	--	PREDICTED: uncharacterized protein LOC105342521 [Crassostrea gigas]
TR55799_c0_g1	--	--	Molecular Function: metal ion binding (GO:0046872);;	--	[P]	Inorganic ion transport and metabolism	Metallothionein	Metallothionein OS=Crassostrea virginica (Eastern oyster) PE=1 SV=3	metallothionein [Corbicula fluminea]
TR7478_c0_g1	[H]	Coenzyme transport and metabolism	Biological Process: biosynthetic process (GO:0009058);; Molecular Function: transferase activity (GO:0016740);; Molecular Function: pyridoxal phosphate binding (GO:0030170);;	K00654|0.0|tgu:100217964|similar to serine palmitoyltransferase subunit 1	[O]	Posttranslational modification, protein turnover, chaperones	Aminotransferase class I and II	Serine palmitoyltransferase 1 GN=sptl-1 OS=Caenorhabditis elegans PE=3 SV=1	PREDICTED: serine palmitoyltransferase 1-like [Crassostrea gigas]
TR55328_c0_g1	[O]	Posttranslational modification, protein turnover, chaperones	Molecular Function: ATP-dependent peptidase activity (GO:0004176);; Molecular Function: serine-type endopeptidase activity (GO:0004252);; Molecular Function: ATP binding (GO:0005524);; Cellular Component: peroxisomal matrix (GO:0005782);; Biological Process: protein quality control by the ubiquitin-proteasome system (GO:0006515);; Biological Process: protein processing (GO:0016485);; Biological P…	K01338|0.0|bfo:BRAFLDRAFT_67608|hypothetical protein	[O]	Posttranslational modification, protein turnover, chaperones	Lon protease (S16) C-terminal proteolytic domain;; ATP-dependent protease La (LON) substrate-binding domain;; ATPase family associated with various cellular activities (AAA);; AAA domain (dynein-related subfamily);; Subunit ChlI of Mg-chelatase;; AAA domain (Cdc48 subfamily)	Lon protease homolog 2, peroxisomal {ECO:0000255|HAMAP-Rule:MF_03121} GN=CBG23035 OS=Caenorhabditis briggsae PE=3 SV=2	PREDICTED: lon protease homolog 2, peroxisomal-like [Crassostrea gigas]
TR51774_c0_g1	--	--	--	--	[L]	Replication, recombination and repair	hAT family C-terminal dimerisation region;; Protein of unknown function (DUF 659)	Transposable element Hobo transposase GN=T OS=Drosophila melanogaster (Fruit fly) PE=3 SV=1	PREDICTED: zinc finger BED domain-containing protein 1-like [Amphimedon queenslandica]
TR6892_c0_g1	--	--	--	--	--	--	--	--	hypothetical protein CAPTEDRAFT_210535 [Capitella teleta]
TR2760_c0_g1	--	--	--	--	--	--	--	--	PREDICTED: uncharacterized protein LOC105334476 [Crassostrea gigas]
TR7010_c0_g1	--	--	--	--	--	--	--	--	hypothetical protein CGI_10026737 [Crassostrea gigas]
TR9065_c7_g1	--	--	--	--	[T]	Signal transduction mechanisms	Low-density lipoprotein receptor repeat class B;; HYR domain;; Coagulation Factor Xa inhibitory site;; SMP-30/Gluconolaconase/LRE-like region	Low-density lipoprotein receptor-related protein (Precursor) GN=lrp-1 OS=Caenorhabditis elegans PE=1 SV=1	PREDICTED: uncharacterized protein LOC101861747 [Aplysia californica]
TR16602_c0_g1	--	--	--	--	--	--	Zinc finger, C3HC4 type (RING finger);; Zinc finger, C3HC4 type (RING finger);; Zinc finger, C3HC4 type (RING finger)	--	--
TR51670_c0_g1	[E]	Amino acid transport and metabolism	Molecular Function: argininosuccinate synthase activity (GO:0004055);; Molecular Function: mRNA (nucleoside-2'-O-)-methyltransferase activity (GO:0004483);; Molecular Function: ATP binding (GO:0005524);; Biological Process: 7-methylguanosine mRNA capping (GO:0006370);; Biological Process: arginine biosynthetic process (GO:0006526);; Biological Process: mRNA methylation (GO:0080009);;	K01940|4e-49|pon:100173817|ASS1, DKFZp470I2433	[E]	Amino acid transport and metabolism	Arginosuccinate synthase;; Queuosine biosynthesis protein QueC	Argininosuccinate synthase GN=AGAP003015 OS=Anopheles gambiae (African malaria mosquito) PE=3 SV=3	Argininosuccinate synthase [Crassostrea gigas]
TR10391_c2_g1	--	--	--	--	--	--	helix-turn-helix, Psq domain	--	--
TR24675_c0_g1	[J]	Translation, ribosomal structure and biogenesis	Cellular Component: ribosome (GO:0005840);;	K02937|1e-115|isc:IscW_ISCW004030|ribosomal protein, putative	[J]	Translation, ribosomal structure and biogenesis	Ribosomal L30 N-terminal domain;; Ribosomal protein L30p/L7e	60S ribosomal protein L7 GN=rpl-7 OS=Caenorhabditis elegans PE=3 SV=1	PREDICTED: 60S ribosomal protein L7-like [Crassostrea gigas]
TR55118_c0_g3	[J]	Translation, ribosomal structure and biogenesis	Molecular Function: RNA binding (GO:0003723);; Cellular Component: nucleolus (GO:0005730);; Cellular Component: intracellular ribonucleoprotein complex (GO:0030529);; Biological Process: ribosome biogenesis (GO:0042254);;	K12845|1e-66|ame:413463|hoip	[AJ]	--	Ribosomal protein L7Ae/L30e/S12e/Gadd45 family	NHP2-like protein 1 homolog GN=M28.5 OS=Caenorhabditis elegans PE=3 SV=1	hypothetical protein HELRODRAFT_184927 [Helobdella robusta]
TR38899_c0_g1	--	--	--	K10350|5e-25|tca:659004|similar to CG12084-PA	[R]	General function prediction only	Leucine Rich Repeat	Protein zer-1 homolog GN=CG12084 OS=Drosophila melanogaster (Fruit fly) PE=2 SV=2	PREDICTED: protein zer-1 homolog [Crassostrea gigas]
TR30412_c0_g1	[B]	Chromatin structure and dynamics	Cellular Component: nucleosome (GO:0000786);; Molecular Function: DNA binding (GO:0003677);; Cellular Component: nucleus (GO:0005634);; Molecular Function: protein heterodimerization activity (GO:0046982);;	K11251|6e-80|ame:552322|similar to CG31618-PA	[B]	Chromatin structure and dynamics	C-terminus of histone H2A;; Core histone H2A/H2B/H3/H4;; Histone-like transcription factor (CBF/NF-Y) and archaeal histone	Histone H2A OS=Sipunculus nudus (Marine worm) PE=1 SV=2	PREDICTED: histone H2A-like [Crassostrea gigas]
TR28077_c0_g1	--	--	--	--	[K]	Transcription	Basic region leucine zipper	Cell death specification protein 2 GN=ces-2 OS=Caenorhabditis elegans PE=1 SV=1	PREDICTED: uncharacterized protein LOC105323139 [Crassostrea gigas]
TR44870_c0_g1	--	--	Molecular Function: carbohydrate binding (GO:0030246);;	--	--	--	--	G8 domain-containing protein DDB_G0286311 (Precursor) GN=DDB_G0286311 OS=Dictyostelium discoideum (Slime mold) PE=3 SV=1	vitelline envelope zona pellucida domain 14, partial [Haliotis walallensis]
TR57396_c7_g3	[L]	Replication, recombination and repair	--	--	[R]	General function prediction only	Reverse transcriptase (RNA-dependent DNA polymerase);; Integrase core domain	Endonuclease GN=pol OS=Drosophila melanogaster (Fruit fly) PE=3 SV=1	PREDICTED: uncharacterized protein K02A2.6-like [Crassostrea gigas]
TR36278_c0_g1	[R]	General function prediction only	--	--	[I]	Lipid transport and metabolism	alpha/beta hydrolase fold;; Partial alpha/beta-hydrolase lipase region;; Serine aminopeptidase, S33	Lipase 3 (Precursor) GN=Lip3 OS=Drosophila melanogaster (Fruit fly) PE=2 SV=1	hypothetical protein BRAFLDRAFT_131171 [Branchiostoma floridae]
TR22201_c0_g1	--	--	Biological Process: transport (GO:0006810);; Cellular Component: membrane (GO:0016020);;	--	--	--	--	--	hypothetical protein LOTGIDRAFT_165098 [Lottia gigantea]
TR21194_c0_g1	--	--	--	--	--	--	--	--	PREDICTED: interaptin-like isoform X3 [Crassostrea gigas]
TR45139_c0_g1	--	--	--	--	--	--	--	--	hypothetical protein LOTGIDRAFT_164712 [Lottia gigantea]
TR20828_c0_g1	--	--	Molecular Function: ion channel activity (GO:0005216);; Biological Process: ion transport (GO:0006811);; Biological Process: cellular process (GO:0044763);;	--	--	--	--	--	PREDICTED: inositol 1,4,5-trisphosphate receptor-like protein A isoform X7 [Crassostrea gigas]
TR51787_c1_g1	--	--	--	--	[T]	Signal transduction mechanisms	--	Fibropellin-1 (Precursor) GN=EGF1 OS=Strongylocentrotus purpuratus (Purple sea urchin) PE=1 SV=2	PREDICTED: uncharacterized protein LOC576169 [Strongylocentrotus purpuratus]
TR41197_c0_g1	[K]	Transcription	Molecular Function: binding (GO:0005488);;	K03000|3e-40|isc:IscW_ISCW020585|DNA-directed RNA polymerase I, putative	[K]	Transcription	Transcription factor S-II (TFIIS)	--	PREDICTED: DNA-directed RNA polymerase I subunit RPA12-like [Crassostrea gigas]
TR21364_c3_g2	--	--	--	--	[T]	Signal transduction mechanisms	EGF-like domain;; Calcium-binding EGF domain;; Human growth factor-like EGF;; EGF-like domain	Fibropellin-1 (Precursor) GN=EGF1 OS=Strongylocentrotus purpuratus (Purple sea urchin) PE=1 SV=2	predicted protein [Nematostella vectensis]
TR24990_c0_g1	--	--	--	--	--	--	--	--	PREDICTED: metal transporter CNNM4-like [Crassostrea gigas]
TR41155_c0_g1	[R]	General function prediction only	--	K06975|2e-24|bfo:BRAFLDRAFT_76741|hypothetical protein	--	--	GCN5-related N-acetyl-transferase	--	PREDICTED: uncharacterized protein LOC101856878 [Aplysia californica]
TR5762_c0_g1	[H]	Coenzyme transport and metabolism	Molecular Function: ferrochelatase activity (GO:0004325);; Biological Process: heme biosynthetic process (GO:0006783);;	K01772|1e-178|xtr:100496154|ferrochelatase, mitochondrial-like	[H]	Coenzyme transport and metabolism	Ferrochelatase	Ferrochelatase, mitochondrial (Precursor) GN=FeCh OS=Drosophila melanogaster (Fruit fly) PE=2 SV=1	PREDICTED: ferrochelatase, mitochondrial-like [Crassostrea gigas]
TR26609_c7_g1	--	--	--	--	--	--	Mab-21 protein	--	hypothetical protein CGI_10019097 [Crassostrea gigas]
TR3025_c0_g1	[R]	General function prediction only	--	--	[Z]	Cytoskeleton	Domain of unknown function (DUF1899);; Type of WD40 repeat;; WD domain, G-beta repeat	Coronin-like protein cor-1 GN=cor-1 OS=Caenorhabditis elegans PE=3 SV=2	PREDICTED: coronin-1C-like isoform X2 [Aplysia californica]
TR25888_c3_g2	--	--	--	--	--	--	MAM domain, meprin/A5/mu;; Thrombospondin type 1 domain	MAM and LDL-receptor class A domain-containing protein 1 (Fragment) OS=Acropora millepora (Staghorn coral) PE=1 SV=1	PREDICTED: uncharacterized protein LOC100187228 [Ciona intestinalis]
TR55225_c0_g1	--	--	--	--	--	--	Cystatin domain	--	--
TR10996_c0_g1	--	--	--	--	--	--	--	--	hypothetical protein BRAFLDRAFT_110010 [Branchiostoma floridae]
TR50137_c0_g1	--	--	--	--	[Y]	Nuclear structure	--	Myb-like protein X GN=mybX OS=Dictyostelium discoideum (Slime mold) PE=3 SV=1	PREDICTED: uncharacterized protein LOC105335949 [Crassostrea gigas]
TR34379_c0_g1	--	--	--	--	--	--	TMEM192 family	--	hypothetical protein LOTGIDRAFT_104833, partial [Lottia gigantea]
TR24752_c0_g1	--	--	--	--	--	--	Domain of unknown function (DUF4371)	--	PREDICTED: zinc finger protein 862-like [Saccoglossus kowalevskii]
TR17521_c0_g1	--	--	--	--	[G]	Carbohydrate transport and metabolism	Major Facilitator Superfamily;; Uncharacterised MFS-type transporter YbfB	--	PREDICTED: monocarboxylate transporter 14-like [Crassostrea gigas]
TR38220_c0_g5	--	--	Cellular Component: mitochondrial ribosome (GO:0005761);; Cellular Component: ribosomal subunit (GO:0044391);;	--	--	--	Mitochondrial ribosome subunit S24	28S ribosomal protein S24, mitochondrial (Precursor) GN=mRpS24 OS=Drosophila melanogaster (Fruit fly) PE=3 SV=1	28S ribosomal protein S24, putative [Ixodes scapularis]
TR26383_c0_g1	--	--	Molecular Function: hydrolase activity, acting on glycosyl bonds (GO:0016798);;	K12316|3e-10|phu:Phum_PHUM022260|alpha glucosidase, putative (EC:3.2.1.3)	--	--	Trefoil (P-type) domain	--	PREDICTED: lysosomal alpha-glucosidase-like [Metaseiulus occidentalis]
TR11944_c0_g1	--	--	--	--	--	--	--	--	PREDICTED: Werner syndrome ATP-dependent helicase-like [Crassostrea gigas]
TR40748_c0_g1	--	--	Biological Process: cell morphogenesis (GO:0000902);; Molecular Function: GTPase activator activity (GO:0005096);; Molecular Function: GTP binding (GO:0005525);; Biological Process: positive regulation of GTPase activity (GO:0043547);;	--	[O]	Posttranslational modification, protein turnover, chaperones	Tubulin binding cofactor C	--	retinitis pigmentosa 2-like protein [Ruditapes philippinarum]
TR12518_c0_g1	--	--	--	--	--	--	--	--	PREDICTED: uncharacterized protein LOC105440160 [Strongylocentrotus purpuratus]
TR43093_c0_g2	--	--	--	--	--	--	--	--	IgGFc-binding protein [Crassostrea gigas]
TR50200_c0_g1	--	--	Biological Process: metabolic process (GO:0008152);; Molecular Function: thiolester hydrolase activity (GO:0016790);; Molecular Function: palmitoyl hydrolase activity (GO:0098599);;	K01074|1e-110|bfo:BRAFLDRAFT_276374|hypothetical protein	[IO]	--	Palmitoyl protein thioesterase;; Putative serine esterase (DUF676)	Lysosomal thioesterase PPT2 homolog (Precursor) GN=Ppt2 OS=Drosophila melanogaster (Fruit fly) PE=2 SV=1	hypothetical protein BRAFLDRAFT_276374 [Branchiostoma floridae]
TR11299_c0_g1	[S]	Function unknown	Molecular Function: structural molecule activity (GO:0005198);; Cellular Component: cytosol (GO:0005829);; Biological Process: cell adhesion (GO:0007155);; Cellular Component: flotillin complex (GO:0016600);; Biological Process: melanotic encapsulation of foreign target (GO:0035011);;	K07192|0.0|bfo:BRAFLDRAFT_264586|hypothetical protein	[UZ]	--	SPFH domain / Band 7 family;; Flotillin;; SPFH domain / Band 7 family;; Flotillin	Flotillin-2 GN=Flo-2 OS=Drosophila melanogaster (Fruit fly) PE=2 SV=3	PREDICTED: flotillin-2-like [Aplysia californica]
TR35309_c0_g2	--	--	--	--	[S]	Function unknown	--	CWF19-like protein 2 homolog GN=CG9213 OS=Drosophila melanogaster (Fruit fly) PE=1 SV=2	PREDICTED: CWF19-like protein 2 [Crassostrea gigas]
TR6873_c0_g1	--	--	--	--	--	--	--	--	PREDICTED: tripartite motif-containing protein 2-like [Crassostrea gigas]
TR33945_c1_g1	--	--	Molecular Function: transferase activity (GO:0016740);;	K14464|2e-19|isc:IscW_ISCW004236|fucosyltransferase, putative (EC:2.4.1.65)	[GE]	--	Fucosyltransferase, N-terminal	Alpha-(1,3)-fucosyltransferase C GN=FucTC OS=Drosophila melanogaster (Fruit fly) PE=2 SV=4	PREDICTED: alpha-(1,3)-fucosyltransferase 9-like [Crassostrea gigas]
TR15206_c0_g1	[P]	Inorganic ion transport and metabolism	--	--	[P]	Inorganic ion transport and metabolism	--	Uncharacterized histidine-rich protein DDB_G0274557 (Precursor) GN=DDB_G0274557 OS=Dictyostelium discoideum (Slime mold) PE=3 SV=1	hypothetical protein X975_14648, partial [Stegodyphus mimosarum]
TR15693_c0_g1	--	--	Cellular Component: nucleus (GO:0005634);; Biological Process: regulation of transcription, DNA-templated (GO:0006355);; Molecular Function: sequence-specific DNA binding (GO:0043565);;	K09309|2e-48|cqu:CpipJ_CPIJ019260|nk homeobox protein	[R]	General function prediction only	Homeobox domain	Homeobox protein slou GN=slou OS=Drosophila melanogaster (Fruit fly) PE=2 SV=1	PREDICTED: homeobox protein slou-like [Crassostrea gigas]
TR18099_c0_g1	--	--	--	--	--	--	--	--	hypothetical protein BRAFLDRAFT_78436 [Branchiostoma floridae]
TR24885_c0_g1	--	--	--	--	--	--	--	--	PREDICTED: syntaxin-binding protein 4-like isoform X2 [Crassostrea gigas]
TR40248_c1_g1	[R]	General function prediction only	Cellular Component: nucleus (GO:0005634);; Biological Process: mRNA processing (GO:0006397);;	K12869|0.0|gga:421243|CRNKL1	[D]	Cell cycle control, cell division, chromosome partitioning	HAT (Half-A-TPR) repeat;; Suppressor of forked protein (Suf);; Tetratricopeptide repeat;; Tetratricopeptide repeat;; Tetratricopeptide repeat;; BSD domain	Protein crooked neck GN=crn OS=Drosophila melanogaster (Fruit fly) PE=2 SV=2	PREDICTED: crooked neck-like protein 1 [Crassostrea gigas]
TR4075_c0_g1	--	--	--	--	[R]	General function prediction only	--	--	hypothetical protein BRAFLDRAFT_84231 [Branchiostoma floridae]
TR10203_c0_g1	--	--	--	--	[T]	Signal transduction mechanisms	Vacuolar membrane-associated protein Iml1;; Domain found in Dishevelled, Egl-10, and Pleckstrin (DEP)	DEP domain-containing protein DDB_G0279099 GN=DDB_G0279099 OS=Dictyostelium discoideum (Slime mold) PE=3 SV=1	PREDICTED: DEP domain-containing protein 5-like isoform X3 [Crassostrea gigas]
TR48725_c2_g1	--	--	--	K10366|0.0|spu:373242|dlp, Dp98	[NTZ]	--	Spectrin repeat;; EF-hand;; EF hand;; Zinc finger, ZZ type	Dystrophin, isoform B GN=Dys OS=Drosophila melanogaster (Fruit fly) PE=1 SV=3	PREDICTED: dystrophin-like isoform X3 [Crassostrea gigas]
TR49754_c0_g1	[L]	Replication, recombination and repair	--	--	--	--	Sperm tail;; Sperm tail C-terminal domain	Calponin homology domain-containing protein DDB_G0272472 GN=DDB_G0272472 OS=Dictyostelium discoideum (Slime mold) PE=3 SV=1	PREDICTED: coiled-coil domain-containing protein 65-like isoform X6 [Aplysia californica]
TR2104_c0_g2	--	--	--	--	[O]	Posttranslational modification, protein turnover, chaperones	Zinc finger, C3HC4 type (RING finger);; Zinc finger, C3HC4 type (RING finger);; Ring finger domain;; RING-type zinc-finger	--	hypothetical protein LOTGIDRAFT_237082 [Lottia gigantea]
TR49149_c0_g1	--	--	--	--	--	--	--	--	PREDICTED: restin homolog isoform X4 [Crassostrea gigas]
TR5948_c0_g1	--	--	--	--	--	--	DDE superfamily endonuclease;; Helix-turn-helix of DDE superfamily endonuclease;; THAP domain	--	PREDICTED: uncharacterized protein LOC100373789 [Saccoglossus kowalevskii]
TR43719_c0_g1	[E]	Amino acid transport and metabolism	Molecular Function: serine-pyruvate transaminase activity (GO:0004760);; Biological Process: metabolic process (GO:0008152);; Molecular Function: alanine-glyoxylate transaminase activity (GO:0008453);; Molecular Function: pyridoxal phosphate binding (GO:0030170);;	K00830|1e-168|tad:TRIADDRAFT_26208|hypothetical protein	[R]	General function prediction only	Aminotransferase class-V;; Cys/Met metabolism PLP-dependent enzyme;; Aminotransferase class I and II	Serine--pyruvate aminotransferase GN=agxt OS=Dictyostelium discoideum (Slime mold) PE=3 SV=1	PREDICTED: serine--pyruvate aminotransferase-like [Crassostrea gigas]
TR27170_c0_g1	[E]	Amino acid transport and metabolism	Biological Process: metabolic process (GO:0008152);; Molecular Function: hydrolase activity, acting on carbon-nitrogen (but not peptide) bonds, in linear amidines (GO:0016813);; Molecular Function: metal ion binding (GO:0046872);;	K01480|1e-169|cin:100177356|similar to putative agmatinase	[E]	Amino acid transport and metabolism	Arginase family	--	PREDICTED: agmatinase, mitochondrial-like [Crassostrea gigas]
TR52110_c0_g1	--	--	--	--	--	--	Protein-tyrosine phosphatase	--	hypothetical protein LOTGIDRAFT_118054 [Lottia gigantea]
TR6715_c0_g1	[M]	Cell wall/membrane/envelope biogenesis	Molecular Function: catalytic activity (GO:0003824);; Biological Process: transport (GO:0006810);; Cellular Component: membrane (GO:0016020);; Cellular Component: cell junction (GO:0030054);;	--	--	--	DegT/DnrJ/EryC1/StrS aminotransferase family	--	PREDICTED: uncharacterized protein LOC105321239 [Crassostrea gigas]
TR11498_c0_g1	--	--	Molecular Function: microtubule motor activity (GO:0003777);; Molecular Function: ATP binding (GO:0005524);; Cellular Component: kinesin complex (GO:0005871);; Cellular Component: microtubule (GO:0005874);; Biological Process: intracellular protein transport (GO:0006886);; Biological Process: microtubule-based movement (GO:0007018);; Molecular Function: microtubule binding (GO:0008017);; Biologic…	--	[Z]	Cytoskeleton	Kinesin motor domain	Myb-like protein X GN=mybX OS=Dictyostelium discoideum (Slime mold) PE=3 SV=1	PREDICTED: kinesin-like protein KIF21A [Crassostrea gigas]
TR15936_c0_g2	[V]	Defense mechanisms	Molecular Function: ATP binding (GO:0005524);; Biological Process: metabolic process (GO:0008152);; Cellular Component: integral component of membrane (GO:0016021);; Molecular Function: ATPase activity, coupled to transmembrane movement of substances (GO:0042626);; Biological Process: transmembrane transport (GO:0055085);;	K05667|2e-59|xtr:100135090|abcc3, abc31, cmoat2, mlp2, moat-d, mrp3	[Q]	Secondary metabolites biosynthesis, transport and catabolism	ABC transporter transmembrane region	ABC transporter C family member 8 GN=abcC8 OS=Dictyostelium discoideum (Slime mold) PE=3 SV=1	ATP-binding cassette sub-family C member 1 [Dreissena polymorpha]
TR8583_c0_g1	--	--	--	--	[TV]	--	Lectin C-type domain	Perlucin OS=Haliotis laevigata (Abalone) PE=1 SV=3	PREDICTED: perlucin-like protein [Crassostrea gigas]
TR23706_c0_g1	[K]	Transcription	Molecular Function: binding (GO:0005488);;	K09378|0.0|api:100161293|similar to Zinc finger homeobox protein 3 (Zinc finger homeodomain protein 3) (ZFH-3) (Alpha-fetoprotein enhancer-binding protein) (AT motif-binding factor) (AT-binding transcription factor 1)	[R]	General function prediction only	Homeobox domain;; C2H2-type zinc finger;; Zinc finger, C2H2 type;; Homeobox KN domain	Zinc finger protein 2 GN=zfh2 OS=Drosophila melanogaster (Fruit fly) PE=1 SV=2	PREDICTED: zinc finger homeobox protein 4-like [Crassostrea gigas]
TR38603_c0_g1	--	--	--	--	--	--	GDSL-like Lipase/Acylhydrolase family;; GDSL-like Lipase/Acylhydrolase	--	PREDICTED: uncharacterized protein LOC105322140 isoform X1 [Crassostrea gigas]
TR16466_c0_g1	[OJ]	--	Biological Process: receptor-mediated endocytosis (GO:0006898);; Biological Process: gonad development (GO:0008406);; Biological Process: embryo development ending in birth or egg hatching (GO:0009792);; Biological Process: oviposition (GO:0018991);; Biological Process: negative regulation of vulval development (GO:0040027);; Molecular Function: organic cyclic compound binding (GO:0097159);; Mole…	K11090|8e-87|mdo:100017691|similar to Sjogren syndrome antigen B (autoantigen La)	[A]	RNA processing and modification	RNA binding motif;; La domain;; RNA recognition motif. (a.k.a. RRM, RBD, or RNP domain)	La protein homolog OS=Aedes albopictus (Asian tiger mosquito) PE=1 SV=1	PREDICTED: lupus La protein-like [Aplysia californica]
TR4034_c0_g1	--	--	--	--	--	--	--	--	PREDICTED: interference hedgehog-like [Crassostrea gigas]
TR11392_c0_g1	--	--	--	--	--	--	Galactose-3-O-sulfotransferase	--	PREDICTED: galactose-3-O-sulfotransferase 2-like [Crassostrea gigas]
TR33747_c0_g1	--	--	--	--	[R]	General function prediction only	Reverse transcriptase (RNA-dependent DNA polymerase)	Probable RNA-directed DNA polymerase from transposon BS OS=Drosophila melanogaster (Fruit fly) PE=2 SV=1	PREDICTED: RNA-directed DNA polymerase from mobile element jockey-like [Strongylocentrotus purpuratus]
TR25013_c0_g1	--	--	--	--	--	--	C1q domain	--	putative C1q domain containing protein MgC1q66 [Mytilus galloprovincialis]
TR57601_c1_g1	--	--	--	--	--	--	--	--	PREDICTED: E3 ubiquitin-protein ligase RNF213-like [Crassostrea gigas]
TR38455_c0_g2	--	--	--	K00476|3e-07|cbr:CBG07728|Hypothetical protein CBG07728	[O]	Posttranslational modification, protein turnover, chaperones	Chitin synthesis regulation, resistance to Congo red;; CTF/NF-I family transcription modulation region	--	hypothetical protein LOTGIDRAFT_238206 [Lottia gigantea]
TR44457_c0_g1	--	--	Biological Process: metabolic process (GO:0008152);;	--	--	--	--	Putative eggshell protein (Fragment) OS=Schistosoma mansoni (Blood fluke) PE=2 SV=1	PREDICTED: zonadhesin-like [Crassostrea gigas]
TR53043_c1_g1	[T]	Signal transduction mechanisms	Molecular Function: nucleotide binding (GO:0000166);; Molecular Function: adenylate cyclase activity (GO:0004016);; Biological Process: cAMP biosynthetic process (GO:0006171);; Cellular Component: integral component of membrane (GO:0016021);; Biological Process: intracellular signal transduction (GO:0035556);;	K08041|3e-55|tca:661438|similar to CG9533-PA	[C]	Energy production and conversion	Adenylate and Guanylate cyclase catalytic domain	Ca(2+)/calmodulin-responsive adenylate cyclase GN=rut OS=Drosophila melanogaster (Fruit fly) PE=1 SV=2	Ca(2+)/calmodulin-responsive adenylate cyclase [Crassostrea gigas]
TR58100_c1_g1	--	--	Molecular Function: phosphatidylinositol phospholipase C activity (GO:0004435);; Molecular Function: signal transducer activity (GO:0004871);; Molecular Function: phospholipid binding (GO:0005543);; Cellular Component: cell cortex (GO:0005938);; Biological Process: lipid catabolic process (GO:0016042);; Biological Process: cortical protein anchoring (GO:0032065);; Biological Process: pronuclear m…	--	[T]	Signal transduction mechanisms	Pleckstrin homology domain	--	PREDICTED: inactive phospholipase C-like protein 2 [Crassostrea gigas]
TR35338_c0_g1	--	--	--	K13516|5e-34|api:100160900|similar to leukocyte receptor cluster (lrc) member 4 protein	[S]	Function unknown	--	Lysophospholipid acyltransferase 7 {ECO:0000250|UniProtKB:Q96N66} OS=Caenorhabditis elegans PE=1 SV=2	Lysophospholipid acyltransferase 7, partial [Stegodyphus mimosarum]
TR30176_c0_g1	--	--	Biological Process: signal transduction (GO:0007165);; Molecular Function: hedgehog receptor activity (GO:0008158);; Cellular Component: integral component of membrane (GO:0016021);;	--	[R]	General function prediction only	Patched family	Protein patched homolog 1 GN=ptc-1 OS=Caenorhabditis elegans PE=1 SV=2	PREDICTED: protein patched homolog 1-like [Crassostrea gigas]
TR20815_c0_g2	[RTKL]	--	Molecular Function: protein kinase activity (GO:0004672);; Molecular Function: binding (GO:0005488);; Biological Process: cellular process (GO:0009987);;	K05102|1e-20|ssc:100519989|EPHA1	[T]	Signal transduction mechanisms	Protein tyrosine kinase;; Protein kinase domain	Fibroblast growth factor receptor 2 (Precursor) GN=FGFR2 OS=Dugesia japonica (Planarian) PE=2 SV=1	PREDICTED: uncharacterized protein LOC105348641 [Crassostrea gigas]
TR30195_c0_g1	--	--	--	--	[W]	Extracellular structures	Collagen triple helix repeat (20 copies)	Collagen alpha chain CG42342 GN=CG42342 OS=Drosophila melanogaster (Fruit fly) PE=2 SV=1	PREDICTED: collagen alpha-5(IV) chain-like isoform X9 [Crassostrea gigas]
TR27302_c0_g1	--	--	--	--	--	--	Baculovirus F protein	--	hypothetical protein CGI_10019851 [Crassostrea gigas]
TR57624_c0_g1	[J]	Translation, ribosomal structure and biogenesis	Molecular Function: structural constituent of ribosome (GO:0003735);; Biological Process: translation (GO:0006412);; Cellular Component: large ribosomal subunit (GO:0015934);;	K02872|4e-91|isc:IscW_ISCW019130|ribosomal protein L13A, putative	[J]	Translation, ribosomal structure and biogenesis	Ribosomal protein L13	60S ribosomal protein L13a GN=RpL13A OS=Drosophila melanogaster (Fruit fly) PE=1 SV=1	60S ribosomal protein L13A [Mytilus edulis]
TR57131_c1_g1	--	--	--	--	--	--	Mab-21 protein	--	PREDICTED: uncharacterized protein LOC105328718 isoform X2 [Crassostrea gigas]
TR23205_c1_g1	--	--	--	--	--	--	--	--	PREDICTED: vacuolar protein sorting-associated protein 13D-like [Aplysia californica]
TR48458_c0_g2	[N]	Cell motility	--	--	[A]	RNA processing and modification	--	Bromodomain-containing protein DDB_G0280777 GN=DDB_G0280777 OS=Dictyostelium discoideum (Slime mold) PE=3 SV=1	hypothetical protein DDB_G0267798 [Dictyostelium discoideum AX4]
TR22197_c0_g1	--	--	--	--	--	--	--	--	PREDICTED: E3 ubiquitin-protein ligase RNF213-like [Crassostrea gigas]
TR53363_c0_g1	[E]	Amino acid transport and metabolism	Biological Process: transport (GO:0044765);;	--	[E]	Amino acid transport and metabolism	Transmembrane amino acid transporter protein	G8 domain-containing protein DDB_G0286311 (Precursor) GN=DDB_G0286311 OS=Dictyostelium discoideum (Slime mold) PE=3 SV=1	hypothetical protein [Monosiga brevicollis MX1]
TR35127_c0_g1	--	--	--	--	--	--	Lectin C-type domain	Perlucin-like protein {ECO:0000303|PubMed:21643827} (Precursor) OS=Mytilus galloprovincialis (Mediterranean mussel) PE=1 SV=1	PREDICTED: perlucin-like protein [Crassostrea gigas]
TR30607_c0_g1	--	--	--	--	--	--	AIG1 family	--	--
TR37876_c0_g1	--	--	--	--	--	--	--	--	hypothetical protein CGI_10001776 [Crassostrea gigas]
TR1705_c0_g1	--	--	--	K04988|6e-38|xtr:100486136|pkd1l2	[PT]	--	--	Polycystic kidney disease 1-related protein {ECO:0000303|PubMed:23765379} (Precursor; Fragment) OS=Acropora millepora (Staghorn coral) PE=1 SV=1	Polycystic kidney disease and receptor for egg jelly-related protein [Crassostrea gigas]
TR52771_c0_g1	[F]	Nucleotide transport and metabolism	Molecular Function: nucleoside diphosphate kinase activity (GO:0004550);; Molecular Function: ATP binding (GO:0005524);; Biological Process: nucleoside diphosphate phosphorylation (GO:0006165);; Biological Process: GTP biosynthetic process (GO:0006183);; Biological Process: UTP biosynthetic process (GO:0006228);; Biological Process: CTP biosynthetic process (GO:0006241);;	K00940|1e-76|tca:655847|similar to CG2210-PA	[F]	Nucleotide transport and metabolism	Nucleoside diphosphate kinase	Nucleoside diphosphate kinase (Fragment) OS=Drosophila yakuba (Fruit fly) PE=2 SV=1	nucleoside diphosphate kinase B [Haliotis discus discus]
TR31172_c1_g1	--	--	--	--	[T]	Signal transduction mechanisms	Regulator of G protein signaling domain	Regulator of G-protein signaling rgs-5 GN=rgs-5 OS=Caenorhabditis elegans PE=3 SV=4	PREDICTED: A-kinase anchor protein 10, mitochondrial-like [Crassostrea gigas]
TR2218_c0_g1	--	--	Biological Process: protein glycosylation (GO:0006486);; Molecular Function: fucosyltransferase activity (GO:0008417);; Cellular Component: integral component of membrane (GO:0016021);; Cellular Component: Golgi cisterna membrane (GO:0032580);; Biological Process: fucosylation (GO:0036065);;	K00753|1e-143|phu:Phum_PHUM491860|glycoprotein 3-alpha-L-fucosyltransferase A, putative (EC:2.4.1.214)	[GE]	--	Glycosyltransferase family 10 (fucosyltransferase) C-term;; Fucosyltransferase, N-terminal	Glycoprotein 3-alpha-L-fucosyltransferase A GN=FucTA OS=Drosophila melanogaster (Fruit fly) PE=1 SV=2	PREDICTED: glycoprotein 3-alpha-L-fucosyltransferase A-like [Crassostrea gigas]
TR22541_c0_g1	[P]	Inorganic ion transport and metabolism	--	--	--	--	--	Histidine-rich glycoprotein (Precursor) OS=Plasmodium lophurae PE=4 SV=1	osmiophilic body protein [Plasmodium reichenowi]
TR48806_c3_g5	[F]	Nucleotide transport and metabolism	Cellular Component: cytoplasm (GO:0005737);; Biological Process: nucleoside triphosphate metabolic process (GO:0009141);; Biological Process: nucleotide biosynthetic process (GO:0009165);; Molecular Function: phosphotransferase activity, phosphate group as acceptor (GO:0016776);; Molecular Function: nucleotide kinase activity (GO:0019201);; Biological Process: nucleotide phosphorylation (GO:00469…	K00939|1e-86|ecb:100053274|hypothetical LOC100053274	[F]	Nucleotide transport and metabolism	Adenylate kinase;; AAA domain;; AAA domain;; AAA domain;; AAA domain;; Cytidylate kinase;; Thymidylate kinase	Adenylate kinase isoenzyme 1 {ECO:0000255|HAMAP-Rule:MF_03171} GN=F38B2.4 OS=Caenorhabditis elegans PE=2 SV=1	PREDICTED: adenylate kinase isoenzyme 5-like isoform X2 [Crassostrea gigas]
TR40036_c0_g1	--	--	Molecular Function: binding (GO:0005488);;	--	[U]	Intracellular trafficking, secretion, and vesicular transport	Vacuolar sorting protein 9 (VPS9) domain;; A20-like zinc finger	Receptor-mediated endocytosis protein 6 GN=rme-6 OS=Caenorhabditis elegans PE=1 SV=2	hypothetical protein LOTGIDRAFT_140110 [Lottia gigantea]
TR39545_c0_g1	--	--	--	--	--	--	--	--	hypothetical protein CGI_10025732 [Crassostrea gigas]
TR13054_c0_g1	[GEPR]	--	Cellular Component: integral component of membrane (GO:0016021);; Molecular Function: transmembrane transporter activity (GO:0022857);; Biological Process: transmembrane transport (GO:0055085);;	--	[R]	General function prediction only	Sugar (and other) transporter;; Major Facilitator Superfamily	Putative transporter ZK637.1 GN=ZK637.1 OS=Caenorhabditis elegans PE=3 SV=5	PREDICTED: synaptic vesicle 2-related protein-like [Crassostrea gigas]
TR53764_c0_g1	--	--	--	--	--	--	Domain of unknown function (DUF4371);; hAT family C-terminal dimerisation region	--	PREDICTED: 52 kDa repressor of the inhibitor of the protein kinase-like [Crassostrea gigas]
TR18813_c0_g1	--	--	--	--	[R]	General function prediction only	Ankyrin repeats (3 copies);; Ankyrin repeats (many copies);; SOCS box;; Ankyrin repeat;; Ankyrin repeat;; Ankyrin repeats (many copies)	Death-associated protein kinase dapk-1 GN=K12C11.4 OS=Caenorhabditis elegans PE=2 SV=2	PREDICTED: ankyrin-1-like [Crassostrea gigas]
TR29308_c0_g1	--	--	--	--	--	--	CEP76 C2 domain	--	PREDICTED: centrosomal protein of 76 kDa-like [Aplysia californica]
TR8886_c0_g1	[T]	Signal transduction mechanisms	Molecular Function: hydrolase activity (GO:0016787);;	--	--	--	Protein-tyrosine phosphatase	Tyrosine-protein phosphatase 10D (Precursor) GN=Ptp10D OS=Drosophila melanogaster (Fruit fly) PE=1 SV=4	PREDICTED: uncharacterized protein LOC105340105 [Crassostrea gigas]
TR7807_c0_g1	--	--	--	--	[D]	Cell cycle control, cell division, chromosome partitioning	--	WD repeat-containing protein 5 homolog GN=wdr5 OS=Dictyostelium discoideum (Slime mold) PE=3 SV=1	hypothetical protein CAPTEDRAFT_191423, partial [Capitella teleta]
TR4858_c0_g2	--	--	--	--	--	--	THAP domain	--	PREDICTED: uncharacterized protein LOC105324703 [Crassostrea gigas]
TR28257_c0_g1	--	--	--	--	[R]	General function prediction only	Reverse transcriptase (RNA-dependent DNA polymerase)	Probable RNA-directed DNA polymerase from transposon BS OS=Drosophila melanogaster (Fruit fly) PE=2 SV=1	PREDICTED: uncharacterized protein LOC102810040 [Saccoglossus kowalevskii]
TR45333_c1_g1	[RTKL]	--	Molecular Function: protein kinase activity (GO:0004672);; Biological Process: phosphorylation (GO:0016310);;	K05410|1e-97|isc:IscW_ISCW020049|serine/threonine protein kinase, putative (EC:2.7.11.25)	[T]	Signal transduction mechanisms	Protein kinase domain;; Protein tyrosine kinase	Inhibitor of nuclear factor kappa-B kinase subunit beta GN=ird5 OS=Drosophila melanogaster (Fruit fly) PE=1 SV=2	Serine/threonine-protein kinase TBK1, partial [Stegodyphus mimosarum]
TR50557_c0_g1	[T]	Signal transduction mechanisms	Molecular Function: protein serine/threonine phosphatase activity (GO:0004722);; Biological Process: protein dephosphorylation (GO:0006470);; Molecular Function: metal ion binding (GO:0046872);;	K01090|1e-155|nve:NEMVE_v1g167304|hypothetical protein	[T]	Signal transduction mechanisms	Protein phosphatase 2C;; Protein phosphatase 2C	Probable protein phosphatase 2C T23F11.1 GN=ppm-2 OS=Caenorhabditis elegans PE=3 SV=2	hypothetical protein LOTGIDRAFT_218852 [Lottia gigantea]
TR47516_c0_g1	[R]	General function prediction only	--	K04513|6e-41|hmg:100203745|similar to GH22067	[R]	General function prediction only	Ras family;; Ras of Complex, Roc, domain of DAPkinase	Ras-like GTP-binding protein RHO (Precursor) GN=RHO OS=Aplysia californica (California sea hare) PE=2 SV=1	PREDICTED: ras-related protein ced-10-like isoform X1 [Diaphorina citri]
TR35739_c1_g1	--	--	--	--	[S]	Function unknown	Frag1/DRAM/Sfk1 family	--	PREDICTED: DNA damage-regulated autophagy modulator protein 1-like isoform X1 [Crassostrea gigas]
TR38316_c0_g1	--	--	--	--	--	--	--	Myosin-2 heavy chain, non muscle OS=Acanthamoeba castellanii (Amoeba) PE=3 SV=1	PREDICTED: outer dense fiber protein 2-like isoform X5 [Crassostrea gigas]
TR50811_c0_g1	--	--	Cellular Component: membrane (GO:0016020);;	--	[T]	Signal transduction mechanisms	--	Fat-like cadherin-related tumor suppressor homolog (Precursor) GN=kug OS=Drosophila melanogaster (Fruit fly) PE=2 SV=3	PREDICTED: uncharacterized protein LOC105330502 [Crassostrea gigas]
TR34316_c0_g1	[F]	Nucleotide transport and metabolism	Molecular Function: oxidoreductase activity, acting on CH-OH group of donors (GO:0016614);; Molecular Function: metal ion binding (GO:0046872);; Molecular Function: iron-sulfur cluster binding (GO:0051536);;	--	[F]	Nucleotide transport and metabolism	Molybdopterin-binding domain of aldehyde dehydrogenase	Xanthine dehydrogenase GN=xdh OS=Dictyostelium discoideum (Slime mold) PE=3 SV=1	hypothetical protein LOTGIDRAFT_231915 [Lottia gigantea]
TR37500_c0_g1	--	--	--	--	[T]	Signal transduction mechanisms	Copine;; C2 domain	Nicotinic receptor-associated protein 1 OS=Caenorhabditis briggsae PE=3 SV=2	PREDICTED: copine-8-like isoform X2 [Crassostrea gigas]
TR8361_c0_g1	--	--	Molecular Function: microtubule motor activity (GO:0003777);; Molecular Function: ATP binding (GO:0005524);; Cellular Component: kinesin complex (GO:0005871);; Cellular Component: microtubule (GO:0005874);; Biological Process: microtubule-based movement (GO:0007018);; Molecular Function: microtubule binding (GO:0008017);; Biological Process: metabolic process (GO:0008152);;	K10392|2e-52|bfo:BRAFLDRAFT_234346|hypothetical protein	[Z]	Cytoskeleton	Kinesin protein	--	hypothetical protein LOTGIDRAFT_133948, partial [Lottia gigantea]
TR24528_c0_g1	--	--	Biological Process: lipid metabolic process (GO:0006629);;	K12419|1e-116|bfo:BRAFLDRAFT_99289|hypothetical protein	[I]	Lipid transport and metabolism	Fatty acid desaturase	--	hypothetical protein LOTGIDRAFT_128818 [Lottia gigantea]
TR51665_c0_g1	--	--	Cellular Component: integral component of membrane (GO:0016021);;	--	[T]	Signal transduction mechanisms	Low-density lipoprotein receptor repeat class B	Low-density lipoprotein receptor-related protein (Precursor) GN=lrp-1 OS=Caenorhabditis elegans PE=1 SV=1	hypothetical protein CAPTEDRAFT_222521 [Capitella teleta]
TR52231_c0_g1	--	--	--	--	--	--	--	--	PREDICTED: protein toll-like [Crassostrea gigas]
TR9238_c0_g1	--	--	--	--	--	--	--	Lamin-like protein {ECO:0000312|dictyBase:DDB_G0289429} OS=Dictyostelium discoideum (Slime mold) PE=1 SV=1	--
TR10547_c0_g1	--	--	Biological Process: intracellular protein transport (GO:0006886);; Biological Process: neurotransmitter secretion (GO:0007269);; Biological Process: germarium-derived egg chamber formation (GO:0007293);; Cellular Component: synaptic vesicle (GO:0008021);; Molecular Function: protein transporter activity (GO:0008565);; Biological Process: synaptic vesicle coating (GO:0016183);; Cellular Component:…	K11826|0.0|cqu:CpipJ_CPIJ003697|clathrin coat assembly protein AP50	[U]	Intracellular trafficking, secretion, and vesicular transport	Adaptor complexes medium subunit family;; Clathrin adaptor complex small chain	AP-2 complex subunit mu GN=dpy-23 OS=Caenorhabditis elegans PE=2 SV=2	hypothetical protein LOTGIDRAFT_204295 [Lottia gigantea]
TR48246_c0_g1	--	--	--	K10279|4e-23|spu:577951|hypothetical LOC577951	--	--	--	--	PREDICTED: F-box/LRR-repeat protein 13-like isoform X5 [Crassostrea gigas]
TR45832_c0_g2	--	--	Biological Process: apoptotic process (GO:0006915);; Cellular Component: integral component of membrane (GO:0016021);;	--	[R]	General function prediction only	Cleft lip and palate transmembrane protein 1 (CLPTM1)	CLPTM1-like membrane protein cnrB GN=cnrB OS=Dictyostelium discoideum (Slime mold) PE=3 SV=1	hypothetical protein LOTGIDRAFT_108820 [Lottia gigantea]
TR3048_c1_g1	--	--	--	--	--	--	Death domain	--	--
TR57469_c4_g7	--	--	--	--	--	--	--	--	PREDICTED: uncharacterized protein LOC105321563 isoform X3 [Crassostrea gigas]
TR58398_c0_g1	[T]	Signal transduction mechanisms	--	K01104|2e-26|gga:396060|PTPRA, PTPA	[T]	Signal transduction mechanisms	Protein-tyrosine phosphatase	Tyrosine-protein phosphatase Lar (Precursor) GN=Lar OS=Drosophila melanogaster (Fruit fly) PE=1 SV=2	PREDICTED: receptor-type tyrosine-protein phosphatase mu-like [Crassostrea gigas]
TR21521_c0_g1	[R]	General function prediction only	Molecular Function: oxidoreductase activity (GO:0016491);; Molecular Function: metal ion binding (GO:0046872);;	--	[QR]	--	2OG-Fe(II) oxygenase superfamily;; non-haem dioxygenase in morphine synthesis N-terminal	1-aminocyclopropane-1-carboxylate oxidase GN=aco OS=Dictyostelium mucoroides (Slime mold) PE=3 SV=1	PREDICTED: gibberellin 2-beta-dioxygenase 4-like [Crassostrea gigas]
TR56550_c0_g1	--	--	--	--	--	--	--	--	PREDICTED: uncharacterized protein LOC105343835 [Crassostrea gigas]
TR58171_c0_g1	[C]	Energy production and conversion	--	--	--	--	Nitrogenase component 1 type Oxidoreductase	--	--
TR7936_c0_g1	--	--	Molecular Function: metal ion binding (GO:0046872);;	K06058|7e-25|tgu:100219830|deltex 3-like (Drosophila)	--	--	--	Protein deltex GN=dx OS=Drosophila melanogaster (Fruit fly) PE=1 SV=2	hypothetical protein LOTGIDRAFT_129923 [Lottia gigantea]
TR26098_c0_g1	--	--	--	K10888|9e-29|aml:100467364|FANCA	--	--	Fanconi anaemia group A protein N terminus	--	hypothetical protein LOTGIDRAFT_159082 [Lottia gigantea]
TR33385_c0_g1	--	--	--	--	[T]	Signal transduction mechanisms	DOMON domain;; Eukaryotic cytochrome b561	Putative ferric-chelate reductase 1 homolog GN=CG8399 OS=Drosophila melanogaster (Fruit fly) PE=2 SV=1	PREDICTED: ferric-chelate reductase 1-like isoform X1 [Crassostrea gigas]
TR31928_c0_g5	--	--	Molecular Function: transmembrane signaling receptor activity (GO:0004888);; Biological Process: cell surface receptor signaling pathway (GO:0007166);; Cellular Component: membrane (GO:0016020);;	--	[PT]	--	--	--	G-protein coupled receptor 98 [Crassostrea gigas]
TR23903_c0_g1	[Q]	Secondary metabolites biosynthesis, transport and catabolism	Molecular Function: catalytic activity (GO:0003824);;	K01071|5e-72|dre:568096|MGC136926	--	--	Thioesterase domain;; Alpha/beta hydrolase family	--	hypothetical protein LOTGIDRAFT_184680 [Lottia gigantea]
TR16477_c0_g1	[OC]	--	--	K10758|1e-115|xtr:100158617|qsox2, qscn6l1, soxn	[D]	Cell cycle control, cell division, chromosome partitioning	Erv1 / Alr family;; Thioredoxin;; ERp29, N-terminal domain	Putative protein disulfide-isomerase DDB_G0275025 (Precursor) GN=DDB_G0275025 OS=Dictyostelium discoideum (Slime mold) PE=1 SV=1	PREDICTED: sulfhydryl oxidase 1-like [Crassostrea gigas]
TR48916_c0_g1	[O]	Posttranslational modification, protein turnover, chaperones	Molecular Function: threonine-type endopeptidase activity (GO:0004298);; Cellular Component: nucleus (GO:0005634);; Cellular Component: cytoplasm (GO:0005737);; Biological Process: ubiquitin-dependent protein catabolic process (GO:0006511);; Cellular Component: proteasome core complex, alpha-subunit complex (GO:0019773);;	K02725|1e-133|xla:735073|psma1, MGC115143	[O]	Posttranslational modification, protein turnover, chaperones	Proteasome subunit;; Proteasome subunit A N-terminal signature	Proteasome subunit alpha type-1 GN=Prosalpha6 OS=Drosophila melanogaster (Fruit fly) PE=1 SV=1	PREDICTED: proteasome subunit alpha type-1-like [Crassostrea gigas]
TR19852_c0_g1	--	--	--	--	[R]	General function prediction only	Guanylate-binding protein, N-terminal domain;; Guanylate-binding protein, C-terminal domain	Reticulocyte-binding protein 2 homolog a {ECO:0000312|EMBL:CAD52492.1} GN=PF13_0198 OS=Plasmodium falciparum (isolate 3D7) PE=3 SV=1	interferon-induced guanylate-binding protein 1-like protein [Hyriopsis cumingii]
TR52641_c0_g1	--	--	Molecular Function: methyltransferase activity (GO:0008168);; Biological Process: methylation (GO:0032259);;	K00587|2e-22|mdo:100026574|similar to Protein-S-isoprenylcysteine O-methyltransferase (Isoprenylcysteine carboxylmethyltransferase) (Prenylcysteine carboxyl methyltransferase) (pcCMT) (Prenylated protein carboxyl methyltransferase) (PPMT)	[O]	Posttranslational modification, protein turnover, chaperones	--	--	hypothetical protein LOTGIDRAFT_217923 [Lottia gigantea]
TR52030_c1_g1	--	--	--	--	--	--	Immunoglobulin domain;; Immunoglobulin domain;; Immunoglobulin I-set domain;; Immunoglobulin domain	Neuroglian (Precursor) GN=Nrg OS=Drosophila melanogaster (Fruit fly) PE=1 SV=2	PREDICTED: cell adhesion molecule 4-like [Crassostrea gigas]
TR9716_c0_g1	--	--	--	--	[S]	Function unknown	Ima1 N-terminal domain	Nuclear pore complex protein DDB_G0274915 GN=DDB_G0274915 OS=Dictyostelium discoideum (Slime mold) PE=4 SV=2	PREDICTED: transmembrane protein 201-like [Crassostrea gigas]
TR19550_c0_g1	[R]	General function prediction only	--	--	[R]	General function prediction only	Ankyrin repeats (many copies);; Ankyrin repeats (3 copies);; Ankyrin repeats (many copies);; Ankyrin repeat;; Ankyrin repeat	Ankyrin repeat, bromo and BTB domain-containing protein DDB_G0293800 GN=DDB_G0293800 OS=Dictyostelium discoideum (Slime mold) PE=3 SV=1	PREDICTED: ankyrin repeat domain-containing protein 66-like [Crassostrea gigas]
TR33307_c1_g1	--	--	--	--	--	--	--	--	PREDICTED: uncharacterized protein LOC105330418 [Crassostrea gigas]
TR10791_c0_g1	[T]	Signal transduction mechanisms	Molecular Function: nucleotide binding (GO:0000166);; Molecular Function: adenylate cyclase activity (GO:0004016);; Biological Process: cAMP biosynthetic process (GO:0006171);; Cellular Component: integral component of membrane (GO:0016021);; Biological Process: intracellular signal transduction (GO:0035556);;	--	[C]	Energy production and conversion	Adenylate and Guanylate cyclase catalytic domain	Ca(2+)/calmodulin-responsive adenylate cyclase GN=rut OS=Drosophila melanogaster (Fruit fly) PE=1 SV=2	hypothetical protein LOTGIDRAFT_135033 [Lottia gigantea]
TR9318_c1_g2	--	--	--	--	--	--	Tetratricopeptide repeat;; Tetratricopeptide repeat	--	--
[truncated: 31,476 more rows]
