# Supplementary material for: Transcriptome-wide identification and characterization of the Sox gene family and microsatellites for Corbicula fluminea
Source: PeerJ. 2019 Oct 22;7:e7770. doi: 10.7717/peerj.7770 (PMC6814067; doi:10.7717/peerj.7770)
Supplement: Table S3 [file peerj-07-7770-s003.xlsx]

## Sheet: Sheet2
Table S3. The results of homologous analysis against the noncoding RNA database for un-annotated Corbicula fluminea unigenes.
Query name	Target name	Accession	Mdl	Mdl from	Mdl to	Seq from	Seq to	Strand	Trunc	Pass	GC	Bias	Score	E-value	Inc	Description of target
TR23874_c5_g1	5_8S_rRNA	RF00002	cm	8	154	4	149	+	no	2	0.55	0	52.9	2.5e-12	!	5.8S ribosomal RNA
TR50522_c2_g1	5_8S_rRNA	RF00002	cm	1	154	3113	3266	+	no	1	0.58	0	130.2	1e-33	!	5.8S ribosomal RNA
TR50522_c2_g2	5_8S_rRNA	RF00002	cm	1	154	107	260	+	no	1	0.58	0	130.2	3.7e-34	!	5.8S ribosomal RNA
TR50522_c2_g2	5_8S_rRNA	RF00002	cm	1	154	778	931	+	no	1	0.58	0	130.2	3.7e-34	!	5.8S ribosomal RNA
TR23874_c3_g5	5_8S_rRNA	RF00002	cm	1	154	2654	2509	-	no	1	0.39	0	42.5	7.5e-09	!	5.8S ribosomal RNA
TR11288_c0_g2	5_8S_rRNA	RF00002	cm	1	154	430	282	-	no	1	0.54	0	45	2.6e-10	!	5.8S ribosomal RNA
TR30356_c1_g1	5_ureB_sRNA	RF02514	cm	1	292	999	827	-	no	1	0.51	0	43.5	3.6e-10	!	5' ureB small RNA
TR2498_c0_g1	5S_rRNA	RF00001	cm	1	119	56	174	+	no	1	0.55	0	121.9	3.5e-28	!	5S ribosomal RNA
TR34179_c0_g1	7SK	RF00100	cm	11	330	1	295	+	5'	2	0.51	0	48.8	4.6e-12	!	7SK RNA
TR20537_c0_g1	ACEA_U3	RF01848	cm	1	220	40	258	+	no	1	0.54	0	74.3	3.2e-15	!	ACEA small nucleolar RNA U3
TR20537_c0_g2	ACEA_U3	RF01848	cm	1	220	40	258	+	no	1	0.54	0	74.9	2.3e-15	!	ACEA small nucleolar RNA U3
TR33521_c0_g1	Histone3	RF00032	cm	1	46	36	82	+	no	1	0.49	0	26.1	1.6e-05	!	Histone 3' UTR stem-loop
TR34365_c0_g1	Histone3	RF00032	cm	1	46	138	94	-	no	1	0.44	0	34.5	1.9e-08	!	Histone 3' UTR stem-loop
TR55448_c2_g2	Histone3	RF00032	cm	1	46	97	53	-	no	1	0.42	0	37.6	1e-09	!	Histone 3' UTR stem-loop
TR55448_c2_g1	Histone3	RF00032	cm	1	46	97	53	-	no	1	0.42	0	37.6	3e-09	!	Histone 3' UTR stem-loop
TR17979_c1_g1	Histone3	RF00032	cm	1	46	769	723	-	no	1	0.45	0	28.7	1.6e-05	!	Histone 3' UTR stem-loop
TR12368_c0_g1	Histone3	RF00032	cm	1	46	315	270	-	no	1	0.48	0	32.8	8.3e-08	!	Histone 3' UTR stem-loop
TR48336_c0_g1	Intron_gpII	RF00029	cm	1	93	190	275	+	no	1	0.65	0	42.4	1.9e-07	!	Group II catalytic intron
TR38373_c0_g1	Intron_gpII	RF00029	cm	1	93	670	597	-	no	1	0.57	0	58.5	4.3e-11	!	Group II catalytic intron
TR16384_c0_g1	Intron_gpII	RF00029	cm	1	93	206	274	+	no	1	0.46	0	41.8	7.5e-07	!	Group II catalytic intron
TR16263_c0_g1	Intron_gpII	RF00029	cm	1	93	305	383	+	no	1	0.47	0	50.2	4.9e-09	!	Group II catalytic intron
TR22400_c0_g1	Intron_gpII	RF00029	cm	1	81	81	1	-	3'	3	0.48	0	41.4	8.6e-07	!	Group II catalytic intron
TR42647_c0_g1	Intron_gpII	RF00029	cm	1	93	245	321	+	no	1	0.43	0	40.1	6.9e-07	!	Group II catalytic intron
TR36621_c0_g1	Intron_gpII	RF00029	cm	1	93	209	298	+	no	1	0.34	0	44.5	7e-08	!	Group II catalytic intron
TR54935_c0_g1	IsrR	RF01419	cm	1	187	232	46	-	no	1	0.35	1.4	204.3	2.7e-45	!	Antisense RNA which regulates isiA express
TR55169_c0_g1	K_chan_RES	RF00485	cm	1	114	1281	1168	-	no	1	0.52	0	86.5	2.9e-18	!	Potassium channel RNA editing signal
TR26348_c0_g1	K_chan_RES	RF00485	cm	1	114	197	310	+	no	1	0.55	0	66.4	2.6e-13	!	Potassium channel RNA editing signal
TR28701_c0_g1	K_chan_RES	RF00485	cm	1	114	1373	1486	+	no	1	0.5	0	51.9	4.4e-09	!	Potassium channel RNA editing signal
TR2076_c0_g1	LSU_rRNA_eukarya	RF02543	cm	324	746	575	1	-	5'&3'	4	0.5	0	188.7	8.1e-46	!	Eukaryotic large subunit ribosomal RNA
TR53980_c0_g1	LSU_rRNA_eukarya	RF02543	cm	2258	2936	653	1	-	5'&3'	4	0.55	0	336.2	7.8e-84	!	Eukaryotic large subunit ribosomal RNA
TR8423_c0_g1	LSU_rRNA_eukarya	RF02543	cm	28	378	351	1	-	5'&3'	4	0.46	0	299.9	9.7e-75	!	Eukaryotic large subunit ribosomal RNA
TR49376_c0_g1	LSU_rRNA_eukarya	RF02543	cm	2909	3354	331	1	-	5'&3'	4	0.52	0	137.4	8.1e-33	!	Eukaryotic large subunit ribosomal RNA
TR41851_c0_g1	LSU_rRNA_eukarya	RF02543	cm	1189	1543	354	1	-	5'&3'	4	0.49	0	395.7	1.9e-99	!	Eukaryotic large subunit ribosomal RNA
TR46582_c1_g1	LSU_rRNA_eukarya	RF02543	cm	1214	1636	1	382	+	5'&3'	4	0.57	1.6	154.8	2.9e-37	!	Eukaryotic large subunit ribosomal RNA
TR34588_c0_g2	LSU_rRNA_eukarya	RF02543	cm	934	1313	379	1	-	5'&3'	4	0.47	0	413.1	6.3e-104	!	Eukaryotic large subunit ribosomal RNA
TR23874_c6_g1	LSU_rRNA_eukarya	RF02543	cm	2303	2814	1	485	+	5'&3'	4	0.5	0	183.1	1.9e-44	!	Eukaryotic large subunit ribosomal RNA
TR23874_c1_g1	LSU_rRNA_eukarya	RF02543	cm	1274	2296	1	964	+	5'&3'	4	0.55	6.8	288	3.2e-71	!	Eukaryotic large subunit ribosomal RNA
TR34144_c0_g1	LSU_rRNA_eukarya	RF02543	cm	1249	1668	1	424	+	5'&3'	4	0.54	0.1	119.6	4e-28	!	Eukaryotic large subunit ribosomal RNA
TR34443_c0_g1	LSU_rRNA_eukarya	RF02543	cm	1403	2209	1	634	+	5'&3'	4	0.53	0.9	190.2	3.5e-46	!	Eukaryotic large subunit ribosomal RNA
TR29238_c0_g2	LSU_rRNA_eukarya	RF02543	cm	2874	3329	338	1	-	5'&3'	4	0.56	0	171.7	1.2e-41	!	Eukaryotic large subunit ribosomal RNA
TR12630_c0_g1	LSU_rRNA_eukarya	RF02543	cm	919	1314	1	350	+	5'&3'	4	0.51	0	111	5.6e-26	!	Eukaryotic large subunit ribosomal RNA
TR41282_c2_g2	LSU_rRNA_eukarya	RF02543	cm	965	1343	1	333	+	5'&3'	4	0.52	0	86.1	1.4e-19	!	Eukaryotic large subunit ribosomal RNA
TR23874_c3_g1	LSU_rRNA_eukarya	RF02543	cm	944	2316	1084	1	-	5'&3'	4	0.54	6.2	358.4	2.4e-89	!	Eukaryotic large subunit ribosomal RNA
TR1707_c0_g1	LSU_rRNA_eukarya	RF02543	cm	1	402	83	473	+	3'	3	0.49	0.4	192.9	5.2e-47	!	Eukaryotic large subunit ribosomal RNA
TR23874_c5_g1	LSU_rRNA_eukarya	RF02543	cm	1	965	142	837	+	3'	3	0.53	2.3	293.1	1.3e-72	!	Eukaryotic large subunit ribosomal RNA
TR50905_c0_g1	LSU_rRNA_eukarya	RF02543	cm	2957	3340	377	1	-	5'&3'	4	0.44	0	253.8	8.4e-63	!	Eukaryotic large subunit ribosomal RNA
TR41901_c0_g1	LSU_rRNA_eukarya	RF02543	cm	2445	2934	461	1	-	5'&3'	4	0.55	0	235.1	6.9e-58	!	Eukaryotic large subunit ribosomal RNA
TR3080_c0_g1	LSU_rRNA_eukarya	RF02543	cm	1084	1449	1	349	+	5'	4	0.48	0	88.4	3.7e-20	!	Eukaryotic large subunit ribosomal RNA
TR57479_c5_g4	LSU_rRNA_eukarya	RF02543	cm	1	986	678	1	-	3'	3	0.49	8.4	304.9	1.2e-75	!	Eukaryotic large subunit ribosomal RNA
TR35425_c0_g1	LSU_rRNA_eukarya	RF02543	cm	1209	2166	768	1	-	5'&3'	4	0.53	5.3	224.8	5.2e-55	!	Eukaryotic large subunit ribosomal RNA
TR57479_c0_g1	LSU_rRNA_eukarya	RF02543	cm	1	355	390	1	-	3'	3	0.5	0	150.9	4.1e-36	!	Eukaryotic large subunit ribosomal RNA
TR36578_c0_g1	LSU_rRNA_eukarya	RF02543	cm	688	1209	1	427	+	5'&3'	4	0.45	0.3	113.4	1.6e-26	!	Eukaryotic large subunit ribosomal RNA
TR8314_c0_g3	LSU_rRNA_eukarya	RF02543	cm	2447	2819	371	1	-	5'&3'	4	0.44	0	340.7	3.1e-85	!	Eukaryotic large subunit ribosomal RNA
TR23874_c3_g7	LSU_rRNA_eukarya	RF02543	cm	944	2362	1130	1	-	5'&3'	4	0.54	6.3	416	3.3e-104	!	Eukaryotic large subunit ribosomal RNA
TR31367_c0_g1	LSU_rRNA_eukarya	RF02543	cm	873	2017	1	1039	+	5'&3'	4	0.46	13.6	275.8	4.9e-68	!	Eukaryotic large subunit ribosomal RNA
TR47072_c0_g1	LSU_rRNA_eukarya	RF02543	cm	2910	3291	1	373	+	5'&3'	4	0.44	0	197.8	2.3e-48	!	Eukaryotic large subunit ribosomal RNA
TR46252_c0_g1	LSU_rRNA_eukarya	RF02543	cm	2213	2553	1	370	+	5'&3'	4	0.5	0	118.9	5.1e-28	!	Eukaryotic large subunit ribosomal RNA
TR41282_c2_g1	LSU_rRNA_eukarya	RF02543	cm	965	1343	1	333	+	5'&3'	4	0.51	0	66.2	1.9e-14	!	Eukaryotic large subunit ribosomal RNA
TR29649_c0_g1	LSU_rRNA_eukarya	RF02543	cm	924	1303	1	335	+	5'&3'	4	0.47	0	82.1	1.5e-18	!	Eukaryotic large subunit ribosomal RNA
TR53134_c0_g1	LSU_rRNA_eukarya	RF02543	cm	1	426	138	553	+	3'	3	0.42	5.8	199.9	9.7e-49	!	Eukaryotic large subunit ribosomal RNA
TR51446_c0_g2	LSU_rRNA_eukarya	RF02543	cm	10	395	385	1	-	5'&3'	4	0.44	0.2	318.5	1.7e-79	!	Eukaryotic large subunit ribosomal RNA
TR41282_c1_g2	LSU_rRNA_eukarya	RF02543	cm	342	1658	1	985	+	5'&3'	4	0.48	9	406.9	6.8e-102	!	Eukaryotic large subunit ribosomal RNA
TR23874_c0_g1	LSU_rRNA_eukarya	RF02543	cm	674	1290	513	1	-	3'	4	0.52	3.1	183	2.4e-44	!	Eukaryotic large subunit ribosomal RNA
TR3410_c0_g1	LSU_rRNA_eukarya	RF02543	cm	1062	1496	1	437	+	5'&3'	4	0.46	0	380.5	2e-95	!	Eukaryotic large subunit ribosomal RNA
TR57479_c5_g3	LSU_rRNA_eukarya	RF02543	cm	802	1167	384	1	-	5'&3'	4	0.51	0	110.2	9.4e-26	!	Eukaryotic large subunit ribosomal RNA
TR34588_c0_g1	LSU_rRNA_eukarya	RF02543	cm	934	1313	380	1	-	5'&3'	4	0.51	0	413.3	5.6e-104	!	Eukaryotic large subunit ribosomal RNA
TR38023_c0_g1	LSU_rRNA_eukarya	RF02543	cm	1197	2307	902	1	-	5'&3'	4	0.51	3.4	292.4	2.2e-72	!	Eukaryotic large subunit ribosomal RNA
TR41282_c4_g1	LSU_rRNA_eukarya	RF02543	cm	383	971	1	344	+	5'&3'	4	0.5	0	135.3	2.8e-32	!	Eukaryotic large subunit ribosomal RNA
TR56502_c1_g1	LSU_rRNA_eukarya	RF02543	cm	2930	3401	354	10	-	5'	2	0.46	0	127.1	3.9e-30	!	Eukaryotic large subunit ribosomal RNA
TR14620_c0_g2	LSU_rRNA_eukarya	RF02543	cm	2408	2908	19	491	+	3'	4	0.53	0	257.5	1.2e-63	!	Eukaryotic large subunit ribosomal RNA
TR30829_c0_g1	LSU_rRNA_eukarya	RF02543	cm	22	497	2	485	+	3'	4	0.42	1.9	276.9	1.2e-68	!	Eukaryotic large subunit ribosomal RNA
TR39569_c0_g2	LSU_rRNA_eukarya	RF02543	cm	1348	1854	449	1	-	5'&3'	4	0.54	0.2	84.9	3.8e-19	!	Eukaryotic large subunit ribosomal RNA
TR46252_c1_g1	LSU_rRNA_eukarya	RF02543	cm	1341	2298	773	1	-	5'&3'	4	0.43	8.6	220.5	6.7e-54	!	Eukaryotic large subunit ribosomal RNA
TR41282_c3_g1	LSU_rRNA_eukarya	RF02543	cm	1	1266	119	1090	+	3'	3	0.51	4.6	300.9	1.6e-74	!	Eukaryotic large subunit ribosomal RNA
TR14620_c0_g1	LSU_rRNA_eukarya	RF02543	cm	2479	2908	1	388	+	5'&3'	4	0.55	0	171	1.9e-41	!	Eukaryotic large subunit ribosomal RNA
TR30829_c0_g2	LSU_rRNA_eukarya	RF02543	cm	22	503	2	485	+	3'	4	0.42	2.9	278	5.9e-69	!	Eukaryotic large subunit ribosomal RNA
TR12319_c0_g2	LSU_rRNA_eukarya	RF02543	cm	1590	1990	398	1	-	5'&3'	4	0.48	0	347.2	6.7e-87	!	Eukaryotic large subunit ribosomal RNA
TR8314_c0_g1	LSU_rRNA_eukarya	RF02543	cm	2333	2667	331	1	-	5'&3'	4	0.47	0	342.1	1.2e-85	!	Eukaryotic large subunit ribosomal RNA
TR31367_c0_g2	LSU_rRNA_eukarya	RF02543	cm	873	2196	1	1095	+	5'&3'	4	0.46	12.3	297.2	1.5e-73	!	Eukaryotic large subunit ribosomal RNA
TR39569_c0_g1	LSU_rRNA_eukarya	RF02543	cm	1348	1854	449	1	-	5'&3'	4	0.54	0.3	83.4	9.3e-19	!	Eukaryotic large subunit ribosomal RNA
TR42037_c0_g1	LSU_rRNA_eukarya	RF02543	cm	36	519	1	469	+	5'&3'	4	0.52	0	159.8	1.9e-38	!	Eukaryotic large subunit ribosomal RNA
TR41282_c1_g1	LSU_rRNA_eukarya	RF02543	cm	342	1658	1	982	+	5'&3'	4	0.48	8.1	410.4	8.3e-103	!	Eukaryotic large subunit ribosomal RNA
TR23874_c3_g8	LSU_rRNA_eukarya	RF02543	cm	1278	2685	1181	1	-	5'&3'	4	0.54	15.1	453	1e-113	!	Eukaryotic large subunit ribosomal RNA
TR8314_c0_g2	LSU_rRNA_eukarya	RF02543	cm	2333	2819	481	1	-	5'&3'	4	0.45	0	535.5	2.1e-135	!	Eukaryotic large subunit ribosomal RNA
TR5551_c0_g1	LSU_rRNA_eukarya	RF02543	cm	1579	1919	349	1	-	5'&3'	4	0.47	0	207.3	7.6e-51	!	Eukaryotic large subunit ribosomal RNA
TR41391_c1_g1	LSU_rRNA_eukarya	RF02543	cm	1939	2759	1	685	+	5'&3'	4	0.43	48.3	103.2	1.1e-23	!	Eukaryotic large subunit ribosomal RNA
TR24387_c0_g1	LSU_rRNA_eukarya	RF02543	cm	2783	3117	1	332	+	5'&3'	4	0.55	0	175.3	1.3e-42	!	Eukaryotic large subunit ribosomal RNA
TR44329_c0_g1	LSU_rRNA_eukarya	RF02543	cm	181	682	645	1	-	5'&3'	4	0.46	5.9	211.4	1.2e-51	!	Eukaryotic large subunit ribosomal RNA
TR13134_c0_g1	LSU_rRNA_eukarya	RF02543	cm	1409	1905	1	510	+	5'&3'	4	0.47	0	349.5	2.2e-87	!	Eukaryotic large subunit ribosomal RNA
TR23874_c3_g2	LSU_rRNA_eukarya	RF02543	cm	250	1260	712	1	-	5'&3'	4	0.52	3.5	220.6	5.8e-54	!	Eukaryotic large subunit ribosomal RNA
TR23874_c3_g6	LSU_rRNA_eukarya	RF02543	cm	2731	3145	414	1	-	5'&3'	4	0.53	0	209.6	2.3e-51	!	Eukaryotic large subunit ribosomal RNA
TR51446_c0_g3	LSU_rRNA_eukarya	RF02543	cm	118	650	562	1	-	5'&3'	4	0.46	0.1	226.8	1.1e-55	!	Eukaryotic large subunit ribosomal RNA
TR51446_c1_g1	LSU_rRNA_eukarya	RF02543	cm	22	381	1	352	+	5'&3'	4	0.47	0	312.2	6.3e-78	!	Eukaryotic large subunit ribosomal RNA
TR12044_c0_g1	LSU_rRNA_eukarya	RF02543	cm	1403	2254	1	566	+	5'&3'	4	0.56	5.9	188.8	7.1e-46	!	Eukaryotic large subunit ribosomal RNA
TR23874_c7_g1	LSU_rRNA_eukarya	RF02543	cm	1	2183	1548	1	-	3'	3	0.39	78	508.1	8.8e-128	!	Eukaryotic large subunit ribosomal RNA
TR41391_c0_g1	LSU_rRNA_eukarya	RF02543	cm	813	954	944	804	-	no	4	0.47	0	81.1	8.7e-18	!	Eukaryotic large subunit ribosomal RNA
TR15207_c0_g1	LSU_rRNA_eukarya	RF02543	cm	668	1139	1	443	+	5'&3'	4	0.46	0	370.5	7.3e-93	!	Eukaryotic large subunit ribosomal RNA
TR51419_c0_g1	LSU_rRNA_eukarya	RF02543	cm	2273	2740	442	1	-	5'&3'	4	0.55	0	194	2.7e-47	!	Eukaryotic large subunit ribosomal RNA
TR23874_c3_g4	LSU_rRNA_eukarya	RF02543	cm	2197	3145	943	1	-	5'&3'	4	0.55	4	517.3	2e-130	!	Eukaryotic large subunit ribosomal RNA
TR23874_c2_g1	LSU_rRNA_eukarya	RF02543	cm	1	1264	1028	1	-	3'	3	0.55	22.9	308.5	2e-76	!	Eukaryotic large subunit ribosomal RNA
TR11288_c0_g1	LSU_rRNA_eukarya	RF02543	cm	1	348	288	1	-	3'	3	0.52	0.5	107.5	5.8e-25	!	Eukaryotic large subunit ribosomal RNA
TR49561_c0_g1	LSU_rRNA_eukarya	RF02543	cm	1891	3043	207	828	+	3'	4	0.34	40.2	205.9	4.2e-50	!	Eukaryotic large subunit ribosomal RNA
TR52103_c0_g1	LSU_rRNA_eukarya	RF02543	cm	716	1256	1	441	+	5'&3'	4	0.53	0	105	2.5e-24	!	Eukaryotic large subunit ribosomal RNA
TR57479_c4_g1	LSU_rRNA_eukarya	RF02543	cm	1	330	269	1	-	3'	3	0.49	0	95.7	4.6e-22	!	Eukaryotic large subunit ribosomal RNA
TR57479_c5_g1	LSU_rRNA_eukarya	RF02543	cm	1088	2324	1091	1	-	5'&3'	4	0.52	8.9	352.2	9.4e-88	!	Eukaryotic large subunit ribosomal RNA
TR51013_c0_g1	LSU_rRNA_eukarya	RF02543	cm	1505	1984	1	548	+	5'&3'	4	0.49	0	200.1	8.7e-49	!	Eukaryotic large subunit ribosomal RNA
TR34890_c1_g1	LSU_rRNA_eukarya	RF02543	cm	1891	3201	681	1	-	3'	3	0.3	74.5	112	2e-25	!	Eukaryotic large subunit ribosomal RNA
TR19209_c0_g1	LSU_rRNA_eukarya	RF02543	cm	1	375	347	1	-	3'	3	0.29	44.6	98.5	1.3e-22	!	Eukaryotic large subunit ribosomal RNA
TR35029_c0_g1	LSU_rRNA_eukarya	RF02543	cm	315	1036	1	453	+	5'&3'	4	0.36	31	167.3	2.1e-40	!	Eukaryotic large subunit ribosomal RNA
TR27210_c0_g1	LSU_rRNA_eukarya	RF02543	cm	1386	1673	1	335	+	5'&3'	4	0.52	0.1	57.2	3.9e-12	!	Eukaryotic large subunit ribosomal RNA
TR23874_c3_g5	LSU_rRNA_eukarya	RF02543	cm	1	3041	2514	1	-	3'	3	0.43	65.0 1	1147.2	1.7e-292	!	Eukaryotic large subunit ribosomal RNA
TR29238_c0_g1	LSU_rRNA_eukarya	RF02543	cm	2874	3329	338	1	-	5'&3'	4	0.53	0	165	6.2e-40	!	Eukaryotic large subunit ribosomal RNA
TR6688_c0_g1	LSU_rRNA_eukarya	RF02543	cm	1	240	138	365	+	3'	3	0.39	5	114	9.7e-27	!	Eukaryotic large subunit ribosomal RNA
TR44355_c1_g1	LSU_rRNA_eukarya	RF02543	cm	671	1134	398	1	-	3'	4	0.53	0	137	1.3e-32	!	Eukaryotic large subunit ribosomal RNA
TR23874_c4_g1	LSU_rRNA_eukarya	RF02543	cm	2135	3192	1	1040	+	5'&3'	4	0.44	4.4	527.5	5.4e-133	!	Eukaryotic large subunit ribosomal RNA
TR51446_c0_g1	LSU_rRNA_eukarya	RF02543	cm	10	650	658	1	-	5'&3'	4	0.48	0.2	345.2	3.8e-86	!	Eukaryotic large subunit ribosomal RNA
TR12044_c0_g2	LSU_rRNA_eukarya	RF02543	cm	1518	2254	1	449	+	5'&3'	4	0.59	2.1	108.3	3.5e-25	!	Eukaryotic large subunit ribosomal RNA
TR54591_c2_g1	LSU_rRNA_eukarya	RF02543	cm	1444	1956	504	1	-	5'&3'	4	0.46	0	479	8.2e-121	!	Eukaryotic large subunit ribosomal RNA
TR54245_c0_g1	LSU_rRNA_eukarya	RF02543	cm	1	458	450	1	-	3'	3	0.55	0.5	172	1.2e-41	!	Eukaryotic large subunit ribosomal RNA
TR53980_c1_g1	LSU_rRNA_eukarya	RF02543	cm	2823	3401	1	402	+	5'	2	0.58	0	229.2	2.2e-56	!	Eukaryotic large subunit ribosomal RNA
TR57479_c5_g2	LSU_rRNA_eukarya	RF02543	cm	804	1654	782	1	-	5'&3'	4	0.51	3	266	1.2e-65	!	Eukaryotic large subunit ribosomal RNA
TR12630_c0_g2	LSU_rRNA_eukarya	RF02543	cm	919	1314	1	350	+	5'&3'	4	0.52	0	112.5	2.3e-26	!	Eukaryotic large subunit ribosomal RNA
TR11288_c0_g2	LSU_rRNA_eukarya	RF02543	cm	1	348	288	1	-	3'	3	0.52	0	124.2	2.9e-29	!	Eukaryotic large subunit ribosomal RNA
TR12319_c0_g1	LSU_rRNA_eukarya	RF02543	cm	1427	1990	575	1	-	5'&3'	4	0.47	0	537.6	7.4e-136	!	Eukaryotic large subunit ribosomal RNA
TR51446_c1_g2	LSU_rRNA_eukarya	RF02543	cm	22	414	1	385	+	5'&3'	4	0.46	0.1	344.1	4.1e-86	!	Eukaryotic large subunit ribosomal RNA
TR54591_c0_g1	LSU_rRNA_eukarya	RF02543	cm	1	3401	4098	350	-	no	1	0.57	63.2 3	3031.1	0	!	Eukaryotic large subunit ribosomal RNA
TR45078_c0_g1	LSU_rRNA_eukarya	RF02543	cm	1182	1523	1	333	+	5'&3'	4	0.5	0	124.6	1.6e-29	!	Eukaryotic large subunit ribosomal RNA
TR41282_c0_g1	LSU_rRNA_eukarya	RF02543	cm	671	1018	66	351	+	3'	4	0.52	0.1	91.6	5.6e-21	!	Eukaryotic large subunit ribosomal RNA
TR23874_c3_g3	LSU_rRNA_eukarya	RF02543	cm	250	1260	712	1	-	5'&3'	4	0.52	4.2	223.5	1e-54	!	Eukaryotic large subunit ribosomal RNA
TR50884_c0_g1	LSU_rRNA_eukarya	RF02543	cm	2456	2802	1	316	+	5'	4	0.54	0	111.6	3.5e-26	!	Eukaryotic large subunit ribosomal RNA
TR41851_c0_g3	LSU_rRNA_eukarya	RF02543	cm	1195	1543	349	1	-	5'&3'	4	0.5	0	353.4	1.5e-88	!	Eukaryotic large subunit ribosomal RNA
TR41851_c0_g2	LSU_rRNA_eukarya	RF02543	cm	1227	1797	630	1	-	5'&3'	4	0.64	34.6	461.4	3.7e-116	!	Eukaryotic large subunit ribosomal RNA
TR24989_c0_g1	mir-449	RF00711	cm	1	90	255	169	-	no	1	0.48	0	45.2	3.2e-10	!	microRNA mir-449
TR22949_c0_g1	MIR821	RF00885	cm	1	275	389	672	+	no	1	0.35	4.1	174.7	7.8e-40	!	microRNA MIR821
TR22949_c0_g1	MIR821	RF00885	cm	1	275	672	389	-	no	1	0.35	4.1	174.7	7.8e-40	!	microRNA MIR821
TR56432_c0_g1	RMST_9	RF01970	cm	1	193	36	227	+	no	1	0.48	0	82.2	9.7e-14	!	Rhabdomyosarcoma 2 associated transcript c
TR18097_c0_g1	RNaseP_bact_a	RF00010	cm	12	348	397	1	-	no	1	0.66	23.3	251	1.5e-81	!	Bacterial RNase P class A
TR25372_c0_g1	SECIS_1	RF00031	cm	1	64	271	334	+	no	1	0.25	0.2	35.7	2.7e-05	!	Selenocysteine insertion sequence 1
TR37456_c0_g2	SNORA73	RF00045	cm	1	219	260	477	+	no	1	0.45	0	101.1	1.1e-25	!	Small nucleolar RNA SNORA73 family
TR37456_c0_g1	SNORA73	RF00045	cm	1	219	260	477	+	no	1	0.46	0	100.6	1.2e-25	!	Small nucleolar RNA SNORA73 family
TR49490_c0_g1	SNORD2	RF01299	cm	1	70	330	392	+	no	1	0.44	0	41.5	1.7e-07	!	Small nucleolar RNA SNORD2
TR9995_c0_g1	SNORD58	RF00151	cm	1	65	224	148	-	no	1	0.35	0	44.6	1.2e-08	!	Small nucleolar RNA SNORD58
TR17788_c0_g1	SSU_rRNA_eukarya	RF01960	cm	617	1064	1	416	+	5'&3'	4	0.39	1.7	280.8	5e-83	!	Eukaryotic small subunit ribosomal RNA
TR5117_c0_g1	SSU_rRNA_eukarya	RF01960	cm	445	1091	477	1	-	5'&3'	4	0.58	4.3	107.8	2.7e-30	!	Eukaryotic small subunit ribosomal RNA
TR10370_c5_g2	SSU_rRNA_eukarya	RF01960	cm	1	1192	958	1	-	3'	3	0.56	16.3	358.3	3e-106	!	Eukaryotic small subunit ribosomal RNA
TR50522_c2_g1	SSU_rRNA_eukarya	RF01960	cm	1	1851	765	2590	+	no	1	0.52	0.0 1	1735	0	!	Eukaryotic small subunit ribosomal RNA
TR50405_c0_g1	SSU_rRNA_eukarya	RF01960	cm	730	1232	1	546	+	5'&3'	4	0.57	13.4	341.1	2.7e-101	!	Eukaryotic small subunit ribosomal RNA
TR57498_c3_g5	SSU_rRNA_eukarya	RF01960	cm	1129	1825	627	1	-	3'	4	0.52	0	323	1.1e-95	!	Eukaryotic small subunit ribosomal RNA
TR35486_c0_g1	SSU_rRNA_eukarya	RF01960	cm	1	1240	936	1	-	3'	3	0.4	32.3	284.6	7.4e-84	!	Eukaryotic small subunit ribosomal RNA
TR10370_c1_g1	SSU_rRNA_eukarya	RF01960	cm	1	587	163	663	+	3'	3	0.55	0.7	162.4	9.1e-47	!	Eukaryotic small subunit ribosomal RNA
TR10733_c0_g2	SSU_rRNA_eukarya	RF01960	cm	1	733	677	1	-	3'	3	0.5	1.2	185.7	7.4e-54	!	Eukaryotic small subunit ribosomal RNA
TR57498_c3_g1	SSU_rRNA_eukarya	RF01960	cm	1	1354	1109	1	-	3'	3	0.55	19.3	411.9	1.6e-122	!	Eukaryotic small subunit ribosomal RNA
TR10370_c4_g2	SSU_rRNA_eukarya	RF01960	cm	683	1068	1	367	+	5'&3'	4	0.55	0.2	90.1	5.2e-25	!	Eukaryotic small subunit ribosomal RNA
TR9524_c0_g1	SSU_rRNA_eukarya	RF01960	cm	388	1068	1	523	+	5'&3'	4	0.56	2.6	139.7	5.8e-40	!	Eukaryotic small subunit ribosomal RNA
TR57498_c3_g3	SSU_rRNA_eukarya	RF01960	cm	917	1357	432	1	-	5'&3'	4	0.53	0	216.8	1.6e-63	!	Eukaryotic small subunit ribosomal RNA
TR10370_c1_g2	SSU_rRNA_eukarya	RF01960	cm	1	587	163	669	+	3'	3	0.55	0.2	161.6	1.6e-46	!	Eukaryotic small subunit ribosomal RNA
TR10733_c0_g1	SSU_rRNA_eukarya	RF01960	cm	1	412	331	1	-	3'	3	0.5	0	88	2.2e-24	!	Eukaryotic small subunit ribosomal RNA
TR23660_c0_g1	SSU_rRNA_eukarya	RF01960	cm	791	1113	1	338	+	5'&3'	4	0.56	0.6	97.4	3e-27	!	Eukaryotic small subunit ribosomal RNA
TR23660_c0_g2	SSU_rRNA_eukarya	RF01960	cm	6	720	1	629	+	5'&3'	4	0.59	9.7	182.2	8.2e-53	!	Eukaryotic small subunit ribosomal RNA
TR21767_c0_g2	SSU_rRNA_eukarya	RF01960	cm	1253	1828	1	500	+	5'&3'	4	0.57	0.1	249.7	1.8e-73	!	Eukaryotic small subunit ribosomal RNA
TR17444_c0_g1	SSU_rRNA_eukarya	RF01960	cm	1234	1698	427	1	-	5'&3'	4	0.44	0	198.8	4.7e-58	!	Eukaryotic small subunit ribosomal RNA
TR29917_c0_g1	SSU_rRNA_eukarya	RF01960	cm	581	1054	457	1	-	5'&3'	4	0.39	11.6	332.9	7.2e-99	!	Eukaryotic small subunit ribosomal RNA
TR57498_c3_g2	SSU_rRNA_eukarya	RF01960	cm	1129	1555	381	1	-	3'	4	0.56	0	196.8	1.8e-57	!	Eukaryotic small subunit ribosomal RNA
TR29917_c0_g2	SSU_rRNA_eukarya	RF01960	cm	581	1054	457	1	-	5'&3'	4	0.39	10.7	332.4	9.9e-99	!	Eukaryotic small subunit ribosomal RNA
TR47268_c0_g2	SSU_rRNA_eukarya	RF01960	cm	45	436	321	5	-	no	4	0.55	0	113.9	2.9e-32	!	Eukaryotic small subunit ribosomal RNA
TR52273_c0_g1	SSU_rRNA_eukarya	RF01960	cm	8	439	1	345	+	5'&3'	4	0.56	0.1	89.3	9e-25	!	Eukaryotic small subunit ribosomal RNA
TR21767_c0_g1	SSU_rRNA_eukarya	RF01960	cm	1253	1709	1	403	+	5'&3'	4	0.57	0	210.9	9.4e-62	!	Eukaryotic small subunit ribosomal RNA
TR12312_c0_g1	SSU_rRNA_eukarya	RF01960	cm	570	1216	1	454	+	5'&3'	4	0.54	0.7	193.3	2.4e-56	!	Eukaryotic small subunit ribosomal RNA
TR2810_c0_g1	SSU_rRNA_eukarya	RF01960	cm	436	1334	1	709	+	5'&3'	4	0.44	5.9	226.9	2.1e-66	!	Eukaryotic small subunit ribosomal RNA
TR10370_c4_g1	SSU_rRNA_eukarya	RF01960	cm	508	1068	1	367	+	5'&3'	4	0.55	0.2	112.4	8.4e-32	!	Eukaryotic small subunit ribosomal RNA
TR47268_c0_g1	SSU_rRNA_eukarya	RF01960	cm	45	436	321	5	-	no	4	0.53	0	109.3	7.1e-31	!	Eukaryotic small subunit ribosomal RNA
TR10370_c5_g1	SSU_rRNA_eukarya	RF01960	cm	1	1373	1117	1	-	3'	3	0.48	9.9	448.6	1e-133	!	Eukaryotic small subunit ribosomal RNA
TR4263_c0_g5	tRNA	RF00005	cm	1	71	81	9	-	no	1	0.63	0	29.3	0.00017	!	tRNA
TR24714_c0_g1	tRNA	RF00005	cm	1	71	3068	3133	+	no	1	0.39	0	32.9	0.00029	!	tRNA
TR10293_c0_g1	tRNA	RF00005	cm	8	63	65	7	-	no	1	0.54	0	35.2	6.3e-06	!	tRNA
TR52016_c0_g2	tRNA	RF00005	cm	1	56	445	502	+	3'	3	0.59	0	31.3	6.3e-05	!	tRNA
TR4263_c0_g6	tRNA	RF00005	cm	1	71	81	9	-	no	1	0.63	0	29.3	0.00016	!	tRNA
TR56010_c0_g2	tRNA	RF00005	cm	1	40	41	1	-	3'	3	0.59	0	29.1	0.00025	!	tRNA
TR46329_c0_g1	tRNA	RF00005	cm	1	71	331	403	+	no	1	0.51	0	35.5	3.7e-06	!	tRNA
TR6352_c0_g1	tRNA	RF00005	cm	1	71	491	557	+	no	1	0.64	0	34.2	1.2e-05	!	tRNA
TR5227_c0_g1	tRNA	RF00005	cm	1	71	1182	1253	+	no	1	0.58	0	38.2	3.5e-06	!	tRNA
TR48347_c0_g1	tRNA	RF00005	cm	1	54	56	1	-	3'	3	0.57	0	35.2	3.6e-06	!	tRNA
TR51819_c0_g1	tRNA	RF00005	cm	1	56	288	345	+	3'	3	0.59	0	32.9	1.5e-05	!	tRNA
TR38454_c3_g3	tRNA	RF00005	cm	1	71	184	250	+	no	1	0.63	0	32.4	2.3e-05	!	tRNA
TR58398_c1_g2	tRNA	RF00005	cm	1	61	63	1	-	3'	3	0.57	0	31.5	0.0001	!	tRNA
TR5965_c0_g1	tRNA	RF00005	cm	1	71	83	11	-	no	1	0.63	0	29.3	0.00019	!	tRNA
TR42312_c0_g2	tRNA	RF00005	cm	1	71	74	8	-	no	1	0.64	0	38	7.4e-07	!	tRNA
TR11234_c0_g1	tRNA	RF00005	cm	1	71	78	7	-	no	1	0.62	0	31.2	8.9e-05	!	tRNA
TR9231_c0_g1	tRNA	RF00005	cm	1	71	161	226	+	no	1	0.55	0	34.7	5.4e-06	!	tRNA
TR10440_c0_g1	tRNA	RF00005	cm	1	71	2891	2963	+	no	1	0.63	0	29.3	0.0014	!	tRNA
TR41844_c0_g1	tRNA	RF00005	cm	1	62	1079	1142	+	3'	3	0.59	0	34.7	1.6e-05	!	tRNA
TR42312_c0_g1	tRNA	RF00005	cm	1	71	74	8	-	no	1	0.64	0	38	7.4e-07	!	tRNA
TR8804_c0_g1	tRNA	RF00005	cm	8	63	760	817	+	no	1	0.6	0	35.8	5.9e-06	!	tRNA
TR41371_c0_g1	tRNA	RF00005	cm	1	54	56	1	-	3'	3	0.57	0	30.5	0.00029	!	tRNA
TR49937_c0_g1	tRNA	RF00005	cm	1	56	347	404	+	3'	3	0.59	0	32.9	1.8e-05	!	tRNA
TR16427_c0_g1	tRNA	RF00005	cm	1	58	60	1	-	3'	3	0.55	0	40.1	4.9e-07	!	tRNA
TR8220_c0_g1	tRNA	RF00005	cm	1	71	1038	1110	+	no	1	0.62	0	30.9	0.00019	!	tRNA
TR14489_c0_g1	tRNA	RF00005	cm	1	71	2187	2259	+	no	1	0.59	0	52.9	2.6e-10	!	tRNA
TR42818_c0_g1	tRNA	RF00005	cm	1	62	64	1	-	3'	3	0.58	0	31.8	3.5e-05	!	tRNA
TR31976_c2_g6	tRNA	RF00005	cm	1	71	563	491	-	no	1	0.67	0	43.2	5.1e-08	!	tRNA
TR31976_c2_g6	tRNA	RF00005	cm	1	71	828	757	-	no	1	0.67	0	37	2.7e-06	!	tRNA
TR156_c0_g1	tRNA	RF00005	cm	10	63	438	491	+	no	1	0.56	0	35.3	5.6e-06	!	tRNA
TR8166_c0_g1	tRNA	RF00005	cm	1	57	59	1	-	3'	3	0.58	0	32.9	2.2e-05	!	tRNA
TR4263_c0_g4	tRNA	RF00005	cm	1	71	81	9	-	no	1	0.63	0	29.3	0.00017	!	tRNA
TR50458_c1_g1	tRNA	RF00005	cm	1	57	59	1	-	3'	3	0.61	0	37.8	1.3e-06	!	tRNA
TR31976_c2_g11	tRNA	RF00005	cm	1	71	563	492	-	no	1	0.67	0	49.7	5.2e-10	!	tRNA
TR4263_c0_g3	tRNA	RF00005	cm	1	71	81	9	-	no	1	0.63	0	29.3	0.00016	!	tRNA
TR41577_c0_g1	tRNA	RF00005	cm	1	62	2013	2076	+	3'	3	0.59	0	34.7	2.9e-05	!	tRNA
TR3044_c12_g1	tRNA	RF00005	cm	1	71	74	2	-	no	1	0.62	0	29.9	0.00014	!	tRNA
TR36954_c0_g2	tRNA	RF00005	cm	1	71	639	709	+	no	1	0.44	0	38.9	8.1e-07	!	tRNA
TR51429_c1_g1	tRNA	RF00005	cm	1	71	372	300	-	no	1	0.58	0	41.4	2.5e-07	!	tRNA
TR30556_c0_g1	tRNA	RF00005	cm	1	71	407	479	+	no	1	0.59	0	30.9	0.00012	!	tRNA
TR16154_c0_g1	tRNA	RF00005	cm	1	62	64	1	-	3'	3	0.59	0	34.7	8e-06	!	tRNA
TR38472_c1_g1	tRNA	RF00005	cm	1	57	272	330	+	3'	3	0.58	0	31.2	4.3e-05	!	tRNA
TR48115_c3_g1	tRNA	RF00005	cm	1	71	179	250	+	no	1	0.67	0	31.3	5.8e-05	!	tRNA
TR22839_c0_g2	tRNA	RF00005	cm	1	71	361	432	+	no	1	0.44	0	55.4	1.2e-11	!	tRNA
TR10146_c1_g1	tRNA	RF00005	cm	1	71	239	309	+	no	1	0.58	0	35.6	2.5e-06	!	tRNA
TR34260_c0_g2	tRNA	RF00005	cm	1	71	255	326	+	no	1	0.6	0	30.7	6.3e-05	!	tRNA
TR48115_c3_g4	tRNA	RF00005	cm	1	71	208	280	+	no	1	0.63	0	31.8	4.3e-05	!	tRNA
TR52016_c0_g1	tRNA	RF00005	cm	1	56	445	502	+	3'	3	0.59	0	31.3	6.3e-05	!	tRNA
TR29240_c0_g1	tRNA	RF00005	cm	1	55	275	331	+	3'	3	0.6	0	31.1	4.6e-05	!	tRNA
TR16154_c0_g2	tRNA	RF00005	cm	1	62	64	1	-	3'	3	0.59	0	34.7	8e-06	!	tRNA
TR10669_c8_g2	tRNA	RF00005	cm	1	71	1217	1289	+	no	1	0.63	0	30.9	0.00022	!	tRNA
TR50625_c0_g1	tRNA	RF00005	cm	1	57	543	601	+	3'	3	0.58	0	32.9	2.8e-05	!	tRNA
TR4263_c0_g1	tRNA	RF00005	cm	1	71	81	9	-	no	1	0.63	0	29.3	0.00017	!	tRNA
TR34260_c0_g1	tRNA	RF00005	cm	1	71	254	325	+	no	1	0.6	0	30.7	6.3e-05	!	tRNA
TR22839_c0_g1	tRNA	RF00005	cm	1	71	361	432	+	no	1	0.44	0	55.4	1.2e-11	!	tRNA
TR5202_c0_g1	tRNA	RF00005	cm	1	61	63	1	-	3'	3	0.6	0	33.1	1.6e-05	!	tRNA
TR38454_c3_g8	tRNA	RF00005	cm	1	71	317	383	+	no	1	0.64	0	38	6.8e-07	!	tRNA
TR29828_c0_g1	tRNA	RF00005	cm	1	61	63	1	-	3'	3	0.6	0	33.1	6.2e-05	!	tRNA
TR12910_c0_g2	tRNA	RF00005	cm	1	71	443	515	+	no	1	0.62	0	30.9	8.7e-05	!	tRNA
TR4263_c0_g2	tRNA	RF00005	cm	1	71	81	9	-	no	1	0.63	0	29.3	0.00018	!	tRNA
TR38454_c3_g5	tRNA	RF00005	cm	1	71	241	311	+	no	1	0.62	0	31.8	3.7e-05	!	tRNA
TR46203_c1_g1	tRNA	RF00005	cm	16	71	877	821	-	5'	2	0.67	0	29.3	0.0004	!	tRNA
TR10448_c9_g4	tRNA	RF00005	cm	1	71	130	202	+	no	1	0.53	0	53	5.1e-10	!	tRNA
TR36954_c0_g1	tRNA	RF00005	cm	1	71	631	701	+	no	1	0.44	0	38.9	8e-07	!	tRNA
TR40714_c0_g1	tRNA	RF00005	cm	1	71	303	232	-	no	1	0.57	0	35.9	3.8e-06	!	tRNA
TR4542_c0_g1	tRNA	RF00005	cm	1	61	63	1	-	3'	3	0.6	0	33.1	1.3e-05	!	tRNA
TR53523_c0_g1	tRNA	RF00005	cm	1	71	332	404	+	no	1	0.62	0	30.2	0.00011	!	tRNA
TR31976_c2_g9	tRNA	RF00005	cm	1	71	198	126	-	no	1	0.68	0	49.7	3e-10	!	tRNA
TR31976_c2_g2	tRNA	RF00005	cm	1	71	563	491	-	no	1	0.67	0	54	3.2e-11	!	tRNA
TR24714_c1_g1	tRNA	RF00005	cm	1	71	2222	2157	-	no	1	0.26	0.7	32.6	0.0002	!	tRNA
TR26008_c0_g1	tRNA	RF00005	cm	1	58	60	1	-	3'	3	0.58	0	30.8	0.00082	!	tRNA
TR17344_c3_g1	tRNA	RF00005	cm	1	71	682	754	+	no	1	0.63	0	29.3	0.00037	!	tRNA
TR39360_c1_g1	tRNA	RF00005	cm	8	63	62	5	-	no	1	0.6	0	35.8	1.2e-05	!	tRNA
TR57493_c1_g1	tRNA	RF00005	cm	1	71	84	12	-	no	1	0.62	0	29.5	0.00033	!	tRNA
TR4263_c0_g7	tRNA	RF00005	cm	1	71	81	9	-	no	1	0.63	0	29.3	0.00017	!	tRNA
TR58398_c1_g3	tRNA	RF00005	cm	1	61	63	1	-	3'	3	0.57	0	31.5	9.9e-05	!	tRNA
TR31976_c2_g7	tRNA	RF00005	cm	1	71	207	135	-	no	1	0.67	0	54	3.4e-11	!	tRNA
TR31976_c2_g1	tRNA	RF00005	cm	1	71	563	491	-	no	1	0.68	0	49.7	5.3e-10	!	tRNA
TR57404_c1_g1	tRNA	RF00005	cm	1	71	135	207	+	no	1	0.56	0	46.4	2.4e-09	!	tRNA
TR2068_c0_g1	tRNA	RF00005	cm	1	57	366	424	+	3'	3	0.58	0	32.9	2e-05	!	tRNA
TR25734_c0_g1	U2	RF00004	cm	1	145	145	1	-	3'	3	0.46	0	141.3	4.4e-31	!	U2 spliceosomal RNA
TR20537_c0_g1	U3	RF00012	cm	1	218	40	257	+	no	1	0.55	0	163.8	4.6e-40	!	Small nucleolar RNA U3
TR20537_c0_g2	U3	RF00012	cm	1	218	40	257	+	no	1	0.54	0	164	4.2e-40	!	Small nucleolar RNA U3
TR39304_c3_g2	U6	RF00026	cm	1	104	18	124	+	no	1	0.43	0	109.1	1e-27	!	U6 spliceosomal RNA
