# Supplementary material for: Transcriptome-wide identification and characterization of the Sox gene family and microsatellites for Corbicula fluminea
Source: PeerJ. 2019 Oct 22;7:e7770. doi: 10.7717/peerj.7770 (PMC6814067; doi:10.7717/peerj.7770)
Supplement: Table S4 [file peerj-07-7770-s004.xlsx]

## Sheet: Sheet1
Table S4. KEGG classification for unigenes of Corbicula fluminea.
Pathway	Pathway ID	Number of unigenes	Unigene ID	KOs
Glycolysis / Gluconeogenesis	ko00010	56	TR10667_c0_g1;TR11880_c0_g1;TR12819_c0_g1;TR16359_c0_g1;TR16395_c0_g1;TR17773_c0_g1;TR18809_c0_g1;TR19836_c1_g1;TR19836_c1_g2;TR20773_c2_g1;TR21745_c0_g1;TR23272_c0_g1;TR23272_c0_g2;TR23272_c0_g3;TR23274_c0_g1;TR23460_c3_g1;TR23981_c0_g1;TR25100_c5_g1;TR25893_c0_g1;TR26634_c0_g1;TR26703_c2_g2;TR29297_c0_g1;TR29861_c0_g1;TR30463_c0_g1;TR30791_c0_g1;TR31704_c0_g1;TR31952_c0_g1;TR3198_c0_g1;TR32278_…	K00844+K01785+K00844+K00134+K00121+K00134+K00844+K00844+K00844+K01835+K01834+K00128+K00128+K00128+K01835+K00382+K01785+K00844+K01596+K01596+K01810+K00149+K14085+K08074+K08074+K00134+K00850+K13997+K01895+K00873+K01689+K01689+K01623+K01785+K00162+K00627+K00627+K03841+K03841+K01792+K01623+K00121+K01785+K00134+K00121+K00128+K00927+K00128+K00128+K00128+K01895+K01803+K00927+K01785+K01623+K01596
Citrate cycle (TCA cycle)	ko00020	34	TR10090_c0_g1;TR10377_c1_g1;TR11733_c0_g1;TR15698_c0_g1;TR17200_c0_g1;TR23460_c3_g1;TR25893_c0_g1;TR26171_c6_g1;TR26634_c0_g1;TR26856_c0_g1;TR29313_c1_g1;TR30054_c0_g1;TR3119_c0_g1;TR31831_c0_g1;TR3198_c0_g1;TR32276_c9_g8;TR32737_c0_g1;TR32885_c0_g1;TR35363_c0_g1;TR36036_c0_g2;TR36458_c0_g1;TR36523_c0_g1;TR40098_c0_g1;TR41573_c0_g1;TR41839_c0_g1;TR41839_c0_g2;TR45892_c1_g1;TR47854_c0_g1;TR48728_c…	K00237+K00030+K01681+K00236+K01900+K00382+K01596+K00235+K01596+K00031+K01647+K01958+K00030+K00031+K13997+K00026+K01900+K00658+K00025+K00234+K00236+K01899+K01679+K00162+K00627+K00627+K00030+K00025+K00164+K01681+K01648+K01647+K01676+K01596
Pentose phosphate pathway	ko00030	21	TR12046_c1_g1;TR13057_c0_g1;TR20773_c2_g1;TR23274_c0_g1;TR23426_c0_g1;TR23426_c0_g2;TR23466_c0_g1;TR25695_c0_g1;TR26703_c2_g2;TR3015_c0_g1;TR31952_c0_g1;TR35401_c0_g1;TR39396_c0_g1;TR40287_c2_g1;TR43432_c0_g1;TR43432_c0_g2;TR45615_c0_g1;TR48736_c0_g1;TR54013_c4_g1;TR55138_c3_g1;TR7509_c0_g1;	K01619+K00615+K01835+K01835+K01783+K01783+K01057+K01807+K01810+K00033+K00850+K00852+K01623+K00036+K03841+K03841+K01623+K00948+K00616+K13937+K01623
Pentose and glucuronate interconversions	ko00040	30	TR10624_c4_g1;TR11482_c0_g1;TR14431_c0_g1;TR21834_c0_g1;TR23272_c0_g1;TR23272_c0_g2;TR23272_c0_g3;TR23426_c0_g1;TR23426_c0_g2;TR2663_c0_g1;TR29786_c1_g5;TR32855_c0_g1;TR34621_c0_g1;TR36203_c0_g1;TR36945_c0_g1;TR38604_c1_g1;TR40058_c1_g1;TR40058_c1_g2;TR43122_c0_g1;TR43787_c0_g1;TR46743_c0_g1;TR49173_c0_g1;TR51748_c5_g1;TR54378_c2_g1;TR54378_c2_g2;TR55488_c0_g1;TR57549_c0_g1;TR58955_c1_g1;TR8163_c…	K03331+K13247+K00854+K01195+K00128+K00128+K00128+K01783+K01783+K00012+K00011+K00854+K00011+K00963+K13247+K00854+K03331+K03331+K03331+K01805+K03331+K00854+K00128+K00128+K00128+K00128+K00012+K00854+K13247+K00078
Fructose and mannose metabolism	ko00051	36	TR10634_c0_g1;TR10667_c0_g1;TR12819_c0_g1;TR13151_c0_g1;TR18809_c0_g1;TR19836_c1_g1;TR19836_c1_g2;TR21749_c0_g1;TR23909_c0_g1;TR23909_c0_g2;TR23909_c0_g3;TR24011_c0_g1;TR25100_c5_g1;TR25877_c0_g1;TR29786_c1_g5;TR3048_c2_g1;TR31952_c0_g1;TR32285_c0_g1;TR34621_c0_g1;TR36627_c0_g1;TR37269_c0_g1;TR38399_c0_g1;TR38399_c0_g2;TR38469_c2_g1;TR39396_c0_g1;TR40708_c0_g1;TR43155_c1_g1;TR43432_c0_g1;TR43432_…	K00976+K00844+K00844+K05305+K00844+K00844+K00844+K02377+K01840+K01840+K01840+K00008+K00844+K00008+K00011+K00966+K00850+K05305+K00011+K05305+K01809+K00846+K00846+K01103+K01623+K14634+K00966+K03841+K03841+K01805+K01623+K00008+K00008+K01711+K01803+K01623
Galactose metabolism	ko00052	37	TR10667_c0_g1;TR12819_c0_g1;TR14241_c0_g1;TR15519_c0_g1;TR18809_c0_g1;TR19097_c1_g1;TR19836_c1_g1;TR19836_c1_g2;TR20693_c0_g1;TR20773_c2_g1;TR21358_c0_g2;TR23274_c0_g1;TR25100_c5_g1;TR26383_c0_g1;TR27396_c0_g1;TR28028_c0_g1;TR29290_c2_g2;TR29786_c1_g5;TR31912_c6_g1;TR31912_c6_g2;TR31952_c0_g1;TR34621_c0_g1;TR35266_c0_g2;TR35266_c1_g1;TR35277_c0_g1;TR36203_c0_g1;TR36226_c0_g1;TR36226_c0_g2;TR36226…	K00844+K00844+K01229+K01784+K00844+K01189+K00844+K00844+K00849+K01835+K01229+K01835+K00844+K12316+K01784+K01784+K01229+K00011+K12316+K12316+K00850+K00011+K12047+K01187+K12047+K00963+K12316+K12316+K12316+K01189+K00965+K12309+K12047+K01229+K00849+K00849+K12047
Ascorbate and aldarate metabolism	ko00053	12	TR23272_c0_g1;TR23272_c0_g2;TR23272_c0_g3;TR2663_c0_g1;TR29297_c0_g1;TR29861_c0_g1;TR39444_c0_g1;TR51748_c5_g1;TR54378_c2_g1;TR54378_c2_g2;TR55488_c0_g1;TR57549_c0_g1;	K00128+K00128+K00128+K00012+K00149+K14085+K00469+K00128+K00128+K00128+K00128+K00012
Fatty acid biosynthesis	ko00061	12	TR12314_c0_g1;TR15935_c0_g1;TR15935_c1_g1;TR15935_c2_g1;TR22673_c0_g1;TR22673_c0_g2;TR23903_c0_g1;TR25493_c9_g1;TR38504_c2_g1;TR4053_c0_g1;TR7474_c1_g1;TR7474_c3_g1;	K11262+K00665+K00665+K00665+K00645+K00645+K01071+K09458+K00665+K00665+K11262+K11262
Fatty acid elongation in mitochondria	ko00062	9	TR1604_c0_g1;TR17618_c0_g1;TR20168_c0_g1;TR25123_c0_g1;TR25487_c1_g1;TR37491_c0_g1;TR40286_c0_g1;TR46195_c0_g1;TR50200_c0_g1;	K00022+K01074+K07508+K01074+K07509+K07511+K07515+K07512+K01074
Fatty acid metabolism	ko00071	49	TR1604_c0_g1;TR16395_c0_g1;TR17974_c0_g1;TR17974_c0_g2;TR20168_c0_g1;TR22548_c0_g1;TR22822_c0_g1;TR22822_c0_g2;TR23272_c0_g1;TR23272_c0_g2;TR23272_c0_g3;TR23496_c0_g1;TR23651_c0_g1;TR23760_c0_g1;TR25487_c1_g1;TR25496_c1_g2;TR25835_c8_g2;TR25858_c0_g1;TR29297_c0_g1;TR29861_c0_g1;TR29870_c8_g1;TR30112_c0_g1;TR30139_c0_g1;TR32442_c0_g1;TR32802_c4_g1;TR32859_c2_g1;TR33678_c0_g1;TR36034_c0_g1;TR37491_…	K00022+K00121+K01897+K01897+K07508+K13238+K00248+K00248+K00128+K00128+K00128+K07425+K00232+K00232+K07509+K07425+K00249+K07514+K00149+K14085+K07513+K09479+K00232+K01897+K08765+K00626+K01897+K01897+K07511+K08765+K07515+K00252+K09478+K01897+K01897+K00121+K00121+K00255+K08766+K00128+K01692+K01897+K00128+K00128+K00128+K13239+K01897+K00232+K08765
Synthesis and degradation of ketone bodies	ko00072	15	TR12946_c0_g1;TR2960_c0_g1;TR32859_c2_g1;TR34266_c0_g1;TR36833_c0_g1;TR38494_c1_g1;TR3926_c0_g1;TR46140_c0_g1;TR47910_c1_g1;TR50488_c0_g1;TR52518_c0_g1;TR55664_c0_g1;TR56685_c0_g1;TR57383_c0_g1;TR7116_c0_g1;	K01640+K00019+K00626+K01641+K00019+K01027+K00019+K00019+K00019+K00019+K00019+K00019+K00019+K00019+K00019
Steroid biosynthesis	ko00100	19	TR15847_c0_g1;TR19636_c0_g1;TR20051_c0_g1;TR23718_c3_g2;TR25737_c0_g1;TR30995_c0_g1;TR30995_c0_g2;TR3806_c0_g1;TR3806_c1_g1;TR40380_c1_g1;TR44732_c0_g1;TR44732_c1_g1;TR46735_c0_g1;TR500_c0_g1;TR51653_c0_g1;TR52333_c0_g1;TR54736_c0_g1;TR55470_c0_g1;TR6561_c0_g1;	K09828+K00637+K09828+K07750+K12298+K13373+K13373+K12298+K12298+K00213+K00222+K00222+K01824+K07438+K12298+K12298+K00637+K00227+K07750
Primary bile acid biosynthesis	ko00120	6	TR10942_c0_g1;TR23267_c1_g2;TR23722_c0_g1;TR42555_c0_g1;TR42555_c1_g1;TR42555_c2_g1;	K07439+K00659+K12405+K00489+K07430+K07431
Ubiquinone and other terpenoid-quinone biosynthesis	ko00130	11	TR10444_c1_g1;TR10444_c1_g2;TR10669_c7_g1;TR27763_c0_g1;TR31286_c0_g1;TR34865_c0_g1;TR39399_c0_g1;TR41261_c0_g1;TR44892_c0_g1;TR57447_c2_g10;TR57447_c2_g2;	K00457+K00457+K06126+K00591+K00815+K00815+K06125+K01904+K06134+K06127+K06127
Steroid hormone biosynthesis	ko00140	20	TR1293_c0_g1;TR18019_c0_g1;TR20249_c2_g1;TR20804_c1_g1;TR22282_c0_g1;TR26798_c1_g1;TR27383_c0_g1;TR30995_c0_g1;TR30995_c0_g2;TR3204_c0_g1;TR40233_c0_g1;TR42555_c0_g1;TR42555_c1_g1;TR43733_c0_g1;TR45839_c1_g1;TR45839_c1_g2;TR48399_c0_g1;TR53771_c0_g1;TR9749_c5_g1;TR9749_c6_g1;	K07424+K07424+K07424+K07424+K07424+K07424+K07424+K13373+K13373+K07424+K00071+K00489+K07430+K07424+K13370+K13370+K00071+K01016+K07424+K07424
Oxidative phosphorylation	ko00190	112	TR10090_c0_g1;TR1150_c0_g1;TR11902_c0_g1;TR12021_c0_g1;TR12245_c0_g1;TR12473_c0_g1;TR13413_c0_g1;TR13838_c0_g1;TR1423_c0_g1;TR14494_c0_g1;TR15000_c0_g1;TR1560_c0_g1;TR15698_c0_g1;TR16263_c1_g1;TR16384_c1_g1;TR17326_c1_g1;TR17346_c2_g1;TR17548_c0_g1;TR18848_c0_g1;TR20095_c0_g1;TR20142_c0_g1;TR20929_c0_g1;TR20933_c0_g1;TR21420_c0_g1;TR22825_c0_g1;TR23458_c0_g1;TR24714_c0_g1;TR24714_c1_g1;TR25871_c1…	K00237+K11353+K02265+K02154+K02138+K11725+K02127+K00418+K03952+K02131+K02262+K02267+K00236+K03879+K00412+K03942+K02137+K02263+K03935+K02259+K02132+K03949+K00411+K02149+K03662+K02145+K03883+K02262+K03950+K00235+K03885+K03885+K03885+K03940+K03938+K03946+K03936+K02147+K03959+K03937+K03954+K02133+K03939+K03939+K02132+K02152+K03879+K02154+K02154+K03965+K01507+K03953+K02256+K02256+K00412+K02272+K03941+…
Purine metabolism	ko00230	193	TR1023_c0_g1;TR1023_c0_g2;TR1023_c0_g3;TR10247_c0_g1;TR10421_c4_g1;TR10430_c0_g2;TR10615_c1_g1;TR10664_c0_g1;TR11048_c0_g1;TR11841_c0_g1;TR11841_c0_g2;TR11894_c0_g1;TR12177_c0_g1;TR13733_c0_g1;TR14657_c1_g1;TR14770_c0_g1;TR14770_c0_g2;TR15506_c0_g1;TR1552_c0_g1;TR15828_c0_g1;TR16005_c0_g1;TR1662_c0_g1;TR16758_c0_g1;TR16758_c0_g2;TR18541_c0_g1;TR20289_c0_g1;TR20356_c0_g1;TR20560_c0_g1;TR20562_c0_g…	K01514+K01514+K01514+K12304+K01081+K00760+K03015+K00942+K00759+K08049+K08049+K00962+K03023+K01120+K00365+K13987+K13987+K01951+K00106+K01488+K03024+K01513+K03014+K03014+K01120+K00942+K12323+K02328+K08049+K08049+K01081+K03017+K03026+K00939+K01835+K13755+K01488+K01488+K01835+K13298+K00939+K03002+K12323+K03018+K12319+K03022+K14721+K01513+K12318+K01487+K01487+K01081+K03506+K02684+K02326+K12323+K01587+…
Caffeine metabolism	ko00232	12	TR14657_c1_g1;TR1552_c0_g1;TR35350_c1_g1;TR35350_c1_g2;TR35350_c1_g3;TR36455_c0_g1;TR36455_c0_g2;TR36455_c1_g1;TR36455_c1_g2;TR40091_c0_g1;TR40091_c0_g2;TR57635_c0_g1;	K00365+K00106+K00106+K00106+K00106+K00106+K00106+K00106+K00106+K00106+K00106+K00106
Pyrimidine metabolism	ko00240	105	TR10247_c0_g1;TR10421_c4_g1;TR10566_c2_g1;TR10615_c1_g1;TR11894_c0_g1;TR12177_c0_g1;TR14452_c1_g1;TR16005_c0_g1;TR16156_c0_g1;TR16758_c0_g1;TR16758_c0_g2;TR20560_c0_g1;TR20660_c0_g1;TR20715_c0_g1;TR20726_c0_g1;TR21346_c3_g1;TR21778_c0_g1;TR23846_c0_g2;TR23919_c0_g1;TR25115_c0_g1;TR25437_c0_g1;TR25648_c0_g1;TR26200_c3_g3;TR26249_c0_g1;TR26531_c0_g1;TR26618_c1_g2;TR26655_c0_g1;TR26659_c5_g1;TR28310…	K12304+K01081+K00757+K03015+K00962+K03023+K01520+K03024+K13809+K03014+K03014+K02328+K01081+K03017+K03026+K01493+K00254+K03002+K03018+K13800+K03022+K14721+K00761+K01464+K01081+K03506+K02684+K02326+K00943+K03025+K03007+K01489+K03002+K00944+K00757+K00757+K01511+K02999+K01937+K03012+K00857+K00560+K03002+K02999+K14721+K03010+K03008+K01510+K01518+K00876+K03016+K01431+K03021+K00940+K00940+K03000+K03002+…
Alanine, aspartate and glutamate metabolism	ko00250	43	TR10183_c0_g1;TR10413_c0_g1;TR18841_c0_g1;TR20321_c0_g1;TR21836_c0_g1;TR2188_c0_g1;TR2519_c0_g1;TR25497_c1_g1;TR25632_c0_g1;TR25632_c1_g1;TR26462_c0_g1;TR30903_c0_g1;TR30903_c0_g2;TR31561_c0_g1;TR32787_c0_g1;TR35752_c0_g1;TR36054_c0_g1;TR36054_c0_g2;TR36054_c0_g3;TR36314_c0_g1;TR36314_c0_g2;TR39287_c0_g1;TR40217_c8_g1;TR41568_c1_g1;TR42799_c0_g1;TR43719_c0_g1;TR45380_c1_g1;TR45865_c0_g1;TR48658_c…	K01915+K03334+K00272+K01425+K01915+K13524+K00827+K14454+K00814+K00814+K03334+K03334+K03334+K01915+K13524+K01915+K00264+K00264+K00264+K03334+K03334+K14455+K00261+K01939+K01940+K00830+K01756+K01915+K01953+K01915+K11540+K00764+K01940+K01425+K00820+K01755+K01915+K00294+K11540+K13566+K00139+K00272+K13566
Glycine, serine and threonine metabolism	ko00260	36	TR10504_c0_g1;TR10504_c0_g2;TR12265_c0_g1;TR16774_c0_g1;TR17625_c0_g1;TR17625_c1_g1;TR17964_c1_g1;TR20237_c0_g1;TR20803_c0_g1;TR21384_c1_g1;TR21764_c0_g1;TR22242_c0_g1;TR22242_c0_g2;TR23412_c0_g1;TR23460_c3_g1;TR2519_c0_g1;TR29270_c1_g1;TR29516_c0_g1;TR29516_c0_g2;TR29516_c0_g3;TR29680_c0_g1;TR29861_c0_g1;TR36241_c0_g4;TR38647_c0_g1;TR39108_c0_g2;TR39802_c0_g1;TR43196_c0_g1;TR43719_c0_g1;TR4512_c…	K12235+K12235+K00273+K01620+K12235+K12235+K00306+K01754+K01697+K00281+K00276+K01754+K01754+K00276+K00382+K00827+K00643+K00865+K00865+K00865+K01754+K14085+K12235+K01758+K00274+K00831+K00605+K00830+K00273+K00274+K01079+K00600+K00276+K00600+K00058+K00639
Cysteine and methionine metabolism	ko00270	46	TR10413_c0_g1;TR12463_c0_g2;TR15052_c0_g1;TR20803_c0_g1;TR22293_c0_g1;TR22387_c0_g1;TR23903_c1_g1;TR23917_c1_g1;TR24297_c0_g1;TR24615_c0_g1;TR25346_c0_g1;TR25497_c1_g1;TR25833_c0_g1;TR26462_c0_g1;TR29820_c0_g1;TR29883_c0_g1;TR3022_c0_g1;TR30808_c0_g1;TR30903_c0_g1;TR30903_c0_g2;TR31286_c0_g1;TR32190_c2_g1;TR32770_c0_g1;TR32794_c0_g1;TR33269_c2_g3;TR34150_c0_g1;TR34865_c0_g1;TR36314_c0_g1;TR36314_…	K03334+K09880+K00789+K01697+K01738+K00456+K08964+K00772+K08967+K01011+K00456+K14454+K00641+K03334+K08963+K00558+K09880+K08964+K03334+K03334+K00815+K00789+K01011+K01251+K00789+K09880+K00815+K03334+K03334+K01011+K01758+K14455+K01611+K00558+K00558+K00558+K00797+K01251+K00548+K00548+K01011+K01011+K09880+K00789+K00547+K00558
Valine, leucine and isoleucine degradation	ko00280	56	TR10413_c0_g1;TR11562_c0_g1;TR12946_c0_g1;TR1604_c0_g1;TR18895_c0_g1;TR20168_c0_g1;TR2188_c0_g1;TR22218_c0_g1;TR22218_c1_g1;TR22542_c0_g1;TR22822_c0_g1;TR22822_c0_g2;TR23272_c0_g1;TR23272_c0_g2;TR23272_c0_g3;TR23460_c3_g1;TR25487_c1_g1;TR25835_c8_g2;TR25858_c0_g1;TR25867_c0_g1;TR26462_c0_g1;TR29281_c0_g1;TR29297_c0_g1;TR29848_c0_g1;TR29861_c0_g1;TR29870_c8_g1;TR30115_c2_g1;TR30903_c0_g1;TR30903_c…	K03334+K00253+K01640+K00022+K00020+K07508+K13524+K05605+K05605+K08683+K00248+K00248+K00128+K00128+K00128+K00382+K07509+K00249+K07514+K01968+K03334+K01969+K00149+K05606+K14085+K07513+K01847+K03334+K03334+K13524+K00626+K01641+K00166+K00166+K00166+K00166+K05607+K03334+K03334+K00826+K07511+K11538+K01027+K09699+K07515+K09478+K01965+K01966+K00128+K01692+K00140+K00128+K00128+K00128+K00253+K00167
Valine, leucine and isoleucine biosynthesis	ko00290	16	TR20237_c0_g1;TR20731_c0_g1;TR20731_c0_g2;TR22242_c0_g1;TR22242_c0_g2;TR29680_c0_g1;TR35317_c0_g1;TR36490_c0_g1;TR38737_c0_g1;TR38737_c1_g1;TR38737_c2_g1;TR41344_c0_g1;TR41573_c0_g1;TR48701_c0_g2;TR55110_c1_g1;TR58464_c0_g1;	K01754+K01870+K01870+K01754+K01754+K01754+K01873+K00826+K01870+K01870+K01870+K01869+K00162+K01873+K01869+K01869
Lysine biosynthesis	ko00300	5	TR23786_c11_g1;TR23905_c2_g1;TR29861_c0_g1;TR47181_c0_g1;TR56735_c0_g1;	K00825+K14157+K14085+K00825+K01586
Lysine degradation	ko00310	44	TR12405_c0_g1;TR14703_c0_g1;TR1604_c0_g1;TR16157_c0_g1;TR17127_c0_g1;TR17964_c1_g1;TR20232_c0_g1;TR23272_c0_g1;TR23272_c0_g2;TR23272_c0_g3;TR23786_c11_g1;TR23905_c2_g1;TR23928_c1_g1;TR25858_c0_g1;TR2599_c0_g1;TR29297_c0_g1;TR29861_c0_g1;TR31348_c0_g1;TR32859_c2_g1;TR32885_c0_g1;TR36014_c0_g1;TR37077_c0_g1;TR37077_c0_g2;TR37491_c0_g1;TR39237_c0_g1;TR40286_c0_g1;TR45826_c0_g1;TR47181_c0_g1;TR47197_…	K11428+K06101+K00022+K11422+K11428+K00306+K11422+K00128+K00128+K00128+K00825+K14157+K11423+K07514+K13646+K00149+K14085+K11422+K00626+K00658+K11428+K13645+K13645+K07511+K11424+K07515+K00252+K00825+K11423+K11428+K00164+K11419+K11419+K00128+K11420+K01692+K00128+K00128+K11427+K11427+K00128+K11429+K11421+K11428
Arginine and proline metabolism	ko00330	65	TR10183_c0_g1;TR12265_c0_g1;TR1575_c0_g1;TR18371_c0_g2;TR18376_c0_g1;TR18609_c0_g1;TR19848_c0_g1;TR20321_c0_g1;TR21836_c0_g1;TR22470_c0_g1;TR23272_c0_g1;TR23272_c0_g2;TR23272_c0_g3;TR2494_c0_g1;TR25497_c1_g1;TR26176_c0_g1;TR27170_c0_g1;TR27170_c0_g2;TR28047_c0_g1;TR29297_c0_g1;TR29861_c0_g1;TR3031_c0_g1;TR30356_c0_g1;TR30356_c0_g2;TR30356_c1_g1;TR31561_c0_g1;TR33243_c0_g1;TR33780_c0_g1;TR35752_c0…	K01915+K00273+K01581+K00286+K00472+K00472+K00657+K01425+K01915+K11142+K00128+K00128+K00128+K14677+K14454+K14677+K01480+K01480+K01476+K00149+K14085+K00318+K01427+K01427+K01427+K01915+K01476+K00472+K01915+K13253+K00819+K00274+K14455+K01611+K00261+K00472+K01940+K00273+K01915+K00286+K00472+K11182+K12657+K12657+K01915+K00797+K11182+K01940+K00128+K00274+K01476+K01425+K13253+K01755+K11182+K00128+K00128+…
Histidine metabolism	ko00340	24	TR10155_c0_g1;TR23272_c0_g1;TR23272_c0_g2;TR23272_c0_g3;TR23491_c0_g1;TR25518_c0_g1;TR2573_c0_g1;TR28696_c0_g1;TR29297_c0_g1;TR29861_c0_g1;TR36026_c6_g1;TR39108_c0_g2;TR42534_c0_g1;TR48123_c1_g4;TR49581_c0_g1;TR5130_c0_g1;TR51748_c5_g1;TR51790_c0_g1;TR54216_c0_g1;TR54378_c2_g1;TR54378_c2_g2;TR55488_c0_g1;TR58204_c0_g1;TR58204_c0_g2;	K01468+K00128+K00128+K00128+K01745+K01712+K01593+K00599+K00149+K14085+K13990+K00274+K01745+K11182+K11182+K00599+K00128+K00274+K11182+K00128+K00128+K00128+K00599+K00599
Tyrosine metabolism	ko00350	33	TR10413_c0_g1;TR10444_c1_g1;TR10444_c1_g2;TR16395_c0_g1;TR20789_c19_g6;TR21764_c0_g1;TR23412_c0_g1;TR25497_c1_g1;TR2573_c0_g1;TR26462_c0_g1;TR28696_c0_g1;TR30106_c0_g1;TR30903_c0_g1;TR30903_c0_g2;TR31286_c0_g1;TR34865_c0_g1;TR35958_c0_g1;TR36314_c0_g1;TR36314_c0_g2;TR37990_c0_g1;TR39108_c0_g2;TR39287_c0_g1;TR49052_c1_g1;TR49057_c0_g1;TR50107_c0_g1;TR5130_c0_g1;TR51790_c0_g1;TR58204_c0_g1;TR58204_…	K03334+K00457+K00457+K00121+K07253+K00276+K00276+K14454+K01593+K03334+K00599+K01555+K03334+K03334+K00815+K00815+K00451+K03334+K03334+K00503+K00274+K14455+K00121+K01800+K00121+K00599+K00274+K00599+K00599+K00276+K00505+K00503+K00501
Phenylalanine metabolism	ko00360	23	TR10413_c0_g1;TR10444_c1_g1;TR10444_c1_g2;TR18853_c0_g1;TR20789_c19_g6;TR21764_c0_g1;TR23412_c0_g1;TR25497_c1_g1;TR2573_c0_g1;TR26462_c0_g1;TR28303_c0_g1;TR30903_c0_g1;TR30903_c0_g2;TR31286_c0_g1;TR34865_c0_g1;TR36314_c0_g1;TR36314_c0_g2;TR39108_c0_g2;TR39287_c0_g1;TR41261_c0_g1;TR51790_c0_g1;TR58384_c1_g1;TR9022_c5_g4;	K03334+K00457+K00457+K00500+K07253+K00276+K00276+K14454+K01593+K03334+K11188+K03334+K03334+K00815+K00815+K03334+K03334+K00274+K14455+K01904+K00274+K00276+K01426
Tryptophan metabolism	ko00380	47	TR10413_c0_g1;TR15132_c0_g2;TR1604_c0_g1;TR23272_c0_g1;TR23272_c0_g2;TR23272_c0_g3;TR23786_c11_g1;TR25079_c0_g1;TR25468_c0_g1;TR2573_c0_g1;TR25858_c0_g1;TR26462_c0_g1;TR2771_c0_g1;TR29297_c0_g1;TR29861_c0_g1;TR30089_c1_g1;TR30903_c0_g1;TR30903_c0_g2;TR32194_c0_g1;TR32859_c2_g1;TR33394_c4_g1;TR35041_c0_g1;TR35210_c0_g1;TR36314_c0_g1;TR36314_c0_g2;TR37491_c0_g1;TR39108_c0_g2;TR40286_c0_g1;TR40386_c…	K03334+K01867+K00022+K00128+K00128+K00128+K00825+K07408+K00452+K01593+K07514+K03334+K00453+K00149+K14085+K03781+K03334+K03334+K00816+K00626+K03392+K01867+K01556+K03334+K03334+K07511+K00274+K07515+K00486+K00252+K01432+K00825+K00463+K00463+K11182+K00502+K00164+K11182+K00486+K00128+K00274+K01692+K11182+K00128+K00128+K00128+K01426
Phenylalanine, tyrosine and tryptophan biosynthesis	ko00400	11	TR10413_c0_g1;TR18853_c0_g1;TR25497_c1_g1;TR26462_c0_g1;TR30903_c0_g1;TR30903_c0_g2;TR31286_c0_g1;TR34865_c0_g1;TR36314_c0_g1;TR36314_c0_g2;TR39287_c0_g1;	K03334+K00500+K14454+K03334+K03334+K03334+K00815+K00815+K03334+K03334+K14455
beta-Alanine metabolism	ko00410	26	TR10458_c1_g1;TR21764_c0_g1;TR2188_c0_g1;TR22218_c0_g1;TR22218_c1_g1;TR23272_c0_g1;TR23272_c0_g2;TR23272_c0_g3;TR23412_c0_g1;TR25835_c8_g2;TR25858_c0_g1;TR26249_c0_g1;TR29297_c0_g1;TR29861_c0_g1;TR32787_c0_g1;TR37491_c0_g1;TR38453_c1_g1;TR40286_c0_g1;TR48906_c0_g1;TR51748_c5_g1;TR52522_c0_g1;TR54378_c2_g1;TR54378_c2_g2;TR55488_c0_g1;TR58384_c1_g1;TR8190_c0_g1;	K01578+K00276+K13524+K05605+K05605+K00128+K00128+K00128+K00276+K00249+K07514+K01464+K00149+K14085+K13524+K07511+K01431+K07515+K00797+K00128+K01692+K00128+K00128+K00128+K00276+K00207
Taurine and hypotaurine metabolism	ko00430	15	TR10944_c0_g1;TR12104_c0_g1;TR22387_c0_g1;TR23267_c1_g2;TR25346_c0_g1;TR32150_c0_g1;TR35322_c0_g1;TR45003_c0_g1;TR4517_c0_g1;TR46994_c0_g1;TR49932_c0_g1;TR5019_c0_g1;TR53170_c1_g1;TR54288_c0_g1;TR57118_c0_g1;	K10712+K00681+K00456+K00659+K00456+K01594+K00681+K00681+K01594+K01594+K00681+K00681+K00681+K10712+K00681
Selenocompound metabolism	ko00450	12	TR26611_c0_g1;TR26673_c0_g1;TR29925_c0_g1;TR32194_c0_g1;TR3325_c1_g2;TR38647_c0_g1;TR48626_c0_g1;TR5090_c0_g1;TR52440_c0_g1;TR5248_c0_g1;TR5248_c1_g1;TR8302_c0_g1;	K01763+K01008+K13811+K00816+K01874+K01758+K00384+K01874+K10837+K00548+K00548+K03341
Cyanoamino acid metabolism	ko00460	10	TR12104_c0_g1;TR35322_c0_g1;TR45003_c0_g1;TR49932_c0_g1;TR5019_c0_g1;TR53170_c1_g1;TR57118_c0_g1;TR5834_c0_g1;TR7256_c4_g1;TR9022_c5_g4;	K00681+K00681+K00681+K00681+K00681+K00681+K00681+K00600+K00600+K01426
D-Glutamine and D-glutamate metabolism	ko00471	2	TR20321_c0_g1;TR52362_c0_g1;	K01425+K01425
D-Arginine and D-ornithine metabolism	ko00472	2	TR12265_c0_g1;TR4512_c0_g1;	K00273+K00273
Glutathione metabolism	ko00480	67	TR10323_c0_g1;TR10545_c0_g1;TR1097_c0_g3;TR12104_c0_g1;TR12474_c0_g1;TR12474_c0_g2;TR13787_c0_g1;TR14021_c0_g1;TR14223_c0_g1;TR15276_c0_g1;TR15354_c0_g1;TR15665_c0_g1;TR1575_c0_g1;TR18368_c0_g1;TR22470_c0_g1;TR23284_c1_g1;TR23284_c1_g2;TR25358_c0_g1;TR25358_c0_g2;TR26322_c0_g1;TR26322_c0_g2;TR26856_c0_g1;TR26929_c0_g1;TR27901_c0_g1;TR27901_c0_g2;TR28627_c0_g2;TR287_c0_g1;TR29265_c3_g4;TR29265_c3_…	K11205+K00383+K00799+K00681+K01920+K01920+K01469+K01920+K11140+K00799+K00432+K00799+K01581+K00799+K11142+K00432+K00432+K00799+K00799+K00432+K00432+K00031+K00432+K00799+K00799+K00432+K05360+K00432+K00432+K01469+K00033+K00031+K11140+K00432+K11140+K00681+K11140+K00799+K11204+K00799+K00799+K00036+K00799+K01255+K00799+K00799+K00681+K00799+K00432+K00797+K01920+K00681+K00681+K01469+K00799+K00799+K00799+…
Starch and sucrose metabolism	ko00500	43	TR10667_c0_g1;TR12819_c0_g1;TR14679_c0_g1;TR1662_c0_g1;TR17260_c1_g2;TR18809_c0_g1;TR19836_c1_g1;TR19836_c1_g2;TR20773_c2_g1;TR21834_c0_g1;TR23274_c0_g1;TR23488_c5_g1;TR23738_c0_g1;TR25100_c5_g1;TR25875_c2_g1;TR26383_c0_g1;TR2663_c0_g1;TR26703_c2_g2;TR2876_c0_g1;TR31875_c0_g1;TR31912_c6_g1;TR31912_c6_g2;TR35266_c0_g2;TR35266_c1_g1;TR35277_c0_g1;TR36193_c0_g1;TR36193_c0_g2;TR36203_c0_g1;TR36226_c0…	K00844+K00844+K01194+K01513+K00688+K00844+K00844+K00844+K01835+K01195+K01835+K00700+K01196+K00844+K01513+K12316+K00012+K01810+K01513+K01176+K12316+K12316+K12047+K01187+K12047+K01176+K01176+K00963+K12316+K12316+K12316+K01513+K00697+K12047+K01513+K01176+K01513+K00012+K00693+K12047+K01513+K01513+K01513
N-Glycan biosynthesis	ko00510	75	TR10093_c0_g1;TR11004_c0_g1;TR11425_c0_g1;TR11425_c0_g2;TR12838_c0_g1;TR14247_c0_g1;TR15395_c0_g1;TR15921_c0_g1;TR16548_c0_g1;TR19829_c0_g1;TR19829_c1_g1;TR20299_c0_g1;TR2085_c0_g1;TR21301_c0_g1;TR2211_c0_g1;TR22547_c0_g1;TR22692_c0_g1;TR23910_c0_g4;TR2405_c0_g1;TR25266_c0_g1;TR25579_c0_g1;TR25655_c0_g1;TR25655_c0_g2;TR25814_c0_g1;TR26208_c10_g10;TR26208_c10_g11;TR26208_c10_g2;TR26208_c10_g4;TR26…	K01231+K01001+K07252+K07252+K03844+K12668+K00717+K01231+K00717+K01231+K01231+K00717+K00736+K13748+K03848+K00717+K01231+K07432+K01231+K05546+K01231+K03850+K03850+K01231+K12667+K12667+K12667+K12667+K12667+K12667+K12667+K12667+K12669+K00729+K00902+K01231+K00717+K07151+K13748+K01231+K07151+K00721+K00726+K06316+K00744+K00738+K12666+K12670+K01231+K03845+K01228+K01228+K00744+K03842+K07441+K01231+K00744+…
Other glycan degradation	ko00511	36	TR13363_c0_g1;TR14365_c1_g1;TR15198_c0_g1;TR18960_c0_g1;TR27980_c0_g1;TR27980_c0_g2;TR29885_c0_g1;TR29994_c0_g1;TR32218_c1_g1;TR351_c0_g1;TR35724_c0_g1;TR35905_c0_g1;TR37604_c0_g1;TR37635_c1_g1;TR37635_c1_g2;TR37635_c1_g3;TR38262_c2_g1;TR38262_c2_g4;TR38272_c0_g1;TR39138_c0_g1;TR41848_c0_g1;TR44207_c0_g1;TR44804_c0_g1;TR44915_c0_g1;TR48019_c0_g1;TR48019_c0_g2;TR49058_c0_g1;TR49498_c0_g1;TR50360_c…	K12373+K12373+K14459+K01191+K01206+K01206+K01201+K12373+K01444+K01192+K01227+K12373+K12373+K12373+K12373+K12373+K01201+K01201+K12373+K01191+K12373+K12373+K12309+K12373+K12373+K12373+K01192+K12373+K01191+K01201+K01201+K14459+K01206+K12373+K12311+K01201
Mucin type O-Glycan biosynthesis	ko00512	20	TR10312_c0_g1;TR16818_c0_g1;TR16844_c0_g1;TR2253_c0_g1;TR25462_c0_g1;TR2560_c0_g1;TR2560_c0_g2;TR2684_c0_g1;TR26978_c0_g1;TR27657_c0_g1;TR28347_c0_g1;TR39518_c0_g1;TR4469_c1_g1;TR45571_c0_g1;TR47625_c0_g1;TR51240_c0_g1;TR51546_c0_g1;TR51681_c0_g1;TR51681_c1_g1;TR54650_c1_g1;	K00710+K00710+K00710+K00710+K00710+K00710+K00710+K00727+K00710+K00731+K00710+K00731+K00710+K00731+K00727+K00710+K00731+K00710+K00710+K00710
Other types of O-glycan biosynthesis	ko00514	21	TR14406_c0_g1;TR14406_c1_g1;TR14406_c1_g2;TR14669_c1_g1;TR17662_c0_g1;TR21190_c0_g1;TR22477_c0_g1;TR23465_c0_g1;TR2599_c0_g1;TR27869_c0_g1;TR27869_c0_g2;TR28625_c0_g1;TR36535_c0_g1;TR36535_c0_g2;TR39346_c0_g1;TR41088_c0_g1;TR48625_c1_g1;TR52017_c1_g1;TR55114_c0_g1;TR55400_c0_g1;TR55400_c1_g1;	K13675+K13675+K13675+K03691+K09666+K09666+K03691+K13676+K13646+K05948+K05948+K09666+K13667+K13667+K00728+K09666+K09667+K09666+K03691+K00728+K00728
Amino sugar and nucleotide sugar metabolism	ko00520	90	TR10634_c0_g1;TR10667_c0_g1;TR10701_c2_g2;TR11361_c0_g1;TR11361_c0_g2;TR12819_c0_g1;TR13151_c0_g1;TR13363_c0_g1;TR14365_c1_g1;TR15202_c0_g1;TR15519_c0_g1;TR18809_c0_g1;TR19836_c1_g1;TR19836_c1_g2;TR20693_c0_g1;TR20773_c2_g1;TR21657_c0_g1;TR21749_c0_g1;TR2205_c0_g1;TR23274_c0_g1;TR23314_c2_g2;TR23909_c0_g1;TR23909_c0_g2;TR23909_c0_g3;TR24821_c0_g1;TR25100_c5_g1;TR258_c0_g1;TR2663_c0_g1;TR26703_c2_…	K00976+K00844+K00326+K00698+K00698+K00844+K05305+K12373+K12373+K00326+K01784+K00844+K00844+K00844+K00849+K01835+K02564+K02377+K01183+K01835+K01183+K01840+K01840+K01840+K00698+K00844+K00698+K00012+K01810+K01639+K01784+K01784+K01443+K12373+K00966+K00698+K00698+K00698+K00698+K00972+K05305+K01183+K00698+K12373+K00963+K05305+K01809+K12373+K12373+K12373+K12373+K12373+K01183+K00884+K00965+K01183+K12373+…
Glycosaminoglycan degradation	ko00531	40	TR12450_c0_g1;TR12861_c0_g2;TR13363_c0_g1;TR14365_c1_g1;TR15089_c0_g1;TR15754_c0_g1;TR19074_c0_g1;TR21834_c0_g1;TR26005_c4_g1;TR26505_c0_g1;TR26526_c0_g1;TR26640_c0_g1;TR26776_c0_g1;TR27623_c0_g1;TR2956_c0_g1;TR29994_c0_g1;TR31969_c1_g1;TR32023_c0_g1;TR35336_c2_g2;TR35905_c0_g1;TR37604_c0_g1;TR37635_c1_g1;TR37635_c1_g2;TR37635_c1_g3;TR38272_c0_g1;TR40048_c0_g1;TR41039_c0_g1;TR41609_c0_g1;TR41848_…	K01137+K01205+K12373+K12373+K01136+K01197+K01136+K01195+K01136+K01135+K01565+K01132+K01136+K01565+K10532+K12373+K10532+K01136+K07964+K12373+K12373+K12373+K12373+K12373+K12373+K01136+K01136+K10532+K12373+K12373+K12309+K01217+K12373+K01565+K12373+K12373+K01565+K01565+K12373+K12373
Glycosaminoglycan biosynthesis - chondroitin sulfate	ko00532	25	TR10132_c0_g1;TR12461_c0_g1;TR15862_c0_g1;TR18979_c0_g1;TR18979_c0_g2;TR19086_c0_g1;TR19216_c0_g1;TR19216_c0_g2;TR20797_c0_g1;TR23733_c2_g1;TR23733_c2_g2;TR25134_c0_g1;TR30765_c0_g1;TR31971_c0_g1;TR38104_c0_g1;TR40029_c0_g1;TR44546_c0_g1;TR44546_c0_g2;TR44546_c0_g3;TR45474_c0_g1;TR48667_c0_g1;TR50560_c0_g1;TR53091_c0_g1;TR56935_c0_g1;TR6811_c0_g1;	K08106+K00734+K08106+K00771+K00771+K07779+K08106+K08106+K00733+K03419+K00747+K08106+K08106+K01017+K01017+K00746+K08105+K08105+K08105+K01017+K10158+K08106+K08106+K13499+K13499
Glycosaminoglycan biosynthesis - keratan sulfate	ko00533	9	TR15395_c0_g1;TR16548_c0_g1;TR20299_c0_g1;TR22547_c0_g1;TR34804_c0_g1;TR4216_c0_g1;TR4216_c0_g2;TR52931_c0_g1;TR55517_c0_g1;	K00717+K00717+K00717+K00717+K00717+K00741+K00741+K01022+K00717
Glycosaminoglycan biosynthesis - heparan sulfate	ko00534	18	TR10736_c0_g1;TR12461_c0_g1;TR17354_c0_g1;TR17914_c1_g1;TR17963_c0_g1;TR18979_c0_g1;TR18979_c0_g2;TR19671_c0_g1;TR20797_c0_g1;TR26208_c9_g1;TR26208_c9_g3;TR28311_c0_g1;TR29606_c0_g1;TR30267_c0_g1;TR30267_c0_g2;TR32468_c0_g1;TR48667_c0_g1;TR49541_c0_g1;	K02513+K00734+K02367+K02366+K02370+K00771+K00771+K02577+K00733+K07809+K07809+K01793+K08103+K02577+K02577+K01024+K10158+K02370
Glycerolipid metabolism	ko00561	58	TR12478_c0_g1;TR12478_c0_g2;TR12478_c1_g1;TR1385_c0_g1;TR14288_c0_g1;TR14288_c0_g2;TR17042_c0_g1;TR17342_c4_g4;TR17557_c0_g1;TR19097_c1_g1;TR21832_c0_g1;TR23272_c0_g1;TR23272_c0_g2;TR23272_c0_g3;TR25102_c0_g1;TR25102_c0_g2;TR25737_c0_g1;TR28137_c0_g1;TR28594_c0_g1;TR29297_c0_g1;TR29516_c0_g1;TR29516_c0_g2;TR29516_c0_g3;TR29786_c1_g5;TR29861_c0_g1;TR31811_c0_g1;TR31811_c1_g1;TR32161_c0_g1;TR32161_…	K00901+K00901+K00901+K00901+K13513+K13513+K13509+K01080+K11155+K01189+K00863+K00128+K00128+K00128+K09881+K09881+K12298+K01080+K01080+K00149+K00865+K00865+K00865+K00011+K14085+K00901+K00901+K00901+K00901+K14073+K01080+K00901+K00011+K13513+K12298+K12298+K01189+K00863+K00863+K13506+K01080+K00901+K00864+K01080+K12298+K00128+K12298+K13517+K00901+K00128+K00128+K00128+K01080+K01080+K13517+K13517+K13523+…
Inositol phosphate metabolism	ko00562	77	TR10159_c0_g1;TR11351_c0_g1;TR12885_c1_g1;TR14281_c0_g1;TR152_c0_g1;TR15748_c0_g1;TR15748_c1_g1;TR16803_c0_g2;TR22342_c0_g1;TR2309_c0_g1;TR23235_c0_g1;TR25165_c1_g1;TR25229_c0_g1;TR25229_c0_g2;TR25850_c0_g1;TR26532_c0_g1;TR29636_c0_g1;TR29817_c1_g1;TR30046_c1_g1;TR30309_c0_g1;TR31012_c0_g1;TR3107_c1_g1;TR31736_c0_g1;TR31736_c2_g1;TR32393_c0_g1;TR32393_c0_g2;TR33320_c0_g1;TR33328_c0_g1;TR33419_c0_…	K00911+K13711+K01099+K01099+K05857+K05860+K05860+K00999+K00921+K00922+K00010+K00888+K01099+K01099+K00922+K00911+K00921+K00923+K00921+K05860+K05860+K01106+K01106+K01106+K00921+K00921+K00010+K01771+K01109+K01109+K03103+K01110+K00469+K01110+K00888+K00888+K13711+K01106+K01106+K00922+K01106+K05859+K05859+K05859+K01771+K00922+K03103+K00914+K00140+K03103+K00922+K00913+K01092+K05858+K00914+K00010+K13712+…
Glycosylphosphatidylinositol(GPI)-anchor biosynthesis	ko00563	38	TR11005_c0_g1;TR11005_c0_g2;TR12526_c0_g1;TR15979_c0_g1;TR15979_c0_g2;TR16810_c0_g1;TR1885_c0_g1;TR1885_c0_g2;TR22259_c0_g1;TR22259_c1_g1;TR2248_c0_g1;TR23480_c0_g1;TR24622_c1_g1;TR26210_c0_g1;TR26232_c1_g1;TR29481_c1_g1;TR30132_c2_g1;TR30132_c3_g1;TR30132_c3_g5;TR3035_c0_g1;TR32188_c0_g1;TR32751_c0_g1;TR33319_c0_g1;TR38769_c0_g1;TR39289_c0_g1;TR39363_c1_g1;TR40496_c0_g1;TR40496_c0_g2;TR45579_c0_…	K05290+K05290+K01127+K05294+K05294+K03861+K05285+K05285+K05286+K05286+K05292+K05285+K03860+K05291+K05289+K03434+K05288+K05288+K05288+K05310+K05284+K08098+K05285+K01127+K01127+K03859+K05285+K05285+K05294+K05294+K05287+K05293+K05283+K05286+K03857+K07542+K07542+K07541
Glycerophospholipid metabolism	ko00564	84	TR12478_c0_g1;TR12478_c0_g2;TR12478_c1_g1;TR13438_c0_g1;TR1385_c0_g1;TR14288_c0_g1;TR14288_c0_g2;TR14502_c0_g1;TR15614_c0_g1;TR16803_c0_g2;TR17042_c0_g1;TR17342_c4_g4;TR17346_c10_g3;TR18389_c0_g1;TR18389_c1_g1;TR19661_c0_g1;TR22269_c0_g1;TR24384_c0_g1;TR24488_c0_g1;TR24613_c0_g1;TR25463_c0_g1;TR25463_c0_g2;TR26029_c1_g1;TR28043_c0_g1;TR28083_c0_g1;TR28137_c0_g1;TR28594_c0_g1;TR29947_c0_g1;TR30090…	K00901+K00901+K00901+K13644+K00901+K13513+K13513+K01047+K13515+K00999+K13509+K01080+K14156+K00993+K00993+K01047+K00006+K01115+K13511+K06130+K01049+K01049+K00967+K01047+K01049+K01080+K01080+K14676+K01613+K00901+K00901+K00901+K00901+K01517+K01047+K00111+K13514+K01080+K00901+K01049+K00995+K13513+K13516+K13516+K08730+K08729+K14621+K06129+K06129+K00894+K01049+K00006+K00006+K13510+K01047+K13506+K01047+…
Ether lipid metabolism	ko00565	33	TR10645_c0_g1;TR10645_c0_g2;TR13438_c0_g1;TR14502_c0_g1;TR17342_c4_g4;TR18389_c0_g1;TR18389_c1_g1;TR19661_c0_g1;TR24384_c0_g1;TR25340_c0_g1;TR28043_c0_g1;TR28137_c0_g1;TR28594_c0_g1;TR32768_c1_g4;TR33794_c0_g1;TR36055_c5_g7;TR40056_c0_g1;TR41669_c0_g1;TR41669_c0_g2;TR41669_c0_g3;TR4509_c0_g1;TR45148_c0_g1;TR45270_c0_g1;TR45270_c0_g2;TR45270_c1_g1;TR45840_c1_g1;TR51205_c0_g1;TR52530_c0_g1;TR54205_…	K01062+K01062+K13644+K01047+K01080+K00993+K00993+K01047+K01115+K01122+K01047+K01080+K01080+K01047+K01080+K00803+K14621+K01062+K01062+K01062+K13510+K01047+K01047+K01047+K01047+K01080+K01080+K08743+K01047+K01080+K01080+K01122+K01115
Arachidonic acid metabolism	ko00590	52	TR12104_c0_g1;TR13032_c0_g1;TR13032_c0_g2;TR14502_c0_g1;TR15354_c0_g1;TR16331_c0_g1;TR19661_c0_g1;TR19930_c0_g1;TR22592_c0_g1;TR23284_c1_g1;TR23284_c1_g2;TR23496_c0_g1;TR23830_c0_g1;TR23830_c0_g2;TR25496_c1_g2;TR26322_c0_g1;TR26322_c0_g2;TR26853_c0_g2;TR26929_c0_g1;TR28043_c0_g1;TR28627_c0_g2;TR29265_c3_g4;TR29265_c3_g5;TR2_c0_g1;TR32538_c0_g1;TR32768_c1_g4;TR35322_c0_g1;TR375_c0_g1;TR375_c0_g2;T…	K00681+K01830+K01830+K01047+K00432+K00079+K01047+K01254+K00461+K00432+K00432+K07425+K07422+K07422+K07425+K00432+K00432+K00079+K00432+K01047+K00432+K00432+K00432+K01830+K00432+K01047+K00681+K00461+K00461+K00461+K14621+K01832+K00461+K00681+K01047+K01047+K01047+K01047+K00461+K00461+K00461+K00432+K00681+K00681+K00681+K08021+K01047+K00681+K07418+K00461+K05309+K11987
Linoleic acid metabolism	ko00591	20	TR1293_c0_g1;TR14502_c0_g1;TR18019_c0_g1;TR19661_c0_g1;TR20249_c2_g1;TR20804_c1_g1;TR22282_c0_g1;TR26798_c1_g1;TR27383_c0_g1;TR3204_c0_g1;TR32768_c1_g4;TR40056_c0_g1;TR43733_c0_g1;TR45148_c0_g1;TR45270_c0_g1;TR45270_c0_g2;TR45270_c1_g1;TR58146_c0_g1;TR9749_c5_g1;TR9749_c6_g1;	K07424+K01047+K07424+K01047+K07424+K07424+K07424+K07424+K07424+K07424+K01047+K14621+K07424+K01047+K01047+K01047+K01047+K07418+K07424+K07424
alpha-Linolenic acid metabolism	ko00592	17	TR14502_c0_g1;TR14963_c0_g1;TR19661_c0_g1;TR23651_c0_g1;TR23760_c0_g1;TR28043_c0_g1;TR30139_c0_g1;TR32768_c1_g4;TR40056_c0_g1;TR45148_c0_g1;TR45270_c0_g1;TR45270_c0_g2;TR45270_c1_g1;TR45762_c0_g1;TR54205_c0_g1;TR7459_c1_g14;TR7706_c0_g1;	K01047+K10226+K01047+K00232+K00232+K01047+K00232+K01047+K14621+K01047+K01047+K01047+K01047+K10226+K01047+K00232+K10226
Sphingolipid metabolism	ko00600	58	TR16201_c0_g1;TR17342_c4_g4;TR18830_c0_g1;TR19097_c1_g1;TR21569_c1_g1;TR23296_c1_g1;TR24896_c0_g1;TR26671_c0_g1;TR28134_c0_g1;TR28137_c0_g1;TR28594_c0_g1;TR29885_c0_g1;TR3038_c0_g1;TR3038_c0_g2;TR30452_c0_g1;TR30452_c0_g2;TR30795_c0_g1;TR33794_c0_g1;TR34598_c0_g2;TR35125_c0_g1;TR35997_c2_g1;TR36417_c0_g1;TR36896_c0_g1;TR37907_c0_g1;TR38262_c2_g1;TR38262_c2_g4;TR39466_c0_g1;TR39466_c1_g1;TR39466_c…	K00720+K01080+K04716+K01189+K04715+K12348+K12350+K12353+K04715+K01080+K01080+K01201+K00720+K00720+K04715+K04715+K04715+K01080+K01634+K12348+K01202+K04716+K04711+K12349+K01201+K01201+K01202+K01202+K01202+K01189+K04718+K01202+K00654+K04715+K12309+K00654+K01634+K01080+K12351+K01080+K01201+K01201+K04712+K12348+K00654+K04708+K01080+K01080+K04718+K00654+K04715+K01202+K04712+K00654+K04715+K04715+K04715+…
Glycosphingolipid biosynthesis - lacto and neolacto series	ko00601	13	TR23970_c0_g1;TR27208_c0_g1;TR29327_c0_g1;TR32297_c0_g1;TR33105_c0_g2;TR40251_c0_g1;TR4216_c0_g1;TR4216_c0_g2;TR48056_c4_g1;TR51453_c0_g1;TR55095_c0_g1;TR57903_c0_g1;TR9883_c0_g1;	K00742+K07819+K00742+K00742+K07819+K07820+K00741+K00741+K07819+K07819+K00742+K07819+K07819
Glycosphingolipid biosynthesis - globo series	ko00603	23	TR12039_c0_g1;TR13363_c0_g1;TR14365_c1_g1;TR14692_c0_g1;TR19097_c1_g1;TR26831_c0_g1;TR29994_c0_g1;TR35905_c0_g1;TR36538_c0_g1;TR37604_c0_g1;TR37635_c1_g1;TR37635_c1_g2;TR37635_c1_g3;TR38272_c0_g1;TR40374_c0_g1;TR41848_c0_g1;TR44207_c0_g1;TR44915_c0_g1;TR48019_c0_g1;TR48019_c0_g2;TR49498_c0_g1;TR57354_c5_g1;TR90_c1_g1;	K01204+K12373+K12373+K01204+K01189+K01204+K12373+K12373+K01204+K12373+K12373+K12373+K12373+K12373+K01189+K12373+K12373+K12373+K12373+K12373+K12373+K01204+K12373
Glycosphingolipid biosynthesis - ganglio series	ko00604	18	TR13363_c0_g1;TR14365_c1_g1;TR23276_c0_g2;TR29994_c0_g1;TR35905_c0_g1;TR37604_c0_g1;TR37635_c1_g1;TR37635_c1_g2;TR37635_c1_g3;TR38272_c0_g1;TR41848_c0_g1;TR44207_c0_g1;TR44804_c0_g1;TR44915_c0_g1;TR48019_c0_g1;TR48019_c0_g2;TR49498_c0_g1;TR90_c1_g1;	K12373+K12373+K03372+K12373+K12373+K12373+K12373+K12373+K12373+K12373+K12373+K12373+K12309+K12373+K12373+K12373+K12373+K12373
Pyruvate metabolism	ko00620	39	TR12314_c0_g1;TR23249_c0_g1;TR23272_c0_g1;TR23272_c0_g2;TR23272_c0_g3;TR23460_c3_g1;TR25893_c0_g1;TR26634_c0_g1;TR29297_c0_g1;TR29786_c1_g5;TR29861_c0_g1;TR30054_c0_g1;TR30129_c1_g1;TR3198_c0_g1;TR32276_c9_g8;TR32278_c0_g1;TR32859_c2_g1;TR32873_c0_g2;TR34621_c0_g1;TR35363_c0_g1;TR36234_c0_g1;TR41573_c0_g1;TR41839_c0_g1;TR41839_c0_g2;TR47854_c0_g1;TR47916_c0_g1;TR51748_c5_g1;TR54378_c2_g1;TR54378_…	K11262+K00029+K00128+K00128+K00128+K00382+K01596+K01596+K00149+K00011+K14085+K01958+K00102+K13997+K00026+K01895+K00626+K00873+K00011+K00025+K01759+K00162+K00627+K00627+K00025+K00102+K00128+K00128+K00128+K00128+K01069+K01895+K01007+K01007+K01007+K00029+K11262+K11262+K01596
Glyoxylate and dicarboxylate metabolism	ko00630	18	TR11733_c0_g1;TR24545_c0_g1;TR29313_c1_g1;TR29516_c0_g1;TR29516_c0_g2;TR29516_c0_g3;TR29848_c0_g1;TR30115_c2_g1;TR32276_c9_g8;TR32859_c2_g1;TR34992_c0_g1;TR35363_c0_g1;TR45868_c0_g2;TR47854_c0_g1;TR48790_c1_g1;TR5020_c0_g1;TR5038_c1_g1;TR57585_c0_g1;	K01681+K01091+K01647+K00865+K00865+K00865+K05606+K01847+K00026+K00626+K01816+K00025+K01432+K00025+K01681+K01965+K01966+K01647
Propanoate metabolism	ko00640	34	TR10458_c1_g1;TR12314_c0_g1;TR17200_c0_g1;TR2188_c0_g1;TR22218_c0_g1;TR22218_c1_g1;TR23272_c0_g1;TR23272_c0_g2;TR23272_c0_g3;TR24428_c0_g1;TR25835_c8_g2;TR25858_c0_g1;TR29297_c0_g1;TR29848_c0_g1;TR29861_c0_g1;TR30115_c2_g1;TR32278_c0_g1;TR32737_c0_g1;TR32787_c0_g1;TR32859_c2_g1;TR36523_c0_g1;TR37491_c0_g1;TR40286_c0_g1;TR5020_c0_g1;TR5038_c1_g1;TR51748_c5_g1;TR52522_c0_g1;TR54004_c0_g1;TR54378_c2…	K01578+K11262+K01900+K13524+K05605+K05605+K00128+K00128+K00128+K01908+K00249+K07514+K00149+K05606+K14085+K01847+K01895+K01900+K13524+K00626+K01899+K07511+K07515+K01965+K01966+K00128+K01692+K00140+K00128+K00128+K00128+K01895+K11262+K11262
Butanoate metabolism	ko00650	29	TR12946_c0_g1;TR15221_c0_g1;TR1604_c0_g1;TR2188_c0_g1;TR22822_c0_g1;TR22822_c0_g2;TR25858_c0_g1;TR2960_c0_g1;TR32787_c0_g1;TR32859_c2_g1;TR3286_c2_g1;TR34266_c0_g1;TR36833_c0_g1;TR37491_c0_g1;TR38494_c1_g1;TR3926_c0_g1;TR40286_c0_g1;TR41573_c0_g1;TR46140_c0_g1;TR47910_c1_g1;TR50488_c0_g1;TR52518_c0_g1;TR52522_c0_g1;TR55664_c0_g1;TR56685_c0_g1;TR57383_c0_g1;TR7116_c0_g1;TR8233_c1_g6;TR9012_c2_g1;	K01640+K00109+K00022+K13524+K00248+K00248+K07514+K00019+K13524+K00626+K01907+K01641+K00019+K07511+K01027+K00019+K07515+K00162+K00019+K00019+K00019+K00019+K01692+K00019+K00019+K00019+K00019+K01896+K00139
One carbon pool by folate	ko00670	18	TR17279_c0_g1;TR18788_c0_g1;TR20705_c0_g1;TR21206_c0_g1;TR33196_c0_g1;TR34328_c0_g1;TR34818_c0_g1;TR36026_c6_g1;TR39311_c0_g1;TR41531_c0_g1;TR43196_c0_g1;TR49013_c0_g1;TR50753_c0_g1;TR5248_c0_g1;TR5248_c1_g1;TR55390_c0_g1;TR5834_c0_g1;TR7256_c4_g1;	K00289+K00287+K01934+K13403+K00602+K00560+K11787+K13990+K11787+K00288+K00605+K01934+K00297+K00548+K00548+K00604+K00600+K00600
Thiamine metabolism	ko00730	3	TR41537_c0_g1;TR44905_c0_g1;TR44905_c0_g2;	K04487+K06928+K06928
Riboflavin metabolism	ko00740	20	TR10608_c0_g1;TR1210_c0_g1;TR1662_c0_g1;TR25875_c2_g1;TR2876_c0_g1;TR29827_c9_g1;TR35776_c1_g1;TR37132_c0_g1;TR37509_c0_g1;TR41512_c0_g1;TR42046_c0_g1;TR43825_c0_g1;TR46156_c0_g1;TR46652_c0_g1;TR51695_c0_g1;TR5710_c0_g1;TR58731_c0_g1;TR58731_c0_g2;TR58909_c0_g1;TR6209_c0_g1;	K14410+K14379+K01513+K01513+K01513+K00861+K14379+K14394+K14395+K14410+K14379+K14410+K00953+K01513+K01513+K01513+K01513+K01513+K01513+K00505
Vitamin B6 metabolism	ko00750	10	TR14085_c0_g1;TR15926_c0_g1;TR31033_c0_g1;TR39802_c0_g1;TR4463_c0_g1;TR47821_c0_g1;TR52787_c0_g1;TR52787_c0_g2;TR52984_c0_g1;TR52984_c0_g2;	K06215+K06215+K00868+K00831+K13248+K06215+K08681+K08681+K00275+K00275
Nicotinate and nicotinamide metabolism	ko00760	33	TR10421_c4_g1;TR11434_c0_g1;TR11434_c1_g1;TR11781_c0_g1;TR12325_c0_g1;TR1662_c0_g1;TR20660_c0_g1;TR2472_c0_g1;TR25514_c0_g2;TR25875_c2_g1;TR26531_c0_g1;TR26560_c0_g1;TR2876_c0_g1;TR32087_c0_g1;TR35421_c0_g1;TR35421_c0_g2;TR4488_c0_g1;TR46652_c0_g1;TR47629_c0_g2;TR47629_c0_g3;TR50164_c0_g1;TR51695_c0_g1;TR52168_c0_g1;TR54164_c1_g1;TR55640_c0_g1;TR5710_c0_g1;TR58731_c0_g1;TR58731_c0_g2;TR58909_c0_g…	K01081+K00767+K00767+K01242+K10524+K01513+K01081+K01950+K00323+K01513+K01081+K00763+K01513+K01950+K06210+K06210+K03426+K01513+K00858+K00858+K03462+K01513+K01242+K06210+K01242+K01513+K01513+K01513+K01513+K01242+K03783+K03783+K01081
Pantothenate and CoA biosynthesis	ko00770	25	TR11210_c0_g1;TR1662_c0_g1;TR17432_c0_g1;TR2526_c1_g1;TR25875_c2_g1;TR26249_c0_g1;TR28380_c0_g1;TR2876_c0_g1;TR36490_c0_g1;TR38453_c1_g1;TR39152_c0_g1;TR41308_c0_g1;TR44250_c0_g1;TR46652_c0_g1;TR48372_c0_g1;TR48372_c0_g2;TR48586_c0_g1;TR51695_c0_g1;TR5710_c0_g1;TR58731_c0_g1;TR58731_c0_g2;TR58909_c0_g1;TR6559_c0_g1;TR8190_c0_g1;TR972_c0_g1;	K09680+K01513+K08069+K08069+K01513+K01464+K01598+K01513+K00826+K01431+K01922+K08069+K08069+K01513+K09680+K09680+K08069+K01513+K01513+K01513+K01513+K01513+K02318+K00207+K08069
Biotin metabolism	ko00780	1	TR2526_c0_g2;	K01435
Lipoic acid metabolism	ko00785	7	TR23048_c0_g1;TR23048_c0_g2;TR23232_c0_g1;TR23232_c0_g2;TR25138_c0_g1;TR6805_c0_g1;TR6805_c0_g2;	K03801+K03801+K10105+K10105+K03644+K03801+K03801
Folate biosynthesis	ko00790	9	TR18788_c0_g1;TR26513_c1_g1;TR29505_c1_g1;TR34457_c0_g1;TR35987_c0_g1;TR36047_c0_g1;TR53732_c0_g1;TR9401_c6_g1;TR9724_c0_g1;	K00287+K01077+K00072+K01307+K01077+K00357+K01077+K01737+K01930
Retinol metabolism	ko00830	30	TR12246_c1_g1;TR1293_c0_g1;TR13813_c0_g1;TR16395_c0_g1;TR17557_c0_g1;TR18019_c0_g1;TR20249_c2_g1;TR20804_c1_g1;TR21425_c0_g1;TR22282_c0_g1;TR23496_c0_g1;TR24493_c0_g1;TR25079_c0_g1;TR25496_c1_g2;TR26798_c1_g1;TR27383_c0_g1;TR29258_c0_g1;TR3204_c0_g1;TR42039_c0_g1;TR4222_c0_g1;TR4222_c0_g2;TR43733_c0_g1;TR49052_c1_g1;TR49753_c0_g1;TR50107_c0_g1;TR54139_c0_g1;TR57349_c10_g1;TR9735_c0_g1;TR9749_c5_g…	K11154+K07424+K11154+K00121+K11155+K07424+K07424+K07424+K07437+K07424+K07425+K07249+K07408+K07425+K07424+K07424+K09516+K07424+K11147+K11147+K11147+K07424+K00121+K11157+K00121+K07249+K11147+K07249+K07424+K07424
Porphyrin and chlorophyll metabolism	ko00860	26	TR17947_c0_g1;TR20095_c0_g1;TR21834_c0_g1;TR2197_c0_g1;TR29270_c1_g1;TR3106_c0_g1;TR32255_c0_g1;TR32862_c2_g1;TR36180_c0_g1;TR41517_c0_g1;TR41517_c1_g1;TR41517_c1_g2;TR43766_c0_g1;TR44211_c1_g1;TR44537_c0_g1;TR44571_c0_g1;TR44571_c0_g2;TR44571_c1_g1;TR46172_c1_g2;TR51788_c1_g1;TR55087_c0_g1;TR56987_c0_g1;TR57126_c1_g1;TR5762_c0_g1;TR6983_c0_g2;TR6983_c0_g4;	K01764+K02259+K01195+K00231+K00643+K00522+K01885+K00522+K00522+K14163+K14163+K14163+K00214+K00228+K00522+K01749+K01749+K01749+K01698+K01599+K02257+K00798+K00522+K01772+K01719+K01719
Terpenoid backbone biosynthesis	ko00900	14	TR10384_c2_g1;TR1202_c0_g1;TR1202_c0_g2;TR12898_c0_g1;TR2747_c0_g1;TR28715_c1_g1;TR32859_c2_g1;TR34266_c0_g1;TR37460_c0_g1;TR46477_c0_g1;TR49582_c0_g1;TR49582_c0_g2;TR5073_c0_g1;TR56851_c0_g1;	K01597+K00021+K00021+K01823+K12504+K11778+K00626+K01641+K00869+K00804+K00787+K00787+K13273+K12505
Nitrogen metabolism	ko00910	28	TR10183_c0_g1;TR20321_c0_g1;TR21836_c0_g1;TR23491_c0_g1;TR26656_c0_g1;TR26656_c1_g2;TR30890_c0_g1;TR31561_c0_g1;TR35249_c0_g1;TR35752_c0_g1;TR36054_c0_g1;TR36054_c0_g2;TR36054_c0_g3;TR38647_c0_g1;TR40217_c8_g1;TR42534_c0_g1;TR4269_c0_g1;TR42734_c0_g1;TR43196_c0_g1;TR43693_c0_g1;TR45865_c0_g1;TR48658_c0_g1;TR48731_c0_g1;TR52362_c0_g1;TR53009_c0_g1;TR5536_c0_g1;TR55594_c0_g1;TR9607_c0_g1;	K01915+K01425+K01915+K01745+K01672+K01672+K01672+K01915+K01672+K01915+K00264+K00264+K00264+K01758+K00261+K01745+K01672+K01672+K00605+K01672+K01915+K01953+K01915+K01425+K01672+K01915+K01672+K01672
Sulfur metabolism	ko00920	17	TR11195_c0_g1;TR12444_c1_g1;TR18854_c0_g1;TR19086_c0_g1;TR22293_c0_g1;TR25833_c0_g1;TR26704_c4_g2;TR29925_c0_g1;TR30451_c0_g1;TR30451_c0_g2;TR31971_c0_g1;TR38104_c0_g1;TR45474_c0_g1;TR5176_c0_g1;TR5176_c0_g2;TR53771_c0_g1;TR6075_c0_g1;	K01082+K00387+K01014+K07779+K01738+K00641+K01014+K13811+K00380+K00380+K01017+K01017+K01017+K00380+K00380+K01016+K01014
Aminoacyl-tRNA biosynthesis	ko00970	47	TR15132_c0_g2;TR17305_c0_g1;TR20731_c0_g1;TR20731_c0_g2;TR21357_c0_g1;TR21700_c0_g1;TR21827_c0_g1;TR23237_c0_g1;TR23779_c0_g1;TR26822_c0_g1;TR29347_c1_g1;TR32005_c4_g9;TR32255_c0_g1;TR3325_c1_g2;TR35041_c0_g1;TR35317_c0_g1;TR35719_c0_g1;TR38253_c0_g3;TR38737_c0_g1;TR38737_c1_g1;TR38737_c2_g1;TR38797_c0_g1;TR40368_c0_g1;TR41344_c0_g1;TR41517_c0_g1;TR41517_c1_g1;TR41517_c1_g2;TR43605_c0_g1;TR43605_…	K01867+K01872+K01870+K01870+K01880+K01887+K01883+K01875+K01868+K01893+K01875+K01883+K01885+K01874+K01867+K01873+K01876+K01886+K01870+K01870+K01870+K01887+K01889+K01869+K14163+K14163+K14163+K01866+K01866+K01890+K01872+K01873+K01866+K01889+K01876+K01874+K01893+K10837+K01869+K00604+K01881+K04567+K01875+K01869+K03341+K01892+K01875
Metabolism of xenobiotics by cytochrome P450	ko00980	37	TR1097_c0_g3;TR1293_c0_g1;TR15276_c0_g1;TR15665_c0_g1;TR16395_c0_g1;TR18019_c0_g1;TR18368_c0_g1;TR20249_c2_g1;TR20804_c1_g1;TR22282_c0_g1;TR25079_c0_g1;TR25358_c0_g1;TR25358_c0_g2;TR26798_c1_g1;TR27383_c0_g1;TR27901_c0_g1;TR27901_c0_g2;TR3204_c0_g1;TR38447_c1_g1;TR39937_c0_g1;TR40063_c0_g1;TR40346_c0_g1;TR42700_c0_g1;TR43733_c0_g1;TR44227_c0_g1;TR45829_c0_g1;TR49052_c1_g1;TR50107_c0_g1;TR5121_c0_…	K00799+K07424+K00799+K00799+K00121+K07424+K00799+K07424+K07424+K07424+K07408+K00799+K00799+K07424+K07424+K00799+K00799+K07424+K00799+K00799+K00799+K00799+K00799+K07424+K00799+K00799+K00121+K00121+K00799+K00799+K00799+K00799+K00799+K00799+K07424+K07424+K00078
Drug metabolism - cytochrome P450	ko00982	45	TR1097_c0_g3;TR1293_c0_g1;TR15276_c0_g1;TR15665_c0_g1;TR16395_c0_g1;TR17239_c0_g1;TR17823_c0_g1;TR18019_c0_g1;TR18175_c0_g1;TR18175_c0_g2;TR18368_c0_g1;TR20249_c2_g1;TR20804_c1_g1;TR22282_c0_g1;TR25358_c0_g1;TR25358_c0_g2;TR26798_c1_g1;TR27383_c0_g1;TR27901_c0_g1;TR27901_c0_g2;TR3204_c0_g1;TR38447_c1_g1;TR39108_c0_g2;TR39937_c0_g1;TR40063_c0_g1;TR40345_c0_g1;TR40346_c0_g1;TR42700_c0_g1;TR43733_c0…	K00799+K07424+K00799+K00799+K00121+K00485+K07414+K07424+K00485+K00485+K00799+K07424+K07424+K07424+K00799+K00799+K07424+K07424+K00799+K00799+K07424+K00799+K00274+K00799+K00799+K00485+K00799+K00799+K07424+K00799+K00799+K00485+K00121+K00121+K00799+K00799+K00274+K07414+K00799+K00799+K00799+K00485+K00799+K07424+K07424
Drug metabolism - other enzymes	ko00983	50	TR10430_c0_g2;TR10566_c2_g1;TR1293_c0_g1;TR15506_c0_g1;TR1552_c0_g1;TR18019_c0_g1;TR20249_c2_g1;TR20804_c1_g1;TR21834_c0_g1;TR22282_c0_g1;TR26249_c0_g1;TR26798_c1_g1;TR268_c0_g1;TR27231_c0_g1;TR27231_c0_g2;TR27383_c0_g1;TR29011_c0_g1;TR3114_c1_g1;TR3114_c2_g1;TR3204_c0_g1;TR33413_c1_g1;TR33761_c0_g1;TR35350_c1_g1;TR35350_c1_g2;TR35350_c1_g3;TR36455_c0_g1;TR36455_c0_g2;TR36455_c1_g1;TR36455_c1_g2;…	K00760+K00757+K07424+K01951+K00106+K07424+K07424+K07424+K01195+K07424+K01464+K07424+K03927+K00569+K00569+K07424+K01489+K00757+K00757+K07424+K00569+K00857+K00106+K00106+K00106+K00106+K00106+K00106+K00106+K00569+K00569+K00876+K01431+K00106+K00106+K07424+K00857+K13421+K00088+K00857+K01519+K00857+K00106+K01044+K00569+K00857+K00088+K00207+K07424+K07424
Biosynthesis of unsaturated fatty acids	ko01040	19	TR14963_c0_g1;TR15451_c0_g1;TR19828_c1_g1;TR21385_c4_g1;TR23267_c1_g2;TR23651_c0_g1;TR23760_c0_g1;TR29870_c8_g1;TR30139_c0_g1;TR37995_c0_g1;TR40272_c7_g2;TR40286_c0_g1;TR41337_c0_g1;TR45762_c0_g1;TR5546_c0_g1;TR56834_c0_g1;TR7459_c1_g14;TR7706_c0_g1;TR9059_c4_g1;	K10226+K00507+K10244+K10703+K00659+K00232+K00232+K07513+K00232+K00507+K00507+K07515+K07753+K10226+K10256+K10258+K00232+K10226+K10251
ABC transporters	ko02010	77	TR10319_c1_g1;TR11799_c0_g1;TR1230_c0_g1;TR15784_c0_g1;TR15784_c1_g1;TR15879_c0_g1;TR15936_c0_g1;TR15936_c0_g2;TR16041_c0_g1;TR16514_c0_g1;TR16514_c1_g1;TR17343_c0_g1;TR17450_c0_g1;TR18202_c0_g1;TR19607_c0_g1;TR20827_c0_g1;TR2164_c0_g1;TR21786_c0_g1;TR22489_c0_g1;TR23177_c0_g1;TR23749_c0_g2;TR23796_c0_g1;TR23796_c1_g1;TR23796_c1_g2;TR2411_c0_g1;TR252_c0_g1;TR25398_c0_g1;TR25552_c0_g1;TR25940_c0_g…	K05668+K05674+K05642+K05658+K05658+K05674+K05667+K05667+K05678+K05641+K05641+K05657+K05644+K05681+K05643+K05643+K05642+K05679+K05678+K05648+K05667+K05683+K05683+K05683+K05641+K05643+K05664+K05648+K05643+K05643+K05658+K05643+K05642+K05642+K05677+K05668+K05656+K05656+K05641+K05641+K05674+K05642+K05648+K05672+K05673+K05674+K05673+K05673+K05676+K05674+K05684+K05681+K05644+K05643+K05643+K05643+K05667+…
Ribosome biogenesis in eukaryotes	ko03008	84	TR10056_c0_g1;TR10410_c3_g2;TR10533_c0_g1;TR10533_c1_g1;TR10582_c0_g1;TR10631_c1_g1;TR11142_c0_g1;TR11176_c0_g1;TR11176_c0_g2;TR1229_c0_g1;TR13901_c0_g1;TR16370_c0_g1;TR16370_c0_g2;TR18169_c0_g1;TR18169_c0_g2;TR19730_c0_g1;TR20739_c0_g1;TR20751_c0_g2;TR20767_c0_g1;TR21675_c0_g1;TR22724_c0_g1;TR22823_c0_g1;TR23228_c0_g1;TR2344_c0_g1;TR23504_c4_g1;TR23763_c0_g1;TR23881_c6_g2;TR24922_c0_g1;TR24922_c…	K03537+K11128+K14570+K14570+K14523+K14555+K14535+K07562+K07562+K03115+K14571+K14538+K14538+K14566+K14566+K07179+K01164+K07936+K14570+K14571+K13288+K14560+K12618+K14549+K07178+K14574+K14569+K14559+K14559+K14563+K03685+K03685+K14558+K14565+K03097+K14567+K14572+K14568+K14568+K14570+K14570+K03264+K14290+K14575+K14552+K14556+K11883+K14539+K14539+K14554+K14548+K14546+K14521+K14557+K14535+K11129+K14530+…
Ribosome	ko03010	111	TR1154_c0_g1;TR1160_c0_g1;TR1169_c0_g1;TR1178_c0_g1;TR1195_c0_g1;TR12570_c0_g1;TR14132_c0_g1;TR14265_c0_g1;TR15906_c0_g1;TR15988_c0_g1;TR15988_c0_g2;TR1610_c0_g1;TR1645_c0_g1;TR16927_c0_g1;TR19276_c0_g2;TR19537_c0_g1;TR19756_c0_g1;TR20200_c0_g1;TR21250_c0_g1;TR23114_c1_g1;TR23983_c0_g1;TR24031_c0_g1;TR24300_c0_g1;TR24349_c0_g1;TR24459_c0_g1;TR24459_c0_g2;TR24461_c0_g1;TR24675_c0_g1;TR24694_c0_g1;…	K02910+K02889+K02917+K02912+K02941+K02960+K02998+K02927+K02971+K02920+K02920+K02929+K02923+K02943+K02905+K02870+K02981+K02991+K02894+K02901+K02915+K02960+K02938+K02985+K02979+K02979+K02955+K02937+K02925+K02925+K02951+K02957+K02891+K02880+K02936+K02949+K02987+K02866+K02896+K02924+K02947+K02947+K02976+K02947+K02947+K02998+K02875+K02898+K02896+K02896+K02896+K02896+K02896+K02896+K02896+K02896+K02896+…
RNA transport	ko03013	182	TR10056_c0_g1;TR10202_c0_g1;TR10448_c9_g1;TR1050_c0_g1;TR10582_c0_g1;TR10633_c2_g1;TR10676_c1_g1;TR10808_c0_g1;TR11176_c0_g1;TR11176_c0_g2;TR11671_c0_g1;TR12333_c0_g1;TR13263_c0_g1;TR13870_c0_g1;TR14160_c0_g1;TR14489_c0_g1;TR14882_c0_g1;TR16445_c0_g1;TR16980_c0_g1;TR17199_c1_g1;TR17227_c0_g1;TR17262_c0_g1;TR17294_c1_g1;TR17295_c2_g1;TR17345_c0_g1;TR17619_c0_g2;TR17941_c0_g1;TR18540_c0_g1;TR18825_…	K03537+K03247+K13171+K12882+K14523+K14292+K14319+K13131+K07562+K07562+K12877+K09291+K13133+K07205+K03259+K14298+K14314+K13133+K09291+K13171+K00974+K12879+K14327+K09291+K14297+K14283+K03250+K14311+K03754+K13129+K01164+K07936+K13114+K14291+K14314+K14314+K03242+K03240+K13137+K14307+K03253+K14325+K03257+K03231+K03260+K14318+K14294+K13130+K03239+K12812+K14322+K03248+K09291+K14316+K13171+K14314+K03262+…
mRNA surveillance pathway	ko03015	76	TR10448_c9_g1;TR10473_c0_g1;TR1050_c0_g1;TR10632_c0_g1;TR11671_c0_g1;TR12181_c0_g1;TR15735_c0_g1;TR17199_c1_g1;TR17294_c1_g1;TR19338_c0_g1;TR20768_c1_g1;TR20781_c0_g1;TR21738_c0_g1;TR23284_c9_g12;TR24423_c0_g1;TR25145_c0_g1;TR26188_c0_g1;TR26757_c0_g1;TR26883_c0_g1;TR29377_c0_g1;TR2995_c0_g1;TR30119_c0_g1;TR30629_c1_g1;TR31973_c0_g1;TR32270_c0_g1;TR3245_c0_g1;TR32687_c0_g1;TR32691_c0_g1;TR32786_c…	K13171+K11583+K12882+K06965+K12877+K11583+K14407+K13171+K14327+K11583+K14402+K13114+K14325+K11584+K14294+K14408+K12812+K14404+K13171+K11584+K14403+K13171+K13171+K14401+K14411+K14323+K14396+K13917+K13025+K08873+K04382+K14406+K13171+K13171+K14397+K13171+K13126+K13126+K14399+K14399+K06100+K13114+K13171+K14411+K14326+K14411+K14411+K11125+K03456+K13171+K12881+K14405+K14326+K14326+K14376+K14400+K14328+…
RNA degradation	ko03018	79	TR11160_c0_g1;TR11694_c0_g1;TR11894_c0_g1;TR12154_c0_g1;TR12629_c0_g1;TR13585_c0_g1;TR14105_c0_g1;TR16220_c0_g1;TR17888_c0_g1;TR19273_c0_g1;TR19899_c0_g1;TR20331_c0_g1;TR20439_c0_g1;TR20985_c0_g1;TR21393_c2_g1;TR23228_c0_g1;TR23851_c0_g1;TR23851_c0_g2;TR23887_c3_g1;TR25096_c0_g1;TR26473_c0_g1;TR26511_c0_g1;TR27849_c0_g1;TR27849_c0_g2;TR28705_c0_g2;TR303_c0_g1;TR31261_c0_g1;TR31261_c0_g2;TR31482_c…	K12592+K12614+K00962+K12625+K12586+K12600+K03514+K11600+K12602+K12611+K01148+K03514+K12581+K12603+K12607+K12618+K12604+K12604+K12622+K04077+K12621+K12572+K14443+K14443+K03681+K14443+K12597+K12597+K07573+K07573+K12591+K12599+K12627+K12626+K01689+K01689+K12593+K12585+K12605+K13126+K13126+K12600+K12597+K10643+K12599+K12615+K12606+K12587+K14442+K14442+K14442+K12616+K12581+K12589+K12597+K03679+K14443+…
RNA polymerase	ko03020	40	TR10615_c1_g1;TR12177_c0_g1;TR16005_c0_g1;TR16758_c0_g1;TR16758_c0_g2;TR20715_c0_g1;TR20726_c0_g1;TR23846_c0_g2;TR23919_c0_g1;TR25437_c0_g1;TR25648_c0_g1;TR28345_c0_g1;TR28501_c0_g1;TR30063_c5_g1;TR3293_c0_g1;TR33391_c0_g1;TR34476_c0_g1;TR34721_c0_g1;TR35616_c0_g1;TR35979_c0_g1;TR36184_c0_g1;TR3821_c0_g1;TR39331_c0_g1;TR41197_c0_g1;TR41534_c1_g1;TR43395_c0_g1;TR44853_c0_g1;TR46942_c0_g1;TR47948_c…	K03015+K03023+K03024+K03014+K03014+K03017+K03026+K03002+K03018+K03022+K14721+K03025+K03007+K03002+K02999+K03012+K03002+K02999+K14721+K03010+K03008+K03016+K03021+K03000+K03002+K14721+K03005+K03020+K03019+K03027+K03002+K03009+K03009+K03013+K03013+K03002+K03011+K14721+K03006+K03006
Basal transcription factors	ko03022	52	TR10643_c0_g1;TR10643_c0_g2;TR11142_c0_g1;TR11653_c0_g1;TR12806_c1_g1;TR14101_c0_g1;TR14392_c0_g1;TR17308_c2_g1;TR20261_c0_g1;TR20261_c0_g2;TR20261_c0_g3;TR20791_c0_g1;TR20791_c0_g2;TR22490_c0_g1;TR23856_c0_g1;TR23856_c2_g1;TR25105_c0_g1;TR25483_c0_g1;TR25812_c1_g1;TR26193_c4_g1;TR28176_c0_g1;TR29824_c0_g1;TR31442_c0_g1;TR32798_c0_g1;TR32863_c0_g1;TR32863_c0_g2;TR36007_c2_g3;TR38293_c0_g1;TR38293…	K03130+K03130+K14535+K03120+K03120+K02202+K03129+K10843+K03134+K03134+K03134+K03122+K03122+K03126+K03125+K03125+K10842+K10844+K03131+K03137+K03143+K14649+K03129+K03124+K03135+K03135+K03142+K03120+K03120+K03139+K03123+K03123+K03123+K03123+K03123+K03144+K03144+K03131+K14535+K03136+K03138+K14650+K06634+K03141+K14650+K03122+K03127+K03128+K03130+K03132+K03120+K03128
DNA replication	ko03030	40	TR10639_c6_g1;TR17599_c0_g1;TR18832_c0_g1;TR19038_c0_g1;TR20560_c0_g1;TR23261_c1_g1;TR23261_c2_g1;TR23261_c3_g1;TR26217_c0_g1;TR26219_c1_g1;TR26524_c0_g1;TR26618_c1_g2;TR26655_c0_g1;TR26659_c5_g1;TR27488_c0_g1;TR2769_c0_g1;TR29528_c1_g2;TR30440_c0_g1;TR34584_c0_g1;TR36154_c0_g1;TR40239_c2_g1;TR41917_c0_g1;TR43168_c0_g1;TR44692_c0_g1;TR45322_c0_g1;TR48081_c0_g1;TR48705_c1_g1;TR50573_c0_g1;TR51200_…	K10756+K10739+K10756+K10747+K02328+K02542+K02542+K02210+K03469+K10755+K02541+K03506+K02684+K02326+K07466+K10744+K02209+K02212+K10740+K10755+K10754+K02685+K10742+K04802+K04799+K02320+K10747+K02540+K10745+K03504+K02325+K10743+K02321+K02321+K07466+K02210+K07466+K02327+K10742+K02324
Spliceosome	ko03040	143	TR10396_c0_g1;TR1050_c0_g1;TR11671_c0_g1;TR12154_c0_g1;TR12466_c0_g1;TR13646_c0_g1;TR14059_c0_g1;TR14447_c0_g1;TR14661_c0_g1;TR14981_c0_g1;TR15768_c0_g1;TR15942_c0_g1;TR16541_c0_g1;TR17175_c0_g1;TR17249_c0_g1;TR17262_c0_g1;TR17330_c0_g1;TR18991_c0_g1;TR18991_c0_g2;TR20629_c0_g1;TR20676_c0_g1;TR20761_c0_g1;TR20800_c0_g1;TR21407_c0_g1;TR21410_c0_g1;TR21689_c0_g1;TR2267_c1_g1;TR23217_c1_g1;TR23316_c…	K12863+K12882+K12877+K12625+K12872+K12896+K12850+K11097+K09564+K12733+K11086+K12837+K12823+K09567+K12842+K12879+K12854+K12831+K12831+K12847+K12811+K11098+K12893+K12811+K12829+K12870+K12833+K12819+K12885+K11984+K12858+K12835+K12827+K12622+K12893+K12822+K03283+K12896+K12860+K12812+K03283+K12621+K12862+K12741+K12893+K12868+K12868+K12815+K12662+K03283+K03283+K03283+K03283+K03283+K12817+K12815+K12815+…
Proteasome	ko03050	44	TR11977_c0_g1;TR12290_c0_g1;TR15928_c0_g1;TR16815_c0_g1;TR17313_c14_g17;TR18858_c0_g1;TR19080_c0_g1;TR20669_c0_g1;TR20940_c0_g1;TR20940_c0_g2;TR20940_c0_g3;TR20940_c0_g4;TR22510_c0_g1;TR26052_c0_g1;TR26237_c1_g1;TR26258_c36_g1;TR26759_c0_g1;TR26837_c0_g1;TR28904_c0_g1;TR30450_c0_g1;TR30567_c0_g1;TR31083_c0_g1;TR33423_c0_g1;TR34424_c0_g1;TR34497_c0_g1;TR36037_c0_g1;TR36537_c0_g1;TR39145_c0_g1;TR39…	K02727+K03061+K10881+K06698+K02731+K02732+K03062+K02738+K03030+K03030+K03030+K03030+K02726+K03029+K03036+K03037+K06700+K03033+K03039+K02736+K03064+K11599+K03038+K02737+K02734+K03032+K03065+K02735+K03031+K03066+K03035+K02729+K03028+K02739+K02725+K03063+K02728+K02730+K06699+K06699+K06699+K06699+K06699+K06699
Protein export	ko03060	27	TR1204_c0_g1;TR12794_c0_g1;TR19389_c0_g1;TR25510_c9_g1;TR26911_c0_g1;TR28003_c1_g1;TR30304_c0_g1;TR34643_c0_g1;TR36881_c0_g1;TR37177_c0_g1;TR39071_c0_g1;TR39112_c0_g1;TR39131_c0_g1;TR4521_c1_g1;TR47159_c0_g1;TR48730_c0_g1;TR4875_c0_g1;TR5081_c0_g1;TR5081_c0_g2;TR53031_c0_g1;TR54539_c0_g1;TR56850_c0_g1;TR58330_c0_g1;TR58844_c0_g1;TR6633_c0_g2;TR8994_c3_g4;TR9343_c0_g1;	K09481+K09490+K12946+K12275+K12948+K12947+K07342+K09648+K09490+K09540+K03105+K12272+K13431+K09647+K09490+K03108+K03107+K09540+K09540+K03104+K10956+K13280+K03109+K09540+K03106+K09540+K09490
PPAR signaling pathway	ko03320	25	TR11353_c0_g1;TR14963_c0_g1;TR15251_c0_g1;TR23496_c0_g1;TR25112_c10_g1;TR25132_c0_g1;TR25496_c1_g2;TR25835_c8_g2;TR25858_c0_g1;TR29870_c8_g1;TR30139_c0_g1;TR33678_c0_g1;TR36034_c0_g1;TR37995_c0_g1;TR39083_c1_g1;TR39398_c0_g1;TR40272_c7_g2;TR42555_c0_g1;TR42555_c2_g1;TR45762_c0_g1;TR48793_c0_g1;TR48793_c0_g2;TR50800_c0_g1;TR51415_c0_g1;TR7439_c0_g1;	K08752+K10226+K07296+K07425+K08762+K08745+K07425+K00249+K07514+K07513+K00232+K01897+K01897+K00507+K06276+K08524+K00507+K00489+K07431+K10226+K01897+K01897+K00255+K08766+K01897
Base excision repair	ko03410	43	TR12109_c0_g1;TR12897_c2_g1;TR13411_c0_g1;TR15884_c0_g1;TR15884_c0_g2;TR19038_c0_g1;TR19269_c0_g1;TR20560_c0_g1;TR22660_c0_g1;TR24848_c0_g1;TR26470_c0_g1;TR26483_c1_g1;TR26618_c1_g2;TR26659_c5_g1;TR29841_c1_g1;TR2989_c0_g1;TR3241_c0_g2;TR33101_c0_g1;TR3318_c0_g1;TR35306_c0_g1;TR36530_c0_g1;TR38517_c0_g1;TR38806_c0_g1;TR39179_c0_g1;TR39428_c0_g1;TR43309_c0_g1;TR44692_c0_g1;TR45322_c0_g1;TR46161_c0…	K03512+K10798+K03512+K03649+K03649+K10747+K03649+K02328+K10798+K10800+K10567+K03648+K03506+K02326+K10803+K10798+K10801+K10798+K10776+K03660+K03648+K02330+K10772+K10798+K03648+K10798+K04802+K04799+K03575+K03652+K10798+K10747+K10798+K03504+K10798+K02325+K10773+K03648+K10771+K10798+K02327+K10569+K02324
Nucleotide excision repair	ko03420	47	TR10639_c6_g1;TR14101_c0_g1;TR16956_c0_g1;TR16956_c1_g1;TR17308_c2_g1;TR17599_c0_g1;TR18832_c0_g1;TR19038_c0_g1;TR19523_c0_g1;TR20560_c0_g1;TR21731_c1_g1;TR21731_c1_g2;TR21731_c1_g3;TR22751_c0_g1;TR23231_c1_g1;TR25105_c0_g1;TR25483_c0_g1;TR25845_c0_g1;TR25864_c0_g1;TR26219_c1_g1;TR26618_c1_g2;TR26659_c5_g1;TR27488_c0_g1;TR28176_c0_g1;TR34584_c0_g1;TR36007_c2_g3;TR36154_c0_g1;TR39826_c0_g1;TR40239…	K10756+K02202+K10570+K10570+K10843+K10739+K10756+K10747+K10140+K02328+K10839+K10839+K10839+K03868+K10849+K10842+K10844+K10610+K10609+K10755+K03506+K02326+K07466+K03143+K10740+K03142+K10755+K10848+K10754+K03144+K03144+K10839+K10846+K04802+K10847+K10846+K06634+K03141+K10747+K10841+K03504+K10838+K02325+K07466+K07466+K02327+K02324
Mismatch repair	ko03430	31	TR10639_c6_g1;TR17599_c0_g1;TR18832_c0_g1;TR19038_c0_g1;TR20560_c0_g1;TR21777_c0_g1;TR26219_c1_g1;TR27488_c0_g1;TR29604_c0_g1;TR29604_c0_g3;TR29604_c1_g1;TR29863_c2_g1;TR3315_c0_g1;TR33267_c0_g1;TR33267_c0_g2;TR33310_c0_g1;TR33462_c0_g1;TR33462_c0_g2;TR34584_c0_g1;TR36154_c0_g1;TR40239_c2_g1;TR41555_c0_g1;TR44692_c0_g1;TR46476_c0_g1;TR46476_c0_g2;TR48705_c1_g1;TR51263_c0_g1;TR5792_c0_g1;TR7106_c0…	K10756+K10739+K10756+K10747+K02328+K08739+K10755+K07466+K10746+K10746+K10746+K08734+K08737+K08739+K08739+K08739+K08735+K08735+K10740+K10755+K10754+K10858+K04802+K08737+K08737+K10747+K03504+K07466+K07466+K02327+K08736
Homologous recombination	ko03440	31	TR11992_c0_g1;TR11992_c0_g2;TR15928_c0_g1;TR16784_c0_g1;TR17599_c0_g1;TR18377_c0_g1;TR20560_c0_g1;TR22785_c0_g2;TR25108_c0_g1;TR25199_c0_g2;TR27488_c0_g1;TR33263_c0_g1;TR34584_c0_g1;TR35273_c0_g1;TR35343_c0_g1;TR37499_c0_g1;TR37499_c1_g1;TR38454_c2_g1;TR38487_c0_g1;TR40086_c0_g1;TR44527_c0_g1;TR44527_c0_g2;TR4476_c1_g1;TR48748_c0_g1;TR51263_c0_g1;TR52101_c0_g1;TR53923_c0_g1;TR5792_c0_g1;TR58276_c…	K10882+K10882+K10881+K08991+K10739+K03165+K02328+K10901+K10877+K04482+K07466+K10879+K10740+K10871+K10866+K08775+K08775+K10865+K10867+K03165+K08775+K08775+K08775+K10875+K03504+K10870+K10901+K07466+K10873+K07466+K02327
Non-homologous end-joining	ko03450	19	TR12019_c0_g1;TR12109_c0_g1;TR13411_c0_g1;TR20747_c0_g1;TR31949_c0_g1;TR31949_c0_g2;TR35343_c0_g1;TR38454_c2_g1;TR41227_c0_g1;TR41302_c0_g1;TR45163_c0_g1;TR45322_c0_g1;TR4599_c0_g2;TR46511_c0_g1;TR47053_c0_g1;TR48632_c0_g1;TR48632_c1_g1;TR48758_c0_g1;TR57664_c0_g1;	K10886+K03512+K03512+K10885+K10777+K10777+K10866+K10865+K10884+K00977+K10980+K04799+K06642+K06642+K06642+K06642+K06642+K10887+K06642
MAPK signaling pathway	ko04010	65	TR10156_c0_g2;TR10668_c0_g1;TR10668_c5_g1;TR11307_c0_g1;TR11571_c0_g1;TR14385_c0_g1;TR14502_c0_g1;TR15058_c0_g1;TR1565_c0_g1;TR16606_c1_g1;TR16633_c0_g1;TR17890_c1_g1;TR19661_c0_g1;TR20699_c0_g1;TR20900_c0_g1;TR21404_c19_g1;TR21412_c3_g1;TR21775_c0_g1;TR24016_c0_g1;TR25129_c0_g1;TR2534_c0_g1;TR25670_c0_g1;TR25981_c0_g1;TR26991_c0_g2;TR276_c0_g1;TR29328_c4_g1;TR29868_c0_g1;TR30101_c2_g1;TR30134_c1…	K04393+K04467+K04467+K04459+K04392+K04346+K01047+K03173+K04463+K08052+K04416+K04459+K01047+K04402+K04416+K04377+K04373+K04448+K04404+K04430+K02580+K04416+K06268+K02580+K04412+K03283+K04431+K04353+K04427+K04424+K04437+K04437+K04437+K04463+K04402+K04459+K04422+K04464+K04468+K04437+K04466+K04428+K04402+K02187+K01047+K01047+K01047+K04459+K04459+K05866+K04378+K04392+K04445+K05094+K04392+K04462+K04370+…
ErbB signaling pathway	ko04012	11	TR13870_c0_g1;TR14507_c0_g1;TR14827_c0_g1;TR18258_c0_g1;TR21404_c19_g1;TR21775_c0_g1;TR25129_c0_g1;TR29868_c0_g1;TR48656_c0_g1;TR50914_c0_g1;TR9019_c0_g1;	K07205+K02649+K02649+K04688+K04377+K04448+K04430+K04431+K05725+K00922+K04361
MAPK signaling pathway - fly	ko04013	15	TR1185_c0_g1;TR28299_c1_g1;TR367_c0_g1;TR44005_c0_g1;TR45254_c1_g1;TR45254_c1_g3;TR45254_c1_g4;TR4731_c0_g1;TR48387_c0_g1;TR4923_c1_g1;TR4923_c2_g1;TR50720_c0_g1;TR5096_c0_g2;TR56128_c0_g2;TR6705_c0_g1;	K12378+K04371+K02678+K05088+K12380+K12380+K12380+K04364+K05088+K02644+K02644+K04361+K07293+K02644+K05088
Calcium signaling pathway	ko04020	57	TR1015_c0_g1;TR1015_c0_g2;TR105_c0_g1;TR11366_c0_g1;TR11841_c0_g1;TR12871_c1_g1;TR13444_c0_g1;TR152_c0_g1;TR15663_c0_g1;TR16978_c0_g1;TR18399_c0_g1;TR19183_c0_g1;TR20259_c0_g1;TR21109_c0_g1;TR21593_c0_g1;TR23028_c0_g1;TR2334_c0_g1;TR23900_c3_g1;TR24538_c0_g1;TR25493_c13_g1;TR25981_c0_g1;TR26503_c0_g1;TR27223_c0_g1;TR2759_c0_g1;TR2826_c0_g1;TR30250_c0_g1;TR35176_c0_g1;TR38870_c1_g1;TR40628_c0_g1;T…	K02183+K02183+K02183+K04194+K08049+K07190+K02183+K05857+K02183+K02183+K04194+K02183+K04958+K02183+K13755+K02183+K02183+K00907+K02183+K12042+K06268+K02183+K02183+K02183+K02183+K04142+K02183+K12042+K04718+K04160+K04194+K02183+K04194+K04157+K05862+K04958+K04958+K04194+K04604+K02183+K02183+K04194+K02183+K02183+K08042+K02183+K02183+K02183+K02183+K04160+K01242+K05869+K05858+K01242+K05857+K05857+K04361
Cytokine-cytokine receptor interaction	ko04060	28	TR11558_c1_g1;TR15682_c0_g1;TR15682_c1_g1;TR16015_c0_g1;TR16474_c1_g1;TR21549_c0_g1;TR23444_c0_g1;TR24959_c0_g1;TR25185_c0_g1;TR29619_c0_g2;TR32867_c1_g1;TR38994_c0_g1;TR39094_c0_g1;TR42115_c0_g1;TR43721_c0_g1;TR43721_c0_g2;TR44932_c0_g1;TR46074_c0_g1;TR5085_c0_g1;TR52848_c0_g1;TR54200_c0_g1;TR54545_c0_g1;TR5695_c0_g1;TR57772_c0_g1;TR57772_c0_g2;TR6690_c0_g1;TR9019_c0_g1;TR9397_c0_g1;	K04178+K04675+K04675+K05096+K05064+K05148+K05477+K04721+K04721+K13578+K04723+K04670+K04663+K05478+K05478+K05478+K05478+K04721+K05162+K05480+K05478+K05490+K13596+K02583+K02583+K02583+K04361+K05475
Chemokine signaling pathway	ko04062	16	TR10170_c0_g1;TR10668_c0_g1;TR11558_c1_g1;TR11571_c0_g1;TR11841_c0_g1;TR14827_c0_g1;TR2534_c0_g1;TR33210_c0_g1;TR33210_c0_g2;TR36170_c0_g1;TR40223_c8_g12;TR48656_c0_g1;TR50914_c0_g1;TR5622_c0_g1;TR6369_c0_g1;TR7489_c0_g1;	K05747+K04467+K04178+K04392+K08049+K02649+K02580+K05747+K05747+K05760+K04544+K05725+K00922+K04543+K05858+K05728
Phosphatidylinositol signaling system	ko04070	137	TR10159_c0_g1;TR1015_c0_g1;TR1015_c0_g2;TR105_c0_g1;TR10703_c0_g1;TR11351_c0_g1;TR12478_c0_g1;TR12478_c0_g2;TR12478_c1_g1;TR12885_c1_g1;TR13444_c0_g1;TR1385_c0_g1;TR13960_c0_g1;TR14281_c0_g1;TR14507_c0_g1;TR14827_c0_g1;TR152_c0_g1;TR15663_c0_g1;TR15748_c0_g1;TR15748_c1_g1;TR15970_c0_g1;TR16058_c0_g1;TR16803_c0_g2;TR16978_c0_g1;TR18629_c0_g1;TR19183_c0_g1;TR1934_c0_g1;TR20259_c0_g1;TR21109_c0_g1;T…	K00911+K02183+K02183+K02183+K02183+K13711+K00901+K00901+K00901+K01099+K02183+K00901+K02183+K01099+K02649+K02649+K05857+K02183+K05860+K05860+K02183+K02183+K00999+K02183+K02183+K02183+K02183+K04958+K02183+K00921+K02677+K02183+K00922+K02183+K02183+K02183+K00888+K01099+K01099+K02183+K02183+K00922+K02183+K00911+K02183+K02183+K02183+K02183+K00921+K00923+K00921+K05860+K02183+K05860+K01106+K01106+K01106+…
Neuroactive ligand-receptor interaction	ko04080	131	TR10690_c5_g5;TR11366_c0_g1;TR12497_c1_g1;TR12605_c0_g1;TR12605_c0_g2;TR13401_c0_g1;TR13822_c0_g1;TR13822_c1_g1;TR14259_c0_g1;TR14259_c0_g2;TR1442_c0_g1;TR15084_c0_g1;TR15084_c0_g2;TR16524_c0_g1;TR16745_c0_g2;TR16745_c1_g1;TR16787_c0_g1;TR1729_c0_g1;TR18399_c0_g1;TR18545_c0_g1;TR18910_c0_g1;TR18910_c0_g2;TR1933_c0_g1;TR20048_c0_g1;TR20048_c0_g2;TR21079_c0_g1;TR21079_c0_g2;TR2128_c0_g1;TR21950_c0_…	K04808+K04194+K04230+K05770+K05770+K04803+K04153+K04153+K04816+K04816+K04816+K04261+K04261+K04170+K04237+K04237+K04585+K04810+K04194+K05200+K04308+K04308+K05198+K01315+K01315+K05208+K05208+K04808+K04605+K04577+K05199+K04608+K04280+K04586+K04577+K04615+K04615+K04585+K05052+K04142+K04808+K04803+K04605+K04238+K05236+K04604+K04604+K04237+K04280+K04608+K05770+K04221+K01315+K01315+K01315+K04605+K04615+…
Cell cycle	ko04110	41	TR14369_c0_g1;TR14369_c0_g2;TR17168_c0_g2;TR17298_c1_g1;TR19949_c0_g1;TR20699_c0_g1;TR21404_c19_g1;TR22751_c0_g1;TR23261_c3_g1;TR23758_c0_g1;TR25452_c0_g1;TR25525_c0_g1;TR25525_c1_g1;TR25894_c6_g4;TR26524_c0_g1;TR2772_c0_g1;TR27952_c0_g1;TR30440_c0_g1;TR32698_c1_g1;TR3289_c1_g6;TR33466_c9_g1;TR39238_c0_g1;TR44200_c0_g1;TR44842_c0_g1;TR4593_c0_g1;TR45995_c1_g1;TR47626_c0_g1;TR48040_c0_g1;TR48632_c…	K02604+K02604+K02607+K06669+K03350+K04402+K04377+K03868+K02210+K02606+K06631+K03348+K03348+K06639+K02541+K12456+K08866+K02212+K04402+K02603+K02608+K06670+K04402+K05868+K06644+K02091+K03347+K04681+K06642+K05866+K04500+K03353+K03364+K06618+K03355+K03350+K04498+K06630+K03351+K06630+K06640
Oocyte meiosis	ko04114	54	TR1015_c0_g1;TR1015_c0_g2;TR105_c0_g1;TR11841_c0_g1;TR13444_c0_g1;TR15663_c0_g1;TR15789_c0_g1;TR16978_c0_g1;TR17298_c1_g1;TR19183_c0_g1;TR19949_c0_g1;TR20259_c0_g1;TR21109_c0_g1;TR21412_c3_g1;TR22751_c0_g1;TR23028_c0_g1;TR24538_c0_g1;TR25452_c0_g1;TR25525_c0_g1;TR25525_c1_g1;TR25981_c0_g1;TR26184_c0_g1;TR26490_c0_g1;TR26503_c0_g1;TR27223_c0_g1;TR2759_c0_g1;TR2772_c0_g1;TR2826_c0_g1;TR29377_c0_g1;…	K02183+K02183+K02183+K08049+K02183+K02183+K08694+K02183+K06669+K02183+K03350+K04958+K02183+K04373+K03868+K02183+K02183+K06631+K03348+K03348+K06268+K03362+K10318+K02183+K02183+K02183+K12456+K02183+K11584+K02183+K08045+K02183+K05868+K04958+K04958+K03456+K02183+K02183+K03347+K02183+K02183+K08042+K13054+K03353+K02183+K02183+K02183+K02183+K03355+K03350+K06630+K06269+K03351+K06630
p53 signaling pathway	ko04115	26	TR10569_c0_g1;TR15092_c0_g1;TR15092_c0_g2;TR20699_c0_g1;TR26607_c0_g1;TR28327_c0_g1;TR28886_c0_g1;TR3004_c0_g1;TR31751_c0_g1;TR32041_c0_g1;TR32041_c0_g2;TR32698_c1_g1;TR33207_c0_g1;TR38136_c0_g1;TR39729_c1_g1;TR44200_c0_g1;TR44540_c0_g1;TR44842_c0_g1;TR4593_c0_g1;TR45995_c1_g1;TR48500_c0_g1;TR56966_c0_g1;TR57438_c9_g1;TR58376_c0_g1;TR638_c0_g1;TR7270_c0_g1;	K10135+K10127+K10127+K04402+K02159+K06509+K10135+K04399+K07207+K08738+K08738+K04402+K10145+K07207+K01110+K04402+K02187+K05868+K06644+K02091+K04399+K10808+K02187+K10143+K02187+K06640
Ubiquitin mediated proteolysis	ko04120	259	TR10182_c0_g1;TR10601_c0_g1;TR10677_c0_g1;TR10677_c0_g2;TR10678_c0_g1;TR10678_c1_g2;TR10680_c0_g1;TR10709_c2_g2;TR10717_c0_g1;TR10937_c0_g1;TR10937_c0_g2;TR11031_c0_g1;TR11329_c0_g1;TR11743_c0_g1;TR11937_c0_g1;TR11937_c0_g2;TR11937_c1_g2;TR12359_c0_g1;TR12359_c0_g2;TR13927_c0_g1;TR13927_c0_g2;TR13927_c1_g1;TR13927_c2_g1;TR14370_c0_g1;TR1463_c0_g1;TR1469_c0_g1;TR14713_c0_g1;TR14725_c2_g1;TR14948_c…	K04725+K10612+K03364+K03364+K04556+K03352+K04725+K04725+K10264+K10578+K10578+K03875+K04725+K10585+K10615+K10615+K10615+K04556+K04556+K10591+K10591+K10591+K10591+K04706+K10586+K10447+K10582+K10684+K10260+K04706+K10588+K10594+K04725+K10595+K04416+K04725+K04725+K10570+K10570+K07868+K04725+K10606+K10571+K10593+K10593+K10593+K10593+K10593+K10588+K10595+K10595+K04725+K10140+K03350+K10587+K04416+K10586+…
Sulfur relay system	ko04122	12	TR20128_c0_g1;TR24615_c0_g1;TR26222_c3_g1;TR32717_c0_g1;TR32770_c0_g1;TR36603_c0_g1;TR41537_c0_g1;TR5024_c0_g1;TR55269_c0_g1;TR55269_c0_g2;TR57017_c1_g1;TR7728_c0_g2;	K00566+K01011+K14168+K11996+K01011+K01011+K04487+K14169+K01011+K01011+K03639+K12161
SNARE interactions in vesicular transport	ko04130	33	TR11058_c0_g1;TR11058_c0_g2;TR12644_c1_g1;TR12839_c0_g1;TR16791_c0_g1;TR18357_c0_g1;TR19814_c0_g1;TR21709_c0_g1;TR22253_c1_g1;TR22504_c0_g1;TR27918_c0_g1;TR2950_c0_g1;TR2950_c0_g2;TR29531_c0_g1;TR29531_c0_g2;TR29545_c0_g1;TR32152_c0_g1;TR34033_c0_g1;TR36326_c0_g1;TR36326_c0_g2;TR39369_c0_g1;TR44719_c1_g1;TR45331_c0_g1;TR49063_c0_g1;TR49063_c1_g1;TR49588_c0_g1;TR49728_c0_g1;TR5128_c0_g1;TR55509_c0…	K08504+K08504+K04560+K08488+K13504+K13505+K08509+K08490+K08496+K08486+K08493+K08504+K08504+K08508+K08508+K08515+K08517+K08495+K08507+K08507+K08493+K08497+K08492+K08509+K08509+K08513+K08498+K08501+K08491+K08488+K08489+K08489+K08515
Regulation of autophagy	ko04140	16	TR14697_c1_g1;TR14697_c1_g2;TR15764_c0_g1;TR24365_c0_g1;TR29305_c0_g1;TR31194_c1_g1;TR3246_c0_g1;TR38281_c2_g4;TR45131_c0_g1;TR4606_c0_g1;TR48651_c0_g2;TR49650_c0_g2;TR53989_c0_g1;TR57012_c0_g1;TR7457_c0_g1;TR9037_c4_g1;	K08336+K08336+K08341+K08339+K08269+K08342+K08343+K08341+K08337+K08269+K07198+K08333+K00914+K00914+K08334+K08342
Protein processing in endoplasmic reticulum	ko04141	190	TR1026_c0_g1;TR1026_c1_g1;TR10411_c7_g1;TR10612_c0_g1;TR10633_c0_g1;TR10633_c2_g2;TR10633_c2_g3;TR10642_c0_g1;TR10678_c0_g1;TR10884_c0_g1;TR10937_c0_g1;TR10937_c0_g2;TR10941_c0_g1;TR11261_c0_g1;TR1204_c0_g1;TR12359_c0_g1;TR12359_c0_g2;TR12411_c0_g1;TR12445_c0_g1;TR12794_c0_g1;TR13910_c0_g1;TR14247_c0_g1;TR14284_c0_g1;TR15058_c0_g1;TR15272_c0_g1;TR15272_c0_g2;TR15461_c0_g1;TR15707_c0_g1;TR15780_c0…	K01456+K01456+K14012+K10080+K14007+K14007+K14007+K09582+K04556+K13719+K10578+K10578+K08852+K13984+K09481+K04556+K04556+K09525+K09523+K09490+K09027+K12668+K04374+K03173+K14020+K14020+K14021+K09518+K11718+K11718+K08860+K14001+K04440+K09502+K09530+K10597+K10661+K10661+K10839+K10839+K10839+K11863+K03868+K09584+K02161+K09530+K09530+K09542+K08860+K08860+K08860+K09542+K03283+K05546+K10100+K11519+K12275+…
Lysosome	ko04142	207	TR10583_c0_g1;TR11027_c0_g1;TR11178_c0_g1;TR12021_c0_g1;TR12039_c0_g1;TR12130_c0_g1;TR1230_c0_g1;TR12450_c0_g1;TR12646_c0_g1;TR12861_c0_g2;TR12879_c2_g1;TR13363_c0_g1;TR13723_c0_g1;TR14365_c1_g1;TR14692_c0_g1;TR14918_c0_g1;TR15089_c0_g1;TR15149_c0_g1;TR16335_c0_g1;TR16714_c0_g1;TR17173_c0_g1;TR17325_c1_g1;TR17336_c0_g1;TR17426_c0_g1;TR17429_c0_g1;TR17618_c0_g1;TR18843_c0_g1;TR19070_c0_g1;TR19074_…	K12391+K01365+K12398+K02154+K01204+K13443+K05642+K01137+K12383+K01205+K08568+K12373+K12347+K12373+K01204+K12307+K01136+K12401+K12307+K13443+K01275+K04646+K06564+K01365+K12383+K01074+K12384+K12390+K01136+K01189+K01363+K01365+K01368+K01365+K12388+K12383+K12384+K12384+K12396+K05642+K01195+K12383+K01365+K03662+K12348+K12404+K12385+K12385+K12385+K12385+K12383+K01371+K12301+K12350+K01074+K12301+K01136+…
Endocytosis	ko04144	158	TR10156_c0_g2;TR10233_c0_g1;TR10456_c4_g1;TR10460_c0_g1;TR10547_c0_g1;TR10656_c0_g1;TR10669_c6_g1;TR11229_c1_g1;TR11296_c0_g1;TR11296_c1_g1;TR11958_c0_g1;TR13927_c0_g1;TR13927_c0_g2;TR13927_c1_g1;TR13927_c2_g1;TR1520_c0_g1;TR1520_c0_g2;TR15636_c0_g1;TR15740_c0_g1;TR16015_c0_g1;TR16745_c0_g2;TR16745_c1_g1;TR16890_c0_g1;TR16890_c0_g2;TR17166_c0_g1;TR17166_c0_g2;TR17325_c1_g1;TR17567_c0_g1;TR17600_c…	K04393+K12493+K12478+K04705+K11826+K01528+K12198+K12196+K12485+K12485+K07891+K10591+K10591+K10591+K10591+K12474+K12474+K12489+K12189+K05096+K04237+K04237+K08291+K08291+K11248+K11248+K04646+K12479+K07905+K04361+K04393+K12484+K06503+K12185+K12490+K12481+K12481+K04361+K11839+K11839+K12188+K12488+K11247+K07905+K05099+K05099+K11866+K11866+K01115+K03283+K07891+K12486+K12484+K12183+K12197+K06278+K05099+…
Phagosome	ko04145	174	TR10456_c4_g1;TR10840_c0_g1;TR10885_c0_g1;TR10885_c0_g2;TR11027_c0_g1;TR11385_c0_g1;TR11571_c0_g1;TR11680_c0_g1;TR12021_c0_g1;TR1204_c0_g1;TR12839_c0_g1;TR13961_c0_g1;TR15902_c0_g1;TR15902_c0_g2;TR16322_c0_g1;TR17426_c0_g1;TR17855_c0_g3;TR18357_c0_g1;TR19215_c0_g1;TR19478_c0_g1;TR1952_c0_g1;TR19932_c0_g1;TR20040_c0_g1;TR20096_c0_g1;TR20096_c0_g2;TR20283_c0_g1;TR20283_c0_g2;TR20283_c0_g3;TR20639_c…	K12478+K06563+K07375+K07375+K01365+K06560+K04392+K03991+K02154+K09481+K08488+K06563+K06560+K06560+K05692+K01365+K06563+K13505+K06503+K10413+K06560+K06560+K05719+K10414+K10414+K04392+K04392+K04392+K01365+K01368+K01365+K10160+K10074+K02149+K00921+K04659+K04659+K01365+K03662+K06563+K04659+K06560+K02145+K07374+K04392+K10414+K05692+K04659+K12182+K06560+K10416+K01365+K01365+K01365+K07375+K07375+K07375+…
Peroxisome	ko04146	101	TR10195_c0_g1;TR10451_c0_g1;TR10458_c1_g1;TR11377_c0_g1;TR1140_c0_g1;TR1140_c1_g1;TR12265_c0_g1;TR12946_c0_g1;TR15493_c0_g1;TR15493_c0_g2;TR1552_c0_g1;TR16041_c0_g1;TR17230_c0_g1;TR17964_c1_g1;TR17974_c0_g1;TR17974_c0_g2;TR18841_c0_g1;TR22489_c0_g1;TR2260_c0_g1;TR23267_c1_g2;TR23651_c0_g1;TR23722_c0_g1;TR23760_c0_g1;TR24348_c0_g1;TR24442_c0_g1;TR25503_c1_g1;TR25521_c1_g1;TR25858_c0_g1;TR26635_c0_…	K11187+K08746+K01578+K13356+K13356+K13356+K00273+K01640+K08746+K08746+K00106+K05678+K00477+K00306+K01897+K01897+K00272+K05678+K06664+K00659+K00232+K12405+K00232+K04565+K13343+K08764+K13338+K07514+K13339+K00031+K13354+K07513+K03781+K00232+K05677+K13338+K00031+K05940+K01897+K13342+K01897+K00106+K00106+K00106+K01897+K00803+K00106+K00106+K00106+K00106+K00869+K04565+K05676+K12663+K13279+K00106+K00106+…
mTOR signaling pathway	ko04150	48	TR13042_c1_g1;TR13631_c0_g1;TR13870_c0_g1;TR14160_c0_g1;TR14507_c0_g1;TR14827_c0_g1;TR18258_c0_g1;TR19113_c0_g1;TR19113_c0_g2;TR20200_c0_g1;TR21412_c3_g1;TR21819_c1_g1;TR2309_c0_g1;TR23859_c0_g1;TR25230_c0_g1;TR25810_c1_g1;TR25850_c0_g1;TR28299_c1_g1;TR29305_c0_g1;TR31751_c0_g1;TR31751_c0_g2;TR38136_c0_g1;TR3887_c0_g1;TR3887_c1_g1;TR39083_c1_g1;TR39870_c0_g1;TR43761_c0_g1;TR43761_c0_g2;TR44587_c0…	K07208+K07204+K07205+K03259+K02649+K02649+K04688+K04456+K04456+K02991+K04373+K07204+K00922+K07203+K08272+K08268+K00922+K04371+K08269+K07207+K07207+K07207+K08267+K08267+K06276+K04373+K08266+K08266+K02649+K00922+K07207+K08269+K07206+K06276+K06276+K07198+K03258+K00922+K07298+K08272+K00922+K04365+K03259+K08267+K08267+K08271+K00922+K07207
Apoptosis	ko04210	66	TR10182_c0_g1;TR10328_c1_g1;TR10668_c0_g1;TR10668_c5_g1;TR10709_c2_g2;TR11329_c0_g1;TR14507_c0_g1;TR14734_c1_g1;TR14827_c0_g1;TR15058_c0_g1;TR16740_c0_g2;TR17592_c0_g1;TR18929_c1_g1;TR2351_c0_g1;TR23522_c0_g1;TR24959_c0_g1;TR25185_c0_g1;TR2534_c0_g1;TR25356_c0_g1;TR25356_c0_g2;TR2561_c0_g2;TR25981_c0_g1;TR26175_c0_g1;TR26607_c0_g1;TR26824_c1_g1;TR26991_c0_g2;TR27054_c0_g1;TR27529_c0_g1;TR28796_c0…	K04725+K04397+K04467+K04467+K04725+K04725+K02649+K04729+K02649+K03173+K04725+K04729+K04725+K04400+K02161+K04721+K04721+K02580+K04725+K04725+K04396+K06268+K04397+K02159+K04725+K02580+K04725+K04725+K02861+K04725+K04725+K04725+K04399+K04397+K04397+K08738+K08738+K04723+K04725+K04733+K04397+K02373+K04725+K04466+K04725+K02187+K04733+K04721+K04725+K02373+K04399+K04397+K00922+K04727+K04725+K04729+K02187+…
Cardiac muscle contraction	ko04260	9	TR13838_c0_g1;TR15000_c0_g1;TR20933_c0_g1;TR24714_c1_g1;TR41579_c0_g1;TR43405_c0_g1;TR58575_c0_g1;TR58641_c0_g1;TR999_c1_g1;	K00418+K02262+K00411+K02262+K05742+K02262+K02256+K04870+K00416
Vascular smooth muscle contraction	ko04270	48	TR1015_c0_g1;TR1015_c0_g2;TR105_c0_g1;TR11841_c0_g1;TR13444_c0_g1;TR14385_c0_g1;TR14502_c0_g1;TR15663_c0_g1;TR16978_c0_g1;TR19183_c0_g1;TR19661_c0_g1;TR20259_c0_g1;TR21109_c0_g1;TR21771_c2_g1;TR23028_c0_g1;TR23496_c0_g1;TR23900_c3_g1;TR24538_c0_g1;TR25496_c1_g2;TR26248_c1_g1;TR26503_c0_g1;TR27223_c0_g1;TR2759_c0_g1;TR2826_c0_g1;TR35176_c0_g1;TR3786_c0_g1;TR42726_c1_g1;TR45148_c0_g1;TR45270_c0_g2;…	K02183+K02183+K02183+K08049+K02183+K04346+K01047+K02183+K02183+K02183+K01047+K04958+K02183+K12337+K02183+K07425+K00907+K02183+K07425+K12318+K02183+K02183+K02183+K02183+K02183+K08045+K02183+K01047+K01047+K01047+K04577+K04958+K04958+K12755+K12755+K02183+K02183+K02183+K02183+K08042+K02183+K02183+K02183+K02183+K05242+K06270+K05858+K06269
Wnt signaling pathway	ko04310	117	TR10554_c0_g1;TR11422_c1_g1;TR11571_c0_g1;TR1229_c0_g1;TR13352_c0_g1;TR15700_c0_g1;TR16205_c0_g1;TR16205_c0_g2;TR16205_c1_g1;TR16428_c0_g3;TR17290_c4_g1;TR17522_c0_g1;TR18786_c1_g1;TR18806_c0_g1;TR19967_c0_g1;TR20283_c0_g1;TR20283_c0_g2;TR20283_c0_g3;TR21404_c19_g1;TR21775_c0_g1;TR21775_c0_g2;TR22525_c0_g1;TR22751_c0_g1;TR23208_c0_g1;TR23208_c1_g1;TR23284_c9_g12;TR23550_c0_g1;TR23774_c6_g1;TR2387…	K04348+K04427+K04392+K03115+K04498+K04498+K02157+K02157+K02157+K04514+K04498+K02235+K04440+K04507+K03068+K04392+K04392+K04392+K04377+K04448+K04448+K02677+K03868+K04446+K04446+K11584+K03213+K04392+K04494+K01691+K04498+K06268+K08957+K03362+K04505+K03068+K04514+K00445+K00445+K04506+K04392+K02353+K11584+K04495+K03097+K04427+K04512+K04512+K00714+K04382+K04498+K00182+K06268+K03068+K02085+K04513+K02375+…
Dorso-ventral axis formation	ko04320	38	TR1635_c0_g1;TR18017_c0_g1;TR20736_c0_g1;TR21120_c0_g1;TR2307_c0_g1;TR28299_c1_g1;TR31203_c0_g2;TR32750_c0_g1;TR33227_c0_g1;TR34556_c0_g1;TR367_c0_g1;TR36935_c0_g1;TR39366_c0_g1;TR39850_c0_g1;TR41012_c0_g1;TR41858_c0_g1;TR45238_c0_g1;TR45238_c1_g1;TR4731_c0_g1;TR47458_c0_g1;TR4923_c1_g1;TR4923_c2_g1;TR49367_c0_g1;TR49616_c0_g1;TR50720_c0_g1;TR51557_c0_g1;TR55264_c0_g2;TR55701_c0_g1;TR56128_c0_g2;…	K02599+K04361+K04361+K04368+K02599+K04371+K02184+K02602+K02184+K07827+K02678+K02599+K03099+K02156+K02359+K02156+K02098+K02098+K04364+K02599+K02644+K02644+K02098+K02156+K04361+K02599+K02599+K02678+K02644+K02156+K02599+K02359+K02599+K04361+K02599+K02599+K02599+K02599
Notch signaling pathway	ko04330	55	TR10456_c3_g1;TR10621_c2_g1;TR10823_c0_g1;TR10951_c0_g1;TR11054_c0_g1;TR12567_c0_g1;TR13352_c0_g1;TR15397_c0_g1;TR15700_c0_g1;TR1635_c0_g1;TR17290_c4_g1;TR2307_c0_g1;TR25206_c0_g1;TR25750_c0_g1;TR25865_c0_g1;TR26199_c0_g1;TR26827_c0_g1;TR2785_c0_g2;TR27869_c0_g1;TR27869_c0_g2;TR29307_c0_g1;TR29317_c0_g1;TR33306_c1_g1;TR34988_c0_g1;TR35386_c0_g1;TR36935_c0_g1;TR38416_c0_g1;TR39244_c0_g1;TR39271_c0…	K06058+K06067+K06059+K06051+K06058+K06059+K04498+K06053+K04498+K02599+K04498+K02599+K06058+K04498+K06062+K06052+K04505+K06058+K05948+K05948+K06171+K02353+K04498+K06170+K06051+K02599+K04498+K06061+K04496+K06172+K06058+K04498+K04498+K02599+K06066+K06059+K06063+K02599+K06054+K06051+K06057+K06066+K02599+K06051+K02599+K04498+K04498+K06051+K06058+K06058+K02599+K02599+K02599+K02599+K02599
Hedgehog signaling pathway	ko04340	28	TR1046_c0_g1;TR1046_c0_g2;TR14025_c0_g1;TR16957_c0_g1;TR18798_c0_g1;TR23058_c0_g1;TR25990_c0_g1;TR26184_c0_g1;TR2803_c0_g1;TR2803_c1_g1;TR32107_c0_g1;TR34073_c0_g1;TR39094_c0_g1;TR40302_c5_g1;TR41025_c0_g2;TR41884_c0_g1;TR4275_c0_g1;TR4275_c0_g2;TR4275_c1_g1;TR43551_c0_g1;TR43551_c1_g1;TR43643_c0_g2;TR46422_c0_g1;TR51014_c0_g1;TR51740_c1_g1;TR53734_c0_g1;TR5468_c0_g1;TR5468_c0_g2;	K08959+K08959+K06225+K04662+K08958+K06229+K08957+K03362+K00445+K00445+K00714+K00182+K04663+K04345+K08957+K06228+K00444+K00444+K01384+K01064+K01064+K06234+K06233+K06226+K06229+K04663+K06230+K06230
TGF-beta signaling pathway	ko04350	51	TR13352_c0_g1;TR15682_c0_g1;TR15682_c1_g1;TR15700_c0_g1;TR16428_c0_g3;TR16480_c0_g1;TR16957_c0_g1;TR17290_c4_g1;TR18258_c0_g1;TR21063_c0_g1;TR21404_c19_g1;TR22497_c1_g1;TR22497_c2_g1;TR22751_c0_g1;TR23217_c0_g1;TR25750_c0_g1;TR25807_c0_g2;TR2768_c0_g1;TR28299_c1_g1;TR29619_c0_g2;TR29837_c0_g1;TR30597_c0_g1;TR33201_c0_g1;TR33306_c1_g1;TR33416_c0_g1;TR36094_c0_g1;TR36514_c0_g1;TR38416_c0_g1;TR38538…	K04498+K04675+K04675+K04498+K04514+K04661+K04662+K04498+K04688+K04666+K04377+K04659+K04659+K03868+K04659+K04498+K04659+K04514+K04371+K13578+K04679+K04659+K04382+K04498+K04677+K04513+K04671+K04498+K04513+K04670+K04663+K04514+K04659+K04676+K04498+K04498+K03094+K03456+K04513+K04678+K03347+K04682+K04681+K04500+K04663+K04680+K13596+K04498+K04498+K04501+K04501
Axon guidance	ko04360	14	TR10144_c0_g1;TR11571_c0_g1;TR14712_c0_g2;TR17266_c0_g1;TR20040_c0_g1;TR20815_c0_g2;TR23208_c0_g1;TR32372_c0_g1;TR34000_c0_g1;TR36677_c0_g1;TR38661_c0_g1;TR45746_c0_g1;TR48656_c0_g1;TR48811_c0_g2;	K02090+K04392+K07524+K06550+K05719+K05102+K04446+K06821+K07524+K06550+K06821+K06753+K05725+K06753
VEGF signaling pathway	ko04370	21	TR10156_c0_g2;TR11571_c0_g1;TR14502_c0_g1;TR14507_c0_g1;TR14827_c0_g1;TR19661_c0_g1;TR23208_c0_g1;TR23208_c1_g1;TR25981_c0_g1;TR3004_c0_g1;TR36170_c0_g1;TR40628_c0_g1;TR45148_c0_g1;TR45270_c0_g2;TR45270_c1_g1;TR48500_c0_g1;TR48656_c0_g1;TR50914_c0_g1;TR5229_c0_g1;TR55032_c0_g1;TR8899_c0_g1;	K04393+K04392+K01047+K02649+K02649+K01047+K04446+K04446+K06268+K04399+K05760+K04718+K01047+K01047+K01047+K04399+K05725+K00922+K04392+K04392+K11987
Osteoclast differentiation	ko04380	9	TR10668_c0_g1;TR11571_c0_g1;TR14827_c0_g1;TR24016_c0_g1;TR2419_c0_g1;TR2534_c0_g1;TR29868_c0_g1;TR30739_c0_g1;TR50914_c0_g1;	K04467+K04392+K02649+K04404+K01371+K02580+K04431+K08008+K00922
Focal adhesion	ko04510	88	TR10156_c0_g2;TR10182_c0_g1;TR10709_c2_g2;TR11329_c0_g1;TR11571_c0_g1;TR12941_c0_g1;TR14507_c0_g1;TR14827_c0_g1;TR16015_c0_g1;TR1606_c0_g1;TR16447_c0_g1;TR16740_c0_g2;TR17245_c0_g2;TR18929_c1_g1;TR20040_c0_g1;TR20683_c0_g1;TR21775_c0_g1;TR22041_c0_g1;TR23217_c0_g1;TR23522_c0_g1;TR23900_c3_g1;TR25356_c0_g1;TR25356_c0_g2;TR25371_c0_g1;TR25807_c0_g2;TR26168_c0_g1;TR26209_c1_g2;TR26824_c1_g1;TR27054_…	K04393+K04725+K04725+K04725+K04392+K06584+K02649+K02649+K05096+K06249+K06483+K04725+K06238+K04725+K05719+K06238+K04448+K05637+K04659+K02161+K00907+K04725+K04725+K06585+K04659+K06237+K06278+K04725+K04725+K04725+K06238+K04725+K04725+K04725+K06483+K04437+K04437+K04437+K06236+K05730+K04725+K06249+K06249+K03900+K06237+K06274+K05760+K06238+K06238+K06276+K04659+K01110+K04725+K04437+K04725+K06483+K04725+…
ECM-receptor interaction	ko04512	88	TR11124_c0_g1;TR11156_c0_g1;TR11156_c1_g1;TR12941_c0_g1;TR13598_c0_g1;TR1606_c0_g1;TR16447_c0_g1;TR17245_c0_g2;TR17629_c0_g1;TR17629_c1_g1;TR20040_c0_g1;TR20683_c0_g1;TR22041_c0_g1;TR22497_c1_g1;TR22497_c2_g1;TR23217_c0_g1;TR25371_c0_g1;TR25807_c0_g2;TR26168_c0_g1;TR27907_c0_g1;TR27907_c1_g1;TR28492_c1_g1;TR28500_c0_g1;TR30109_c0_g1;TR30597_c0_g1;TR31005_c0_g1;TR31005_c0_g2;TR3252_c0_g1;TR32572_c…	K06254+K06254+K06254+K06584+K05635+K06249+K06483+K06238+K05637+K05637+K05719+K06238+K05637+K04659+K04659+K04659+K06585+K04659+K06237+K06254+K06254+K06238+K06254+K06483+K04659+K06254+K06254+K06236+K06252+K06265+K06249+K06249+K06249+K03900+K06260+K06237+K06236+K05635+K06267+K06238+K06238+K06236+K06236+K04659+K06254+K06267+K06255+K06255+K05637+K06267+K06584+K06240+K06240+K06483+K06584+K06257+K06240+…
Cell adhesion molecules (CAMs)	ko04514	43	TR10670_c0_g1;TR12941_c0_g1;TR15140_c0_g1;TR16447_c0_g1;TR17266_c0_g1;TR18076_c0_g1;TR20040_c0_g1;TR213_c1_g1;TR21762_c1_g1;TR21762_c1_g2;TR23256_c1_g1;TR23724_c0_g1;TR2527_c0_g1;TR25371_c0_g1;TR26833_c0_g1;TR27678_c0_g1;TR29526_c0_g1;TR30109_c0_g1;TR30140_c0_g1;TR3238_c0_g1;TR33033_c0_g1;TR33047_c0_g1;TR34421_c0_g1;TR36677_c0_g1;TR39962_c0_g1;TR44713_c0_g1;TR46926_c0_g1;TR46998_c0_g1;TR4709_c0_g…	K06491+K06584+K06781+K06483+K06550+K07378+K05719+K07378+K06780+K06780+K07377+K05695+K06087+K06585+K06467+K06592+K05693+K06483+K06766+K06816+K07378+K07377+K05718+K06550+K06547+K06483+K06485+K06478+K06087+K06483+K06483+K06483+K07378+K06089+K07378+K06478+K07378+K07378+K06467+K06491+K06467+K05695+K07378
Adherens junction	ko04520	23	TR10156_c0_g2;TR10170_c0_g1;TR11571_c0_g1;TR1229_c0_g1;TR20310_c0_g1;TR23724_c0_g1;TR27678_c0_g1;TR29526_c0_g1;TR30134_c1_g1;TR33210_c0_g1;TR33210_c0_g2;TR38251_c5_g1;TR39079_c1_g1;TR40559_c0_g1;TR48726_c2_g3;TR5229_c0_g1;TR55032_c0_g1;TR57310_c0_g1;TR6199_c0_g1;TR6576_c0_g1;TR6869_c0_g1;TR7298_c1_g1;TR9019_c0_g1;	K04393+K05747+K04392+K03115+K05694+K05695+K06592+K05693+K04427+K05747+K05747+K05705+K04468+K05698+K04500+K04392+K04392+K04498+K06084+K04362+K05695+K04527+K04361
Tight junction	ko04530	23	TR10156_c0_g2;TR1229_c0_g1;TR14703_c0_g1;TR19310_c0_g1;TR2527_c0_g1;TR25918_c0_g1;TR3076_c0_g1;TR38251_c5_g1;TR38526_c0_g1;TR39240_c0_g1;TR39452_c0_g1;TR39729_c1_g1;TR42425_c0_g1;TR44285_c0_g1;TR45807_c0_g1;TR45861_c0_g2;TR45861_c1_g1;TR46148_c0_g3;TR46148_c0_g4;TR46192_c0_g1;TR4709_c0_g1;TR49325_c0_g2;TR50133_c2_g1;	K04393+K03115+K06101+K06095+K06087+K10352+K04424+K05705+K06103+K06111+K06106+K01110+K06103+K06109+K06069+K06095+K06095+K12755+K12755+K03456+K06087+K06089+K10352
Gap junction	ko04540	19	TR11841_c0_g1;TR1565_c0_g1;TR20259_c0_g1;TR26248_c1_g1;TR28081_c0_g2;TR32357_c0_g1;TR32446_c0_g1;TR32788_c0_g1;TR32788_c1_g1;TR3786_c0_g1;TR38613_c0_g1;TR44705_c0_g1;TR4510_c0_g1;TR45818_c0_g1;TR45818_c1_g1;TR4638_c0_g1;TR48104_c0_g1;TR6369_c0_g1;TR9019_c0_g1;	K08049+K04463+K04958+K12318+K07374+K07375+K04463+K07376+K07376+K08045+K04464+K04157+K04145+K04958+K04958+K04604+K08042+K05858+K04361
Complement and coagulation cascades	ko04610	19	TR10241_c0_g1;TR10839_c0_g1;TR11680_c0_g1;TR13658_c0_g1;TR16759_c0_g1;TR16759_c0_g2;TR16823_c0_g2;TR20048_c0_g1;TR20048_c0_g2;TR26668_c0_g1;TR31795_c0_g1;TR35012_c2_g1;TR36040_c4_g1;TR36957_c0_g1;TR49032_c0_g1;TR49206_c0_g2;TR57665_c0_g1;TR7541_c0_g1;TR7541_c0_g2;	K04004+K04004+K03991+K03988+K03994+K03994+K03994+K01315+K01315+K03994+K01335+K03900+K04004+K01315+K04004+K03988+K03987+K03994+K03994
Antigen processing and presentation	ko04612	5	TR16588_c0_g1;TR20639_c0_g2;TR26889_c0_g1;TR48696_c5_g6;TR55613_c0_g1;	K08065+K01368+K04079+K08054+K08064
Renin-angiotensin system	ko04614	8	TR29834_c4_g1;TR32038_c0_g1;TR46696_c0_g1;TR48120_c0_g1;TR48678_c2_g2;TR57487_c0_g1;TR7314_c1_g1;TR9729_c0_g1;	K13289+K11140+K01283+K01392+K01283+K11140+K11141+K11141
Toll-like receptor signaling pathway	ko04620	36	TR10668_c0_g1;TR10668_c5_g1;TR11571_c0_g1;TR14507_c0_g1;TR14734_c1_g1;TR14827_c0_g1;TR17554_c0_g1;TR17592_c0_g1;TR20764_c0_g1;TR21775_c0_g1;TR24016_c0_g1;TR2419_c0_g1;TR25129_c0_g1;TR2534_c0_g1;TR26670_c0_g2;TR26991_c0_g2;TR28796_c0_g1;TR28952_c1_g1;TR29868_c0_g1;TR30134_c1_g1;TR34512_c0_g1;TR37404_c0_g1;TR42014_c0_g1;TR42014_c0_g2;TR44781_c0_g1;TR45333_c1_g2;TR48244_c1_g1;TR50914_c0_g1;TR5229_c0…	K04467+K04467+K04392+K02649+K04729+K02649+K05401+K04729+K10160+K04448+K04404+K01371+K04430+K02580+K05410+K02580+K02861+K10160+K04431+K04427+K04733+K02373+K05401+K05401+K04733+K05410+K02373+K00922+K04392+K04729+K04392+K04730+K05401+K05401+K02580+K02861
NOD-like receptor signaling pathway	ko04621	36	TR10182_c0_g1;TR10441_c2_g1;TR10668_c0_g1;TR10668_c5_g1;TR10709_c2_g2;TR11329_c0_g1;TR11329_c0_g2;TR16740_c0_g2;TR18929_c1_g1;TR24016_c0_g1;TR2534_c0_g1;TR25356_c0_g1;TR25356_c0_g2;TR26824_c1_g1;TR26889_c0_g1;TR26991_c0_g2;TR27054_c0_g1;TR27529_c0_g1;TR29083_c0_g1;TR29338_c4_g1;TR29535_c1_g2;TR30134_c1_g1;TR33500_c0_g1;TR39595_c0_g2;TR40280_c0_g1;TR42328_c0_g2;TR43707_c0_g1;TR46075_c0_g1;TR52140_…	K04725+K12796+K04467+K04467+K04725+K04725+K12807+K04725+K04725+K04404+K02580+K04725+K04725+K04725+K04079+K02580+K04725+K04725+K04725+K04725+K04725+K04427+K04725+K12807+K04725+K04725+K12804+K04725+K04725+K12807+K04725+K04725+K04725+K02580+K04725+K04725
RIG-I-like receptor signaling pathway	ko04622	45	TR10103_c0_g1;TR10408_c0_g1;TR10408_c0_g2;TR10668_c0_g1;TR10668_c5_g1;TR13916_c0_g1;TR14697_c1_g1;TR14697_c1_g2;TR15058_c0_g1;TR16633_c0_g1;TR16903_c0_g1;TR17830_c0_g1;TR20900_c0_g1;TR21755_c0_g1;TR2351_c0_g1;TR2531_c0_g1;TR2534_c0_g1;TR25670_c0_g1;TR26670_c0_g2;TR26896_c0_g2;TR26991_c0_g2;TR27705_c0_g1;TR28455_c0_g1;TR28796_c0_g1;TR29291_c1_g1;TR29300_c0_g1;TR30134_c1_g1;TR30740_c0_g1;TR31605_c0…	K10652+K12646+K12646+K04467+K04467+K10652+K08336+K08336+K03173+K04416+K12654+K12648+K04416+K12654+K04400+K12654+K02580+K04416+K05410+K12647+K02580+K10652+K10652+K02861+K12647+K11594+K04427+K12654+K10652+K12646+K02373+K10652+K10652+K05410+K12654+K02373+K12646+K12646+K12646+K12654+K12654+K12647+K12646+K02580+K02861
Cytosolic DNA-sensing pathway	ko04623	36	TR10408_c0_g1;TR10408_c0_g2;TR10668_c0_g1;TR10668_c5_g1;TR12177_c0_g1;TR16903_c0_g1;TR17830_c0_g1;TR20726_c0_g1;TR21755_c0_g1;TR23919_c0_g1;TR2531_c0_g1;TR2534_c0_g1;TR25437_c0_g1;TR26670_c0_g2;TR26991_c0_g2;TR28501_c0_g1;TR28796_c0_g1;TR30740_c0_g1;TR35971_c0_g1;TR3821_c0_g1;TR38890_c0_g1;TR39331_c0_g1;TR45333_c1_g2;TR46043_c0_g2;TR47948_c0_g1;TR49939_c0_g1;TR50490_c0_g1;TR53936_c0_g1;TR55309_c0…	K12646+K12646+K04467+K04467+K03023+K12654+K12648+K03026+K12654+K03018+K12654+K02580+K03022+K05410+K02580+K03007+K02861+K12654+K12646+K03016+K12968+K03021+K05410+K12654+K03019+K12646+K03027+K12646+K12646+K12654+K12654+K03009+K03009+K12646+K02580+K02861
Jak-STAT signaling pathway	ko04630	42	TR10460_c0_g1;TR10640_c6_g1;TR13352_c0_g1;TR14370_c0_g1;TR14507_c0_g1;TR14827_c0_g1;TR14972_c0_g2;TR15700_c0_g1;TR16474_c1_g1;TR17290_c4_g1;TR19113_c0_g1;TR19113_c0_g2;TR21404_c19_g1;TR2309_c0_g1;TR23727_c0_g1;TR25750_c0_g1;TR25850_c0_g1;TR28559_c0_g1;TR33306_c1_g1;TR38416_c0_g1;TR39366_c0_g1;TR40597_c0_g1;TR4179_c0_g1;TR4179_c1_g1;TR43154_c0_g1;TR44587_c0_g1;TR44670_c1_g1;TR45516_c0_g1;TR46852_c…	K04705+K11222+K04498+K04706+K02649+K02649+K04706+K04498+K05064+K04498+K04456+K04456+K04377+K00922+K11224+K04498+K00922+K04447+K04498+K04498+K03099+K11224+K04498+K04498+K04707+K02649+K00922+K04707+K04704+K04364+K04703+K11224+K00922+K07293+K00922+K04498+K04699+K04498+K10151+K07293+K00922+K04700
Hematopoietic cell lineage	ko04640	17	TR19215_c0_g1;TR26120_c0_g1;TR30109_c0_g1;TR32038_c0_g1;TR35078_c0_g1;TR37665_c0_g1;TR44713_c0_g1;TR46926_c0_g1;TR47607_c0_g2;TR48105_c0_g2;TR48105_c0_g3;TR52387_c0_g1;TR53174_c0_g1;TR53174_c0_g2;TR57487_c0_g1;TR57690_c0_g1;TR7315_c3_g1;	K06503+K06468+K06483+K11140+K06260+K06468+K06483+K06485+K06483+K06483+K06483+K06261+K06460+K06460+K11140+K06467+K06468
Natural killer cell mediated cytotoxicity	ko04650	51	TR10554_c0_g1;TR10627_c9_g1;TR11571_c0_g1;TR14507_c0_g1;TR14787_c1_g1;TR14787_c1_g2;TR14827_c0_g1;TR16232_c0_g1;TR20283_c0_g1;TR20283_c0_g2;TR20283_c0_g3;TR21120_c0_g1;TR22525_c0_g1;TR2309_c0_g1;TR23208_c0_g1;TR23208_c1_g1;TR23774_c6_g1;TR24959_c0_g1;TR25185_c0_g1;TR25850_c0_g1;TR25981_c0_g1;TR26844_c0_g1;TR28299_c1_g1;TR28752_c0_g1;TR32819_c0_g1;TR32826_c0_g1;TR34421_c0_g1;TR34556_c0_g1;TR34587_…	K04348+K06279+K04392+K02649+K04721+K04721+K02649+K04409+K04392+K04392+K04392+K04368+K02677+K00922+K04446+K04446+K04392+K04721+K04721+K00922+K06268+K07984+K04371+K04392+K05730+K05855+K05718+K07827+K06268+K03099+K07984+K02187+K02649+K06268+K00922+K04721+K05859+K05859+K05859+K04364+K00922+K07293+K04392+K04392+K04392+K00922+K04365+K02187+K02187+K07293+K00922
T cell receptor signaling pathway	ko04660	8	TR10668_c0_g1;TR14827_c0_g1;TR23208_c0_g1;TR2534_c0_g1;TR29868_c0_g1;TR35307_c0_g1;TR46998_c0_g1;TR50914_c0_g1;	K04467+K02649+K04446+K02580+K04431+K12076+K06478+K00922
B cell receptor signaling pathway	ko04662	8	TR10668_c0_g1;TR11571_c0_g1;TR14827_c0_g1;TR181_c0_g1;TR23208_c0_g1;TR2534_c0_g1;TR50914_c0_g1;TR57690_c0_g1;	K04467+K04392+K02649+K12229+K04446+K02580+K00922+K06467
Fc epsilon RI signaling pathway	ko04664	5	TR11571_c0_g1;TR14827_c0_g1;TR29868_c0_g1;TR45148_c0_g1;TR50914_c0_g1;	K04392+K02649+K04431+K01047+K00922
Fc gamma R-mediated phagocytosis	ko04666	8	TR10170_c0_g1;TR11571_c0_g1;TR14827_c0_g1;TR32844_c0_g1;TR33210_c0_g1;TR33210_c0_g2;TR46998_c0_g1;TR50914_c0_g1;	K05747+K04392+K02649+K12559+K05747+K05747+K06478+K00922
Leukocyte transendothelial migration	ko04670	19	TR11571_c0_g1;TR14827_c0_g1;TR20040_c0_g1;TR20756_c1_g1;TR2527_c0_g1;TR30109_c0_g1;TR30739_c0_g1;TR34421_c0_g1;TR36170_c0_g1;TR44713_c0_g1;TR4709_c0_g1;TR47607_c0_g2;TR48105_c0_g2;TR48105_c0_g3;TR48404_c0_g2;TR48656_c0_g1;TR49325_c0_g2;TR50914_c0_g1;TR658_c0_g1;	K04392+K02649+K05719+K04351+K06087+K06483+K08008+K05718+K05760+K06483+K06087+K06483+K06483+K06483+K08016+K05725+K06089+K00922+K07293
Intestinal immune network for IgA production	ko04672	8	TR16447_c0_g1;TR30109_c0_g1;TR41293_c0_g1;TR44713_c0_g1;TR47607_c0_g2;TR48105_c0_g2;TR48105_c0_g3;TR9397_c0_g1;	K06483+K06483+K04466+K06483+K06483+K06483+K06483+K05475
Circadian rhythm - mammal	ko04710	18	TR1046_c0_g1;TR1046_c0_g2;TR14341_c0_g1;TR22643_c0_g1;TR26184_c0_g1;TR26667_c0_g1;TR26716_c0_g1;TR2857_c0_g1;TR3264_c0_g2;TR37776_c0_g1;TR38450_c0_g1;TR43442_c0_g1;TR45191_c0_g2;TR47626_c0_g1;TR49357_c0_g1;TR49357_c0_g2;TR50780_c0_g1;TR55588_c0_g1;	K08959+K08959+K02633+K02633+K03362+K02223+K03728+K03728+K08532+K03728+K08532+K02296+K03728+K03347+K02295+K02295+K02223+K02633
Circadian rhythm - fly	ko04711	7	TR12344_c0_g1;TR14341_c0_g1;TR18802_c0_g1;TR26667_c0_g1;TR50780_c0_g1;TR55588_c0_g1;TR9615_c0_g3;	K09057+K02633+K12114+K02223+K02223+K02633+K12074
Long-term potentiation	ko04720	25	TR1015_c0_g1;TR1015_c0_g2;TR13444_c0_g1;TR15663_c0_g1;TR16978_c0_g1;TR19183_c0_g1;TR1933_c0_g1;TR21412_c3_g1;TR23028_c0_g1;TR24538_c0_g1;TR26503_c0_g1;TR27223_c0_g1;TR2826_c0_g1;TR35176_c0_g1;TR42726_c1_g1;TR45818_c0_g1;TR46686_c0_g1;TR46686_c0_g2;TR47952_c0_g1;TR47952_c0_g2;TR49130_c1_g1;TR51740_c4_g1;TR54539_c1_g1;TR57310_c0_g1;TR6369_c0_g1;	K02183+K02183+K02183+K02183+K02183+K02183+K05198+K04373+K02183+K02183+K02183+K02183+K02183+K02183+K02183+K04958+K02183+K02183+K02183+K02183+K02183+K02183+K06270+K04498+K05858
Neurotrophin signaling pathway	ko04722	34	TR1015_c0_g1;TR1015_c0_g2;TR11571_c0_g1;TR13444_c0_g1;TR14812_c0_g1;TR14827_c0_g1;TR15663_c0_g1;TR16633_c0_g1;TR16978_c0_g1;TR19183_c0_g1;TR20738_c0_g1;TR21412_c3_g1;TR23028_c0_g1;TR24538_c0_g1;TR2534_c0_g1;TR25670_c0_g1;TR26503_c0_g1;TR27223_c0_g1;TR2826_c0_g1;TR29266_c0_g2;TR29868_c0_g1;TR35176_c0_g1;TR42726_c1_g1;TR44781_c0_g1;TR46686_c0_g1;TR46686_c0_g2;TR47952_c0_g1;TR47952_c0_g2;TR49130_c1_…	K02183+K02183+K04392+K02183+K12460+K02649+K02183+K04416+K02183+K02183+K12388+K04373+K02183+K02183+K02580+K04416+K02183+K02183+K02183+K12463+K04431+K02183+K02183+K04733+K02183+K02183+K02183+K02183+K02183+K00922+K02183+K04445+K07293+K05728
Long-term depression	ko04730	9	TR14385_c0_g1;TR1933_c0_g1;TR26248_c1_g1;TR32788_c0_g1;TR32788_c1_g1;TR45148_c0_g1;TR45818_c0_g1;TR46192_c0_g1;TR6369_c0_g1;	K04346+K05198+K12318+K07376+K07376+K01047+K04958+K03456+K05858
Olfactory transduction	ko04740	22	TR1015_c0_g1;TR1015_c0_g2;TR13444_c0_g1;TR15663_c0_g1;TR16978_c0_g1;TR19183_c0_g1;TR23028_c0_g1;TR24538_c0_g1;TR26503_c0_g1;TR27223_c0_g1;TR2826_c0_g1;TR32788_c0_g1;TR32788_c1_g1;TR35176_c0_g1;TR42726_c1_g1;TR46686_c0_g1;TR46686_c0_g2;TR47952_c0_g1;TR47952_c0_g2;TR49130_c1_g1;TR50090_c0_g1;TR51740_c4_g1;	K02183+K02183+K02183+K02183+K02183+K02183+K02183+K02183+K02183+K02183+K02183+K07376+K07376+K02183+K02183+K02183+K02183+K02183+K02183+K02183+K05030+K02183
Taste transduction	ko04742	1	TR10731_c0_g1;	K04626
Phototransduction	ko04744	25	TR1015_c0_g1;TR1015_c0_g2;TR105_c0_g1;TR13444_c0_g1;TR15663_c0_g1;TR16978_c0_g1;TR19183_c0_g1;TR21109_c0_g1;TR23028_c0_g1;TR24538_c0_g1;TR26503_c0_g1;TR27223_c0_g1;TR2759_c0_g1;TR2826_c0_g1;TR30087_c0_g1;TR35176_c0_g1;TR42726_c1_g1;TR46686_c0_g1;TR46686_c0_g2;TR47952_c0_g1;TR47952_c0_g2;TR49130_c1_g1;TR49986_c0_g1;TR49986_c0_g2;TR51740_c4_g1;	K02183+K02183+K02183+K02183+K02183+K02183+K02183+K02183+K02183+K02183+K02183+K02183+K02183+K02183+K04948+K02183+K02183+K02183+K02183+K02183+K02183+K02183+K02183+K02183+K02183
Phototransduction - fly	ko04745	15	TR13982_c0_g1;TR22525_c0_g1;TR23802_c0_g1;TR25253_c0_g1;TR30566_c0_g1;TR40894_c0_g1;TR45332_c0_g1;TR45818_c2_g1;TR51640_c1_g1;TR54077_c0_g1;TR7700_c0_g1;TR9357_c0_g1;TR9357_c0_g2;TR9357_c2_g2;TR9357_c2_g4;	K13806+K02677+K02183+K02183+K02183+K02183+K08834+K02522+K02522+K05328+K04515+K05858+K05858+K05858+K05858
Regulation of actin cytoskeleton	ko04810	48	TR10156_c0_g2;TR10170_c0_g1;TR11571_c0_g1;TR12941_c0_g1;TR14385_c0_g1;TR14507_c0_g1;TR14827_c0_g1;TR15850_c0_g1;TR16447_c0_g1;TR20040_c0_g1;TR20643_c0_g1;TR23900_c3_g1;TR25371_c0_g1;TR26992_c1_g1;TR29636_c0_g1;TR30109_c0_g1;TR31989_c0_g2;TR32813_c0_g1;TR32819_c0_g1;TR33099_c0_g1;TR33210_c0_g1;TR33210_c0_g2;TR34421_c0_g1;TR36170_c0_g1;TR3850_c0_g1;TR41579_c0_g1;TR44713_c0_g1;TR44873_c0_g1;TR45185_…	K04393+K05747+K04392+K06584+K04346+K02649+K02649+K05756+K06483+K05719+K13710+K00907+K06585+K05757+K00921+K06483+K05767+K05762+K05730+K05746+K05747+K05747+K05718+K05760+K02085+K05742+K06483+K05746+K05752+K12755+K12755+K13708+K06485+K06483+K06483+K06483+K05725+K00922+K04392+K05741+K05094+K06270+K04392+K06269+K04362+K05749+K05728+K04361
Insulin signaling pathway	ko04910	51	TR1015_c0_g1;TR1015_c0_g2;TR105_c0_g1;TR12871_c1_g1;TR13444_c0_g1;TR13631_c0_g1;TR13870_c0_g1;TR14160_c0_g1;TR14507_c0_g1;TR14827_c0_g1;TR15663_c0_g1;TR15935_c0_g1;TR15935_c1_g1;TR16978_c0_g1;TR17260_c1_g2;TR18258_c0_g1;TR19183_c0_g1;TR20200_c0_g1;TR21109_c0_g1;TR21819_c1_g1;TR23028_c0_g1;TR23724_c0_g1;TR24538_c0_g1;TR26503_c0_g1;TR27223_c0_g1;TR2759_c0_g1;TR2826_c0_g1;TR31751_c0_g1;TR32637_c0_g1…	K02183+K02183+K02183+K07190+K02183+K07204+K07205+K03259+K02649+K02649+K02183+K00665+K00665+K02183+K00688+K04688+K02183+K02991+K02183+K07204+K02183+K05695+K02183+K02183+K02183+K02183+K02183+K07207+K13296+K02183+K07207+K00665+K06276+K00665+K02183+K07194+K06069+K07206+K02183+K02183+K02183+K02183+K02183+K02183+K02183+K00922+K02183+K06269+K05695+K04527+K11262
GnRH signaling pathway	ko04912	48	TR10156_c0_g2;TR1015_c0_g1;TR1015_c0_g2;TR105_c0_g1;TR11841_c0_g1;TR13444_c0_g1;TR14502_c0_g1;TR15663_c0_g1;TR16633_c0_g1;TR16978_c0_g1;TR19183_c0_g1;TR19661_c0_g1;TR20259_c0_g1;TR20900_c0_g1;TR21109_c0_g1;TR21775_c0_g1;TR23028_c0_g1;TR24538_c0_g1;TR25129_c0_g1;TR25670_c0_g1;TR26503_c0_g1;TR27223_c0_g1;TR2759_c0_g1;TR2826_c0_g1;TR29868_c0_g1;TR3497_c0_g1;TR35176_c0_g1;TR3786_c0_g1;TR38613_c0_g1;T…	K04393+K02183+K02183+K02183+K08049+K02183+K01047+K02183+K04416+K02183+K02183+K01047+K04958+K04416+K02183+K04448+K02183+K02183+K04430+K04416+K02183+K02183+K02183+K02183+K04431+K04280+K02183+K08045+K04464+K08522+K04428+K02183+K01047+K01047+K01047+K04958+K04958+K02183+K02183+K02183+K02183+K08042+K02183+K02183+K02183+K02183+K05858+K04361
Progesterone-mediated oocyte maturation	ko04914	72	TR10677_c0_g1;TR10677_c0_g2;TR10678_c1_g2;TR11841_c0_g1;TR11841_c0_g2;TR12306_c0_g1;TR14507_c0_g1;TR14827_c0_g1;TR15789_c0_g1;TR16733_c0_g1;TR18786_c1_g1;TR19113_c0_g1;TR19113_c0_g2;TR19949_c0_g1;TR20562_c0_g1;TR20562_c1_g1;TR21120_c0_g1;TR21412_c3_g1;TR2309_c0_g1;TR25083_c0_g1;TR25161_c0_g1;TR25452_c0_g1;TR25525_c0_g1;TR25525_c1_g1;TR25850_c0_g1;TR26889_c0_g1;TR2772_c0_g1;TR28299_c1_g1;TR28989_c…	K03364+K03364+K03352+K08049+K08049+K06627+K02649+K02649+K08694+K04441+K04440+K04456+K04456+K03350+K08049+K08049+K04368+K04373+K00922+K02537+K06638+K06631+K03348+K03348+K00922+K04079+K12456+K04371+K05866+K03364+K13296+K02602+K03354+K04630+K07827+K13728+K08041+K08045+K08049+K06633+K04373+K04345+K02206+K03350+K05866+K02178+K02087+K02087+K02649+K00922+K05868+K06645+K08041+K05868+K08042+K05866+K03353+…
Melanogenesis	ko04916	40	TR1015_c0_g1;TR1015_c0_g2;TR105_c0_g1;TR11841_c0_g1;TR13444_c0_g1;TR15663_c0_g1;TR16978_c0_g1;TR17522_c0_g1;TR19183_c0_g1;TR21109_c0_g1;TR23028_c0_g1;TR24538_c0_g1;TR26503_c0_g1;TR27223_c0_g1;TR2759_c0_g1;TR2826_c0_g1;TR29317_c0_g1;TR34073_c0_g1;TR35176_c0_g1;TR3786_c0_g1;TR383_c0_g1;TR42726_c1_g1;TR4275_c0_g1;TR4275_c1_g1;TR43067_c0_g1;TR43067_c0_g2;TR43067_c0_g3;TR43551_c0_g1;TR43551_c1_g1;TR46…	K02183+K02183+K02183+K08049+K02183+K02183+K02183+K02235+K02183+K02183+K02183+K02183+K02183+K02183+K02183+K02183+K02353+K00182+K02183+K08045+K02375+K02183+K00444+K01384+K02842+K02842+K02842+K01064+K01064+K02183+K02183+K02183+K02183+K08042+K02183+K02183+K02183+K02183+K04498+K05858
Adipocytokine signaling pathway	ko04920	16	TR10668_c0_g1;TR10668_c5_g1;TR15058_c0_g1;TR15251_c0_g1;TR2534_c0_g1;TR26991_c0_g2;TR33678_c0_g1;TR36034_c0_g1;TR39398_c0_g1;TR48793_c0_g1;TR48793_c0_g2;TR513_c0_g1;TR52906_c0_g1;TR658_c0_g1;TR7439_c0_g1;TR9788_c0_g3;	K04467+K04467+K03173+K07296+K02580+K02580+K01897+K01897+K08524+K01897+K01897+K07298+K07359+K07293+K01897+K02580
Type II diabetes mellitus	ko04930	2	TR14827_c0_g1;TR50914_c0_g1;	K02649+K00922
Type I diabetes mellitus	ko04940	1	TR7940_c0_g1;	K07817
Maturity onset diabetes of the young	ko04950	1	TR53700_c0_g1;	K06054
Aldosterone-regulated sodium reabsorption	ko04960	4	TR14827_c0_g1;TR39083_c1_g1;TR4593_c0_g1;TR50914_c0_g1;	K02649+K06276+K06644+K00922
Vasopressin-regulated water reabsorption	ko04962	11	TR11841_c0_g1;TR17299_c0_g1;TR17855_c0_g1;TR24448_c0_g1;TR26632_c0_g1;TR33384_c0_g1;TR37526_c0_g1;TR54391_c1_g1;TR57475_c5_g1;TR58380_c1_g1;TR8140_c0_g1;	K08049+K09866+K09866+K09866+K10416+K09866+K10414+K10414+K10413+K10426+K09866
Proximal tubule bicarbonate reclamation	ko04964	3	TR31257_c0_g1;TR31257_c0_g2;TR4378_c0_g1;	K09864+K09864+K09864
Collecting duct acid secretion	ko04966	1	TR40648_c0_g1;	K02154
Salivary secretion	ko04970	29	TR1015_c0_g1;TR1015_c0_g2;TR11841_c0_g1;TR13444_c0_g1;TR14430_c0_g1;TR15663_c0_g1;TR16978_c0_g1;TR19183_c0_g1;TR21401_c3_g1;TR23028_c0_g1;TR24538_c0_g1;TR26248_c1_g1;TR26503_c0_g1;TR27223_c0_g1;TR2826_c0_g1;TR30250_c0_g1;TR32788_c0_g1;TR32788_c1_g1;TR35176_c0_g1;TR42726_c1_g1;TR45818_c0_g1;TR46686_c0_g1;TR46686_c0_g2;TR47952_c0_g1;TR47952_c0_g2;TR49130_c1_g1;TR51740_c4_g1;TR56770_c3_g1;TR6369_c0_…	K02183+K02183+K08049+K02183+K13911+K02183+K02183+K02183+K13912+K02183+K02183+K12318+K02183+K02183+K02183+K04142+K07376+K07376+K02183+K02183+K04958+K02183+K02183+K02183+K02183+K02183+K02183+K13911+K05858
Gastric acid secretion	ko04971	23	TR1015_c0_g1;TR1015_c0_g2;TR11841_c0_g1;TR13444_c0_g1;TR15663_c0_g1;TR16978_c0_g1;TR19183_c0_g1;TR23028_c0_g1;TR23561_c0_g1;TR24538_c0_g1;TR26503_c0_g1;TR27223_c0_g1;TR2826_c0_g1;TR35176_c0_g1;TR42726_c1_g1;TR45818_c0_g1;TR46686_c0_g1;TR46686_c0_g2;TR47952_c0_g1;TR47952_c0_g2;TR49130_c1_g1;TR51740_c4_g1;TR6369_c0_g1;	K02183+K02183+K08049+K02183+K02183+K02183+K02183+K02183+K04920+K02183+K02183+K02183+K02183+K02183+K02183+K04958+K02183+K02183+K02183+K02183+K02183+K02183+K05858
Pancreatic secretion	ko04972	15	TR11366_c0_g1;TR11571_c0_g1;TR11841_c0_g1;TR18399_c0_g1;TR27318_c0_g1;TR4233_c0_g1;TR44482_c2_g1;TR45148_c0_g1;TR45818_c0_g1;TR45872_c0_g1;TR50090_c0_g1;TR51871_c0_g1;TR52333_c0_g1;TR6369_c0_g1;TR6749_c1_g1;	K04194+K04392+K08049+K04194+K14077+K04194+K04194+K01047+K04958+K04194+K05030+K04588+K12298+K05858+K14077
Carbohydrate digestion and absorption	ko04973	7	TR10731_c0_g1;TR14827_c0_g1;TR29290_c2_g2;TR31875_c0_g1;TR35277_c0_g1;TR50914_c0_g1;TR52063_c1_g1;	K04626+K02649+K01229+K01176+K12047+K00922+K08171
Protein digestion and absorption	ko04974	9	TR14361_c0_g1;TR17245_c0_g2;TR21718_c0_g1;TR30252_c0_g1;TR3252_c0_g1;TR374_c0_g1;TR38241_c3_g1;TR51538_c0_g1;TR7156_c0_g1;	K08132+K06238+K08132+K08131+K06236+K06238+K13868+K06238+K08132
Fat digestion and absorption	ko04975	9	TR16514_c1_g1;TR17557_c0_g1;TR23855_c0_g6;TR31497_c0_g1;TR39287_c0_g1;TR45148_c0_g1;TR48070_c0_g1;TR48070_c0_g2;TR52333_c0_g1;	K05641+K11155+K08760+K05641+K14455+K01047+K14462+K14462+K12298
Bile secretion	ko04976	23	TR11841_c0_g1;TR15784_c1_g1;TR17299_c0_g1;TR17855_c0_g1;TR18202_c0_g1;TR23267_c1_g2;TR24448_c0_g1;TR25398_c0_g1;TR27930_c0_g1;TR31257_c0_g1;TR31257_c0_g2;TR33384_c0_g1;TR38581_c0_g1;TR39398_c0_g1;TR42555_c0_g1;TR4378_c0_g1;TR44081_c0_g1;TR44822_c0_g1;TR46873_c0_g1;TR46873_c0_g2;TR51871_c0_g1;TR56030_c0_g1;TR8140_c0_g1;	K08049+K05658+K09866+K09866+K05681+K00659+K09866+K05664+K05658+K09864+K09864+K09866+K05673+K08524+K00489+K09864+K05667+K05658+K11822+K11822+K04588+K08204+K09866
Vitamin digestion and absorption	ko04977	15	TR20559_c0_g1;TR20559_c0_g2;TR21389_c0_g2;TR23759_c6_g1;TR23855_c0_g6;TR2526_c0_g2;TR29483_c0_g1;TR29663_c0_g1;TR40056_c0_g1;TR40725_c0_g1;TR47791_c0_g1;TR47791_c0_g2;TR48070_c0_g1;TR48070_c0_g2;TR8751_c1_g1;	K14386+K14386+K14386+K14616+K08760+K01435+K14616+K14615+K14621+K14615+K05665+K05665+K14462+K14462+K14616
Mineral absorption	ko04978	5	TR13723_c0_g1;TR24226_c0_g1;TR35837_c0_g1;TR48593_c0_g1;TR53637_c0_g1;	K12347+K14704+K12347+K14735+K14710
Alzheimer's disease	ko05010	40	TR10144_c0_g1;TR1015_c0_g1;TR1015_c0_g2;TR13444_c0_g1;TR13838_c0_g1;TR15446_c2_g1;TR15663_c0_g1;TR16978_c0_g1;TR19183_c0_g1;TR23028_c0_g1;TR24538_c0_g1;TR26503_c0_g1;TR27223_c0_g1;TR27422_c0_g1;TR2826_c0_g1;TR29474_c0_g1;TR30130_c0_g1;TR30536_c0_g1;TR32041_c0_g1;TR32041_c0_g2;TR35176_c0_g1;TR35314_c1_g1;TR35364_c0_g1;TR37404_c0_g1;TR42726_c1_g1;TR43698_c0_g1;TR45818_c0_g1;TR46686_c0_g1;TR46686_c0…	K02090+K02183+K02183+K02183+K00418+K04550+K02183+K02183+K02183+K02183+K02183+K02183+K02183+K03938+K02183+K03937+K04397+K04397+K08738+K08738+K02183+K04550+K03941+K02373+K02183+K03958+K04958+K02183+K02183+K01408+K01408+K01408+K01408+K02183+K02183+K02183+K04397+K02183+K02256+K05858
Parkinson's disease	ko05012	8	TR13838_c0_g1;TR27422_c0_g1;TR29474_c0_g1;TR32041_c0_g1;TR32041_c0_g2;TR35364_c0_g1;TR43698_c0_g1;TR58575_c0_g1;	K00418+K03938+K03937+K08738+K08738+K03941+K03958+K02256
Amyotrophic lateral sclerosis (ALS)	ko05014	15	TR10675_c0_g1;TR11571_c0_g1;TR1933_c0_g1;TR23923_c0_g1;TR26610_c0_g1;TR26868_c2_g1;TR30089_c1_g1;TR32041_c0_g1;TR32041_c0_g2;TR32696_c0_g1;TR5097_c0_g2;TR52323_c0_g1;TR5309_c0_g1;TR6362_c0_g1;TR6552_c1_g1;	K04575+K04392+K05198+K04574+K04574+K04574+K03781+K08738+K08738+K04574+K05613+K04565+K05613+K04574+K04574
Huntington's disease	ko05016	24	TR11653_c0_g1;TR13838_c0_g1;TR25874_c1_g1;TR27422_c0_g1;TR29474_c0_g1;TR32041_c0_g1;TR32041_c0_g2;TR33606_c0_g1;TR35364_c0_g1;TR35979_c0_g1;TR36184_c0_g1;TR43698_c0_g1;TR43961_c0_g2;TR45818_c0_g1;TR47884_c0_g1;TR52323_c0_g1;TR54202_c0_g1;TR57310_c0_g1;TR58297_c0_g3;TR58380_c1_g1;TR58390_c0_g1;TR58575_c0_g1;TR6369_c0_g1;TR9089_c0_g1;	K03120+K00418+K11644+K03938+K03937+K08738+K08738+K10408+K03941+K03010+K03008+K03958+K09222+K04958+K04533+K04565+K10411+K04498+K11143+K10426+K04564+K02256+K05858+K03006
Prion diseases	ko05020	13	TR10670_c0_g1;TR13658_c0_g1;TR16759_c0_g1;TR16759_c0_g2;TR16823_c0_g2;TR26668_c0_g1;TR49206_c0_g2;TR52323_c0_g1;TR57665_c0_g1;TR7541_c0_g1;TR7541_c0_g2;TR8833_c0_g1;TR9583_c0_g1;	K06491+K03988+K03994+K03994+K03994+K03994+K03988+K04565+K03987+K03994+K03994+K02599+K09553
Bacterial invasion of epithelial cells	ko05100	10	TR10170_c0_g1;TR11571_c0_g1;TR14827_c0_g1;TR20040_c0_g1;TR26209_c1_g2;TR33210_c0_g1;TR33210_c0_g2;TR36170_c0_g1;TR48656_c0_g1;TR50914_c0_g1;	K05747+K04392+K02649+K05719+K06278+K05747+K05747+K05760+K05725+K00922
Vibrio cholerae infection	ko05110	1	TR2025_c0_g1;	K10955
Leishmaniasis	ko05140	15	TR14734_c1_g1;TR17592_c0_g1;TR20040_c0_g1;TR20764_c0_g1;TR24016_c0_g1;TR2534_c0_g1;TR28952_c1_g1;TR30109_c0_g1;TR44713_c0_g1;TR44781_c0_g1;TR47607_c0_g2;TR48105_c0_g2;TR48105_c0_g3;TR5368_c0_g1;TR8899_c0_g1;	K04729+K04729+K05719+K10160+K04404+K02580+K10160+K06483+K06483+K04733+K06483+K06483+K06483+K04729+K11987
Chagas disease (American trypanosomiasis)	ko05142	17	TR10668_c0_g1;TR13658_c0_g1;TR14734_c1_g1;TR14827_c0_g1;TR17592_c0_g1;TR20764_c0_g1;TR2534_c0_g1;TR28952_c1_g1;TR37404_c0_g1;TR44781_c0_g1;TR46192_c0_g1;TR48726_c2_g3;TR49206_c0_g2;TR50914_c0_g1;TR5368_c0_g1;TR57665_c0_g1;TR6369_c0_g1;	K04467+K03988+K04729+K02649+K04729+K10160+K02580+K10160+K02373+K04733+K03456+K04500+K03988+K00922+K04729+K03987+K05858
African trypanosomiasis	ko05143	4	TR14734_c1_g1;TR17592_c0_g1;TR5368_c0_g1;TR6369_c0_g1;	K04729+K04729+K04729+K05858
Malaria	ko05144	11	TR14734_c1_g1;TR15446_c2_g1;TR17592_c0_g1;TR20764_c0_g1;TR23217_c0_g1;TR25807_c0_g2;TR28952_c1_g1;TR34421_c0_g1;TR35314_c1_g1;TR3946_c0_g1;TR5368_c0_g1;	K04729+K04550+K04729+K10160+K04659+K04659+K10160+K05718+K04550+K04659+K04729
Toxoplasmosis	ko05145	31	TR10668_c0_g1;TR14734_c1_g1;TR14827_c0_g1;TR16740_c0_g2;TR17592_c0_g1;TR18929_c1_g1;TR20040_c0_g1;TR20764_c0_g1;TR22041_c0_g1;TR24016_c0_g1;TR2534_c0_g1;TR27054_c0_g1;TR28952_c1_g1;TR29083_c0_g1;TR29338_c4_g1;TR29535_c1_g2;TR32041_c0_g1;TR32041_c0_g2;TR33500_c0_g1;TR40280_c0_g1;TR42328_c0_g2;TR44781_c0_g1;TR45148_c0_g1;TR46075_c0_g1;TR46926_c0_g1;TR48674_c3_g1;TR50914_c0_g1;TR52140_c0_g1;TR5368_c…	K04467+K04729+K02649+K04725+K04729+K04725+K05719+K10160+K05637+K04404+K02580+K04725+K10160+K04725+K04725+K04725+K08738+K08738+K04725+K04725+K04725+K04733+K01047+K04725+K06485+K05636+K00922+K04725+K04729+K05637+K04725
Amoebiasis	ko05146	17	TR14827_c0_g1;TR2025_c0_g1;TR20764_c0_g1;TR22041_c0_g1;TR2534_c0_g1;TR26466_c0_g1;TR28952_c1_g1;TR3252_c0_g1;TR37801_c0_g1;TR48656_c0_g1;TR48674_c3_g1;TR48720_c15_g1;TR50914_c0_g1;TR58572_c0_g1;TR6369_c0_g1;TR9916_c0_g1;TR9916_c0_g2;	K02649+K10955+K10160+K05637+K02580+K10955+K10160+K06236+K13963+K05725+K05636+K10955+K00922+K05637+K05858+K01476+K01476
Staphylococcus aureus infection	ko05150	19	TR10241_c0_g1;TR10839_c0_g1;TR11680_c0_g1;TR13658_c0_g1;TR16759_c0_g1;TR16759_c0_g2;TR16823_c0_g2;TR20048_c0_g1;TR20048_c0_g2;TR26668_c0_g1;TR31795_c0_g1;TR34421_c0_g1;TR36040_c4_g1;TR36957_c0_g1;TR49032_c0_g1;TR49206_c0_g2;TR57665_c0_g1;TR7541_c0_g1;TR7541_c0_g2;	K04004+K04004+K03991+K03988+K03994+K03994+K03994+K01315+K01315+K03994+K01335+K05718+K04004+K01315+K04004+K03988+K03987+K03994+K03994
Hepatitis C	ko05160	23	TR10408_c0_g1;TR10408_c0_g2;TR10668_c0_g1;TR14827_c0_g1;TR24566_c0_g1;TR24566_c0_g4;TR24566_c1_g1;TR2527_c0_g1;TR2534_c0_g1;TR28796_c0_g1;TR34420_c0_g1;TR35971_c0_g1;TR39398_c0_g1;TR42014_c0_g1;TR42014_c0_g2;TR46192_c0_g1;TR4709_c0_g1;TR49939_c0_g1;TR50914_c0_g1;TR8996_c2_g1;TR929_c1_g1;TR929_c1_g2;TR9932_c1_g1;	K12646+K12646+K04467+K02649+K08860+K08860+K08860+K06087+K02580+K02861+K14216+K12646+K08524+K05401+K05401+K03456+K06087+K12646+K00922+K12646+K05401+K05401+K02861
Pathways in cancer	ko05200	49	TR10668_c0_g1;TR11571_c0_g1;TR14827_c0_g1;TR16205_c0_g1;TR16205_c1_g1;TR16740_c0_g2;TR17522_c0_g1;TR18929_c1_g1;TR20040_c0_g1;TR22041_c0_g1;TR23058_c0_g1;TR25199_c0_g2;TR2534_c0_g1;TR26889_c0_g1;TR27054_c0_g1;TR29083_c0_g1;TR29338_c4_g1;TR29535_c1_g2;TR32041_c0_g1;TR32041_c0_g2;TR32753_c1_g4;TR33209_c0_g1;TR33500_c0_g1;TR37404_c0_g1;TR3850_c0_g1;TR39398_c0_g1;TR40280_c0_g1;TR42328_c0_g2;TR4275_c0…	K04467+K04392+K02649+K02157+K02157+K04725+K02235+K04725+K05719+K05637+K06229+K04482+K02580+K04079+K04725+K04725+K04725+K04725+K08738+K08738+K08731+K09289+K04725+K02373+K02085+K08524+K04725+K04725+K00444+K01064+K08775+K02091+K04725+K09288+K06485+K05725+K05636+K04500+K00922+K06229+K04725+K06618+K04462+K04498+K05637+K04362+K11987+K08736+K04725
Colorectal cancer	ko05210	11	TR11571_c0_g1;TR14827_c0_g1;TR16205_c0_g1;TR16205_c1_g1;TR32041_c0_g1;TR32041_c0_g2;TR32753_c1_g4;TR3850_c0_g1;TR48726_c2_g3;TR50914_c0_g1;TR9707_c0_g1;	K04392+K02649+K02157+K02157+K08738+K08738+K08731+K02085+K04500+K00922+K08736
Renal cell carcinoma	ko05211	6	TR11571_c0_g1;TR14827_c0_g1;TR37689_c0_g1;TR50914_c0_g1;TR57310_c0_g1;TR658_c0_g1;	K04392+K02649+K09594+K00922+K04498+K07293
Pancreatic cancer	ko05212	10	TR10668_c0_g1;TR11571_c0_g1;TR14827_c0_g1;TR25199_c0_g2;TR2534_c0_g1;TR4476_c1_g1;TR45995_c1_g1;TR48726_c2_g3;TR50914_c0_g1;TR54597_c2_g1;	K04467+K04392+K02649+K04482+K02580+K08775+K02091+K04500+K00922+K06618
Endometrial cancer	ko05213	6	TR14827_c0_g1;TR16205_c0_g1;TR16205_c1_g1;TR3850_c0_g1;TR39083_c1_g1;TR50914_c0_g1;	K02649+K02157+K02157+K02085+K06276+K00922
Glioma	ko05214	23	TR1015_c0_g1;TR1015_c0_g2;TR13444_c0_g1;TR14827_c0_g1;TR15663_c0_g1;TR16978_c0_g1;TR19183_c0_g1;TR23028_c0_g1;TR24538_c0_g1;TR26503_c0_g1;TR27223_c0_g1;TR2826_c0_g1;TR35176_c0_g1;TR42726_c1_g1;TR45995_c1_g1;TR46686_c0_g1;TR46686_c0_g2;TR47952_c0_g1;TR47952_c0_g2;TR49130_c1_g1;TR50914_c0_g1;TR51740_c4_g1;TR54597_c2_g1;	K02183+K02183+K02183+K02649+K02183+K02183+K02183+K02183+K02183+K02183+K02183+K02183+K02183+K02183+K02091+K02183+K02183+K02183+K02183+K02183+K00922+K02183+K06618
Prostate cancer	ko05215	9	TR10668_c0_g1;TR14827_c0_g1;TR2534_c0_g1;TR26889_c0_g1;TR39083_c1_g1;TR50914_c0_g1;TR54597_c2_g1;TR57310_c0_g1;TR6576_c0_g1;	K04467+K02649+K02580+K04079+K06276+K00922+K06618+K04498+K04362
Thyroid cancer	ko05216	3	TR33209_c0_g1;TR39398_c0_g1;TR46145_c2_g1;	K09289+K08524+K09288
Basal cell carcinoma	ko05217	8	TR16205_c0_g1;TR16205_c1_g1;TR17522_c0_g1;TR23058_c0_g1;TR3850_c0_g1;TR4275_c0_g1;TR43551_c1_g1;TR51740_c1_g1;	K02157+K02157+K02235+K06229+K02085+K00444+K01064+K06229
Melanoma	ko05218	5	TR14827_c0_g1;TR45995_c1_g1;TR50914_c0_g1;TR54597_c2_g1;TR6576_c0_g1;	K02649+K02091+K00922+K06618+K04362
Bladder cancer	ko05219	1	TR54597_c2_g1;	K06618
Chronic myeloid leukemia	ko05220	8	TR10668_c0_g1;TR14827_c0_g1;TR2534_c0_g1;TR45995_c1_g1;TR50914_c0_g1;TR54597_c2_g1;TR55129_c0_g1;TR658_c0_g1;	K04467+K02649+K02580+K02091+K00922+K06618+K04462+K07293
Acute myeloid leukemia	ko05221	5	TR10668_c0_g1;TR13870_c0_g1;TR14827_c0_g1;TR2534_c0_g1;TR50914_c0_g1;	K04467+K07205+K02649+K02580+K00922
Small cell lung cancer	ko05222	28	TR10668_c0_g1;TR14827_c0_g1;TR16740_c0_g2;TR18929_c1_g1;TR20040_c0_g1;TR22041_c0_g1;TR2534_c0_g1;TR27054_c0_g1;TR29083_c0_g1;TR29338_c4_g1;TR29535_c1_g2;TR32041_c0_g1;TR32041_c0_g2;TR33500_c0_g1;TR39398_c0_g1;TR40280_c0_g1;TR42328_c0_g2;TR45995_c1_g1;TR46075_c0_g1;TR46926_c0_g1;TR48656_c0_g1;TR48674_c3_g1;TR50914_c0_g1;TR52140_c0_g1;TR54597_c2_g1;TR58572_c0_g1;TR8899_c0_g1;TR9976_c0_g1;	K04467+K02649+K04725+K04725+K05719+K05637+K02580+K04725+K04725+K04725+K04725+K08738+K08738+K04725+K08524+K04725+K04725+K02091+K04725+K06485+K05725+K05636+K00922+K04725+K06618+K05637+K11987+K04725
Non-small cell lung cancer	ko05223	6	TR14827_c0_g1;TR39083_c1_g1;TR39398_c0_g1;TR45995_c1_g1;TR50914_c0_g1;TR54597_c2_g1;	K02649+K06276+K08524+K02091+K00922+K06618
Autoimmune thyroid disease	ko05320	1	TR4096_c0_g1;	K08522
Systemic lupus erythematosus	ko05322	14	TR13658_c0_g1;TR16466_c0_g1;TR16759_c0_g1;TR16759_c0_g2;TR16823_c0_g2;TR19308_c0_g1;TR19308_c0_g2;TR19308_c0_g3;TR26668_c0_g1;TR35305_c4_g1;TR49206_c0_g2;TR57665_c0_g1;TR7541_c0_g1;TR7541_c0_g2;	K03988+K11090+K03994+K03994+K03994+K11089+K11089+K11089+K03994+K11089+K03988+K03987+K03994+K03994
Rheumatoid arthritis	ko05323	6	TR20764_c0_g1;TR2419_c0_g1;TR28952_c1_g1;TR34421_c0_g1;TR40648_c0_g1;TR9397_c0_g1;	K10160+K01371+K10160+K05718+K02154+K05475
Primary immunodeficiency	ko05340	2	TR15828_c0_g1;TR46998_c0_g1;	K01488+K06478
Hypertrophic cardiomyopathy (HCM)	ko05410	13	TR12941_c0_g1;TR20040_c0_g1;TR22041_c0_g1;TR30109_c0_g1;TR32001_c2_g2;TR33815_c0_g1;TR38119_c0_g1;TR44713_c0_g1;TR46926_c0_g1;TR47607_c0_g2;TR48105_c0_g2;TR48105_c0_g3;TR58641_c0_g1;	K06584+K05719+K05637+K06483+K12567+K06265+K12567+K06483+K06485+K06483+K06483+K06483+K04870
Arrhythmogenic right ventricular cardiomyopathy (ARVC)	ko05412	11	TR12941_c0_g1;TR20040_c0_g1;TR22041_c0_g1;TR30109_c0_g1;TR33815_c0_g1;TR44713_c0_g1;TR46926_c0_g1;TR47607_c0_g2;TR48105_c0_g2;TR48105_c0_g3;TR58641_c0_g1;	K06584+K05719+K05637+K06483+K06265+K06483+K06485+K06483+K06483+K06483+K04870
Dilated cardiomyopathy	ko05414	14	TR11841_c0_g1;TR12941_c0_g1;TR20040_c0_g1;TR22041_c0_g1;TR30109_c0_g1;TR32001_c2_g2;TR33815_c0_g1;TR38119_c0_g1;TR44713_c0_g1;TR46926_c0_g1;TR47607_c0_g2;TR48105_c0_g2;TR48105_c0_g3;TR58641_c0_g1;	K08049+K06584+K05719+K05637+K06483+K12567+K06265+K12567+K06483+K06485+K06483+K06483+K06483+K04870
Viral myocarditis	ko05416	11	TR11571_c0_g1;TR22041_c0_g1;TR25918_c0_g1;TR26209_c1_g2;TR32041_c0_g1;TR32041_c0_g2;TR33815_c0_g1;TR34421_c0_g1;TR50133_c2_g1;TR58736_c0_g1;TR58736_c0_g4;	K04392+K05637+K10352+K06278+K08738+K08738+K06265+K05718+K10352+K03260+K03260
