# Supplementary material for: Transcriptome-wide identification and characterization of the Sox gene family and microsatellites for Corbicula fluminea
Source: PeerJ. 2019 Oct 22;7:e7770. doi: 10.7717/peerj.7770 (PMC6814067; doi:10.7717/peerj.7770)
Supplement: Table S5 — a: Mononucleotide repeat SSRs were excluded; p2-p5 stand for di- to penta-nucleotide motifs respectively; c stand for compound types. *: Indicating SSR sequences that Primers couldn’t be designed. N/A: No annotations in any of the 9 databases. –: No annotations in a given database. [file peerj-07-7770-s005.xlsx]

## Sheet: Sheet1
Gene_ID	Length	SSR_type	SSR	Start	End	Sequence	nr_annotation	nt_annotation	TrEMBL_annotation
TR32787_c0_g1	2747	p3	(AAC)7	2640	2660	aggctgaagactaaaataaccctgctatcagtttagtatattgcaaaccagctgattatgtatggtttacacagtattatctcatacaaatgagtgttcttgacccatataaaattttcccagtgtacatgtaattttccacatgcttccagtaggaatcagatagagtattttgttgtctgcttctagtagcattgttgtatggatgcattcatgtgaatcaaggttatttccccttcataaagcagttcgttttttccacttccatatcagtttttaaagcagcttgatcatcttaaaAACAACAACAACAACAACAACaaaaacaacttctccaaacaaataatctaccattcaactgattcctataattctcttgtattttggagaaaacctggt…	PREDICTED: 4-aminobutyrate aminotransferase, mitochondrial [Poecilia reticulata]	Cyprinus carpio genome assembly common carp genome ,scaffold 000001880	Uncharacterized protein {ECO:0000313|Ensembl:ENSXMAP00000002577} OS=Xiphophorus maculatus (Southern platyfish) PE=3 SV=1
TR25507_c50_g26	1521	p3	(TGA)5	629	643	tgcaatggattaaatcagtattatatagcaaatttacatcaacaatttacgacagactaaatagaaattccaataaactccaaaattgtacaactgacatcatacagatttacagtagattgtacaaatacacatcactactctgtaacacccagatttgttacctctttaatcaatcatcaagtttataattgttagtgttttgtaatttttgttcaatttttaagaaattgcttttgttaccatggttacccattctccagaactcttcaaaaagtttctgtcagtataatgattgatTGATGATGATGATGAcgatgatgcaataatcaaagtaacaaatatcactcaatacactgacaaaaactttgtgaacacagcatgcctttttacacacct…	PREDICTED: ADP-ribosylation factor 1-like [Cynoglossus semilaevis]	PREDICTED: Poecilia reticulata ADP-ribosylation factor 1-like (LOC103468656), mRNA	Uncharacterized protein {ECO:0000313|Ensembl:ENSXMAP00000009214} OS=Xiphophorus maculatus (Southern platyfish) PE=3 SV=1
TR47868_c1_g2	1858	p3	(CTG)6	582	599	gtcaaactcgagcatggcatccagttcatcggtgaggccctggagcatattgtctatctcactaagcacatccccagatttctgcttggaggccactgctgcttcccctttaggctgtggttttggtgacagtgcaggctttaatgcaggcttctgggcaacactgggcttactgggagtttgtgtgacaggaacataggatgctgttacactagcattgtactggggtggaactttcatctgctgggcattctgggacatttgttgttgttgtgcagcaagccgctcatgctccaccctCTGCTGCTGCTGCTGCTGttgttgctgttgctgcgattggctattattttgttgctgaggttttggcattaattttggctgttgtaatttttgaacagt…	PREDICTED: alpha-protein kinase 1-like [Notothenia coriiceps]	PREDICTED: Cynoglossus semilaevis myocyte-specific enhancer factor 2D homolog (LOC103394559), transcript variant X4, mRNA	Chromosome 8 SCAF14543, whole genome shotgun sequence {ECO:0000313|EMBL:CAF97895.1} OS=Tetraodon nigroviridis (Spotted green pufferfish) PE=4 SV=1
TR20708_c0_g1	1439	p3	(AAC)5	25	39	aacagggatatgtcaccccaacaaAACAACAACAACAACagcaacaacaacaacagagtttccaagaaaattcagcacagagacaagttcatttgcatcacctgatatcaccagctcagaaacaagtgatggcctcatctcttccagcagcaggtgtaccgaacaggactcatgttgttattgaagataagcagcttaaatcatcaacagacacttcactgccccagcatcagaatatcagttcaccgaaatcgactgtatctcatttacaacatctccagaatatgtcaaatatggtgtccaaacctgtgcacaacacaacaccacaagtttcacaag	spalt-like transcription factor 1 [Xenopus laevis]	Scatophagus argus clone SA126 microsatellite sequence	MGC68418 protein {ECO:0000313|EMBL:AAH59284.1} OS=Xenopus laevis (African clawed frog) PE=2 SV=1
TR10568_c0_g1	2568	p3	(GTT)6	2429	2446	ctgtctatcacttttaatttaacattcttccttcgcagttcgttgttgccctgcaggaactgttcgttacactgtatcagatactcttcatacttctcctcctctgctacctcgcactggtagaagccaagtttgatttgtgtaagttcttcttccgtttctttaacctttaatctcatatactcaatgccttcgagatacgccctctgtagtccggctctgacctcggcaggcaagatgacaggctgctttgcaaggtcatctccgctcgttgtgacagatattcgtgtaattattgagGTTGTTGTTGTTGTTGTTtcttcacctatactctcatcgacccgtgttacaaacacttccccgttaccattctcagcggcagtgttggaagtcccctcc…	PREDICTED: nuclear mitotic apparatus protein 1 [Zonotrichia albicollis]	--	Uncharacterized protein {ECO:0000313|Ensembl:ENSLOCP00000016716} OS=Lepisosteus oculatus (Spotted gar) PE=4 SV=1
TR51786_c3_g14	1627	p3	(AAC)5	1205	1219	ggtcaactgaagccgcttcatttattcttgaagaactttttttcaataaggctgctttgttattttggacaatcgttgaataagtaactgtctaatttactatccatgatttaaatttagcaatcatgtataaattaataggaaattgataatattgatatttgagggatgtaatgtttgttagtttacacttttccaagctgctttttgtgtggcttttggcgatttggtgatagtgaatatggacagacattagaagttaaatatataagcggagtatcacctacgtataatttagaaAACAACAACAACAACagtgcccgctggtaattaaaaatcagttaaacgctaatcacacctttaatagagtgaagaaaaacctttcataacagcaagcta…	#N/A	#N/A	#N/A
TR14705_c0_g1	1061	p3	(TTG)5	115	129	ctaacattgtcaaagcctttattgtaaataaagtttacaatcttatacatcatccacatttaaaagtaaagcatcaacaaaacttggcatgctcatctatttattgtcaccataTTGTTGTTGTTGTTGttttatccacagacataaaatgatcattgatataataaccattctaaccagaaactagaactgtgttcattaataatttttcattctgtagttgttaaattaatgtcggccgcaacaaaaagtctttctttccatagagttcctcttgaaactgcttgtggaagagccagcacatctctgcccctttctcaatcacgtctgacctctgtatcaggttggccggaagtctgcgatgactaggcattttcatgtcgccgtcaacttcattat…	PREDICTED: inter-alpha-trypsin inhibitor heavy chain H3 isoform X2 [Nestor notabilis]	--	Inter-alpha-trypsin inhibitor heavy chain H3 {ECO:0000313|EMBL:KFW65616.1} (Fragment) OS=Pygoscelis adeliae (Adelie penguin) PE=4 SV=1
TR21352_c0_g1	3002	p2	(TC)6	2188	2199	tatcaaaacgaaatcattatgtaacaaaaacactcttctttttcctcggatctttatctgaaatcgcatattctgtgttatcataagctgggaaacatctgcggtattcactctcccaacttgcagtatctcgagcaattttctcattaaactttgccttcctgcgcttttctcgtgcagaggctgtgcgctgtttttccagttgtttttctatcagcagttggtttcttttctttgctctcaacgcagctggatacacagccgatgaagctctcacattgaacgttttcttatcaccagTCTCTCTCTCTCtgtcaccacacccgtagttgtagaatggctgtgatgtggcaacctggtggctcgctggtctgctagccggggcagactgaggacgtg…	PREDICTED: centriole, cilia and spindle-associated protein-like [Oreochromis niloticus]	--	Uncharacterized protein {ECO:0000313|Ensembl:ENSONIP00000021525} (Fragment) OS=Oreochromis niloticus (Nile tilapia) PE=4 SV=1
TR41554_c4_g1	1225	c	(T)10(G)14aatctgtacaatatttcctgcaaaaactttttcattacaaatccgaagattatgtctcgatatgtcaatgaggacaaggataatgatga(TGT)5	85	212	gaaaaaaacagtgccatttcatagcacattctaaaaatactgcccataaatttactctgatgatttaagtctttatttaatgtcTTTTTTTTTTGGGGGGGGGGGGGGaatctgtacaatatttcctgcaaaaactttttcattacaaatccgaagattatgtctcgatatgtcaatgaggacaaggataatgatgaTGTTGTTGTTGTTGTttgctgttgttattttaatgtctttgttgttgtttttaaatatgaatgtgactaaataaaactgatgatgataaaaatatgatgattataatgatatttttttcatattcttcttataattatattctttaaggaattttgaatgtatattgccgattttgatagaaatggttaaagaacttgttta…	#N/A	#N/A	#N/A
TR10367_c0_g1	5228	p2	(TA)6	1354	1365	gaaagcgaaatatatacactaaaatatacacttgtataattttcatatacaaacaagactctaaataaaatatgagaaataagtaatctttttaatgtgtataaaagtaattacatgtaaaagtgcttatgtacaactggatatgacatgaaatggaatggtcaaaaacaaatataaaagtcattgattacctctttcaggaaagtataaattaattccaaaagggaagaattcccattttggtaaatatatattttttataattttagaaatattataataacttatttgaactttatgTATATATATATAttcaatcttaaaattgtgttaaattctgcatttcatttgtaggttcaagaaaaaagtatgtatttaaaataaaatcactggctccga…	PREDICTED: sodium/potassium-transporting ATPase subunit alpha-3-like [Astyanax mexicanus]	PREDICTED: Oryzias latipes sodium/potassium-transporting ATPase subunit alpha-1 (LOC101156309), mRNA	Uncharacterized protein {ECO:0000313|Ensembl:ENSAMXP00000018468} OS=Astyanax mexicanus (Blind cave fish) PE=3 SV=1
TR26690_c4_g2	4285	p3	(GAT)5	2745	2759	tattataattccgcgttactcattgacactatgaaaagtcttgagatggccaatgtgcaaggctctgtgatgcaacagttcttgaaacagtggattcatgatgtggattgtttcctaggtttacacgatagaaagatgagtgttttaggactgtgtaacctgctgagtatgatagagagtagacccgaggaggtgacagctgtcggaccggagatccttcctgcatcacttgtactgttcactggtcttaaaagggcgtatgaaactcgagcagagaacgagaactctgacagtgatgacGATGATGATGATGATgacgatggtgactacgatcacgaggcgttggctagtgatgaagatgaggtggatgaggaaggacaacagtacctagaaaaactg…	PREDICTED: importin-7 [Chrysemys picta bellii]	PREDICTED: Pseudopodoces humilis ATPase, Na+/K+ transporting, alpha 2 polypeptide (ATP1A2), mRNA	Importin-7 {ECO:0000313|EMBL:AFO93798.1} OS=Callorhynchus milii (Elephant fish) PE=2 SV=1
TR55860_c0_g1	1758	p3	(TGA)6	406	423	aggaccaggattttttggcaacttctgcttgctgcaagatggcttgtcagactgatcttgattaggatcatcgggtctgataggggtcggtcctttgtcattcctctgcatactatcacctcccctttgcacgttgtttgaatcaactctagagatatgagagttgtctcctcttgacataatatttccactaggtgggtgcatgactgtattattcctttgaatgacattgttattgctagcgttttgatcgtacatgtttggcattgatgatgggaggcttgtttgagatggcacattTGATGATGATGATGATGAtaaacttggtggtggtggaaaaaatggaaactgatgatgtcccaacccgcctgaacttgtcgtgatggttgatgacgagga…	PREDICTED: uncharacterized protein DDB_G0271670-like [Pseudopodoces humilis]	--	Uncharacterized protein {ECO:0000313|Ensembl:ENSDARP00000109218} (Fragment) OS=Danio rerio (Zebrafish) PE=4 SV=1
TR39435_c0_g1	2680	p2	(TA)6	2642	2653	ctttatgtgttatctatcacaagttttgaatagtttgccatcatgttctttttcatatttatgaatgacgtataaacaaccgacttgacatggaggatcatattgaagctagaacctaaaattgtaaccctcactgccagatatcctatttgatatgctaatcaccacataaaggaccaccaatataaaagtctgtgtttttaatataactattatttgatcaacactgtgaacaaaatacttgatagaaacatggacaagtaaatggttagattgttcctaaacattttaacccattacTATATATATATAtgggttttatcaaatttatcactgtag	PREDICTED: PDZ domain-containing protein 8 [Anolis carolinensis]	--	Uncharacterized protein {ECO:0000313|Ensembl:ENSACAP00000010117} OS=Anolis carolinensis (Green anole) PE=4 SV=1
TR10689_c1_g1	1400	p3	(TTG)6	1022	1039	tataagttgccaacatttctgtcactttgttcgtcatgtccagaatctcaccaaatctatttatttctaacaaaatctcatgagcagcggatcctcttacaataatgtcatttgaacgtgcactccctaattccataacagttgattccataggaaagatagaagaatcctcatcattcttaatgaccaccactcacccccataccttggctttctcaggctgcacaacttcaccacctccacagatttacgtctttttgatcccgaaatcatcttttccccggagaacattctaccataTTGTTGTTGTTGTTGTTGtctggtatattccccctccttttagaggcactcctgctagcaggatatttctcagtatgtcacaaaaatcaccagattcca…	PREDICTED: uncharacterized protein LOC102297550 [Haplochromis burtoni]	--	Uncharacterized protein {ECO:0000313|Ensembl:ENSPFOP00000026896} (Fragment) OS=Poecilia formosa (Amazon molly) PE=4 SV=1
TR31261_c0_g1	2773	c	(T)10g(T)11	2721	2742	aggaaactctttacttttactttggcaaattaatagtcatctttctaacatttcgacttgcatgtttgcagtctttactgattatgatccacaccatcgaagaagtccgtccacacatccgtccgatcaataactagacaacgatttgacatacagtcttccgattcggtagggagtagatgaccccgattttgtacttagtagttcaaaggtgaagtcacagcaaccttcaataaagtaacagcagcgtactacccaattggtgttttggtgcatacatgttttgaaaacatctcttggTTTTTTTTTTgTTTTTTTTTTTaagaaatcatttggtttttaggtatttgtaa	--	--	--
TR2255_c1_g1	1459	p3	(CAA)5	337	351	gagcaaaaagccaagtttgcggagtatcaggaaaaagctaacagggcattacaacagaggttaacagaaatcgctacaccgacagcattacagcggatggaactgcggcgacagtccagctctgatgatctaatagagtcaaacttcagcaccccacccaccccagagaaagaaagtagttcagggaagaataaaatctgggctaaacatgcaatagagaaaacacaacaccgcactgcactagatggcccagtacgaagtgattcacccaccttctcccatccatcaagctccagtcagCAACAACAACAACAAggaacacgtaaatctgacccaaacttttctgcttcaaaacgaaactctactccagtacatctctctccatctaagtcgtccaat…	PREDICTED: dentin sialophosphoprotein-like [Latimeria chalumnae]	--	Uncharacterized protein {ECO:0000313|Ensembl:ENSDARP00000109218} (Fragment) OS=Danio rerio (Zebrafish) PE=4 SV=1
TR45839_c0_g1	2805	p3	(ATG)5	1044	1058	tggatattgttggagctgcagaaacaggaagtggcaaaacattggcatttggtattccagttctacatttcattttgcaacaaaagcaacggcaattagagaagcttgaagaagaagatgaggaagcagacagtgaagcagtggatgataatgacagcagcagtgagactggagatgttcaacacgacgaacaggatgacaacaccgatgacgagaacgaaaattaccaagataaagatgataaagaggaagattctggttatattaatgaagaagaagatgatgataatgatgatgattATGATGATGATGATGacagcaacaatgagcccgatgttaatgacagtaatgaattggagacagcagatactggttcctgtgaagaagagtcatcggatg…	PREDICTED: ATP-dependent RNA helicase DDX24 isoform X1 [Stegastes partitus]	PREDICTED: Pelodiscus sinensis DEAD (Asp-Glu-Ala-Asp) box helicase 24 (DDX24), transcript variant X2, mRNA	ATP-dependent RNA helicase DDX24 {ECO:0000313|EMBL:AHH42749.1} OS=Ictalurus punctatus (Channel catfish) PE=2 SV=1
TR49712_c0_g1	1196	p2	(AT)6	490	501	taaaagaacaaaaactttggcataacactcatgtgcaaacaggaataatattaacaagcggaggaaaatgatttcaataaacaaaaaggattccatattttggttaacttattttggttagactaaaagaaaggaatcaacagcgttgaatgtttaccgtgtatatgccttcagatttttaaaggatgaatattttggttaaggcaaaatttaagtcaaaaacagccttaacttgaaaaatattggtagcagagttatcgatcttgttggtaatgatgtagattttggtggtgaatataaATATATATATATacatttttgttattattgtattccaagtttcaaagttatggacctagtgcatatgttggttaattgatgacaatgtcggggtgagta…	#N/A	#N/A	#N/A
TR39071_c0_g1	1180	p3	(ACA)5	441	455	caaagaaggaagaagagttcctaaagaaaaggctgtagagaatccccagtacacagagatcagagatgtatgtctcagtgcaggactcaccattggagtagagaataaaacatatgctagagaattggatcacaaggacctgaagtacaggggtagaattagagtacaaatcaagaatgaagatgggtctttaagatatgaaaagttcccgacaagacagtccattttattgtatctgggtgagacaattccaaagttgaaaggaagacagcacggtggaggctcctcgcaacaggcatcACAACAACAACAACAaggaggaaaatctcagaaaaagaaaggcaggaaaggtggcaaatgagagaaaagaggatttatatattttttgaaatttaagtt…	PREDICTED: signal recognition particle 19 kDa protein [Callorhinchus milii]	--	Signal recognition particle 19 kDa protein-like protein {ECO:0000313|EMBL:AFP06788.1} OS=Callorhynchus milii (Elephant fish) PE=2 SV=1
TR45583_c0_g1	1602	p3	(AAC)7	2	22	aAACAACAACAACAACAACAACacagaacagacaaaaatattttaagctttatatgtagaagaacacatttcaatagagtatgtttgggcagcttgtgattggtcctccaggatcaggcaagacaacttactgtgctggtatgttgcagttccttgctggatttggtcgacaggttgcagttgtcaatctagatccagctaatgatgtgttaccatacacaccagatgttgatatatctgaccttattacaatatcagatgtaatggacactttaaaactaggtcctaatggtggactggtctactgtatggaatatctaga	PREDICTED: GPN-loop GTPase 2 [Oryzias latipes]	--	Uncharacterized protein {ECO:0000313|Ensembl:ENSORLP00000005555} (Fragment) OS=Oryzias latipes (Medaka fish) PE=4 SV=1
TR23281_c0_g1	2837	p3	(ATC)6	282	299	tttgaaatgacatatattgaaggataattggaggggcgattttggtttgtatctctgataaatatcagaatttatttgtttccaaacgacaactaacagctttattggtgtttacataactatagagacactatttagaacaaataaatgaaaacgagttgaagaagtattgaattacaaaggttttaattggtaattgttgagtcttcaagaatcaaccacctttatccatgcatgatattaaatattaccccaatgtaaacatgatcactttattcattATCATCATCATCATCATCtgaacattctccatagacatccccaccaaaggtcatctctcccttgacacccatcagtttagatctagctacagcttgttcagcaatgtcagaggtgaag…	PREDICTED: vezatin, partial [Colius striatus]	--	Vezatin {ECO:0000313|EMBL:KFP34281.1} (Fragment) OS=Colius striatus (Speckled mousebird) PE=4 SV=1
TR51453_c0_g1	1685	p2	(CT)16	1653	1684	gatcacagcagccacattaccataattttcataaaaacaacattgccaggaaatagtattcctatattgccgtagttgctatttgctaaaaaattcgaatttcacacaggcaatcaatttaaataactattcacttttacgttcgcagtgaacaaattcgtatatgacaggacttgaaaaagagacattgttattgcataaaataaaaaaaaatgcaaacactgctaataccatagagttatatgaatactttgttttctctctttggctgttttgctttgtattgaatatattacaatgCTCTCTCTCTCTCTCTCTCTCTCTCTCTCTCTc	PREDICTED: beta-1,3-galactosyltransferase 1 [Xenopus (Silurana) tropicalis]	Zebrafish DNA sequence from clone DKEY-14A13 in linkage group 20, complete sequence	Uncharacterized protein {ECO:0000313|Ensembl:ENSXETP00000035373} OS=Xenopus tropicalis (Western clawed frog) PE=4 SV=1
TR28623_c0_g1	1626	c	(AG)6c(GA)16tacaaagagacagagggagagg(GA)8	1543	1625	aaaaattattgttacaatctttgaggttaaagaaagattaaaactaaatgcaaatacctttagaaatgtgtaataattggaaatgttaagcgaaaaacatatcagttaaatctgattgtttggttgtatcctgtcgaaaaatacatgttcagatatttcagttgccatcactgctcgccaagttaggccgagttaagttttgaattatgtcgatctttaatttctttcaattcatcttttatagtttttaaaatgtactttagtttgtttatatatttatatttatatattgcttgtgatAGAGAGAGAGAGcGAGAGAGAGAGAGAGAGAGAGAGAGAGAGAGAtacaaagagacagagggagaggGAGAGAGAGAGAGAGAg	novel protein similar to vertebrate galectins [Danio rerio]	Zebrafish DNA sequence from clone DKEY-261O7 in linkage group 17, complete sequence	Galectin {ECO:0000256|RuleBase:RU102079} OS=Callorhynchus milii (Elephant fish) PE=2 SV=1
TR35346_c0_g7	1395	p3	(TGT)6	250	267	gactggctcttgttatgataaattcttttcatgtacaggttctggcaccagacggttattttcattatttagaactaacttgtgattttagttgcagttttaacactgtgctatcatttaaaatttgtatcgttacaaacttcgctaccgggggcatatgtgttttccgaacacagcttcttgttttattatgtctttatgtcattactctataaaattaatctccaggttttcagagagcagaataaaTGTTGTTGTTGTTGTTGTtaggctgaatgaaaatttggggtagtatatggtaataagccacattgtctgtccatccaatattcaagttttccccgtatctttgatatgtgaagtcacaatttaaaatttatttgacagaaatgatcgtcc…	#N/A	#N/A	#N/A
TR57041_c0_g1	1005	p3	(AAC)5	550	564	cctacataacaataataacaaacaaacaagctaaccattctaatgcaattacaataaaaattagactaaagggtgcaagaaaaaacaacacaggtgcaataaattgttaatgtaacagcattagaaattatattaaaagtagtctacaaaatgtatgtgattgaaaatcacagaattaatggagatcataggttgtcattaacagcttaaagttactaactaaaaaaaactcaaagcagtgattttgcttactaagtactgtaaaatccctattaaacattcccaaccttttcctggaaaAACAACAACAACAACaaaaccgacaacaaacaggtgtgaacttaacaaaaaaaagcacttcaatagtacttaaaacattaaaatcacaaccccagacat…	PREDICTED: small proline-rich protein 3-like, partial [Lepisosteus oculatus]	--	Uncharacterized protein {ECO:0000313|Ensembl:ENSPMAP00000011385} (Fragment) OS=Petromyzon marinus (Sea lamprey) PE=4 SV=1
TR44660_c1_g2	2301	p3	(ATC)5	662	676	aatcaaatgtccactttcatgatctcctcatcttctcattggccctaagctcccatcatcttcccagtccgggggagcaaatcctctgcctacaggagtcccttgctttcttccatgcttgagcaaaccttccagaatacctccacgacctcgccccattggtagagcattaactactccattgaccattggtctcggttccgcagggctggactggtatcttgaatcaaggttccctcctggtctgctcacagggccaagtgttggtgcactctgtcctggtagtcgtaaaggtgtaatATCATCATCATCATCattatgggcagcagctgaatacggattggagggaggaggagcaccagcagatatcatgccacgacccacacccactggcggctg…	PREDICTED: protein maelstrom homolog isoform X3 [Anolis carolinensis]	--	Uncharacterized protein {ECO:0000313|Ensembl:ENSACAP00000022894} OS=Anolis carolinensis (Green anole) PE=4 SV=1
TR32220_c1_g1	1048	p3	(GAC)5	19	33	gacgacggcaccgacgaaGACGACGACGACGACgcagccggacaataggatccctatgtgtctacctgctatcgcaggcgacacaaaaacaagcgttggtctttctgaatgaataaaccagtgtttaattcaccaaccactaattttggctaacttgcagacagagtactgactcaaattgtatcctaacttctcaaaatcctaaaagctataacattaacagtaaacatcgacaatttcggcgagacccagtgcattttgttaagtagtgactatctgttttgtattttacaagactaccaagaaatttattgacctaaaatgacaggtgca	#N/A	#N/A	#N/A
TR55105_c1_g2	1930	c	(T)10aatattggactgagatcttgcaaattgaaataacatctaattgaaatg(A)23	1850	1930	tgcttgatctccagaaggcagctgatcgacgggttttaagtaaaaaaaaaatgattgcattcatagttgtcaagccaaatcaggcaattagagtaattattggtcttatattgaaaatctttcaagatttcacttgcgatcgacactagtctatggacatgatgtgaatgaaataagaacaaacataagtaaaatctgtaaagttattttgtacgccgatgacagttttatttgtaaacttctagaattgaaaaaatgtcttattaaaattgagcaatgattatcatgttaagaaaactaTTTTTTTTTTaatattggactgagatcttgcaaattgaaataacatctaattgaaatgAAAAAAAAAAAAAAAAAAAAAAA	Inverted formin-2, partial [Tauraco erythrolophus]	Xenopus (Silurana) tropicalis interferon-induced protein with tetratricopeptide repeats 5 (ifit5), mRNA >gi|197245769|gb|BC168560.1| Xenopus tropicalis cDNA clone MGC:184922 IMAGE:7678513, complete cds	Inverted formin-2 {ECO:0000313|EMBL:KFV18403.1} (Fragment) OS=Tauraco erythrolophus (Red-crested turaco) PE=4 SV=1
TR24429_c0_g1	1590	p3	(CCG)5	14	28	agactacatgacaCCGCCGCCGCCGCCGgacaataggatccaaactgtgtctacctgctatcgcaggtgacacaagaaaggtcaaaatctataatttcatataaacagtttatgcaagatgacttttgagcagaataaaccaaagaatcagtctccagatatctggcttttcggaacttcctgttgattcaaagtttggctcagctcaggaattgtttgacttttgccataagggaattatcttttattggtctaaagcacactttctggcacagtctatgttgatagattatactggtcttgaattgtttggtctctccagtctgtt	Caspase-3, partial [Aptenodytes forsteri]	--	Caspase-3 {ECO:0000313|EMBL:KFM01469.1} (Fragment) OS=Aptenodytes forsteri (Emperor penguin) PE=3 SV=1
TR39799_c0_g1	1603	p3	(TGT)5	1446	1460	ttttataagtatttgtatttatattgtacatttgtagattatatgcattattgtcataatattttataccgcctttcttatgtttataaagacactaaatgtacatttatatgtttttttgtaccaaagtctttttcacatcaaaatggcataacagactcattgccacatattgataatgttatgaagtcttatacaaaacatcaaggctttagcattaatttatcagtcttcaatgttactgatacccgattaacgaatcaagcatgttatatggaccaagacttagccaaacaccagTGTTGTTGTTGTTGTaacaactcggcctggaaacttaaatgctgctactttactaacagaattcactatagttttactgattgttggatttttgcacta…	PREDICTED: CCAAT/enhancer-binding protein gamma [Esox lucius]	--	Uncharacterized protein {ECO:0000313|Ensembl:ENSGACP00000023175} OS=Gasterosteus aculeatus (Three-spined stickleback) PE=4 SV=1
TR26837_c0_g1	2958	p3	(TTG)5	14	28	aaacaatccgccaTTGTTGTTGTTGTTGcacattttgccgaatcatgacaccggcgtgagtttgtatctcttctgttgattgtctatatcatagaacgtttatcctttctttagcaaaccgtatccctaagccttaaggatatattgaatattctcgataaacatgacggcaggaagtaccgacgttgaaatgaaagatatcaccagtcctgcaaaaagtgaaaaaatgaatggagttgccgaagaagaaccaacaaaagatcccgagcttttgaccctagaagatgtgagagattatgtcaaatatattgagaagtcggtgtcaaca	26S proteasome non-ATPase regulatory subunit 3-like protein [Callorhinchus milii]	PREDICTED: Latimeria chalumnae proteasome (prosome, macropain) 26S subunit, non-ATPase, 3 (PSMD3), mRNA	26S proteasome non-ATPase regulatory subunit 3-like protein {ECO:0000313|EMBL:AFM88771.1} OS=Callorhynchus milii (Elephant fish) PE=2 SV=1
TR37078_c0_g1	1681	p2	(TG)6	1629	1640	ataactctgtatgacagttccatctacgtcattagaattcaattgtagaatattattggtgaagaaagaacattttctacattgattccttaaagtattctctaggtcattttgcttatttgaaaaatgcttcatctactttaaccatttacctatctgcagaagttttattaacattaaaatgataataaatttgtaattaatcaacctattactacatggatacatgggctgtcagtgttgatccagatcagctgacacaaccatgctcaatgacttggatctacattgttcgtttttTGTGTGTGTGTGaatttatcagaaatacccaaataaatcaaaaggcaaacact	PREDICTED: erlin-1 isoform X1 [Anas platyrhynchos]	PREDICTED: Anolis carolinensis ER lipid raft associated 2 (erlin2), mRNA	Uncharacterized protein {ECO:0000313|Ensembl:ENSAPLP00000012348} OS=Anas platyrhynchos (Mallard) PE=4 SV=1
TR35281_c0_g1	7090	p3	(TCA)5	4465	4479	tggggacccatgttggtggccagggttacacatatactcaatgtagtggtcaccaggtttttgttgttatcattaagcctaactttgatggcctctggcagtagaccgagatttcccttgatgaacttggcctcgttgagaatggcgattatcttctgtagggcctctcctcgcaccttccagttcttgtccgacatggattctatcagctcttgggtgaagcgctcaccaatatcatttctgggaataagatcagcagcgccctcttcatcatcgtcacgtttttcttcctcctcctctTCATCATCATCATCAcctgcagcagacttgaggccacgaataggggctggcggcttctgacctttcaccttttcaaactctgcatctatctgctgcagt…	PREDICTED: cytoskeleton-associated protein 5 isoform X1 [Charadrius vociferus]	--	Cytoskeleton-associated protein 5 {ECO:0000313|EMBL:KGL88497.1} OS=Charadrius vociferus (Killdeer) PE=4 SV=1
TR8181_c0_g1	2608	p3	(CCA)5	1151	1165	tctataaactgctatatttgttcaaaattaaaattaaaaagtagttatttttttgtaaaacaactaaacttgtcctctagacacaaaattttcaaactgcaaaatctgttaaggtcatttgcctcatggattgaaatgggacaagatgagataaggctgattatgatgagatgtaagcaatcagagtagatcactgttgccatggtgatgaatccaataaaaaagcaaagctatcacagttaataagatcccacaattcagaacacagtttgtgatggctacatggctaacgtgtctgctCCACCACCACCACCAaactgatttgtgtcgtagtctcgctcctgattcaatttcttgaattctacaacttgtgtgaagatgtattcgaggatatgttta…	PREDICTED: intraflagellar transport protein 52 homolog isoform X2 [Python bivittatus]	--	Uncharacterized protein {ECO:0000313|Ensembl:ENSPMAP00000002310} OS=Petromyzon marinus (Sea lamprey) PE=4 SV=1
TR10529_c1_g1	2042	p2	(AG)12	71	94	attttccagagttaaaaaagtgaaatatacatatcaggaattgcaacattcagaagtcaaagccaagaaaAGAGAGAGAGAGAGAGAGAGAGAGaaaattatataatttataaatcggttctgtaaatttatacgttcataggaatgacttctttgcacttatatttaacaaatatctatatatttttaatttaaatgccacaaaattcgaacaagaacaacttaatgatgggcagtttgcactactttcaaattaactacgagctgactgttgatttggctcaacgttcttgtacagacaattatcatcgtcttccggttgaatttgttgatattcttcctctatttctccattcctttgaaaggcttcgtacgtgtttttcgtctcagaatt	PREDICTED: B-cell receptor CD22-like [Maylandia zebra]	PREDICTED: Poecilia formosa eukaryotic translation initiation factor 4 gamma 1-like (LOC103143052), transcript variant X5, mRNA	Uncharacterized protein {ECO:0000313|Ensembl:ENSONIP00000000377} (Fragment) OS=Oreochromis niloticus (Nile tilapia) PE=4 SV=1
TR38167_c0_g1	1320	p2	(TA)9	336	353	gaaaatacaataaagattgtcagactttattcaaagattaagtatacatgtaacatacaaaatgtaaagttaaaaaagcaatttcattctaaagctgaacgtatttaaaatgcaaagagtgtgatttcgtttcaccttgcaaatggattaaacccctgttttgcaactttactattttagggatatttgcaggtagcatatcagcattaattctcgccatgaataaatcttgattaacagtgtaattgggaggttaatcttgttatttgcatttgcccccgagcatggctgttttggcttTATATATATATATATATAtgcaaagtcaggtaaggtgtgttgtgcttatctcgcaaacacagacatacgtagcttataatactgtttctaagtgatgat…	#N/A	#N/A	#N/A
TR27763_c0_g1	1230	c	(AG)6acagacagagagagagacagagagagaaagtgtgtctgtaaataaagagaggagg(GA)7	40	120	attttataaggatagagtgagagagagaaaaagagagacAGAGAGAGAGAGacagacagagagagagacagagagagaaagtgtgtctgtaaataaagagaggaggGAGAGAGAGAGAGAgtaagttaataaatttacaacatgaccaatttccagtcattaaaaacaaattctatggatgtggttctccttttacagcatgtagagcgtagttgatgctagtgtctttaatccatctccattctcgaaacacgggtaaatataacattccgtgaactaatcgtgtgtgcatgtcgtatcgttctaacagagacttcagatcttcagggggaacgaacttttcccaatcatgtgtgccgactggaacaacacggaatatgttctctgcagcatacaccg…	unnamed protein product, partial [Tetraodon nigroviridis]	Zebrafish DNA sequence from clone CH211-150G2 in linkage group 7, complete sequence	Chromosome 8 SCAF14465, whole genome shotgun sequence {ECO:0000313|EMBL:CAF96447.1} (Fragment) OS=Tetraodon nigroviridis (Spotted green pufferfish) PE=4 SV=1
TR29535_c1_g1	1007	p3	(AAT)5	23	37	gtttataccagctaacaaattaAATAATAATAATAATtcataaaagtgagtgatgtgaaacaaaataggtgttttacaatacaaacgtatatggagagtaattccaataatcacaatagtaagaaaaacgcattgtaactaagttaaaaaaatcacagctgaattttatttcagtcagctccattgaaatttgcaaaacaatgataagaatagcaaaagtcatcattatttattagcccttaattccttttatttgtgatgcaagaatcttcaacatgaaactgttatggtttttgaaagctaagtaagatgtgctaaatttaaatacagaaagaac	#N/A	#N/A	#N/A
TR42521_c0_g2	1714	p2	(AG)6	1672	1683	gttatcaaattcttaaaaataaggaatttaaaaaagcaaaatagccaattttgaatcttttctagcaaaaagaaaaaaaaatcgcaagtcatgtacatcaaaagtaaacgcccgaagcagtcaaactccgatttatttcaaattcaacaaacatacattcgtagatgaactaaaagtgttgattaacggtgccaacatttcacagtcagcttttatggagattttatttaaaaacttaaaaaagaagtaatatatgcatatcaggaatcgccatttagccttcccacgcagcgaaagagaAGAGAGAGAGAGaacattttttatattagtatgtcaattcaaa	#N/A	#N/A	#N/A
TR20758_c0_g1	3121	p2	(AT)8	714	729	aaccagaaaacagataaaacatgtttatatttgaaatattgtatcaattggaaagaaaaaaatgcaatggctaaaaatcagtcaaaaatgttttaacaaccaaaagttgaaatataaagcatcacagcatgtcaaggactaaacaaggcaggcagaccacattgcattttatctagaaataccatcttgttttccagttctttgtttaacctaaccttcccgtcatatggtagccacaaaacggctgtttggatagtggttgcttatatcagctggcatctcaatacactgatttactccATATATATATATATATgtgcattttaatgcaataaataaaaaaacaaagagtgcagatcctaatcagacaaaatacacgtgtaaatggaggaaaaagaa…	#N/A	#N/A	#N/A
TR51749_c2_g1	4439	p3	(TGT)5	1467	1481	agctggttctgggtctcattaagtctttcggataagtttttctccactttctcccaggtggctgtttgagcattgaatgttgcttgaagattctctatttgtcttagcagtgggcgggttgctaaggagacaccctgggtaagttcttgggttctggcctcatcttcttgtagttgcttgtgtagatcagcaatctcttgtttgagaagatcttctctacggttgtactctttctccatcctggtcaggcttagtctgtgatcctctatctgcatgttcaaagattcaacagtccatttaTGTTGTTGTTGTTGTttttccagggacattttcagttcttctcttacatgcatctcagcactgagggccgcctcctgggccttactgtcctgggctgcc…	TATA element modulatory factor, partial [Tinamus guttatus]	Dicentrarchus labrax chromosome sequence corresponding to linkage group 1, top part, complete sequence	TATA element modulatory factor {ECO:0000313|EMBL:KGL75991.1} (Fragment) OS=Tinamus guttatus (White-throated tinamou) PE=4 SV=1
TR44619_c0_g1	1222	p2	(TA)14	1194	1221	aattaaatgtggtaattccctaaacaagcattagcttacttactctagagtgttttctgaactcacagcaagactcttgttacacaagctatgaataacaaacgataatacagaaataagaaaagaagcaaaaatgcaactttaaaacaatacataaaagtacatcaaaatgtaaaataatggtaaaaagcagcacagcaactaaatctccattcacacttaatttcaaaaaggcctagtagacataaggcttatatcacaaaataacgagattcatttctatcattcaaccggtacgagTATATATATATATATATATATATATATAt	--	Zebrafish DNA sequence from clone CH211-251M11 in linkage group 10, complete sequence	--
TR50714_c0_g1	1404	p3	(CTT)5	1076	1090	tatctagataaatttatttatttcatggctttcggtgaagtcccttttgctatttagtgtgtgtgtttggtaaatacatgtagagccttttgttttgttaaagatcattgggcaaatgataatccagtcaaaaatgaatatatttatttacctaaactggccggtattcggtaagtttgctaaaatacatgtttgacataacttatgttttccctttagaaggacctaaatggttcttacgaactaaaaatcccaaattatgaaatcggaaaattaaagattaaatgtttaagaaacttcCTTCTTCTTCTTCTTggtcaaagataaaaaaacccacaattattgttgttgtcaataatcacatttcaacgtcaaaatacttattgatcataactaaac…	#N/A	#N/A	#N/A
TR41090_c0_g1	1045	p2	(TG)6	436	447	acaaaaggctatgcgtgaattgttctttttgtcacgattgttttccaaagttagtgtgatcgtacttaggctcgtttagaactaattcagtattcttgtcaggttggtttactttcgttccgggattgttgagcttactgtatgtatcatcggtagcaatcacagttacaccagtattgagttttcctgcagatttgtcgatatgggagtacgtgtcattgtccgctttcatagtttcatcagacttcggctttacagcatgtgaatatgtgttatcttggttgtagccactctggaggtTGTGTGTGTGTGagtaagttggatcacttacagcggtagtcatagacttcaaatgtccgtaaccgtattcatctaaaggtattaggttgttactgtctg…	PREDICTED: mucin-2-like [Maylandia zebra]	--	--
TR21613_c0_g1	1192	p2	(AT)6	90	101	caagatcagtcatcatggattggtcagctaatcaggatctacactggtcccgcttgtgataaaatctgtatatatggagtagacagtaaATATATATATATgaagattaagaataaaaataaaaagatgtattgtactgacaaactcatgatttaatgccattttttgaaaatagtacaatatatttcttagttgctttacagaggttgataaaataaagttgaatggcagttaaaaatacttggacacttattagctgcataaacataaatttaattctttttaataagcctttaactcaaaaatgttgaaatgcacaataatcaaaccttaaaaagcgtaatatttgcagtaaatttcaggtcaaagtgttttgaaattgtaaactgttatagtctt…	#N/A	#N/A	#N/A
TR10668_c4_g1	1695	p3	(ATA)6	379	396	gatccagatcagctggcacattcgtgctgtctgatcaggatcgcactggttgcattttgtgcagaaatagcctaaagaattataaagcaaacagcgcagatcctggtcccatttcagccaatcagatgcttgagatttgggactggtttccagacttggttttataaccttcagaccaggttttatctcgggtgcaaccagtgaacatctgatcctgatctacacttgtcaaacatgggttataaaccatattcatggagtaaaggtttaacattctatcaaatgaaatcaaagattcagATAATAATAATAATAATAaagagatgctcatttgtactatgtggcataattttatcattactgaatctttgatttagaatgtaattttatattgttatt…	#N/A	#N/A	#N/A
TR44546_c0_g3	1744	p3	(TGT)8	1711	1734	atgattttatgacaagatcagaggtaattatcaattgcagatcctgatcagacgcagatgtgctggatctacagtggtcttacaagcgtaaaaatgtgtaattatgaaataaaaggctgaggcagtcagaggcgcagttgttttataaattggactatggcagtctctgttttgaatgggattaattcaacgctggtgtccattgctggttgactacttaaatttgtaccagcagtactttttaccagcagtattggccaaaactggatgctcggctggtaaaagaccgagtgactgccaTGTTGTTGTTGTTGTTGTTGTTGTtcaatactag	PREDICTED: carbohydrate sulfotransferase 11-like [Cynoglossus semilaevis]	--	Uncharacterized protein {ECO:0000313|Ensembl:ENSXMAP00000001341} OS=Xiphophorus maculatus (Southern platyfish) PE=4 SV=1
TR42267_c0_g1	1346	p3	(TGT)6	1022	1039	cccgcattgctaccactgttgttgttgccactctgtgatttcctcatccaggggtatataactggttgtcccccttgctccttcgaacacgccgagtctggtgagccctgacttcctggtgatggtaccgattccgggcttcctgatgcctctggagattcaggctctgtaccggaactgggcggtgtaaatccattcaatctgtttgaagtgtttacactgttagtcgtattatgaaccgttgagtttgtaacacttgttgtggaattcggcgattgcacgtgcgcttgtggcggtgacTGTTGTTGTTGTTGTTGTggctgctgatgatgctggtgatgattgtgttgattcagtcttttgcttaaactgtcactagcacatgacacaggtgtctga…	PREDICTED: homeobox protein Hox-B4 [Larimichthys crocea]	Scyliorhinus canicula Cluster_HOXA sequence	Uncharacterized protein {ECO:0000313|Ensembl:ENSONIP00000007795} OS=Oreochromis niloticus (Nile tilapia) PE=3 SV=1
TR9635_c0_g1	1029	p2	(AT)7	132	145	gcagtatgggcatatgcatttccattactgcccattaacaggctcaatcaaactgagcctgcaatattttcttatttgtcgtgttcggtagctttcaaagttccctttacacctatttaatatgtaatttaATATATATATATATaaacaggaaataccagtgggagaggtagtaccaatagctaataaggattaaatcaattaatcaattattgtatttgaatgtaaggctaaaacacttcagatgactcaaatattttttctattctgataaatatatattaacaaattattgcctacacttacactcctgaattttctcatttcttcaaccaaaatcagaaaaaagtgttttctattggaatgttgttttttcaagttaatgatacaagcatagtc…	#N/A	#N/A	#N/A
TR57371_c0_g1	6626	p3	(CTG)5	2191	2205	cgacgggctcgtgcagaagttggaagatactcttcttcatcttctattggtggtgtggaaggcatctgtcgagctggggcaggtggttctgtgttaactgctacaggttctagggatgtttccaggtccatgacaggctcttctgacatctctgtcgccattctcagcgccatctggagcatgtcctctcccaagtcagcacttgacgcactcgcagtgacaccagtagaggcagcactggccactatgctgggagcaacatcccgcaccacaggttctggaatagtgtcttcctcttcaCTGCTGCTGCTGCTGgactcgtcctctttccccgctacagcctctgccatcatcaacaactccgcctctaatggatctgccggtatcttctcacgtatt…	PREDICTED: zinc finger MYM-type protein 3 isoform X4 [Anas platyrhynchos]	PREDICTED: Ficedula albicollis zinc finger, MYM-type 4 (ZMYM4), mRNA	Uncharacterized protein {ECO:0000313|Ensembl:ENSPSIP00000012706} OS=Pelodiscus sinensis (Chinese softshell turtle) PE=4 SV=1
TR49229_c0_g2	1335	p2	(TC)7	633	646	tcagcgttgtctgactgcgcatgtgtgaagacgagaatacattcctggataatactactggcacttcataagaacgtaaatcagtgttgtctgataattattgctaaattaacaaagcttggcatcatgtagctttagtagatgatgggaattattctcagacaaacaaaatgcattattgtttccgattcttaaacggtgaatccatcgtgattaaatcattgctacgttcttttatttcttgtttggttttttgattatttttacttagttatattataaaccaattagctcatttttTCTCTCTCTCTCTCtttatctggctgtatattctataaaattcatatgtaactttttgtcaagtgtttttgctaacatgcaaacatgcctgaagaagaa…	#N/A	#N/A	#N/A
TR45298_c0_g1	3179	p3	(TTG)5	2555	2569	gagatcaaacagaaggacatcgttatatcacaactgcaggtcatctccaccaagtccaaaacattcagaaacaaagcagactggttagacaaggcgttagacaccttcaaagatgcattcttaaaaaccacatagaagtaaatggaacaatagtctatcagaaagtcaacaggattaaacatttcttatgaaaatggaaaaatatttagatattaaagaacaaagataacttgggtgtttagaatcctatgttcttgtgccacgagataaagaaggtagtggtctgtgtcattatcggttTTGTTGTTGTTGTTGttactgctgcattcagaatagggagctggtacactaggctgatggtttcagcctaaaccagtgcaaggaggaatgagggatagc…	unnamed protein product [Oncorhynchus mykiss]	PREDICTED: Xiphophorus maculatus mitofusin-2-like (LOC102236418), transcript variant X2, mRNA	Oncorhynchus mykiss genomic scaffold, scaffold_674 {ECO:0000313|EMBL:CDQ74043.1} OS=Oncorhynchus mykiss (Rainbow trout) PE=4 SV=1
TR35261_c0_g1	3755	p3	(GAT)6	1334	1351	aagaaactagacaacatcaagaaggatcacgagaaaagggtcgaggggctgcagaaagaacaggaagtagacaagaagaagggagaactcatagaaatgaacctcgatctggtggatcgagctattttgattgtaagaagtgctatagccaaccagatagactggacagagatccacaaccttgtgaaagaggcccagattgatggagatcctgttgccatggcaatcaaagacctcaaactggcaaccaatcatatcacactcctcttaaaaaatccctatgttgacagtgattttgaaGATGATGATGATGATGATcccattaaaccaatgagagtggacattgacctagctctcagtgcttactccaactccagaaaatattttgaaaagaagaag…	PREDICTED: nuclear export mediator factor NEMF isoform X5 [Chrysemys picta bellii]	PREDICTED: Merops nubicus nuclear export mediator factor (NEMF), partial mRNA	Colon cancer antigen 1 {ECO:0000313|EMBL:JAB54549.1} OS=Micrurus fulvius (Eastern coral snake) PE=2 SV=1
TR44304_c0_g1	1446	p3	(TGA)6	622	639	ggtgattgctataattttctatccagtaagcaaaatggaatcctaaagccatatataatacaactactccatccagccacttcaccaaaatagtctgttaagtacaggataaaacaagattaaacaggttatggtatcatatgttacaatgtatgactgtaaggtaaaaatgtggctaacaccattttataattaagacacaccattctattgagatccattttatgggattttataagtgttgaagttcatcgaataatcacttactgtaagaaatgatgctgatgctgatgctgctgcTGATGATGATGATGATGAttgggcaggggacgttaaactgtcattaaaataagcacttctaggaaaatgtttgttttgcaacaattgtttcaatgtatt…	--	TPA_asm: Oryzias latipes strain Hd-rR, complete genome assembly, chromosome 12	--
TR50768_c0_g1	1860	p3	(CAA)5	1688	1702	ctgggcgtgccatccatggatatcccaaccttgatttattatgatgactacctgattatgacctacaatgacctgaggatggtgggtctgcatgaattcctgaaagatcagagttacaacggtcaattcttacctccacgagtgttcaacaactacggacaaggaacagacagcatgggcaaccagaataactacaatctgtttaccacaagcttccctaatcagtatccaacacaattccctaatcagcaaacaatgtacccaaacaacatacctgactatatataccagcagcgtctgCAACAACAACAACAAggcggcaatttatattcaactccatatccaaataatccctatccaactacccggtacccaaatcagtatccaaaccaacagtat…	PREDICTED: periostin isoform X5 [Serinus canaria]	--	Uncharacterized protein {ECO:0000313|Ensembl:ENSMGAP00000015961} OS=Meleagris gallopavo (Common turkey) PE=4 SV=2
TR25848_c3_g3	1579	c	(A)11caactgattttatgatcacagcttttaaccctatactcctaagagttaatggagtcaggtgtccttcaatggaat(A)11	880	976	cccgtatgcagaaactgggccagaaatatttgcagccaatgtcataccagaaaattatttagaaaaagtgatagcaatttacgattaccaagccgataaagatgatgaattgtcattcacggaaaattccgtgatttatgtgttgaagaagaatgacgatggatggtatgagggcgtgcttaacggacaaacgggactctttcccggaaattatgttgaaccatgtatatagaaatataattcacttccatcagtagattagctgagttctgggaatttgtgtcttacgagtttaaaacgAAAAAAAAAAAcaactgattttatgatcacagcttttaaccctatactcctaagagttaatggagtcaggtgtccttcaatggaatAAAAAAAAAAAca…	PREDICTED: abl interactor 1-like isoform X4 [Neolamprologus brichardi]	--	ABI1 protein {ECO:0000313|EMBL:CBN82148.1} OS=Dicentrarchus labrax (European seabass) PE=4 SV=1
TR39458_c0_g1	1250	p3	(AGC)6	458	475	atacagcgagatgattgttaaggctgtaacagcactgaaggaacgcggaggttcatcaagacaggctatcttgaagcacattctggcaaacttcaatgttggaaaagatgcggccgctgtcaattcaaggctaaaggtgtctctgaagaaatgcgtagcaaagggtgtgcttaaacaatccaagggcaagggagcttctggatcattccgcgttggagagaagaaagccgagaagaaggcaaaggcaccaaagaagaagggcgataaggcaaagaaagccaagaagccacgtgctaagaaAGCAGCAGCAGCAGCAGCggcacccgaaggtggagaaggtgcagcaccagcaaaacctaaaaaggcaaaatccccaaagaaggccaaggcagcaaaacc…	PREDICTED: histone H1B-like [Xenopus (Silurana) tropicalis]	Cyprinodon variegatus beta-actin mRNA, partial cds	LOC100145531 protein {ECO:0000313|EMBL:AAI61211.1} (Fragment) OS=Xenopus tropicalis (Western clawed frog) PE=2 SV=1
TR25507_c50_g24	1953	p3	(TGA)5	566	580	tgcaatggattaaatcagtattatatagcaaatttacatcaacaatttacgacagactaaatagaaattccaataaactccaaaattgtacaactgacatcatacagatttacagtagattgtacaaatacacatcactactctgtaacacccagatttgttacctctttaatcaatcatcaagtttataattgttagtgttttgtaatttttgttcaatttttaagaaattgcttttgttaccatggttacccattctccagaactcttcaaaaagtttctgtcagtataatgattgatTGATGATGATGATGAcgatgatgcaataatcaaagtaacaaatatcactcaatacactgacaaaaactttgtgaacacagcatgcctttttacacacct…	ADP-ribosylation factor 1 [Xenopus (Silurana) tropicalis]	PREDICTED: Merops nubicus ADP-ribosylation factor 1 (LOC103781791), partial mRNA	Arf2-prov protein {ECO:0000313|EMBL:AAH42337.1} OS=Xenopus laevis (African clawed frog) PE=2 SV=1
TR29351_c0_g1	1028	p3	(TGT)6	94	111	atagggccatcagcttaaaaatacttgtatatttaatgattggcataataattctgaaatgtgtaattgttgtgatatttgacatagcttgtcTGTTGTTGTTGTTGTTGTttactggcgcttatcaggtaattctgtgattgtttattttgtattcctttatttaataaccaaaacaatctgcagaattactccatctttgctttaaacataatgtctagtaactagtttccacacgccagtaaaatatactgctttatgataatataatgactgtttactcagtactgggtcttacaaattaggtataggtataggaagacggaatgaaccagatgagctatacctctggttatatcaggattttacaatagaaatctttcattagttatgtttccg…	#N/A	#N/A	#N/A
TR421_c1_g1	2424	p3	(TGT)5	1768	1782	tcctcatatctgagtttggtgctggtaaggatatctcttgcgtactgcagctctacctctagtctacgaatctttgactgagcatccaggtccatctgtccaccaagtccaaagctcatgtcatccataaacatcgggcttccaacaccaaacaactgagcttccggcatcaatggttgttgcagctgttgctgtaactgctgctgaagttgttgctgctgcctttgaaactgttgttgttgtctctgtagctgcttcattagctgttgttgtcgcaactgttgctgacgctgtagcatcTGTTGTTGTTGTTGTtgcatctgttgaccactggacatcatggaaccagtcatctgaccactggacagcatggaaccagtcatcatatcaggataagct…	PREDICTED: fas-binding factor 1 homolog [Alligator mississippiensis]	--	Uncharacterized protein {ECO:0000313|Ensembl:ENSPSIP00000013844} OS=Pelodiscus sinensis (Chinese softshell turtle) PE=4 SV=1
TR10585_c1_g1	1059	p2	(GT)6	273	284	ctaatttctttcaattcacattttgactgggtattatatctgttgtaacccatttctgcgaggggaactggctaacatctgacttggatctacactggttgcacatgggacaaaatcagtatcagcaaatgtttgtaacctcccctttttgtctgttacaaaaaaaaacctttctgtactctcattgtaggggtctatccctttgaaatggtgagtttactatcaataagatttatttactacaactttttctctttctgggtggtggggtgGTGTGTGTGTGTtgggataattataaaatgtatgacttgacaagttatctccctttataacacattttaatgaagggaagggaagtgaattgacagtatccttatgtggtatggcagatcacatctt…	#N/A	#N/A	#N/A
TR55311_c0_g1	1225	p2	(TG)7	718	731	ttattgtttgtatatgttatgacaaaagttttcatatcattcaaactacatatgaaacaacccagagaatttattaaattaaaatgtcttctctggcatttgttgaccagaattttaaagaatatgttaacttatcgatttgtcatccaagttgttttcatttaagaacatttattgtacaacattattataaaagttgtagttattaccctgttgctcatacattacgacacaaagaaaaagtttgacaacaaatttatcttcttattcagaagtagtcatttttttatgggtttttttTGTGTGTGTGTGTGatttattttcagacaaaaatcatttatttctttggtaactggtaatatttaaggataccttttcggtttttaacacatctatttg…	#N/A	#N/A	#N/A
TR20201_c0_g2	2563	p3	(CCA)5	22	36	caaccacccacccatgaccacCCACCACCACCACCAcccaccactacagacaatagtgatgggaatcggtccacaaacccaagtcgattaatcggtcttctaagaagaattaatcgccgattaatcatgattaattttaatacatgcaaaagttcaaaatatcaagaatatttaagatctctaatgtaattttgctttattattaaatggtttcacttgacaatcccacatgtcaaaaacatatactgaacaaaagcttagatctttgtcatatcacttgtcagatcacaactgtcataaaacaaaaaagaaatgtcaagcaaaatagtttaactg	PREDICTED: zinc finger BED domain-containing protein 1-like [Oreochromis niloticus]	--	Uncharacterized protein {ECO:0000313|Ensembl:ENSLACP00000006148} (Fragment) OS=Latimeria chalumnae (West Indian ocean coelacanth) PE=4 SV=1
TR46708_c0_g1	2294	p3	(CAA)5	1888	1902	tcctgccaatgatatccagtccaacagaaactggttttggctgtttaatcattgccactggtgtacctgtttattttgtgtttatttattgggaaaacaaacccagggctatcactggtgcagtagaaaaagtaacgttagtactgcagaagttaatgatgtgtgtaccagaggaagcagctgagaaaaagggatcataaaggtagaataagtagataagatcaaattttgaatgttgtcagtatgtgaacagcttatatttgtggtgctgggttcactacattcctcattccacaacagCAACAACAACAACAAttgaagaatggaacacctgtgcaggcagaaaaaaaaacaaatacttgatttagttaagatcttgaagataagcagctatctaat…	solute carrier family 7 (amino acid transporter light chain, L system), member 5 [Xenopus (Silurana) tropicalis]	--	Uncharacterized protein {ECO:0000313|EMBL:AAI68472.1, ECO:0000313|Ensembl:ENSXETP00000036178} OS=Xenopus tropicalis (Western clawed frog) PE=2 SV=1
TR48096_c0_g2	1445	p3	(AAC)5	760	774	taaaatgattgaaggatcagctgtgtgctgctgaattgatagacactggagagatagaaataagaattttaaaatcactaatttttacagattgaacgtaatttgtcttaaaaaatatacccacaatatagctattaagtaaaccatattttagttcttatttaaaaaaggggtaatgttaatactggatttggggcatttttctgcatatatttaacggggacaagtgtacgtgataaataaaatattaacttgtttaaaattacgctgattcagcggtaattattatgctttcaaacaAACAACAACAACAACaaactttgttgtaaagtaacagacaagtaaaatataacagcaaattctaaaattttctgaaaagtgaaatgcgaacagtttttt…	#N/A	#N/A	#N/A
TR24422_c0_g1	2356	p2	(AT)6	2012	2023	gactgcatgtgctctcattgatcgagaatcttcaagaactgaatgtgcatatcggtggctgaaagacttataaaagactaactatacgtcaatgatcgagaagaactggatgtattcaaggaatacctgtcaagtcaattgtcgacaatctttaaaagaacatgatattattcgtcaacagtatttaaggacttactgtcagtggtcgtgcatcttcaaaaaccgaataaatcatctgctgcagacagaacaaacggtgatgactatacgttgcaaaactaaaattagctacgaaattgaATATATATATATgttaacattactgaaaatataggaccaatagtacgaaattcactgattttgccctgacttattattcaaaacttacatacattatgg…	Thyrotropin-releasing hormone receptor, partial [Ophiophagus hannah]	--	Thyrotropin-releasing hormone receptor {ECO:0000313|EMBL:ETE63409.1} (Fragment) OS=Ophiophagus hannah (King cobra) PE=3 SV=1
TR27950_c1_g2	2993	p2	(AT)6	1027	1038	aaaaaaaactgcagtccgcgtgattttaaagagtgctaggtatcgagaacgctattgttaaaacctcgctagtctaaccacctttgaaactggaaagtggagtggtctttttttttcaggtaggaaatagtgcaaatcttaaaaaaggacattagaatggtgatcgtattatcggtcttaatttcatgaagtcttcataacttggtttactgtatttttgtcagcagtcttctgatgtgtagagagactgtactgtacattttactctgacatcgagttacatccaaaaatgtcattatcATATATATATATcaaatgtctaaaaacacagcacagagcacctttgcaattgtttaaatagtaagtaattcaaaattccatcaaaagcattcacgtaat…	#N/A	#N/A	#N/A
TR1400_c0_g1	1489	p2	(GT)23	1	46	GTGTGTGTGTGTGTGTGTGTGTGTGTGTGTGTGTGTGTGTGTGTGTgcgtgcttcggcagatggctgtgctttgcgatgccttctagcacctcctgcaactaaactggcaccggccttatcggcttgcctttccaccggactctttcaaacgccgaaaggaggatccttgcactgggcactaggatctccataccactcgccaaggcctgcaactggagaggtccataacactcgtccagtcctgcaactggccactccagctccgctgtctcagcgcagactcaacacggggagcagcagtcattagtgataagccttgactcattttgcgtagagctgggcgct	PREDICTED: olfactory receptor 52E4-like [Pelodiscus sinensis]	Zebrafish DNA sequence from clone CH73-144M15 in linkage group 15, complete sequence	Uncharacterized protein {ECO:0000313|Ensembl:ENSPSIP00000001541} OS=Pelodiscus sinensis (Chinese softshell turtle) PE=4 SV=1
TR26440_c4_g1	1548	p2	(TC)7	898	911	atttaaaaaaaatacaatatacacgttcactttttgcaaaattcaaccacttttttttttaattatcctgcattacaatgactccaagctcaaaattaggtgagttaaaagtgggaaaaaatcaaaataaaggagtctgcatctattgaaatcccttcagatgccagtaaaatagtaagataaataaaacagtagcattaaaacatatggaaatcgttttagttccacaagacaggagcggccgcggcagacgtgaaattcatctggatatggcatatctgttttcttgcacgtcaacggTCTCTCTCTCTCTCcaggagcctatttacactcaaaactgaccaacttacactcaaaactgaccaacgtccaccgtaagaaaatcaatacaagcaccac…	#N/A	#N/A	#N/A
TR45325_c1_g1	1132	c	(GAT)7gacag(TGA)16	1	74	GATGATGATGATGATGATGATgacagTGATGATGATGATGATGATGATGATGATGATGATGATGATGATGATGAaactgttgcagttgtgacatcgataattatgataataatgctgatgatgatggtgaacttgctgctgctgttgacgatgatgatggaaggaaatatttatatcatgtctatgcgtatccaatttttatagcattggataactattaagtttggatgaacatacaatgttattgaatatttttgtgaaataatttgaacgttaataagctttattccacaaaacgcttatgtcagttttagtgttaattccatctggactttctgtttccaactgtttgatccacgacacctctcgaagtt	unnamed protein product, partial [Tetraodon nigroviridis]	Taeniopygia guttata BAC clone TGMCBa-19H12 from chromosome unknown, complete sequence	Uncharacterized protein {ECO:0000313|Ensembl:ENSPSIP00000000504} OS=Pelodiscus sinensis (Chinese softshell turtle) PE=4 SV=1
TR38017_c0_g1	1478	p3	(TGT)6	1458	1475	cttgtatcacactactgttgtgtgacgagagaactttgatcgtcaagcaattatgtaatgttactgtgtatgtgaaaacttcattataccagtgtgtgagtatacttgtatcacaccaccattgaatgaagaggagaatttgatcatcatgtcactgtgtaaggagactgataaccagtttggtatggatatttctgtcgacatgacattttacaagaagactttgatcactattattgctagacattgtggttatgctttgatcaacacattattgtgttattaattgatttgtaaacaTGTTGTTGTTGTTGTTGTttg	PREDICTED: snRNA-activating protein complex subunit 3 [Alligator mississippiensis]	--	snRNA-activating protein complex subunit 3 {ECO:0000313|EMBL:KFO72788.1} (Fragment) OS=Cuculus canorus (common cuckoo) PE=4 SV=1
TR46132_c0_g1	1262	p2	(TA)6	87	98	acagtacagatcctgataagatagcatggatatgccagctgatctggatttagtcatctacactgtttgcccatgccataatggctTATATATATATAtggaggaaagggtaaacaataaatttttactgcagacatccaggtttggaagcaataaatgtcttcaccaaagatttgttgtgattaggtaaattttctcaacaaacaaatgtgagtagatcatcctctagtcagattagtgtcatttcattttgaatcataacaacattgtaaagattgtgtttgaatagacaatagaattctgtggtcttccgcagacaagtttggacctttaatcttgcacactcagtagcactgtatatagcccatcaggaacattataacatagatcatcctgca	#N/A	#N/A	#N/A
TR25172_c0_g1	3856	p2	(TA)8	3051	3066	aagatccaatgaacatcgttaggggaagcaaatttgctgcaaatattaaagacaaattttctttacgtatttaaatggcatttagtaaaaaaatctaaaatatttacctttaccataacattatcttacaaatcacattttataaacgttgctgtaaaacatttgctaagaccatttgcatttcggggcattgaaagattttttttcgtaaatggcggagtccacatgtttgtttatcattatgtgcaattttcttgtgtattgtatttacttttcgtagaagacattaaagtagcaaggTATATATATATATATAtcatttaatgatacaagggagtaaataccgcagttactttccagatttgatcacttttaacgatttatctcgggccatcaggt…	PREDICTED: pro-neuregulin-2, membrane-bound isoform-like [Notothenia coriiceps]	--	Uncharacterized protein {ECO:0000313|Ensembl:ENSTRUP00000016771} (Fragment) OS=Takifugu rubripes (Japanese pufferfish) PE=4 SV=1
TR51756_c1_g2	4558	p3	(AGC)6	1474	1491	atttaattcatcatttctcaagctatgtttcattccataccagtccaaacctgaacgaaatgcaatttgattgccagtctgttcagtacctttcatcattcacattccctattcacaaaccacagatatttttacgaaatctgaaatcttccaatgacatctcccattaagaaacaagatttaaacaccaatcagtgatcaaatgctgatatgtccaaagaaatgcattatattttatctttttaactgtctcccatgaattcagctgtggcacaaacttgattccgaatgttctcacttAGCAGCAGCAGCAGCAGCagtggcagtggttgctgtccttgggccatcacgttcccttggggttggtggtggtccatctcggtcacgacgatcattgcg…	PREDICTED: la-related protein 4, partial [Callorhinchus milii]	PREDICTED: Cynoglossus semilaevis La ribonucleoprotein domain family, member 4 (larp4), transcript variant X3, mRNA	Uncharacterized protein {ECO:0000313|Ensembl:ENSPFOP00000013281} OS=Poecilia formosa (Amazon molly) PE=4 SV=2
TR51732_c2_g5	5669	p3	(CCA)6	5255	5272	atgccaccccgtggtcctccgaatcctcccataccgttggagaatccaccaccacccatgtcatccttggaagccaaaagttcaaggaccatctctttggctctctgacacttcatctgatctccagtgatcctcagaggcttgtcaaatgctgtgggcgtgttactgtcctgaatcatcaccatcttcacgccacatttctcctgtaattgtttgattgtttcacctcccttgccaatgatgaggcctactttgtttccagggacagagatctcaatattgcccatgttgtcaccgtagCCACCACCACCACCACCAccgccatggtcggagccctgtgctctctgtatgatcttattgatttcctccttgactttagctatagactgtgggctccct…	PREDICTED: far upstream element-binding protein 2-like isoform X3 [Notothenia coriiceps]	PREDICTED: Larimichthys crocea far upstream element-binding protein 3-like (LOC104925096), transcript variant X5, mRNA	Uncharacterized protein {ECO:0000313|Ensembl:ENSMGAP00000009788} (Fragment) OS=Meleagris gallopavo (Common turkey) PE=4 SV=1
TR52241_c0_g1	1160	c	(T)10aaatggctaatttaaa(T)22	21	68	tttttttgtaaattttttcaTTTTTTTTTTaaatggctaatttaaaTTTTTTTTTTTTTTTTTTTTTTgtttttcctttaatgttttatataatacatgaaaacagtgtaacttgaagatgataggacattaatacttttactaatacgatttgttttctagttcacgatctgaagattttaagacaagacgagtatcaatattttttattacttgttttcatccccatttgttttagagtgttcctttttatgagacataaacagcgtgtaggcttgccagttcctggagtacagcgtattttgtagctgaaaactgtgtatacttctttaataattttggtacagtgatgacttttcaagtttcgt	PREDICTED: complement C1q tumor necrosis factor-related protein 3-like [Maylandia zebra]	Xenopus (Silurana) tropicalis RuvB-like AAA ATPase 2 (ruvbl2), mRNA >gi|49250466|gb|BC074678.1| Xenopus tropicalis RuvB-like 2, mRNA (cDNA clone MGC:69398 IMAGE:5335377), complete cds	Uncharacterized protein {ECO:0000313|Ensembl:ENSONIP00000009319} OS=Oreochromis niloticus (Nile tilapia) PE=4 SV=1
TR7667_c4_g1	1708	p2	(GT)7	151	164	gtcgtgtctaaaaacggggtcggtgtcaagaacccagtctcctcatacggctaagaggataccgatcattccacgacttgagtggaaaaatgaaaccactttaaaaggagcgcatgatcgtttggtgtaacccagtttgcttactccgtaGTGTGTGTGTGTGTgaaccgtattgtagcacatactgtttttcagttttcggacaataaggtaacacgtgatattctacaggatgttctcttttcgctggctggttctcgcagtgttctgcgcattgctgatacaaggactctctgcaaagaaggacaaggacaagaagaaagacaagaaagataagaaaacagacgatgagagtgatattgacaaactaaccgatatggttgaagctctggaagccag…	superoxide dismutase 3, extracellular [Callorhinchus milii]	--	Superoxide dismutase [Cu-Zn] {ECO:0000256|RuleBase:RU000393} OS=Callorhynchus milii (Elephant fish) PE=2 SV=1
TR182_c0_g1	1028	p4	(GACG)6	1	24	GACGGACGGACGGACGGACGGACGgaccgctactactggaatgtagctattggagacagaaacgtatattccatttgtgcccctttaaaagtcgcagcactacaaactacacacaacaaagaatacactgattatatttttgtgttatattgtgttttatatacagtaattaattttcacaatcaaaactgttatgcatatatgttgtcctgcttgctttcggcgatactatttttaccacaatttcccgggaaagcctgacatagctttttgttgacgatattctattatttccatgcgttctttgaactccttgaacatacg	myosin heavy chain 3 [Lethenteron camtschaticum]	--	Myosin heavy chain 3 {ECO:0000313|EMBL:BAO24699.1} OS=Lampetra japonica (Japanese lamprey) PE=4 SV=1
TR29682_c0_g2	1385	p2	(AT)9	1165	1182	tgtcagcatatctggatctacactttttgcctatgtgataaaagacatatctatggagtaaagggataactgtaaagttgcacaatttgaacaaaatctgtgactttgactagggcattatatgtataaattcttaacttccacaaaagttttttcacaattaccaattaatacatattcttattcaccatcagtaagtggtactgtgttcatgtctttccaacaacactgaagaaaccaaacattgaagcttgtgaacttctgactagatttggaagtaaatgccacataaatttgcaaATATATATATATATATATttgttaaacagcaaaaaataataacagaaagaacagtaagtaagtttatactactatactatagggatgtgattttcttaa…	--	Zebrafish DNA sequence from clone CH211-286N19 in linkage group 7, complete sequence	--
TR28771_c0_g1	1867	p3	(CAA)5	1275	1289	gaccatatatgatgggccctcaaggtatgcgacctccgggtatgatggggcctcgtggtaacatgatggggcctcgtggcatgatgatggggccaggccctatggggatgggacccggaccaatgatgggcatgggtcaaatgccacctcaacagccagaagtgttccagggtgaggtgtttgagccacctccggaagagaagaagccagttgtaactacatcatcaacagcagttactacatccacatcatcctccacatcaacaacagctgcatcatcgtcatcaacatccacatcatCAACAACAACAACAActgtcacatcatccacacagaacaaaccacctgtcaaacaggaggtgaacaaggatacaaaacaagaagtcaaaactgaacttg…	PREDICTED: transcription elongation regulator 1 [Anolis carolinensis]	--	Uncharacterized protein {ECO:0000313|Ensembl:ENSGACP00000002060} OS=Gasterosteus aculeatus (Three-spined stickleback) PE=4 SV=1
TR10450_c0_g1	2356	c	(CAG)5ccttccccagcaccgagacagcaggtgaagacaattatctccaagcctctggatgatgta(GAT)5	1389	1478	ccagccaggcctacagcacaagtcaagacccagtctgcaccaaaaacacctgcaaggtcacagagccccgtacagcgtggtgtaagccctaggaggccggagagctctctaaggcagaccggctccagtgtggactacaccagcactcagtgggactcggatgaagaggagagtgaatcagaagatgaggagccagcctttgcccccaggggaccagtcacagtgacccctgctagacctggagcagtccctccttcacccaccagaccagggttcccaacccctcagtcccggcagccaCAGCAGCAGCAGCAGccttccccagcaccgagacagcaggtgaagacaattatctccaagcctctggatgatgtaGATGATGATGATGATtggcttgac…	PREDICTED: zinc finger protein DZIP1 isoform X4 [Stegastes partitus]	--	Uncharacterized protein {ECO:0000313|Ensembl:ENSPFOP00000011451} OS=Poecilia formosa (Amazon molly) PE=4 SV=2
TR32875_c1_g1	2344	p3	(TGC)6	1074	1091	tcaataatgaaattcacagcctcttctaaacctagcaggtatatgaagtctgggctagccagacttggaataaaattcatttcaggcgggggaggtttgggtggtgggatctgtagaagtgttttctccagttgttttctgagagcaagttttgcagccgcttggcgctgagctggagtctcctccactctctgagttgcctgctgcatctgacgcagagcatcagcttgcgctgtggtccctctaaaaccagccaaactattctgctgctgtgtcttagatgccgagttcaactgttgtTGCTGCTGCTGCTGCTGCtgttgttgttgttgcagcaatttcatctggttctgaataagctgtcgttgatcaattcttggtgccattactagtggaggt…	PREDICTED: transcriptional repressor p66-alpha isoform X2 [Caprimulgus carolinensis]	PREDICTED: Poecilia reticulata GATA zinc finger domain containing 2B (gatad2b), transcript variant X6, mRNA	Uncharacterized protein {ECO:0000313|Ensembl:ENSPMAP00000001039} (Fragment) OS=Petromyzon marinus (Sea lamprey) PE=4 SV=1
TR40120_c0_g1	1480	p2	(TC)26	1428	1479	ttttcctgttaagataagatgacaactccccatcagttttttttagaatatttggggcgaagagttcagaaatgaacaataactaaaggatcaattactgaatttgctcagcgcctagcatatttcaaatggttattatatggaagtttgtgttactggaaaaaaggtgaaatatgctatcaggaatggccacattcgaaaggcagatcttcatgacgctttaaaatacgttatgccgagcaaaatcacgtttatactttgcaatttctatttttcaagctgacattataacaacaatgaTCTCTCTCTCTCTCTCTCTCTCTCTCTCTCTCTCTCTCTCTCTCTCTCTCTCt	--	Paralichthys olivaceus clone scaffold114_6863 microsatellite sequence	--
TR36552_c0_g1	1055	p2	(CA)31	993	1054	atatttacataagaaatcgtttaagcgatgtatcgagaagtcccccagttaacacatatttaataacagtcggaccaatgggtcgacactgtattttacagagtgttaaattaacgcagcattcatgtacccgacattaataggggaatagattttaattttacttcaactcgaatgaacgatttatggcaaatgcaaaatgtaagaaggcatgttaggatgtagacatcaaaagttgtttttcctgtgtgcaaaaaaaaagattttgttcacaattatcggcctatccatcttttacatCACACACACACACACACACACACACACACACACACACACACACACACACACACACACACACAc	unnamed protein product, partial [Oncorhynchus mykiss]	Cyprinus carpio genome assembly common carp genome ,scaffold LG10	Uncharacterized protein {ECO:0000313|Ensembl:ENSTRUP00000009728} (Fragment) OS=Takifugu rubripes (Japanese pufferfish) PE=4 SV=1
TR9620_c0_g1	1382	p3	(GTT)6	1350	1367	cataccctctggaggaccctggtcactgtctctcccatgccacgagtaggcttcttgcttaacatgaaatccagttctttaacagtcacttggcatcctaggcagtacatttcatcgctcatttcttttggctttttcagagcaagtgtcgttgctaacatggtgcaaagtacaataagaatcgaaaacgttggagtcggtgtcatttttctgttcagacaatggttcttccttttgctcattcagatttggacacgtcgctacagagaaagcgtcattttaacggaagttgttgataggGTTGTTGTTGTTGTTGTTtaaagggaaaccatt	#N/A	#N/A	#N/A
TR51525_c0_g1	2318	p2	(AT)6	43	54	gtttgttgtttatgtaaacagaagttcttggtagcatatataATATATATATATttatataatcacaaatatatcaaaacctcctatagacataatataaaaacctcccggtaacaagacagttcacaaataaacgcctgctaaaatgtgtaatttacaacaattacaaagtatcacatcaaggcaacgaggacataaaattctataatttatctgatataaaatatgaatggacaacaccatagaaatatgcaaaatgtaatagttacctgcgcatgtttatatacaacaacatgccgtgtgactagttgtttacaaaaacataaaatattgttaatcttttaacacttttgc	PREDICTED: histone deacetylase 4-like, partial [Pterocles gutturalis]	PREDICTED: Danio rerio histone deacetylase 4 (hdac4), transcript variant X2, mRNA	LOC100158627 protein {ECO:0000313|EMBL:AAI66352.1} (Fragment) OS=Xenopus tropicalis (Western clawed frog) PE=2 SV=1
TR33255_c0_g1	2504	p3	(CAA)5	1360	1374	ggtcaaatctatgtagtgaatgacgacataaatgaagcatcaactgttgccccaccgtcatccacataccaaccgccgccagctatcgttcagaacattggacatcagcaagtaatagtacaacagattgctcctcaacagccgagctccgaggctcagagacacactatgcagttatcaggagcaaccagccttgccacccaaaattctgggttttctgcagcaggaagttcccagaatgccttcaggagtgctccattgtcgtctgctgcagcacaacagcaaactctgcttcagcagCAACAACAACAACAActgcagcaacaattgcagctactacaacaacttcttggacctacggggatagatctggcattgattcctcttgcacaacaaatc…	PREDICTED: serine/threonine-protein kinase WNK3-like isoform X2 [Haplochromis burtoni]	Zebrafish DNA sequence from clone DKEY-168E3 in linkage group 1, complete sequence	Chromosome 13 SCAF14715, whole genome shotgun sequence {ECO:0000313|EMBL:CAG03377.1} (Fragment) OS=Tetraodon nigroviridis (Spotted green pufferfish) PE=4 SV=1
TR22549_c0_g2	1555	p2	(AT)7	56	69	gccagctgatctggatctacactgttcatacttgctataaaatgcttttatatggATATATATATATATtaataaacaaccttaaattgctgtattaccagccattccgggaaatcttctggggttttggcaatataggttatatgatcttgattagcatttgaaattaatttatttcaactcaaaaattttcagttctaagcatttatttttctttaaaatcttaatctcgtctttttcagattgttctgaaatattttatattggcaagaatgataatcatttatgcataatattatcccccttagttgatttattttacattttaaacagttcttaaaagcaagttaaacaacaattcatagtcaa	#N/A	#N/A	#N/A
TR17600_c0_g1	1631	p2	(AT)6	1434	1445	ggtgatattgttggtattgtgtggggaagtctccccccactgcctcgtttttgagaccactgtcaacattgctaagctgctcaataaagaattttacttgaatcgttatgatacagatttgttggtgtcacctgtctttagatgacaagatacacattttagaaaataaaaaatgaaataattgctgaatacagtttttgtttaaaattgaatgatagtgttttgtttttgtttttattataaacatatttctgcaaagatgaatgttaaaagaagagatccggtagccaacacttataaATATATATATATgtgaaacattgtcatgagagaattttagcttatcttgtaaacaagtaaattgtcttcatcaattgcatccataaataggatagattt…	RecName: Full=Ras-related protein Rab-11B; AltName: Full=ORA3; Flags: Precursor [Discopyge ommata]	PREDICTED: Latimeria chalumnae ras-related protein Rab-11B-like (LOC102363089), mRNA	GTP-binding protein YPT3 {ECO:0000313|EMBL:JAG67792.1} OS=Boiga irregularis (Brown tree snake) PE=4 SV=1
TR31146_c0_g1	2422	p3	(AAG)5	267	281	gatggcgaccatacctggcattaaatatgacgatggattacctgccatatctgcaaattgcttccctgtcagaccatttttaagacatgattatgaagaagaagctgatggagcctggctagtggcacagagagcagagcagaggcgcagatttaaggctatactgtgcacgaaacccaagacctatgctcgtatcaaagaggagagacggcgtgctgagaagcagggaaccacaatcagtgaacagcttcaggcagcagacgaacAAGAAGAAGAAGAAGagaaagaagttccagtgctggatggattcttcttgatgcgccactgctgtgtggaggacccatcagacctttgctccgttaacatctcagggaaagaaatgactgatgtgaaggaaga…	PREDICTED: X-ray radiation resistance-associated protein 1 isoform X1 [Chrysemys picta bellii]	--	Uncharacterized protein {ECO:0000313|Ensembl:ENSACAP00000021472} OS=Anolis carolinensis (Green anole) PE=4 SV=1
TR10627_c5_g4	1299	p2	(TA)8	1206	1221	tgcttccggtactgtactccagcatgttaaagaatgtaagaatagaactgagacggattttagacttcctaaacgtgacttacaacgaggaagacataaattgtgcttacaaatttaaagaaggaaattttcacagaaaacaaattaaatggtctaaagtaagcacaattaaagacctctttgagaaatcagtgcaattaaccattgataatgctgtaaatattgttgctacgaatctaaagaacaaatatggaatggactgggtgaacgaaggaattgaattgaaataaaagaatgcatTATATATATATATATAttaccatataatatgtagttacagattgtttagtgcgtttaaaaagttattcacatcccatccgaaaagccactgtag	PREDICTED: WSC domain-containing protein 1-like [Lepisosteus oculatus]	--	WSC domain-containing protein 1 {ECO:0000313|EMBL:KFP92277.1} (Fragment) OS=Apaloderma vittatum (Bar-tailed trogon) PE=4 SV=1
TR23439_c3_g1	2599	p3	(CAT)5	317	331	tgaacatcaataaaacatcaaacattcagtgactaagattattgtgatgtttacaaaaaacatctaaaataaattctggttttgatgtacagaagtagttgagcatggcttggctgtcaggtataactggtagagctgagaactttcttaacagccttgaccagacagcagccaaggtgttacatgaatcagataaatcacaccattcacccaatctctcgagccgagcctcaaccagtgaacagcctgtgagtcagccctcaggctgggcaccattctcctcccagacttctaatgtgcCATCATCATCATCATcaacaagcaagcaaggtgacctgacaccagatgcaagtctcagtgctacaaagcttaaatctgaaccaggagtaacaaaaaaag…	PREDICTED: LOW QUALITY PROTEIN: golgin subfamily A member 5 [Tinamus guttatus]	--	Golgin subfamily A member 5-like {ECO:0000313|EMBL:AFJ50215.1} OS=Crotalus adamanteus (Eastern diamondback rattlesnake) PE=2 SV=1
TR21391_c0_g1	2911	p3	(GAA)5	1686	1700	gatgctgcaaaagagtatcagcttggagatgactcgggggaagagatagacaatgatgattttggtaaagatcatgatgatgacgatgatgctgaagatgatggggagatatctttagaggaagctgaagaaggtgatcttaatcctcttattgttggaagacctggtaaaaaggccaaaactgatttctggttcagtaaagattcatttgctggtttagatgatgatgaagatgaagatgttgaaatagagaaaatggctcaggcttataagcagaaaggtggtaaaattaaaggtatgGAAGAAGAAGAAGAAatgattatacctgaagagaaggttgaagatattaaacaagtgaaaactgagaaagaaaagaaagtggatggcgaggatagtgca…	PREDICTED: pre-rRNA processing protein FTSJ3 [Stegastes partitus]	PREDICTED: Picoides pubescens FtsJ homolog 3 (E. coli) (FTSJ3), mRNA	pre-rRNA processing protein FTSJ3 {ECO:0000256|HAMAP-Rule:MF_03163} OS=Danio rerio (Zebrafish) PE=3 SV=1
TR30205_c0_g1	1956	p2	(TG)7	1589	1602	tgaaagcaagagactacgaggccggactgaggatgaaagatctgtttaaaccttgacaaatatagtgttgttacttgtacgtttgaattgcatatacgtgacaaataaatgtcacatttccaggagcttgatttctccacatatctaaaaaaaacataggaagaatggaaaaaaagtcttgtttttcagtgccaagactcaaaagtttctgattttaatattggcgaaattttatgtgcgcattgttgttattcaataaattattatgtgtgatgaaaagagtcgtacatgtaattatgtTGTGTGTGTGTGTGttttaactatgttgacattaatgcaacacatttgctttgacgtcacaatttaattgttcatacaaacccccaacaacatatacga…	PREDICTED: intestine-specific homeobox [Corvus cornix cornix]	PREDICTED: Corvus cornix cornix intestine-specific homeobox (ISX), mRNA	Uncharacterized protein {ECO:0000313|Ensembl:ENSFALP00000013824} OS=Ficedula albicollis (Collared flycatcher) PE=4 SV=1
TR48096_c0_g1	1048	p3	(TTG)5	865	879	ttttcataactagtgatggaagtatttggcgcaaattgcagtaaacagattatttaccagagctttctcatatatagacaattctatttctaataatttgaccgccgccatcttgtttgtcacgtgacctgtccgccattacaccactgcagatttcctgaaagtcttataagttatatagaaaacgctatgtagttttgtatcaaaactctgaaaagctcaaactgcatatattaataatgctgttataacttgctttaatattatattatatttttgatatttaataacacgtttttaTTGTTGTTGTTGTTGtttttttaaataagctcgcccatttcgcatccagcagaggaaatgtacaggtgataaaatccattggactggtataaaatctaa…	--	Cyprinus carpio genome assembly common carp genome ,scaffold LG12	--
TR16476_c0_g1	1652	p3	(GAC)5	296	310	atgatagatttatagttcagaaaaataaaactgttggaataaaagttacaagattttcttaagaagtgaatttgtttaaatcttttataacctataagtgtccaagggatttgatagatcttctagcgttgcaattagtgagatgctatatcgaagtcatcatatgactagtgaaataacaacagagtgagctaacttattgagatatacttttataaaaatgcggcggatgcggccaaagtctgcaccggtggataacttctgggatccggatccgttgtcacatcggcttaatGACGACGACGACGACaagccagttcggcggccggcatttactctggaagatcgtatgaacaggttccacaccaccggacgaatccttaatagaatgaaggaacg…	#N/A	#N/A	#N/A
TR3299_c6_g2	1223	p4	(GGAC)5	149	168	ggcaaacaggaagtagatgagcaaggagcatgaaatttctttacaccacatgggactataggattacgcaatatacaaaatatcaggctgctgcatgttaaagttgctgagaaaaatgtgacggaagttttgttacggacggacggatGGACGGACGGACGGACGGACaagggtaaaacagtatacccccctcttcttcgaagcgggggtataattaacctagaatgcatattagaaaaaggaaatccatgaatttaagaacacatataaagtttgtttgcattcatggaattttatctgtttttatggtcccaatttaccaattgttttaattaaaacttttctttataaatgtgttattattataataaatatgctattgcacatgtaactgcatcc…	protein Churchill [Xenopus laevis]	Zebrafish DNA sequence from clone CH211-128A7 in linkage group 14, complete sequence	Churchill protein {ECO:0000313|EMBL:ACO09780.1} OS=Osmerus mordax (Rainbow smelt) PE=2 SV=1
TR15829_c0_g1	1806	c	(C)11atttttatagttgaagaacaatttac(T)10	1410	1456	ttttaaacaaatgtcaaacaagttgtttttcatttttaactaaacctggttctttctgtatattttcatggcaaggtgttggtgtgtcccaacaatataacacgttttacgcaaccaatagaataaccctatcatgaatgtcacatcaagatgggaaaatcccaaactgtgggaaaaacaaggctgggttttcccatccaagtcagcataatatgatattcttttctgtcacaaaacatacattcatttttcacttttctgtcacattttccacttgttatattctctatgtaaaatgatCCCCCCCCCCCatttttatagttgaagaacaatttacTTTTTTTTTTctcagaccacgactcaatttttcaaatcaaccatcttacataaatggtgtaa…	#N/A	#N/A	#N/A
TR23858_c0_g1	9834	p3	(ATG)5	9401	9415	aagtagtttgaaattgaaattatagaaatgtgattaaaccctttgctttgtttaaaaacacttacaaggatggacatattgccttgaatctttcctgcattaccaaagatgaatgagcacaataaagcaagggagatgactttcaagggtatatataacatttgcattatcaacctagcttcagtatgtacacgactattgttttagggatgttaccataccctgtatattaatgttaaacctaatctagctgtttctgactactgtctgatatacaaatctcaaattaatgttacttgcATGATGATGATGATGaaatgatgatgataatgatgagagcattttgtcatagttataccccttttagctgacaatgtaatgttatgcattctttgtata…	breast cancer 1, early onset [Xenopus laevis]	Zebrafish DNA sequence from clone CH211-245E21 in linkage group 5, complete sequence	Breast and ovarian cancer susceptibility protein {ECO:0000313|EMBL:AAL13037.1} OS=Xenopus laevis (African clawed frog) PE=1 SV=1
TR40272_c7_g1	1359	p5	(TATGT)5	1247	1271	aaagaatgcaaggcaaataacccctgcaatttgttatgaatcatagaccacaattactgtccttggcaaaagataagtccttagttaccctattgctattagatataaaatcaaaatgatgttacatgtacatgattttaatctacatattctccattcttcctttttctttgtactatgtttgaactgaattgtatgcaataaaactttagcttcaatactctttattatatttcgttttattttattttatgttgtgctatgatgtgttaggttatggtatgttaagttaacttaggaTATGTTATGTTATGTTATGTTATGTtattattattgtatgattattgtctaaggaaagctaaataccgcataaactgtagtgatgtctaaagacatgtc…	--	Cyprinus carpio genome assembly common carp genome ,scaffold LG39	--
TR9355_c1_g1	2360	p2	(GA)29	2302	2359	ctgtcgctaattgcatcacaacataagctttgtgctttagagcgatgtaatgatcagaagtagtcaaatacaaaaagctacaaagactgttcgatatgccttttatagtatttattttgtactctgtgcaaaattattttcttgttgattaatttttgcatagtaaatgcctcaagtaagttgcgaccgttcagtcaaaaatcctgtttatatgcagtttcataaagctctttatttgtacgtagcacatgtcggatgtctggagctttgtgcactggtttcttatcttacctattaaagGAGAGAGAGAGAGAGAGAGAGAGAGAGAGAGAGAGAGAGAGAGAGAGAGAGAGAGAGAg	--	Cyprinus carpio genome assembly common carp genome ,scaffold LG7	--
TR25507_c50_g29	1521	p3	(TGA)5	629	643	tgcaatggattaaatcagtattatatagcaaatttacatcaacaatttacgacagactaaatagaaattccaataaactccaaaattgtacaactgacatcatacagatttacagtagattgtacaaatacacatcactactctgtaacacccagatttgttacctctttaatcaatcatcaagtttataattgttagtgttttgtaatttttgttcaatttttaagaaattgcttttgttaccatggttacccattctccagaactcttcaaaaagtttctgtcagtataatgattgatTGATGATGATGATGAcgatgatgcaataatcaaagtaacaaatatcactcaatacactgacaaaaactttgtgaacacagcatgcctttttacacacct…	PREDICTED: ADP-ribosylation factor 1-like [Cynoglossus semilaevis]	PREDICTED: Poecilia reticulata ADP-ribosylation factor 1-like (LOC103468656), mRNA	Uncharacterized protein {ECO:0000313|Ensembl:ENSXMAP00000009214} OS=Xiphophorus maculatus (Southern platyfish) PE=3 SV=1
TR4225_c0_g1	5724	p3	(GAT)8	3286	3309	aacacaactgatgagaaacaggaagatcaggaaaaaacacagaaagtccgcaaaaagccaggacccaaaccaaaaccaaaacctgagaaaattgaaactgaggaagttaaggtacctaagaaaagggggcggaaaaagaaatctgaattagaaaaggttttaaaggtaaaggaagaggaaaatggtgatgaagacaaaactgagactaatgtcgaaaaacgaaaaccaggtaaacgaggcagggggagatcacccaaggccaagaaagaggaaaagggtaaagacatggatgatgatgacGATGATGATGATGATGATGATGATgttcctagacctcaaccaaaacgaggcaggcctccaaaaaagaaacctaaagaagataaagaagaccagtcatca…	PREDICTED: zinc finger protein OZF-like isoform X1 [Poecilia formosa]	Takifugu rubripes clone 241F4, complete sequence	Uncharacterized protein {ECO:0000313|Ensembl:ENSORLP00000001411} (Fragment) OS=Oryzias latipes (Medaka fish) PE=4 SV=1
TR43132_c1_g2	1361	p3	(AAC)5	517	531	agttgggaattgttatgcacgagagctattaaaagggttttaccaaaatcggttcgcgaacataaggtaaggacagtatcacggagtagtaaacgggtgttactatattattatgaattaaaatttaaatcaattttatatttatttttgtcaaatgtcaagtcaattgctgccttcatgccaaacttttttgtaatcaccattccgatggttaccaaacacgatgggcagaaaaaaaagaagtacatgtagaaaattctaattaagcgcccccgcacacctcctgtggtcaacaacaatAACAACAACAACAACaaaacaaacagcgctatatttaacttgtacattgtcttgaaaaataattgtaaaaatgtaataaacatttgtaatcaacgtttg…	--	Cyprinus carpio genome assembly common carp genome ,scaffold 000002737	--
TR41284_c0_g1	1403	p3	(GAT)5	572	586	acatggacattagtggaatgtaaaggcagcttgcccgagcctagatctgccgctagcattttttgtgttggggacaagttgtacctgtttggtggtctcaaccaggaggcaggctggctcaatgatatgtacatgtttgatacaaatacaaaggtctggacggaagttcaaagtgaaggtaacaggccaagtcctcgagacaaactgcagggtacagttgtagacaaatgtatctactactttggaggctttggtcccaagcagaccggagatgagcacgaggattgggaagatctggaaGATGATGATGATGATgttttggaagaagaaagaactcaacaagctgcgcatttcgggtggttcaatgatctattttgctatgatacaggtagcaacaag…	PREDICTED: kelch domain-containing protein 1 [Python bivittatus]	--	Uncharacterized protein {ECO:0000313|Ensembl:ENSTGUP00000013601} (Fragment) OS=Taeniopygia guttata (Zebra finch) PE=4 SV=1
TR23905_c0_g1	2312	p3	(TTG)5	1637	1651	ctgatactgctgattatattgttgctgcaactgttgattttgttgttgttgcagttgattctgctgcagctgctgattctgatactgttgctgctgttgttggtacatctgctgttgttgttgctgatagtactgaggctgttgctgctggctgactatagtatactgttgttgaggttgttgttgctgaaggccaggttgttgttgcactacctgactatacaacacctgttgcggttgtggcaggggctgctgtagctctgtgggctgagactgtataatctgttgtccatacatcaaTTGTTGTTGTTGTTGtggctgctgttgagcggcatccggaccaacctgagtcagctgctgctgctgggagctgggtggttgtggttgctggggctgacc…	PREDICTED: nuclear receptor coactivator 6-like isoform X2 [Neolamprologus brichardi]	--	Uncharacterized protein {ECO:0000313|Ensembl:ENSPSIP00000000064} OS=Pelodiscus sinensis (Chinese softshell turtle) PE=4 SV=1
TR43274_c0_g1	1193	p3	(ACA)5	934	948	taaacgtataatacatgggaagttcacacttttttcggtccatttcaaaatctaagtaaacatattgggctagacatattttctaatcaggagagggtcactgcaatgctgatatgttttggaataggttatccaccttaagctctttacttccggtttcaaggtgaaattacttatgcacaactatattaatatcgaggatgtggaagctctgtttttgcggattcatgtgaaataagtgcagttagccaatccttattaaaatgtcgtcgcttccgtcgacatcgataaataattatcACAACAACAACAACAacgctgataatcaccaccacaactgccgtcacgatgacgatgatgagaatatttgctgaaggactacatgttaaatcttcggca…	--	--	--
TR11290_c0_g1	3980	p3	(GCA)5	2649	2663	tcctttctcgacccaacccacagttctgtcaacatcagttgagccagcaaatattggaccacgtccacctggtgtggggtttaaccctgccatgccatatggacttgtaccccaaggttctgggccagggccaatgccacgcccaccaccgcccatgcaagtaaaccaacttcctccaggatttatgcctcctagaatggaacttgtcaggcccccaggtcaacctggtccttttatgagaggtccagccccttatgcccctcctccgccccctcctgatacaggagcccctccccagtgGCAGCAGCAGCAGCAacaacagcaacaacctcctgataacaatgcaaggtttggaaatcagatttcctcagtaccagtttcacagcctgaatgggggaa…	PREDICTED: regulation of nuclear pre-mRNA domain-containing protein 2 [Pseudopodoces humilis]	PREDICTED: Larimichthys crocea protein PRRC2A-like (LOC104922523), transcript variant X3, mRNA	LOC556426 protein {ECO:0000313|EMBL:AAI55092.1} (Fragment) OS=Danio rerio (Zebrafish) PE=2 SV=1
TR4518_c0_g1	1645	p2	(CT)7	1381	1394	aagtgttctatgataaagtgatacaagtgctagcctacgtttatgtagcaaccatactttatattacataatatttacttaaatctgtttgatatttgtatattttgaattagtgcttaactattggtcagtgctcactggttagcaatctttacaagaagttattaataatatgtggagacagttaggttagacatccccttggtactcggtgatatagctgaaagttgtagctggtgatcagtgtcttattagaaggaatagaaaatgttgtcagatctgatgtttcgcctgcttcacCTCTCTCTCTCTCTcattatatactcttcataccattattgtctaagcttttcaaaatcatcacgctgtatgaaaactgttcagttctgctttctatat…	PREDICTED: microtubule-associated protein RP/EB family member 3-like isoform X2 [Oreochromis niloticus]	PREDICTED: Callorhinchus milii microtubule-associated protein, RP/EB family, member 1 (mapre1), transcript variant X3, misc_RNA	Uncharacterized protein {ECO:0000313|Ensembl:ENSONIP00000006955} OS=Oreochromis niloticus (Nile tilapia) PE=4 SV=1
TR10709_c1_g1	3136	p3	(CAG)8	2350	2373	aactcgagtaatgcacagtcttctggtgcaaagtttgttgaacagaccagtgtaaaccaggtaagatatccgactgtaggtggtcaacgagaagatcaaaatattgaaatgtcccagctagacaatggacaacttacaaataacagaaatgcggaatcttttgttttagataatcagaaatcatcaactacagcacaaaggtatgacttttatcccagcacacatactgcagcgcaaaaccaacataataccctccaatccttaccggcatctcaaacgaatatgagtggaacacagcaaCAGCAGCAGCAGCAGCAGCAGCAGccaactccgccgagttttactaagcacaccacagttaacagtgacagtcttaccacatctaaagaatatgagaag…	Golgin subfamily A member 4, partial [Eurypyga helias]	Epinephelus bruneus DNA, microsatellite: locus Ebr00534FRA	Oncorhynchus mykiss genomic scaffold, scaffold_221 {ECO:0000313|EMBL:CDQ64959.1} OS=Oncorhynchus mykiss (Rainbow trout) PE=4 SV=1
TR54192_c0_g1	1278	p3	(TCA)9	1250	1276	ccaagctggtcactgaaatggactgctttaggaccaaggcagccattttctccgtgcaatttaggcttcattggactgaagtgtttaatatcttcatatgatttcaatatcttggatttgcattcatcctctaggttttctatttcaagacaaggccctgatttccacgagtgtagaacagaacttgttattccgtgtttgatgcttagttcatcgccattgccagtatcagactctgagttatcaacccctgaaagttggtccagttcatcagcatcaatgttgttttcctctgcctctTCATCATCATCATCATCATCATCATCAtc	PREDICTED: uncharacterized protein DDB_G0271670-like, partial [Buceros rhinoceros silvestris]	PREDICTED: Poecilia reticulata ribosomal RNA processing 36 homolog (S. cerevisiae) (rrp36), mRNA	Uncharacterized protein {ECO:0000313|Ensembl:ENSPFOP00000014073} (Fragment) OS=Poecilia formosa (Amazon molly) PE=4 SV=2
TR35268_c1_g1	4846	p3	(CAG)5	1158	1172	acaagcaatgttgaggagaaagaagatgcggctatagagcagttctttaacaagggaataactctggaggatttaagtgaggcgctcaaggaagtagaaaaatccccactgagtaaacgacaaaagaagagaaagagagaccaagagcgacaacagaatcagcagctgcaacagaaccaacaacaacaacacattaagcaacaacaagaacacattcaacagcaacaacaacaaaaacagcagcaacaacaaaaacagcagcataagcaaaaacaacatcaagaacaaatgcctagacatCAGCAGCAGCAGCAGgaacatggaaacttacaggatcagtcaggtggtagggttcttacagggaaaaagaacaagaagaagggtaaagagacatctatg…	RecName: Full=DIS3-like exonuclease 2 [Xenopus (Silurana) tropicalis]	Zebrafish DNA sequence from clone CH211-10C6 in linkage group 7, complete sequence	DIS3-like exonuclease 2 {ECO:0000256|HAMAP-Rule:MF_03045} OS=Oncorhynchus mykiss (Rainbow trout) PE=3 SV=1
TR3049_c0_g1	2374	c	(CT)8tcatctctctcgcactttctctctttctg(TC)10	2222	2286	ctcagaaatgcctcttagtcaagttccttttggcaggaagaaaacaaaatagaaaaaatgagtaatcagtcaatatttggagatttggaagtggatatgaaactgaaaataacagttatcatggactgcaaaatattatgttgaatttttttttaaacttatttgcattttgtcatttgtgtacgtaaagatgcattcatatgatgaataaatattcgactctctctctttctctcacgcttcttccctctctttctcccttttctctctatcaccttcattctctctctcctctctctcCTCTCTCTCTCTCTCTtcatctctctcgcactttctctctttctgTCTCTCTCTCTCTCTCTCTCaagcttcagaaaaacactaatctttaaaaggtcg…	selenium-binding protein 1-A [Xenopus laevis]	Scophthalmus maximus clone Sma-BLUGEN003 microsatellite sequence	Selenium-binding protein 1 {ECO:0000313|Ensembl:ENSDARP00000116604} OS=Danio rerio (Zebrafish) PE=4 SV=1
TR9398_c2_g1	2428	p3	(ATG)5	318	332	atatgaaaagggctgaatttggagcataacacttgacaaaattattaaataaagctctgcatgctgtgcttgataggtttaaatgaattttgaaataatttaaaatgtttgttgatactctacaaatcttccagaaaggaacaatattctccacatactgatatttcaaattgtatgacaaaatgtaataaaatcagtacacattaaataacaccactggcattgaaaggtgagacgataatgatgttgatgaaacgtgagaacatactaatacttaaaactccggtaatgaaagatgaaATGATGATGATGATGataatgattataataataaatatttgttgatgatactaccagtggcggacaacaaaatgattatttattgtgttctttaacctt…	--	TPA_asm: Oryzias latipes strain Hd-rR, complete genome assembly, chromosome 4	--
TR9398_c2_g1	2428	c	(ATG)7ttatgatgatgatgataaggatgataatggcatataccaaaatgttttttgtgttaattacctttacaatttgtgtttttttttacttgg(T)10	842	962	tttgcataatttgtttttgtttagattatttttggaaatagtacaattttgaaggtatgtttctaatatgaaaaaggctaaataacacatgaccaaattatgaaataaagctatacttggcgtgactgataggtttttatgaattttcaaataaaaggtgaaatatttttttatactctacaaatctaccaaaatctaccagaatgaaacactattctccacatattaatatcaaaaatctctatgacaacatgaaaaaagttcaataaagatggaataatagcactgaaaatgaaatgtATGATGATGATGATGATGATGttatgatgatgatgataaggatgataatggcatataccaaaatgttttttgtgttaattacctttacaatttgtgttt…	--	TPA_asm: Oryzias latipes strain Hd-rR, complete genome assembly, chromosome 4	--
TR9398_c2_g1	2428	p3	(ATG)5	2009	2023	atgaagaaattatggaataaagctttgcataatttgtttttgtttagattatttttggaaatagtacaattttgaaggtatgtttctaatatgaaaagggctgaatctggagcttaacacttgacaaagttattaaatgaagctctgcatgctgtgcttgataggtttaaatgaattttgaaataatttgggtgaaatatttgttgatactcatcaaatctgccaaatgaaaaaagaaacaatattctccacatacttatacttaaaactcccataatgaaagatgaaacgatgatgttaATGATGATGATGATGatatatttgttgatgatattaccagtggcggacaccaaaatgatatcttattgtgttctataacctttacgattcgttgttttg…	--	TPA_asm: Oryzias latipes strain Hd-rR, complete genome assembly, chromosome 4	--
TR44160_c0_g1	1950	p3	(AAC)5	147	161	aaggtacgttacatttaacagtatggtttatacacagacatatgtacgtaacgctcaacaaagtgcaaaattatgttcgccaaaccaaatcactcctcccgcagcatctaccatgtttcaaggaaattaatccgagaaccgctaaaAACAACAACAACAACtcacaccacaagagtatgtttatctaaatgtcatggttcttacgattattcagtgtcatatcgggtttggtataaaaacaacaacaatccctactgtttatctgacaggcccatcaacgaaattgaaaacccattgacatacaaataattgtctgttaatatgaagtacatagttgtcagtaagtatgaaatacatagttgtcagtcaaaatgattttggaaaactgacaaccacgaa…	--	--	--
TR40259_c0_g1	3796	p3	(TTC)6	3394	3411	tctccatccgcagataatgtatctttgatcttctttttcttgactggttcaccttgagaatcttcgtcagatgatattctcctcttctttttggtcttcacaggcagtggcgacctgaattcgtcttctgagtcagacatttctttgagctctagtgatccggagttgatataaaatccgccaagtttagttgtgtgagtctctggcaacacttcatcatatgcttcagagttgtctatgaatgtgtcgctttcatcatagccgtctcccagtgcctgaaggtagtagtcatcctgccatTTCTTCTTCTTCTTCTTCccctcacccggtttattgtacttttcttcaaaagctctggcgattgcggcaagtttttccggatcatcatccccgaatgga…	PREDICTED: ubinuclein-1 [Geospiza fortis]	PREDICTED: Danio rerio ubinuclein 2a (ubn2a), transcript variant X1, mRNA	Ubinuclein-1 {ECO:0000313|EMBL:KFP07941.1} OS=Calypte anna (Anna's hummingbird) PE=4 SV=1
TR48801_c0_g1	3653	p3	(GAT)8	3329	3352	tgttctgaacagacaacagaaataaagtctgatataaatgatgataaaggacacagtatagcaaaagcacctagtgacattcagtcattgtgtaaagacagttcagaagagaacaaggatactttgaatactgtaaacaacaaactggataatccaacagataatgatgcctgtgacagttttaatgatgtcaatggcatttgtaatgaaatgcttgaagttgctggagaagaaagtgacagtgaaagtagctgggacaccagtagttacagcagtagcagcttttggtccagtggtgagGATGATGATGATGATGATGATGATggaggttacactcacccatcatcatgttccacttgttcaagttcatactccagtgaaactgatagtgacagtgaa…	PREDICTED: histone-lysine N-methyltransferase SETD2-like isoform X3 [Haplochromis burtoni]	PREDICTED: Meleagris gallopavo putative protein TPRXL (LOC104915683), partial mRNA	Histone-lysine N-methyltransferase {ECO:0000256|SAAS:SAAS00124033} OS=Oreochromis niloticus (Nile tilapia) PE=4 SV=1
TR37531_c0_g1	1268	p3	(GAA)11	26	58	aacaattcttaaacagatcaatgttGAAGAAGAAGAAGAAGAAGAAGAAGAAGAAGAAaatgatgatgagaaaacgtctacatacgaggagatgacaaaaccaacgcctgaagacaacacaaaggataagctttcaaacaccgaatcggcatcattccgagcgcaaaagacaaatccttctttaacagagacagttagtagtcaaagtcaacaagtaactggaccggacgaattcaacaatgacttttctaatgatcaagcaagatatttcgaggatctcgctaaagagttacaaaagctgcctaaagaagacaatacttccaaagctgatgtttcattctgggactttgcaggacag	PREDICTED: leucine-rich repeat serine/threonine-protein kinase 2 [Pelodiscus sinensis]	PREDICTED: Astyanax mexicanus AT-hook-containing transcription factor-like (LOC103025492), transcript variant X4, mRNA	Uncharacterized protein {ECO:0000313|Ensembl:ENSPSIP00000012179} OS=Pelodiscus sinensis (Chinese softshell turtle) PE=4 SV=1
TR17262_c0_g1	5539	p3	(GCT)5	1858	1872	gcaatgtcttttttatcagcgtcaactgctgccttctttgtttcagtactacttgtgaccttcatcttctcgtctgaccttgacctttcgaccggcttctcgactttgtccgtcttggcttttgctttcacatctttctccttaccagggatactcttatctccattaaccatcttggtcttgtccttggaagcagagattgatgtgtcccctttattccctgaactgtccccaccagatgatgagatgctaccagacactgaaggggttcctcctgaccctgctgctgcagctgccgcgGCTGCTGCTGCTGCTtttttcttggcatatttatcctctttgtcacggtgatggaagtcagtgtcattgacccatgtgctctttctactcttcagttga…	PREDICTED: THO complex subunit 2 [Pelodiscus sinensis]	--	Uncharacterized protein {ECO:0000313|Ensembl:ENSPSIP00000017258} OS=Pelodiscus sinensis (Chinese softshell turtle) PE=4 SV=1
TR25843_c0_g1	1409	p3	(CTG)5	1053	1067	tgaccgatccctactgtccctaccactgtgtcctgaataatgacccctgtctctcccgcgatcatctcctcttctctcataataatctctttccatctgaccagagctgctgggttgatccccaccatgccaggtatttgatctctgaaacgatggctggtgcataggactggaagccatgggctggttcataccgtatgggtttggtggaagttggttaagattaaccatgttaacaggaagatttctgtgttgatttgacatgttgtccgagttcctgtacggagcttgaacctggccCTGCTGCTGCTGCTGactgtgaatggatcctggtctactctgtaatctaagtggtctcccaaacagctgcattccatccatcatttgtattgtgtatgg…	RNA-binding protein 7 [Gallus gallus]	--	RNA-binding protein 7 {ECO:0000313|EMBL:AHH42732.1} OS=Ictalurus punctatus (Channel catfish) PE=2 SV=1
TR3832_c0_g2	3033	p2	(AG)8	42	57	gaatgaatctgtaacaaacctgggaaaatagttaaaatagaAGAGAGAGAGAGAGAGtaaaagatggagtattaacatactttcaggaatataaccgatagataccgaaccgacagtttccaagataaacgtattggagtttcctccaaaaaacttgcattcactggcatcatttatgaaaaaggtaaataagtgagttaataagatataatgcttcactgacaactccagaatgtctacaaagcaattggcagagcaaactgcaccaggcggtgataaggacataccaacaaaaaacgtcgaactgccacaatcgtattccggaaaactgattgaattttcaaaagtccaagctat	#N/A	#N/A	#N/A
TR34499_c0_g1	1318	p3	(AAC)5	1058	1072	tcaaataaacagaattttttttaaaatctcaaccataaatgcttatggataaacatgctattccaagctttatactatatatttaacgacactttgtcttcaggcaaggctggggcaaacagtttgaaaaaaaacccacaaaaaacaacatcatgataatgttgagagaataggtaatagtgtaggctctgatcagactgcatgtaagtggaggcagatctgggtccacgctgcacatataacaacaactgtgcttagcacttcaagtgtctacagtttttactattagtctactgaagtAACAACAACAACAACtggcctttctttgaaattcagccagtacacttttaccagcttctttaacagaaatttatcaaaagcaaacactgcagaatgata…	#N/A	#N/A	#N/A
TR17342_c4_g4	1999	p3	(TGT)5	1655	1669	gaatgtcccttaacaattatatcatctgttttcagtcaatgcaagtgttaaatatgcttactgaattaaaaacattaaagtcatattaatgactacagcaaagggtatttccatctagtctgtatactgtatagaacattagcgacattgagctcaactctggttccggttttatttaacatttgacatgctatctgatgaatcaaattaaatgtacaatataaaacaggaaatttctgattggcctttaagctgcttttttaagttctgaagggttaaaatgtgatgattgttttatcgTGTTGTTGTTGTTGTgttcctggtgcattaggagatcgtctaacgtctcatataatcattttttatttcgcacattttctgcaaaacaaagtaagttta…	PREDICTED: lipid phosphate phosphohydrolase 3-like isoform 2 [Oreochromis niloticus]	--	Uncharacterized protein {ECO:0000313|Ensembl:ENSONIP00000003512} OS=Oreochromis niloticus (Nile tilapia) PE=4 SV=1
TR14704_c0_g1	1896	p2	(AC)6	563	574	gtctgagccccgctgtaagacccaggtgctgtgtagtagacaggatagggtgctggataagcttggcatgctgtgccgttcagttggtcctttgttgtcatgccattagggtgtatcatgggaaccatctccatccccgaccatgctggatttccctgactagcaacacggtagttctcaactccaagattatagaagaatctcaaggtgttcacttctggaaggtctttaccagcagtgtcttgtgaagggaggcaattcatgttgacgtcatttactgcaatactctccaggtatggtACACACACACACtggtagcctggactgtttgaaggcaccatggcattgtacatatacgggttcgggatcattccttgctgcatcattgctggaggtcca…	PREDICTED: UDP-N-acetylglucosamine transferase subunit ALG13 homolog [Melopsittacus undulatus]	--	Uncharacterized protein {ECO:0000313|Ensembl:ENSLACP00000002096} (Fragment) OS=Latimeria chalumnae (West Indian ocean coelacanth) PE=4 SV=1
TR2515_c0_g1	2055	p3	(GTT)7	1004	1024	catttaatgatggtcatgtgtttgtgaacattttctaactttcctatcttcatacctgtttgatgccaaaattagagaccttagacaatgtgaaatgtttttaacttaaaaccaaactgaaaaatgtgtggattttctcatttttcacatgcctatgttacagataatttggtctgcactgagtgcaatcaagggtatgttacttctgtgttctgaagcattttctctatattgcatgtcattccagtgtgatgtattgttccattacctgtaacattctagtcgttggttgtttgcctaGTTGTTGTTGTTGTTGTTGTTgctatacatcagaacatgagggtatattgcatcctgtaaaatcattgactgtcacatgggtctaacataggtgtagtg…	#N/A	#N/A	#N/A
TR55543_c0_g1	2021	p2	(AT)9	1353	1370	tcttgctgatgtatctatcccatcacatgattgcaataatgaaatgcttacaagcattgatatttgcgtcattgaataatatgttagatatgtacatgtatctttatcgtgatagtacgccttgtgtttattttaaatgaccaatatattaaaaaaatttgactcaaaacattaggttgacatgaatgctgtaaatgaatatgaacatagataacatgtataaacatagagaactctgatttttatgaacaaatagatgaaaacatcagtttgtgatatctgttgcataaatgagttttaATATATATATATATATATacttttacaaaaagagtgtgtatttgccaaataaaatattgttgaaaagcgctttgttacattaatctgcaccgttttcag…	PREDICTED: protocadherin Fat 1 isoform X5 [Xenopus (Silurana) tropicalis]	--	Uncharacterized protein {ECO:0000313|Ensembl:ENSXETP00000037350} OS=Xenopus tropicalis (Western clawed frog) PE=4 SV=1
TR38249_c2_g1	1543	p3	(TCA)5	898	912	tcccacattccaagagtcttgcttttttctattgtttttttcctctttttttaaggatgaaatctgaatcacaaaacattaacatcaatttatattcatgacattatgttttaaaaacacaaggtattataatcctgtctgaaatacaagtacaatttgtgatcacaaaattctccccagatctttcaaagatgaaagacatcttagttttaaaaagttttcacccatcacaaaacaatcatctaaaacaaaggttatgtgttatgtatgttcagccaatgctatgcatgttcatcatcgTCATCATCATCATCAttccagctttcttgaactattgcagccacttttttctcatattctcgacgattttcacgatataattgggcagcctcattgttc…	PREDICTED: ubiquitin-conjugating enzyme E2 A-like [Astyanax mexicanus]	PREDICTED: Stegastes partitus ubiquitin-conjugating enzyme E2A (ube2a), mRNA	MGC68540 protein {ECO:0000313|EMBL:AAH59970.1} OS=Xenopus laevis (African clawed frog) PE=2 SV=1
TR29276_c0_g2	4444	p3	(TCA)7	2360	2380	ttagcgggagcacttccatcattttgctggtcagagcttccagttccggtgcccaggaacattatgtcgtagtaaaacttcgccaaggagtccacaactgcttcaggtacctcaccagggagctgcactggtctgccggtctccgagctaggcggtcccgacagtgcaatttctttaccaatgccgcttgttacgtcgccctccactttgtcagacgttgcttcctcaagctctttttgtatcatttgcgctttctctacttcgtttgtctctccagcttttgactcttctttttcacttTCATCATCATCATCATCATCAatagtctcatcaaatagcgtctttttccgagatccagacttcacagaaacaatttccacacttcttctagatctgcga…	PREDICTED: ring-infected erythrocyte surface antigen-like [Oryzias latipes]	--	Uncharacterized protein {ECO:0000313|Ensembl:ENSPFOP00000021795} OS=Poecilia formosa (Amazon molly) PE=4 SV=1
TR46987_c0_g1	1681	p3	(TCA)8	1	24	TCATCATCATCATCATCATCATCActttcaacaaattcgttctttgaaggtttaaatgttatttcatcatcttcactgctttcttccataaccaccctgtcatgagatggctttttaaactttccgggctttgacttcaatgacattttttcatctgaatctaccatgttcaacattgactgttttgttattgcattctcattttcatcatcgtcatcaatatcctcatccgattccctgccactgtcatcttctgcttccatctggttgtcatcatcagtgaatacagctcgacgtctcattctgtcacctgactgcacggtc	bms1 protein [Xenopus (Silurana) tropicalis]	PREDICTED: Meleagris gallopavo BMS1 ribosome biogenesis factor (BMS1), mRNA	Bms1 protein {ECO:0000313|EMBL:AAI60493.1} (Fragment) OS=Xenopus tropicalis (Western clawed frog) PE=2 SV=1
TR10612_c0_g1	2089	p2	(AT)6	238	249	ctgattggccgaaatggcaactggttgccatttctgccaatcagatgcttaagatttgacactggtttcaaatctcagttttatactcttcagcacaagtgatgctgtataatttcacatcccaacaaatttgcaatttttcaaaacaaacacttttcaggtctatctctaacattggtcaacaaactttcttctatttacattgtaatacaataaagcactttaaaacattggaagATATATATATATttactggcgaataaaatgacaatatctgttcaatgaatgacctttaaagataaaaccgcaaaacatacatttattgtttaacataaaaagtttagtcaaaagcttttattttcatttaaaatttcatcagaccccccaccctttcctaac…	PREDICTED: protein ERGIC-53 [Alligator mississippiensis]	--	Uncharacterized protein {ECO:0000313|Ensembl:ENSLOCP00000014682} OS=Lepisosteus oculatus (Spotted gar) PE=4 SV=1
TR46230_c1_g1	2613	p3	(AAC)5	121	135	aaaaaatcgaggtcaaaaatcagtaaaatttacgaactacgacaataataacgaacaatctcttcagatctctttatcataatgacatcataatcaagtttcactatggatcctgagaatAACAACAACAACAACaatccagggccaggtcagacccgaaccactggacgtagaggaccaaggaatcccctactgaatgttcgagatcggctgttccatgctctcttctacaggatagcacttgcctatgctcgagccttcccaaagcctattaggagagtaattgaatttgccattttgttaaaggctttgattgttctggggattctagcatacattcacattgtcttctcccattcgccaattaactgtttacaacatgtacaaaaagactggccc…	PREDICTED: membralin isoform X1 [Danio rerio]	PREDICTED: Serinus canaria transmembrane protein 259 (TMEM259), mRNA	Uncharacterized protein {ECO:0000313|Ensembl:ENSDARP00000079593} OS=Danio rerio (Zebrafish) PE=4 SV=1
TR46230_c1_g1	2613	p3	(GAT)5	1885	1899	tatcgctttaatggacaatacagtggtctggccttgtttacatcctggctatttatacagcattccatggtttactttttccaccactatgaacttccagccatcttgcaacaggctcgtgttcagcagttactgaatcgtcacggtaacgcaaacatcacagtcaccgctggtcgtattcagaatggtacaactgtatcaagtaacctgggtcaaaatggaacagaaaatggtacaaataccgaaacagcagatggtccagccattatagcaaatggtcatttgccaaataatgatgacGATGATGATGATGATcaccatattttacagaatcacgtcgatcagggtttactaaacgagatttttgagggtgttgaggatgtcagagttggtggatat…	PREDICTED: membralin isoform X1 [Danio rerio]	PREDICTED: Serinus canaria transmembrane protein 259 (TMEM259), mRNA	Uncharacterized protein {ECO:0000313|Ensembl:ENSDARP00000079593} OS=Danio rerio (Zebrafish) PE=4 SV=1
TR44873_c0_g1	1285	p3	(CCT)5	1259	1273	cagtgggccaagggggctccttttggatatgccaaagagggtttggataaattggaagaaaaaagtgacatgttagatgatgatattgcctgttactggtcgcaaaccgaatcaagaccaaaacaaaaaccatcaatgcaagtttcctggcgagcagtttcagaaccgttgcaaaaatctggagttgataagggtattccacaacatcctgatagatatccaagagatgactcaactagttttgtagcaccatcttcctctcctccccctcctcctagtggtgtttcaccttttgcaccaCCTCCTCCTCCTCCTatgggtgttcca	PREDICTED: zinc finger CCCH domain-containing protein 18 isoform X2 [Python bivittatus]	--	Uncharacterized protein {ECO:0000313|Ensembl:ENSTGUP00000004234} (Fragment) OS=Taeniopygia guttata (Zebra finch) PE=4 SV=1
TR51528_c1_g1	1876	p3	(GGA)5	757	771	tgtggtataaaggacgatagcattaattcctctcagtgctattcgtgtgaccacaggacatctgaacaaggagaggtcaaaaatccgaaaaactgtgtcacgttggaagtctgtcagcctaatgaggtgtgctatgctcagcaaagtgatactggcagtgttgatactttcttctacggatgcaaatcaagactgcaatgtgtatatttaatgaaaaaagcctatgacactcatagattatgcgatttgaatgacacaactgtgttgcaaccaggtcaagatagggaaggatggtgtactGGAGGAGGAGGAGGAcacgcgcgtgctgcaaacttatgccactcgtgctgcgctgatggcggatgtaattacggaacatgtgcagaattaaacgatcga…	PREDICTED: urokinase plasminogen activator surface receptor isoform X6 [Stegastes partitus]	--	--
TR36197_c0_g1	3047	c	(A)11tc(A)10	2939	2961	aggtgaaaactgaattattgaatcagtgtaaagcaaacgccaacagcattgtgaaaatagaaatggacacttgcagacaagacaatccacgtgaggaatgcagttctattgagatggttatgtcggcttgggcataccgaaaaccattgtacgttaaattcataacaactcagttatgaccaacattgtatgctacattaaggaggaatctactaattctttaagctttacatcctttttcccaatatttattaaaaattcagatgaactacccattaaactgttttacatccctttgttAAAAAAAAAAAtcAAAAAAAAAAtcagtggacatgaccttaaagtgattgcttttattactgattagtgtaataccatgctctcttttcctctctactt…	PREDICTED: interleukin-1 receptor-associated kinase 1 isoform X3 [Python bivittatus]	--	Interleukin-1 receptor-associated kinase 1 {ECO:0000313|EMBL:JAC95316.1} OS=Hypsiglena sp. JMG-2014 PE=4 SV=1
TR49030_c0_g1	1449	p3	(TCC)5	563	577	ttctccactggcatcggaggaggtttctcctgtatgagacagttgtcatcctcagaaccagtatcaaaggctactgttgccttctttgttttatgtttcaccttcttctttggttcagctggagatttcttcagtattgacttgggttgcattgttctaaggtatctctggtaaatgtcacctggacttgtgatttctgtgttggaagcaacaggttcactggggcatgtttccttgttatgtgaaaaatgtattagtgttccttttgaagttatctcccttgaatactctttctctgctTCCTCCTCCTCCTCCtcatcatcatcatctgagtctagctcatcagaagctgtgtacaaagattcttcctcatctgtgtcagaataatgttctgtgaca…	PREDICTED: unconventional prefoldin RPB5 interactor-like [Astyanax mexicanus]	PREDICTED: Falco peregrinus SET domain containing 1B (SETD1B), mRNA	Uncharacterized protein {ECO:0000313|Ensembl:ENSAMXP00000020530} OS=Astyanax mexicanus (Blind cave fish) PE=4 SV=1
TR21246_c0_g1	1494	p3	(TTG)5	550	564	acttgaaaacatttatagcatggtgaaatttcatccgctattatatccaatttcagaataatgtagctaaaagttccagatctggagataaaggtcatattaccaaaacagctcactgtttacacatctttattagctacactgaaccataacatgaacaacaataatttcctaccacgcattccgacttgataaaaagcaacctgacatgaaaaacagcaccataaaattggcacatttatcaacttctatcacacttgcttcaatgcattttgcaggtgtgttagaaatgtttctgttTTGTTGTTGTTGTTGttttttcagtaatatcttgcactatgtttttccacatcaaaatatattcaagaatatccacccatgggacatgctgacgtaaca…	PREDICTED: TCF3 fusion partner homolog [Latimeria chalumnae]	--	Uncharacterized protein {ECO:0000313|Ensembl:ENSLACP00000010557} OS=Latimeria chalumnae (West Indian ocean coelacanth) PE=4 SV=1
TR34242_c0_g1	1596	p3	(AGC)5	665	679	ttacaactgtagaaagtaccactgttgctccacgccagagacctaagggacagaactctactgctgctagtggattagctccacctgttcaaacttcgatagctccacggagacgtcctcaagccagtttaaataatacagattcaacagctcaacaacaagctcaagctcttgtccaacaacaacaattacaacaacaacagttgcagcagcaacaacaacagctgctattgcagcaacaacaacaacttttgcagcaacaacggatgcaacaagagcagttgagacaacaacagttagAGCAGCAGCAGCAGCaacaacagcatcagcaatatatacaacagcagcctgccacggctagcatgcctacaagtgtacctctttcacagccccaagtat…	PREDICTED: AP2-associated protein kinase 1, partial [Mesitornis unicolor]	Hucho taimen clone ZA-3 microsatellite sequence	AP2-associated protein kinase 1 {ECO:0000313|EMBL:KFQ39340.1} (Fragment) OS=Mesitornis unicolor (brown roatelo) PE=4 SV=1
TR7485_c0_g1	2063	p3	(TCT)5	2037	2051	aggcaggcatcagcagagtctttactggtgtaccgaacaaaccctattcctttagagtgttcagtttcctggttgatgacaactttggcatatttaagcttcccaaactcctggaaatagtcttctaaaccttcctctgttgtgtcaaatgacagatttctcaaaaacaatgtacaaccatcatctgtatcactttttgtattctcatttgacttaattttcttctttttattagaatacttctcatcatcttcatcatcatcattgtcatcatcttcatcatcatcatcttcaacatcaTCTTCTTCTTCTTCTtcactgtcactt	PREDICTED: RNA-binding protein 28 isoform X1 [Astyanax mexicanus]	Zebrafish DNA sequence from clone CH211-25G7 in linkage group 21, complete sequence	Uncharacterized protein {ECO:0000313|Ensembl:ENSAMXP00000000792} OS=Astyanax mexicanus (Blind cave fish) PE=4 SV=1
TR31969_c2_g1	1783	p3	(TCA)5	1719	1733	ctggtatttgttatgttttctcggctagcctctttattgttagatttgctctgacctggtgacactttttgagaatgtcttagattatatctgccatttaggttttcaaattcaccagcttcattctgatttgctggatttaagtttactccttcgtgattggctaatacattttcaatcccaccattccctgcattgtctccattattagcagcttcgccttgaccttggtgatcagcattattattgttaacatgattgacaggatcattagcaccatcattgtcatcatcatcatcgTCATCATCATCATCAtcctcttcttcatcactttcttcttctacttcttccttcttttctttaat	PREDICTED: F-box only protein 38 isoform X1 [Chlamydotis macqueenii]	TPA_asm: Oryzias latipes strain Hd-rR, complete genome assembly, chromosome 17	F-box only protein 38 {ECO:0000313|EMBL:KFO91061.1} OS=Buceros rhinoceros silvestris PE=4 SV=1
TR34473_c0_g1	2561	p3	(TCA)6	1167	1184	cgaccttgacctacatgttgactttgccatgttgtctcggtaatacgttttactgtatcaaaagtatgactgtcaacaggaattcgcttcggtttcatatcatcagaatctaataaccagtcttttagtgctttacgtgtagtgaattcagtccagtaacaaggcggcctgggtgtggttttgtactggtgtttgaaccagtcgggtgtgcctttggggggagccatggtgcgctccagggagttcatggccgcctgctctaggaacttgtacatgacattgttgctgttgtcttcatctTCATCATCATCATCATCAtcttcagactcctgaatatttctcagctctgtatcaaatgcagctttgatctgtttccatcggtcacctttgtcatacaca…	PREDICTED: poly [ADP-ribose] polymerase 14-like [Oreochromis niloticus]	TPA_asm: Oryzias latipes strain Hd-rR, complete genome assembly, chromosome 17	Uncharacterized protein {ECO:0000313|Ensembl:ENSXETP00000050545} (Fragment) OS=Xenopus tropicalis (Western clawed frog) PE=4 SV=1
TR51727_c0_g1	2639	p2	(AT)6	196	207	agattaacgtgtctttatttccaagcaaaaaaccttaacagaaacatgagattaagcctccaaaacaatcatatttggtaatttgattcaatcacaacagatctttgtacttgttacttatctctttaactctcaaaagcaaataaaaaaagaacgccaatataaaatcaatggaatggtgaacagaacatttgcATATATATATATaaacattgtccaacttgatatgtgtttctgagactatatctggaatgtacaataacgtgtatttctcgtttttaaaataaaacaacataaaaaagtttaatagtaaagcaaatcagatccaattttctaaaacacttaacatatatcaaaacaaaaaattaaataacatgagcaaaatctttttttatctga…	PREDICTED: L-threonine 3-dehydrogenase, mitochondrial-like [Esox lucius]	PREDICTED: Serinus canaria L-threonine 3-dehydrogenase, mitochondrial-like (LOC103821319), mRNA	L-threonine 3-dehydrogenase, mitochondrial {ECO:0000313|EMBL:EMC87478.1} OS=Columba livia (Rock dove) PE=4 SV=1
TR50246_c1_g1	1060	p3	(GAT)6	466	483	gatttcttactcgggaaaaggatagataagataggagaagacaaggaagaacagaaaacagagagttatggagcgttgtttgaggagaggattcagcacaacatacatatggatgctctttcaaagatgagagaagacccgctctttgccatcaggaagaaagaggaagatgctaaaagaaaattgctggagaatccagttaaaatgaagagacttcaggaagcaattgacagacagaaaggatccaagaagaagaaatcaaagaagaaactcaagaaggacaactctgacagtgacagcGATGATGATGATGATGATttgatgtctaaatatcttaatattcttaatgctaaacacaaaggaggtaaagcttctagtaagaaggacaataaacaaaag…	PREDICTED: pre-mRNA-splicing factor CWC25 homolog, partial [Phalacrocorax carbo]	--	Uncharacterized protein {ECO:0000313|Ensembl:ENSXMAP00000018148} OS=Xiphophorus maculatus (Southern platyfish) PE=4 SV=1
TR10380_c0_g1	1777	p3	(CAA)5	307	321	tgtgcgagtattcacaaaaacaaatgttgataagatatgcatgttcagtagaacaaactcagtgatgctgcacacgatgaaacagtttacaagtatatgactattatatacacatctacagtacaaggtttgcatgcctttctgagattcgacttcatagctatgctaatgtagttagctttcaacaagacataaatattatttaggcaaagtataagtaacgcatttgacaatagattcgtttcagtgacacattttatctgcaacagttacagtatatttcagttagttgatggtgatCAACAACAACAACAAcagttagttgatggttatctacagatacaccactcgaaagtcctaacagcacacttaaggtttactttcaaattcatctgactg…	#N/A	#N/A	#N/A
TR50202_c0_g1	1923	p3	(TGC)6	1879	1896	ttgcattaaagtcgatttgttgctgatgatcgatcaatgattgctgttgttgttggcatgtgacgtcacacgatgacgcctgtgggacctgtgcctgcacctgggcaccttgcatcgtctgtgacaacatattgaagaagggttgtgcgaacaggttgagattctgtacggcgtcattgtttccggatgtaggggtcactgatgtggtgaccagggttcctttatagtgaagatgttgtgggtagttcttggggaactgtgcggattctgtgctacagagactcgaccggttgttgttgtTGCTGCTGCTGCTGCTGCtaactgtgttataggttgtgttctgtg	zinc finger protein, partial [Psittinus cyanurus]	Oplegnathus punctatus early growth response 1 (EGR1) gene, partial cds	Zinc finger protein {ECO:0000313|EMBL:ACX31473.1} (Fragment) OS=Psittinus cyanurus PE=4 SV=1
TR32248_c7_g4	1033	p3	(AAG)5	246	260	gagactaatggaatgaatggaaagttctcaaagatgggcatttgttgggtattttggtacccaacaagtgcccattggtgtgcccggacagacggatggatggacgaagaccattcctatatccccgagccaatatgcggctggggataataatcatatcttttaagagaagaggtcagttgatataagaccatgaacataaacaaaactatctccctcctcccccacccacctcccaaaacaacAAGAAGAAGAAGAAGaacaaaaacaaacagcacaaaaaagcaacagaactttaggcaagtctaacgaaccaatgcagcatgttaagaggtaaaaaaaataaatataagaaaataaaaaagaacaaaatataacacaactcacataaaaaatcca…	#N/A	#N/A	#N/A
TR51395_c0_g1	1245	p3	(CAA)5	860	874	taggagcactaaactctcgtgtattgtaaaacttggaggttttgtaccatttcttattatatgcaggtacaccttgagtgaatcttcatttattcaacagactagaatttcactgacaaacatatttgtgtttcctgtttaacacttgtaacaacttaatgcacagtacaggacagaacagaacagctgatacggcatgtaagaactgtttagcaaggagttgtgagttagagaaaggcaaacaagcagtataaatacaaattgaagatgcaacagcaacaagttataaagcagactttgCAACAACAACAACAAtacttaacatgatatgcttcaacattatatagcactatatgactggaatactgcagtctgcattcatatttaagcaactaattc…	#N/A	#N/A	#N/A
TR1723_c0_g1	1907	p3	(GTT)5	1705	1719	ccgcaatttgatgtagcgagcaatgagttcatttcgtccgtacatctttccttcatcagaaaggataatttttctccgaccacatggtggatatattgctaatgcctcctgaaaactttgttcaatatctggactccaaacaccctcagcatcgtttccaagttcatcatcacataaatcatcatcattttctgactttggagcaggaggtacagaaccattgtttggcacagactgttgctgggaatccatagtactccaggacttggacatataacctggctcttgcttagggaccccGTTGTTGTTGTTGTTattattgttgttttgtatggttgatggatcaaggcttccccatggcgttgtggacatgatatggggagcaaatggtaaaatcct…	Transcriptional enhancer factor TEF-1, partial [Anas platyrhynchos]	PREDICTED: Pelodiscus sinensis TEA domain family member 1 (SV40 transcriptional enhancer factor) (TEAD1), transcript variant X3, mRNA	Transcriptional enhancer factor TEF-1 {ECO:0000313|EMBL:EOB02671.1} (Fragment) OS=Anas platyrhynchos (Mallard) PE=4 SV=1
TR48673_c0_g2	3834	p3	(TCA)5	1089	1103	taagccggatctttgtatgtagcagtttctctcgtggcaccgttttctctagaaggtgaccgactgtcccttaactccaccgtttctcccggagggggtgcagctccattaggtttcgttatgtcctttgacttttgcttctgacgtcttctccaaaggaaaactgcaagaataacagcgacaatgactaatagtatcaatatactaaaagcaacccacaatcctacttccgtctcttcttcgggttcttttgctttagctcctaaggttttatcggcactttggtttccaagtctgttgTCATCATCATCATCAtcctccttactcacatctccgtcaatgtttgtatccacctttgttgttgtttgtctactgtcatcaccagtttccacagtaact…	PREDICTED: LOW QUALITY PROTEIN: serine-rich adhesin for platelets [Xenopus (Silurana) tropicalis]	--	Uncharacterized protein {ECO:0000313|Ensembl:ENSXETP00000002971} (Fragment) OS=Xenopus tropicalis (Western clawed frog) PE=4 SV=1
TR11253_c0_g1	2389	p3	(TTG)5	969	983	tcggtaacctctttgtcaattaagaaaatgtcaatttaaacatgaacttttctgtgaatattgactgaaaaaaataatactatagcatgccctagtcagtgttatattacaattgtaagaaaacaattcaaatttcaataaaaaaagtagacaaacctataaaatgatctgtttcaatgaaaaaggaatatatgtctttttttctatttctagaaacaattataactttaaatacatgctagtttcttcaatttattgttgtatgccagctcccaacataaaatggtcttaatgaattttTTGTTGTTGTTGTTGtttttaagcaatttgatacatgttcatcaacattaaagtcaggggtcaatgtctatttttatcttcagcctttacttccggtgc…	#N/A	#N/A	#N/A
TR45999_c0_g1	3258	p3	(TTG)5	2274	2288	atgttcagaaacgtgtggtgcaagcaggccaaagaaaccactgtgtgttgatagcttttccaagctcattagagaattttgatgaccctggaagaaatattcagcagcgtcctttgaaaaatcttgtgtcatatttgaagcagaaagaagctgcgggagtcatcagtttgccgccatatcctacgaaagataaagacaatgtagggctgttgcatgcatttcccccgtgtcagtttggatacgagtaccttgttcagcgtgcacccaagctgccagcagattgtatgcttgatgattaccTTGTTGTTGTTGTTGttcgtggtgcagcttaaaaaatcattaaaatatgtttttcattttatatagcaaaatcatgttaaattgttgacttgctgggaa…	PREDICTED: putative RNA-binding protein 15 [Latimeria chalumnae]	PREDICTED: Callorhinchus milii RNA binding motif protein 15B (rbm15b), mRNA	Uncharacterized protein {ECO:0000313|Ensembl:ENSLACP00000020910} OS=Latimeria chalumnae (West Indian ocean coelacanth) PE=4 SV=1
TR13116_c0_g1	2355	p3	(CAA)5	701	715	ttatgccgaaccagaactccaggttagacgtttatacggtggagaccggaagtaaccgaagtacgctggtttatgagcacgtgtatcaacctacgtcacagtggcaggaagtgaaagttttgctaaatacaagcaatgcttttaggattgagtttagatcggctaaagaaaacaactttgggtacgttgggatagatcatgttcaaatcctaatagagaagatctttacaacaactcctgcaacatttttaaccacaacaacaacgtttcgtccaatcacaaccccttctacaaccgtgcCAACAACAACAACAActgaacttacaaccgaacttacaacaacaacaataacaacaacagggtctacaactacaatgtcaacaacgccaatgacaacca…	PREDICTED: integumentary mucin C.1-like [Esox lucius]	--	Uncharacterized protein {ECO:0000313|Ensembl:ENSAMXP00000003966} OS=Astyanax mexicanus (Blind cave fish) PE=4 SV=1
TR32836_c5_g2	2001	p3	(TCC)7	1337	1357	gtagtaggcgagtcaaacggatcaccgacatgaaatttgttatgcacgttgtctttatgttcgtacatatcaaagcttggtattttgtcaaattcggtctccgtagatacttcgttagtcgtagatatatcagcaaactctccataaaattgtttatgattgttgtcttgcccccatttcccgtaatctattttcgagcctttatcatcattaccaccaataggtccgttctttggctgcattggaactgtgacatcaattgatctggtaggatcttgcagcaagtcttcatcataatcaTCCTCCTCCTCCTCCTCCTCCtcatcttcatcatccatctcaaagtcactgtcatcttcatcatcttcgtctgcttcatcatccaaaaactctctagtc…	PREDICTED: LOW QUALITY PROTEIN: uncharacterized protein DDB_G0271670-like, partial [Tauraco erythrolophus]	PREDICTED: Cariama cristata high mobility group box 1 (HMGB1), mRNA	Uncharacterized protein {ECO:0000313|Ensembl:ENSPMAP00000010254} OS=Petromyzon marinus (Sea lamprey) PE=4 SV=1
TR22579_c0_g1	1016	p3	(CAA)7	26	46	cttttatcaacaaatacaaggtaccCAACAACAACAACAACAACAAaatggccactttgaatattttgcgcagattatcagtattaaaacaaacaaatgcaatagtttgtggagcgagtgtgacctccagagtaactagtgtgtgtccatcctgcagacttttatcaacaaatacaacatacatttacagaagagacagaagcagacagatactatccaatgttaggtcacatgtcatacaaaatgtgcggaatatgtttatacagacacaggatacaccaaatccaaactgcctcaagtttatcccgggagtgacagttctcgagtctggtactaaagatttccc	PREDICTED: NFU1 iron-sulfur cluster scaffold homolog, mitochondrial [Astyanax mexicanus]	PREDICTED: Chrysemys picta bellii NFU1 iron-sulfur cluster scaffold homolog (S. cerevisiae) (NFU1), transcript variant X1, mRNA	Uncharacterized protein {ECO:0000313|Ensembl:ENSAMXP00000003211} OS=Astyanax mexicanus (Blind cave fish) PE=4 SV=1
TR44808_c2_g1	2064	p2	(TA)13	2038	2063	acatgttagaaacttgagctttctgcttatctgtttgattcttttgttgtgtaaatatctgtaaagttcattttcactgatcaaagacagggcctaagatcataaactaaaaatggggaactgtctcaaatctgaagcatctgattggatgaaattgagacttgagatctgagtctggtctccatttttgattataatgattttgggcccagaagttcacattgtgctagatattctttaagctgaatagtgacataaattatgaagattattagtttattcaagctccccgaacaaaatTATATATATATATATATATATATATAt	PREDICTED: 3-methyl-2-oxobutanoate dehydrogenase [lipoamide] kinase-like [Alligator mississippiensis]	Cyprinus carpio genome assembly common carp genome ,scaffold LG38	Uncharacterized protein {ECO:0000313|Ensembl:ENSACAP00000006857} OS=Anolis carolinensis (Green anole) PE=4 SV=2
TR31506_c0_g1	2979	p3	(CAA)6	130	147	gtcagatcctgatagcgtagcggttttcaggatatgattttaatcagattggttcctaattaacctcatgttgacacttcgagtgtttcttgcagataattccaatggatctgacgtcatcgccgatgtCAACAACAACAACAACAAcgatgacggaatgtgctctacggacgcagatggcgcaacgaggtcgaggaagcgtaaaagaccgatcccagcgggcaagcccccatacagttacatcgccctgatcagtatggctatagctaatgccccggatagacgcaccacactgaacgagatctataagttcattacagatcggtttccgtacttcgcaaaccacagcaaccagaagggctggcgaggctccatacgtcacaacctagcgctcaacga…	Forkhead box protein E4, partial [Ophiophagus hannah]	--	Uncharacterized protein {ECO:0000313|Ensembl:ENSLACP00000013926} OS=Latimeria chalumnae (West Indian ocean coelacanth) PE=4 SV=1
TR54521_c0_g1	1519	p2	(AT)6	1414	1425	cggaaagactggttttcttagagaaggaaaacctgatcagtttgctgaagctatggaaagaatagtagttgatccaaagttagccaagaagctcggggaagttggtagaaaacatgtagagactaacttttctttcaaagcgtttactgagaaactgaacacagttatcacagatcttttgaaaacttagtcagcaaacatttatttatacatgtaaagagttattttttttattgaagggccttatggctattgatggttgccagttcagtaaacattgttatggttaaccctttactcATATATATATATacacatttcatcatatgggccttctgatcaggatctacactgtgtgcttttagaataattaggctatttattaccaagaagcaactt…	PREDICTED: alpha-1,3/1,6-mannosyltransferase ALG2-like [Lepisosteus oculatus]	--	Uncharacterized protein {ECO:0000313|Ensembl:ENSLOCP00000006409} OS=Lepisosteus oculatus (Spotted gar) PE=4 SV=1
TR7528_c0_g2	2717	p3	(CTT)5	1841	1855	ttgttgctgattattatttcttccattgcagtttttacgttttggtgtggtctgtacaatatctgcattagaaggtcccatacaagtcttattaggccccatacaagttttattaggccctgaaccagcattactgagatcttgatcagcagaccaaacccttaaaacacaagtctgttccccatcactcgagtatgtcctgctctcattttcacccacatctattcggaattgtttttcacgcctttcagagttatctacattgtctgcttcactttgttgctgctgctgctggttctgCTTCTTCTTCTTCTTatatctgtttttatttctatttttagatttaccctttgtttgaccatctggttgattttgctgcttttcaaaattctctctcaa…	PREDICTED: ribonuclease ZC3H12A [Latimeria chalumnae]	--	Uncharacterized protein {ECO:0000313|Ensembl:ENSLACP00000019750} (Fragment) OS=Latimeria chalumnae (West Indian ocean coelacanth) PE=4 SV=1
TR4812_c0_g1	1405	c	(T)10ggtaggagctgtttacaggccactttcctgtcaa(T)10	1252	1305	gattctggaatctgctctggtcgtacttcagccattcccaccgagacggagagtttgacggacataagggatcctgcggtggctgaaggggaagactcctcctcttcgtttgaggagataaatatagaaagtgttcttcaaaaggataaggaggaataaatgcttcatactctataagccgtaggtctaattctacagacaattctggatttaagttttgtttgcaaatgtaaaacctgttatttgattgaaaatagctgctaacacagtatgtcataccataacgaaatgcagaggttcTTTTTTTTTTggtaggagctgtttacaggccactttcctgtcaaTTTTTTTTTTaaattatgcagttttcccctaaaatgttacttaacattagttttt…	PREDICTED: testis-expressed sequence 264 protein-like [Danio rerio]	--	Uncharacterized protein {ECO:0000313|Ensembl:ENSTNIP00000017648} OS=Tetraodon nigroviridis (Spotted green pufferfish) PE=4 SV=1
TR40411_c0_g1	3492	p3	(TGT)5	128	142	aggaatggtaatctgatgaccttgaaacgacgttggttgctgtgactgtgcagtcatctgagaatgtgcaacctgctgttgctgctgctgttgttgctggagggaagcagcagacacgtgtttctgcTGTTGTTGTTGTTGTtgggcagcaaattgctgctgctgaatctgctgttctaactggttctgtgctgcctgattctgcaaagcttgctgctgaagttgctgcaatttctgctgctgcgcctgtaactgctgatgctgcaactgctgcagttttaaacgtagctgagattcttccaactgcgactgtaacttctctatcttctcttgttgctgtttcagcaactcttcctgtgatacctggtaacttgacgatgacgagtgctgcagctgttg…	PREDICTED: MKL/myocardin-like protein 1-like isoform X4 [Haplochromis burtoni]	--	Uncharacterized protein {ECO:0000313|Ensembl:ENSAMXP00000007878} OS=Astyanax mexicanus (Blind cave fish) PE=4 SV=1
TR3244_c1_g1	7632	p3	(CAA)5	1394	1408	ggttgtcagttccatacgtgtgcgatatcccacaattccctggtattcagcaagaacgaacttgactttgccataaacgatccaaggtttcccgactcaggaaaagtggagtttgtttttggaaacaattcagaaggcctagtacaagtggcagatttcaagtcggatgttacggtgcccgttgacgactccactgaagctttaaccagatgggactcctatgagaactttggcagaccgggagacagtgaaaaaactgatgtgaatgctaatggtctacaaagttctcactacatacagCAACAACAACAACAAacccaacaacacggagtcgacagttttcgagtaacgcaactggatcattcacagggtccagttgacgggagtttgtacgcacag…	PREDICTED: tensin-1-like isoform X2 [Maylandia zebra]	PREDICTED: Oreochromis niloticus tensin-like (LOC100701033), mRNA	Uncharacterized protein {ECO:0000313|Ensembl:ENSONIP00000009056} OS=Oreochromis niloticus (Nile tilapia) PE=4 SV=1
TR48614_c2_g2	2185	p2	(AT)6	1923	1934	gggaatggggcccatattcggccctaaaaatggctaaatgagtgccctgagatcatttttatatgaattaaagaattttgttattaaaccttgatagcaaacagaacagctatttcagaatgtaccggtatgcttagtcattaagccacacattctgggaccaactcattaaacatgtttgccagagactttttgtgacaacagtttcgaaatcttgtgttaaaatactgtgttgatcagttgtggtggaatcaacttttatttccacttttttgagagtttgctttaaaactgaattccATATATATATATgattgcactgtgttcttaaaattttatttattatatttccatataaatatcattccaacagattttaaatcaattatccatttctca…	PREDICTED: Parkinson disease 7 domain-containing protein 1-like [Xiphophorus maculatus]	--	Uncharacterized protein {ECO:0000313|Ensembl:ENSPMAP00000007848} (Fragment) OS=Petromyzon marinus (Sea lamprey) PE=4 SV=1
TR48632_c1_g1	4971	p3	(GGA)5	2824	2838	cagtctactggggccagatagggtacctatggctgaaaagttcattgctgcccttgagtgcttcaatcagcctgaccaagaatttaaggatgcatttgatgagatgataaaacatttaaagaagaaacagaaggataaagcattagagatctataacaccctgtaccgtcgtctcctggactacaagaagagagaggaggaggaagccaaagctagaaaacctaagaagtctcagagctcccagggttctcagcggtcccagagatcagcaaaaggtgacagtggtgagggtactgagctGGAGGAGGAGGAGGAtgaaagcattgtaatgtgtgatacccttctggacatcggcagctatgctaggaagtttgctgatgaattcaaatcgaaatttga…	PREDICTED: DNA-dependent protein kinase catalytic subunit [Callorhinchus milii]	PREDICTED: Callorhinchus milii protein kinase, DNA-activated, catalytic polypeptide (prkdc), mRNA	DNA-dependent protein kinase catalytic subunit {ECO:0000313|EMBL:AFO93781.1} (Fragment) OS=Callorhynchus milii (Elephant fish) PE=2 SV=1
TR32847_c2_g1	5776	p3	(GAT)7	1265	1285	tacaaccagaaagaactggagaatggctatgaagaagatggtagaccacagcgcaagagaaagaaacttgaagaagatgatggtcaagatggagatgatgaattcacagacatttacagtcgtgtgaaaaggcagcgtaagactgtaaagcgtgatatgtatggtatgccgatagagacagataatgaagaagctgatgataatggtgatgaagatgaggaggatgaagatagtgatggtgatgatgatgaaaatgatgatgaagagaacagtgatgatgataatgaagaagaggaagaaGATGATGATGATGATGATGATgagaaaaaagaagaaaagaaaacaagacggtcatacaacctccgagaaaacaaaccaaggactcaacactatattgct…	PREDICTED: ATPase family AAA domain-containing protein 2-like isoform X2 [Haplochromis burtoni]	PREDICTED: Falco cherrug ATPase family, AAA domain containing 2 (ATAD2), mRNA	Uncharacterized protein {ECO:0000313|Ensembl:ENSONIP00000009182} OS=Oreochromis niloticus (Nile tilapia) PE=3 SV=1
TR32847_c2_g1	5776	p3	(TGA)5	4324	4338	aaagcgactacaaatgtctcctacgaaggaaacggaaaacaacttaacacctcagggacagcttaaaaaacatactcatgtatccaaaagcagctcaggggataaaactgctcaaaattcaaactcagggagtaaaccagactcaagctcgaaggcggagttgagctctaagtcctcctccagcaagaaaccagcaaaaaaggacatctggggaaggaagagttatagttccaggaggaggagacggttaatgaagagaaagcgagaagatagtgagggggaggatttcactgagattgtTGATGATGATGATGAtggtgatgatgaccacaatgccagtattgacaatgatgctgatgaacaagagggacaagaagagatggaggatgtagaagcagt…	PREDICTED: ATPase family AAA domain-containing protein 2-like isoform X2 [Haplochromis burtoni]	PREDICTED: Falco cherrug ATPase family, AAA domain containing 2 (ATAD2), mRNA	Uncharacterized protein {ECO:0000313|Ensembl:ENSONIP00000009182} OS=Oreochromis niloticus (Nile tilapia) PE=3 SV=1
TR10219_c0_g1	1123	p3	(TAA)6	1011	1028	cgtgtctgtttatttacactggagacacgctgcctgtgggtatgcccaatggtacattcatgtttagacttagatctgagcacgtcaatgatatttaggcgagtgagtatatattaggctcatttcgacgcccaagaagacagttcagtaccacggatgagcacctactgtatcctcgtcttgaaacccacacgtgtcacgaagccaaaacatataactaaaattgtcacgagaccaggaacagtaatgcaatagtgaatggttaaatgcaacaagagtttttttccttgcatttctgttTAATAATAATAATAATAAtattgtccaacaacattgacctggcactcttgcatttgaccccatattcgttaaatttcgtaaacgttacgatctacgttg…	#N/A	#N/A	#N/A
TR33463_c0_g1	1042	p3	(GAT)5	769	783	aaagcgttcaaacaggggcgttgtcggtacggtaaacattgtcagtactcacatgacttagatgcaaatttatcagcaagatataaacaagaagaaactgttgaagaaagctcgcaagggacaagtgagtctgcaaatcagtcaaggcttcctaaacaccttcggctaccacccccacctcagcaaaaagggtttatgggaactgttaacacacttcattccggaccaaaacatgtaacaactccccagcagagagctcattatattcaacagcagcatcacatgcaagcaggaaatgacGATGATGATGATGATaagtttaatgttggagataaaaggaaaaagagagtgggtttgtctcaaacattagtgccaccaaagagggcaatgagttcatta…	unnamed protein product [Oncorhynchus mykiss]	--	Uncharacterized protein {ECO:0000313|Ensembl:ENSAMXP00000000750} (Fragment) OS=Astyanax mexicanus (Blind cave fish) PE=4 SV=1
TR17330_c0_g1	6524	p3	(GAT)5	757	771	gccgccatcagtgatcagccccgagatgttttgtgtggtgcagcggacgaagttctggcagtgttgaagaatgacaagatgagagaaaaggagaaaaaaaaggaagtagaaggtcttctgggacccctggcggatgagaggttcgcactgctcgtcaaccttggcaagaagatcacagactgggtacaggaagagaagatgcagatagaggaaaatatagatgagacatatggtgttaacgtacagattgaagagtctgatgatgatgacgatgctgatgtgtatggagaagtgagggagGATGATGATGATGATgaagagtctggcggagaggaagcagatctcaacgtcactctctctgcgggaaatcttggtggaggtgatcaaagtttgaatgtc…	PREDICTED: U5 small nuclear ribonucleoprotein 200 kDa helicase [Callorhinchus milii]	PREDICTED: Merops nubicus U5 small nuclear ribonucleoprotein 200 kDa helicase-like (LOC103768277), partial mRNA	U5 small nuclear ribonucleoprotein 200 kDa helicase {ECO:0000313|EMBL:AFO93708.1} OS=Callorhynchus milii (Elephant fish) PE=2 SV=1
TR48144_c0_g1	1204	c	(TGA)5agat(GAG)5	35	68	cagaagatgatagtgaggaggaacaccatgacagTGATGATGATGATGAagatGAGGAGGAGGAGGAGgatgaagaggtgaccgatagtgatgaaaaccaggaagaaactcagattgaggtaagagaggacgtaaacattgatgagattcctataaagccaggcatagaaggtgggaagacgtttgaacaactactagaggaacagctgagggccgaggaagaaaggctgaagcaagcagaggccaaccaagactcacctagtcagccaaagcgtagttttctcaagaaaggcgaggggatttccaggtttcagtccaaaccaggccagaaaccaataagaaacaagaagtctaagacctctgcagtc	PREDICTED: centromere protein J-like [Xiphophorus maculatus]	Gasterosteus aculeatus clone CFW268-F01 mRNA sequence	Uncharacterized protein {ECO:0000313|Ensembl:ENSPFOP00000025004} OS=Poecilia formosa (Amazon molly) PE=4 SV=1
TR48144_c0_g1	1204	p3	(GAT)5	1122	1136	gacaggatccttagtggtgccttacccaagagtcaagaaatgggcaggccaacaagtccacgagcagctctcatcaagaaactcgagctggagaaacaagccaagcacagagaacagctagagcaacaggcaaatgttcgtaaaatagctccgtctcatgcaaatgagccgatcaaattgaaaactggtgattctgggaaagtttctaaacagaaaagtgtttctcaaagtagtggggaaaaaactgcatcacaacaaaaaatattgcgtaaagaaagtaggaaaattgctagtcatgaaGATGATGATGATGATgaatatgaatctgtcagtgatagtagtgatgattctagcagtgatgctgatgaggatgaggatgacag	PREDICTED: centromere protein J-like [Xiphophorus maculatus]	Gasterosteus aculeatus clone CFW268-F01 mRNA sequence	Uncharacterized protein {ECO:0000313|Ensembl:ENSPFOP00000025004} OS=Poecilia formosa (Amazon molly) PE=4 SV=1
TR29840_c4_g1	5165	p3	(GAG)5	202	216	taacaacacgcatgcgtattcgttccattgcaggaatggtggaaaatgagttctaaaataccaagaaaagcccaagcaatccaggcgcggaaaaagcgttcaaaggcaaagacgcgctttaaaacagacgataaaaagagaggctcgtctgattcgcaccactctcagcaccacagcaagcatgatccagtgtatgatgaaGAGGAGGAGGAGGAGgaaatcctaggctctgatgatgatgaacaggaagatcccaaagattattgtaaaggaggttatcacccagtgaagattggggatctgttcaataacagataccatgttgtgaggaaacttggatggggacatttctccactgtttggctatgctgggatttacaggcaaaaattgaggcaaag…	PREDICTED: SRSF protein kinase 1 isoform X2 [Aquila chrysaetos canadensis]	PREDICTED: Callorhinchus milii SRSF protein kinase 2-like (LOC103179151), mRNA	Uncharacterized protein {ECO:0000313|Ensembl:ENSGALP00000001306} OS=Gallus gallus (Chicken) PE=3 SV=2
TR32810_c0_g1	2495	p2	(AT)7	376	389	ttgctgaacaagaaacctgacatgagcaacagattgaacttgtaagcttttgactactacacagatctgctctgacattaatcctttacttctttagatatggcttctatcatatggctgaacagtgctaatccagatctgccagcacatctgtgccgaattatcaaaatcagaattgtttttgatttattcagttatttattaccatgaagtgaccagagtagatggcagatcagatagcacggatgagcaggcttatctggatatacactggttgcaaaccctgtcaatcctctatacATATATATATATATggtgtaaagggttaaccgtgaacatctcaaaaacatatacagtttatgctttttctcataaaaataaaattgcaatttttggttt…	PREDICTED: programmed cell death protein 7 [Astyanax mexicanus]	--	Uncharacterized protein {ECO:0000313|Ensembl:ENSAMXP00000002971} OS=Astyanax mexicanus (Blind cave fish) PE=4 SV=1
TR1492_c0_g1	2882	p2	(AT)6	771	782	ctgtaaaactcacgattaccatggtataatggtttaattatttaaaagaataacattgtataggctaataaattattttgttgagtagagtagatttgtctttagccggttatttctttcaacagaaacaaacatttgtgtacagaatgatttttgaacataatcttaaatatatttcgtttaaaaaataaattatatatcgtctaaggtgatcaattattctgatcaaattgaactaaatatgagattaaaatggtttaggtacacatacattacattcaatatttgaatctggctttcATATATATATATaattctaaaactgttgtcttcaggtatccaccgttaccatttagaattaaaagaaccccacatttactttgtgcatatgataaactt…	PREDICTED: protein NDNF [Callorhinchus milii]	--	Protein NDNF {ECO:0000313|EMBL:AFO98812.1} OS=Callorhynchus milii (Elephant fish) PE=2 SV=1
TR57388_c2_g4	5531	p2	(AC)6	1818	1829	aactttgcagatttgcaggctgatttagatctacatgtagaaaatgggatgtgacaatatttaatagtatgcatacagctatactgctaattaaattaagtaatacatatattttaacattatgttcttcctgattattaacttttttttacttcccctaaaataccagcaaagaatcaagtagtaggaagaaaacaagtacagcatattgcaagactgtgctacaatgcaagtttattgaccttttaagtcaaaccagaaaccctcctatactggcttatatacaaccctagaattaaaACACACACACACattgaaatcattattaacaaaaaaataaaacttcaaataaatacatgtacatgtactaaatgatcttgattgaaaaggtgatttgag…	PREDICTED: EH domain-containing protein 3 [Poecilia reticulata]	PREDICTED: Chrysemys picta bellii EH-domain containing 3 (EHD3), transcript variant X2, mRNA	Uncharacterized protein {ECO:0000313|Ensembl:ENSPFOP00000010940} OS=Poecilia formosa (Amazon molly) PE=4 SV=2
TR41233_c0_g1	1914	p3	(ACA)5	1124	1138	ggtgcatcccacccgccactgtcagtctgtacctgaggaacaacagttcggttacacagagccagttattgcacgatggttttggcttattgttggctataaaaacctgataatgtgtgtttctttagagactggaggctgcaccaaaattgctgatggtgtgtctcctcctgaccccttcctcattgaccaggctaaggctgtgttaatgcagttgtatggccagaatattgctgcacagtgccagaattgtataacagatcctcctgcaccttttgtgactaccccagaactcctaacACAACAACAACAACAaggtcatgacctcatctcaagggcattgaagaagctacctcataaagaggctagtctatttagcgttgcaaatggtgttgcaga…	PREDICTED: protein inturned [Apaloderma vittatum]	--	Protein inturned {ECO:0000313|EMBL:KFP91401.1} (Fragment) OS=Apaloderma vittatum (Bar-tailed trogon) PE=4 SV=1
TR29791_c0_g3	1010	p3	(TGT)6	952	969	caataccactaatgtattcttcttgcatgaaaagtgtcaagtgacattgatgaggttatgcatcatgacaagtgtcaagtggcatagaagatgagattctgggtgttgccagaagcttggtctcttgggatgttaccatgacaatggcagcactacatcacagacagacactaatttctgcctgtgtatcaaaccatgaccatctgatgatgaaacataccggtaccttgaatggaataacaaggtcattttccctgtaaatgttgttggcattgttgttaatactgttgttgttgttgcTGTTGTTGTTGTTGTTGTtttcaatctgatcataacaaaattgcaatttcagttaacac	--	PREDICTED: Danio rerio basement membrane-specific heparan sulfate proteoglycan core protein-like (LOC100534707), mRNA	Uncharacterized protein {ECO:0000313|Ensembl:ENSPSIP00000000064} OS=Pelodiscus sinensis (Chinese softshell turtle) PE=4 SV=1
TR28949_c0_g3	2318	p3	(CAA)9	2253	2279	agtggatcacacagtatgcgtgggttgtcaaggtcagacacaatggagttggaatctgtgacatcaacgcccactccaacaatgaatgcagcagacaatgggtctcggccatatgtgagctcggggaaaggcagaaagaagcttccatgggaaggagagtcaaatggacagaatgatggccctccaaagcagccccgtcagacgtggtcaaacagcgaggatgccaatgatatctacaacaagaaaccgatcatcaagagacgcacacagccagttgttgcacagtcaccaccagaggatCAACAACAACAACAACAACAACAACAAgaatcttcctacaaacagattcatttgtcaaagttgaga	PREDICTED: protein FAM179B [Callorhinchus milii]	Zebrafish DNA sequence from clone DKEY-163H16 in linkage group 4, complete sequence	Uncharacterized protein {ECO:0000313|Ensembl:ENSLACP00000001387} OS=Latimeria chalumnae (West Indian ocean coelacanth) PE=4 SV=1
TR26662_c3_g1	3030	p3	(GAA)5	147	161	gataaaatgacagagaagcgtctgaagagaaagatgaagatgaaattgaagaaggagaagatgctcaaagaggcaaaactgacagaacaagctcaacaaaaagtgcccccacctatcaagcaagaagtagcatcaccaaatcaaatGAAGAAGAAGAAGAAaaagaaaagaaaaaataaaggtcaaatagaagacaaatcaggcactccgtcacttcataagggggttcaaggaaagtcacctatgtcattgggaaaggatttgcagaaaagaaaactagatgaccagaaagaaatcaacagcaagaaaataaagcttcagcaaggagaaagctcagatgaagacagttcagaagaaagtgacttggaaaccagtccacaaaaccagagagacaataaa…	unnamed protein product [Oncorhynchus mykiss]	PREDICTED: Taeniopygia guttata DEAD (Asp-Glu-Ala-Asp) box polypeptide 18 (DDX18), mRNA	Oncorhynchus mykiss genomic scaffold, scaffold_20 {ECO:0000313|EMBL:CDQ57281.1} OS=Oncorhynchus mykiss (Rainbow trout) PE=3 SV=1
TR33423_c0_g1	1707	p3	(TCA)5	125	139	ggaatgttaaatggcgaaatatgtaagccaaagagaggtattgtccaacaaaattgacctggcacctcattaaatttcgtaaaggtcataggaaaaacactggcatgttatgttatcttcacccTCATCATCATCATCAtctatgcagttaccaaggcaaaacaaattatctatgtaaactattttccagtttctgcatcattcctgatctcgattttatacaatgcagtgaaagagactaatgctgataatattcgggtaagaaccggtccgaaattttaaaaacacagacaacaattattacagaagcgccgccggaagttgacttcggcaaaatttcatagtcattgtactttttttattgaaattctttctctaccaacgccaataatgcctccg…	PREDICTED: 26S proteasome non-ATPase regulatory subunit 7-like [Latimeria chalumnae]	PREDICTED: Struthio camelus australis proteasome (prosome, macropain) 26S subunit, non-ATPase, 7 (PSMD7), mRNA	Uncharacterized protein {ECO:0000313|Ensembl:ENSLACP00000012286} OS=Latimeria chalumnae (West Indian ocean coelacanth) PE=4 SV=1
TR12465_c0_g1	1113	p3	(TGT)5	1032	1046	tacccaccacaggaattaccacctgtgcaaaatcatcattcttcttattgaaatcatctcctaggtcaaagcgaagttgccgaataccttgtccaagtaagcggtctacatgaggatattcttttaagacacgaagtggctctttgacaaactctgaatgtctgaatttatactgatatctttctgtaatggcaaagtacaagccaacacctccaaaccatagtccaaccgctgaacctgctagcacgttcaggcttggcatatcagcaagttcatttctcatatggagggtacacctggTGTTGTTGTTGTTGTcttcctgtgccttttcttttgctttcttctctctgtagccttgcagtcttttgttagccctggcctg	--	--	--
TR46218_c1_g1	5890	p3	(TCC)5	4391	4405	tccgtgtcatcaactgtttgatcatcttcttcttcattatcttctcttttgcttgcactctcatcttttctttcttcagattcttcatgctcagcattgttcacttctttatcttccttactgtctatgcttcctgtatcaccaccagcattttcttccttgctttcagcagcatcagtttggtcttcttcttttgattctgtttcttcatcatctacagtagtctcagcttctgtttcttctttcttttcattctcatctttaccttgtgtttcctcaccttcttgattctcctccactTCCTCCTCCTCCTCCtcattgctttcctcatcatcatcatcttcttcctgctgctgttcctccccatctccagagtccttagttttcttaccactctct…	PREDICTED: LOW QUALITY PROTEIN: lipopolysaccharide-responsive and beige-like anchor protein [Manacus vitellinus]	PREDICTED: Latimeria chalumnae neurobeachin (NBEA), transcript variant X4, mRNA	Uncharacterized protein {ECO:0000313|Ensembl:ENSFALP00000005614} OS=Ficedula albicollis (Collared flycatcher) PE=4 SV=1
TR55499_c0_g1	2030	p3	(ACA)5	20	34	cgaagacgtgacgacggcgACAACAACAACAACAaaacaatatttcttcatttaataattcttctcgctgcaaataaggaagatatacgtttgataatcagaacatagacttgctgagaacagccatgacattctgagatcagacactcccaaatactgtgtcgttggaaagtacatttggggatgagtagtaaggaccaatcaccagcagtgggtggggctggaaaggcagggcctggacaacactggtttgtcacagaaatacaacagatgatgcatggcctcggagactgcagacgaccattacaagagtcagccatattggtggaggata	PREDICTED: transcription initiation protein SPT3 homolog [Alligator sinensis]	--	Uncharacterized protein {ECO:0000313|Ensembl:ENSLOCP00000019468} OS=Lepisosteus oculatus (Spotted gar) PE=4 SV=1
TR2169_c0_g1	3038	p3	(TCT)5	1044	1058	ttctatttccaccttccaagcacggacttggctcatgagccaggttttcctcaatttccagatagccgcctacagcccccacagcacctacataatgctccttctctaactcggccattttgcgcttttcgttgagttcttcatgtaacctaagttgatcctcgactctgtgaacatttctatccttgctgctacaaatactgtttctatgtctagtcagatgttctgtaggaagtctatacaacgagtcaaagtcttgcccatcatcattactgttacctcgattgtttctacgattccTCTTCTTCTTCTTCTcttttctaccattcttaaatctctcagttaaacctaaatgcctcatcctctctttctccaaacgtatgaagtctattaagtcag…	PREDICTED: mitogen-activated protein kinase 6 [Esox lucius]	PREDICTED: Picoides pubescens mitogen-activated protein kinase 4 (MAPK4), partial mRNA	Uncharacterized protein {ECO:0000313|Ensembl:ENSTRUP00000043574} OS=Takifugu rubripes (Japanese pufferfish) PE=4 SV=1
TR24910_c0_g1	1528	p3	(AGT)5	866	880	aaattcaattaaaattaaggaaaaaacatggaaaaatactgctcgttaacacaccagtccacgatatagtaaaatgagttctgtttaaaatatgacaattgtaacaaaaacatatttttattaacataaagcacagttataagataaagaggtataacactaaggaacagctacacctaatcaatcataaaattctattaacaaaaaaagaaaaagcatataaatctactcagattaatattgctcgttaatttgttttcgagacactgacgctatattttttatattggtagtaaaagcAGTAGTAGTAGTAGTttattatgcaataagccacaatgattcatgaacatatataaccaaggcaacgaaaacgaaaaacaacaatataaataaattcgt…	#N/A	#N/A	#N/A
TR37647_c0_g1	1372	p3	(TTG)5	1290	1304	ttggaatacatacagttagagttatctccccttgtatccagcctgagaaatattctattcaattcactctatttattcctgttatgtgcagccgtgatggttgtctgccaaattttagcacgagtgattttcacctatttgaaaaattcccgccatgtgaaactgacaaaaatttaccagttgcctagcagatgtgaatttccggacgaccagcaggctttgcaaaaagacaatcagtccgtgatagcggaaagttgtgagagtggagtatatgatatgaccaattagtataaattgttcTTGTTGTTGTTGTTGtttgttgactatataaagtttagtatcagaataagtgttcacttccatacactgttatatcatttaag	#N/A	#N/A	#N/A
TR26463_c0_g1	1260	p2	(AG)15	1230	1259	atatgcacaccgtcttataaaaatagaattgcgctttaatgtgtaaataatgaggttaagctcaacccgagacaaggcagtgtgagcattaatatgcacttcaatttttgcccatgaaaaggctaatttaaaccgagcctgcaattttgcatatttaccgtgtttgatggcttagtcaaattcaaaatatttctataaacccgcaagtcatatcgttcatgttgatttaaattttacagaaaggtgaaatatgcatatcaggagtcgccaaattcagaacaaaaacagcctccccacacaAGAGAGAGAGAGAGAGAGAGAGAGAGAGAGa	--	Cyprinus carpio genome assembly common carp genome ,scaffold 000000701	--
TR21712_c0_g1	1531	c	(G)11cgtgcgccgggtgcg(C)10	46	81	tttattgtttccataccaaagaacatgtaagctccgggaattttaGGGGGGGGGGGcgtgcgccgggtgcgCCCCCCCCCCtggatccgctagtgccaacacagataaaaagtagagaggaggaaagagaatggcttatacaatgatcaataaaaaaaacaacaccacaaatatttaaagaatggtcgatggcgaaacaatgccactgaggtttaaactaggttcttgtgtgaaccaacaacacactagcccccaacaatttcccgtataaacaaacaattacaagtaacttttgtctaggtgaaataattccaacccacccatccactcgacaatgttgcatgcaaaagaacgcaaacatataaaacatacgaatctatc	#N/A	#N/A	#N/A
TR23078_c0_g1	1860	p3	(ATC)6	1608	1625	tggagaagttgtatgtcacttacccacaattcatagtctcgggatggacagaacactcgatcgtatccctgcactgatattaccattaaaacgacctaaaagaccctttgacggcccgtatgacatcctcagtgatcgggactgggacaagagtgccaagaagtttatcgccgatcgtcagaggtttatcgatcatcagcccacacggacagacaaacagaaggctgatggacatactggcttcttctctaatctgttcaacttctcataaaatacatatcacagttaatttattatcatATCATCATCATCATCATCaccaccatcattgttatcattctcattgtcgttatcaaaatcgccatgacaatatcatatttggcagcagctaaagtgtta…	PREDICTED: BAI1-associated protein 3-like [Lepisosteus oculatus]	Cyprinus carpio genome assembly common carp genome ,scaffold LG16	Uncharacterized protein {ECO:0000313|Ensembl:ENSLOCP00000004450} OS=Lepisosteus oculatus (Spotted gar) PE=4 SV=1
TR56877_c0_g1	1436	p3	(ATG)14	1	42	ATGATGATGATGATGATGATGATGATGATGATGATGATGATGatcaggtggaggaggagttggagaatcaatttgattctggacatccaaaggataaaccagtggaggagaagaagccttttggacgggtgtccacgttttgtcctggcagtcctgatttatttggaatatcaagaaagttgagtggcaagacaatagagactgtggaagagatggtagtgaagaaaccagaggctagaagacttgaagtggatccatttcttggtgttgaaaatgaagatctgtttgctggaccagtccagaaacaggaattagaccaactgggtggagtccaacaggatg	PREDICTED: palmitoyltransferase ZDHHC5-like [Larimichthys crocea]	Hypophthalmichthys nobilis microsatellite Arsd410 sequence	Uncharacterized protein {ECO:0000313|Ensembl:ENSGACP00000018931} OS=Gasterosteus aculeatus (Three-spined stickleback) PE=4 SV=1
TR3291_c0_g1	3738	p3	(TGT)7	3669	3689	gaagtcatttctaccagatttgtcaattctactgtcctcagacactctaggaccaatttctgcggacagacaacttcagtatttactgggtgcagtttacgaactaacaaactctgtcgtgccatgaaaaattactttgatcactaagtcttgtctagtgtgaactgaacacgcgttcaaaatcatgatcagacgttagatgtgttcagacagatacagacatgtaaataagaagacgttaatcctaacagcctcagtttatcagctgcatggacacaaagtcgagaaaattaaacatggTGTTGTTGTTGTTGTTGTTGTatctcagaaataaaatatcgccacctttacaagaactacttaaaagtta	PREDICTED: nuclear pore complex protein Nup133 [Callorhinchus milii]	--	Nucleoporin 133 {ECO:0000313|EMBL:AAH52764.1} OS=Danio rerio (Zebrafish) PE=2 SV=1
TR30081_c0_g1	3421	p3	(CTC)5	2362	2376	gataagcttgcagttaggattatattgtaagcagtatgttgtgatgtttactgtagttatcatttaacaagttttctttctctactagtaatttttacactcctattgatcacttatggccaggtctgttattctgaaccaattgagtgatatcacagtgttgtttgactaaagaacaaatatttgttgctagaacagctcccctcatcgtctgggcgctgggcgtatgacctgaacttgatgacccctgtcagtctccgcctctgtctcctcctcctcactctcttcttcttcttccgaCTCCTCCTCCTCCTCttcctcgtcggtttcttcttcttcatcatcatcatcgtcatcatcaatcatgttccctaccccattggtggttggtctctgagg…	PREDICTED: protein FAM92A1 isoform X1 [Larimichthys crocea]	PREDICTED: Acanthisitta chloris myelin transcription factor 1 (MYT1), mRNA	Uncharacterized protein {ECO:0000313|Ensembl:ENSGACP00000006728} (Fragment) OS=Gasterosteus aculeatus (Three-spined stickleback) PE=4 SV=1
TR51444_c0_g1	2044	p2	(AT)6	1941	1952	acttgggggcctgttcagtttgaaataaaggcatgttcttaatactgtgttcaatttgatcttacaaacgatgaaatatcatttcatttaaacaaaataatatatattttaaacgaattaataccactatataagtatgaaatgtcaatttaagggcttattttatatacacgtaattacagaccttttattgagatctgctgctgaagatgtttgattcagttggctgaaatttacagttagcagtttgtctattttgatgcatgtgccttttttattcaagagctttcttcttacgtaATATATATATATggcaagatattgatgtttttgtgaattttagaatagacttttagataagtgcgtcatttaataaacattttgaatacagtcatgtac…	PREDICTED: cornifelin homolog [Astyanax mexicanus]	--	Uncharacterized protein {ECO:0000313|Ensembl:ENSAMXP00000019415} (Fragment) OS=Astyanax mexicanus (Blind cave fish) PE=4 SV=1
TR23881_c6_g2	3153	p3	(TCA)5	2427	2441	atggtgtatttctgaggtttggaacaatctgtactgttgattgacacccgatcatgtgcactggcctcactcttctctttgagaactttaaacaatcctccgatctcatcatcgtcttcagtatccttgtttttatcttcactactctgctcttctttgccgtagatgaattttctgtaattcactcgtcctaactgcctctccctgaaattggctgcggcctgtgcggctaggtcatgtttccatttgaatgattcctcttcatcatcatcttcctccatatctgatgccatctcctccTCATCATCATCATCAgtttcttctgcttcaataccactctcctttaattttgacactgacaatgctgctgctggtgtcacagctttttcctcaggtttc…	Ribosome biogenesis protein BMS1, partial [Chlamydotis macqueenii]	PREDICTED: Danio rerio calsequestrin 1b (casq1b), transcript variant X3, mRNA	Ribosome biogenesis protein BMS1 {ECO:0000313|EMBL:KFP37757.1} (Fragment) OS=Chlamydotis macqueenii (Macqueen's bustard) PE=4 SV=1
TR23881_c6_g2	3153	c	(TCA)5atattgtcatcatcatcttcttcctcttcaagatctttatcatcatcac(CAT)8	3066	3153	tttaccgttttaacatcttcttcactatcactttcactgctactttctgattcactagaacttaaatttggtttatttttattcccttgatttgaagttaaattcaattttgttaccttatcaccaacattatgagatttactttttgatggtttaaccactgaaggtttaagtttttgtgtttcttgttttagttttgcactatttttgtcacctttaacatttttgtcaggcaattgctttttagaacttttcttgtccttttctttttctggcaaatcatcgctatcatcttcactgTCATCATCATCATCAatattgtcatcatcatcttcttcctcttcaagatctttatcatcatcacCATCATCATCATCATCATCATCAT	Ribosome biogenesis protein BMS1, partial [Chlamydotis macqueenii]	PREDICTED: Danio rerio calsequestrin 1b (casq1b), transcript variant X3, mRNA	Ribosome biogenesis protein BMS1 {ECO:0000313|EMBL:KFP37757.1} (Fragment) OS=Chlamydotis macqueenii (Macqueen's bustard) PE=4 SV=1
TR51500_c0_g1	1859	p3	(GCA)5	350	364	agttgatggttgttacattgtgactgagtaaaaaacagagccttccttcacagagtggtgtacgaacagacagatacttgggatttatacctggcaatcttaccatataaggaccaataacaagtctggaactataacatcacagctgaaggattagaaagaaaggcggaaatccgtgtgtggatataaatatgaacatatgtattaaggatgtttgttgaagatttctgcaagacagtgaccatctttgctctgtgacaagttaaccagcctggttgcgtaacgaagtagagaatctctGCAGCAGCAGCAGCAgctggtatactattggatttacaactgtgacagttcaaaattacagtacaacactctgggagctggtcagctgtagagcagttc…	PREDICTED: LOW QUALITY PROTEIN: dystroglycan-like [Taeniopygia guttata]	--	Uncharacterized protein {ECO:0000313|Ensembl:ENSTGUP00000005324} (Fragment) OS=Taeniopygia guttata (Zebra finch) PE=4 SV=1
TR46816_c0_g1	1826	p4	(GTCG)6	1787	1810	tgatgttgattgtattggttgtttctgctgtttgaaagctatgtacagatcatgatcagtgtaaacagtatgtttgctgggttttatccagttggggattaatgaagtgttttttatgagtttttaacttatttgtgctgagctggtgcattagactgcccccatccctatgttctgttatatgttattctgtcatcaattttacgaagaaaattaactgtgacagggaatttatttttctgtttttatacccccacaaatgaagtttgagggggtatataggagtgagcttgtcggtcaGTCGGTCGGTCGGTCGGTCGGTCGgattcttcgtttccag	PREDICTED: BTB/POZ domain-containing protein 1 isoform X1 [Esox lucius]	TPA_asm: Oryzias latipes strain Hd-rR, complete genome assembly, chromosome 3	Uncharacterized protein {ECO:0000313|Ensembl:ENSLOCP00000015909} OS=Lepisosteus oculatus (Spotted gar) PE=4 SV=1
TR43066_c1_g1	2143	c	(A)25ccc(A)12	1	40	AAAAAAAAAAAAAAAAAAAAAAAAAcccAAAAAAAAAAAAcacacacactaaaaacagagaggaaaagagagcatatttcataacatgatcgattcctaataagacaccaacctgagtggtaatcgtcttttttttaattaataattttataaaccgttgtctcttttcctttctacttgttggctgtgtaggagcgctatgtcttctgggtgtggcaattcctgataagcacatttcactttgaaccttcagtgacaaacgcaagaaattaaagctgaaatatgtgcataaaaaggtgtgatggccatttgtgtttttatctttgtttgatttctactt	--	PREDICTED: Merops nubicus anti-silencing function 1A histone chaperone (ASF1A), partial mRNA	--
TR41540_c2_g1	1802	p3	(CTG)5	1700	1714	atcctggaactgttgtaagggcttgggttgactatacataggctgttgaacactctgaggtggcattcctggctgaggcctgatgttggctggcaggggcccttggaagttaggattcacatgtattgtggaagctatagactgaggtaaaagaggctgaggcggcggtaacaggggctgaggctgagaatgctgtaatagaggccggggctgtaagtgctgcggctggatgtaatgtggctgctccggttgggggacttgatattgggtgtgagtttgttccatcaggggtggggtgaaCTGCTGCTGCTGCTGgtcctgatagtgatgagggctctgatttggcagtgacatgatttgttgtggtatgtgtgttgacagtgcttgctgatgactcat…	PREDICTED: RNA-binding protein 33-like isoform X2 [Neolamprologus brichardi]	--	Uncharacterized protein {ECO:0000313|Ensembl:ENSONIP00000007477} OS=Oreochromis niloticus (Nile tilapia) PE=4 SV=1
TR11248_c0_g1	1282	p3	(GAT)5	1142	1156	tcatcagccctgggacagtgtggcttcccatcacagacatatgtgttctctatacaagtaccatctgaacacctaaacatattgcctgaacacactgaaactggtgtagttgttatagtcacagttgctgtggtaacaatttctgtcgacttcacgcttgagatcacagtagtttgtggaattttgcttgaactgtccacagttagagtggctgtggtcactgatggatacactggttttgatatggtagatattgtagatatgtttatggaatgggttgtcttggacacaactggtgtgGATGATGATGATGATgaccatgatggtgagacggtggatgaggatatcactgatgctgctgatgatggagttggtgagatggttgatgatgaagatgat…	low-density lipoprotein receptor-related protein-2, partial [Gallus gallus]	--	Low-density lipoprotein receptor-related protein-2 {ECO:0000313|EMBL:CCD17864.1} (Fragment) OS=Gallus gallus (Chicken) PE=2 SV=1
TR54418_c0_g1	2093	c	(ATG)5gtggtggtggtgtaggtgata(ATG)7	41	97	aatgtcttgttgctgttcactataactgtgactgaacaaaATGATGATGATGATGgtggtggtggtgtaggtgataATGATGATGATGATGATGATGatatttttctcatacataaactgttagaagaatggagtttggatttgattttgatgatgatgatttcacagaaaagatcagagaaaaacagatccatgcatcatacaatgctaaaatctgctacccagagtggttcctgagtgatgaggctgagtctgaggacaatgatagagccacactgttcaaattcaggggagattactattatcataagaaggatgtgaaaacagcgatagaatgctacaagacatgtcttgacaatcttggcccaagtaacagaaccatgcgccgtgagatgat	PREDICTED: uncharacterized protein C8orf76 homolog [Latimeria chalumnae]	Epinephelus bruneus DNA, microsatellite: locus Ebr00354FRA	Uncharacterized protein {ECO:0000313|Ensembl:ENSLACP00000010973} OS=Latimeria chalumnae (West Indian ocean coelacanth) PE=4 SV=1
TR44879_c0_g1	2038	p2	(AC)7	742	755	cgagcaatctcaaacgatgggatactttttaaacaaatatctgttcatcaaaacttccaaaacaaaatattcataggttttatattttaaaatatttaccagttcacagtcttgcacatgattattatcccccccccatacacacatccttgtgccactgccgcatgtttgactgaaaaaacaatatcttaaagaaattgtaaaagttacattaacattcatagtttagcattagtcatgtctgaagtgaaatgcaggagaaccctgcttaaaaaccaccacaatataattagacccctaACACACACACACACttatcaaagcatgtttttgaagaaccagatagtataattgttcgattaattaagcaaaaatctagttgttacataaatttctatt…	#N/A	#N/A	#N/A
TR33463_c0_g2	4097	c	(A)12taatcgaaag(A)23	4053	4097	atcaaacactgtaacaaactcgtcacatgtagataggctggaacaaaccggtcaatatgccggtactcttactggttatacagagctttaaaatagtcagatacatgttttataagttatttaaaaaaagtcacaagcgttcaataaatggcgcctgtttcacaagtcgcgtaaacaggacgattgttgtggtataccggaagtattcgctgttaaacgggcgatgtgcgttctggtatgacacgcttggagttgatacatcagctttatcttgtgttaacttcaacactgtatcataagAAAAAAAAAAAAtaatcgaaagAAAAAAAAAAAAAAAAAAAAAAA	PREDICTED: filamin-B-like isoform X1 [Lepisosteus oculatus]	Cyprinus carpio genome assembly common carp genome ,scaffold 000028957	Uncharacterized protein {ECO:0000313|Ensembl:ENSLOCP00000016318} OS=Lepisosteus oculatus (Spotted gar) PE=4 SV=1
TR42136_c0_g1	2682	p2	(TA)7	2468	2481	catatagtcttttttctcaagcaaaggtaacacgccaatactccaaagtactaacaataaaaacaatgtgtgttacatcagaattttactcagcttggataatacgcaaatactttaaaatactataaatatatagacaacgattgttacataaatcttccgatgtaacagttcctgtccaaattaccatcaagcaaacttccaattctgtcgtgatctttccgtaaggctaaatgaccatgataatacgaatattcgtaaaactgtcccagctaaaacacctatgtagactgctttatcTATATATATATATAttattactattttgacaatctggaaaataataaaatggtaattacaacacgggccattgcctgagattgcaattacatgaaatac…	PREDICTED: ubiquitin carboxyl-terminal hydrolase 15 isoform X8 [Chrysemys picta bellii]	--	Oncorhynchus mykiss genomic scaffold, scaffold_100 {ECO:0000313|EMBL:CDQ61013.1} OS=Oncorhynchus mykiss (Rainbow trout) PE=4 SV=1
TR53767_c1_g1	5181	p4	(CAGA)6	1	24	CAGACAGACAGACAGACAGACAGAtaattttatttccattaggcttaaaagcccatgaggataacattttgcataatacaagatagcgaacagcagtgacaaatatataaacttgttacagcacaactaggagtaacagcatttaggccaatttaaagatgggtggtttcaataacccaaccaatatatagttggatattgatcagaaacccgaagagtatacataattcctgctttttaaatattttagcagttgatctcgttttaagttttccactttacaaaaattacagtcttgttatgactttagattttgccttcatc	PREDICTED: cartilage intermediate layer protein 1-like isoform X2 [Oreochromis niloticus]	Cyprinus carpio clone 100113 microsatellite sequence	Uncharacterized protein {ECO:0000313|Ensembl:ENSONIP00000003062} OS=Oreochromis niloticus (Nile tilapia) PE=4 SV=1
TR35272_c1_g1	4141	p2	(TA)10	127	146	atcaggatcttcactgttccattttggaaccatttggttatttctgatgaagaagaatacagtgtagatcctgatcagatgtgccagttgatctggatttacactattggctagtgtgataaaagcTATATATATATATATATATAtggagtcaaaggcttaatgtattgcttatttcactaacacttttctaataaaatatttctctcaagatctattgaaaaaccaggactctctggcaacttgcggtttgacatagtttctggcagattttgcttaattatttcaacagaaacataattatgctaatgtacatcttattaatagtcatctgtttgaagccttaggatttagaaaccattgaagaaaattcaacaactttgtttttgttccacctaa…	PREDICTED: RING finger protein 17-like [Pelodiscus sinensis]	--	Uncharacterized protein {ECO:0000313|Ensembl:ENSPFOP00000007280} OS=Poecilia formosa (Amazon molly) PE=4 SV=2
TR32183_c0_g1	2685	p3	(CCT)5	1241	1255	ggacatctacccgtcgtgtccatcgtttcacggctgactgaccaccactcatcactttagggtagaagaatgtgttgaaagcgtaaactttaggatgattttccttctctccccgctccattaacaaattcatgtaaaaatttattacttcatcattaagccagttgaggccagctagtgtggcgatatcccccctagtgatctgtagccggaacttgtcgaccagaacctgacctggatttcccggtgaaagggcactgtttatcaccttttccatctcggctgtcagttctggcaaggCCTCCTCCTCCTCCTcttcctcctcactctccaccagctccacaggtggctcctcaatgacaactggcgccctctggtggatccacatctgctgccgaa…	unnamed protein product, partial [Tetraodon nigroviridis]	PREDICTED: Picoides pubescens SUMO1/sentrin specific peptidase 1 (SENP1), partial mRNA	Uncharacterized protein {ECO:0000313|Ensembl:ENSTNIP00000018106} (Fragment) OS=Tetraodon nigroviridis (Spotted green pufferfish) PE=4 SV=1
TR37571_c0_g1	2503	p4	(AAAG)9	2465	2500	cgttttcgctggtgatatttcactttgggacttggaaaacgcaacacttctagcagcttttacacctgacacccgtatagaagtggtcaacgttgtgatgagtgggcagttaataacaataggtgtgcatgaatttgccgagctgatagtccttaaaatgtccggaaaggacgtcaaaccgatcatggatacggaacataacgatctgtttggagagacgacaggagatacttcagatgaggaagaagaagacgaagaggatgatttataacaagaagaatattccaacaagaagaagatAAAGAAAGAAAGAAAGAAAGAAAGAAAGAAAGAAAGaaa	PREDICTED: uncharacterized protein LOC102364681 [Latimeria chalumnae]	Agkistrodon contortrix clone E33DIFJ02H7TSP microsatellite sequence	Uncharacterized protein {ECO:0000313|Ensembl:ENSLOCP00000016886} OS=Lepisosteus oculatus (Spotted gar) PE=4 SV=1
TR14204_c0_g1	1936	c	(AAT)5aaaataaataatcgttataataataata(ATC)6g(TCA)7tgt(TCA)16	1801	1934	atcgtcgaagtccttacataaaagtacagacacaacttataataaagtaggcgaacgacttgaaagagatgacgagtctaccgtacgtactattacagatagcgaccagaaacttacggactattccgcggttgtattacaggagacatgtaataagagtgaatgatcaacttccgtttccatatcatatacttttcctggttaagaagttttccttgtaaataacttttccttcttaactgtgtcctcatcaaatatttaatttcttcaaatgagtcatattaatacactcagtaatacAATAATAATAATAATaaaataaataatcgttataataataataATCATCATCATCATCATCgTCATCATCATCATCATCATCAtgtTCATCATCATCAT…	unnamed protein product, partial [Tetraodon nigroviridis]	Ictalurus punctatus immunoglobulin heavy chain gene locus, partial sequence and unknown gene	Chromosome undetermined SCAF5157, whole genome shotgun sequence {ECO:0000313|EMBL:CAF88611.1} (Fragment) OS=Tetraodon nigroviridis (Spotted green pufferfish) PE=4 SV=1
TR26231_c0_g1	2780	p4	(AGAC)6	1	24	AGACAGACAGACAGACAGACAGACcgacgcacaacgggcggaatgcaaacctatagtcctctccggcacatcagtaggagattaatataaacgtcttcgaattaattgataggataaatgaagatatatcccgacggtggaattatcaaggtcgtcaaaaccgaaagcatcgaacaaatctaataaagtttgatgtgaacgtatattatctccatagacaaatgacaacatcctttgatttcctcagtgtagcctcactaaatttgattacatttggcagcattgttctgtttgctttgcctaacgtgggtaacattgcaaaag	unnamed protein product [Oncorhynchus mykiss]	--	Oncorhynchus mykiss genomic scaffold, scaffold_2319 {ECO:0000313|EMBL:CDQ84893.1} OS=Oncorhynchus mykiss (Rainbow trout) PE=4 SV=1
TR40332_c1_g1	1995	p3	(TGT)5	1376	1390	agttccttgtaggggccacgacaaggacttcatcagggccccagaactcatcggatggcatcaggaaggcagtactgggcatactcctctgttctcgtctgacattgagggatttaacgattggcacatccaggttgtcaccggagatcatcagccggattggcttagctgctcctccccacactccagccagtgaaataaaacttttgataaatttatctttccatgcttgtgtcatatgattaagcagataaagggtcatagggttccccatactgtggcctagcaacacgactttcaTGTTGTTGTTGTTGTaataggtttcctctatcaactttttcagactgtctaagaaaggctgaagctcattaggggcttttctgaagtcataaggagcac…	PREDICTED: group XV phospholipase A2-like [Haplochromis burtoni]	--	Uncharacterized protein {ECO:0000313|Ensembl:ENSGALP00000001115} OS=Gallus gallus (Chicken) PE=4 SV=1
TR26016_c1_g1	1870	p3	(GCT)5	1559	1573	cagaatacagcaggaaagatcaccgagtattctgtgtaccttgctgtcagaaatgctgcccaacaagccgagcagaaacctggcagtgctgcccagctcgcatttgttcgagtcttctgtggtcctagtgcttcatgtgtcgtcaactccaacagtctggctagtgctcacattgactacaccactaagccagctatcatcttccgtatagctgccagaaatgagaaaggttatggaccagcaactcaagtcagatggttacaagatgctgcccaaggaaatgccacagctacagctgcgGCTGCTGCTGCTGCTgcagctacaaaaatggctgttaaaagaactgtcgacccgtctcagctacaagcaatacagatgaagaagctgaagacagaggaa…	PREDICTED: host cell factor 2 isoform X3 [Callorhinchus milii]	PREDICTED: Python bivittatus host cell factor C1 (VP16-accessory protein) (HCFC1), transcript variant X2, mRNA	Uncharacterized protein {ECO:0000313|Ensembl:ENSLACP00000015444} OS=Latimeria chalumnae (West Indian ocean coelacanth) PE=4 SV=1
TR48811_c0_g2	6590	p3	(ACA)6	465	482	acctcaaacctaggtgaaagtctaatacagatatactatgtataaaaatttgatacaactttatagagcattttagttatttctataaagaaattttatgtttgattattacttaggtcacaatagctcagcaaaataaacgaatcagtgacaactttgatactgatttcaaataaaatgaacaaaatattaaacattttggagaaatatagaacattagaacagattactgttgtaagttaatcactcctaccatcatatccatgttgtgaggagacaggggctataatcagggaactcACAACAACAACAACAACAactgttgcaagttacacatacaaagtacagcaacatagaaaagctgttaggtagcagctcttgtatcacagtaatatatgg…	PREDICTED: roundabout homolog 1 isoform X2 [Cynoglossus semilaevis]	--	Uncharacterized protein {ECO:0000313|Ensembl:ENSTRUP00000013698} OS=Takifugu rubripes (Japanese pufferfish) PE=4 SV=1
TR55070_c2_g1	5531	p3	(TGA)7	4787	4807	tgaactcgccaatgagcatatgtatgattcggacgatgatgatagtttgaaagatgtgaacaaatatgtacattattctaggcattctagtgtgaatgataataaacaaggcatgccaaagaaggcaagtatggtaaccaacagtgcgtttgataatttgctggatacagcagacggcgaggattcagacatcgatgacaagttcgatatgtatcagccaatcacagaaagcctgacagacagcgaggaaaactcatactattctgctgataatgcattagagcgaaaaactattgttatTGATGATGATGATGATGATGAcgattcttccagacataattggaaaaaatcagacgatcacaaaactgggtcaaactcccacggggagcctgaccctga…	PREDICTED: glioma tumor suppressor candidate region gene 1 protein isoform X2 [Poecilia reticulata]	--	Uncharacterized protein {ECO:0000313|Ensembl:ENSPFOP00000023802} OS=Poecilia formosa (Amazon molly) PE=4 SV=1
TR2789_c1_g1	2039	p4	(ACGG)5	14	33	gacggacgtacgtACGGACGGACGGACGGACGGacgaaaagacggacggacggttcaatcactagatgccgggggcataaaaagaaaacacgagatacatgttttcatttttaaactaccaattcaatagctttcataaaatttcggtatataccgaaacccaaaaaagacattcaccacaaaaaattgtaataccaaaacattttaacggtcgcgtctgctcggcaatattatacatgaaatagagctcagcgccaggtaagtatatgattagcaccaataactattcagatcatataggtcatatgagtgtacggaaaaccacgaaatttt	PREDICTED: interferon-inducible GTPase 5-like isoform X1 [Anolis carolinensis]	Zebrafish DNA sequence from clone CH73-52D20 in linkage group 16, complete sequence	Uncharacterized protein {ECO:0000313|Ensembl:ENSACAP00000005118} OS=Anolis carolinensis (Green anole) PE=4 SV=1
TR12894_c1_g1	1728	p2	(AT)6	617	628	gaaaattacatggatacaagtgacatgacatttttaacattatagatttattattaattaattttctctgctggtatgtagtgttggcatgatgatattgcattcaaatacacaaatctgtctcaaataaatggactataaaaacaatcgacttgctagataaaatatttagaagaacttgaacattaactactgtggataatacatttattggaaatgcagtttgcaaacagtatcttttacataaatcaaacattgcattctctcatggactgtacagaatcacctagggtgttcaacATATATATATATttggttgtgttccttttatcttgatgtttcttgtgttttgattttttgtgtgtccaaattccaagttgggtaaaagaaagaaaacat…	#N/A	#N/A	#N/A
TR12520_c0_g1	1769	p3	(TGC)5	532	546	ggcttgtgactgtccttctctgacttgagccctggtacaggagagccaggcctcagtggagcatccacaggaacatcgtcatcgtcatcagctttatctagcacaccttgaatctcgtctgtcggggagggcggggcttctatctgctcctcttccactatgccgctatcacgtgactggttgacatcctgtgcatgccggttattcctccggatatccagcatatgttcaatggcatcgttcatcatgttacttacagcaacatcggttctatcatcaatatgcttttctgtttctcgaTGCTGCTGCTGCTGCtggtttcgaacaggttgctcatcttctctaggagtcaaaggttctggttcttggtccgaaggttgtaaaaagtgttcgagatca…	PREDICTED: centrosome-associated protein 350-like [Lepisosteus oculatus]	--	Uncharacterized protein {ECO:0000313|Ensembl:ENSLOCP00000011308} OS=Lepisosteus oculatus (Spotted gar) PE=4 SV=1
TR36464_c0_g1	7413	p3	(CAG)5	4169	4183	agtccagcagttgaaccctgtacagacacaggttttaagcggaactcctggtgttgtgcttagaccccaggttattcagcaagctggacagatagtgacacagtcacctgtgataggtaccaatatgataaccagtcaacaactagtggcaatggcaaaccaaggcttgcttcagttaggcatgtctggtggaaacacgaattctggacaaatgagcatgcaacagagattggttactaatggaaatcagacttttttactgaatatccctgtggtgagacccactaccagtatcatgaaCAGCAGCAGCAGCAGcaatatcagcagcagcagcaacagcatcgtttctggtagtgtcgtgccgatgccagccggtagcactattgttactgccgtctc…	PREDICTED: lysine-specific demethylase 4B-like, partial [Pelecanus crispus]	PREDICTED: Chaetura pelagica lysine (K)-specific demethylase 4B (KDM4B), mRNA	Lysine-specific demethylase 4B {ECO:0000313|EMBL:KFP33428.1} (Fragment) OS=Colius striatus (Speckled mousebird) PE=4 SV=1
TR23923_c2_g1	6402	p2	(AT)6	6246	6257	acagagcgagactacatcaggataattgagaactggcttatgccaatactttctcacaaaccaggtaacaatatggtaaaacattattgtttggagacacttctagagttaactcccttgtatcccacatgcttggctatgatacagaagtggttcctggagaacaagtatgccatcaacagagacctgaaggcaagactagaggagctcagaacacaatatctcaacacatttggactgatttgtagacctttctttgcagactgatgcagcagataatctttcacaaccctttacttcATATATATATATggcgtttagtgcgtgtgtgcaaacagcatagatccagattagctgccacatctgtgctgtctgatttggatcaacactgttctccgt…	PREDICTED: uncharacterized protein si:ch211-250g4.3 isoform X2 [Danio rerio]	--	Uncharacterized protein {ECO:0000313|Ensembl:ENSPMAP00000000285} (Fragment) OS=Petromyzon marinus (Sea lamprey) PE=4 SV=1
TR20184_c1_g1	1926	p2	(AT)6	1383	1394	agcaccattttaatatttgtttgccaatcaaatcaaattcaacacaattatcatccatttcatagatttgtaagttgtttattaaaattacattcattatcaattatcacagatacaagtacaatcatagacaaatgttaacacaattaactgacaaatctaagcccaaaaccttcattaatcaagcttcaggatgtagaatctacaagtgtatctacctcaggcacataaatatggttttctttggtaaaactgtatttttaggcttccataatttgtggttttatatttataaaaagaATATATATATATttaattatcccttcacttcatgggatatggctgttatcccatgatgaaaagtatagatccagatcagctagcacatctgtctgatca…	#N/A	#N/A	#N/A
TR44893_c0_g1	2476	p2	(GA)33	2410	2475	tccttaatctaaagaactttttcatatgaataatgttgcaggaattacgtacctgtttttaacttagtttaaactatatttattcatcataggcacatataaatacaacataaatatttaacataaagagaatggataagagaacaagtgttaactacacttatattaactcttttccaggtctttaaagtaacttgtttcaatgcgcatatcatagttcggtaccaaatcgattcacaaaagtaacagtattcaagttttgtacagcgtaacaataggggaatcaaatattaagagatgGAGAGAGAGAGAGAGAGAGAGAGAGAGAGAGAGAGAGAGAGAGAGAGAGAGAGAGAGAGAGAGAGAg	PREDICTED: RNA-binding protein 25-like, partial [Geospiza fortis]	Callorhinchus milii BAC clone IMCB_Eshark-18H12 from chromosome unknown, complete sequence	Uncharacterized protein {ECO:0000313|EMBL:EMC79722.1} (Fragment) OS=Columba livia (Rock dove) PE=4 SV=1
TR25991_c0_g1	1449	p2	(TA)6	1096	1107	ttgtttttttgacatccttgacattttccaaaaaaaaaagaagaaactattttgagtgattcatattataaaactgctgattaccactgactgaaaaccggtttgtagcactgactaacatcacatcaatttgaagattcatgcttttaaacccaacagctatcaaaaacatacacagtgttttgtttttaaacagtaaatttgcatataatatgatacaacaaataatgcagatgttctacaacatattattccaatactaactcaaacaggtttcacttcatcttgccagatatttctTATATATATATAaaatgtgactgataattttagtttgctttaaatattatatttcaaatgatttcacaaatttaaaagcacaaacctaaaatatgtttg…	#N/A	#N/A	#N/A
TR16930_c0_g1	2715	p3	(ACA)5	2646	2660	tttgtgcaaataattattttcttgttaatactttcttgtacatacatgtaatattcatccatgaaaagccagaaagggctcatcagtgattgttcaaaggaagatgataagcccgtcttgctttcagtgaatgattatcctgtcagattgagtcagcactgagtagatttttattcgtgtaccatcttgtaatgttcatagccatttcaacaattttgttataatgataaattgctgccctagtgctaaaacagtataaacaccattgtaataaaagtactcctgttttatacttgtgtgACAACAACAACAACAccaatgtgttttctaagttgttctgtgcacagaaccgtgaatttcaagcaggttg	PREDICTED: nucleolar RNA helicase 2-like, partial [Eurypyga helias]	PREDICTED: Chelonia mydas DEAD (Asp-Glu-Ala-Asp) box helicase 21 (DDX21), mRNA	Uncharacterized protein {ECO:0000313|Ensembl:ENSFALP00000013597} (Fragment) OS=Ficedula albicollis (Collared flycatcher) PE=4 SV=1
TR20038_c0_g1	1129	p2	(GT)7	397	410	gtatatggttttttttgttttaaatggacagttgttgtgtcctatacatccttttgggtatcatgcgcatttttttaatataaactgaaccagtcatttgatattacatatagtgtttttgttttattatttttgcaccactatactctcctttcactgtttccgatcttgtgagtaaacctgtgatcacgtaacaattcttcattgaattgatctcaccgaatttttcatttatccaggtgattatgtttcctgttaactggtgtcaaattttcgtgtttgtgttgtttttttcagtccGTGTGTGTGTGTGTctgcatgtgtgcatgtttgtgtgaaatagttagaaagtgcatatgttaaatgaaattatcacatgtatgttgtttcctggatatt…	unnamed protein product, partial [Tetraodon nigroviridis]	Zebrafish DNA sequence from clone DKEY-46N5 in linkage group 11 Contains the 3' end of the gene for a novel protein similar to phosphatase and actin regulator 3 (PHACTR3, zgc:109967), the 3' end of the gene for a novel protein similar to vertebrate isoleucine-tRNA synthetase (IARS, zgc:63790) and two CpG islands, complete sequence	Chromosome undetermined SCAF11610, whole genome shotgun sequence {ECO:0000313|EMBL:CAF93943.1} (Fragment) OS=Tetraodon nigroviridis (Spotted green pufferfish) PE=4 SV=1
TR35346_c0_g2	1408	p3	(TGT)6	263	280	tgcagtcgtttctgactggctcttgttatgataaattcttttcatgtacaggttctggcaccagacggttattttcattatttagaactaacttgtgattttagttgcagttttaacactgagctatcatttaaaatttgtattgttacaaacttcgctaccgggggcatatgtgttttccgaacacagcttcttgttttattatgtctttatgtcattactctataaaattaatctccaggttttcagagagcagaataaaTGTTGTTGTTGTTGTTGTtaggctgaatgaaaatttggggtagtatatggtaataagccacattgtctgtccatccaatattcaagttttccccgtatctttgatatgtgaagtcacaatttaaaatttatttgaca…	#N/A	#N/A	#N/A
TR29283_c0_g1	3845	p2	(AG)6	2564	2575	aaaatgctgggcctcaagaaacgctgctctcaggactccatctccaagatggctctatctctgagcaactttatctccgaggagatggaggcagagatctccaagcagaagctgacattgtacaggagtcttctgtacgaaatgtcagtactgaaaccagcagtggtgatggaagatatcggcaatcagatgaaagctgccaagatggaaccaaacatgcccagtcgggggaaaaaaagtgaacacgccaagagatgaagctaacaagatcaaagaagagagactgatagctgaagctaaAGAGAGAGAGAGaaaaggagagtttagtgtgttgagatctctattgaataccgctagtgctcaaaataagacaccatgtgatattaaacttgatgcatt…	Nuclear respiratory factor 1, partial [Tinamus guttatus]	--	Nuclear respiratory factor 1 {ECO:0000313|EMBL:KGL74516.1} (Fragment) OS=Tinamus guttatus (White-throated tinamou) PE=4 SV=1
TR18770_c0_g1	1544	p3	(AAT)6	1155	1172	acggcaatatattccaaagtattactatatacaaacaagtgttatgaaatacattttattaatgcaaacctcaaacaaaactcttcttagaaaattagcaatgtattgtgacaagtccttcaaactaagagattcgttaatattgtaacttttctgtttgatttatgtatattgtttctactgttttgattgaaaacacattgtaatggctttttgttatttctcataaaatataggatatgtacttttgttttttctaaagcaaaacattgactagaatatttcattatctaaacgtaaAATAATAATAATAATAATtaccaaataatgcttaaaatctgcgttacccataagcatatgtctgtgcgtatatgtatattgtatatgttatgtatgaat…	PREDICTED: uncharacterized protein LOC104955046 [Notothenia coriiceps]	--	Uncharacterized protein {ECO:0000313|Ensembl:ENSACAP00000023049} OS=Anolis carolinensis (Green anole) PE=4 SV=1
TR40004_c0_g1	3671	p3	(TGT)5	1002	1016	ctattagattgtgtttgtggttgctgagagaattgcacagagtgtacctgaggtctgtgaggctgatactggaggcggatctcaccttggttaggggtaggggcgtgtggtctgtaaaagcttgtgttggccatctgcacttccagtggaattggctcacaactctcaccactgccattttcacctcggccaacccctggacttgtctcgaaggacaatcctttagcactgactgtgacatgctgtgcagaaccttgtggtgacttgctgatgccggctacaacaaccgactgatgtggcTGTTGTTGTTGTTGTagttggtggtggatctgcataggcatttgcatattgggtctatacatactgtgaaatgtcggtgtggaagcaacttgaccctgt…	PREDICTED: cAMP-regulated phosphoprotein 21 isoform X10 [Corvus cornix cornix]	--	Uncharacterized protein {ECO:0000313|Ensembl:ENSMGAP00000017419} OS=Meleagris gallopavo (Common turkey) PE=4 SV=1
TR20673_c0_g1	1652	p5	(ACAGA)5	277	301	aaagagaggtaaataattataaatacgtacttattaacaagatagtaatacaaacaaaggcactgtttctgatcgagctctagctttaataatctcggatatgatttataattgttgtattaaagtttggggtttaaaaagagataacaaagatagttcgatttgatttattcaaacgctagtctaagaataccttttctactctactgtactatattttcaagccatgcatgcagggtattaaattacaggtacatgtcagaaatagctaacactACAGAACAGAACAGAACAGAACAGAacatttcttttattcgaagtcaggttcacaaagaacaacatgataataatatacgttacaataatgggataatggcagacagtagcaatttatcgaat…	Heat shock 70 kDa protein 12B [Chelonia mydas]	--	Heat shock 70 kDa protein 12B {ECO:0000313|EMBL:EMP31892.1} OS=Chelonia mydas (Green sea-turtle) PE=4 SV=1
TR5035_c1_g1	1225	p3	(GTT)6	1130	1147	ttaattaaggcttcacatattaacatcaccaggcaaaacttccaaggagactgtattttagtgttgatcatgatgtgtctaaatgctggacgtttgagcagcaatacatccaggctgatgatgactaaatcatactctacatatttgtctaccacacaaccgcaaacagtacacagtgccatttttattatccctcctttatattggtggtacaatttgtctgcgtgatgaccacatgatgtgcaaacgtaactcatcttgtacaaaataaataaatgattaaaagttttgacacgataaGTTGTTGTTGTTGTTGTTttccatataaaaatattacatatatacatttcattgaaggcaattttcaacatcaaaataaataaaggcaagccaggt	PREDICTED: protein ARV1 [Astyanax mexicanus]	--	Uncharacterized protein {ECO:0000313|Ensembl:ENSAMXP00000012671} OS=Astyanax mexicanus (Blind cave fish) PE=4 SV=1
TR1201_c0_g1	1028	p2	(AT)12	503	526	acaaggttgtgtattataatcaattgaatattggcttaaggaatttgacagttgcattagctgacattattagtatttatttacttaattacaatttgttaagctgttatttttcacacttcatcaacacctttattcaatattcactgttgtcattgaataaaatcagtactgcaacttgtgtgtatgaaattgtttatgtgaagggattgtcagctagtcaatgtagaacttagtctatacagggcacgtgatacgtccttgataggaaactagtgatgtaaatcgtattcaggctggATATATATATATATATATATATATccagcctgaatacgatttacatcactagtttcctatcaaggacgtatcacgtgccctgtatagactaagttctac…	--	Cyprinus carpio genome assembly common carp genome ,scaffold 000028849	--
TR5252_c0_g1	2697	c	(A)10ggaatttataatttgaaaa(T)26	1	55	AAAAAAAAAAggaatttataatttgaaaaTTTTTTTTTTTTTTTTTTTTTTTTTTctttatcatttcttttattttcagacaactttaatttggcaatatttctggtaaaaagatttttattagcctttcccctgaaataaaaaagggctttgacatttcctctgaataaaaacacagtatctttatctcatcaccaaatctttctgccaatgttaaaaacaatattacacactttaaaatggcatctattaaacagatacaatactaagaccccatcctcattgtattccctcccctgtagttactccctgatcccattttactttcacaatagatgcctgccaacccatgata	PREDICTED: cleavage and polyadenylation specificity factor subunit 6 isoform X4 [Chrysemys picta bellii]	Salmo salar clone ssal-rgf-525-155 Cytochrome P450 2U1 putative mRNA, partial cds	Uncharacterized protein {ECO:0000313|Ensembl:ENSLACP00000009781} OS=Latimeria chalumnae (West Indian ocean coelacanth) PE=4 SV=1
TR25507_c50_g34	1521	p3	(TGA)5	629	643	tgcaatggattaaatcagtattatatagcaaatttacatcaacaatttacgacagactaaatagaaattccaataaactccaaaattgtacaactgacatcatacagatttacagtagattgtacaaatacacatcactactctgtaacacccagatttgttacctctttaatcaatcatcaagtttataattgttagtgttttgtaatttttgttcaatttttaagaaattgcttttgttaccatggttacccattctccagaactcttcaaaaagtttctgtcagtataatgattgatTGATGATGATGATGAcgatgatgcaataatcaaagtaacaaatatcactcaatacactgacaaaaactttgtgaacacagcatgcctttttacacacct…	PREDICTED: ADP-ribosylation factor 1-like [Cynoglossus semilaevis]	PREDICTED: Poecilia reticulata ADP-ribosylation factor 1-like (LOC103468656), mRNA	Uncharacterized protein {ECO:0000313|Ensembl:ENSXMAP00000009214} OS=Xiphophorus maculatus (Southern platyfish) PE=3 SV=1
TR2029_c0_g1	1112	p3	(AAC)5	271	285	ataacctccaaccctggtctttgatcacaggtaaatttgttcttaaaaatcagtcagtgggacaaataaagtttggtcttttttccccatgtggtctttgtttacaggtggtcttgagcataggtttgactataaatagaaaggaactccatgcaagaaattcagcagtataaggtttaatgcagaaattattaactaaataaaccgataaaaatgctgactacaagaataaataaatttagtggattgtacaactaaaagtaaaaagtaAACAACAACAACAACataacaatctaagaaagaaaaacattgaggtttataaaaatgaatgcatcattttatttccaactagaactacacagtttgttaaaaatacagtaatagcagtttaccccatat…	#N/A	#N/A	#N/A
TR9579_c0_g1	1719	c	(TC)6tttctctctg(TC)6	29	62	tttctttgccgtgcatgacagcttcaagTCTCTCTCTCTCtttctctctgTCTCTCTCTCTCtgtgtctctgtctctctttctctctctttttttctctctccttctctcgaatatagatcgtattctattttatttgcaaaatagctacaatgcaactcgaagttactctttgttaacatatttaagttttagtattacttccatgtaaatatattatttccatattctatgttgactgacgcctattctaaaaacaattctgtgtgagtttcataaagcagcccatccgctgacaattttgagatatttctatcgctcaaagatttataaggacacgctgtttagtttatgcatttacgt	PREDICTED: cystathionine gamma-lyase-like [Lepisosteus oculatus]	Zebrafish DNA sequence from clone DKEYP-94G1 in linkage group 2, complete sequence	Uncharacterized protein {ECO:0000313|Ensembl:ENSLOCP00000012273} (Fragment) OS=Lepisosteus oculatus (Spotted gar) PE=3 SV=1
TR23739_c0_g1	3186	p3	(TGT)6	1422	1439	cctgggggtggggccgatttcttatccttatttccagaaggttttgattttccatctgctgtactttctgaaacatcccgtgtgtacccaggtggtggggctgttcttgctaccttgctgactacaggggctggcattttaaaactatcattactagacttttcttccactgctgtatcatcctcactttctgtagctttaaattttctcttgtaaggtttaatctctgtaatatcttcctgctgttgttcagcctgctgctgctgatggtgctgctgacgcttatttggtggtttggtcTGTTGTTGTTGTTGTTGTtttgcctgatactttccctgtttgtgtttgcctttgttttgacctttcttgtcaaacttgttctttgattcattctcaatg…	PREDICTED: squamous cell carcinoma antigen recognized by T-cells 3 isoform X2 [Esox lucius]	--	Squamous cell carcinoma antigen recognized by T-cells 3 {ECO:0000313|Ensembl:ENSDARP00000004923} OS=Danio rerio (Zebrafish) PE=4 SV=1
TR17475_c0_g1	1138	c	(A)13g(A)10	258	281	aaaataacatcagttcttaacagcttcacgaaaccaaaattttccaaaatattacgttttcgattcgacttggttggcatagttatttcaaagctgacaatcagaaataggaaagtcaagaaattagacaagaataatactattgctatttcagaagaatgttaaaaattgtactgttatttctggaaaatgtaaaaataatgatatgttgtatcttctgtcaacaaactttacctagatctaagtaaaaataatttAAAAAAAAAAAAAgAAAAAAAAAAttagacactaaacattcggcttttcgtggattaaataactcaacgtaaacttttgttgaagatagtccgcaaaatctcttcgaaacacctataaatcatcctcaataacattcggtct…	--	Zebrafish DNA sequence from clone CH73-45I5 in linkage group 5, complete sequence	--
TR50788_c0_g1	3465	p3	(CAC)5	1359	1373	aagagagatgttaaaggtttttcctgcaaatacattcttgaacataaaatgtctgctgaattggtctagaagtgctctctcattgtgagccatcatcatcatcaaaatctccaccatcctcatctagcaaaccagcaaacttgttactgtcactgaagtccttatttttcttttcttcaaacttgggcatttcgtcgattgactgtggcaggggcttttcccttttctcagcttttttctgagcagtttctcctcgcccgcgcccaaatcctcctctcccacctctgcccttacccctgtCACCACCACCACCACctctgttagcccaggcattgggcacatttgaaggggctgcattcaccggggctggacctggctctctcttaccagtaactcctt…	PREDICTED: eukaryotic translation initiation factor 4B isoform X6 [Esox lucius]	--	Oncorhynchus mykiss genomic scaffold, scaffold_5787 {ECO:0000313|EMBL:CDQ89993.1} OS=Oncorhynchus mykiss (Rainbow trout) PE=4 SV=1
TR55292_c0_g1	1162	p3	(AAT)5	998	1012	tgcagatacaaaaatgtcaaggcgttatcgaatagcgatgttggttgtaattattaaaaaaacaagaagagtttgaatattgaatcgtgaacaaaacaccaaagtttgaaaatatgtgcatttgcatgatacaaattacaacagctttaaaatatgaaagattatgtcgtgtctataaaaactattgtgatacaacattatgggttttacatacgcaccgtttgcatattttacgttctttttccttttaagggtttattcatttcaaggaaatgtaagagactttgtttcttattataaAATAATAATAATAATtgtgaatcaacttcttttggtctttactcatcgtgtgtcagtttcgatttcatcatcaaaacggtgaacacgtaaaatttctaa…	#N/A	#N/A	#N/A
TR27206_c0_g1	1050	c	(AAC)5aggaagcttc(ACA)5	522	561	ccaagtggtctcagtgttcaaagacttgtggtgctggtttgaagactagggatgtgaaatgcctagacacacagaaatcccccaatgctcaatgtggaaagggagataaaccatcactgcggagaacctgtaatacccaagactgtaacctacctcagctagacgaagatccagaatgtaaagatacaatgactcagtgtcgatttgttgttcaggcagcactctgcccctatgagttttataaaaatcaatgctgccattcctgtactttacaccacctaaaacacaaacagcagagagAACAACAACAACAACaggaagcttcACAACAACAACAACActtagaacagactgtgcaggattcttagcagttaacaatttaagtgaattgaagattga…	PREDICTED: thrombospondin type-1 domain-containing protein 4-like [Nestor notabilis]	--	Uncharacterized protein {ECO:0000313|Ensembl:ENSPMAP00000008585} (Fragment) OS=Petromyzon marinus (Sea lamprey) PE=4 SV=1
TR17329_c2_g1	1918	p3	(ACA)5	658	672	aaataatgatgatacacttggcaagattgtccatggattaggaaatctgaacctgcttcagggccaacatggaggacaaacagctcaacaaaatacaaaatctggcaatcaagataattttaatttggtagatgacattttaaagagtgttcaggataagcacaaacctgtggatgctgccttactggaggagcagcagaaacagcatcagatcattcctccaggtgaccatgattcagagaaaaatccgggttatcagaggcaggcacagaatgtgctgggacaggatggtcatggtgtACAACAACAACAACAtcctcagcagcaggaggtacaccaagtggtcaaacccaactttgatgacaacaatcatgatgacaaggatgcgcaccatgtaac…	#N/A	#N/A	#N/A
TR57017_c0_g1	1128	p5	(ACTGT)9	1081	1125	acactaaagaaggtacatctgttaaatatactaaaccaacttactttcagattataatcttaagcttacaattatatcttttacaaacaaaaattcaggcagctctcctactatactataatattatctatttacatgtactatgatattttgatttaatatttaacaaagttttttataacatccatttaacacttgtttaccctgctgacacttgttatttttagtctgttaaaaagctcttgagagcttaagttgattcttttttgtaactgtcttgatgactcaaaattttactgcACTGTACTGTACTGTACTGTACTGTACTGTACTGTACTGTACTGTact	--	TPA_asm: Oryzias latipes strain Hd-rR, complete genome assembly, chromosome 20	--
TR7249_c2_g1	1143	p3	(CAT)5	772	786	actggtacaataaaaatgttccgttttcttgtgacacaagttgaaaggatgttctgcttgtgaaaataatagtatgctcatactgcaagcttagaaagcccagaatgaaaaccagtctggtatttcttaaaaaattaagtaagcatggtagcctatcattataattttgagctgaaatcaaactcaatattgtttctgatttttgggccatgggctcactgtattagcttatgaatgtagaaaatgaaacaaacatattaaaggtaattgatatactcatatttctttcttcccaagctaCATCATCATCATCATtgtgaggcttagctttactgttgtcagtgattgctctgctgctggatttcttatgaccttattcttggaagttattcacaccaa…	#N/A	#N/A	#N/A
TR32212_c2_g2	2369	p4	(CGGA)5	1579	1598	ttgtacagcccccctgatttttaacacttgtaaacattgttttaacttctttttaaactactcttttaaccttcttgcgattttgacgcgcaaccatgtctacgtccccgtgaggggtttgacattaccgtaagacagacatacagacaaacggacggacgttccaacgaatgtatatttatgttgctactctattgtcctcttgtagccacataaaaaatagccacataaaagaacggaatgaatagaatttaccgttaccattgttcttatagccaattaactacacatcggtgtgctCGGACGGACGGACGGACGGAcagacagacttctgaaatggtaaagcccgttgcaaggcaacgaaatggaatacgaagcttatacagctacgttaaagcg…	#N/A	#N/A	#N/A
TR32212_c2_g2	2369	p3	(AAC)5	1800	1814	agccacataaaagaacggaatgaatagaatttaccgttaccattgttcttatagccaattaactacacatcggtgtgctcggacggacggacggacggacagacagacttctgaaatggtaaagcccgttgcaaggcaacgaaatggaatacgaagcttatacagctacgttaaagcggtttatgtatattgtaatacaatgatgataattcaaatgaaattcaagtgaaagcaattttaaatttcatttcaatagatgtagacgcagtagcagcagcagcatgcggcggctccagtagaAACAACAACAACAACaaatataaaagccatagaaacacgacagtgacttgaatcgatatagagtttgttagtaataggctaggtggggtcaatatttta…	#N/A	#N/A	#N/A
TR43703_c0_g3	2855	p3	(TCT)5	1469	1483	ttttctgcctctgtggcgtcctcaaccatacgactgagtctatccagggcctttttcttttcctcctcgagcttagattgttcctcctgttgcaacgaggctacttcctgtcgaagtttttccagagcatgctccatctctcgtcgcaaattttccttttctgcctcttgtttttctgcaagctcttctttcagtttttgtaaactgtcctcatgttctttctgcaacaatgatgtccctttctcttgctcttcactttggagggactttattgctcctttcttctcatttcttagcttcTCTTCTTCTTCTTCTatttcccgttttatttgattcttgagtttctttaatctactttctttgtcctccagtagttccaacttagcatcctgaagttct…	PREDICTED: centrosomal protein of 164 kDa isoform X7 [Struthio camelus australis]	--	Centrosomal protein CEP164 {ECO:0000313|EMBL:AFO94483.1} OS=Callorhynchus milii (Elephant fish) PE=2 SV=1
TR17258_c2_g5	1511	p3	(AAT)5	455	469	actttactgtgtaataaatctttactgagaaatatgtctgaaatacagtgaaacccctctataacggacacctaagggactgagggaaagtgtccttaatagcggcttgtccttaattgtgggtttcaatcaagaagataacatctctgttctttaaaaaattaccgataatatcggggtgcccataatatcaagtgtccgtaatgagggtttttactgtacactattttaagttgtgctttaatgagtattctaaaagcttgatttgaaagtattgatatataaattaagaaatattcaAATAATAATAATAATaaaaaagattgtggatgttttgctgccatccacaacatgtatcataacattattattatttatttgtcattgtttccatggagt…	#N/A	#N/A	#N/A
TR28308_c0_g1	1000	p3	(GAT)5	352	366	tccaaaaagaaacgtgtgaccgaagatgaaatggaagatgacgattttgctgaggaagtagatgaattaagagatgacgatgatgactcagatagtgaagaagaagctatggatgagacagtgcaagtagattttgaagctagagtgccagatgacagtgactttaatggaatgagaacacttctgcgacagttattcctgaaagccaatgtgaatgtgtcggaactgacggatacaatcatatctcaaaactacgttggaagtgtgatgaagcaaccatacacgcctgaggatgatgacGATGATGATGATGATtccagtgatgattcagtactggccctcacaacagtcgttaatataacagaaagagagaaccttgagtgtgtgaaacagctgaag…	PREDICTED: BRCA2 and CDKN1A-interacting protein [Poecilia reticulata]	--	Protein BCCIP homolog {ECO:0000256|PIRNR:PIRNR028983} OS=Takifugu rubripes (Japanese pufferfish) PE=3 SV=1
TR25507_c50_g13	1531	p3	(TGA)5	639	653	tgcaatggattaaatcagtattatatagcaaatttacatcaacaatttacgacagactaaatagaaattccaataaactccaaaattgtacaactgacatcatacagatttacagtagattgtacaaatacacatcactactctgtaacacccagatttgttacctctttaatcaatcatcaagtttataattgttagtgttttgtaatttttgttcaatttttaagaaattgcttttgttaccatggttacccattctccagaactcttcaaaaagtttctgtcagtataatgattgatTGATGATGATGATGAcgatgatgcaataatcaaagtaacaaatatcactcaatacactgacaaaaactttgtgaacacagcatgcctttttacacacct…	PREDICTED: ADP-ribosylation factor 1-like [Cynoglossus semilaevis]	PREDICTED: Poecilia reticulata ADP-ribosylation factor 1-like (LOC103468656), mRNA	Uncharacterized protein {ECO:0000313|Ensembl:ENSXMAP00000009214} OS=Xiphophorus maculatus (Southern platyfish) PE=3 SV=1
TR36158_c2_g1	1619	p2	(AT)9	1585	1602	taaggagaggatgaaggaacacgaagcggatgtaagattgaaaagaaagaaaccagtggcagaccatttcaatgaaaaaaaacatggcattgaagatatgactgtcaaggtgttagaaaaagttttggataagggaaagtattatagacaaatcagggaactggaatggattaaaagattagagacagaggcaccaaatggaataaatgtaaagacaggtttaagtgtgttatggagggaatataagtagagatcttttggcagatggtgattgtctagtgttttatgtatgtatagatgATATATATATATATATATttcacggtgaagatggt	PREDICTED: uncharacterized protein LOC103282659 [Anolis carolinensis]	--	Uncharacterized protein {ECO:0000313|Ensembl:ENSPSIP00000000504} OS=Pelodiscus sinensis (Chinese softshell turtle) PE=4 SV=1
TR11469_c0_g1	1401	p5	(TGTTC)12	1339	1398	tgtttacttaattagtgtttttattcatcttttgatcaatttgaagcagaaccttttccccaaccttgattaaatgtcagtagtttcctaaacatgtttagggaaattaatgatattttcataaaaagaagtgagaatgatgcattgtatttcaatttttgtatatccaaaatccttcctgagaaattaaaaaaaaatgatccatgtacttagaacattggttctaattgtgtatttaccgatcatattatgtatgtaccccatgttgtatgtaatgtacctgggtgtaaaataaagtatTGTTCTGTTCTGTTCTGTTCTGTTCTGTTCTGTTCTGTTCTGTTCTGTTCTGTTCTGTTCtgt	BTB/POZ domain-containing protein KCTD7, partial [Cariama cristata]	Carassius auratus clone JE15980 microsatellite sequence	BTB/POZ domain-containing protein KCTD7 {ECO:0000313|EMBL:KFO69987.1} (Fragment) OS=Cuculus canorus (common cuckoo) PE=4 SV=1
TR33384_c1_g1	6854	p3	(CCT)5	6627	6641	aggtgtttacattctttgaccattcagtgatacactctagacagaacgtgtggtcacatgactctggggtgccaacatcctggtctcggaacctgtccagacagatgggacatctctctgtgtcctcagcatcactgtcactggcttctagaaccgcctcttcttcttcctcatcatcctcctcatcatcgtcttcatcatcctcttcctcatcactgcctacatcatcatctccttcttcatccgactcccagtcatcttcaccatcatcatcatcttcttcttccccttcctcatctcCCTCCTCCTCCTCCTcttcagatatatcttccaaaccttcttgtcttacatcttcagtatccttttctgtagtatttttatcgtcaacatttgaacttt…	PREDICTED: PHD and RING finger domain-containing protein 1 [Phaethon lepturus]	PREDICTED: Mesitornis unicolor myelin transcription factor 1 (MYT1), mRNA	Uncharacterized protein {ECO:0000313|Ensembl:ENSLACP00000013753} (Fragment) OS=Latimeria chalumnae (West Indian ocean coelacanth) PE=4 SV=2
TR23282_c1_g1	1524	c	(TGT)7tggtggtggtggtgttgttgttggtgttggtgattttggtgttgttgttgatgttgttgttggtggtggtgttggtgttgttggttg(TGT)6	1397	1522	actggaggagactggctgaatacaggagcaccgtagctactggccagaccttgactggacattataccggctgacatggatccttggctggacataattgagccagaaagtgaatttggacttgacattggaaactggccagaacctgccatctttatgactatagttgtatacacgtgcaactctatatgcctcttaatgcgttagggcataaaaatcagttcctgttacatttatatcctttttcttttacttattcaatgaaatgaaatcgtgtggtttccagatttttgcaacttgTGTTGTTGTTGTTGTTGTTGTtggtggtggtggtgttgttgttggtgttggtgattttggtgttgttgttgatgttgttgttggtggtggtgttggtgt…	PREDICTED: mediator of RNA polymerase II transcription subunit 30-like [Takifugu rubripes]	PREDICTED: Calypte anna filamin-C-like (LOC103539706), partial mRNA	Uncharacterized protein {ECO:0000313|Ensembl:ENSTRUP00000008945} (Fragment) OS=Takifugu rubripes (Japanese pufferfish) PE=4 SV=1
TR9393_c1_g1	2613	p3	(TTC)5	1154	1168	gtgtaaacacatgcttatacaaatacatgccaaacactggttatggaaaaactgtctgcttactgtagacagataatgaactggaaatgacataaatgacagtacaagtaagcctaagcaatgtaagtggtataaactctgttcaaagtttcattcattggaacctgttctctttattttatttgcatgtgaacattgaatacaaattagcttatttcattttattttttgcttttatgcgaatcaaataaaattatcagattttaaatgcttttagctagaatgccaaaacagtcagctTTCTTCTTCTTCTTCcatctctttgattgcaatctctgtgaaaaatctatgcaatgatagacttcaaacttgtcacaacacttacctcacttaacacat…	PREDICTED: vesicle transport protein GOT1B [Cynoglossus semilaevis]	PREDICTED: Picoides pubescens golgi transport 1B (GOLT1B), mRNA	Vesicle transport protein GOT1B-like protein {ECO:0000313|EMBL:AFP06845.1} OS=Callorhynchus milii (Elephant fish) PE=2 SV=1
TR22579_c0_g2	1116	p3	(CAA)7	26	46	cttttatcaacaaatacaaggtaccCAACAACAACAACAACAACAAaatggccactttgaatattttgcgcagattatcagtattaaaacaaacaaatgcaatagtttgtggagcgagtgtgacctccagagtaactagtgtgtgtccatcctgcagacttttatcaacaaatacaacatacatttacagaagagacagaagcagacagatactatccaatgttaggtcacatgtcatacaaaatgtgcggaatatgtttatacagacacaggatacaccaaatccaaactgcctcaagtttatcccgggagtgacagttctcgagtctggtactaaagatttccc	PREDICTED: NFU1 iron-sulfur cluster scaffold homolog, mitochondrial [Astyanax mexicanus]	PREDICTED: Chrysemys picta bellii NFU1 iron-sulfur cluster scaffold homolog (S. cerevisiae) (NFU1), transcript variant X1, mRNA	Uncharacterized protein {ECO:0000313|Ensembl:ENSAMXP00000003211} OS=Astyanax mexicanus (Blind cave fish) PE=4 SV=1
TR27127_c0_g1	1199	p3	(AAC)5	687	701	aaatatatacgtgaattagaacaatcaaatgacgacttagaaagagccaaaagagctactgtagtatctttagaagactttgaaggcagactcaatcaggcaatagaaaggaatgcatttttagaaagtgaactagacgaaaaggaaacattaactgaaactatacaaagactcaaagatgaagctagagatttacgacaagagattgatgtacggcaaaaaccttcatcactgccaaattcaggggcgacaactcccacaaatcctcagtcagtggagtgtcgtctccaaggcagcctaAACAACAACAACAACaccaaactgccaggcggggttgcgaaggtcgaagctaatggtacagtgaaccatgttgaccaggggggcaatactactccaaat…	Unknown (protein for MGC:145005) [Xenopus (Silurana) tropicalis]	PREDICTED: Lepisosteus oculatus nuclear distribution protein nudE-like 1-B-like (LOC102695668), mRNA	Uncharacterized protein {ECO:0000313|EMBL:AAI18698.1} OS=Xenopus tropicalis (Western clawed frog) PE=2 SV=1
TR51786_c3_g2	1627	p3	(AAC)5	1205	1219	ggtcaactgaagccgcttcatttattcttgaagaactttttttcaataaggctgctttgttattttggacaatcgttgaataagtaactgtctaatttactatccatgatttaaatttagcaatcatgtataaattaataggaaattgataatattgatatttgagggatgtaatgtttgttagtttacacttttccaagctgctttttgtgtggcttttggcgatttggtgatagtgaatatggacagacattagaagttaaatatataagcggagtatcacctacgtataatttagaaAACAACAACAACAACagtgcccgctggtaattaaaaatcagttaaacgctaatcacacctttaatagagtgaagaaaaacctttcataacagcaagcta…	#N/A	#N/A	#N/A
TR37311_c0_g1	1042	p2	(AT)8	409	424	ctttattaaaatgtttcacattaatataaaattaatcaggctatagacattatataactgtttatgctgaaataaaatactggtctatattcataaaacatagacacatccattatgatgtgcagacttgacatgtcatcacgacatgttacaattttcatgtctatgtcattacttgacactgtcaatcatgtcatgtttaatttggtgtttttttgctgttgtttttatgttgttgtctataagtttgttgttgtttatttaaggtgttgatcaattatttgagtggtgcttcataaaATATATATATATATATggttggcaatacacaaaatacttctcaaaatttgttaagggccagtttttgtagtttttgataattattgtttacgttatgat…	#N/A	#N/A	#N/A
TR23282_c2_g2	1080	c	(GTT)6(GAT)5	28	60	gttgtcatggttgtagttggacgtacaGTTGTTGTTGTTGTTGTTGATGATGATGATGATgtagttggacgttcagttgttatcgttgttgtttttgaagatgttgtgatcgttgaaacaacttgtgttccacttgtatgttggtcacagtttcgtccagtgtaatcagtctcgcatatgcaaacatatgattgaagggtcgccaagcatgttcctcgtacacatgggttcgctgtacatggatctggtacggtgattggcaaaggtgaggtcactgaaaatcctgacggtgcagtagtaacactgcaacctaaattgcatacatctgcattgcaacaatacgttccgcactttccacct	PREDICTED: mucin-2-like, partial [Xiphophorus maculatus]	Cyprinus carpio genome assembly common carp genome ,scaffold 000000143	Uncharacterized protein {ECO:0000313|Ensembl:ENSDARP00000127442} OS=Danio rerio (Zebrafish) PE=4 SV=1
TR51786_c3_g12	1627	p3	(AAC)5	1205	1219	ggtcaactgaagccgcttcatttattcttgaagaactttttttcaataaggctgctttgttattttggacaatcgttgaataagtaactgtctaatttactatccatgatttaaatttagcaatcatgtataaattaataggaaattgataatattgatatttgagggatgtaatgtttgttagtttacacttttccaagctgctttttgtgtggcttttggcgatttggtgatagtgaatatggacagacattagaagttaaatatataagcggagtatcacctacgtataatttagaaAACAACAACAACAACagtgcccgctggtaattaaaaatcagttaaacgctaatcacacctttaatagagtgaagaaaaacctttcataacagcaagcta…	#N/A	#N/A	#N/A
TR55657_c0_g1	1390	p3	(GAT)6	798	815	gttcctcttcatgctgtatgcgccgcagtcgacttttgtttgcagaaagtctgttacggtgcttccggttttgaactttttttctcctcctctggagtaagtttgtatgtttttggtgcttcgaattctactcgcaattccccgacgccttgtgaaatccgtctggtctgaattttagtccgcagttcatttttaatatcacagttaacctcacttccaggtgacttccggtcatcaagttttgatgctgcagctgcatgtttcaaagatcttaaaaatgccgacgaatccgacgacgacGATGATGATGATGATGATgacgaatattctaaaatagacgtctgcagagaatatgccggctgtgaacaattcacaggtctaaaagtttgccgttcttgc…	--	PREDICTED: Latimeria chalumnae protein PFC0760c-like (LOC102365645), mRNA	Uncharacterized protein {ECO:0000313|Ensembl:ENSGACP00000022534} OS=Gasterosteus aculeatus (Three-spined stickleback) PE=4 SV=1
TR48668_c0_g2	1241	p3	(ATA)5	314	328	ttgattatagtctttagacatataatagtaaatctgttataattcagcagaggtatcagcagcagcagtagcagcaacactaccgtggtatcattgtatttcacggggacaaattttcccacaaaggccactaaaatggcattacattatccttgtaagataaaaaatgatagtgtctctagctgtgagctattatatggttaaatttcactgggcttttgtaatgtgcaagtttcgtagaatgaaatatgcgaaaataaaaccagactgaaatataattataccacaatataatgagttATAATAATAATAATAagcatgcttgtgcagtaaatgcaccacaaatactgtatttctagggaataatgcagttcaaaaagaaatggaaggaatgtatac…	#N/A	#N/A	#N/A
TR26451_c1_g1	1415	p2	(TA)6	247	258	ggcacgtccatgccgtctgatcatgatcttcactgttcactttaagatttgttagattatttctgatcaagaagtgaacagtttagatctggaccagatgccatgggtgtgctagatgatctgtatctacactggttgttcatttgatttaagacttgtaaatggagtaaagggttgtgccaaatctgacttggaagcatttatgtttttctctttcaaaatgacgtagaagaaaatcacagacatTATATATATATAcagttgtcaagaatcgttcgtttcacattcatttcaaactgatgtaaagacatagaatcttgaacatttcagctgatgtttatttgggtaaccaaaaacagaaagattgacaggttgtattgaatgactatttaatgaaat…	#N/A	#N/A	#N/A
TR4784_c1_g2	1121	p3	(CAT)5	454	468	ggttacatatatgttaaaacatgtatatatggggagcaaaggtttaaccgtactgagatgaactaaaacagtgatagttcatctatctagagaccattacttctaactactttaaaagagacaaatgaagggattcaccagaatgcctggagaatagatgaacacttgtttcccagaaagacttgcacacagaactgtttgaaccaggcctgccatgtctccagattttatgggactttctagatctctgtatttacaagtgaaatatcccgattttgaaactgcaaaaaatcatcatcaCATCATCATCATCATtatcaacaagaacagcaacatcaaaagtaacaacagtgttccttgctgacaacatcactataaacagcagcatcaacaaaaagt…	#N/A	#N/A	#N/A
TR10449_c1_g1	1612	c	(CT)8tgcacactttatctggctctcccttgctgctgtctgcctgtctctctctatctcactcttgctcg(CT)8	1246	1342	cctgtgtacaaggactaccacggtctgttccacatcaagcagctaccgagtctgaactcattgacatgtaacatgccagaaacactggacctagcgttcaagttacgacgtaaaaagttcacgatagaaaagcttcatcttccgcccgacttgtcggacacggtcaacagggatcaggaggaccctgttgcaagactgaagcccgaggctggatgtggcattatggctgggaagaataaactggacttttgatctctgtctgactttctttcctctctctctccctctgtcgctatctcgCTCTCTCTCTCTCTCTtgcacactttatctggctctcccttgctgctgtctgcctgtctctctctatctcactcttgctcgCTCTCTCTCTCTCTCTca…	PREDICTED: elongator complex protein 4-like [Lepisosteus oculatus]	Cyprinus carpio genome assembly common carp genome ,scaffold 000001343	Uncharacterized protein {ECO:0000313|Ensembl:ENSTNIP00000016805} OS=Tetraodon nigroviridis (Spotted green pufferfish) PE=4 SV=1
TR40222_c0_g1	1310	p3	(AAC)6	73	90	ggccatcatggccctcttgtttataagttgttattttaacatgtcacactttccagcagttttgaagcaaaaAACAACAACAACAACAACaaactttcattccttggtgtaaagaattttttttctacaatattattccacctatatgcaatggcgtttctttacaagcaataacatgtatacgaaaatcatccttaggctacaatttaacggaccttgatcgacatctaaaaaacaaagttttgaacttattccgtttttcagtatttttacagcatttatttatttcaggtttcgtggcaatgaataaaaagtcctttcgagcaataaaccgagtggagtatcgtcgtacaccttccacaaccctcagagtaagcaacgaccgccgca	#N/A	#N/A	#N/A
TR41316_c0_g1	1768	p2	(AT)8	1717	1732	gatgtaaattttttacaagatattcactgtgatataaacacatcagaaccggaagaacaagcagtttacagcccattcctcctctgcacacactaatgaatgaaatgcagtatgttgatcatggggatattagcagtgcagcttgaaaagtaccagagcaataacgtaactgctagtgctcaagtccaatgatttcacaagtatgtctgccagtattgcaaccacaaatttataactacaaatttatttgaatttttctgactaaatgttacattcttgctcaataaccctttactccacATATATATATATATATgggttttaccacatgagcgaccagtgtagatccaga	--	--	--
TR19058_c0_g1	1027	p3	(CTG)5	261	275	ggctgccctaaaatgattactctggaatggtcatatggatatattccttgatatctgttcaatgcagcattctggggtttacttgcgatgctgcatggtatcgagactatcaagcctgaaggaaacgtcccaaattcgtccgagaactcttgatagctcttgtttgttacatatgagaacaaatctgacacgttgactctcttcataagatcaatcagttccatcgtattaagatagggatgttcgtcggtatcaaagtcCTGCTGCTGCTGCTGtgctatagtccgatgatcaccgtgaacatcttcggaatcttcctcaggtggcaaagcaggcagacgtttactctgttttagttctcctgtaaagccgacattttgatactcgtggtgtcctccg…	PREDICTED: carcinoembryonic antigen-related cell adhesion molecule 6-like [Poecilia formosa]	--	Uncharacterized protein {ECO:0000313|Ensembl:ENSPFOP00000028676} OS=Poecilia formosa (Amazon molly) PE=4 SV=1
TR10631_c1_g1	3095	p3	(GAG)6	274	291	gacgcacatgagtttatttatttttacttcgaccgcgttgcttgcgatttaatataaagagaatataactgttgcatttcaaattcatgaccccaacaagtagaaactatgtcacagctaaaaacgaattttgcagtgagcagcaaatatcaagcattttacacttgtggaaagattcaggtatctcgagatggattgtttatgttttgtggttgtggaaacaaggtgaacattctagaggtggcaacagggaagattcatgtctgtatcggtGAGGAGGAGGAGGAGGAGatttcaagcttctgtctaacacctaatgaccagtatttgatcttagccagccagaacttgctgctgcggcagtgggactggagagagaagaagcttgttagatcctgg…	PREDICTED: transducin beta-like protein 3-like [Lepisosteus oculatus]	Cyprinus carpio genome assembly common carp genome ,scaffold 000002268	Transducin beta-like protein 3 {ECO:0000313|EMBL:AFO95581.1} OS=Callorhynchus milii (Elephant fish) PE=2 SV=1
TR10631_c1_g1	3095	p3	(TGA)8	3006	3029	gtccagttcagatagtgaggagtcctcggagagcgagacagactttgatattgacaggaaaggtgaaaacagtaagcagactacagggctgaaagcagagaacaactctaatggtaagctagacaagaaaactgtgagagatgactctgtgagaactaacaacaagaaagtggttcaaagtgaagagagggatgaaagctccgagtcagaggacatagctgattcgctgacagcaactaacagtaaagatgatataaataacaacaatgattcagaagagagtactgaggatgatgacagTGATGATGATGATGATGATGATGAccataccactgatattgaggcctgaaaatttaaagaacactgatgtgttttgcagtacatttgcta	PREDICTED: transducin beta-like protein 3-like [Lepisosteus oculatus]	Cyprinus carpio genome assembly common carp genome ,scaffold 000002268	Transducin beta-like protein 3 {ECO:0000313|EMBL:AFO95581.1} OS=Callorhynchus milii (Elephant fish) PE=2 SV=1
TR51541_c0_g1	4486	p3	(TCA)5	65	79	taacagttaaccgccatgtcaaggtcatgtatttgatgtaattaacataggtaattcaacaatgTCATCATCATCATCActacatacgatataatcagaaactttctggttttcagcaccatagtattcagccattatagacttgtcacaggctgcacctggctgggtaccagtccccaatttcctcggactggttctcaatttacttggagatgtagctgtctttatagcaagatcagcagatttgctggacacagtctgggtagtgtgattttctggtgatgatttaacaacaatgtttccattttgaaaagaaatcttcgaagttggtatattaactgaatatgattccacgttctctgatacaggacagttcttc	PREDICTED: G2/M phase-specific E3 ubiquitin-protein ligase [Chelonia mydas]	--	Uncharacterized protein {ECO:0000313|Ensembl:ENSACAP00000015684} (Fragment) OS=Anolis carolinensis (Green anole) PE=4 SV=1
TR37100_c0_g1	1169	p3	(AAG)5	711	725	ctgagtccaaacaggggactgatcgatgtagcttacgccattgaagaagaaacgatgttttgtgtattagccaatggagatattctcaaagtacgaaccgacacaaatccctgtagagtgacggatacctggaaatgtagcgatccagagaaagaggcatgtaactgtatgttcgtgtatgaatatgtggtggatattgaacttaaaacggacacatgggccgcaataaagcgcggcgtcaccacaaaggctttacatattcctgaggagggcgtaactggtgatgatgacgatggtaaaAAGAAGAAGAAGAAGaaaaagaatattaatagaactcttctgcttggaggaaggaaagatggctacatatgtgtatatgattgggaaacaggcaaagtg…	PREDICTED: WD repeat-containing protein KIAA1875-like, partial [Chelonia mydas]	--	Uncharacterized protein {ECO:0000313|Ensembl:ENSLACP00000007663} (Fragment) OS=Latimeria chalumnae (West Indian ocean coelacanth) PE=4 SV=1
TR2189_c0_g1	2813	p3	(TCA)5	1849	1863	ttgtagctgtagtacacacacaggtccttcttcaactgtcccaggtagtcctgacgagaccttccttcaaccctccgttccttaaagtctgccaatacatgcatcacctctttgattctgtgttgtaccatcgccaaatctggggatgtagctgcttctttctctatttcctgaccactgggcagtgtgtatttctctgtctgggctatatttgtctgcaactcatcctcagccagttgcttatccctcttttcttttttcttcaacttctttgcagctttttcaactggtagcatctcgTCATCATCATCATCActgtaatcatcatcatcctcatcactgaactcatcagccatatcatcactgtcatcatcacttccctcgtctacctcctgtttc…	PREDICTED: putative ribosomal RNA methyltransferase NOP2 [Poecilia formosa]	PREDICTED: Haliaeetus leucocephalus NOP2 nucleolar protein (NOP2), mRNA	Uncharacterized protein {ECO:0000313|Ensembl:ENSXMAP00000011524} OS=Xiphophorus maculatus (Southern platyfish) PE=4 SV=1
TR2189_c0_g1	2813	p3	(TCA)8	2092	2115	tccctcttttcttttttcttcaacttctttgcagctttttcaactggtagcatctcgtcatcatcatcatcactgtaatcatcatcatcctcatcactgaactcatcagccatatcatcactgtcatcatcacttccctcgtctacctcctgtttcattttcttctgtttctgtgcaggtctcaaccaggatttgttgtcatcagtgtagcctttcacatcatcatcacaatcatcatcttcttcttcgttttcttcagcactatcatcatcttcttcttcttcgttttcttcatcactgTCATCATCATCATCATCATCATCAtccaactgttgttgccctgcaccacttgtgtcaaattcatcctgtacatcatcatcctcttcatcatcatcacta…	PREDICTED: putative ribosomal RNA methyltransferase NOP2 [Poecilia formosa]	PREDICTED: Haliaeetus leucocephalus NOP2 nucleolar protein (NOP2), mRNA	Uncharacterized protein {ECO:0000313|Ensembl:ENSXMAP00000011524} OS=Xiphophorus maculatus (Southern platyfish) PE=4 SV=1
TR2189_c0_g1	2813	p3	(TCA)6	2329	2346	tcttcttcttcgttttcttcagcactatcatcatcttcttcttcttcgttttcttcatcactgtcatcatcatcatcatcatcatcatccaactgttgttgccctgcaccacttgtgtcaaattcatcctgtacatcatcatcctcttcatcatcatcactatcatcactcatgtcactgtcgccagcatcttcattcttcatttttttaaatttgttagctgtctttactggttgcttcttgttggttgcaatggtaatcatctcttcttctccactgctctcctcctctgaaccctctTCATCATCATCATCATCAccatcatcttcatcatcgtcagtatcctcatgtttcctttttagtacggtcggctgttgtttcttccatttgttccctttc…	PREDICTED: putative ribosomal RNA methyltransferase NOP2 [Poecilia formosa]	PREDICTED: Haliaeetus leucocephalus NOP2 nucleolar protein (NOP2), mRNA	Uncharacterized protein {ECO:0000313|Ensembl:ENSXMAP00000011524} OS=Xiphophorus maculatus (Southern platyfish) PE=4 SV=1
TR28333_c1_g1	2051	p2	(GT)6	1698	1709	tgcataagtgtaacttgtacaagcacctgacgatgacaaatattgtcctgtcatcaaggttaacatctaggacgaatatattattaatcgcaattaatcgttattgcgaaacatatccgatttcaattataagatatgacatgggacattgtaacagctgttaactagcaaccgcataaatatttgtacaatctgcgaccagtgtttgtatatgggaccataaaatgaatgtctttgtctatttcgaaagatataattgcttttcaatgcttgacagagttcagtttgcaaggacgtctcGTGTGTGTGTGTtgattcaagatatttattccttgttacaaaaggtctgacatgactttgaccatacttgatttattaactgtataaataccatatcac…	#N/A	#N/A	#N/A
TR43051_c0_g1	1876	p3	(TGT)5	158	172	aataaaaggaaactttttaaacattgaccgaggatttcatgaaatgctaattggcgatgaatcgaaattgtgcagcggcaataaaatgaaataactaaaaaaacaacacaatgagctcgtggtttacaaatttacaaatatattcatattagtagtcTGTTGTTGTTGTTGTtcttcatattacgctaccatttagaactttaataaatcacccattttggaaaactgtctgttattgaaattggcattgatgtttggattcgaaagtctgtatcactattaatcatggggatgttgagactcaaaatatgatcatttagtcatacaaatgtaagagtctacttactattatcagtattgctcaagatgccggtagttttcgtcaacgttatcgccgat…	PREDICTED: complement C1q-like protein 2-like [Astyanax mexicanus]	--	Uncharacterized protein {ECO:0000313|Ensembl:ENSAMXP00000010430} (Fragment) OS=Astyanax mexicanus (Blind cave fish) PE=4 SV=1
TR29013_c0_g1	1345	p2	(TG)6	252	263	gggtgaaggctgctggaaggcagaatgtctcaacaattgttcaggtcgtggcaggtgtgtagacacagtcgctgtgccctactgttccaactgtgagaaaggctggatgggagttgattgtagtgtaccttgtggtggaatacagtcacctatggatagtggtatttgtgtgtgtgaaagcaaatgccggagccaaactgacaactgtcagctggtgtgcagtggccagggcatgtgtaattcatctgactTGTGTGTGTGTGatgacggttcaggctacaatgcaaatggctactggggcaatctatgtcagaccaaaggctgccctggcgttggcaagtcatgcagcggacatggaaaatgtgctcaaggcaaatgcatctgtgatcagggctggac…	PREDICTED: tenascin [Chrysemys picta bellii]	--	Tenascin {ECO:0000313|EMBL:EMP38097.1} OS=Chelonia mydas (Green sea-turtle) PE=4 SV=1
TR3239_c0_g1	7016	p3	(TCA)5	6962	6976	agttttgtatgtgattccacaacattttcatgttctaagtctgagtcttcaatttcacttaacctttggcttctagttctaattcttctcccactagaactttcactgtggtcactggcaacactacactgacttctagtgcgaaccatgctttcaattcccgattttctttcaaatttctttacttctataccatctgtgtctgacactccatttttatttttatcacggcttctagttctatgtgcaatttcctcttcatcatcaatcttattctcctcctcctcatcatcatcatcgTCATCATCATCATCAacaatctgatcatctgagtcaatatttatatgcatctcat	PREDICTED: small subunit processome component 20 homolog [Pelodiscus sinensis]	PREDICTED: Cynoglossus semilaevis neuropilin-1a-like (LOC103396765), mRNA	Uncharacterized protein {ECO:0000313|Ensembl:ENSPSIP00000018789} OS=Pelodiscus sinensis (Chinese softshell turtle) PE=4 SV=1
TR21711_c0_g2	2701	p3	(CTT)5	1333	1347	tggagctatcgggtgtggggtgagcacacaagcctgcagcaccctgtacagtccctgtcgacagcctgcacatgtgtaagggatgggaacttcaggggtctgctgaactaacaacaatgtctgtacaacaaatctctgtatctcctgtagtttctttcctgtcatttcacttcctgatgttgacactagccagtacagagcctttaaggcactttgaaccagtccactgtttgcatcctggtgaaccttcctctgggagctgattccctgctggtttatctcctggtacccagcaccatgCTTCTTCTTCTTCTTggaacctggctccccagctttggtggcctctctagcaagctgaagagtactggagaagggggcacaatcctgcaataggtgctg…	PREDICTED: proline-, glutamic acid- and leucine-rich protein 1-like, partial [Anolis carolinensis]	--	Uncharacterized protein {ECO:0000313|Ensembl:ENSXETP00000037530} OS=Xenopus tropicalis (Western clawed frog) PE=4 SV=1
TR48684_c0_g2	6408	p3	(TCT)5	542	556	acagatgtttttctcactcttggactggtagttttctttttactaccagttggtttaccaatctgaacactagatttaacttctaaacctttattgttttcatcagaatcaacattatcagtattgttcttaacagtttcagagtcaccaatttcaacagacacttcaacagcttttgatgatctcagagatcttgaggacttttgtgatttgcctctccctctagctccccgacctcgccctcttcctcccctttttcccctccctctgccccttcctttttgtacgagtactggttccTCTTCTTCTTCTTCTgtttctcctccatattcatcttctttgtcttcatcatccggaactgatttcggtgtagtttcacgagacctagactttgatttt…	PREDICTED: zinc finger protein 318 [Zonotrichia albicollis]	--	Uncharacterized protein {ECO:0000313|Ensembl:ENSLACP00000001605} (Fragment) OS=Latimeria chalumnae (West Indian ocean coelacanth) PE=4 SV=1
TR7327_c1_g4	1325	p2	(GT)6	211	222	tcaggggaccggtctcatatttcaggcatatgattttttgaaatgacagctgttgacatttcaaccaaatgcctgaggtttgagactggtctcctatctcagttttaaaacattgggaccagtttgttctgttatgttaatgatgtccaatgagtatgtacattttgtacattctgtgtgtttctctgtttgtccattttgtcatcataaGTGTGTGTGTGTcattttctgtgcctgtccccttcactggccaaggaaggggtttatcaaggaagtaagaaccatctatctgtatgtctgttcgtctgtttgtatgtgtaagagaggatgtgtgtggcagctgttttcaagcatgtagatcatgtcgcttacctaggcactggcatgttcaaactgtca…	PREDICTED: RNA binding protein fox-1 homolog 1-like, partial [Pelecanus crispus]	PREDICTED: Callorhinchus milii RNA binding protein, fox-1 homolog (C. elegans) 3 (rbfox3), transcript variant X13, mRNA	RNA-binding protein fox3 {ECO:0000313|EMBL:AEQ28766.1} (Fragment) OS=Gallus gallus (Chicken) PE=4 SV=1
TR8172_c0_g1	2468	p3	(ATG)8	893	916	aaaagatgaagaaagtggagacgaatgttaaagcttctgagacacttgttcataattacctgaaagacaaactaaaagataagggagttgtcagcgacaataatgatgaaagtattgaagatataatagaaaattcagagaaagtagcatcaagagaaaaacctcaggagtatgacttaacaaataaacgtcatatttttgcacggctgaaaaaaattgcttactcagaaggtggtgatagtgatggcatcgatgaagatgacattcatgaagatgataatgatgaggatgcaattgaaaATGATGATGATGATGATGATGATGggcataggaaagaggaattaaaaaacacattaaaggtcactaaacaacagaaattatcttctcttaaatctgaaa…	PREDICTED: serum response factor-binding protein 1-like isoform X1 [Astyanax mexicanus]	Zebrafish DNA sequence from clone CH211-245E21 in linkage group 5, complete sequence	Zgc:56062 protein {ECO:0000313|EMBL:AAI65299.1} OS=Danio rerio (Zebrafish) PE=2 SV=1
TR8172_c0_g1	2468	p3	(TGA)5	1212	1226	tgatgggcataggaaagaggaattaaaaaacacattaaaggtcactaaacaacagaaattatcttctcttaaatctgaaagtataaaacaaaaatcaaaccttagacaaattatgaaactctcaaaagtggttgatattaaaaacacaagtgctagctctgaagaagaggaagtcagtgatagtgagccattaattgactctgatcatgattctgaggaaaaccaaaccaacagtattggtcttgaaagtgataatagtgaagatgaaagtgataatgatggtgacagtgcagatgaaagTGATGATGATGATGAtaatgaaaatgaaagtggtgataatgatgatgatgaaattgaagatgatcatgatgaaagtgatgatgaagatgatgaaagtga…	PREDICTED: serum response factor-binding protein 1-like isoform X1 [Astyanax mexicanus]	Zebrafish DNA sequence from clone CH211-245E21 in linkage group 5, complete sequence	Zgc:56062 protein {ECO:0000313|EMBL:AAI65299.1} OS=Danio rerio (Zebrafish) PE=2 SV=1
TR35352_c0_g1	3738	p3	(ATG)5	1037	1051	gaaagactggtgctgatagagatacatttaactttggggacagaacacctacgatgcccttagaaaaattgaaagaaaaaagtgtttatgatttatccatgaatgaaagtgtgaaggttcctggaaataccttgaagaattttaaggaaaaggaaaagttaaagatccctgaccctaaaccagatgagcacatttattatctgccaatgaaaccagtcagtccagatgataaaccagcagcttccaagagtgcaaggtcacaatcaaggtcaaggtcaaagtcacaaaagaagcttgataATGATGATGATGATGattggatgcgcggaaagaaaccacgagacaggtcgaaatcgagaagtcgtaaaactgagaaagatgaggataaaacccagagaa…	PREDICTED: biorientation of chromosomes in cell division protein 1-like 1 isoform X3 [Callorhinchus milii]	--	Uncharacterized protein {ECO:0000313|EMBL:EMP36541.1} OS=Chelonia mydas (Green sea-turtle) PE=4 SV=1
TR24913_c0_g1	1285	p3	(TTG)5	1110	1124	aacaagaccgccaatcaccgttgcaccagaagttgtgacagttccggcaacagcagttataacaccaccaacgacaattgggagtgcaagtccacctgttaacaagattccagcaacaccagcagccccacccaaaatggacgttgtgtagcctgctgcctttgcaatgttcacgttttgctgcacagtgtccaactcatcagcgatatctctaagagtttggatagtccgccttcttttcgaaatccaggctcgcagtaacgcgataagctcagctgcagtttctcgtgcttcttttaaTTGTTGTTGTTGTTGatttacactagcggatgccatcttgttttctttttcctgtttacatttaaaaacacgaaaacacaaaattaaatctgagcaagt…	PREDICTED: apolipoprotein L3-like isoform X1 [Latimeria chalumnae]	--	Uncharacterized protein {ECO:0000313|Ensembl:ENSLACP00000008673} (Fragment) OS=Latimeria chalumnae (West Indian ocean coelacanth) PE=4 SV=1
TR51786_c3_g7	1608	p3	(AAC)5	1205	1219	ggtcaactgaagccgcttcatttattcttgaagaactttttttcaataaggctgctttgttattttggacaatcgttgaataagtaactgtctaatttactatccatgatttaaatttagcaatcatgtataaattaataggaaattgataatattgatatttgagggatgtaatgtttgttagtttacacttttccaagctgctttttgtgtggcttttggcgatttggtgatagtgaatatggacagacattagaagttaaatatataagcggagtatcacctacgtataatttagaaAACAACAACAACAACagtgcccgctggtaattaaaaatcagttaaacgctaatcacacctttaatagagtgaagaaaaacctttcataacagcaagcta…	#N/A	#N/A	#N/A
TR10430_c1_g1	3162	p3	(TGG)5	2028	2042	ttttcttcttgttatagcaacatttctgaccctgtttggctctagtagtgtgatagtttctttcttcttcttgagggttttaggtgtagtatcacctcccttcagaccacccagcacacctaacttaaacgtctcctcaaactcattgaaatctattactctgtagagcttctcatcatccagatcagcaaacactgtgcccttcacctgctggggcttcagtggtgtccagttcagcacaggaaggcggtatttagtctgaatcttcttcttgattgtcattgcactaggagcaccagaTGGTGGTGGTGGTGGagggggtgctccaaatcccggtgctggtggagctggagggggtggtggaggaggtggaggcatgtttggagctggaggcggagg…	PREDICTED: formin-like 2 isoform X1 [Gallus gallus]	PREDICTED: Cynoglossus semilaevis formin-like protein 1 (LOC103381677), transcript variant X4, mRNA	Uncharacterized protein {ECO:0000313|Ensembl:ENSLACP00000009660} OS=Latimeria chalumnae (West Indian ocean coelacanth) PE=4 SV=1
TR38249_c1_g1	4111	p3	(AAC)5	1679	1693	agaatcatcagtgtattggaaaaatcaaggggcggagaaaaggccgtcctagaaaatatgtcaaaccaaccaaaacctggagagcaaaactcgaaaaaactaaagctaaagaaatacagcaggaaaatgtttcggaggcttgtcctgaaaccgacggcaatatcagtgtaattactccaccagagaaacgagggcggggacgtcctcgcatacgtcctctagtcataaagaatgatcctgataaagtaaacggagctaaaattgttcagatacaacaagccactaagctagagcttcctgAACAACAACAACAACataagagacaaaaaatgcaacaacaacagcagatagacacgcctttgaaatttgaggaagacagtgcatatcatgaggtggggt…	unnamed protein product [Oncorhynchus mykiss]	PREDICTED: Takifugu rubripes SAM domain-containing protein SAMSN-1-like (LOC101063879), mRNA	Oncorhynchus mykiss genomic scaffold, scaffold_51 {ECO:0000313|EMBL:CDQ59075.1} OS=Oncorhynchus mykiss (Rainbow trout) PE=4 SV=1
TR38249_c1_g1	4111	p3	(ATG)6	1808	1825	tttcggaggcttgtcctgaaaccgacggcaatatcagtgtaattactccaccagagaaacgagggcggggacgtcctcgcatacgtcctctagtcataaagaatgatcctgataaagtaaacggagctaaaattgttcagatacaacaagccactaagctagagcttcctgaacaacaacaacaacataagagacaaaaaatgcaacaacaacagcagatagacacgcctttgaaatttgaggaagacagtgcatatcatgaggtggggttgatggagaccactgaagaggaccattatcATGATGATGATGATGATGacgatgatggtgatgatgattgtgatgatgaacacttcccccacttcagtcaagataatgagggaggagatccattgtatg…	unnamed protein product [Oncorhynchus mykiss]	PREDICTED: Takifugu rubripes SAM domain-containing protein SAMSN-1-like (LOC101063879), mRNA	Oncorhynchus mykiss genomic scaffold, scaffold_51 {ECO:0000313|EMBL:CDQ59075.1} OS=Oncorhynchus mykiss (Rainbow trout) PE=4 SV=1
TR38249_c1_g1	4111	p3	(AGC)5	3191	3205	agatccctgctgcgctgtacgaggctgctgcagcagcaagtgctcagcaggatcatcagcagcaggtggcgcagatagcagcagcatcggttagtaatatacagcagggtatgtcatcggtacatgccagcttgccgatgcactatcagattagcgagaagggatacatgttgaacacccctcatcaagaacagaatgttgtcagacaaatacaactttctcctaatgattataaacactttacacaaaacattaatggcagtatgtatataacagccgtgtctaattcaccagtgttagAGCAGCAGCAGCAGCaacatcatcagtcacaccagttgcagccaatcatgctgcaacaaacgcagcaagttgcaggccatcatcatcaaaatgttctga…	unnamed protein product [Oncorhynchus mykiss]	PREDICTED: Takifugu rubripes SAM domain-containing protein SAMSN-1-like (LOC101063879), mRNA	Oncorhynchus mykiss genomic scaffold, scaffold_51 {ECO:0000313|EMBL:CDQ59075.1} OS=Oncorhynchus mykiss (Rainbow trout) PE=4 SV=1
TR21419_c0_g1	2886	p3	(TTG)5	2360	2374	caaatttcctaaactgatccacatccagtaagatttggttttccacgggcatttccttcactaccttgttctctccaggtttcccagagtctgcagcggttgtggaagctgtagtcttgggatcgactcctccgaggcctgaggatgctgtctttacaacattttgaccaaatatgctgccaccaccgagtgttgatgttgtcagggtagaaccaaatcctgtcaaaccacccaaggtagagctggatgttgtggtagtagtgcctagcttaagtccaccagtcagaccaaatcccaaacTTGTTGTTGTTGTTGctggtattggcttagcaaagccaaaagctggtgcagctgtcgaagctgccccaaaagaggatgtccctgtggaggttgtgccac…	PREDICTED: nucleoporin p58/p45 isoform X2 [Danio rerio]	--	Uncharacterized protein {ECO:0000313|Ensembl:ENSAMXP00000008000} OS=Astyanax mexicanus (Blind cave fish) PE=4 SV=1
TR21419_c0_g1	2886	p3	(TGT)5	2589	2603	acccaaggtagagctggatgttgtggtagtagtgcctagcttaagtccaccagtcagaccaaatcccaaacttgttgttgttgttgctggtattggcttagcaaagccaaaagctggtgcagctgtcgaagctgccccaaaagaggatgtccctgtggaggttgtgccacctagactaaacccagagcttgtacctgtgctagtgctgccaagactcaaaccagagcttgttcctgtgccacctaagctgaaacccgaggatgcaggctgactcagtgaaaatcctgtaggtgcactgcaTGTTGTTGTTGTTGTaccaaacaaacttgtagttgttcctaaggcaggagcagcaagtccaaatccagtgactgcagtggtaggctgcggagctgagct…	PREDICTED: nucleoporin p58/p45 isoform X2 [Danio rerio]	--	Uncharacterized protein {ECO:0000313|Ensembl:ENSAMXP00000008000} OS=Astyanax mexicanus (Blind cave fish) PE=4 SV=1
TR56867_c2_g1	1394	p3	(ATG)6	611	628	aggacagacagacacaatgacactgaggaaaaggacaaaaaggacaattgctttgtttgcagaggtataatcatattccatgcaataaccatttttgatcagtaacagcacatttatatttcttgaaagaaaattgacatgaatggctaacaggacatttttccttaggaaataactctagataggccagtgtataatttagctgagtatctttgaaccaaaatcagcacttcttggtgttcataagtgggacaataattgatcctggacacttaataaaatacaaacacaacagttgctATGATGATGATGATGATGagcagcatcctccaccactgctatgtgactgaccagtatcactatcatcaacaacaacaacacttttacggctattcttgc…	PREDICTED: ras-related protein Rab-21 [Chrysemys picta bellii]	PREDICTED: Tyto alba RAB21, member RAS oncogene family (RAB21), partial mRNA	Ras-related protein Rab-21 {ECO:0000313|EMBL:AHH42193.1} OS=Ictalurus punctatus (Channel catfish) PE=2 SV=1
TR50608_c0_g1	2265	p3	(CAG)10	1425	1454	caggcagagttacgtgcccttgagaaagatcatgcagcattgctgacaaaggttactgtttgttgccataatgaaacctactacctggcaactgtcaaagacaatgtcttgagtgttctaactgagataatgaaggggaaagttactggtaaccctcaacagagagatttgacgaattggctgcacacaaactttgtgagcaatgaggatatgcaagcgaaactggataatctggcctcggaactcaccttcaaggtgcttgctatgatcaacgaacagtaccagaagtttgaactgacaCAGCAGCAGCAGCAGCAGCAGCAGCAGCAGgatctacagccccatcagatgcatgtcatggctaacgaatcagggattggagtggagcaggtacgagca…	PREDICTED: SUN domain-containing protein 1-like [Lepisosteus oculatus]	PREDICTED: Notothenia coriiceps uncharacterized LOC104948065 (LOC104948065), mRNA	Uncharacterized protein {ECO:0000313|Ensembl:ENSLOCP00000001901} OS=Lepisosteus oculatus (Spotted gar) PE=4 SV=1
TR29397_c2_g1	1332	p3	(TTG)8	1	24	TTGTTGTTGTTGTTGTTGTTGTTGaggatgagagggtaactgttgtggataatataccggtgcagcgtatccctctgtccctgtcatggacggcgttgtgacaatgaaaccttctctgccaccctctccacttctgaacggcagtcgtcttctttcttccaccaatcgattgcaatctttgaccaaacacggcatcctgaacgcgtctacaagccagcctactcccgcgagaccaaacgtgaagaaatacaggattccccaaacagggcggttcagataaaaatgatgggcaccgattataccaaacggaatccacaaaatata	PREDICTED: dnaJ homolog subfamily C member 22 [Larimichthys crocea]	--	Uncharacterized protein {ECO:0000313|Ensembl:ENSTRUP00000030466} OS=Takifugu rubripes (Japanese pufferfish) PE=4 SV=1
TR17584_c0_g1	1862	p3	(TGG)5	140	154	gtacatggtgaacgtcttcatctacccctctccagctgatatgaaacaagtggaaggtttatgtggagacttcgacggtaatttatacggagatctcattcacagtgatggcactgtgacttatgcttcctattactacTGGTGGTGGTGGTGGatctatgatgccaatgactttatacggtcctggggagctggctcagaaaatgccagattccagtcactaacggacatagagacgttagagaagacgctagaaagctggtacaccgatgacgttctctgtgtatgcaccggtaacaatggcgacggagaagtgaagtgttctgctaatgaaagagaaacctgtctatcgccgaaacagaccgatggagtggaggtgtctatttccaaacgtcataa…	PREDICTED: von Willebrand factor D and EGF domain-containing protein [Chrysemys picta bellii]	--	von Willebrand factor D and EGF domain-containing protein {ECO:0000313|EMBL:KFW78977.1} (Fragment) OS=Manacus vitellinus (golden-collared manakin) PE=4 SV=1
TR21088_c0_g2	2518	c	(A)12gattagaaaagcgacaaaacatgttcaaagagttaaatgtttatatgatactgaagtcaaaatgaatgatagtgtgactgg(A)10	18	120	aacgttttctgcaaaatAAAAAAAAAAAAgattagaaaagcgacaaaacatgttcaaagagttaaatgtttatatgatactgaagtcaaaatgaatgatagtgtgactggAAAAAAAAAAcaagatggagatgaaggtaactttcttactttcaaactgagctatttgtcaaaaatatactgtgacccttgcaaagatgctggagaagatcatgaagcccatggattttgtgtggagtgccaagattatctgtgtgaaaactgctacaactgtcactgtgtacccagacctaccaaacatcatcagttactcaaccaaaatgacatgccagataggaaagttgaatgtgactataaggatctgtgtcatatccatgagggagcagcgaataaatactac…	PREDICTED: E3 ubiquitin-protein ligase TRIM56-like [Pelodiscus sinensis]	--	Uncharacterized protein {ECO:0000313|Ensembl:ENSPSIP00000001670} OS=Pelodiscus sinensis (Chinese softshell turtle) PE=4 SV=1
TR45839_c1_g1	1206	p3	(ATG)18	853	906	ggtgtgattgcgctcaccaaaactgctgccatggagctggctaaggaaggtatccgagtcaatgctattttaccaggattcacagtgacccctatgaccgatgttgtcccagataaagtcaaacaatttgttacatctatgatcccacttggcagaatgggaaaaccagaagaaattgcggaagcatgtttatttctggcatcggagagaagtagttacatcacagggaccactctagaagttgcaggaggactatttgcataaaactatgaggaaatccattcacaatattaccaacgtATGATGATGATGATGATGATGATGATGATGATGATGATGATGATGATGATGATGtgccatttgcaaagcaatatgtgatagagttaacattctactgta…	estradiol 17-beta-dehydrogenase 8 [Danio rerio]	TPA_asm: Oryzias latipes strain Hd-rR, complete genome assembly, chromosome 23	Hsd17b8 protein {ECO:0000313|EMBL:AAH93373.1} OS=Danio rerio (Zebrafish) PE=2 SV=1
TR57310_c0_g1	8521	p3	(TGT)5	1831	1845	ggcaacatgacctgatcagagttcatttgattatagtctgcacttgcaccctgcatatttggatgcggcgactgatttggaggtatgtgatggggtgacatttggggttgacggggtgacggattgagctgttgacgaggcgatggggtgggttgtggcgagcggactgtctgatgtagtgatgatgatggaggtgacctcacttgctgcattatgttcgagttaacactttgttgagaaagcatttgctgcggacttacaggctgtccacctgcaaccccagccatctgttgcttcaacTGTTGTTGTTGTTGTtgaacttgctgcatcatttgatggtttgggttctgatactgctgcatgccatcgttctgaaacctttgctgcccatatggcggc…	PREDICTED: CREB-binding protein isoform X1 [Melopsittacus undulatus]	PREDICTED: Melopsittacus undulatus E1A binding protein p300 (EP300), mRNA	Uncharacterized protein {ECO:0000313|Ensembl:ENSLOCP00000003190} OS=Lepisosteus oculatus (Spotted gar) PE=4 SV=1
TR27208_c0_g1	1339	p2	(AG)23	1293	1338	cccggattctgctccggtacaggatatgttacaagcctatatgttgttaccaaagtttacgaaatatcagcaaacataccttttttccatcttgaagacgtttacgtttcattatgtatcaaacaactaggctttcatcttgaacgtgttttaggattccatgtcgatcgcccagagcttgacccctgtgcttaccatggtaaaagattgatcacttcgcatcaaatgtcgccagagatgatcaggcaggtttggcaaaaaaaatgttcgacacctgattgatgatatttagagacacacAGAGAGAGAGAGAGAGAGAGAGAGAGAGAGAGAGAGAGAGAGAGAGa	PREDICTED: beta-1,3-galactosyltransferase 1-like isoform X1 [Oreochromis niloticus]	Cyprinus carpio genome assembly common carp genome ,scaffold 000002942	Uncharacterized protein {ECO:0000313|Ensembl:ENSONIP00000026316} OS=Oreochromis niloticus (Nile tilapia) PE=4 SV=1
TR25507_c50_g10	1530	p3	(TGA)5	638	652	tgcaatggattaaatcagtattatatagcaaatttacatcaacaatttacgacagactaaatagaaattccaataaactccaaaattgtacaactgacatcatacagatttacagtagattgtacaaatacacatcactactctgtaacacccagatttgttacctctttaatcaatcatcaagtttataattgttagtgttttgtaatttttgttcaatttttaagaaattgcttttgttaccatggttacccattctccagaactcttcaaaaagtttctgtcagtataatgattgatTGATGATGATGATGAcgatgatgcaataatcaaagtaacaaatatcactcaatacactgacaaaaactttgtgaacacagcatgcctttttacacacct…	PREDICTED: ADP-ribosylation factor 1-like [Cynoglossus semilaevis]	PREDICTED: Poecilia reticulata ADP-ribosylation factor 1-like (LOC103468656), mRNA	Uncharacterized protein {ECO:0000313|Ensembl:ENSXMAP00000009214} OS=Xiphophorus maculatus (Southern platyfish) PE=3 SV=1
TR23792_c1_g1	2165	c	(TGA)6tgg(TGA)6	435	473	acaaaggaaaccagtgtcaaagagaaaaagaagcggtcaaggtgctaatgaagagcagtgtgtaagttcaccaaaaaaacagagcagaataaattgtgcagagaatttaagttctaattctgaattacaggtgaagttaaataaatattcagacctttcaaagactaaaaagagcaagagaaacaccgattcaataggaatggatgtattacagtctggcagtgaggacagcagtgattctgataaagatacaagaataatacagtcaaactcggggagaaaactgcatgaagaaaacagTGATGATGATGATGATGAtggTGATGATGATGATGATGAagatgatgatgatgacaatgactacttggaggaggcgaaaagcaagagtgtagaaacagt…	PREDICTED: ribosomal RNA processing protein 36 homolog [Latimeria chalumnae]	TPA_asm: Oryzias latipes strain Hd-rR, complete genome assembly, chromosome 13	Uncharacterized protein {ECO:0000313|Ensembl:ENSGACP00000025913} OS=Gasterosteus aculeatus (Three-spined stickleback) PE=4 SV=1
TR31982_c1_g1	7056	p3	(GTT)5	5046	5060	tcccgccattttaaggagaaatatcagacgccataccacgcgtttgatgtggttgcaagccaaaatctaactgaattctaaatttgtagtaaaaacagatctgtacataaatttgatttttagaaatgttacaacccaataatataattgttttagcgaaaaccatcaaatatcatgctgctgaatattactgcattcacagtgatgagactgttaaaataatacatgtattaccattttgtaaaataatattaacagttttgtaattttccattttgagaaaacagtttgctaatgttaGTTGTTGTTGTTGTTatgtagattcctccttttattcatgggattagtcctctttattctaggatagtttattcactattccagattttttttacacta…	PREDICTED: ubiquitin-like modifier-activating enzyme 1-like isoform X1 [Python bivittatus]	PREDICTED: Notothenia coriiceps ubiquitin-like modifier activating enzyme 1 (uba1), transcript variant X4, mRNA	Ubiquitin-like modifier activating enzyme 1 {ECO:0000313|EMBL:JAA95090.1} OS=Crotalus horridus (Timber rattlesnake) PE=2 SV=1
TR23090_c0_g1	1190	p3	(CAT)9	1116	1142	cttcatgctggatttaaatgacattgcccctactggagaacaaacccgtagggtgacagccccgtgccatgctatgtaaattacgctacatgtacctattgagctaaagattgatcggataaacaaaaaaaacacaattatactggtatataactgtattattatataaaatatataattgtgtataaccaccaccatattcattatcatcaccatcatcaacatcatagttatcatcagctgcagtagcagcatcatcattatcatcatctgcagcagcaccagtagcattattatcagCATCATCATCATCATCATCATCATCATtatcatcttcaatcattatcatcaataggatctaattgaagtatagat	unnamed protein product, partial [Tetraodon nigroviridis]	Erythrura gouldiae microsatellite DNA locus GFL56E09	Chromosome undetermined SCAF5157, whole genome shotgun sequence {ECO:0000313|EMBL:CAF88611.1} (Fragment) OS=Tetraodon nigroviridis (Spotted green pufferfish) PE=4 SV=1
TR33177_c0_g1	3175	p3	(GCT)5	1612	1626	gctgccggttctcttcaagtatcgtgtctaagtctgtttggctgtcaagctggccacctccagtggccccgccagtttcgctctctccatgtctgtccttcatgtccagtatggtgttaatgatgctctcgacactggggctcttctctccttttctttcaagttctgccctggctgagatcacgtctatttcggcaatagaaaagcccatttcagcggcgcttcgaataacggctgcagtaagtgagctcggtgttatggttagtctgtccatcgtcagatcagtagaagcttggattgGCTGCTGCTGCTGCTgttctcttacctgagaacttcccgaacctgtgcgcgtctgactgtttcttgatcgctgaagcccttcaatgtatgcagctccct…	PREDICTED: baculoviral IAP repeat-containing protein 7-A-like [Lepisosteus oculatus]	--	Uncharacterized protein {ECO:0000313|Ensembl:ENSGACP00000003419} OS=Gasterosteus aculeatus (Three-spined stickleback) PE=4 SV=1
TR17335_c0_g12	9722	p3	(TCA)5	8590	8604	ggtggtggctggccaccatacttggccttgaagcgggaaaacaatgtgtagttctggagagttgctggtggttttgtcagatctggtacttcaccaaaatgcttctctttccaatgtttatttagcgattttctccacttgtacacattgccacacttggagcatgcatatttcacacctacatcatcaacaacttcatagtacttcaatggatcaacttcctgtcggattcttttctttttctccattggtgccccggccgatcctggtgcagacgtcaaggtcaccatactagtatctTCATCATCATCATCAtccatgaaaccatcttcatccatatcatcgtcaccattcatatggtcatttatggaactgctatctctcattaatccattcgca…	PREDICTED: zinc finger protein 91-like [Callorhinchus milii]	--	Uncharacterized protein {ECO:0000313|EMBL:EMP40055.1} OS=Chelonia mydas (Green sea-turtle) PE=4 SV=1
TR38304_c0_g1	5278	p3	(GAT)5	2524	2538	attgataaagtagtttcaacaaatgagaaaagtgatagaaaatttgaatacaacagtgatagtgatggtggaaaaagtgaaatgttaaagaataatgtagcattaaacaaggttaataaaacagtattgaagaagatttcaaaagtaaattcagaaaaacctggtgaaatattggaaattcagaaagttgattctgtttccaaactttcaaaagagagtgtaaaagataaacacaactgttacaatgctgctgctgttgctaaaatagattctggagctgttgatgaagatgatgatgaaGATGATGATGATGATgaagagaaggtggtggaaaatgaaagtgacagttctgatgcagaagatatggacacaagtgacaatgactcatcagataatgaa…	PREDICTED: nucleolar protein 8 isoform X2 [Stegastes partitus]	Zebrafish DNA sequence from clone CH1073-450F2 in linkage group 18, complete sequence	Uncharacterized protein {ECO:0000313|Ensembl:ENSPFOP00000025206} (Fragment) OS=Poecilia formosa (Amazon molly) PE=4 SV=1
TR38304_c0_g1	5278	p3	(TGA)6	2910	2927	atcagataatgaaagtgacagcagtgatgatttcaaagcactggttagccaagcagttcaggaagtacagggtttagataacaccgttggtaaaagcaaatctgatctaaaacaggataatgtaacttattcaaacccaggcagtttaagtggtgaaaaaatacttactggtactgatagttcactgtcacctcagagtcttagagagacgatcaatgtatctaaaacgagcaacattataacagttgatgataaagttaaacaccaggaaaaatcaattgatgatgaggatgatactagTGATGATGATGATGATGAcagtgatgatgatgacaataacagtgatgatgcaagtgatgatgagaatattaaagagaataaaggaaaaacacattcaaa…	PREDICTED: nucleolar protein 8 isoform X2 [Stegastes partitus]	Zebrafish DNA sequence from clone CH1073-450F2 in linkage group 18, complete sequence	Uncharacterized protein {ECO:0000313|Ensembl:ENSPFOP00000025206} (Fragment) OS=Poecilia formosa (Amazon molly) PE=4 SV=1
TR38304_c0_g1	5278	p3	(TGA)6	3144	3161	cattataacagttgatgataaagttaaacaccaggaaaaatcaattgatgatgaggatgatactagtgatgatgatgatgatgacagtgatgatgatgacaataacagtgatgatgcaagtgatgatgagaatattaaagagaataaaggaaaaacacattcaaatgaaagaagcacagtgacaattacttcagcatgggacaaaagctcagcaaaaaaaagcaacaattttgaatttaaaccattgagtaaacaaacaaaagttgaaagtttagaagatgaagacagctctgattctccTGATGATGATGATGATGAtaataaaaacagtggccatcaggaggacgtttgcgtcactgaaagcttagaatcagagaaaagtgttcagaaaaaaaatga…	PREDICTED: nucleolar protein 8 isoform X2 [Stegastes partitus]	Zebrafish DNA sequence from clone CH1073-450F2 in linkage group 18, complete sequence	Uncharacterized protein {ECO:0000313|Ensembl:ENSPFOP00000025206} (Fragment) OS=Poecilia formosa (Amazon molly) PE=4 SV=1
TR51431_c0_g1	1892	p3	(CTG)5	1161	1175	ttggtgcatgtaagggtactgttgacctggcatgaacggatactgtggaaacatcatgttcggcatgggaaatccctgtggaacagccggaaactgttgaaactgtgccatcatgttgccatgtccctggttcactggtgatattgttctctgaccttgaacaagggctggattttgtggtgagtgtccttgttggtttggatcagcctggctgactcttgaagaggtttctgactgaggtgggatttgtatcacagggttcatggacagagcactctgggatgacgctgatggtatcctCTGCTGCTGCTGCTGaaaaccaaaccctagtgctccccgagtagcctccatgctgctctgtccgtgagctgtgtatccctgagacatgccggagtcccc…	PREDICTED: dr1-associated corepressor [Poecilia formosa]	PREDICTED: Esox lucius DR1-associated protein 1 (negative cofactor 2 alpha) (drap1), mRNA	Uncharacterized protein {ECO:0000313|Ensembl:ENSPFOP00000009822} OS=Poecilia formosa (Amazon molly) PE=4 SV=2
TR38479_c2_g1	1340	p2	(TA)6	265	276	aaagttgtcagcggtagtccacactcgggaagtgatgattcaacaaaagttgtcagcggtagtccacactcgggaagtgatgattcaacaaaagttgtcagcggtagtccacaggaaagttcggatgaagataacgacaagtttttttgttttttttttgtaattatttttattttcagaaaggttatttatcataatcacagcacatcaatacataattatgttctttacattactgcaaagtacatgagaacttagtctaacTATATATATATAggatatatcattacattgtattgtctgacctgaagagaagaccacctcagggaaattccatttttgcttttctgtgctggatattttactttaagcaaacacctacttcatttttgcaaaact…	#N/A	#N/A	#N/A
TR45839_c1_g2	1209	p3	(ATG)19	853	909	ggtgtgattgcgctcaccaaaactgctgccatggagctggctaaggaaggtatccgagtcaatgctattttaccaggattcacagtgacccctatgaccgatgttgtcccagataaagtcaaacaatttgttacatctatgatcccacttggcagaatgggaaaaccagaagaaattgcggaagcatgtttatttctggcatcggagagaagtagttacatcacagggaccactctagaagttgcaggaggactatttgcataaaactatgaggaaatccattcacaatattaccaacgtATGATGATGATGATGATGATGATGATGATGATGATGATGATGATGATGATGATGATGtgccatttgcaaagcaatatgtgatagagttaacattctact…	estradiol 17-beta-dehydrogenase 8 [Danio rerio]	TPA_asm: Oryzias latipes strain Hd-rR, complete genome assembly, chromosome 23	Hsd17b8 protein {ECO:0000313|EMBL:AAH93373.1} OS=Danio rerio (Zebrafish) PE=2 SV=1
TR48118_c1_g2	2574	c	(GTT)5ggggta(GTT)8	1921	1965	gatgaagccaatttttgtgcaagagggctattgtccggactggcggcgatggtgatcttgtccgcaggaatgatgaatggttcactcattccatccagttcttgacaaggatatccgcgggtggttgttgaaatactactagttgttgacagagacgttcttgtcggggtagttgttggagatgttggtgttgttgttggagttgttgtaggcgttgttgttgaagtggttgtggtcggcgtagtagttgttgacgtggttgttgtgggcgtagttgttgtcggcgtagtagttgtttgaGTTGTTGTTGTTGTTggggtaGTTGTTGTTGTTGTTGTTGTTGTTgacagtgttgttgttgctgtcgtcgttgtcgttggttttgttgttgtagttgtc…	PREDICTED: mucin-2-like [Alligator sinensis]	Sardinella brasiliensis microsatellite Sver22 sequence	Uncharacterized protein {ECO:0000313|Ensembl:ENSAMXP00000003966} OS=Astyanax mexicanus (Blind cave fish) PE=4 SV=1
TR58384_c0_g1	1047	p2	(TA)7	225	238	ctggttccattgtcagttttatgatattggggcctgattggttaaatttggactcaagtctcaaaactgaccaatcacaagccagagttttgaaacttgtctgccatttcagtttaatgattaagatagtgcacacatttgtagttttaagtttgactatttttagcactaacatacagtataatgtgcatcgattcaataaaatgtgggattcacatgatgtgTATATATATATATAtcacttggttttgtgtatatattatctgtttcatacatgaatgttatgtaaatattatattttacactacatttatttttaatgacatcaaaatgttttaaatttcatttttcttgacctaatgcacaacttatttcacaaatgcaactagagttgacccg…	#N/A	#N/A	#N/A
TR23886_c2_g1	5692	p2	(GA)6	4642	4653	cactcagacacaccagaggcttgaactcaaagaaaagcagctgggagagctctctgacgccatgcagacgtataatccaaaggatgagatcaagaaaaaatatgcagaggaagctcgactggctgcgctcgaggcaaagaggttccgagatgaggttctgcacagaatgcaggacgagtttgagaagagaaagagagaagaggaggagagggaagcagagaagaagagaaatatggaggaacattacaggagactacagaaggagctagaagacgaacacgcccgtgaggaacagagactGAGAGAGAGAGAagaggagaaacaacgtctgagacagagacaacttgaggagagaaagaagaacgaagaagatcagatccgcaagtcaaacctcagcga…	PREDICTED: uncharacterized protein LOC102690570 [Lepisosteus oculatus]	--	Uncharacterized protein {ECO:0000313|Ensembl:ENSLOCP00000007234} (Fragment) OS=Lepisosteus oculatus (Spotted gar) PE=4 SV=1
TR54389_c0_g1	1171	p3	(ATT)5	216	230	aatggcaaccagtcacaatttcagccaatcagatgctcgagatttaagactggtttgcaatctcagccttataaccttcagcccaggtgtacttaaaggtaactacatctacagctacggtaaaccaacaaatattcaggaccaataaatttttgttctattccctctgaaatgcaaaaattaaaatgcacgaatattcctgcaggatttatgaaATTATTATTATTATTcataaattagaaacccctaaaaagacattcacgaatatgtccaaccatgacaaaacacgagaatttatatgcatgaatattcattaatttacagtatgctacatgtatatggaaatttaaacctcaaaggtaaaatgactaattttattggtcatcatacaaatgttaa…	#N/A	#N/A	#N/A
TR33474_c0_g1	1850	p3	(TTG)5	1732	1746	gaagaccagcagctattactgtacaaccatcgagaatcttgtgcttattgctttcttcttgacaaaagtagcaccagaacttggcctctctctcaaatgtttcaccatgaacagttgggttaaacaaacttgtctttgctttgtggatctttctagtgaatttttctatagttttttgtaagatatttttgtggcgttgtgaatatacgtgtttctttcctcttttatgacttaatctacacagagagcaaaactgaaactgaacaaacgtagttttctgttcatttgccgccattgttaTTGTTGTTGTTGTTGttagaaaactctgaccagacccagaccagactacggaattagacgatcctgaggatagtcgattccaatatcgtctctaacata…	PREDICTED: coiled-coil domain-containing protein 84 [Notothenia coriiceps]	--	Coiled-coil domain-containing protein 84 {ECO:0000313|EMBL:AHH41796.1} OS=Ictalurus punctatus (Channel catfish) PE=2 SV=1
TR54529_c0_g1	1024	p3	(TGT)5	18	32	gttgttgtcgtcgatggTGTTGTTGTTGTTGTagttgttgttgtggtcgtttcgagctggagataacaaaagcgacggaagccaagtttgttacggaatgctcctgacagaaaactgggttttaacaaggcgatcatgttcaaatgcattcataccagccaacacgtcagatgcaatcgtgaaagttggaagaaaagattcacgggctattgctgtcaatattgatcactactctgattcttatgccccagattttgatttaagattggtaagacttacatctaaaagtaaacctgatgcatatcagctaccttgtattttgacgcacatac	--	Epinephelus coioides x Epinephelus lanceolatus microsatellite ECELS01 sequence	--
TR25451_c2_g1	3422	p3	(CAA)7	1239	1259	ctacagcttcagcagttgaaccggcggttccagcgaactcagtacctagccttgccagaacgagccgagctagccgcgtcactgggtctcacacaaacacaggtgaagatatggtttcaaaacagacggtcaaagtacaagaaaattatgaagcagagtcctgggtctacacctaatcagatgtctctaggaaactccggttccgtgacccctcagccacaacagcagtcacaaggctcgccgccgcctccatcccattccgctgacatcccgacctcacagcacggcccaggccctcatCAACAACAACAACAACAACAAcacaacagtgttcccaatggacatcatcattccatgatgcctccacaatcttcttccgtgtctccgcaaccggaaatg…	PREDICTED: homeobox protein Dlx4b-like [Latimeria chalumnae]	PREDICTED: Danio rerio distal-less homeobox 1a (dlx1a), transcript variant X2, mRNA	Uncharacterized protein {ECO:0000313|Ensembl:ENSLACP00000016087} (Fragment) OS=Latimeria chalumnae (West Indian ocean coelacanth) PE=4 SV=1
TR23229_c0_g1	5145	p3	(GCT)5	845	859	cattgtacttaaatggcaggtctaacccccaatgtgggaacaagtatacggttacctacaacaatggggccatgtgaggcggctgcagcaacagcctggttgtgggcttgaatagcctgagcctgttggaattgctggatttgttgaagttgttgtagttgctgtatctgctgtatttgctgaagttgttgaagagaagctgaggtcatgaccattcctccaccaaggtgagcaggtgtggctataacatggtgaccggaatatggaacttgatgtaacagatgagctggatgagctccaGCTGCTGCTGCTGCTgcactggccataatggcaccctgagacacagcagcaaccatcggctgaccagcctggataggtataccagcttggacataatga…	hypothetical protein UY3_06274 [Chelonia mydas]	--	Uncharacterized protein {ECO:0000313|EMBL:EMP36541.1} OS=Chelonia mydas (Green sea-turtle) PE=4 SV=1
TR41257_c0_g1	6812	p3	(CAT)5	6088	6102	tctttttcctttttctctttctcttttccccagtatcctctccagcttcccccttcttctttctctttcttttcttcttctctggtttatcagaattatcttccgtagtttgttcaccaacacttggaccatcacctgcaccagagctggggccaccaacctcggaggattcttgaacttctgacccctcatcctctccttcaagtcccatatcgttatcaaagtcagcaagggagttgagcgcctcattgacatcctcatcttcactttcctcatccgactcatccccatcactctcagCATCATCATCATCATcgtcctcgtcatcttcttcttcatcctcttcttcttcctcataatcttcatctcctgggtcttctggctcatactgctctgaga…	PREDICTED: helicase ARIP4-like [Esox lucius]	PREDICTED: Cynoglossus semilaevis helicase ARIP4-like (LOC103385032), mRNA	Helicase ARIP4 {ECO:0000313|EMBL:AHH39405.1} OS=Ictalurus punctatus (Channel catfish) PE=2 SV=1
TR40231_c0_g1	1986	p3	(GAT)5	650	664	gcatctagtggggctcagaccacaccctcagaaccatctggggctccaccagcaccaccagccccaggtgctcctgcaccgcctgctgctgagagcgccgctcctccaccgcccccggcagaagaggaaaaaccctccaacccagtgtccaaagatcctagatacatgaagtatttcaaaatggttcaagtgggtgtacctgagcaagttgttaagatgaagatgtcggcagaaggtgttaatccagatatattagacaacccagatgcaccagcacctgcagctggagccagtaaaaaaGATGATGATGATGATgacgattttagtgacagcagtaacgaccaatcagatgacagtgatttcgattgatttctgccaacatgttattagttattaaaa…	PREDICTED: WASH complex subunit CCDC53 [Larimichthys crocea]	--	Uncharacterized protein {ECO:0000313|Ensembl:ENSAMXP00000007523} OS=Astyanax mexicanus (Blind cave fish) PE=4 SV=1
TR40721_c0_g1	1663	p4	(GACG)6	1	24	GACGGACGGACGGACGGACGGACGtacggacggacggaaagacggacggacggttcaatcactagatgccgggggcataaaaaaacaattgcatgtagttttcatacagacaccgagaaaaactcatggcacctatacaaacactttgcaattatagtgaacgtgcacatacatttcatttatttccattcattttactagctataacatctatacaacataaaaagagagtatcattaaaatggcatacaagtacatttacacatatttttgagcaaagttatacaaatttgatattgctatgttctcgtgaatgagtaatga	PREDICTED: calmodulin-like [Cynoglossus semilaevis]	Zebrafish DNA sequence from clone CH73-52D20 in linkage group 16, complete sequence	Calmodulin {ECO:0000313|EMBL:BAB32439.1} (Fragment) OS=Mauremys japonica (Japanese pond turtle) PE=2 SV=1
TR44546_c0_g2	1693	p3	(TGT)8	1660	1683	aaaccgtgatctcttgatgtttaccagactgatgtctgtaaaccgtgatggatgattttatgacaagatcagaggtaattatcacctaaaactgcccaaacgagccccaattttggaaatcttgcatccggcccttggttgtaacttagatggctaatgcttatatatttaaggcatgtgccatgaggcatgtgttatatttagccagattaccggtaatattgaagatgaggtcagtccatattcagcagtattggccaaaactggatgctcggctggtaaaagaccgagtgactgccaTGTTGTTGTTGTTGTTGTTGTTGTtcaatactag	PREDICTED: carbohydrate sulfotransferase 11-like [Cynoglossus semilaevis]	--	Uncharacterized protein {ECO:0000313|Ensembl:ENSXMAP00000001341} OS=Xiphophorus maculatus (Southern platyfish) PE=4 SV=1
TR24683_c0_g1	1091	p5	(TACAA)5	1064	1088	tcttcgtaatcactaatcttgttttttttctttacatttaaaatggactataagtaaagtgaatatggtgtattaatgacaaatcagaataaactgttggtaaatctcttgctcggtagctttcaaagtttcctttttcattgttacagaagcacattttgttccgtgtggcagctataaaatgtattcccgtacatttaatcacagatgatatcagttacgatctttgaatgtcgttgagtaagaaacaaatttatgttcaatgaccctgtttaacatgtccaagcaagaagtttgcatTACAATACAATACAATACAATACAAtac	--	Zebrafish DNA sequence from clone CH211-130N22 in linkage group 10, complete sequence	--
TR15086_c0_g1	1202	c	(T)10aaataattttggacccttgataatgtattagttaaattaaaataaaaaaaaatgcacaaatttcacttaagtcttaa(T)10	124	220	gttatctctgaccaatgcagatccagatcagacagatgtgctggctgatctggatctacactagtcacacatggataaaaatgcatatttatggaggaaagggttaagactggttaccagttgTTTTTTTTTTaaataattttggacccttgataatgtattagttaaattaaaataaaaaaaaatgcacaaatttcacttaagtcttaaTTTTTTTTTTcacttttgtgttttatccttaggatgcatacaagtggcacaaatgtaggttagttaacaacactaaaatgctttatatacaatatatacagaatccgaaactttctacattaaagagatcaatttgaaaactggtaagatgtgcataaaactttggttataagcactgtttgtatctaa…	#N/A	#N/A	#N/A
TR7639_c0_g1	1463	p3	(GTT)5	525	539	cattgttggtaagtcataggttcacctgacacccatccaaaccggcctgtgtccattaactttccacccacccaatagttttctctatattgtacggtataatttagtaggtaaccgttttcctcagcagtattgatagtagccaaattacttccccattctcggcaccaattctgtgcatcaaaccagctttgtttagaatgaaagatgagataacaacttaactcgaacgaaccccaccctgatggacatgtcggtacttgtcgtatagttgtcgtcattgttgtagttggatgtacaGTTGTTGTTGTTGTTtttgttgttgcagctgctgctgcttacgctgctcttggtgctgtcgtttctgctgctctatctgcttctgttgattctgctgtt…	unnamed protein product [Oncorhynchus mykiss]	PREDICTED: Notothenia coriiceps leukocyte receptor cluster (LRC) member 8 (leng8), mRNA	Oncorhynchus mykiss genomic scaffold, scaffold_912 {ECO:0000313|EMBL:CDQ76912.1} OS=Oncorhynchus mykiss (Rainbow trout) PE=4 SV=1
TR27622_c0_g1	1467	p3	(CAG)7	689	709	gccatgagcatgcagaacggacaacctttccaacagatagttattcagcaaccacagggtcagctcctatctcaaccccagatcctcaacccccagaacctggcacagttcacaggaccttttccacagattatacagacccctgatggtcagatgattctttatcagcagcctcagcaaatccaaactaaccaaatgccaacctccactgatgctaatggacaacagcagcaacaacaacagttacaacagactcaacaaaaccaattacaagccaatggtgtggtatctgatcagattCAGCAGCAGCAGCAGCAGCAGgttacaccacagttcatacagcttcctaacggacaactcatgcaggttgtgaaccccggcagtttaaaccttccgcag…	PREDICTED: nuclear transcription factor Y subunit alpha-like isoform X3 [Latimeria chalumnae]	Danio rerio zgc:92567, mRNA (cDNA clone MGC:113895 IMAGE:3820316), complete cds	Uncharacterized protein {ECO:0000313|Ensembl:ENSGACP00000010447} OS=Gasterosteus aculeatus (Three-spined stickleback) PE=4 SV=1
TR18210_c0_g1	1944	p2	(TA)6	1827	1838	aaaaacctaaatcgtgcgttatcaaaacacccaaaatctttatctacatgtaagatttttgcacccacttgaataacacaaataatgacagaaaggttagaggttctttatcagtagttgtacgaacagtaatagaacaaattaacatgaattatgtacaatagatgcgcaccggcaagcttcagttatcttctgtccccaaaatgataatattcaatcgacatgcaaataattttatgcagggattttgcgaacctataacataaagcacaactcattcttgggaagaaaacatgaaatTATATATATATAagtattgtgagacaatgttgagtttgagtataaggccgaagaaaatactggtcatcattagtgtcgcgtcattattcgtctcgcggt…	--	--	--
TR29812_c0_g2	1180	p4	(ATAC)5	279	298	ggttatctctgaataaaatgcgaacagtgcagatcctgatcagatggcacggatgtgctggctgatctggatctacactggtcgaacatgcgtaaaaatgtgtatttatggagaaaagggttaaccaataaactatctgatttacatgggtcattcattaatcacaataaaatcttttctacaattcctttagcaatgaaagatggcataacattcaatcttgttcatgatttcttaagcaaaatgggatttgcaaaatatgtacacaaggaaaaataATACATACATACATACATACaaattgcaagaacggtttatacaaaaacattacaaaaatttgatatgtaaatagacctatagcactgatacaaaactctggaaatacagctgacagtatga…	#N/A	#N/A	#N/A
TR36749_c0_g1	1057	c	(T)10gtttatatcataataaca(T)10	1012	1049	tcaaacataatcttgtgttcagcttaaatctgccatttggagttatcatataaatactaggaggtttgaaggggaattccctgggaaataccagctttccatggtatgtaccaccttcgtaagggctgttttcaggtccagtgactacatagtgccattctaaaatatttgatggtaagggcactgccttcacatagggaacaggatcttttatgattctaagataatcctggcgcaaccttgcagttgctgtggtattaacacgctttgctgatgacatctttattaagaatatttagcTTTTTTTTTTgtttatatcataataacaTTTTTTTTTTcaaaacag	PREDICTED: ubiquitin-conjugating enzyme E2 J2 [Callorhinchus milii]	PREDICTED: Pundamilia nyererei ubiquitin-conjugating enzyme E2 J2-like (LOC102203247), transcript variant X3, mRNA	Ubiquitin-conjugating enzyme E2, J2 {ECO:0000313|EMBL:AFP06160.1} OS=Callorhynchus milii (Elephant fish) PE=2 SV=1
TR10439_c0_g1	4718	p3	(TCA)6	1842	1859	cttgggcatcgtttaccacataatgtacacaggaatggaagttctcctgtgtgggatttctgatgtaggaccagagatttcttgttggtatattttttgtggcacagattacatgggaaaggtttctgacctgtatgcttgtacatgtgcattttgaattttaatggtccatagaatactttgttacactggctacacttgaaatgttgccgtggagttgttggacgtttctctccatctcctgtcatgtacatgcaaagaattgtgtttttctgcccctcctccatgccatcatcatcgTCATCATCATCATCATCAgagccgtagatccagctgtcgctgtcctctccctcctctataatctcatctgtgttggttccgttgtccgctgtaccagat…	PREDICTED: zinc finger protein OZF-like isoform X3 [Stegastes partitus]	--	Uncharacterized protein {ECO:0000313|Ensembl:ENSGACP00000006925} (Fragment) OS=Gasterosteus aculeatus (Three-spined stickleback) PE=4 SV=1
TR10709_c2_g2	3264	p3	(CTG)7	1853	1873	tcgatgtaagttggacgattctcctgctgtatttggcacagacgttgtctctggcatacgagtatttggcgtcgctggaggagctcttgttgttgttgactcctcgaatgcaaatatcttttccataagcatggctgcagtgatttctgtgctcccgttagtgttgatacattcccgtattgccctctggataacagctgtagagtaacccatttctagtacgctctgtgctgcatctgtatgaagtagatgctctaagtcatttccacttcctgctactgcacctgtttcagtagtactCTGCTGCTGCTGCTGCTGCTGttgattctgttggttttgttggtactcaatggccatttgcaccaaattgacaaattcttctcctttcttttctctgac…	uncharacterized protein LOC100036859 [Xenopus laevis]	--	LOC100036859 protein {ECO:0000313|EMBL:AAI29546.1} OS=Xenopus laevis (African clawed frog) PE=2 SV=1
TR18079_c0_g1	1942	p3	(TGA)5	1598	1612	aggtcatcatgacagagatgctgaacacaatgatttaaaaagaaaacttgaagagactatcaaagaggaagtcaatgaaaagaaacagaaaatggccgtggaaggacaaacattgggcgagttctttacaactgcagattcttcagattccagttcagacagctccgatgattctgcggctaatgatgatgacaataaaacaaacagagcggaaacaggaagtagcacttctactgtaccggcagcagcaggtgctctccacagtctgattacatcgtatgtgggcagtgaggaaagcagTGATGATGATGATGAtaacaataacaatcaagagaaagatactgagaagaaaacagagacttacaaagaagaatccaaaattgaaaaccaaattcatcc…	PREDICTED: nuclear fragile X mental retardation-interacting protein 1 [Chaetura pelagica]	--	Uncharacterized protein {ECO:0000313|Ensembl:ENSACAP00000006308} OS=Anolis carolinensis (Green anole) PE=4 SV=2
TR18079_c0_g1	1942	p3	(GCA)5	1745	1759	ttccagttcagacagctccgatgattctgcggctaatgatgatgacaataaaacaaacagagcggaaacaggaagtagcacttctactgtaccggcagcagcaggtgctctccacagtctgattacatcgtatgtgggcagtgaggaaagcagtgatgatgatgatgataacaataacaatcaagagaaagatactgagaagaaaacagagacttacaaagaagaatccaaaattgaaaaccaaattcatcctaagagggaacagcacagacggaggaggcaacggcataaaaataagggGCAGCAGCAGCAGCAgggcagcgatcacaataaaagggcatttcctccaaactttgacaagtcccttcttgaaaagttgctggcaaaagatatccgcca…	PREDICTED: nuclear fragile X mental retardation-interacting protein 1 [Chaetura pelagica]	--	Uncharacterized protein {ECO:0000313|Ensembl:ENSACAP00000006308} OS=Anolis carolinensis (Green anole) PE=4 SV=2
TR24447_c0_g1	1423	p3	(ACA)6	1240	1257	atggttaactttgtgaaaagattatcctactgtgtgacagcagagctcatacctctaatggagataccaggagtcaagctgggaagagccagattgatgtatgtagcagggtataagacactaagttctgtgtcgtctgctgatcctgaggaattggtgaaagctgtgcaatacatgcctcgtaaagtggcaaaacagattgtggcatcagccaagttgttacttaatgagaaaacagaagctatgatggaggaggtggaagctcttgtcaccgtgccacaagggatcagagcaggggtcACAACAACAACAACAACAagcatggctgacatggagcctctgacaccttcattctcacaatctcctgtttcaactgaagtgattggtggacagaaaact…	PREDICTED: helicase POLQ-like isoform X2 [Latimeria chalumnae]	--	Uncharacterized protein {ECO:0000313|Ensembl:ENSLACP00000012306} OS=Latimeria chalumnae (West Indian ocean coelacanth) PE=4 SV=1
TR24510_c0_g1	2388	c	(A)10cataatttgctttcaattggattgcaacgcatttccatgcatatgatttgattagtctttctgtgtgtcagtctgtcaaaccgcaaac(A)11	1123	1231	agtctgttgacgtcactgcctgtacgcattgtacgacatgtatggagaacctttgtaaagaatgtttttcgtaccattgtgccatagcagtatgttcatcgcattcttcgccaaaatttgccggaacaatagcctggtgtaaaccatgtgcaagaaagggtgaaagatcttcgccaagaggtttttgcaacgactgtgaagaaaatctctgtgttgtttgttgtgactatcacaaacggcctattgcttccgagacacactgtctccttactctagataagtgtttccggttacaagtatAAAAAAAAAAcataatttgctttcaattggattgcaacgcatttccatgcatatgatttgattagtctttctgtgtgtcagtctgtcaaaccgcaaacA…	PREDICTED: transcription intermediary factor 1-alpha-like, partial [Latimeria chalumnae]	--	--
TR2962_c0_g1	2669	p3	(TGC)6	1777	1794	tgaagcactactttagaaacattaaggaaacagaaactcaaaaagttggacgtatgaaagaaatacttgatcaaatccttccatttaaaacaacaggctgttgtgtccacaggctcagagcaaatgtcgcgtttcaaccgaagaagcagaaaacaaagatggcgaatgcagttaattacatccgggcaacaaatgtttgacagggtgtactcaaacttaagagaaactgttgattaatttgtgatttcgcattttgttgttttttctggagaaaaatttaaacaccttttatggtgaagaTGCTGCTGCTGCTGCTGCtgttgctgctggtggtagattggtgaatttagttttgaactgaaacattaaatgaaccaattaacaaggtaatttgaagaa…	PREDICTED: caspase-2 isoform X2 [Alligator sinensis]	PREDICTED: Esox lucius protein shisa-6 homolog (LOC105023017), transcript variant X6, mRNA	Caspase-2 {ECO:0000313|EMBL:KFQ22133.1} (Fragment) OS=Merops nubicus (Northern carmine bee-eater) PE=4 SV=1
TR27129_c1_g2	1534	p3	(AAC)5	58	72	agatcagaatttaacaaaaacatgcacaataccagctgatgttgcatccatgttggaAACAACAACAACAACaatggcgtcgaacgatgttgaaccaggcacatcaggtggtggggatgaagacaagaagaaaagcagaatggataggctgaagaacctctcacttagaatgaatgaggctcggaagatgaaccatcaggaggttgtggaggaagacagaaggaagaaactgcctgccaactttgaacagaaaagaaaatttgttgagtgggaggaacaggaagagaaaaagagaaaggaagcaatagcaagaggggaggattatgatcgagtaaagttactggagattggtgctgatgatgcagagaaatg	PREDICTED: pre-mRNA-splicing factor syf2-like [Xiphophorus maculatus]	Gallus gallus SYF2 pre-mRNA-splicing factor (SYF2), mRNA	Uncharacterized protein {ECO:0000313|Ensembl:ENSXMAP00000007690} OS=Xiphophorus maculatus (Southern platyfish) PE=4 SV=1
TR28885_c0_g1	1083	p3	(TCA)5	103	117	ttttaatttaatttccaaacttcattatttatttccaacaaatcaagcaatcaacgcattttactattttgtttttgtttcacagcactgtccttatcatcgTCATCATCATCATCAtacatgagatgttttgaaagaataggagtttcttttctctccactttttgcagtttttccttttcatcttcatcttcaaacagtccgaactttttcttctttttctccaccactttctttgttttgcttccaccggtgatatccaaaggtttgtcaaaaccaatcatatgtcggtatatttcctttcccctgaaatcttcagccacaataaagaaagccttgtttctaataagatgtgtggtaaacatccttggagcaaaaggtatttcaacatcctccgct…	PREDICTED: transmembrane protein 70, mitochondrial [Alligator mississippiensis]	--	Oncorhynchus mykiss genomic scaffold, scaffold_246 {ECO:0000313|EMBL:CDQ65671.1} OS=Oncorhynchus mykiss (Rainbow trout) PE=4 SV=1
TR58379_c0_g1	1210	p2	(TA)7	357	370	ctttgtttccacgccagagtttagataccttttaggatagatgaataaacttcccagaattcaaataatataaagtaagataaactgctgaatttctattgatgtgttataattcttgtgtcagtgcaaataccgatacatgccttggccaaaatggacctatctgatatgcatgaaattaattattcttcctccaggatattttcaactgccagaaattaattaagatatatatatcacagtaaaacagtgaaacaatctatcttctttgaagtttttaaaccaatttagggccaatctTATATATATATATAgcatatatagcatttcttaacactatttaaaagcggacattaccaaattttgcagaagttttgagccctttgcctttatgaaata…	#N/A	#N/A	#N/A
TR20201_c0_g3	2883	p3	(CCA)5	22	36	caaccacccacccatgaccacCCACCACCACCACCAcccaccactacagacaatagtgatgggaatcggtccacaaacccaagtcgattaatcggtcttctaagaagaattaatcgccgattaatcatgattaattttaatacatgcaaaagttcaaaatatcaagaatatttaagatctctaatgtaattttgctttattattaaatggtttcacttgacaatcccacatgtcaaaaacatatactgaacaaaagcttagatctttgtcatatcacttgtcagatcacaactgtcataaaacaaaaaagaaatgtcaagcaaaatagtttaactg	PREDICTED: zinc finger BED domain-containing protein 1-like [Oreochromis niloticus]	--	Uncharacterized protein {ECO:0000313|Ensembl:ENSLACP00000006018} (Fragment) OS=Latimeria chalumnae (West Indian ocean coelacanth) PE=4 SV=1
TR498_c0_g1	2090	p3	(TTG)5	762	776	ggtcagcaatgaccctgtcaaaagaataataagaggaaaatagatgtttcaacaatacgtaaatacaaagcagtaaaaataaaatacaaacgcaacagtttaataagaaaagaaacacttgtgataatgggtcatagtttgtgtaatatttggtagggctacaaattgttgttgcaccttttctttcgccgttgctacactgtaatttatatggacgataaatatctaccactttatttataatataattgtgtttgctataaacacattgtgtttaatgcaataaagcaaaaaaatcgaTTGTTGTTGTTGTTGcataactgatcgcttgtttcacgatgattgtcggcaataacttacaggcattaaatcaggcaaggaggctcgtacgcatcctaa…	#N/A	#N/A	#N/A
TR6555_c1_g1	1314	p3	(GTT)5	1234	1248	gtcgtatcttccgtgtcttcatatggatccacgtaattatttctgtctttatctttctccttcactccatccttcttcttgttcttgttcttcttacttttgttcttcttgtctttcttcttcttctttttatctttctttttcttctttttctccttaacaggttccctgtctgttgttgtggtttcttctgttgttgattctgttgttgtgcttgtggtcatggttgttgttgtagtagtagaggtagttgttgttgtaggtgttgttgttgtggttgttgttgtagttggttgaggaGTTGTTGTTGTTGTTtctgtagttggttgaggagttgttgtggttgttgttgtagttggttgaggagttgttgtggttgtt	PREDICTED: GATA zinc finger domain-containing protein 4-like [Larimichthys crocea]	Zebrafish DNA sequence from clone CH211-57L19 in linkage group 13, complete sequence	Uncharacterized protein {ECO:0000313|Ensembl:ENSXETP00000061436} (Fragment) OS=Xenopus tropicalis (Western clawed frog) PE=4 SV=1
TR52428_c0_g1	2170	c	(GAA)7gag(GAA)5	28	66	gacgaggatgacgatgctgatgacgatGAAGAAGAAGAAGAAGAAGAAgagGAAGAAGAAGAAGAAgaggatattgaaatgttgaacctggagggtatgaataatcaaagaatgcatgagcagagaaaagagttcagtaagctcgctgggaagagcgagcttgcacagaggttgttcgatcaaagaatagaagaaacaattacaagcgagctaatcagagattcagagcgttcagaaaggaaaggtacacttctctcagaggttatggagaattcaggtttgaaaagcatcccgatctacaacgaatcattaaaattggcgatggaggagaaatactcgcacatgcagcatgatacgagacctaga	PREDICTED: B-cell lymphoma/leukemia 11A-like isoform X1 [Latimeria chalumnae]	PREDICTED: Poecilia formosa B-cell CLL/lymphoma 11B (zinc finger protein) (bcl11b), mRNA	Uncharacterized protein {ECO:0000313|Ensembl:ENSLACP00000003997} OS=Latimeria chalumnae (West Indian ocean coelacanth) PE=4 SV=1
TR25131_c0_g1	1057	p3	(TTA)15	1	45	TTATTATTATTATTATTATTATTATTATTATTATTATTATTATTAttgatggttagaaaacagattgcagtgacttgcacgactttaaaaacaaaataggattctagtcaagatatagaaacgggtaattttggtgtctaataccgagactctacgttatcacaattgaaatgcttttaaaggtctgttttaaagttgcgtaatattgttttaggtggtatacaatatgaacgtgctgaaaatgcgctgtggtgcacttattttgttaaagtattgacgctgttgtaattgagagagaacactttgaaggcaaattatgtgcaactactttaactttttttgaaa	--	Cyprinus carpio genome assembly common carp genome ,scaffold 000001032	--
TR3845_c1_g1	2306	p3	(ATC)5	2125	2139	gcatttagtttgtgatgctggatcaactttcttcttcactttggattttttacattcctcagctccatcattctgatcatctatcagcggggatgagttactgtgggtcgagctgctgtcagctttgccctcgctgtcaactgcctttcttgcagtctgttttgacctggtttgttttgatctctgcattctgccatttatgcgacatttttgttccaagtgtgaagatgtttcatgtgatgggtattgtggctttataacagaagctgatgttcttctagtagtagtttgatggcttgtATCATCATCATCATCattaccatcatcatcaaattcatcagcatcatcactctttgcctcctcttgactatcttcaacttgtctgttgtctgaaatgtt…	PREDICTED: gastrula zinc finger protein XlCGF26.1-like [Poecilia formosa]	Niveoscincus ocellatus clone B118 microsatellite sequence	Uncharacterized protein {ECO:0000313|Ensembl:ENSPFOP00000030658} OS=Poecilia formosa (Amazon molly) PE=4 SV=1
TR23314_c2_g2	2144	p3	(CAA)5	1872	1886	atcagcttgttccaatttacaacaacgaatttgactgtgccattcgctcagatggctactatgccagtccgtatgattgctcccagtactacatctgcatggctggtatgggctacaggactgactgtcaaccaggacttttgttcaacgatcaaacgctttactgtgatttccaggaccacgtgacctgcagtgctggtggcggcgttccgcctgtcgtgcaaaatccaactcacggtcagcaggcgcttgacacaactacaacacgtacaactcgccctacgacaaccacccacgctcCAACAACAACAACAAaacgtgctccgatccaatctgttagcggaccagtaaatccagcgaattactgtcaaggaaagccagacggtttttacaaggatc…	PREDICTED: acidic mammalian chitinase-like [Larimichthys crocea]	--	Uncharacterized protein {ECO:0000313|Ensembl:ENSPSIP00000014664} OS=Pelodiscus sinensis (Chinese softshell turtle) PE=3 SV=1
TR57331_c1_g1	5746	p3	(GAT)5	1016	1030	gaccacatttccatttcattgcaaaacatgttatatgtaaataatttaactgacttaaagcaacaacaattcaagagtctatttttatattttttgagctggctacattttcctttctttgcttaaacctcttatgtaccaaataatttgaatggctttaagcgatatcaacttaacatttacatggtgaccacatttccatttcattgcaaaacatgttataagtaaataatttaactggctttaagcaacaacaattcaacagtctatctttatgatggtgatgatgatgatggtggaGATGATGATGATGATaatggattttcatggtgaccacatttgctttttctctgcttaaactttttatttgttattaatttgaatggcttctaacaacag…	PREDICTED: LOW QUALITY PROTEIN: selenocysteine insertion sequence-binding protein 2-like [Tinamus guttatus]	Zebrafish DNA sequence from clone ZFOS-433A6 in linkage group 9, complete sequence	SECIS-binding protein 2-like protein {ECO:0000313|EMBL:AFO97580.1} (Fragment) OS=Callorhynchus milii (Elephant fish) PE=2 SV=1
TR35315_c0_g1	6841	p3	(TTG)5	6662	6676	cacaaatgtgtttacagtttcatgactgattacttcatttcatgatttgactagagctttaaaccatttatatgtccaattgaaatatttgatgtttttattatatagaatgtatattattttaacttgtgatgattgtcattttgtaacttgtatcaacacttaaattgtgaattttacgaatgttgaattccattttttttgttttcaatgttttttcttcaacacatgtctacatgttgtcctttttaaatcagtaaacactgttttattatcatctaatatcaatcttatatcaatTTGTTGTTGTTGTTGttctttttttaattatttggtgtttaacatttcaagtgaataatttttcctaaccattatcttgccattttatgattaaagttc…	PREDICTED: E3 ubiquitin-protein ligase TTC3-like [Cynoglossus semilaevis]	--	Uncharacterized protein {ECO:0000313|Ensembl:ENSONIP00000021871} OS=Oreochromis niloticus (Nile tilapia) PE=4 SV=1
TR39520_c0_g1	1387	c	(GTG)5gctggggaggtggtggcggtagttggggtggaggacagagac(GTG)6	1303	1377	gaaacctggcattccaagttacagaagatgaactgaaggatctgtttgaaggctgtgaggcttgcaggataccaccaaatgactacggacagtcaaaaggatttggcttcgtggagttcaagtctgtagaagaggccgaggcagctaagaaagacaaagacggtctggagatccatggccgtgttgtacagctggcgtatgctagcgacaaaccacagggagccagtggaggtagaagttacggcggtggtggtggtggaggctttggcggtcgtggtggtggtcgtttcggtggaggccGTGGTGGTGGTGGTGgctggggaggtggtggcggtagttggggtggaggacagagacGTGGTGGTGGTGGTGGTGgaggctttgg	PREDICTED: nucleolin-like isoform X2 [Latimeria chalumnae]	--	Uncharacterized protein {ECO:0000313|Ensembl:ENSLACP00000010587} OS=Latimeria chalumnae (West Indian ocean coelacanth) PE=4 SV=1
TR6976_c0_g1	1332	p4	(CAAT)5	1	20	CAATCAATCAATCAATCAATccatccatcaatcaattaatcagtcagtcagtcatttactggataatgaacattcaatatcaattgtccaccacatgactgtccacccaaccagcgccaccgcactgcacagtgacacgactcctgttaagcggaacacctcgcagacccaacaaacctcggttatttcacttgcaattctttcaaagattcagtctgatgttgcagaaatctcaaggaagcaggcaagtgactccctaacattgcaaaatcttcaagctgacatacaatgcataaacgtgacattccgaacctttcacg	PREDICTED: pre-mRNA-splicing factor CWC22 homolog [Cariama cristata]	Zebrafish DNA sequence from clone CH73-213I16 in linkage group 17, complete sequence	--
TR29815_c1_g1	1506	c	(TGA)6atacgaggaggagagtgatgaagatgatgac(GAT)10	1426	1504	tgcttctgggagcagtagttcacaagaggttgggtcatcttcggctgaagcaggttcgtcatcgtcagatgtagggtctagtgaatctagggttgaggctggtggctcggggttatccactagttcccctgggtcattggggtccggcgctggaccatcagggtcaggagatggaccatcaggatcaggtgttgaggctgggggatctggcgtgtcagctggaggttctgggttgtctggtgggaagaagaaaacagctgcagttttagacgaagacttcgacagcgaggatgatgatagTGATGATGATGATGATGAatacgaggaggagagtgatgaagatgatgacGATGATGATGATGATGATGATGATGATGATga	protein phosphatase 1G (formerly 2C), magnesium-dependent, gamma isoform [Zonotrichia albicollis]	Danio rerio calsequestrin 2 (casq2), mRNA >gi|49899192|gb|BC075775.1| Danio rerio calsequestrin 2, mRNA (cDNA clone MGC:86817 IMAGE:6901506), complete cds	Protein phosphatase 1G (Formerly 2C), magnesium-dependent, gamma isoform {ECO:0000313|EMBL:ADK55549.1} OS=Zonotrichia albicollis (White-throated sparrow) PE=3 SV=1
TR58331_c0_g1	4576	p2	(AG)20	2265	2304	atcctgttatgtttgctgtgtcgtttttttccttcacttcgagaggcatttggcggggcttattagattgcttgggcaaataacagagtaacttgtatatgtataaaaacagaaaataacagtttaagagacaccttttatattgatattaagaggtgcactcttgtacctagtgcttcaaaagttattgaagtaactagcaccaaagcctagatgaagcggaatactctgcttcggtattgtgtcatttgactgggtatctatgaatatgtatctactttttgatttacagccaatgaaAGAGAGAGAGAGAGAGAGAGAGAGAGAGAGAGAGAGAGAGgagagggaaagagagagcgagcggtgggtggggaaaggattttgcatttctgtgattta…	PREDICTED: fascin-like [Larimichthys crocea]	Cyprinus carpio genome assembly common carp genome ,scaffold LG38	Uncharacterized protein {ECO:0000313|Ensembl:ENSDARP00000094422} OS=Danio rerio (Zebrafish) PE=3 SV=1
TR48089_c0_g1	4573	p3	(GAA)5	1806	1820	gaccacacctccaagtcctctctcaccgactacagctgtagctcggacgctaccatctgtaccttcattttacaaggacactcaggagtcggaggcatctccggagaaggaagaagagagaaccccatctccaacggaggcggagccaggcaacactgaagctgacaacacaactgaggtgaaagcagagccagctgaaatcaatggtgaaagtacaaagacagagaggagtccttcaccttctgactctaactcctcgacgtcggtgaagggtctgctgacaactggtgctaccatggtGAAGAAGAAGAAGAAgtcggtgaactggaaggccgatcacgagctcaaggaaatcttctactttgagatggacgaggaagagagagtgaatgtgaacag…	PREDICTED: serine/threonine-protein phosphatase 1 regulatory subunit 10 isoform X4 [Anolis carolinensis]	--	Uncharacterized protein {ECO:0000313|Ensembl:ENSACAP00000010548} OS=Anolis carolinensis (Green anole) PE=4 SV=2
TR21246_c0_g2	1493	p3	(TTG)5	550	564	acttgaaaacatttatagcatggtgaaatttcatccgctattatatccaatttcagaataatgtagctaaaagttccagatctggagataaaggtcatattaccaaaacagctcactgtttacacatctttattagctacactgaaccataacatgaacaacaataatttcctaccacgcattccgacttgataaaaagcaacctgacatgaaaaacagcaccataaaattggcacatttatcaacttctatcacacttgcttcaatgcattttgcaggtgtgttagaaatgtttctgttTTGTTGTTGTTGTTGttttttcagtaatatcttgcactatgtttttccacatcaaaatatattcaagaatatccacccatgggacatgctgacgtaaca…	PREDICTED: TCF3 fusion partner homolog [Latimeria chalumnae]	--	Uncharacterized protein {ECO:0000313|Ensembl:ENSLACP00000010557} OS=Latimeria chalumnae (West Indian ocean coelacanth) PE=4 SV=1
TR3252_c1_g1	5275	p3	(TCA)5	208	222	ggcacagatggtaacaaactgaatgctgagattctcccacaggtaaacaatgtagatccagatcagatggcacttaagttctacactgtttacccagtgattacagcccaatcccacaaagtaactggttattaaactgcaaatagtcactgattacacatagaaaatgtaaacatgttgtagttctgtccattctaatcatcgtctTCATCATCATCATCAtcgtcttcatcatcactgataacaggtctgggtcggccccgagctggactactgcgctttggagtctgccccttatctgctggtttccctttagatttttctttcacttttgtcttgtccttttctttggtctttgacttggtcgttgatgtggactgggtgtctgtttcatcacca…	PREDICTED: transcription activator BRG1 isoform X2 [Stegastes partitus]	PREDICTED: Esox lucius transcription activator BRG1-like (LOC105012134), mRNA	Uncharacterized protein {ECO:0000313|Ensembl:ENSPFOP00000008144} OS=Poecilia formosa (Amazon molly) PE=4 SV=2
TR9002_c0_g1	12114	p3	(GAT)5	1368	1382	ggggccgctggcgactcccccatgatgcctcccatcccaacttcaataggagggatgccattgaggccagggggagtccagggtcagggtggcccaatgatggggccacccccatatggtatgcctcctggatacaggggacatcctggaatgatgccaccatatatgtaccggggatttccaccatatccaccacctaactttcaaggaatgccgcgacatccttacccatatgatggtcggtttgcccgtcacccaccaccacatatgcagcagcagcgacctagtggagacaaacaaGATGATGATGATGATaagagagaagactataagagacctgctatcatctcagacaaggatctgaaagactttgacgagatattacacctcgattccaat…	PREDICTED: protein PRRC2C [Latimeria chalumnae]	--	Uncharacterized protein {ECO:0000313|Ensembl:ENSLACP00000008949} OS=Latimeria chalumnae (West Indian ocean coelacanth) PE=4 SV=1
TR58971_c0_g1	1575	p3	(ACA)7	556	576	agacaaaatcagaggcatgaactagaacggaagaatgaagaaattgaaaaactaaaacgagaaaatgctgttcttgctgagaaatgtcaaacacttgaggaagtgaacaataaacatattgagaaggagaaaacactgagtaacctgaggaagatggtagatgacttaaagaccagtcacacaaaccttgcagatgaaaatgccaattacaggatcaactatggaacaaacgctctggggagaacaagacggcttgccagaaatgccaacagaagaggctcaacagtggctgagtctactACAACAACAACAACAACAACAgttaaaaagccttctatgaaacctgtcctgactacaacaaacagaagatcaaggaccctcaacagatttcaatgaatt…	#N/A	#N/A	#N/A
TR58971_c0_g1	1575	p3	(ACA)7	1344	1364	agacaaaatcagaggcatgaactagaacggaagaatgaagaaattgaaaaactaaaacgagaaaatgctgttcttgctgagaaatgtcaaacacttgaggaagtgaacaataaacatattgagaaggagaaaacactgagtaacctgaggaagatggtagatgacttaaagaccagtcacacaaaccttgcagatgaaaatgccaattacaggatcaactatggaacaaacgctctggggagaacaagacggcttgccagaaatgccaacagaagaggctcaacagtggctgagtctactACAACAACAACAACAACAACAgttaaaaagccttctatgaaacctgtcctgactacaacaaacagaagatcaaggaccctcaacagatttcaatgaatt…	#N/A	#N/A	#N/A
TR58245_c0_g1	2282	p3	(CAA)6	889	906	cacgaagagaagtcggacaacaaaagtgttagtcgtgaatacagtcgagaagttgacttaccacgagatatcgatgctatggcccttcagtgttccatctccaccgatggggtcctcacagttgaagcaccgatgcccactccacaatacgccgcagtccgtgacggaagtggttcgcgaacgccacctagggaacagattatccaaacaagcacgtcatcttctgtcgctagtacagctcggaacacccctccgccacaagtaccactgcagcagcagcaacaacagagcctacaaaatCAACAACAACAACAACAAaagcattcttcaacgttcacaacatttctttcgggtagcgctggaaaacaacctatgacgtcacatgccatgccaagcccg…	PREDICTED: alpha-crystallin B chain [Melopsittacus undulatus]	--	Alpha-crystallin A chain {ECO:0000313|EMBL:AHH39188.1} OS=Ictalurus punctatus (Channel catfish) PE=2 SV=1
TR55703_c0_g1	1104	p2	(TA)7	968	981	agaacacggtatacatgtgtgggatattgctgctggaaaactgattgtagaagaagcgggagggtatgtctgtgatccgtcaggagagccattggacctgatgaacagaagagtaattgctgcgtgtaacaaagaagttgctggtcaactggccaaaatcacaacaaatatcactctagaaagagactgattactttcttgttgatagttgttacaagaccatttcctccagaatgtctgttacacgttactgatttcaaactaaaatgttttattttttttcgttactccatataaatgTATATATATATATAcacgattttaatagttcttatttggactaacactggttgcttcttggtctgaattaacccttttctccatatatacccggtacgc…	PREDICTED: inositol monophosphatase 1 [Callorhinchus milii]	Xenopus laevis MGC83403 protein, mRNA (cDNA clone MGC:197062 IMAGE:9093717), complete cds	Inositol monophosphatase 1-like protein {ECO:0000313|EMBL:AFP06392.1} OS=Callorhynchus milii (Elephant fish) PE=2 SV=1
TR3832_c0_g1	2948	p2	(AG)8	42	57	gaatgaatctgtaacaaacctgggaaaatagttaaaatagaAGAGAGAGAGAGAGAGtaaaagatggagtattaacatactttcaggaatatgaaaaaggtaaataagtgagttaataagatataatgcttcactgacaactccagaatgtctacaaagcaattggcagagcaaactgcaccaggcggtgataaggacataccaacaaaaaacgtcgaactgccacaatcgtattccggaaaactgattgaattttcaaaagtccaagctattcgacatccggatacaaccttgccacctattttcgacctgggaaatcgggtagcgaggatagtggtcgcacaaatagatgatttt	#N/A	#N/A	#N/A
TR18229_c0_g1	1966	p3	(CAT)5	523	537	gagtaaggggctaactgggatcttgacatggtcagtatcaggtttacatttcatgcctctgcgccctcatctgcttcctgacaatcttctgctggatgatcatagctgtctgctgcagttcctcgtcgggaaatatctccagggcttggagcacacacgcttgtccgtcttcatactgcttgttctgacagtatattcttccagcctctacaagctcattgtaacgtatctgctctgtctccggtaatgattcaaaacctgtttcttcttcactcatttcttcctcattctcatccccagCATCATCATCATCATcagcagcagcagcattgtcatcctcctctgcttcagcatcactgcctccctcatcctcttgctcctcttccacatattcttcat…	PREDICTED: X-linked retinitis pigmentosa GTPase regulator [Nipponia nippon]	PREDICTED: Takifugu rubripes forkhead box protein O1-A-like (LOC101073915), transcript variant X1, mRNA	Retinitis pigmentosa GTPase regulator-like protein {ECO:0000313|EMBL:AAG00554.1} (Fragment) OS=Takifugu rubripes (Japanese pufferfish) PE=4 SV=1
TR26248_c2_g1	2405	c	(T)10aatttttacatggttaactc(T)11	832	872	ttgatggcagtcattatccaggtaggcgcacacccaccgcggttgttcagggccctacgggtttgattccctcggaccaaggaggcagccaaacttcaggttgttggaacagtaattaaaaaatgttctatatttattaattattaattacgcttattattcaaacggtaaatgtgaggtccggaaggatgttcacaacagatcgatatgctttatgatatcagagggcatgcatttttaaaaccagatctacacatcgcaaacttgttcggcgggcccttgaatatacaccttcaacaaTTTTTTTTTTaatttttacatggttaactcTTTTTTTTTTTgcactgcaaattgaaatgaaacaattcctttatttttaccaccaatgttgagaacgtt…	PREDICTED: mucin-2-like, partial [Pundamilia nyererei]	--	Uncharacterized protein {ECO:0000313|Ensembl:ENSDARP00000110773} OS=Danio rerio (Zebrafish) PE=4 SV=1
TR10384_c2_g4	1093	p2	(TA)6	791	802	ttgccctataaagttgtatctgtgcagtaaaggtatactagtaactcctgcagatcaacttggtgaatcttgaactataatacctaaatgaaaaaaaagggctaattaaggcgagtaaaagcactggtgtaagacaaaatagtatatgtggcaaggcattgacagattatagtttccagctgttatttgatcagtcacttgtaaacctgttttgtatatgtactatatttttgtttttcattgtatgaatttaattcatcagaaatatgtgacaaacatagttagaagcttacttatcccTATATATATATAccaggggtgataactgatccgaagttcagcctgcgcattttcccagtcaatttttgtttagaatttttccatataaatactatttat…	#N/A	#N/A	#N/A
TR50008_c0_g4	1980	p3	(AGC)5	1517	1531	ccttcaggaatcagacggtgcttggcacggagggtgtctagccttagcagaacttggtagaagaggactgttgttgccgcagcggctaccagatgttgttcctgtagtgttgaaggccctgtcctatgacgagagaaggggtaatttttcagtaggggcccatgttagggatgctgcctgttatgtatgttgggcatttgcaagggcctatgaaccacaagacatctcgctatatgtgaacagaatcgcaagctcacttgtgatagcatctatatttgatcgtgaggtgaatgtgcgtcgAGCAGCAGCAGCAGCcttccaggaaaatgttggacgtcaggggacatttccacatggcatagatattcttacaacagcagactattatgctgttggttt…	tubulin folding cofactor D [Xenopus (Silurana) tropicalis]	PREDICTED: Nipponia nippon tubulin folding cofactor D (TBCD), mRNA	Tubulin folding cofactor D {ECO:0000313|EMBL:AAI21492.1} OS=Xenopus tropicalis (Western clawed frog) PE=2 SV=1
TR48640_c0_g1	3528	p3	(TGA)7	22	42	ggaagatcatcatgtggagacTGATGATGATGATGATGATGAagatgaagtggtcacagaggatgccggggactctaagaatttgttcactagtgctaaaaatactgtgatgaatattgtaaagaaagtattgaatgtcaactcagagcaggatgctctcatgaaaaatgggacagaggagggcgccactgacactgaggaagctaccctgctgaacgccactaccccggaggataccaccctgccctgtgagcctgatgccaggatccatggcagtggtggagcctccctggaaggtgaaggtcaccacaagactatgaagccacagccgcctcaacctgg	PREDICTED: SUN domain-containing ossification factor-like, partial [Pundamilia nyererei]	--	SUN domain-containing ossification factor {ECO:0000313|EMBL:KFQ84540.1} (Fragment) OS=Phoenicopterus ruber ruber PE=4 SV=1
TR27079_c0_g1	1029	p3	(GAT)5	690	704	catatgaaccattttcatcatcgtatccattattttgagcactgcctggttccccttcaactttctttgcctctagacctaggaaccagatttctggataatccgaaatctctgtctgttcaaatgctgtcagttttcctctgtacaattttagagcctctgcaggggtcattggaagcttgttcccatattggtcccgtttgctcctttctggagtccctatagtcgaataagtattctgacgagattctggctgcttgagggacggtaatgttgactggtcgtcatctttctgtcgccGATGATGATGATGATgttctgactgattcaactgaggtagggttgttgtcggtgccacagctgcaaccagtttcccctctgtattaacaattccatttg…	PREDICTED: dual specificity tyrosine-phosphorylation-regulated kinase 4-like [Lepisosteus oculatus]	PREDICTED: Manacus vitellinus dual-specificity tyrosine-(Y)-phosphorylation regulated kinase 4 (DYRK4), mRNA	Uncharacterized protein {ECO:0000313|Ensembl:ENSLOCP00000020583} (Fragment) OS=Lepisosteus oculatus (Spotted gar) PE=4 SV=1
TR14749_c0_g1	3653	p4	(TTAT)5	3631	3650	ctcaagtggctgtctataacccagttgagtacgttcactgataaccaagcagtcagtgtgactgatgcccagagagcagctatgactgcagagcagctgaaagtgctcggaaaactggagtctgggaatcaggaacagattcaagaagttactattgtcgaccagggtagcagtggtggaactaccaacagaattctaacatgctccatccttgcgattgttttgacagtgttcgttttgtaatacagttaccaaagtcgacatttagactgtttatatctgttatttatttattgttcgTTATTTATTTATTTATTTATtta	PREDICTED: otoancorin [Poecilia reticulata]	Zebrafish DNA sequence from clone DKEY-67N17 in linkage group 16, complete sequence	Uncharacterized protein {ECO:0000313|Ensembl:ENSPFOP00000015828} OS=Poecilia formosa (Amazon molly) PE=4 SV=2
TR5065_c6_g1	1321	p3	(GAT)5	8	22	agaagaaGATGATGATGATGATgaggaagagatggaggaggaggaaacaaaagattccaagaaaggcttctctcctccagcgggaattgtccacgaatcactggtgaaggcaggaaacaagaggaaggcggagaagagtggttcagatgacaaaaagcaagcctcaccatcaaagaagatgaagcctgatgtagacaagaccgatgtgactgaggcgggtgagaaagacccgaaaaccaggccgaggaaagatagactggcaaaggctagcattgagagaactgtgtttgtaggaaacctgtctatcaagttaactaaaaag	novel protein containing RNA recognition motifs. (a.k.a. RRM, RBD, or RNP domain) [Xenopus (Silurana) tropicalis]	--	Novel protein containing RNA recognition motifs. (A.k.a. RRM, RBD, or RNP domain) {ECO:0000313|EMBL:CAJ83915.1} (Fragment) OS=Xenopus tropicalis (Western clawed frog) PE=2 SV=1
TR10551_c0_g1	1243	p3	(TGT)8	1210	1233	tatgatcccagcggcgtatgctattttattttaaataattaaaatgtttcagaccctgtataatcctttttagaatgttttagtgtttgtattatagtgtcatgttgaaatgatgttacagtaatttgaagcataaaaaattaggtaactctgcaaaatgggtctgaaacgaaaaaaaagagaacgaatgatgaaatttaattgtagatacacatttgtcagattttgaatgttttgtttgttaattgcatattacttaatttttcttgcttgtttgcacatcgtaaataatcaccagtgTGTTGTTGTTGTTGTTGTTGTTGTtactgttttg	--	PREDICTED: Poecilia formosa protein phosphatase 2, regulatory subunit B', alpha (ppp2r5a), mRNA	--
TR49229_c0_g1	1336	p2	(TC)7	634	647	tcagcgttgtctgactgcgcatgtgtgaagacgagaatacattcctggataatactactggcacttcataagaacgtaaatcagtgttgtctgataattattgctaaattaacaaagcttggcatcatgtagctttagtagatgatgggaattattctcagacaaacaaaatgcattattgtttccgattcttaaacggtgaatccatcgtgattaaatcattgctacgttcttttatttcttgtttggttttttgattatttttacttagttatattataaaccaattagctcatttttTCTCTCTCTCTCTCtttatctggctgtatattctataaaattcatatgtaactttttgtcaagtgtttttgctaacatgcaaacatgcctgaagaagaa…	#N/A	#N/A	#N/A
TR17463_c0_g2	1087	p3	(CAA)6	614	631	ggtgtccaggttcaaaggtcaaattcctctgcaagttcaaaaagtcaaggtcagagttcaaaagatcagatggcacagttggaggaggaaggcatgttccaacatgatcaaggtaccatgtacgagaacgaaaacatactgcagcagttccagcgacagcaacaggaactagctcagcgaagaatgttggcacacatgcaggagcagcagcagttgcagcaacagcaatttcatcaacagcaacacatgtcaagtcaggaacagctgcaatatcaatatatgttgctaagacaacatatgCAACAACAACAACAACAAcagagacaacagttgtctcccttccaacattcttatcagcagcagcagcaagctgcttaccaacaactactgcagcaacat…	PREDICTED: histone-lysine N-methyltransferase MLL2 isoform X5 [Xenopus (Silurana) tropicalis]	--	Uncharacterized protein {ECO:0000313|Ensembl:ENSPSIP00000000064} OS=Pelodiscus sinensis (Chinese softshell turtle) PE=4 SV=1
TR17463_c0_g2	1087	p3	(ACA)5	1072	1086	agcccagtatgtagtatcccatcctaacattttaatgacacaaggacaggttgtctcaaaacctcagcaaagtcaagcttctgtttcccagcaactgttatactcttctccgatgcaacaacatttggcttcaagccaacagcaacatttactttctcagcagattggtgctcagcaacaaatgcaaggtcaaggacatttgtctcagcttcaaggtcagggtcttttacagggtcaaggtcaacagactacacaaagtcaagttttacagttatcaggtcaaccgttacaactgacaccACAACAACAACAACAg	PREDICTED: histone-lysine N-methyltransferase MLL2 isoform X5 [Xenopus (Silurana) tropicalis]	--	Uncharacterized protein {ECO:0000313|Ensembl:ENSPSIP00000000064} OS=Pelodiscus sinensis (Chinese softshell turtle) PE=4 SV=1
TR40255_c0_g1	3743	p2	(TA)9	3667	3684	tgtgcaaaaaccagtatagactaaaagtggatataatgtgtttctgtgaaaaaaataaagtaaaagaatttgttttaaggtcaaaccgtgcaactccttgacactgacctttgacctctcattgtgataatagacatgctgtttttctgtatatgtgtacaatgcatgtgatttactcaacagggtgaacaaacttcctttattaatagaattaactgaagtgatagttaagcataactagggctggcctcagaaacattcaactgtctcactccgcatggatttacttgaaatgcacctTATATATATATATATATAttgagtacacagtgatgttctgtatttactgggtattattgttacagattttgtctgtt	PREDICTED: autism susceptibility gene 2 protein isoform X4 [Latimeria chalumnae]	Cyprinus carpio genome assembly common carp genome ,scaffold LG10	Uncharacterized protein {ECO:0000313|Ensembl:ENSLACP00000008736} (Fragment) OS=Latimeria chalumnae (West Indian ocean coelacanth) PE=4 SV=1
TR49132_c0_g1	1063	p3	(AAC)6	5	22	caaaAACAACAACAACAACAACacattcgggattggtcgaacattgttatgtgatcagctatgtcagcgctgaggctcctgtttacatcagcctgtaggcagtatacatgtcttactctgaacaagttagcagtcccagttgctgtacagagacaaccttttcattcgtcacaatttgtgaaatcggatgtcagtgacatcatagactctgtagaggacaagcctaaaaccagaagaacagcagaagtaaaacagaaaaagatattcacagatgcaccttatgaagtggattatattcctggtggagagtacataccaacag	PREDICTED: 28S ribosomal protein S11, mitochondrial [Python bivittatus]	--	28S ribosomal protein S11, mitochondrial {ECO:0000313|EMBL:JAA96444.1} OS=Crotalus horridus (Timber rattlesnake) PE=2 SV=1
TR14231_c0_g1	2078	p3	(TAT)5	1775	1789	gaccacaatgcacagaagggaggctactcttgcacactgtcgtaaatcagtatgcgagcgaagtcgatgagcatggatcagatcctgacgagaggttctaaatccatcgatccgagaagagcacaatctacatacattcgcactgcagcaggaatagaaaatgatgctgatggaaccatcccacttgtaccactggctccactcaaagaagtatactcagaaaaattttgatgacagactgggcaactgttagttatattaaagctcaatatctaaatttatgggtgtgacacctgatccTATTATTATTATTATttttaaaagaacaaagctttcttattaatcttcaacctaacacgtttattttttcattgttacttgacaactgtaattttcttg…	PREDICTED: pleckstrin homology domain-containing family D member 1 [Callorhinchus milii]	--	UPF0639 protein {ECO:0000313|EMBL:EOA99253.1} (Fragment) OS=Anas platyrhynchos (Mallard) PE=4 SV=1
TR3312_c3_g1	2792	p3	(AAC)11	2718	2750	actacagaggaaggagctcataatatatcacaatgcctagcctactgtaccaaaggagaattttctccaaatggtctagcgccttgtacaaaatgcagcagcaattcctatcaacccagcacgcgggcatcacaatgtataagatgtaacagtaatcaaatcacaggtgttcttggggctagtttgcagtcacagtgccaagcatacgatgtgcaaataggtcagcacccaacgctactgaaaagctcacgtaacattgatgcaatgactgtgtttatgtggacaaaaattgcaaatacaAACAACAACAACAACAACAACAACAACAACAACgttacccttatcctgcgcaacacagcttcaagtgataaactg	PREDICTED: sushi, von Willebrand factor type A, EGF and pentraxin domain-containing protein 1 isoform X3 [Poecilia reticulata]	Cyprinus carpio genome assembly common carp genome ,scaffold 000002605	Uncharacterized protein {ECO:0000313|Ensembl:ENSACAP00000012927} OS=Anolis carolinensis (Green anole) PE=4 SV=2
TR48776_c0_g1	2053	p2	(TG)6	388	399	tgatatgatggaagtttcagtttgttgaattggttggaagattttgatggggagcacatcaaatgaatctcaatggaagaatgatcggaaattgaaggaaatgtataagatcctaggaatatctttcttcttaattttttttatttaccatgacaaaacctaagaaaactcaacactgtttacctattggcgttttctgggatattgaaaactgctgtgtaccaaaatggaaatcagctcttcttgtggtgaaggcaatccgggaaaagttcttcagtggtcaccgagaagtagaattcaTGTGTGTGTGTGacaccagcaaagagaacaaatatgtcatccaggaactcaaccaagcacaggtgaacattgttcacatagatgctgtcagtaagaatg…	PREDICTED: meiosis arrest female protein 1 homolog [Pseudopodoces humilis]	--	Uncharacterized protein {ECO:0000313|Ensembl:ENSLOCP00000008848} (Fragment) OS=Lepisosteus oculatus (Spotted gar) PE=4 SV=1
TR26855_c2_g2	5599	p3	(TTC)7	4271	4291	ggtggaaggttgagggacatgttcaacttcttcaaagctgtatgggtcaccgtccccaacctgctgaccacgtcggatcacagcattttcatattcttcatcgtcttcttccatgaattcttcctcctcctcttcatcttctatttcctcaatctcttcatcttcttcaatctcttccttaacacctgtagctgtttccattgtccctctctttttctttgcaggggtttccatatcaacatcaaacacctgtccacgctttctacctattggactttcctcttcttcctcttcctctatTTCTTCTTCTTCTTCTTCTTCatcttcaacttcaaacacttcagcttttttacctcttcctctttttggtgtttctttcttagcgggtgttgctgttct…	PREDICTED: zinc finger and BTB domain-containing protein 17-like isoform X2 [Astyanax mexicanus]	PREDICTED: Columba livia cardiomyopathy associated 5 (CMYA5), mRNA	Uncharacterized protein {ECO:0000313|Ensembl:ENSAMXP00000012912} (Fragment) OS=Astyanax mexicanus (Blind cave fish) PE=4 SV=1
TR26855_c2_g2	5599	c	(TCT)5aactcttcttctat(CTC)5	4638	4681	ggtgtttctttcttagcgggtgttgctgttctggtaggttttccacgttttttcggtgtgaattcttcaacttcttcctcttctacatcttcaaactcttcctctatctcctctttcacaactttctttgctcttcctctacctttctttggagacacctcttcttcaacctcctcctctacttcttctatggtttttttacccctgcctcttcctctgccttttggggttggtgtagctttcggttcatctacagacttcctggctcggcctcttcctttcttcactggaatttcttccTCTTCTTCTTCTTCTaactcttcttctatCTCCTCCTCCTCCTCatcaacaacttcttcaacctgcttctttcctccctttcccacctttggggtctct…	PREDICTED: zinc finger and BTB domain-containing protein 17-like isoform X2 [Astyanax mexicanus]	PREDICTED: Columba livia cardiomyopathy associated 5 (CMYA5), mRNA	Uncharacterized protein {ECO:0000313|Ensembl:ENSAMXP00000012912} (Fragment) OS=Astyanax mexicanus (Blind cave fish) PE=4 SV=1
TR9311_c1_g1	2087	p3	(TGA)7	954	974	aatctgatgtttgcgtttctgttgtccagtgatctccttatctttcttcctgtgggactggtatgtctgttcctcagtcaggtgcttcgtgatctctgacgggtctgtgaagtcatcggcgttcacatctatcaggttgatctcttccttgccttgcattttcttcccttgtaaccgtagaaactcttcatcttgctggaagcctcccacatcactgcactctggatattgcatactttcatcatagggcatattataatacatattctgatcagtgtctaaatctgatgcagatattccTGATGATGATGATGATGATGAcactgcattattggataatcgtctttgactggtaacaccacctttgaaagttagtggagcatcttggtctccggtatg…	PREDICTED: proline-rich protein PRCC [Takifugu rubripes]	--	Uncharacterized protein {ECO:0000313|Ensembl:ENSTRUP00000034458} (Fragment) OS=Takifugu rubripes (Japanese pufferfish) PE=4 SV=1
TR10669_c8_g6	1518	p4	(AAAC)5	222	241	tgagttcgatccccagccgaggcgggaaaaaatttctccgtaacaattgaactcggacattgcgtctgagagtcatttgtccctcacctctgattcaagtgaggaagcagtcagtcgcttgcggaggaattggttagtactggttggagacccaggaacaccggttaggtggactgaccgccgggatataacctagctgttgaaaccaggcgttaaacccgAAACAAACAAACAAACAAACaagcatcatgagtgctaagtgtaagctgataagtatcacaagtttactcagtttgtattttatcctgacaaatcagaggcagagacatacgttgtgccccgttgtgcccggtaactgcatgtgcagttaatattcaatgtgtaagtatcgatatttat…	#N/A	#N/A	#N/A
TR50771_c2_g1	7762	p3	(CAA)5	4266	4280	ccgcagaatcagtatccaagcccagccagcactcagggtggtgttgggcagcagaatgtgccctccagtcagtacctaggcccagccagcactcagggtgttggtggtcagtttggaccaggaacttctggttcagctatgacctcaacaacccagccacagtggatgcccacaacatcaaactatggacagccacatcaccaactgccccaacaacaacaacagcaatttcagccacaacaacatcaaatgccgcagactaatcagactcatgctttgcctcaacaacagcagcaacagCAACAACAACAACAAttccctccacagcagcacatgcagcagagtaatcagcagtggtctgggcagcatcagcaacaaccatttgttagccagcctgca…	PREDICTED: tyrosine-protein phosphatase non-receptor type 23 isoform X1 [Danio rerio]	Zebrafish DNA sequence from clone CH211-12B16 in linkage group 16, complete sequence	Protein-tyrosine-phosphatase {ECO:0000256|SAAS:SAAS00140653} OS=Danio rerio (Zebrafish) PE=4 SV=1
TR21382_c0_g1	2591	p3	(TGC)5	2120	2134	tccacatcttgtggcggaaactttggcgcaatattttccaaagactcaaaaatagaatctctttgcgacgccatggtgaaaactctttgattttgaggaagggaagatttggtatgatatacctgctgtggaaactgttgatttaagttctgctgatgctgatgacaaccgttctgttgtaaattaacagtgttgttgttaaattgaaatgttgactggtttacacttgtgaaaactggttgtggttgctgccgaacaagctgatgctgttgagactgcagtggctgctgttgtttttgtTGCTGCTGCTGCTGCtgaccaaaatcaacagtacgctcaagattgatattaaatgtgtctgtaaacccaccagtatttgcaaaagatgagatcactgca…	PREDICTED: thymocyte selection-associated high mobility group box protein TOX-like isoform X2 [Lepisosteus oculatus]	PREDICTED: Danio rerio TOX high mobility group box family member 4 (tox4), mRNA	Uncharacterized protein {ECO:0000313|Ensembl:ENSLOCP00000006228} OS=Lepisosteus oculatus (Spotted gar) PE=4 SV=1
TR1037_c0_g1	1495	p5	(AATAT)17	1408	1492	atatcataacaggaatggtcacatccgaatgacacggcagctacactgcctaaggagctgagggaaaatagcggaagatatataaaacggtcagtttcatataagacaccagaaacaattaaagaaaatgagaacaagagcgtttttgatactgggcatcatttatgcatacctgactcttgcccctacaggtcctccattgtataaacaagcacaaaatgtctcggtcaactaacaccaaccgacctaccaactgacaatgttacatgcaaaagtacataaacataaaataatataataAATATAATATAATATAATATAATATAATATAATATAATATAATATAATATAATATAATATAATATAATATAATATAATATAATATaat	PREDICTED: cornifelin homolog A-like [Latimeria chalumnae]	Cyprinus carpio genome assembly common carp genome ,scaffold LG41	Uncharacterized protein {ECO:0000313|Ensembl:ENSLACP00000000840} (Fragment) OS=Latimeria chalumnae (West Indian ocean coelacanth) PE=4 SV=1
TR27127_c0_g3	1199	p3	(AAC)5	687	701	aaatatatacgtgaattagaacaatcaaatgacgacttagaaagagccaaaagagctactgtagtatctttagaagactttgaaggcagactcaatcaggcaatagaaaggaatgcatttttagaaagtgaactagacgaaaaggaaacattaactgaaactatacaaagactcaaagatgaagctagagatttacgacaagagattgatgtacggcaaaaaccttcatcactgccaaattcaggggcgacaactcccacaaatcctcagtcagtggagtgtcgtctccaaggcagcctaAACAACAACAACAACaccaaactgccaggcggggttgcgaaggtcgaagctaatggtacagtgaaccatgttgaccaggggggcaatactactccaaat…	Unknown (protein for MGC:145005) [Xenopus (Silurana) tropicalis]	PREDICTED: Lepisosteus oculatus nuclear distribution protein nudE-like 1-B-like (LOC102695668), mRNA	Uncharacterized protein {ECO:0000313|EMBL:AAI18698.1} OS=Xenopus tropicalis (Western clawed frog) PE=2 SV=1
TR55349_c0_g1	2730	p4	(TACA)5	947	966	agatgttgtacataacgtgtagatggtatccctgcggatgttaatgcagtattcacgctatcctgagattcaaacctttccccatccaagctcagcacacttcaacaataatacgccaataaaatctcccactttccaagcataaaaagccaaaacgtttcctgaggctacttagtccagacgagcattacgtgacctaacggccagtctagtcgaacaacttgcgtatccttgtgttaggagacaggtaacaaagtaacccagtaaagactttggctgaacgctgtcaatctatttaatTACATACATACATACATACAaagactttaaattggataaggcaggagacttttctgctgacaaaagtattttgcaaagaatatgtctgttaatacattg…	PREDICTED: tropomyosin alpha-1 chain isoform X8 [Poecilia formosa]	Xenopus tropicalis cDNA clone IMAGE:7690640	Uncharacterized protein {ECO:0000313|Ensembl:ENSGACP00000021650} OS=Gasterosteus aculeatus (Three-spined stickleback) PE=3 SV=1
TR23616_c2_g2	1470	p4	(TTGT)5	1408	1427	ctccaatctcaagcatctgattggctgaaatgcatgaatcattttgtgaaaagtctcaaaaatgtgagatgtagttatttaagaaagcccattcagcacattatgtcactgtgtgctaactttcaaggatgtactgatgaaccaacaacttctgttgatacaccggcaaaatccctgcgagacaatatcctctcctgaactttgcatgtatcatcacgccagtgccagacagtacatctccttcttattttcatggtaataataggactgttttgcactaagttgacagtatacaaacaaTTGTTTGTTTGTTTGTTTGTttcgggtttaacgcctggtttcaacagctaggttatatcccgg	#N/A	#N/A	#N/A
TR10318_c0_g1	1806	p2	(TG)10	40	59	tagacaactgccatacattataattcggataacgcacgtTGTGTGTGTGTGTGTGTGTGttttgctttgagcatggatgagttcgagaagctgttaagcgatattgagaaagaaattattcggggagagagtaacgaaggggctgttgctcaaaatgttcccaagaagaaacatttcgagattatctttagtacttcttcaacggaaggtctagaatcattccattcttcttgtgatggtaaaggtgctactctaacacttttacgtggcaaatacaacgtttggtttggaggttacacctgcgagagctggtataaaggaaagaaacatcgaaaagaggatagtaaagctttcttgtt	PREDICTED: LOW QUALITY PROTEIN: interferon-induced protein 44-like [Pelodiscus sinensis]	--	Interferon-induced protein 44-like protein {ECO:0000313|EMBL:EMP30295.1} OS=Chelonia mydas (Green sea-turtle) PE=4 SV=1
TR12870_c0_g1	3508	p3	(CTT)6	671	688	ttcatacggcggagcagtgttgttctcctccttgaagtaataatccatacagtacaaccccaccagatccttctcatcctcaatctgagctatcctctggtcaaagttcttcagtttctcgatgtctctgctcacttctaatgtgtattgcttgactgctggatccttcttgacctttttcagcattttatcatccatgcgactaactatgacctcatcagtgatatccgaggctttctggggccggaaatttttgggtacactcatggcccccatggaatcataatcaggctcctccgaCTTCTTCTTCTTCTTCTTtttctttttcttcttgcctttcttggtcttgtagtccactctgacaatatcccggtccagttctctagccatctgggccat…	PREDICTED: neurofilament heavy polypeptide [Callorhinchus milii]	PREDICTED: Stegastes partitus interactor of little elongator complex ELL subunit 1 (ice1), mRNA	Uncharacterized protein {ECO:0000313|Ensembl:ENSAMXP00000021494} (Fragment) OS=Astyanax mexicanus (Blind cave fish) PE=4 SV=1
TR30205_c0_g2	1980	p2	(TG)7	1613	1626	tgaaagcaagagactacgaggccggactgaggatgaaagatctgtttaaaccttgacaaatatagtgttgttacttgtacgtttgaattgcatatacgtgacaaataaatgtcacatttccaggagcttgatttctccacatatctaaaaaaaacataggaagaatggaaaaaaagtcttgtttttcagtgccaagactcaaaagtttctgattttaatattggcgaaattttatgtgcgcattgttgttattcaataaattattatgtgtgatgaaaagagtcgtacatgtaattatgtTGTGTGTGTGTGTGttttaactatgttgacattaatgcaacacatttgctttgacgtcacaatttaattgttcatacaaacccccaacaacatatacga…	PREDICTED: intestine-specific homeobox [Corvus cornix cornix]	PREDICTED: Corvus cornix cornix intestine-specific homeobox (ISX), mRNA	Uncharacterized protein {ECO:0000313|Ensembl:ENSAPLP00000008469} (Fragment) OS=Anas platyrhynchos (Mallard) PE=4 SV=1
TR23742_c0_g1	1988	p4	(TCTT)8	1	32	TCTTTCTTTCTTTCTTTCTTTCTTTCTTTCTTtctccaaacatttatttttttgttttcaacaaaaactgcatacaaatcaacatgcaaaaactttacaatctgttggccctaaacattatatacaattttttctcttctgattataatactctcgaacataaaatacattttcacttactttctcatcttttcctcactaacacaatcaaagggaggttatttcctcacaaacacaatcaaagggaggtaacctcctcactacctcttctatctcacatttaaagggaggttattaggaatatttactgatttatgggaacaattagtatt	--	Zebrafish DNA sequence from clone CH211-231B2 in linkage group 1, complete sequence	--
TR7639_c2_g1	2498	c	(TTG)6gacgtacagttgttgttgttattt(TTG)5gacgtacagttgttgttgttattt(TTG)5	2395	2490	atttattaatcctaataatgtagtatgagaagcactaggaggtgacactggactagactgctgaggaggcgggggttggggcggagctggggtcagtgttgggggtggagcctgctggttctgtacacctttcaacagttcttcaataatattcacagcatttcctgagtttaaaatcaagttctttaactgtgagttttgcagcaactgatttaacagctcttgctgactcttttgaagacgctcttgttcaagttgttgctgaagccgcttctgttcttgaatttgttgttgttgtttTTGTTGTTGTTGTTGTTGgacgtacagttgttgttgttatttTTGTTGTTGTTGTTGgacgtacagttgttgttgttatttTTGTTGTTGTTGTTGgac…	MLX-interacting protein, partial [Struthio camelus australis]	Hucho taimen clone ZA-27 microsatellite sequence	Uncharacterized protein {ECO:0000313|Ensembl:ENSLACP00000021439} (Fragment) OS=Latimeria chalumnae (West Indian ocean coelacanth) PE=4 SV=1
TR9564_c1_g1	1369	p2	(TG)6	870	881	gtgcttagtttttgtgtttgatatgacaatgcaatgacaaaagtagcaagcccttaaagttataaacaataactacagtaatatcacagatgtaatgttaatttgaagctctcttcagatctagcagcaccaaaagacattattactttcaaataagtatttgatagccattcactctgtagttatggcttttattgcatgggaaaacagtgtatatccagatcagttgacacacctgtaaagattcaattggttatttctgaccaagaagcaaagtgtagatgcatatctgacagcacaTGTGTGTGTGTGctgatctggatccacactgttaacccacaagataaatgtataatattacacatatgtatataaatatacagtatatatacagtaaag…	#N/A	#N/A	#N/A
TR9406_c3_g3	1816	p3	(TGT)6	1757	1774	agataacggagtttctgtagaggtagaaggtggatatggtgtggtaagtgtggaagatgttactgattctgaggtagcttgtgacgacactgggaacattgttgttgatgttgaagacgatgatgtcaccggaattattgatattgtttccaaatttgatttagttgataatgttgttgctgaagttgatgttgttgttgttgatgatgatgttggtgtacttgttgtagaattatttgttattggtggtggtgttgtttgtgatgttgctgctgttgatgttgttgttgctgctgctgcTGTTGTTGTTGTTGTTGTtatatttgttgttaacgatgataatgatagtaccgtactttg	PREDICTED: mucin-2-like, partial [Pundamilia nyererei]	PREDICTED: Callorhinchus milii forkhead box P2 (foxp2), transcript variant X6, mRNA	Uncharacterized protein {ECO:0000313|Ensembl:ENSDARP00000110773} OS=Danio rerio (Zebrafish) PE=4 SV=1
TR39814_c0_g1	1071	p3	(AAT)7	965	985	atgtgtatagttatataattgttatctttaaattgtttatttttacagagttttaaagagtttttgtcatattatttgaacaattatttgcataaatctatcactgtttaatatttctcataaccaccatataaacatccacaacaatacacatatgtgggcataagtgccctatttttattttctaacctgtttacatactgccctatttgcatcgtggtcagtgagtaattgtcagaacaaaatgaataacaagcatagaaattaaaattagcactctaaatgatacagatttttataAATAATAATAATAATAATAATaaatattataattatataatggtagaaattgtgctaatatatatgccccacttttaattgtgtaattttttttatttg…	--	Zebrafish DNA sequence from clone DKEYP-111B3 in linkage group 21, complete sequence	--
TR55434_c0_g1	3452	p3	(ATG)5	272	286	caaaacacgccgaaaagaaagaagattgatatcgttattctttgataattctaaccattgtcctagaatatgccggggactgccaggcgaggaagacgagtgggacagaagaaacttttcaaaagcagcaagaccacagatccagagttatcagagcatggtatcacagaaaccactgatgctgacaaagttgaagatgtggataccattgaaattgaagatgaaaatggtgaagatgacaagacagaaaccattgacatagatgatgaaaATGATGATGATGATGaaacaaaaaaagaaaacattaaaaagcaagatgaagtcatggctagtgaagacacagaggcagtggatgaactaaaagaggaaagtgaagagcagcaggaagatataggggct…	PREDICTED: glutamic acid-rich protein-like, partial [Cuculus canorus]	--	Uncharacterized protein {ECO:0000313|Ensembl:ENSTGUP00000017547} (Fragment) OS=Taeniopygia guttata (Zebra finch) PE=4 SV=1
TR38490_c0_g1	5365	p3	(AGA)6	3754	3771	gtcaaaccgtgagcgtcacttgatacgtaaacatggcgtcaacatgttggacccaatgtctcgtcagactatggatcgaccattcaaatgcccactgtgtgttttcagctctttctcaactcagagcaacttgttaaagcactacagagatcgccacaacggtgcaaacttgccagaaaacattgccgatatcgagagaatgtcaccaacagctatcaaagccgccactctggagatggagatcagagctcgcgaaaatccaccaaaagctgacgacagttcaagtctcaatatgactacAGAAGAAGAAGAAGAAGAtttagataattctattgactcatcagagaaaatggaagatgattacgcagagatggaaatggctgatgacaaaacagataa…	PREDICTED: ras-responsive element-binding protein 1 isoform X3 [Ficedula albicollis]	--	Ras-responsive element-binding protein 1 {ECO:0000313|EMBL:KFV44694.1} (Fragment) OS=Tyto alba (Barn owl) PE=4 SV=1
TR7152_c0_g2	1956	p3	(AAC)5	1478	1492	aagcccggtcatccgacctacacccctgactggaggcaccttcacaggacagctcataccctaccagaccggcagcggtttctatggttcctcaaatgcatgtgtgtacaaaggtgtcgtctataaacaaagcgagacatggaaagatggctgtaactataactgtgaatgtctggatgcttcccggggacaatacaggtgtacagacaggtgtcctcgatatcctttcctgccaccaacatgtcacactgtgccttctaggactgacgtctgctgcagtgaggttgaatgtctgctacaAACAACAACAACAACagcacagagtgtgactcctacagtaaaacaaccagtttcagtctctccatctttaccacctgttccaaaggagtgtgtactata…	PREDICTED: kielin/chordin-like protein [Chrysemys picta bellii]	--	Uncharacterized protein {ECO:0000313|Ensembl:ENSLOCP00000019168} OS=Lepisosteus oculatus (Spotted gar) PE=4 SV=1
TR14783_c0_g3	2198	p3	(CAA)6	1229	1246	cggtgatggtgtttttggtaaagaactagagtcactgttgaaagacaaaaaagaaaagaggaaacaagttgaggatttgattcctgatctgaaaaagaaacgaaaattttctggtcaatcctcggagcgagattatcctgctaaaagacaggctggagagaaatcttcggaaaaacctagtacatcttccggttggaacaattttcgtatccccaagttgtccaggtcagatccaaaaggaaaatctcggggcagaggcagctatggttctgggggttatggagcccgtcggacctactcCAACAACAACAACAACAAaacaaagccagtggcaaaaacagatgaaaaatgacttgattttgaagaagtctccatttgaaccgctgaagtgtgccagtt…	PREDICTED: uncharacterized protein LOC103279601 [Anolis carolinensis]	--	Uncharacterized protein {ECO:0000313|Ensembl:ENSACAP00000023280} OS=Anolis carolinensis (Green anole) PE=4 SV=1
TR25507_c50_g9	1521	p3	(TGA)5	629	643	tgcaatggattaaatcagtattatatagcaaatttacatcaacaatttacgacagactaaatagaaattccaataaactccaaaattgtacaactgacatcatacagatttacagtagattgtacaaatacacatcactactctgtaacacccagatttgttacctctttaatcaatcatcaagtttataattgttagtgttttgtaatttttgttcaatttttaagaaattgcttttgttaccatggttacccattctccagaactcttcaaaaagtttctgtcagtataatgattgatTGATGATGATGATGAcgatgatgcaataatcaaagtaacaaatatcactcaatacactgacaaaaactttgtgaacacagcatgcctttttacacacct…	PREDICTED: ADP-ribosylation factor 1-like [Cynoglossus semilaevis]	PREDICTED: Poecilia reticulata ADP-ribosylation factor 1-like (LOC103468656), mRNA	Uncharacterized protein {ECO:0000313|Ensembl:ENSXMAP00000009214} OS=Xiphophorus maculatus (Southern platyfish) PE=3 SV=1
TR57492_c0_g1	7840	p3	(GAT)6	4377	4394	tcctttaaggtggccaactatgctgttaaagagggatcttccgatgaggatgagccggagacggaggtgttgaagcaagaggcggagcatgctgaccctgcctactgggagaaattgttaagacatcactatgaacagcagcaagaagacatggctcgcacattaggcaaaggaaaacgtgtccgcaaacaggttaattacaacgatgcagcaatgggtgggtctaccgctgatgatgctgcatggaaggagtcgctatcggactatgactctgatttcagtcataatggagagaatgagGATGATGATGATGATGATttcaacgaacagaaggagggcttgtcttctcgaaacaagaggaatgagagaagagaaagagaccgaccattacccccactg…	PREDICTED: chromodomain-helicase-DNA-binding protein 4-like isoform X2 [Cynoglossus semilaevis]	PREDICTED: Melopsittacus undulatus chromodomain helicase DNA binding protein 4 (CHD4), mRNA	Chromodomain-helicase-DNA-binding protein 4 {ECO:0000313|EMBL:AHH39755.1} OS=Ictalurus punctatus (Channel catfish) PE=2 SV=1
TR57492_c0_g1	7840	p3	(ACA)5	6807	6821	cgtggtgccagcaagaaagcagcgatctgtatagagtaacgtcacgctggcgggagatgtggttaaacaagactacaagaattgttcatgtcacttgtaacagtttcaatcaaacaacaaggcgtaaaggctgtcttcatgattgatggcaactaagctccaagtcacatgaccagctgtctataaatagtatttttaagacgtaaattgtacctttgaaggtttcagcagtgagacaagtggcaaatgaaaagcagaatattggctacatttgcctctgcacctaaataatcgctcaagACAACAACAACAACAgagtttctctaatgctgctaaattaatgttgttgaattttggttattccattaaattaattaaacttgaggtatgtgtctacac…	PREDICTED: chromodomain-helicase-DNA-binding protein 4-like isoform X2 [Cynoglossus semilaevis]	PREDICTED: Melopsittacus undulatus chromodomain helicase DNA binding protein 4 (CHD4), mRNA	Chromodomain-helicase-DNA-binding protein 4 {ECO:0000313|EMBL:AHH39755.1} OS=Ictalurus punctatus (Channel catfish) PE=2 SV=1
TR23265_c0_g1	2331	p3	(TGT)5	1032	1046	tgtaggtatgtaggtttgtgtggcaagtgaagaatttcctgggtcgatggtaggaagaaactttgttgactgatcaagtgcagtagctgcggccaccaactctgtgtagtccaaatgggtgctacaagaaccacttcggccttgtcttggagaattttctgaagaaccctcgggatgatgctgagctagtttctggcgccagattggaagttccggtttttgggtttctgttgatggtgcgattttttgttgtttgaagatttgtaggtttggtgtggttcttttctttggtttgagctgTGTTGTTGTTGTTGTccatgtctgtgttgttgatggtgggtgggagtgtagtttcctccccacttccgtttttctaaaaaatctttcttctgggtggtc…	PREDICTED: uncharacterized protein LOC103911649 [Danio rerio]	--	Uncharacterized protein {ECO:0000313|Ensembl:ENSXETP00000063618} (Fragment) OS=Xenopus tropicalis (Western clawed frog) PE=4 SV=1
TR6630_c0_g1	3834	p2	(CA)9	402	419	tacatactgactttcagacagtaattgataccagacggatttcaagtgaatgagacaatggtaccccaaatattgactgatttactttactaaaaaactttcaggatcaaaatagaaacaattcttcagacacaacaagttacaccaactgaagctgttagttcagtttcctatgatacttaagctgttttacagcttcataacataaacagcacattttatcttgttttgctcagcaaaacattaaataacattgcattcttcattaaaatttgtctgacatggtttgttttttcacacCACACACACACACACACAatacacacagaatatatgtaattcagcattaaaattatataagctgtgatgtagaattatatgtagcaaaaccatgagtag…	PREDICTED: membrane-bound transcription factor site-1 protease [Caprimulgus carolinensis]	PREDICTED: Cynoglossus semilaevis membrane-bound transcription factor peptidase, site 1 (mbtps1), mRNA	Membrane-bound transcription factor site-1 protease {ECO:0000313|EMBL:KFP71799.1} OS=Acanthisitta chloris (rifleman) PE=4 SV=1
TR19150_c0_g1	2034	p3	(AAC)5	1586	1600	agccaaagagactacaactccatgtatggtcgccagtatgacaacatgccacgtatgcatgatggtgatagcacggcagggcatgatgatgtttttatgtatgaacctaaaaattagtcccagaatgtcttgtatgcagttaccagtttagggtgcctggatgattctagagattatatcccatgtattgtgttgccatgacaacaagagatcagtacctgaaataatcctcagatggacggttgccatgacaacatgtccttgtgttgaatgttgctgatttgcatggtgctatgtgaaAACAACAACAACAACataaaatactatgcagaattagttagaatgtctgttaatgattgaatgaaagcgaagaaattgttgttattttaacttgtttgt…	PREDICTED: metabotropic glutamate receptor 3, partial [Caprimulgus carolinensis]	--	Metabotropic glutamate receptor 3 {ECO:0000313|EMBL:KFZ55765.1} (Fragment) OS=Antrostomus carolinensis (Chuck-will's-widow) PE=4 SV=1
TR7989_c1_g1	1802	p2	(AT)8	672	687	gatatatatattttccgaaaacggcagaaaattgttttaaatgtgattatttaattaagttttatttaattaagttttataatctctgtaatttaatttatcgtatcaacatagcttgattctcattcttaaaatcccctctgatagagacagtgtcaaacatatttctctgaaaactataatttgcgttgtttacttttctttactaagttatcttgctgaattttctaaatcaggattcatgtggaagtttatttcattcattaatttgtgttttactttgtttacttttgcacgaggATATATATATATATATgcatgcatgtacaatgtaaaagtggagtccatcaattatatcaaaaaattaacatgaagactaaatttaaaaaaactgcactt…	#N/A	#N/A	#N/A
TR50780_c0_g1	2595	p3	(TGT)5	1041	1055	ttgatgggagataaggacatcatcgaaggatttgaggcaatgacagcttgtgtgtttgtctctattgcaacactgttgccaggcatctggatcctattttgttgatcgggcattgctgacgtggagggtctaggtaatatcctcatgtgttggcttgtctctgacttcacatgtgactgctgcctaccatacaacacgtgttgcaggggcagggacgtaaatcccgacgttgacgttgtggtgtgtgatgccaccgactgaaagttccgtaccatgccagactgagactgctgctgtagcTGTTGTTGTTGTTGTtgctgctgctgcaggtgtcggtgtaagaactgctgaagttgttgtgatactgtccgagagtggacttgtgacgtggaagtcggc…	unnamed protein product [Oncorhynchus mykiss]	PREDICTED: Tinamus guttatus PAS domain containing 1 (PASD1), mRNA	Oncorhynchus mykiss genomic scaffold, scaffold_669 {ECO:0000313|EMBL:CDQ73968.1} OS=Oncorhynchus mykiss (Rainbow trout) PE=4 SV=1
TR39491_c0_g1	1146	p3	(TGT)5	548	562	aagtacaatgaacaagatgatcttggtagggttgtttgttacggtggcatgtgtgttagtagagagtacccaaaggccgccaggaccatgtgatggcaaagaacgcggggatgaatgtagcatcggcgcagatgttgaagggacatgtgtagaatggaatatttgtgagggtgagcccggatgtggtctgatctgcaaagtgagagcaaacagtcgatctaagcgagcatgctgttttacgtgccggtggtattgcagttgctgctacgcctaaaccccataaacaggataaacctataaTGTTGTTGTTGTTGTtttaaatcacaaaagacttgggccagtatctcacaaaatcagcctaaggccacattaaaatgaattgttttacatcacctttaa…	#N/A	#N/A	#N/A
TR50779_c0_g1	2098	p3	(AAC)5	90	104	tatcatttttgaaacttttgattctagtggttgaaattggcggtgattattgcacaattttagtgtcaacttattttttaaacaaataaAACAACAACAACAACacgtgccttgaatataaatgaacatactgttcaacacttattatcgaggttggtaatgatatattttacgtttatgattctaatcacaataagtcttgcgactctagtgggtccgaataacacaactttagatgttgattacttttagacagtgtaggtgaatttactacgtttgttttatatcacgaatgtcatgttttgttgtagtatttctgccctttattttacgccgcaaagtcacactaaacttttatggcgttcacactgcaataatttacatattaaaggtacgagc…	PREDICTED: GTP-binding protein REM 1 [Geospiza fortis]	--	GTP-binding protein REM 1 {ECO:0000313|EMBL:EMP33250.1} OS=Chelonia mydas (Green sea-turtle) PE=4 SV=1
TR22311_c0_g1	1166	p4	(GACA)6	1	24	GACAGACAGACAGACAGACAGACAaaatattgtatatagggtaattggtaaaaatatgctaacgaaaaaatcagttttatcaatctccaactgtaagctttcgataaaagatcctttagatttcatgttttggggtagtcaatattgcagttgtattcgtttagtatatggtttcggccagttgttcaaaaacaataaggtttcaaacttttttatcaaggacgtcaatgtcacaccgatctttaactttggtaatttgaattgtattacaaaacgttttgatatacgatccaagagctatgccgttttcggtagtttatataa	PREDICTED: protein PROCA1 [Oryzias latipes]	--	Uncharacterized protein {ECO:0000313|Ensembl:ENSORLP00000005477} (Fragment) OS=Oryzias latipes (Medaka fish) PE=3 SV=1
TR55493_c0_g1	2769	p3	(AAC)5	10	24	ctttgatctAACAACAACAACAACaaaagattgtttattatcagttttatccgacgcatttgctgttattaacatttagaagctgatgaatgttgaaaattttcagaattagttatttgtaatcatgataaaagatgtcatcattggaactgtctgatgaaaacttgagcagtgaagatgaagatgttatcattgcgaccatggagagcacgtcaggacttcctgataagaagcttgtttctaagaaacctggtggaaacggcaaggatgtgaaagtgatacattctgagacagctgtggccacggtgaagatgtcaggcacaa	PREDICTED: differentially expressed in FDCP 8-like [Poecilia formosa]	--	Uncharacterized protein {ECO:0000313|Ensembl:ENSTNIP00000012153} OS=Tetraodon nigroviridis (Spotted green pufferfish) PE=4 SV=1
TR3052_c0_g1	1736	p3	(ATA)5	622	636	gtaaaattcagtttgaagaccatattcagaatgctagttctatgtgtttcatcatgttgcaaagtccccaagtgggtggtttattgctgttaaggaaataagtttctatcagtcagttgaactttggtgtttggttacatttattggaaggctgagtatttggaaatgctgtcaaacctggctgtgtggtcataggtcaggtctaagtttgtttgtttttgactttcccatcgtctatgtttacaggaattttaagtttgaaaacagtagttactgttactgttttaacacagtaaatatATAATAATAATAATAgtatgagaggcaaaatggtactgtactcatttggtatctcacctgtcttgcttgtaaccaaagtactacaaaaatccactgact…	#N/A	#N/A	#N/A
TR41519_c0_g1	1908	p2	(TA)6	1766	1777	acatcttgtttattacaacctgtttctttccaatattttattcttgttaatgaatactatgtcattctgatatgatcaaagtatcattatggacctatgagaacagactggatgtaactttacttgatcttgaattaaacattcgtgaacattttataaataataatcacaagtttgttaatggttgcttaagatgcaaaaatcttgttaaatatgtaaagaaaattagctttttgtaaaaaaaactacagtttgacaggtaagaaatccaaataaatttcatctcatatttaaggtaatTATATATATATAaacccagtattttatagattattttgtgtttctaatcttaacaaataaacaagtctttgtgcatgtaatactgtttcagtgatcata…	#N/A	#N/A	#N/A
TR25524_c0_g1	1656	c	(TC)6tg(TC)8tg(TC)8tg(TC)8	1580	1645	acgtgctcacaatcatgtggaataactacaaagatagaatgaaacaagagggaaaccactacaagaagggcgaggaaacctatgatgcataattcccagatgttaagaatggaactactggtcaaattagatatttgactgacttattcatttcattttggagtgtttgattcagaaaggcagctgataatattatgttttcttttcgtgggttgtgtgtgatatcttaatactgatgttagtctttagccccatgtctgtcttttcatccgtccgtcagtatgtctgtcagtctctctgTCTCTCTCTCTCtgTCTCTCTCTCTCTCTCtgTCTCTCTCTCTCTCTCtgTCTCTCTCTCTCTCTCtgtctctctct	PREDICTED: luc7-like protein 3-like isoform X1 [Pundamilia nyererei]	Zebrafish DNA sequence from clone CH1073-236F2 in linkage group 14, complete sequence	Uncharacterized protein {ECO:0000313|Ensembl:ENSAPLP00000000341} (Fragment) OS=Anas platyrhynchos (Mallard) PE=4 SV=1
TR25148_c1_g2	2088	p2	(CA)11	2066	2087	aatttaaaaacttttatctcttgaaatttatagcaatatttttgtattatggtttactattaattaatttgactgtaattctgttaatttcgaattcctgattgtaaaagcaactaaatggaaaaagtttaaaatcatgtattcctaaacttaagggtaaaatggcgtaaaattttgtacgatgcaccgcctacaggtcttcaatagagtttatcgaaattaaggcgtttgggtcacttttggcttcgaccttttggacattgatcactatggttttccacacacacacgcacacgcacgCACACACACACACACACACACAc	--	Cyprinus carpio genome assembly common carp genome ,scaffold LG26	--
TR1595_c0_g1	3039	p3	(GTT)6	2707	2724	tcttcactgtatgatctctgtgctatgtcttgtcacacaggaattctgggaggtgggcattatgtagcgtttgccaaaaatccgaactccaagtggtactgctacaatgacagcagctgtaaggaagtgcaggagagtcagctagacacaaacgcagcatatattttattctaccaaagaagggatatagatgtggcatcattcatgccagaaattgccaacaaaactcctgacacgcaagaaatagacgatgaatttgaatcagactttaagcgactctgtgttattcagtagcaattaGTTGTTGTTGTTGTTGTTaattttagaatatttattgagttaaaagcaattaggtaatgtactaaggtaaaatgttcaggaagttgatgtttcttggtc…	PREDICTED: ubiquitin carboxyl-terminal hydrolase 32 [Geospiza fortis]	PREDICTED: Melopsittacus undulatus ubiquitin specific peptidase 32 (USP32), mRNA	Ubiquitin carboxyl-terminal hydrolase {ECO:0000256|RuleBase:RU004435} OS=Taeniopygia guttata (Zebra finch) PE=3 SV=1
TR57444_c0_g1	4219	p3	(CAA)10	1	30	CAACAACAACAACAACAACAACAACAACAAcaccgccaccaccaccaacaacaacaacactaacaacagccaatacctccacggcaacgatcattgacagcacaaccattaacctatcctcatcccttccgtccacaaacagtaatgctactgcacaagttaccgacacaactgctaccgataacgtaaccactgcttcgacactcgtttctacaagtaatatatctacggaaacaacagctccttcatcaacctcacctaatacaacagcaacccctacaaccgttgtaataacctcctctttgaaccagtcagagacaacccattcag	Neurogenic locus notch protein 2, partial [Buceros rhinoceros silvestris]	Hucho taimen clone ZB-36 microsatellite sequence	Neurogenic locus notch protein 2 {ECO:0000313|EMBL:KFO89607.1} (Fragment) OS=Buceros rhinoceros silvestris PE=4 SV=1
TR57444_c0_g1	4219	c	(CAA)8aag(CAA)5	469	510	caactgctaccgataacgtaaccactgcttcgacactcgtttctacaagtaatatatctacggaaacaacagctccttcatcaacctcacctaatacaacagcaacccctacaaccgttgtaataacctcctctttgaaccagtcagagacaacccattcagcttcctcgaatagtgctgttacaaatacaaacactgttacagtagcaaatggttctacaccaacaactacagaaacaactgtaacattggagaacagcacacagccgatcgataattctacaacaagtacatcgacatCAACAACAACAACAACAACAACAAaagCAACAACAACAACAAcgccgccagatccctgcagtgtaatttcatgtgtaaatggcacttgtgaaaagttat…	Neurogenic locus notch protein 2, partial [Buceros rhinoceros silvestris]	Hucho taimen clone ZB-36 microsatellite sequence	Neurogenic locus notch protein 2 {ECO:0000313|EMBL:KFO89607.1} (Fragment) OS=Buceros rhinoceros silvestris PE=4 SV=1
TR42243_c0_g1	1119	p2	(TA)7	867	880	tttctcattttctgtgcttattatcttcatgtatttgacaatgttcgattttgtttaagtagctatattaggcatcccctaggaaattttaccagaaatcagcggcatacagaaactttacaagttaaatcaataacagcaaccattaagttacttcacatgtactcgccaattttatctcatcaagcaaaactaccacacgttaatcaagccatctagtgttttgttcaaaatgacgaggcttcacgaggctttcagtgttaaaggtgtttgatatgcatatatttttataagacgtttTATATATATATATAatttgtaagtgttacttcttgtttttgtcacggccgtatcggtttcggcctttcttgataccaaaatcgcgattaactgtgcttt…	#N/A	#N/A	#N/A
TR46593_c0_g1	1075	p3	(AAC)7	1020	1040	aaaacaacgtctttatttgggttaatcacatgtattcgctaaaactagactggcatcataatggaaatggccaccaacgcatatggggatatgattagcatccagaattaatttacaccttaatattgtcagcattaaaattgttaaaattctattacaggaaactcgtgaaatatttagctgtcattttgcctcgatcatatggattcgtgataaaatgtatcattttcctaaggtcggttgcaggcccacaccattatgtccttgttcaaaggcgagaggggcgtaaaactgggaataAACAACAACAACAACAACAACggttaacaaaagggcggttgcagataccaaatata	#N/A	#N/A	#N/A
TR57418_c1_g1	1114	p3	(GGT)6	759	776	gatcagttcaacgcccagtcgttcagtttcttcaatccgtcggcttttacaggaaaacgccgaagaagtacaatgagaagacgtcgtcagtcgcagacgggtggcagtggaggccaggcaccaagcttcgacccgaacagtgtcaaccagttgcaagcaaacatgctggaccccacctcgcagaaactaggagccagtaatggcggtggttccgttggtggggcttcctttgatcccgacaagtttaataccatgcagtttaatttctttaatccccaggcacagtcaggtgggggcggcGGTGGTGGTGGTGGTGGTggatctgctccgaagtttgatgccaaccaagtcaatcaactacagaccaactttctcgacccttctcagtccaagctggga…	loricrin [Anolis carolinensis]	Xenopus tropicalis F-box protein 15, mRNA (cDNA clone IMAGE:7856627), partial cds	Uncharacterized protein {ECO:0000313|Ensembl:ENSACAP00000021006} OS=Anolis carolinensis (Green anole) PE=4 SV=1
TR25346_c0_g1	1268	c	(CAC)6aaccatgg(ACA)5	828	868	caagtggggaccataagatgacaaagctgcatgaagcagttcacagaaaggaagaagtggcttatatctgtgatgagatcggacttcatcgtgtggaaaacccaagtcacactgagggcgctgttactttacacctgtactcccctccgttccaggaatgtaacacttttgatgacaggactggtcacaaagacacagcaaccatgacattctacagcgaatttggcaaacgtgtgtagataagagagtccggtagaacaacttaacagacagttgatagcatgaaataataactccaaaCACCACCACCACCACCACaaccatggACAACAACAACAACAaaagaagagcatggaaaataaaaaaaatgattatcagaaaaaagagctttatatacaa…	Cysteine dioxygenase type 1, partial [Cuculus canorus]	PREDICTED: Gallus gallus cysteine dioxygenase, type I (CDO1), mRNA	Cysteine dioxygenase type 1 {ECO:0000313|EMBL:KFO77684.1} (Fragment) OS=Cuculus canorus (common cuckoo) PE=4 SV=1
TR7329_c0_g1	4163	p2	(AT)6	3373	3384	caaaagtgaaacatattaagtatttaagtattttcaccattttaaaagaagcatataaaactaaacatagactgatgggattttttatggtttgacacacagtgcaacaatgcaaaagcaattttggagatggagcaagtaataaaacattaactgttaggcactaaaagtctcatctatggagttaaaggttaaataaaataacatctaaagcaggtaattgcctctcctaataatataagcagtgtatgtaagatggcgtcatatcgcacagctacacaagtggaatctaggttattcATATATATATATaaatcaaagagacattacacaggttcaatataggtatatttttgttgatgtgaaaattacatccagaaaaatgacaccattttttag…	PREDICTED: staphylococcal nuclease domain-containing protein 1-like [Neolamprologus brichardi]	PREDICTED: Astyanax mexicanus staphylococcal nuclease and tudor domain containing 1 (snd1), mRNA	Uncharacterized protein {ECO:0000313|Ensembl:ENSONIP00000014449} (Fragment) OS=Oreochromis niloticus (Nile tilapia) PE=4 SV=1
TR16418_c0_g2	1504	p3	(GTG)8	366	389	tcgatcatttttgaaaggactgtaagactgtcaaaatgaaggtgttgtcgggagttttgctttgcttgtgtgttgtgatcgtgtctgctaaaagcaaaatccaaagaagtaatgttagaacaagacaggttgtagctgatgaggacccgttcacattgagttttggtacccctgctccaacaggctgtactgatgcgtcatcaaactgtgcaatgcttaaccaacaagttcacatttgtaccgatgccggagctaagatctatgcccaacagaactgtgcattgacctgtggcatgtgcaGTGGTGGTGGTGGTGGTGGTGGTGgaagtacaagttgttacgacgctattaataactgtaacgcctacgacccgtccatgtgctcaaaccctgactaca…	PREDICTED: protein CYR61-like [Astyanax mexicanus]	--	Protein CYR61 {ECO:0000313|EMBL:AHH39693.1} OS=Ictalurus punctatus (Channel catfish) PE=2 SV=1
TR32836_c4_g1	1194	p3	(GGA)7	1	21	GGAGGAGGAGGAGGAGGAGGAtgaagagagtgaagaagaaagtactccagctaagaaacaacagaacaagcaacatactgacaagactccaaaacacgagggaaaaaaggagaaagtaaaccagtctaaaacaccaaaacaagatcagaaaacactgaaacaagaccagagcaaaactccaaaacagcaagagaagaagagtccaggagagtctggtggtgtgacacctgacaacaagtctccaggtccagcaggggatgcaacccagtcagaaaaaaagaagaaaaagaagaagaagaaaaagaacaagaagctggaaaa	PREDICTED: peptidyl-prolyl cis-trans isomerase FKBP1A-like [Oryzias latipes]	PREDICTED: Anas platyrhynchos selenocysteine insertion sequence-binding protein 2-like (LOC101791529), mRNA	Peptidyl-prolyl cis-trans isomerase {ECO:0000256|RuleBase:RU004231} OS=Oryzias latipes (Medaka fish) PE=4 SV=1
TR7152_c0_g1	1956	p3	(AAC)5	1478	1492	aagcccggtcatccgacctacacccctgactggaggcaccttcacaggacagctcataccctaccagaccggcagcggtttctatggttcctcaaatgcatgtgtgtacaaaggtgtcgtctataaacaaagcgagacatggaaagatggctgtaactataactgtgaatgtctggatgcttcccggggacaatacaggtgtacagacaggtgtcctagatatcctttcctgccaccgacatgtcacactgtgccttctaggactgacgtctgctgcagtgaggttgaatgtctgctacaAACAACAACAACAACagcacagagtgtgactcctacagtaaaacaaccagtttcagtctctccatctttaccacctgttccaaaggagtgtgtactata…	PREDICTED: kielin/chordin-like protein [Chrysemys picta bellii]	--	Uncharacterized protein {ECO:0000313|Ensembl:ENSLOCP00000019168} OS=Lepisosteus oculatus (Spotted gar) PE=4 SV=1
TR13882_c0_g1	1549	p3	(TTG)5	649	663	tgtaccctgtttaagaatgtaatgtgcaataacaaatctgctttctgtattcttctttactctgtttttaattgtatttttatatagttactaacactggagtgttattttgtagtcatggcatgtgagtgagtgtataacaaaaatattaaaatgacacaattatttctttactgatgatttttttacatgtaagagaaattgtgataaaatgttttatacaataccgagtaaaactttgtaacggttatgatcattttagatttaaagtaatcacggtaattccatccatagatcaacTTGTTGTTGTTGTTGtttctggagaactggttgctgggtggtggagtggatttattgattttacattgaaaagtgttgatgccattaaatgttggaact…	#N/A	#N/A	#N/A
TR38221_c1_g1	6920	p3	(CAT)5	4504	4518	ggagataagaaacctcaggcaaagcagcttcaaacacgggcagactaccttctcaggatgttaaaaaagcacctagaaggtggaggggtcaggaaagctcctgtgcgaggaagaaaagggaaaaaggtgaaatcaaaggcagagatcacagaggataatctggatgactcggactcgagtgctaaaagtgctaatgacactaaccttagtgttcctgattctagtgctaataaaagaactaataaaaaatctgacaaaaacgataaggacgctaaaaagtcagagtcagaccaccatgagCATCATCATCATCATcaccatcatcatgccaaaagtgacaagaaaaagaagaaaaaagatgacagaaagaagtctgcaaaggcaggtccgatgcatttt…	PREDICTED: chromodomain-helicase-DNA-binding protein 2 isoform X4 [Aquila chrysaetos canadensis]	PREDICTED: Astyanax mexicanus chromodomain-helicase-DNA-binding protein 1-like (LOC103031118), mRNA	Uncharacterized protein {ECO:0000313|Ensembl:ENSTGUP00000008846} OS=Taeniopygia guttata (Zebra finch) PE=4 SV=1
TR23707_c0_g1	3141	p3	(ATA)7	1394	1414	caaactacgatcattgggtccctcccccagcagatgatgacagaagaacaccagcgaacaaagcgatgacagccctcggtcagaacaacatcaacgtcatgaatttgttcaatgttatgtcgacgccactagtgctgaacaagcatacaacttacacggtcgtgatgtctgccgctaagcctagcttgatgcaagcctggatacgggagtaaccctgtgtgcaaacgccgcaatgaacagacaaagactattatgttcagatgttttgtttagatgaagtaaaatttatgataaatttatATAATAATAATAATAATAATAattgttatagtcgaagaagtacctgttaacctcgatcattcgttgtctttaaaaatgtgtagaaattttaatgcatta…	N-acylethanolamine acid amidase precursor [Xenopus (Silurana) tropicalis]	Cyprinus carpio genome assembly common carp genome ,scaffold LG5	Uncharacterized protein {ECO:0000313|Ensembl:ENSXETP00000057513} OS=Xenopus tropicalis (Western clawed frog) PE=2 SV=1
TR23929_c5_g3	2300	p3	(ACA)5	2150	2164	ttcaaatacgacatcatgttgcgctacttatttcgatacattagtgattagctccttattaaagctttcaatcggtacctacattcggccgttggtttaacaccctgaggcaatcctgcgaaacatcaccgtttccttgactttgacacttgacagtatattagctaagccgataacgatgtttaggtaaaaacgacgatatggaaaacttttactgttgatggcatgttatggataaccaaatatcttcatcctcttaagaaggggagtgctcctatgaacaaaggaggaaactacaatACAACAACAACAACAatatggcacaatcgccataaaaccgtattttaaagtctgccgccggagccgcgacttgccgaaatattggggccgcgaccgcgg…	#N/A	#N/A	#N/A
TR40339_c0_g1	4749	p3	(ATC)5	4303	4317	gaggcttgccatgtggtcctctgtgagagaatctctcaggaacttctggagaacctcgtctctggtgctcacaaaatacgtatttaggaactgtagaacacctgatgctagtgctacatatccatctggttcccgcttatcaggtatgagatgggaaccgtcccctgcactaatcttgcgggatctcttggtgctaacttctccctcaaacttctgtggtattgactgggagggctccgtgtccttctgggaggaaggggacataatctcctccatccattgacccagtatcggctcataATCATCATCATCATCttccgagctttcatctgagctactaaagtcatcctcatagaacgtgttggagtcagaagcgctgctgctgctggattctgactc…	PREDICTED: LOW QUALITY PROTEIN: E3 ubiquitin-protein ligase UBR4-like [Lepisosteus oculatus]	PREDICTED: Chelonia mydas ubiquitin protein ligase E3 component n-recognin 4 (UBR4), mRNA	Uncharacterized protein {ECO:0000313|Ensembl:ENSLOCP00000005527} (Fragment) OS=Lepisosteus oculatus (Spotted gar) PE=4 SV=1
TR7324_c0_g1	2312	p3	(CAG)7	1912	1932	ccgttgtatgatttggcttccgttttcatttcagataacatcatactcataacatcatccactatctgtgttgctttcctccatttatctgactggatgtccatggctccatagtcaagctttaaggatgtgtctgtatatccccatctgccaactggtcgtctccatttattgaagttttcgccaatctcttctaagcgtaaatgttcggaaatctcccaggacgttttacgtactgcaccttccaaggtgatgcgactaggctgacttgaacgctggattggcttcttttttctacaaCAGCAGCAGCAGCAGCAGCAGcatgagattagtagtgatgcgacaacaacgatgaccgccacgcaaacttcaagggttgtggaagacttaatcatatct…	--	--	Cysteine string-like protein {ECO:0000313|EMBL:JAC95856.1} OS=Hypsiglena sp. JMG-2014 PE=4 SV=1
TR33224_c0_g1	2497	p3	(TTG)5	119	133	tgaatctttatttatcacaatgatgataacatgtaattcagtaaaagtacaagaaacacaaaatacatttcctttgtgccagttaacaccattagtttgtctttgttttcgtttgtttTTGTTGTTGTTGTTGttttatacatgtagcaagaaaaattctttaaatctgaagaattttttaacatttaaacattgcccaatacctgtacatggaacactgtttcattcaatatgaaacaaatttaaaactcttgacataataccaacaagattttcattaagcattcaaaaatataaccatagtattttcaagtaacataaacacacttatgttcactttatagatataatttactacagttcaatacaagaataaagtgctaggatgttattaaggtg…	PREDICTED: transcription elongation factor B polypeptide 2 [Oryzias latipes]	PREDICTED: Poecilia reticulata transcription elongation factor B polypeptide 2-like (LOC103468942), transcript variant X1, mRNA	Uncharacterized protein {ECO:0000313|Ensembl:ENSGACP00000009572} OS=Gasterosteus aculeatus (Three-spined stickleback) PE=4 SV=1
TR7324_c3_g3	6013	p3	(TGC)6	1786	1803	ttgactggtgctggaggttgtgggccaattactgggctggattgtaaaggcaggcgccctggtataggaatggcgtaaggtgatgttgtctgtccccgtggaatcaactgtggggtggtggggaggtgctggcgctgtagtagcttggccatatccactgcagtcaccactggggtgccacctcccatgattggtctctgaccaaggtcctttcctatcatcgtggtctggggtgccatggatactacccctttgacaatgggtcttccagatgtaggtaatactgacgatactgtggcaTGCTGCTGCTGCTGCTGCtgttgttgttgaccaataagggctcgaagatgttgtgatttgactgcatctatctgttcttgtgtaacgaggtttgttggc…	PREDICTED: eukaryotic translation initiation factor 4E transporter isoform X3 [Latimeria chalumnae]	--	Uncharacterized protein {ECO:0000313|Ensembl:ENSLACP00000019222} OS=Latimeria chalumnae (West Indian ocean coelacanth) PE=4 SV=1
TR35781_c0_g1	2044	p2	(TA)6	517	528	agacttggctgtgtgactggtttaaatttggcagaggtatgtcgaatagagttccctaaaatccctagaatagttctgtggctaatgatggagatcgcaattatagccagtgatatacaggaagtcatagggtccgctatcgccattaacctgctttccagcggaaaagttccaatatgggcgggagttctcattaccggtgctgataccttcacatttttatttcttgaaaattatggtcttcggaagctagaagctttttttggagcccttattactacaatggcgattacatttatgTATATATATATAaccgttgtgccagaccagggtgagattatgaagggattgtttataccatggtgtgaggattgtaataaagatgagattcagcagctc…	Natural resistance-associated macrophage protein 2 [Chelonia mydas]	PREDICTED: Pseudopodoces humilis solute carrier family 11 (proton-coupled divalent metal ion transporter), member 1 (SLC11A1), mRNA	Natural resistance-associated macrophage protein 2 {ECO:0000313|EMBL:EMP28973.1} OS=Chelonia mydas (Green sea-turtle) PE=3 SV=1
TR25214_c1_g1	1507	p3	(TGT)5	342	356	gacacattttctaaatatagtaacaattcaaatgtcagtgtgaccgaagacacattttctaaatatagtaacaattcagatgtcagaaagtatgaccgaagacaccttttctagatatagttttaattaaaatgtcagaaagtctgagaatgatatttttccgttaaatgctctaataattatacaaacaacatgtagatatcaaacttactggtgctgctttgcaaaacttttaagtgagtccgtaaaataagtcattatcatcccaaaattcacagattccaggcttgtcaagcacaaTGTTGTTGTTGTTGTcactagtggacattttcatcacacccacttccttttttccaaacacacaattttacaatgatagaaggatcaaggatacaggtt…	#N/A	#N/A	#N/A
TR25187_c2_g1	1399	p3	(AGC)5	942	956	tcaatgccatcttcaatgggtagctcctctggaaccggcggatcgtccagtggctcgagcagtggatctaacccattctcgcctagcggaagcatgagttctggatctgggtccggatcaagttctagtagcagcggaggttctaacccattctcacccagtggaagtatgagctctggatccggatcagggacaggtacaagcagtagcggaggttcgagcagtagcggaggttcgagcccaatctcaccaagcggaagtatgagctctgggtctggttccggcagcggtgggagttcaAGCAGCAGCAGCAGCggcggcggcggtggggcaagcagcggaggaagctttgacccaaatgccattaactcggtcagcagcaacatgggtaatccagct…	PREDICTED: uncharacterized protein DDB_G0271670-like [Cynoglossus semilaevis]	--	Uncharacterized protein {ECO:0000313|Ensembl:ENSTRUP00000001231} (Fragment) OS=Takifugu rubripes (Japanese pufferfish) PE=4 SV=1
TR9928_c0_g1	1739	p3	(CAA)6	138	155	gtcgatatttttcatgcaactcgggttgtataagtatttgtaattgtagtatataacaagacattttgaactgtttttgaatgcacgttatattgttagctgaaaccgacagtcgccaaatgtcgccaaatgtttagCAACAACAACAACAACAAattacaattgtatatatctatatatttatcgtagcgcatgatataaataaaaagccttaacaaaaccaaaatgaatacagttgatgtttaaaatgcttggcgatggtcgcttttggctatttcgtatatgttgttaagtaaatatttgcaaataagatgttactcctattgaattggattataaattagtttttgaaataagtagtaaccaaacagtgaataacatcaactttaaaaaaagcat…	pol-like protein [Danio rerio]	--	Uncharacterized protein {ECO:0000313|Ensembl:ENSXETP00000052854} (Fragment) OS=Xenopus tropicalis (Western clawed frog) PE=4 SV=1
TR9928_c0_g1	1739	p3	(AAT)7	1719	1739	aactcagatcattctatagtagacatcacaattaataacgtgaacaataaaagaggtcgaggctattttaaactgaacaatagtatattactcgataatacatatcaaactattatccgtaaatcaattttagaaactgctgaaattaataaagaagcaagtccaaatgttttatgggaagtaattaaaggtaacatcagaaacgaaactatcaaattttcatcaaacaggaaaaaaaataacgaaaaaaaagaaaacgatttaaaggaacacatacaagcaattgaacaacgacttttaAATAATAATAATAATAATAAT	pol-like protein [Danio rerio]	--	Uncharacterized protein {ECO:0000313|Ensembl:ENSXETP00000052854} (Fragment) OS=Xenopus tropicalis (Western clawed frog) PE=4 SV=1
TR4342_c0_g1	1450	p4	(CAGA)5	1224	1243	gttatatatgattttcaaaaatcgaaaagaaaatgtacctttttcttttccagattttaaaaatattactcttttattgctaaaatgcttattgttcatgttttatcttttagatccttaaatttacaaagaagaaacgcataggcaataaattacaaaagaaatcaaatcaaggtaatataatgcacgtgacccgtagacaataaacagcctttcatgtgaacaaatttgaacaattaacatcatattttaacaacaggaaagcattttcaccaaaataaatagtcgtcatttatgctgCAGACAGACAGACAGACAGAcactcacatttcacaacctcttgtacacaggagacttttcaaaagtagtgttttgttatcaataaataaataaatagaa…	--	Zebrafish DNA sequence from clone CH211-196D9 in linkage group 1 Contains the gene for a novel protein similar to rodent Eph receptor A6 (Epha6), the 3' end of a novel gene and three CpG islands, complete sequence	--
TR30499_c0_g1	3100	p2	(TG)8	441	456	atgtaacagacgaaactatgaaacaaaagtaccaaaaaacactgcaaatgacattttcaaaggctggagcatcatcaacatactcaataaaatcggaatgacaataaccggaaagatttcgcgaggaacaactttaagacattcatagatatctctatttattccttaaaaagtgccttcgatatgtacccaaatgggttagccaagcaactattatagttgaaaagatcaccaaccttgcaggccgagggtgttgtatagaatacagaaatatttctctttcattgtaagctattttgtTGTGTGTGTGTGTGTGagctgcttttggctgtaacatttccgtgtaggttgatgagttggcattcattcactaggtcgacctatgtattttgtttctat…	PREDICTED: DNA-directed RNA polymerase II subunit RPB1-like [Poecilia formosa]	--	Uncharacterized protein {ECO:0000313|EMBL:KFP01265.1} (Fragment) OS=Calypte anna (Anna's hummingbird) PE=4 SV=1
TR45316_c0_g1	2893	p3	(ATG)7	1264	1284	tcatggttcaacagcaacgtaaaccaaaaacaatggatttattacaaagtgatgatttgccagaaagcaaggtcgaactaaaaccacaaaaatatccaaacaaaaaagaaactgacatggatgaaattgtcaagaacagtaataacaatatgcaaggtggatataaactgaaatatcaagaggatagttacaagatcactgctaaagaagtagaagattacaaagccatgaacactgaaaatgatgctgcctacgatagtaacaatgatgaagaatattatgatgaaaaggatgaggattATGATGATGATGATGATGATGactatgatgatgatgctgatgatgagcaggaagctgcaacaaatgctccttttaaaccaggagactttggtgacatta…	PREDICTED: four-jointed box protein 1 [Latimeria chalumnae]	Carassius auratus clone BJFGF022 microsatellite sequence	Uncharacterized protein {ECO:0000313|Ensembl:ENSLACP00000014731} (Fragment) OS=Latimeria chalumnae (West Indian ocean coelacanth) PE=4 SV=1
TR21705_c0_g1	2219	c	(A)16g(A)12	1	29	AAAAAAAAAAAAAAAAgAAAAAAAAAAAAttaccaaaacatgttgtgtttatcatttgtagtatatttcgatggcgaatggtaaagacttgtaatcaatggctaacgaaaattatggaatacatttgctagcaggaggtgttggaggcacagtaggagctgttttaacttgtcctttagaagttgtaaagactcgtcttcaatcttcagtagcaacattccatactgctagtttacatagtgtcaattcaaacattaacctcatctcaaatagtaatgttaactttcacacttttccaaatgctgtgcagacaacaactggttgtcagg	PREDICTED: solute carrier family 25 member 33 [Callorhinchus milii]	PREDICTED: Cynoglossus semilaevis solute carrier family 25 member 36-A-like (LOC103377954), mRNA	Solute carrier family 25 member 33 {ECO:0000313|EMBL:AFP02094.1} OS=Callorhynchus milii (Elephant fish) PE=2 SV=1
TR46999_c1_g1	1104	p3	(GAT)5	35	49	tgatattgatggagacggaattccaaacgaacaaGATGATGATGATGATggtgatggtattccagacaacaaggaaactgatactgacggcgatggaataccagactacctagatgatgacattgatggagatggcattccaaatgatcaagatgaagacgatgatggggatggaattccagattataaagaaagggataccgacggtgacggaatacccgattacctcgatgatgatattgacggagacggtataccgaatgatcaagataatgatgacgatggcgatggtattcctgatgatcaagaaaaagacaccgatggtgacggaatccctgattatctcgac	hypothetical protein UY3_14629 [Chelonia mydas]	--	Uncharacterized protein {ECO:0000313|EMBL:EMP28295.1} OS=Chelonia mydas (Green sea-turtle) PE=4 SV=1
TR41281_c0_g1	3940	p3	(GTT)6	3902	3919	cttatcttccagaaagttctcatagtattctatgatgtttgggtgactcagcatagatagaaccttcacctcgttgagtgcagcctggcgttcttcctttgtcatctgttccactgggatctgcttgatgatcacatgctttttgtcacttagtcgcttacacagatgtacagttccataggcaccgcgtccaacgacccttattttctcgtagttttccattgacagtactaaaatattttatctaagctggaagaattcaacagatatagagcaagagtatttttgacatttcggataGTTGTTGTTGTTGTTGTTatttcagcatgtcaacatccg	serine/threonine-protein kinase Nek8 [Xenopus (Silurana) tropicalis]	PREDICTED: Chelonia mydas NIMA-related kinase 8 (NEK8), mRNA	NIMA (Never in mitosis gene a)-related kinase 8 {ECO:0000313|EMBL:AAH75274.1} OS=Xenopus tropicalis (Western clawed frog) PE=2 SV=1
TR38268_c0_g1	2935	c	(T)10c(T)11	559	580	ctttttttttgtattctagaatgtcgattgctttaaaatatcttcaatgtatgttcatttcaaagtgatatatccttttaattgttcgttcatactgaaaatgattatacaaaattataaattgtttaataccgactcaaacaattttatttgctagcaaaaaaataacatggaatctaccacatagaccttaacttcagcataattatgttttctctttttcgacagatcaacaatggacagtgaagcgatttaactgtacatcgattatgatgcgaatattctatgaggtacggtgcaTTTTTTTTTTcTTTTTTTTTTTcgattgatcaacaataggacagtgaaacaatctaactgtatatggcttatgttgcgaatagtcgatacggtacggta…	#N/A	#N/A	#N/A
TR16403_c4_g1	1493	p2	(AT)6	799	810	tttcttttaaactaataattgttctgtcttttggctgttcatgctctgtggcaaaatgttttgttactgactgtcccaaggcctcaatccaccgtgttcctttttttcactaatttgattgtaatgtcttttttaaagtagcctccttttccttttacttttgtctgtgtatggtggctgtgtttcctgtttgacagataggcagatatttaagttattaaaagtcttcacaggcaaatataggtggtggaacaataaaagtagttttcatttgtattttctctagagcttttactatacATATATATATATcacagtctgttttaaaccattttagcctaattcaacactgtcaagggatataaccctttctttatatctcttatttaagcaaaagta…	PREDICTED: transmembrane protein C5orf28 homolog [Callorhinchus milii]	--	Transmembrane protein C5orf28 {ECO:0000313|EMBL:EMP42405.1} (Fragment) OS=Chelonia mydas (Green sea-turtle) PE=4 SV=1
TR30138_c11_g1	2172	c	(T)10aca(T)10	1658	1680	aatgtttagcaacgattaaagatattatgaaatcaaatctgagaatccctcccaaatattgccctgctttgtcatctccgtcctcttgcagtgtttcaggggcatgaacaacaacaggaaaggcattcttaaacgttgctagggcatctgcatgacttgaccatcttgtttcacataaggttcgcagtttggttctctgttccatttctgctcttgttgtagcatcttgtgataactcgttagtctataccccccttactcttcaatttttattgcattttttacatgcacctatttttgTTTTTTTTTTacaTTTTTTTTTTcatttctgtgaaaaaagtgtaggcacgtgcctacagtgcctaaaggaagctacgcccctgcacctatttttgtttt…	PREDICTED: 52 kDa repressor of the inhibitor of the protein kinase-like [Latimeria chalumnae]	--	Uncharacterized protein {ECO:0000313|Ensembl:ENSLACP00000007008} (Fragment) OS=Latimeria chalumnae (West Indian ocean coelacanth) PE=4 SV=1
TR23937_c2_g1	7208	p3	(TGT)5	4022	4036	agcaatattactacttcctcctctgaattttcttcaagaatgtcttctctccactatcattaactgtcaaaagtagcctttctttcaaaatctaccttttctacctccacttggagagcactgaatggtcctccttggagaggattggcttagatgtattccaactccaacccaaaggcggactcgaaagcattttctctccacaaataagccaaggaaaatagttttctaaataagaggctcttttattcccaataattgcctcatatctgtgttttagttaattgtttttgctgctgcTGTTGTTGTTGTTGTcattgttgtcagcagataccacaagtggtgtcttgactgttaatgaaggatcaggcttgtaaaattcaagagtgtgtagctctt…	PREDICTED: TNFAIP3-interacting protein 1, partial [Apaloderma vittatum]	--	Uncharacterized protein {ECO:0000313|Ensembl:ENSACAP00000010560} OS=Anolis carolinensis (Green anole) PE=4 SV=2
TR20168_c0_g1	1612	c	(T)10atcaaaattaattgcttggccgctccattcagtcagtgctagtgg(AT)12	1438	1516	cctctggctgcctcaggggcaagaataactggacatctggcccatgaactcattcgacagaacaagaaatacgcctttggatcagcctgcatagggggtgggcaaggcatagctgtcatcttggaaaagtgctgagtgtgaaaatacaactctaccttgtgttcactggtgtatttacttgtagtccagggaccaaagaatgaagttctttaaggacatgactttgtatctgtgataaattaattattcttcaagctaagaactaaatggtttgaatggggcatacaggataaatctataTTTTTTTTTTatcaaaattaattgcttggccgctccattcagtcagtgctagtggATATATATATATATATATATATATgaatcatagacaagagtgat…	PREDICTED: 3-ketoacyl-CoA thiolase, mitochondrial-like [Oreochromis niloticus]	PREDICTED: Oryzias latipes acetyl-CoA acyltransferase 2 (acaa2), mRNA	Uncharacterized protein {ECO:0000313|Ensembl:ENSONIP00000018092} (Fragment) OS=Oreochromis niloticus (Nile tilapia) PE=3 SV=1
TR39430_c0_g1	3230	p3	(AGC)9	3170	3196	ttttgataacttcaagcattaaaatggagatatgtgcatctctacaaatgcaatttgaacagaaacacaagttaaaaaactcttctccactcactcatctctgtttgaattctttgccccagagttttgtattgactgaaaaaaataacctgtttgagtatttgtttaatttgcttgaattttattattaaattttattccattcccccaattttgaagttttacagttgcatatataaaacaatttgctttaagcattgcttagaatggcaaataaaaaggagaagtagtagtggtagtAGCAGCAGCAGCAGCAGCAGCAGCAGCgaaagcaagacgaaggaatctgcggctaaagcga	Unconventional myosin-Ib, partial [Merops nubicus]	PREDICTED: Calypte anna myosin IB (MYO1B), transcript variant X2, mRNA	Unconventional myosin-Ib {ECO:0000313|EMBL:KFP65580.1} (Fragment) OS=Cariama cristata (Red-legged seriema) PE=4 SV=1
TR28926_c0_g1	2558	p3	(CAT)6	723	740	ccatgtttactacatttccagtcagaggctccttcatttgaagtgaaatttctgcactagtttcatcttcatctagctggctattatctccagacacctgtcctggcgatactgaggattccatcacatcagactcattatttgtgtcaaacaagttacgtttaacatttgttgcttcacatacatctaaaacctcttgaccatgattaaatccattatccgtttcttgtctgacaaacatcaaatcatgttctgaaattttgtgttcttctttgttcttctgtttggaatgcattgataCATCATCATCATCATCATcaaaggaattttctatcattcctgttctttcatcagcaagacattgggcattaacttttgtcaatttaaaatcatcagtgc…	PREDICTED: uncharacterized protein si:ch211-250g4.3 isoform X2 [Danio rerio]	--	Uncharacterized protein {ECO:0000313|Ensembl:ENSAPLP00000006058} (Fragment) OS=Anas platyrhynchos (Mallard) PE=4 SV=1
TR51378_c0_g1	1967	p3	(TTA)6	240	257	tgtcaatatataaatagatgaaaagggaactttgatagccaccgaacacgacaaatatgaaaatactgcatgctcggtttgattgagcctgttcatcggcagtaatgggattgcatattaccgccctttttggacacacagaaaactgaagttcaggcatacgcctgaaaacttttacccatgtatctatatatttttaaactgttatcacttaacttatttttttcttcttcttctgcTTATTATTATTATTATTAtgaaaaaatgtaaaatttagtacattttgatgtaaaccacagactcggtcgagacagaacacaaaacaacaatgactagatcttttatgtgcatttcatcatgattaattgtttccgtgttattttatttgatatagcacag…	PREDICTED: peptidyl-glycine alpha-amidating monooxygenase B-like [Astyanax mexicanus]	Cyprinus carpio genome assembly common carp genome ,scaffold 000002235	Peptidyl-glycine alpha-amidating monooxygenase {ECO:0000313|EMBL:AFO94784.1} OS=Callorhynchus milii (Elephant fish) PE=2 SV=1
TR45886_c0_g1	4085	p3	(AAG)5	124	138	aaactgtcctgaaacgtcgccgttctcaagcaatggacatggattacactgtgaagtttaccaattatggtcttgcaggtgttcctagaacaaagagacagttatctcttcttatgaaaaggaAAGAAGAAGAAGAAGaaaagcagagaaaacaagcagaggctcaacattcaatggaggacattgttcatgccgagatactgatgtctctgaaaagtgcctctaaagatgaagtggaatctgaaagtatggaagtggaagagggtgtggaaaatatagtcatctttcagagtggtgaagatgctgaggctgatgatgacggggatgaaaccgacactgatcatgaaacaaatataaaagaagaagatgctagtgagtcagaacatgaagtgtccactg…	PREDICTED: zinc finger protein 236-like [Xiphophorus maculatus]	--	Uncharacterized protein {ECO:0000313|Ensembl:ENSPFOP00000022429} OS=Poecilia formosa (Amazon molly) PE=4 SV=1
TR55628_c0_g1	1804	p3	(CGG)5	1576	1590	ccctattcctgtgtttgcaccggtgatgacaacagtttttccctctatccggttgttactttggcattcgacgttccagcgaatatatttccgtaacaagaatacagataaaataatcacagaaattataattggcactgcaaaagtgatatcctcaaaatccacgtcgttgtcatcctgccatatgatagttttctctctaggggaggtcggcatcttaggaggcgagctgtccacgtgtttgtggtgtcctgctggtttctcatggctggtcttcgtcggcggtgtctgatgttttgtCGGCGGCGGCGGCGGcgccttctttgcgtttccatgcgtcattacttgcgagcgttttctcttccacaggaattatatacgaaaaattaactcagattt…	PREDICTED: retinol dehydrogenase 11-like [Latimeria chalumnae]	--	Uncharacterized protein {ECO:0000313|Ensembl:ENSLACP00000015991} OS=Latimeria chalumnae (West Indian ocean coelacanth) PE=3 SV=2
TR35346_c0_g11	1451	p3	(TGT)6	306	323	aatgtgctaaaatatgtctgactttgaatagtcgagcgtgcagtcatttccgactggctcttgttatgataaattcttttcatgtacaggttctggcaccagacggttattttcattattaagaactaacttgtgattttagttgcagttttaacactgtgctatcatttaaaatttgtatcgttacaaacttcgctaccgggggcatatgtgttttccgaacacagcttcttgttttattatgtctttatgtcattactctataaaattaatctccaggttttcagagagcagaataaaTGTTGTTGTTGTTGTTGTtaggctgaatgaaaatttggggtagtatatggtaataagccacattgtctgtccatccaatattcaagttttccccgtatc…	#N/A	#N/A	#N/A
TR7508_c0_g1	1495	p3	(ATC)17	1420	1470	ttcagtcctaaagagaagttgcaccagacaattcacagaacaacatggacatgttttcttgatttttcttcagaatatttctttaaaatatcattttattgtgctgctactcaaatacattctttttgtttcttgagatattgttttccatttttattttcttgaaaatcttaaagatattccttccgaaagttttttacttcatgtttatttattagcaacaccataattaccttaaaaagttttttttatgtgacctccacttgttgtgtatttatcatcatcaccatcatcatcaatATCATCATCATCATCATCATCATCATCATCATCATCATCATCATCATCATCtttcattaatagtgatgccattatt	PREDICTED: probable palmitoyltransferase ZDHHC11 isoform X2 [Poecilia formosa]	Zebrafish DNA sequence from clone CH211-142E15 in linkage group 1, complete sequence	Palmitoyltransferase {ECO:0000256|RuleBase:RU079119} OS=Xiphophorus maculatus (Southern platyfish) PE=3 SV=1
TR24624_c0_g1	2256	p4	(TCAA)18	2183	2254	gaaaactttcacgaaagtaagtaagttcttgaatgcaagataaatatcttaacattcaaatttgatcgttattgcctccaactgccaaagcatacatattttagttttcaggattctttttaacttttcatgataaaagtcaactaacagtataaacggaacatttttggaacgcttcttctgtcgtcattgcatcacttgtcgggtgatatttataatcagaatatgtaacccattttgcgccgataataacgaacgaaccaacaaatcaatcactcaatcactcaatcactcactcacTCAATCAATCAATCAATCAATCAATCAATCAATCAATCAATCAATCAATCAATCAATCAATCAATCAATCAAat	PREDICTED: toll-like receptor 13-like [Xenopus (Silurana) tropicalis]	Zebrafish DNA sequence from clone DKEY-160O24 in linkage group 14, complete sequence	Uncharacterized protein {ECO:0000313|Ensembl:ENSACAP00000018176} (Fragment) OS=Anolis carolinensis (Green anole) PE=4 SV=1
TR43442_c0_g1	1656	p3	(ATC)5	174	188	agaaagtcagaccaaaaatcctatactgtgatacattttacgggatatttaaaatcctggcctacatcaaaaataaacattagtagtgaagacgatatcgaagacaattgtaactttttaagttgtttagttgccatcggacaatctcggacttctgtgaatcaaaataatttATCATCATCATCATCgtcatcatatactgccgggagcacaccagtgtccaacatatcatgtggtttggattttagacctatggaatatatgtttagaatatcaccagatgggaaattaacatttatagaccaagcgactacggttgttttgggatatttgcctcaggaactcatcggcacatcggtgtatgagtactaccatcaagatgatctgacacgtatggcc…	PREDICTED: aryl hydrocarbon receptor nuclear translocator-like protein 1-like isoform X2 [Oreochromis niloticus]	--	Uncharacterized protein {ECO:0000313|Ensembl:ENSONIP00000013802} OS=Oreochromis niloticus (Nile tilapia) PE=4 SV=1
TR31983_c1_g13	4986	p3	(CAG)5	87	101	ctcgacttctaagcatacagactcaacttcagtcattacatgacaaattcgcacaggctgaggcgggaagacagcagcagcaacaaCAGCAGCAGCAGCAGgttagtcagcctacgagaccagataacagagacaagaggtccaagtctccagcagaagggcggccagacacacagccacaggatggatcccagcaccagtccggaggcccaagtgttacattttcttcaaacgatgaagtgtattataagatgagaaatcagcgtatgttgcgtgaggagctccgagacaaaaagaaacagctggagtcaatcatgaagaaagatcgtaacaagaaacagtattataagaaccaggataatcagagtgatacagtctcgtacagcacagaaatgttcg…	PREDICTED: pericentriolar material 1 protein isoform X3 [Callorhinchus milii]	Cyprinus carpio genome assembly common carp genome ,scaffold 000000006	Pericentriolar material 1 protein {ECO:0000313|EMBL:AFO93701.1} (Fragment) OS=Callorhynchus milii (Elephant fish) PE=2 SV=1
TR51786_c3_g5	1627	p3	(AAC)5	1205	1219	ggtcaactgaagccgcttcatttattcttgaagaactttttttcaataaggctgctttgttattttggacaatcgttgaataagtaactgtctaatttactatccatgatttaaatttagcaatcatgtataaattaataggaaattgataatattgatatttgagggatgtaatgtttgttagtttacacttttccaagctgctttttgtgtggcttttggcgatttggtgatagtgaatatggacagacattagaagttaaatatataagcggagtatcacctacgtataatttagaaAACAACAACAACAACagtgcccgctggtaattaaaaatcagttaaacgctaatcacacctttaatagagtgaagaaaaacctttcataacagcaagcta…	#N/A	#N/A	#N/A
TR25901_c0_g1	2830	p3	(AAC)11	42	74	atgcaatgactgtgtttatgtggacaaaaattgcaaatacaAACAACAACAACAACAACAACAACAACAACAACgttacccttatcctgcgcaacacagcttcaagtgataaactgatgctgaaattacatcctttaatggcaatatcaacagtgcgatccaaggagaaagatgttggaatgaatctttctgttgggaagtggtcgagtgttgcattaactatggacattacatcaaacgaaataaagctttttgtcaatggaatagaagtgtactcaaatacatttagacttgcctcatcacacatcctgaaagaaaatgatacactggaatttcaaggagacatgatggtttcttcgtttactgttttgcca	PREDICTED: LOW QUALITY PROTEIN: SCO-spondin [Poecilia formosa]	Cyprinus carpio genome assembly common carp genome ,scaffold 000002605	Uncharacterized protein {ECO:0000313|Ensembl:ENSGACP00000021217} (Fragment) OS=Gasterosteus aculeatus (Three-spined stickleback) PE=4 SV=1
TR44721_c0_g1	2258	p3	(TGT)5	958	972	ccttctaaagcacctaactctataatccgttgttgaaatgaggcgggagcaccaatcatgggatctgaatatttcggttcttcttgttcttttatactgttgttactgttttttcttcctgagacattattctgtacaactatgggtcgcatactattgcctgggtatttgcgttgtgtgttgagcatgttatttgacgatgataatgactgatttacactgccaccagtaggcactaatttaggaggatatgagtttgtgttactactagatacactagcattccttcctgtgccttgcTGTTGTTGTTGTTGTgatgacagagctgatgatgatgatgctagctgtacaggttgtcctgagtttccgttgttgttgttcggactccataacgttccc…	PREDICTED: uncharacterized protein LOC105356683 isoform X1 [Oryzias latipes]	--	Dentin sialophosphoprotein {ECO:0000313|EMBL:ETE66066.1} (Fragment) OS=Ophiophagus hannah (King cobra) PE=4 SV=1
TR54131_c0_g1	1121	p3	(TTG)5	247	261	atctcaagaatcctataggctgaaaaggagacatgtctccattacagcaaatcagatcattgagatttgacactggtttccattctcagttttataaccttcggcactgaagtattcctaagcaggcaccagcagaaagtgggcaccatcaataaagtaattaacacttgttgtcacactgtctgtgttctaggagatgagattatcacaataattaaactgttgcacagtaaagagttcaaaactTTGTTGTTGTTGTTGgtcaatacttccatcatcagattctgaacaatcttcacacctttttgctaatcgaagttcctataatgtcaatgagatcatgatttctctttcttcttctctgcctcggctttagcttccactgcctcgtgctccttt…	proteasome subunit alpha type-4 [Danio rerio]	PREDICTED: Esox lucius proteasome subunit alpha type-4 (LOC105018690), mRNA	Uncharacterized protein {ECO:0000313|Ensembl:ENSDARP00000067511} OS=Danio rerio (Zebrafish) PE=2 SV=1
TR48623_c0_g1	1567	p4	(GGAC)5	5	24	ggaaGGACGGACGGACGGACGGACggtccgattactatatgcctcccttcgggggcataaaaaatacgcctatcagaaattgccacaataagaaaaaaaaacagcctcgcagccaaaaaagtagagaggaaaagagactgatggagtgcaaatatgtccggtcgactaactaccttcgttactcaataagctacacctcaaaagtagagaggaaaagagactgatggagtgcaaatatgtccggtcgactaactaccttcgttactcaataagctacacctctttgttaacgtacaacatgtttgtaacaagtctgtcttctcc	#N/A	#N/A	#N/A
TR9020_c4_g2	4222	p3	(AAC)6	3481	3498	cttggttgaacagcagaaaatttcaatgtttttgaggggctggaggcccaattgtgaatgagggatttgaggggctggaggccttactatgaatgaggacttttaggggctataggcctaactatgaatgagggattttgaagggctgcaggcccaactgtggatgagtgattgatagtatattaacatcattggatatagtataagttgagggtgataatatgttgtgcaagcaaacaggaaggatagtgaacgatgtgcatgaagagtttgtttacaattaatgcaatgtggtatattAACAACAACAACAACAACaaacctgatcgatcaggatataaattaatggcgatgtatatttaacgactagtggacgttgaaatgatatgtaaaccgtct…	--	--	Uncharacterized protein {ECO:0000313|Ensembl:ENSLOCP00000019022} (Fragment) OS=Lepisosteus oculatus (Spotted gar) PE=4 SV=1
TR8196_c0_g1	1677	p3	(AAT)5	1388	1402	tgaagagtttgggcatcagtcaaatcacacagaaactggaaaacaacaaggtgattcgtcattggactcaagcaataattctgaaaacattgaccgcccagtgaatcatggttattttatattggctcctgaagtcttgctagaagcccgtcggaaccaaatgacacacgtggactcacagccagatagctgccacacatacgaccatttgattcacgttacaaaggacagttccacgtatgatcacgttagttttgaaaaaagattagattgtgcagacaagattatttaaataaattaAATAATAATAATAATatttcaaaacaatgtaagctaattacaagttgttagattaaacatatgagctataagatattttcaaggatttgaggtataaga…	--	Cyprinus carpio genome assembly common carp genome ,scaffold 000000722	--
TR40669_c0_g3	1423	p2	(TA)7	206	219	gttttataaccttgggcaaaggttattttgatccttttgaacctttacaccatatatgcatttcatcgcatgtgcgacaagtgtagatccagatcagccagcatatccatgttttctgctcaggatctgcattaaacgctttttggtctgaaatacaggtgtgccaggtaatctccatctactctgtttgcccacacccgaaaggTATATATATATATAttgtggagtaaaggttagattatgagcattctttgaagattttcttattgtggatatataaacatacaaaccaagtcatgagaataaatttaatgttattcttctgaaaataacaacatcttttgataatccttggtgtatttcaaatttatattgcttatgataggtttgtgatgtagg…	#N/A	#N/A	#N/A
TR17306_c2_g1	9747	p3	(CTG)5	2174	2188	tacatcaccgggtcaaagaacgcgaggtcgtgccagcctatcttccgaccaagtatatatttcagtacatgacgattcaggaacagaggacacatctcattttgtagaagacacagacctattattcttccaacatttctaaatgcatttagccgttcttgagaagctcttccaagacgaggagtgtagtaccctcgtttaccgggctgccagaacaaaggagcgttatcttcaaggtcatcttcctcgtcaatgtcactccgtctgtccgtttgtaaggacgactttttcttcttaccaCTGCTGCTGCTGCTGgctgacaagttgaaaatgtccagatccagcaacgcttctgcattcaactctctttgttccctgttatgtgacatacagacatct…	PREDICTED: E3 ubiquitin-protein ligase UBR5-like [Lepisosteus oculatus]	PREDICTED: Melopsittacus undulatus ubiquitin protein ligase E3 component n-recognin 5 (UBR5), mRNA	Uncharacterized protein {ECO:0000313|Ensembl:ENSLOCP00000012128} OS=Lepisosteus oculatus (Spotted gar) PE=4 SV=1
TR51444_c0_g2	2043	p2	(AT)6	1940	1951	acttgggggcctgttcagtttgaaataaaggcatgttcttaatactgtgttcaatttgatcttacaaacgatgaaatatcatttcatttaaacaaaataatatatattttaaacgaattaataccactatataagtatgaaatgtcaatttaagggcttattttatatacacgtaattacagaccttttattgagatctgctgctgaagatgtttgattcagttggctgaaatttacagttagcagtttgtctattttgatgcatgtgccttttttattcaagagctttcttcttacgtaATATATATATATggcaagatattgatgtttttgtgaattttagaatagacttttagataagtgcgtcatttaataaacattttgaatacagtcatgtac…	PREDICTED: cornifelin homolog [Astyanax mexicanus]	--	Uncharacterized protein {ECO:0000313|Ensembl:ENSAMXP00000019415} (Fragment) OS=Astyanax mexicanus (Blind cave fish) PE=4 SV=1
TR41603_c1_g1	1375	p2	(CT)6	1298	1309	aaatgaagtgtatccatctacggtatggttacactttaattggtatattttgataagacaggtaaatgttttaatttccaagcttacactaagacaaaaggtaatacgcagtctgtttattctcaacttcatgaactgtaaattaaacattacaaatgtatgtatcgagtaaatctaaaacatcttaaagtgatttgttaaatagtgaaatgtattaagaaatgagaggtattctctgttctctttttcgttagttatttgtggcgtcctatttgaaatgacatacttataacaaacatgCTCTCTCTCTCTcatcctctcttctttttcgctgcgtgaggaggctgtgttttgtgagtgtggcaattcctgatatgc	#N/A	#N/A	#N/A
TR25876_c2_g1	3359	p3	(CAA)10	1	30	CAACAACAACAACAACAACAACAACAACAAcacaatggatgctgagataaacagtcatatgtccgaacctccagacaaacatggacatttcaaaccaacagtacagatgtcagcaagatctgatgagccacccaggttaatggaccagttaattgaagagcagcaaagagaggcaaataataaacagaacttgagagcaccaagtccagaaccagttgaaacttttaccccggaagctgttgtgaactcgcattctgctccccagcaacagacgacattagaacagcagacgacaaatacttcacatgacatgagagcccctgatgatgt	PREDICTED: LIM domain only protein 7-like, partial [Apaloderma vittatum]	PREDICTED: Poecilia formosa fibroblast growth factor 12 (LOC103148287), transcript variant X2, mRNA	Uncharacterized protein {ECO:0000313|Ensembl:ENSPSIP00000016728} OS=Pelodiscus sinensis (Chinese softshell turtle) PE=4 SV=1
TR5294_c0_g1	2553	p2	(TC)7	2466	2479	tcaatattatggtagtgttgttagtaaatgaaacttcattcataaaatgaacatttttgttcaatgtaaaggttcatttcttaatgttctttcacttaatgcacgtcccaggtgtgttttttaacatttcaaacctaatttgtttgataataagtaatgtgattctctatttaaaatagtgacacatttgcaaggctgttatagtcgagaaagaattaatctgtacaatactgtcttccatattcagataaccaatagttaattgtttttcttatttgaataacatttaatatctatgctTCTCTCTCTCTCTCcctctctctctttctgtctgactttcactccgtcaaagctactctctaaccctctgactgtaacacaatatttt	PREDICTED: protein diaphanous homolog 2 isoform X2 [Columba livia]	Zebrafish DNA sequence from clone DKEY-162L4 in linkage group 3, complete sequence	Diaphanous homologue {ECO:0000313|EMBL:BAB20321.1} OS=Gallus gallus (Chicken) PE=2 SV=1
TR28712_c11_g2	1189	p2	(TA)6	1103	1114	tctgacggagtagcaggaaacacaaattatggccaagtgttttttaaaagagtgaaaattgttgagcagaagtcaagattttcaatcaaaactacccactacttttaacttgcgaatgttttaattcataatcactatcaacagtttgaagattattgtgatctccaaagacaaggttacgacgtaatactatatcgacctcataacacgactggtaagtttgtaacttaataagaagtatttttcatacaaacaagtacttttcaatgttcgtttgaacgttcaatttcccagcttttcTATATATATATActcaacaaaaataaaaagcatccaccttcctatcttaaattttgtaaaatttgaaaacgaaaacttagaattctg	#N/A	#N/A	#N/A
TR58337_c0_g1	1499	p3	(TCA)5	1441	1455	cctgataattgaagatattttctactgtaacacaataaacacacttggtgtattttttatattgtttttgttaaatggctgttattatttgttttagagaggaaatttagtatctatagtttacgaaattaagttaatgagtgttgtttaactagttaggataatttgataaattgctgattttttaccacattccacagtataatgctgatgttgtaacattccatagctgtacaagatttctccacctttacacacatctgagaagttcacatatctataaatgaagtaatattacagTCATCATCATCATCAccataacttgatgactgacttaccttgtgttgtctttataaaac	#N/A	#N/A	#N/A
TR9347_c0_g1	2813	p3	(AAC)5	1712	1726	acgtcaagaaatacgccgacgtggtattttgtattcatggcactgatcccactccatacttaaagtgtatgtatgacgaaaacgaaccagtaaccagtctgtacgtccgcggagacgacatgccaaactttcccgccagaaaatttattgaagaagtcatgccagtacattttcttccatatactgaatacgtgtcttcaactaaaatacgtaaagaagtatacaacgcgtccatgttcggacctcatgcgaacgatgatgaccatcttatgttttactgaaaaaaagaaaacacaataaAACAACAACAACAACaatcccaactaagaacatttgacgtaacttgaattggttgaaaagaatgttttaatacgcactgtgctacgataggcttatgtc…	--	--	--
TR33953_c0_g1	1289	p3	(AAC)5	3	17	tgAACAACAACAACAACtcgaaaaacaaaaacaatttttttacgtttgatacaaatggattccccgttaaatctggcccatcagcagggtcgaaaagctgatatgctgctgaaatcagggaaatatgaggaagcagtttcctgtcacaacagagcagcagaataccttcttgaagccatgcagcagacaagatatgcacctgccctggagtcattgaggcttcagcatgcacaccatcttaaacagacagaaaaactgtatgatcgccagagacgagcacacatgttgcagatcaaacagaacaaattacagctgtg	PREDICTED: nuclear receptor-binding factor 2 [Melopsittacus undulatus]	--	Uncharacterized protein {ECO:0000313|Ensembl:ENSGALP00000004671} OS=Gallus gallus (Chicken) PE=4 SV=2
TR54535_c0_g1	2812	c	(A)11cactaaaaaatattaaatt(A)11gaagagataattcaacctcaacaaaaatatgatatatatttgctaaaaaaaatgagaaaaaaacgtaaaaaaatat(A)10	1296	1422	aaatgtttttttttatttcacagaatttgaacaaattataaataaattgcttttaaagtattttgaatatgtatttgtatgtattacttaaataattgcttgtttattcatttcttaacttcaatgattctgatcattaaattgatttttacaaactacaattttgattattctgcatttgaacctttcttttaaaaacagaaacaattaagtacaagtgaaataatttatgagataacattaagcagtatatgggctttgttcttgttataccaaaaaaatatataaaatataaaatccAAAAAAAAAAAcactaaaaaatattaaattAAAAAAAAAAAgaagagataattcaacctcaacaaaaatatgatatatatttgctaaaaaaaatgagaa…	--	--	Uncharacterized protein {ECO:0000313|Ensembl:ENSLACP00000005956} (Fragment) OS=Latimeria chalumnae (West Indian ocean coelacanth) PE=4 SV=1
TR51737_c1_g1	2289	p3	(ATG)23	1	69	ATGATGATGATGATGATGATGATGATGATGATGATGATGATGATGATGATGATGATGATGATGATGATGattatgattatgataataataataatctgcaccttttttgcagcacccgcccttttcgcagccccatgttttttttaaatcctgattctgaatacagcacttattgcaatctacacaaccccttatgtccagatatcccactcccgctgatagaaactcataacaaaaatattcagtggtgggttctatggttatcaattataataaactcttccaggttgcctcttgacttatcttctttattattagtttattatagacccgtctcctgaaggaatgcatggatgaattttcaaattt	unnamed protein product, partial [Tetraodon nigroviridis]	Gadus morhua isolate FS54 clone 2 hemoglobin beta chain, interglobin, and hemoglobin alpha chain genes, complete cds	Chromosome undetermined SCAF5157, whole genome shotgun sequence {ECO:0000313|EMBL:CAF88611.1} (Fragment) OS=Tetraodon nigroviridis (Spotted green pufferfish) PE=4 SV=1
TR38298_c0_g2	3669	p3	(GAG)5	1787	1801	gatgccacagagatcacagagatggctgaagctgagacttctacagatgccaagaaatcgaaacacacaccaatcattctcaagacaatggaggaagtggagcaacttgtcaacgagtataatacagagggtagccgttctcctcagacctacaggctcggtcctgaatttctctccaagagggtcaaagatccagaagatagaaaattcttgcaatcagaaatagtttcaatcacatctgtaagctctctgtcagaggtaggtgacaaaagtatgaaaataaatgaattaattggagatGAGGAGGAGGAGGAGtatggtgagaaaaatgatgaagaagagcagggtgatgatgataatgatgaggaggaggagaaggaggaatatgacgaggaagag…	hypothetical protein UY3_06274 [Chelonia mydas]	PREDICTED: Cynoglossus semilaevis leiomodin-2-like (LOC103382826), mRNA	Uncharacterized protein {ECO:0000313|EMBL:EMP36541.1} OS=Chelonia mydas (Green sea-turtle) PE=4 SV=1
TR36022_c2_g2	12111	c	(A)11tgaattctataac(A)10	655	688	atagtgccaaatattgatgaagtgtggcattggaatttcccccttctctgctttcttcctacatcagagtagttaatgaatcctgtaaatactgatgggcaccattgagttatcttccttggaaatataatagcaccttgagtacagaagacaaagcataatatgaccaacttagccttgcaactcaaacaagattgtgtattatgaagttgtggctatgaagcaaaatgttgtgattatgaaatcctatgaagcaagcttggggataagaggaaagaattcttggtcagtgctgaaggtAAAAAAAAAAAtgaattctataacAAAAAAAAAAcaacaacatggaagttcttcttgcaagtaggagctgtaaatataatctcttataaggttactagc…	#N/A	#N/A	#N/A
TR36022_c2_g2	12111	p2	(TG)6	6103	6114	gcaatggataaagaaatttcctgaaaggatgaaaacagtgatttgcatcatgatcatgtatggtaaaaaaaatgtgagatacataaaaataagttgaagggagttaaactttattttgctcttggaataactgacatgagtattgtacaggaagaacaatgatttaaaaaaaagttgaatactggaggggtataattcactgatgacaagtgtgatacatttatctttgaaatgttcaattaagaattaaattcaatatgcacataaatgttggtttattaagtgatcttgcatgattttTGTGTGTGTGTGtttataactgtcatattaagtagtgggttctgtgcttattaaggataaaagttctatacttcttaaattaagaatcttaatgaaatc…	#N/A	#N/A	#N/A
TR970_c0_g1	1606	p3	(AAC)5	582	596	cagatcctaataccccaaattccaacatgatgcacgcggatccttcaatggacgctctctctgatacaaacactgactttccaaatccagtacttgatgaaattctacagtcatttaacacgccaactaccgataacttggatgttaatatggcacttgtttattccacaattgaaagtttaacaagccagacacccacatccgtgtcgacaaatgttaaaagtccaagtttaactgtttcgaaccataataaacctcagaaaaaatctacagctcatccagtggcatacttagcggccaAACAACAACAACAACcagaaagaaagatggataaaccgttgttacgtagcttcttgacaatgccgaaggaggcgatccctagacagccccctggtggat…	--	--	--
TR11399_c0_g2	1368	p4	(TCAT)6	1345	1368	ggacagttatcggtctcgcataaatcgatatacaatgattaaaatattaagtacacgtgatagcgaaaactgtgattcttaattcaaggtcagttgaaaaggtcaagttgaaagttcatgtagaaaatctttttgttatgagtatgacatttatgtttaaaacataactttagcattcgtccttacctgaaacgaaacagtgagagcggggcagcaagcagttcaaaaagactttttttaaacaacgataaagaatttagttatttaatagttatactactaggatatataaaacaagacTCATTCATTCATTCATTCATTCAT	--	Zebrafish DNA sequence from clone CH211-184B9 in linkage group 22 Contains eight genes for novel proteins containing trypsin domains and three CpG islands, complete sequence	--
TR23850_c1_g2	3047	p3	(TTG)5	2310	2324	ctgtcaccaacccaccgtctacccccagtaaaagccaagaagaaggcttcaaaaagatgttttgtttgtgctaaaaagacaggactggcctgcagctacacatgcagatgtggcaacaatttttgtgctagccatcggtatgcagagtcgcacgagtgcacatttgattataaaacggagggcaggaaacttctggaacagaacaacccagttgttaatgcaccaaaactccccaagatttgaaaccagtcaagaatttagaaagttgttacaagacacagtctgatttgttcatgttgtTTGTTGTTGTTGTTGctattaagatttttatcatgtgtgcacagttatttagaagtataattttttaaaatgaacttttttattatcactttgaaatca…	PREDICTED: AN1-type zinc finger protein 4 isoform X2 [Anas platyrhynchos]	PREDICTED: Notothenia coriiceps zinc finger, AN1-type domain 4 (zfand4), transcript variant X2, mRNA	Uncharacterized protein {ECO:0000313|Ensembl:ENSGALP00000009468} OS=Gallus gallus (Chicken) PE=4 SV=2
TR21736_c0_g1	1085	p2	(AT)6	1038	1049	tgttttgttgctggctcccgtttatcacgtgtagggtaatggatttaaacgcgtctcaacacagggtaaccgaaatgtttttgctaactcttggattcgttaaaagtgctttgtatcccattattttctgtgtacggaacaaaaagttcagagcgacgtgcatacgcttgcttccaacacaggtgaaaatgcccaagacctgtttcgaacacaaacaacgacgtgtgaaccctaaagttttgtatcagtataaagaaagtgaatcaaggatctgacctttatgtgaaggtgtaatatttaATATATATATATgacagaatacttatttataaaaataaaatatcgaaa	PREDICTED: probable G-protein coupled receptor 63 [Xenopus (Silurana) tropicalis]	--	Uncharacterized protein {ECO:0000313|Ensembl:ENSXETP00000002322} (Fragment) OS=Xenopus tropicalis (Western clawed frog) PE=4 SV=1
TR236_c0_g1	1109	p3	(TCA)6	610	627	caacaataacaataaccctacaatataaaatcccaacgtacaaaatcaaaatacaatctagagagacaatcagaaatttaatcctaattgatcgtagtttcgagatgcccagctgcgtccatggtggtttcagccaatgattggggatcctgaacagggcctgccgcctccctttctaaacccttttcactggtacttgcatctcctgaatttactgaatcagtctgcatttgaacaccgtcttgtgagttatcatcattattttcttctattttcacatcttcaccttcattatttcctTCATCATCATCATCATCAtcttcatccattaattgctttgctaatttcactgcttggaattcattgtagtgaagctttcgtttctgttcaaactttctt…	PREDICTED: protein phosphatase inhibitor 2 [Poecilia reticulata]	TPA_asm: Oryzias latipes strain Hd-rR, complete genome assembly, chromosome 4	Uncharacterized protein {ECO:0000313|Ensembl:ENSPFOP00000024550} OS=Poecilia formosa (Amazon molly) PE=4 SV=1
TR20642_c1_g1	1935	p3	(TTG)5	1543	1557	ggctaataaataaaaaaacaacccaaaggagtttgaaatgaaagacaacagagataaaaactggagagagaaaatagaatgtataataaagttatgaaaaatatgacatattgtagattatgattttgctgatttctgttgacttttgtctgttttttaaatctttggcacgaaaaattgatcaataatttatattacacaaatcaaatgatcacaaatgctagcacataaaaatagacttttaagctcttttgagcttcagccatttgtttttggcatatttcaatcatttgtaatattTTGTTGTTGTTGTTGttttcaaataattcaatgttaatttacataaaaagaaaacaataaaattgcgatcccattaatatttttaaataatatctaaat…	#N/A	#N/A	#N/A
TR26827_c0_g1	2056	p3	(AAG)5	1095	1109	cattggaaggggccattactccttcagcagggctacctgatcaccatctgtgcactcatgtctcttgtatttatcaagtatctgccagactggacactctgggttgttctgggagttatggtagtctgggatctggtagctgtgttatgtccaagaggacctctccggatgttggtagagacagcacaagaaagacgggaaccaatatttccagcattgatttattcatcaacaataatgtggcagtctgttatggcagctgactcggaccaacctgaagacaagaagtcagagaagaaaAAGAAGAAGAAGAAGcagcgaacttcagaagagagtgatggtgtgtttgaaaaccctccgacggcaaacacggcagatggcgaagacagcgacgaaggt…	PREDICTED: presenilin-1 isoform X2 [Cariama cristata]	Xenopus (Silurana) tropicalis presenilin 1 (psen1), mRNA >gi|39794486|gb|BC064246.1| Xenopus tropicalis presenilin 1, mRNA (cDNA clone MGC:76240 IMAGE:5336700), complete cds	Presenilin {ECO:0000256|RuleBase:RU361148} OS=Ficedula albicollis (Collared flycatcher) PE=3 SV=1
TR28949_c0_g1	2315	p3	(CAA)8	2253	2276	agtggatcacacagtatgcgtgggttgtcaaggtcagacacaatggagttggaatctgtgacatcaacgcccactccaacaatgaatgcagcagacaatgggtctcggccatatgtgagctcggggaaaggcagaaagaagcttccatgggaaggagagtcaaatggacagaatgatggccctccaaagcagccccgtcagacgtggtcaaacagcgaggatgccaatgatatctacaacaagaaaccgatcatcaagagacgcacacagccagttgttgcacagtcaccaccagaggatCAACAACAACAACAACAACAACAAgaatcttcctacaaacagattcatttgtcaaagttgaga	PREDICTED: protein FAM179B [Callorhinchus milii]	--	Uncharacterized protein {ECO:0000313|Ensembl:ENSLACP00000001387} OS=Latimeria chalumnae (West Indian ocean coelacanth) PE=4 SV=1
TR10523_c1_g1	1330	p3	(CAA)7	498	518	attgtgtgtgtaactataatgtggaattaggtatataccagcaggcaagcacggccgagcaacccatgggatacctctacgagttcgattgcaaacccaagaccgggaaccaaatcggaaacttttatggaataatgtacgaaaaacaggttggttatgttgagataaacgccatggtgcagttgcaaacgtgcccaggagagattcctctggaagataaattaactacaatagctgttcaaacaactacagtaactcctatttcaactatgtcggaaacaacacaaccaattacagtccCAACAACAACAACAACAACAAcacctacaccaccaacaacaaggacaactaggccaactacgcctactacgccgacacaaacaacaacagtgccgacta…	PREDICTED: chitinase-3-like protein 1 [Cynoglossus semilaevis]	Zebrafish DNA sequence from clone DKEY-162H11 in linkage group 7, complete sequence	Uncharacterized protein {ECO:0000313|Ensembl:ENSXETP00000061436} (Fragment) OS=Xenopus tropicalis (Western clawed frog) PE=4 SV=1
TR29292_c6_g1	2784	p3	(GAT)5	2100	2114	aaacgaaggtcaaggtctcgcacaagaaagtcccgatcacgtagtggttccagacacaggtcaagcagaaaggacaagaagaaggaaaaggaacgggaacggagcaaagaaagagaaaggagcaaggagcgtgaacgagatagagaaaagaaaaagaaacacaaagacaaagaacgaggagaaagagaagaaaaaaaagagaacaaagtgaagcgagattacgatgaggaagaacagttctatgaagaggaagaaaagcctgacgataggaagagcagcagcgacaatgatgacatcgaaGATGATGATGATGATgttgataacagaagtagagaaaatggcagcagacatagccgtagtaggagcagaggtagcagcccattgacaataccgacacgc…	PREDICTED: splicing regulatory glutamine/lysine-rich protein 1 isoform X1 [Falco cherrug]	--	Uncharacterized protein {ECO:0000313|Ensembl:ENSFALP00000010259} OS=Ficedula albicollis (Collared flycatcher) PE=4 SV=1
TR31948_c3_g4	1440	c	(AG)44acagagacagagacagagacagacagagagac(AG)6tgcgtgcgtgcgtgcgtgtgtgcgt(GA)9gtgtgtgtgcgtgcgtgcgtgcgtgagagagagagtgagtgagagtgagagagaa(AG)8	1	246	AGAGAGAGAGAGAGAGAGAGAGAGAGAGAGAGAGAGAGAGAGAGAGAGAGAGAGAGAGAGAGAGAGAGAGAGAGAGAGAGAGAGAGAGacagagacagagacagagacagacagagagacAGAGAGAGAGAGtgcgtgcgtgcgtgcgtgtgtgcgtGAGAGAGAGAGAGAGAGAgtgtgtgtgcgtgcgtgcgtgcgtgagagagagagtgagtgagagtgagagagaaAGAGAGAGAGAGAGAGgatgcaaatgaactcaagtcatatttattaaggggatttcaaagtccttgtacttacacttatatagagaaaaaaaattcagcatgatttaaatgtatctgaacagactgaccaaggctacaatatgttcttattagtttgtactgctggtgt…	Putative protein L116 [Columba livia]	Cyprinus carpio genome assembly common carp genome ,scaffold LG30	Uncharacterized protein {ECO:0000313|Ensembl:ENSAPLP00000000341} (Fragment) OS=Anas platyrhynchos (Mallard) PE=4 SV=1
TR16844_c0_g1	3230	p3	(TAG)5	468	482	ggtgctacctcctaacacaaatcatggggaccgataagatgacgatgtcggttatgatcgaggagataatgttgatgataataataataatgatgcttaaagttgaaaatgatcaagatgatatggtgatactgctgctaatgacgacgatgatgttgatattaatgcttataaagttaataattataatagagaacacaatggtgctgccactgctactaatgctgctgctgctaataatgatgataatgacggtcatgacgatgatgataatgacgataatgatgatgacgatgatgaTAGTAGTAGTAGTAGtaagatgatttagacagtatatctgacaattaaggcccaagaccttgattcttggcacaatatcatattaatatagtgtctgtt…	PREDICTED: polypeptide N-acetylgalactosaminyltransferase 13 isoform X1 [Chrysemys picta bellii]	R.esculenta mRNA for calsequestrin	Polypeptide N-acetylgalactosaminyltransferase {ECO:0000256|RuleBase:RU361242} (Fragment) OS=Chelonia mydas (Green sea-turtle) PE=3 SV=1
TR24528_c0_g1	1191	p3	(TGA)8	1146	1169	aaacctaccacggaatcctatcctcgacttcgcgtttggtcattctataattagttgtcatgtggaacaccacttgttccccagactttccgacaatatgtgtttgaagattaaaccagttgtgtcaaagtttttgaaagagaacggattaccgtacaacgaaaagccctatctggaaagacttcggttgttcatcgacaaatatgacactctgatggtaaacgctcccccaattacccattttgttggacttcagtagactttgctttaggtaactcattcttgtttaccatacacttcTGATGATGATGATGATGATGATGAtcatgatgatcatgtgtgaaaa	PREDICTED: fatty acid desaturase 6 [Latimeria chalumnae]	Siniperca chuatsi microsatellite Trans408 sequence	Uncharacterized protein {ECO:0000313|Ensembl:ENSLACP00000012426} OS=Latimeria chalumnae (West Indian ocean coelacanth) PE=4 SV=1
TR9311_c0_g2	4410	p3	(GAT)6	2999	3016	atagaaccagaaattctgaatgaaatgggtcctcttaatgaagtattgccgggcacaatggacacattaattgatactgaatctcccttagatctggctgaagcttctggcacagataatgacgagaccagtccatacgaggaggcagaaatagaagccgtagaagaagagctgcatgaggcagaacctcctgatgaagatcagatggaagattatgatgctccaattgttagagttgatagtcctgatagtgatgaaagtgatgagtcagacaatgatactgagaatgaagatgatcagGATGATGATGATGATGATgacactacaaaagatgaagcttatgatagttcaaagttggaaaataatgttggtggcaatattgaaagtattgataaagat…	PREDICTED: rho guanine nucleotide exchange factor 11 isoform X1 [Meleagris gallopavo]	--	Uncharacterized protein {ECO:0000313|Ensembl:ENSLACP00000002825} (Fragment) OS=Latimeria chalumnae (West Indian ocean coelacanth) PE=4 SV=2
TR38505_c0_g1	3416	p3	(TTG)5	3073	3087	aagtgttaatacgatcattcataaaaagtgaaatttaaaaggtaggcgataaaatatttttattttactgaatgccataattttaatgactttaatttcaatgtttaaataaaaatatttaaagctgaacgttatttttttcattatttactcttttattaaattcttaacatatcaatcaactgaaaacgtttagacttgtatgtatcgactataacattctttaataaggatgcttcaaccaactgtagaacttcatttttagggggattgggggaggggactttggttcttatgttaTTGTTGTTGTTGTTGtttgtgtaattgactagattttgtctctaagcgttataattgtttttgttttaagggaggtcacttgtatcaactcttgtttga…	PREDICTED: protein jagged-2-like isoform X2 [Poecilia formosa]	--	Delta-like protein {ECO:0000256|RuleBase:RU280815} OS=Poecilia formosa (Amazon molly) PE=4 SV=2
TR38797_c0_g1	2465	p3	(AAT)5	2106	2120	tacctgtacgatctgtgtacaacgttcacagagttctatgacaagtgctactgtgtggagaaagatagaaatacaggggagataattaaagtgaacatgagtcgtattctgctgtgtgaggctacagcaagtgtcatcagcaatggattctatattcttggtattacaccagtgtccaagatgtgattaacagatatatgctgtaacacaagtacaaataagcaattgtagtaatacaaggaatgcaacaatatgaagaaataatttttattttggaaacactttataataatgataataAATAATAATAATAATaactttatttgaagaggagacacagttgggacagagcccaatcttcactgtgttcaaatataatatacattgacaatattaaca…	PREDICTED: arginine--tRNA ligase, cytoplasmic [Stegastes partitus]	Salmo salar Arginyl-tRNA synthetase, cytoplasmic (syrc), mRNA >gi|209155883|gb|BT045912.1| Salmo salar clone ssal-rgf-536-207 Arginyl-tRNA synthetase, cytoplasmic putative mRNA, complete cds	Uncharacterized protein {ECO:0000313|Ensembl:ENSLOCP00000015234} OS=Lepisosteus oculatus (Spotted gar) PE=3 SV=1
TR23428_c0_g1	2143	p3	(CTT)5	1997	2011	ctcttctacatcatcgtcagagattccttctgttgattcaacaaccttcatatatttgtcatctcccttctttttgatcgacttgctgtatgtcttcagtgtgttgatgacagcctggggattctcctgctgttcttctttcgagatatctgatccagtcaacaatagctgccatgctggtggaagccccttgaactctccagtgattttatcaaaccccacatggaagttgtgctgtaccatgtaaggagccccgatactcatgtcatctccagtgccgctactggtactcccgtcgggCTTCTTCTTCTTCTTatctttagtggcccctgagtttgccttgaagaggggcatcttgctatttaaagatttactcatggctggtcttcaatcctgggc…	PREDICTED: serine/threonine-protein kinase PAK 1 isoform X4 [Merops nubicus]	Cyprinus carpio genome assembly common carp genome ,scaffold LG4	Serine/threonine-protein kinase PAK 1 {ECO:0000313|EMBL:KFQ53786.1} (Fragment) OS=Nestor notabilis (Kea) PE=4 SV=1
TR7267_c1_g2	1113	p3	(TTG)6	71	88	ttgggttttttttgttgtttttatctaccttaaagtacacataatttattcgaggttaatgggttggtttTTGTTGTTGTTGTTGTTGtttttaacctaccttaaagtacacgtaatttattgtatcctatgaaattaaaatctcccttaacttagatttattccaggctcagcagggaactcctctaataggcaaaaaaaaattcatcttgaactattgccgtataaatgcccagtgaaatggaatcatccaacaattgaccagtttttttttttattattattattttttttagaaggttacatattaagtttgaacaaaaggatgccaatcttatttacaatatggccttcttaacaaaatataataaaataacaataacaaaac	PREDICTED: uncharacterized protein LOC103397171 [Cynoglossus semilaevis]	Cyprinus carpio genome assembly common carp genome ,scaffold LG33	Uncharacterized protein {ECO:0000313|Ensembl:ENSACAP00000021996} (Fragment) OS=Anolis carolinensis (Green anole) PE=4 SV=1
TR56757_c0_g1	2161	c	(TCT)6tcc(TCT)7	28	69	ataccctccagatttaacatttcaataTCTTCTTCTTCTTCTTCTtccTCTTCTTCTTCTTCTTCTTCTtcatcgtcatcagcatcatcatcctcgtcatcattcattttgttggagtctggagtactactgctcgaggcgtgacttccctccgacatgtttgaagaacttcccattgacatgccccctggtttagtgtgagttttcatatgtcgttttaacttgctctgttgggtacaagcgtgtggacaaacagaacatttaaatggcttttcgccagtgtgtgagcgccgatgtacaattaaattgctctggaaccggaaagttttgccacagaattcacaggacttctggttaccagggggtgtg	PREDICTED: B-cell lymphoma/leukemia 11A [Pygoscelis adeliae]	Zebrafish DNA sequence from clone DKEY-13D23 in linkage group 1, complete sequence	Uncharacterized protein {ECO:0000313|Ensembl:ENSPSIP00000015262} OS=Pelodiscus sinensis (Chinese softshell turtle) PE=4 SV=1
TR51441_c1_g1	3755	p2	(AT)6	2530	2541	tttttttcttaatggtaatgtctcagttaaatatgttatataaagattgcttcagagtagtttatgtctgacatttgatatcaatggatgtcaaagatagatttaaaattagtcaatagtagaaattatgtaatttcacattatttgataccagaaaacttaatataaaaataaagacaataagatatgtttgaatatggtggcatgtcaaaatccaaatctaatactttatactagagggaagtatagtattgaatgaaaactcaaatgcagtttatcagaacaaagaaaacgtataagATATATATATATtaaagatcaaatgatctgtctttattatacatattacgtgtaataaaaaagaaagtttgctgaatttatttccactactactgcatt…	toll-like receptor 21, partial [Lissotriton montandoni]	--	Toll-like receptor 21 {ECO:0000313|EMBL:AIZ72105.1} (Fragment) OS=Lissotriton montandoni (Carpathian newt) PE=4 SV=1
TR10715_c2_g1	2117	p2	(TG)6	1536	1547	aaaatgaaataataaaaatagtgcggacaactaaagcaaatgaaatgtaaactggaccgcaaatgtgtcaaatcggagcagttttatgtgaaatcatagtggtaaaaattaacatgttgcaggtatttaaagatggagaacagagagtctgattttggagttgttgtaaaaatgctgcaagcgaattcagtgttgctaatattattgtacctgtacataaaaacaactgaaggtttgcaactgttttagaacaatgtttaaatgtgggaaaatagtgtgtaaatagaactgtacatgaaaTGTGTGTGTGTGaatgtggagaagattttatacattttgtacatttttgaacaatcatgaagtgtcagcagttaacatttgttagggtctacaaatatt…	PREDICTED: serine/threonine-protein phosphatase PP1-alpha catalytic subunit isoform X2 [Zonotrichia albicollis]	PREDICTED: Anas platyrhynchos protein phosphatase 1, catalytic subunit, gamma isozyme (PPP1CC), partial mRNA	Serine/threonine-protein phosphatase {ECO:0000256|RuleBase:RU004273} OS=Takifugu rubripes (Japanese pufferfish) PE=3 SV=1
TR52492_c0_g1	1120	p3	(AAT)5	257	271	agatccagatcagatggcacagatgtgccagctgatctggatctacattctctgcacatgcgtaaaaatgtgtggaggaaagggttaattttatggttatggatgtccaggaaacgaccttcaagcgaaaaaaaattgtggattctatttcaggaaaaaagccaaatgagcttgtctggaacacctttattgagattataatttttaataattttttcctttctacaaccacaaaatcaacaaagccttattatgaAATAATAATAATAATatttcagtaagtatacaaggttatacaccttaatttcattaacttttattggctatatattacaatgtttaatttataaatattaaaatttactttttaatgcagtaatcatttgattttaaattcaa…	#N/A	#N/A	#N/A
TR56922_c0_g1	2535	p3	(CAA)6	1721	1738	ggagcattagcaagccctggacctgtttctggtaaccaagggtcaggtcagggtcccggtccaagccccatgtcaggggcaaacatgcgcctttctcattatgatcctcaacaacaaccacctcaaaatagcagtagcatctcaaattcacctacaacaccgactggtaaatcatctttatcgaacattacgtcggctagtttagcgaacttggcaaaaggtgttgaaaatttatccaatcagatgcagcaacatatgatgcagggcggaccatttcacagtatccagatgcagagccagCAACAACAACAACAACAAcagcagacagcatcatcgggccaagggcatggaactcctcagccttctcagcaggctgtaattaatcagccgcaaaattct…	unnamed protein product [Oncorhynchus mykiss]	--	Oncorhynchus mykiss genomic scaffold, scaffold_500 {ECO:0000313|EMBL:CDQ71511.1} OS=Oncorhynchus mykiss (Rainbow trout) PE=4 SV=1
TR25448_c2_g1	2100	p5	(AACAG)5	2076	2100	aaataacgatcatagaggtaattaaatgataaaacatcattaattcgcttctacatcaggaatttatgtctaaaatataatacatgtatttggatcttaactttgtattatgtgcgtcaaatgttttgcgcatttatgagctcgaagtaggacggaataataaataaaaagagcagagctgggctgaggttaactgagttgagctgtgctgagtttagctgagctgtactgaactgaactgaattgaacttagctgcgctgagctgagctgaacaaaacaaaacaaaacataacaaagaaAACAGAACAGAACAGAACAGAACAG	--	Zebrafish DNA sequence from clone CH211-278K1 in linkage group 13, complete sequence	--
TR41595_c0_g1	1681	p3	(CAT)5	1054	1068	tctggtccccttttcctggcccctgtttcactggagcttgacgagcacaagcactagatttctctctaaccaccttgactgttttttgaccaagtgtttgtgttttaggaatggtttgtgcaggaattttaacagaatctgcctgagattttatcacattctcttccttttgtgttttcttattcccaatagctacatacacaggctggtctcccactttaccaacagtgtatcttacagttcttgcattatcaggtttaccgcttgaaggtcttattacatctttttccatttcaaaacCATCATCATCATCATcagcatcaccataaagctctggctgatatgccttctctggagaagatttctgctgcaagtttttagtcaaaaattcttcactca…	PREDICTED: protein phosphatase 1 regulatory subunit 35-like isoform X1 [Oreochromis niloticus]	--	Uncharacterized protein {ECO:0000313|Ensembl:ENSONIP00000009844} OS=Oreochromis niloticus (Nile tilapia) PE=4 SV=1
TR26333_c0_g1	1925	p2	(AG)16	80	111	gaaatttaacacggatacaaaactgatgttctgaagtcgttaaaagggaaattgactttgataaagccggctaagccatAGAGAGAGAGAGAGAGAGAGAGAGAGAGAGAGttatcacaacagagatgggttcaatacatccacctagaagcggcacggtgaaagtgacacgaatatccccgctcgacaaagctgccaacggttcgcaaacaccgattatggaaatgtctaaaatgaattcctcgccgaacaatggtacattggattcaccaaacaagcaaaatgggaggccgatgaagctgcctccaattgaaaaggaagcaaaaggtccgccacaaggacagtttggaagacagaaaagtattacttcgctggacaaagataaagactcaaatggaa…	PREDICTED: calmodulin [Egretta garzetta]	Cyprinus carpio genome assembly common carp genome ,scaffold 000000441	Uncharacterized protein {ECO:0000313|Ensembl:ENSGACP00000003417} OS=Gasterosteus aculeatus (Three-spined stickleback) PE=4 SV=1
TR54597_c2_g1	4150	p3	(TTG)5	483	497	tatcttagtatttgaaatgaaatacttggaatttgctaatgaaacaacacattaaccttaaacctctttatcatgattaccaacagaatacttgcctcaaaaaactttacttttttaaataacttccacactgttaccagacattaatgaaccaccaacttgattattgaattatatcttagcttaccattttacaattacccagacacaacctctactgtgcaaattatgaattacttaaaaaaagatttcataacaaccaaataatcaaaattttctaatgctgtttttatccgcgttTTGTTGTTGTTGTTGtttttaataaaatagttccaaattgttcaccgtaaagaaacactactgttacatttgtacacaacattcgtggaaccagttaaa…	retinoblastoma-associated protein [Gallus gallus]	PREDICTED: Python bivittatus retinoblastoma 1 (RB1), mRNA	Retinoblastoma-associated protein {ECO:0000313|EMBL:KFV83253.1} (Fragment) OS=Struthio camelus australis PE=4 SV=1
TR23905_c1_g1	1454	p4	(TCCG)11	1332	1375	aacattatgtaagtgattgatttgaaagtaataattcactttcatcattgatttgttaatattctgtttgcacatgaatgtttggccaaagttcttgtactttttatcgttaactttaataactactatcttaaaagatattaaatcaataattattttcaaaattgcagttgtttcaaatgaattgaatagatgagcaagctgtcacctgtgacagctcttgtttattggtgtttatgaactgtctgtaatgtatttttatgcccccggcatctagtgattgaaccgtccgtccgtcttTCCGTCCGTCCGTCCGTCCGTCCGTCCGTCCGTCCGTCCGTCCGgttaacatttttcggcaagttggatatttctcaatttctacaaagagcattggca…	--	Zebrafish DNA sequence from clone CH73-52D20 in linkage group 16, complete sequence	--
TR40323_c0_g1	2278	p3	(GTT)5	2183	2197	gacaccagtctggccacaaacatccttaacagtgaaaatcacagctaaccagatgtcttctgaggattgttggtagaagttaggctgggggttccagatctgaatctccttagttgatgtagccagcaccttaccatcctgctgcaccagggctgcccgcacagatcctgtccctacatcaactccaatgaaatatttcatgcctctatcttaaactgtagtctcaataaatttactgcaagaacagttccaaaagcctttgttgagagcagacttgagactccacctacaacacaatgcGTTGTTGTTGTTGTTcaatgaaagggacagaactaaccgtagtttcactttcggtttacacacaagtctcaggtgattggattcagtggcttatag	FGGY carbohydrate kinase domain-containing protein [Xenopus laevis]	--	Uncharacterized protein {ECO:0000313|Ensembl:ENSLACP00000009001} OS=Latimeria chalumnae (West Indian ocean coelacanth) PE=4 SV=1
TR54014_c0_g1	1371	p3	(AGA)7	299	319	aaggaatgtcagatgatgaatttgaagatttcccagcctatcacacaagacaacaagacccgacccttgtgaggagagcttttacaccaataacagacagaatgaaggcaagaaatgcaggtagtggtgataacaccagccagcaaccgaagagggcctcgccacgatctccaaaaggtgccaaaaagaaccagcctgcaaattcacgtagtccaaagagcatgaataaaacccaaaaaaagaaaaagaatgaactgtatccagatttaccgagtgctgatgatggtgagaattcagtAGAAGAAGAAGAAGAAGAAGAtgataattataatgcagtagatggggaagacattgccaacttggaaaatgacataacgggagatcattctcctctaagga…	PREDICTED: torsin-1A-interacting protein 2-like [Pundamilia nyererei]	--	Uncharacterized protein {ECO:0000313|Ensembl:ENSPFOP00000022005} OS=Poecilia formosa (Amazon molly) PE=4 SV=1
TR8928_c0_g1	2036	p2	(AT)6	1757	1768	ttggtttacatcttggaagaaaaaatgctgtgcgccttcatcgtggtattgaataatagcttcatacagatataattattgtgttcaaagtgagtatctaaaaatcccaacttctgtgtataggctgttttcttcacggaaaaaaatataagtgctttgttctccattattcaagcttttcagaagcggcagcttaaaaagcaagttactctattgctcagtctctgaaaagatatgctgttaatcttttctgctgatgatgatgaatattggaatctttgtgtacagatattcatacaaATATATATATATgttattgttcacatcagatatatacataacgctacgtaacgatctctgccaaattagtggataattggtgcagggtactattttttt…	PREDICTED: protein FAM46A [Callorhinchus milii]	--	Uncharacterized protein {ECO:0000313|Ensembl:ENSLACP00000011446} OS=Latimeria chalumnae (West Indian ocean coelacanth) PE=4 SV=1
TR9747_c0_g1	3251	p3	(TGC)8	2291	2314	tcaagcagggaaagatgaaagaagttcctgcaggaaaattgcatgacgcatactgtaaagtgtgcaagaatcgtcagatggcccctgttgaccagtccgaataccagggtattctcacactgctcgagtcgcgcgggatgattggcatcaagaaggcgaaggaaaccagaatgaataaggtaactttgaaacttgatgagaaggagctagaacacacaatgcaggacaaggtgctgatatctaccatactgaaggaaggccttccgaaatgagggatagctttgctcattgtaaattctgTGCTGCTGCTGCTGCTGCTGCTGCttatcgcacattcagtgctggaaaacacattgctcaaacttataacatatctgaactacaaaaaaaagaattcac…	Cdc6-related protein [Xenopus laevis]	PREDICTED: Haplochromis burtoni inactive dual specificity phosphatase 27-like (LOC102298855), mRNA	Cdc6-related protein {ECO:0000313|EMBL:AAO73965.1} OS=Xenopus laevis (African clawed frog) PE=2 SV=1
TR23249_c0_g1	2688	c	(A)10cagatttcggaataaaaatgggattttatactggacacaccaatatttgacttgaagttacactgtctacttgctgttcag(GA)10	2300	2410	ccggagccccaagacaaagaagcattcattttgaacgggatgtactcaacagcttatgagtcatttgagcccgaagtctgggattggccagaataaatgtcaatattacgactttttaggacttttagatcacacaaatacaatatttgtatattttttttgaaaattaaatacatttgactgcacttctagaaaaatatttgatacaaatttacttgctttttcacgtgttgatatataattttataaatgtaaaactggtaaggtacatgtattaaagtggtgctgatatttttactgAAAAAAAAAAcagatttcggaataaaaatgggattttatactggacacaccaatatttgacttgaagttacactgtctacttgctgttcagGAGAGAGA…	PREDICTED: NADP-dependent malic enzyme, mitochondrial [Cynoglossus semilaevis]	PREDICTED: Buceros rhinoceros silvestris malic enzyme 3, NADP(+)-dependent, mitochondrial (ME3), mRNA	Malic enzyme {ECO:0000256|RuleBase:RU003426} OS=Poecilia formosa (Amazon molly) PE=3 SV=1
TR35344_c2_g2	3383	p2	(AT)10	69	88	gtcaaagaagagatatcacctttttgaaacagaagcctgtgtcatttattatggtataaagaacatgcATATATATATATATATATATtcagtctacgggctccatttattgtccactgatgaaaggtgtatccacgtagtaacgggttaacaacaccataaaaaatctccactgaactcaatcttcaagtctgcttcgctttctaatgattttgctcatgttgaattctcggtgatccagcataaatgccccattgtacacacaaagaactgtcatattgttgctgtattctaaatctggcagtaattttggtgtgagcagaaagtattgggaggtagctttcttacagactgtgtttactaccagctcaaacaccttgcgttcatt	PREDICTED: structural maintenance of chromosomes protein 5 [Latimeria chalumnae]	Gallus gallus structural maintenance of chromosomes 5 (SMC5), mRNA	Uncharacterized protein {ECO:0000313|Ensembl:ENSLACP00000002851} OS=Latimeria chalumnae (West Indian ocean coelacanth) PE=4 SV=1
TR40258_c0_g1	3903	p3	(GGA)5	2971	2985	gaaggtggccatggtgaactctatccccatgcaagtccttgaaaatgtgaaagaatggctgaactcatgtgacttgcgttacacggagggcgtgcagtctctgaactggaccaagattatgaagaccatcacggatgatccggagggcttctttgacaacggtggctggagcttcctcgacccagagagtgaggatgaagaggaagacgaagaagatgaagaagacgaggaatttaacccgtctgatgagttcagcggtagcgaggagagttccgaggactacagtgaggagagtgactgGGAGGAGGAGGAGGAagatgatgactcagatgaggaggaggaccttggttcgagcgaggagagcggcaaggactgggacgagctggaggaggaagccag…	PREDICTED: FACT complex subunit SPT16 [Python bivittatus]	PREDICTED: Cynoglossus semilaevis suppressor of Ty 16 homolog (S. cerevisiae) (supt16h), transcript variant X2, mRNA	FACT complex subunit SPT16-like {ECO:0000313|EMBL:JAG66421.1} OS=Boiga irregularis (Brown tree snake) PE=4 SV=1
TR23224_c0_g1	3948	c	(AT)6aaatatctcctagtgctgtgtcattc(AT)6	3261	3310	cgactctgactcactctattataagcagcagctgaagcaggctagagaagaaatactgcaactgaagaagaaatgtgacgactgtgatcgagaaataacccgtctgaaaggcgagctcaaacgagtctcctcagactatggcagagtcgctggaaggagcaaactgatatcatttgtgtcgtgtatacctctgctgatgttactgtttgccatactgttggccatgtatccatatctggaaagactgacggcaacagggacttaatgatcaccccatcataggcgtcaatatatctatcaATATATATATATaaatatctcctagtgctgtgtcattcATATATATATATaactccagtcttgtactatgttaaaatgctgaaatttcagtccggacat…	PREDICTED: sarcolemmal membrane-associated protein isoform X16 [Anas platyrhynchos]	--	Sarcolemmal membrane-associated protein {ECO:0000313|EMBL:EOA96395.1} (Fragment) OS=Anas platyrhynchos (Mallard) PE=4 SV=1
TR23493_c0_g1	1625	p2	(TA)8	1137	1152	gtctgatcatgcattggccgacactccaagtcacttgataccacaaagaaagtatgtggatattgtcatggagattttgagctcattcagaactcggtaccgacaagtccaaaatctgccgcaagctctacatctgccacaccgtgatcagcaaacaagtttgccatgtttgttaaagacaattataattcagtgaagagtaaaaataaagagttgaaacatggggaagttatgtaggagctgagtaaactgtttgctgagaataaaatctcatctacatagagaaatagactagatttgTATATATATATATATAaatttacattgatagacaaatacaaagataagatgtgagagacgatcagagttttgcctaagaagaagttctaaactacatag…	PREDICTED: acidic repeat-containing protein isoform X1 [Anolis carolinensis]	--	Uncharacterized protein {ECO:0000313|Ensembl:ENSACAP00000007003} OS=Anolis carolinensis (Green anole) PE=4 SV=2
TR51786_c3_g10	1738	p3	(AAC)5	1205	1219	ggtcaactgaagccgcttcatttattcttgaagaactttttttcaataaggctgctttgttattttggacaatcgttgaataagtaactgtctaatttactatccatgatttaaatttagcaatcatgtataaattaataggaaattgataatattgatatttgagggatgtaatgtttgttagtttacacttttccaagctgctttttgtgtggcttttggcgatttggtgatagtgaatatggacagacattagaagttaaatatataagcggagtatcacctacgtataatttagaaAACAACAACAACAACagtgcccgctggtaattaaaaatcagttaaacgctaatcacacctttaatagagtgaagaaaaacctttcataacagcaagcta…	#N/A	#N/A	#N/A
TR11260_c1_g1	2862	p3	(ATG)7	1043	1063	taactaacaaatacagtttctcatttaaacacttgatgactcgtgattctttcagtttcatattgatgacataatctgggtgttatcaagtattgccgactgtacctgctctaatcaatccacaattagggtgctgttcccttcaagtcaatgattgtgactgctaactcggtgccagctgtctaccattaatgttataaaggggagtaactcattatcaggacttgttaactccccttcattcagtgctgtaagcacagaatattattgtgaaagcaatgtgcatccctcgtttccttcATGATGATGATGATGATGATGgtggctgctgtctgggctgagctagcttggccagggtctcggggctggcggctgcccgtaaaatgccgttctcgtact…	PREDICTED: TSC22 domain family protein 1-like isoform X2 [Astyanax mexicanus]	PREDICTED: Larimichthys crocea TSC22 domain family protein 1-like (LOC104936518), transcript variant X2, mRNA	Uncharacterized protein {ECO:0000313|Ensembl:ENSDARP00000061314} OS=Danio rerio (Zebrafish) PE=2 SV=1
TR1400_c0_g2	1490	p2	(TG)16	17	48	gactgtttcctaaagaTGTGTGTGTGTGTGTGTGTGTGTGTGTGTGTGcgtgcttcggcagatggctgtgctttgcgatgccttctagcacctcctgcaactaaactggcaccggccttatcggcttgcctttccaccggactctttcaaacgccgaaaggaggatccttgcactgggcactaggatctccataccactcgccaaggcctgcaactggagaggtccataacactcgtccagtcctgcaactggccactccagctccgctgtctcagcgcagactcaacacggggagcagcagtcattagtgataagccttgactcattttgcgtagagctgggcgcta	PREDICTED: olfactory receptor 52E4-like [Pelodiscus sinensis]	TPA_asm: Oryzias latipes strain Hd-rR, complete genome assembly, chromosome 15	Uncharacterized protein {ECO:0000313|Ensembl:ENSPSIP00000001541} OS=Pelodiscus sinensis (Chinese softshell turtle) PE=4 SV=1
TR40113_c0_g1	1050	p3	(CAG)8	1012	1035	gaagtcaaggtcatggtaaacgctacccgccttaagccttactatgaccctgaaagcagacctaccaacccacctgcaggttatgaacatctccaagagcccttgaatgctgaagagatgccgagtgaacagcaaccacagcctgaaccacagcttcagcagtcacagccacaaagttcaaaggataaagggaagaaacccaagaaaggccctcaaaaggtaaagaaatctctgccagagaccccacaaccaaacactacttcaaactctaacccttctcttagtaatcctcaaccatctCAGCAGCAGCAGCAGCAGCAGCAGcgaagaccagaagct	PREDICTED: DNA replication complex GINS protein PSF2 [Oryzias latipes]	PREDICTED: Poecilia reticulata zinc finger protein ZIC 4-like (LOC103456543), transcript variant X3, mRNA	Uncharacterized protein {ECO:0000313|Ensembl:ENSLACP00000000102} (Fragment) OS=Latimeria chalumnae (West Indian ocean coelacanth) PE=4 SV=1
TR48245_c0_g1	1224	p2	(TA)6	478	489	catttagcccaagaaatgatgaaaagaaaagggacttgaactaatgatcaaatttttatttaaaaatgataaactgattttgataattgtctacatttgaaaataattttttatgatgcgcgtgcttgcttgtttattttgaccttatttatgtaaagtgttcttatctattgtaaaatgattaataaccgcattttcatattgcattcaatatttgtcgttgtgacggagtgcgtattacaaattacatgtagttaatggaaatgtgtttattaattgtttgtgttatgatcagtacttTATATATATATAttcataagtgtttaaatgcatatgtgaagcgccaggaaaaaaggtacttaacagttaactaagtactttaatttcttggtatacaat…	#N/A	#N/A	#N/A
TR40354_c2_g1	3668	p3	(CCA)5	2693	2707	tggttgcgggatcaattttcagagtttacatggtcaaatcgccacgatgtttgtatctgttatgccgagctccactgtaaaatccaaggattcctccttaatcggcatagtattcaatcgctctagtccttgttgggacagtctcgtgccaagtgtccctcttcatcacactcgtagcatttgcctggtcctctgccaccgccaccaccactttttctgccttgtgtgcaatcacgcgaaatatgtccagattctccgcaattgtaacattccctgtcatcacctccaccacctctgcgtCCACCACCACCACCAcctcctccgcctcccctacgttcacttgggcactccctagcaatgtggccacgttctccacagttgtagcactctgagccgcca…	serine/arginine-rich splicing factor 1 [Xenopus (Silurana) tropicalis]	PREDICTED: Cynoglossus semilaevis serine/arginine-rich splicing factor 1 (LOC103395123), transcript variant X2, misc_RNA	Sfrs1 protein {ECO:0000313|EMBL:AAH42354.1} (Fragment) OS=Xenopus laevis (African clawed frog) PE=2 SV=1
TR40354_c2_g1	3668	p3	(CCA)5	2900	2914	ccactttttctgccttgtgtgcaatcacgcgaaatatgtccagattctccgcaattgtaacattccctgtcatcacctccaccacctctgcgtccaccaccaccaccacctcctccgcctcccctacgttcacttgggcactccctagcaatgtggccacgttctccacagttgtagcactctgagccgccaccaccacctcgaccaccgccaccaccacctcggcctccacgactatcactcttgcttggacattctcgagcaaaatgaccagtctcgttgcagttgtagcaaacactgCCACCACCACCACCAccgccgccgccaccaccaccagacccggagtcttcttttactctgatgtatgaggtctctccctcgtgtgacctgaatttagaa…	serine/arginine-rich splicing factor 1 [Xenopus (Silurana) tropicalis]	PREDICTED: Cynoglossus semilaevis serine/arginine-rich splicing factor 1 (LOC103395123), transcript variant X2, misc_RNA	Sfrs1 protein {ECO:0000313|EMBL:AAH42354.1} (Fragment) OS=Xenopus laevis (African clawed frog) PE=2 SV=1
TR28038_c1_g1	2656	p3	(TGT)5	2186	2200	agacagtgatgcaagggcccagtgctagaatcacccgcagtttgggttgtatggtctcaattgctagaacagaccaagatatcaacactggaagttggccaagtacgctgataatgcagctgatgccgcagactttactgaattccagccagttacatcccttgttcaagaacagtcgccaggtggcgtttcattttcacaacactaatctggacgacctgcggaatttgtataaagtgatgggcagtggatttgctggatgtgttcacttcccgccaagcacagcatgtgacatccgtgTGTTGTTGTTGTTGTtcagtaacaagaggaagtcattcgttggcctcatacccaacgaccagagtggtgtggtgaacggtatacgtcaggttatcactc…	PREDICTED: mediator of RNA polymerase II transcription subunit 25 isoform X5 [Python bivittatus]	Lethenteron camtschaticum clone BAC 238J5 homeobox protein Hox-delta3 (Hox-delta3) and homeobox protein Hox-delta2 (Hox-delta2) genes, complete cds, complete sequence	Uncharacterized protein {ECO:0000313|Ensembl:ENSACAP00000020080} OS=Anolis carolinensis (Green anole) PE=4 SV=1
TR21788_c0_g1	1106	p3	(TGT)5	1070	1084	cagaatcctttgctagacgctaagggatctacacctactgctgcacacatttcctggaactgggctctgaactctggattctttcttatatcatccttgtgtttccctgtgaactcctccaagtgacctttaaaattctccatctgctttgacatctgagcaaactggtcttcggcaatctcatttcctttgtctttgtatttagcctgtgctaaattcttgttcgctattgcaccaattccggctcttcgtctcattgtttaattaaaacgagaaaatgcagaaaatgcgtttctcgaaTGTTGTTGTTGTTGTtttaaatcacaaaagacttggg	PREDICTED: vacuolar-sorting protein SNF8 [Cynoglossus semilaevis]	PREDICTED: Tinamus guttatus SNF8, ESCRT-II complex subunit (SNF8), mRNA	Uncharacterized protein {ECO:0000313|Ensembl:ENSONIP00000022926} OS=Oreochromis niloticus (Nile tilapia) PE=4 SV=1
TR50566_c0_g1	1552	p3	(TGA)8	1529	1552	tgaagatgtagatgatgacaatgagctttttggatcccataaacaactccatgctcccagcattgctactatacccaggcatgaaaatcagacacgtaattctaaaactagtcttagcaacgaacatttaagcatagcaactggactttttgatgttgatgatcaggaagagtgtttatttggttcaaggccaaaagctttggctgacatttctttacccaaaactgaaagtcaaacatctaaagatagctatagcaatgcaaagaaacagatagtctcggccctctttgcagacaacagTGATGATGATGATGATGATGATGA	PREDICTED: WASH complex subunit FAM21C [Chaetura pelagica]	Cyprinus carpio genome assembly common carp genome ,scaffold LG5	WASH complex subunit FAM21A {ECO:0000313|EMBL:KFV57924.1} (Fragment) OS=Gavia stellata (Red-throated diver) PE=4 SV=1
TR55416_c0_g1	2772	p4	(CCGT)5	2743	2762	ttgatgattagaccgccattctaatattaaattttcagctttgcacaatttttacacatcaaaaataccacaccactgcaaagaccacttttacccagtcccagggttggtcttaatagtgtggtttcactgtaaccaagaacagtttttccattaatacatacttgttgaaaatacctttcatttgatctaaaccacaaggcagtgttcctttaaaaggttttaatacattattcttttgttattttatttgatggaatacatttttatgcccccgaagggaggcatatagtaatcggaCCGTCCGTCCGTCCGTCCGTccgaaataat	--	--	--
TR25994_c0_g1	1255	p3	(TTG)7	552	572	tgaaatgcttcagtgcgtgtcctacacgttgctttccgatatatcaatgctatggtcaagtaaagcgccgggcgcgcttttagctgttctgactgtcgctcggctagtccccgtggtcggccggctggacgtcggtgtctgagcctcgtgacaaaacaccggttggaggtattcgaagtgctcggttgacaaaatatccggggtcagagtctctttcattttaatttctattggcgtagagtttctagaatctgtacttctttctggtaacgaagtctcgctgtccggagctttctgagtTTGTTGTTGTTGTTGTTGTTGactgctcggttctttccggtctatctttcgccgctttcgtcgaagtctcgagacttaagtagtggtagtggtcgattc…	#N/A	#N/A	#N/A
TR29310_c2_g1	1911	p2	(TG)6	1078	1089	attgtttttagtgattacaaggatgtttaacccatctttagagatgtgaccagtgtagattcagatcagcctgcacatctgtaccatctgatctggatctatagtggttgcttccatttctgttttgtaaatgtataatgtttttcatctgcaaatggaatctccctattttgtatttcttgccagtgtagatgtatgtgacagtattatcatgactcactttgtgtgtgtgtagtttgtgtgtgtgtagtttgtgaaattttgctttttttatactcgtgtaaaacttttaaatggtatTGTGTGTGTGTGaacttatactatttcaacaaagaaaacaattattgctaacattgaaacctaagttctccatcaggagttgctaaataaatcaaggat…	#N/A	#N/A	#N/A
TR13116_c0_g2	2355	p3	(CAA)5	701	715	ttatgccgaaccagaactccaggttagacgtttatacggtggagaccggaagtaaccgaagtacgctggtttatgagcacgtgtatcaacctacgtcacagtggcaggaagtgaaagttttgctaaatacaagcaatgcttttaggattgagtttagatcggctaaagaaaacaactttgggtacgttgggatagatcatgttcaaatcctaatagagaagatctttacaacaactcctgcaacatttttaaccacaacaacaacgtttcgtccaatcacaaccccttctacaaccgtgcCAACAACAACAACAActgaacttacaaccgaacttacaacaacaacaataacaacaacagggtctacaactacaatgtcaacaacgccaatgacaacca…	PREDICTED: integumentary mucin C.1-like [Esox lucius]	--	Uncharacterized protein {ECO:0000313|Ensembl:ENSAMXP00000003966} OS=Astyanax mexicanus (Blind cave fish) PE=4 SV=1
TR25507_c50_g21	1520	p3	(TGA)5	628	642	tgcaatggattaaatcagtattatatagcaaatttacatcaacaatttacgacagactaaatagaaattccaataaactccaaaattgtacaactgacatcatacagatttacagtagattgtacaaatacacatcactactctgtaacacccagatttgttacctctttaatcaatcatcaagtttataattgttagtgttttgtaatttttgttcaatttttaagaaattgcttttgttaccatggttacccattctccagaactcttcaaaaagtttctgtcagtataatgattgatTGATGATGATGATGAcgatgatgcaataatcaaagtaacaaatatcactcaatacactgacaaaaactttgtgaacacagcatgcctttttacacacct…	PREDICTED: ADP-ribosylation factor 1-like [Cynoglossus semilaevis]	PREDICTED: Poecilia reticulata ADP-ribosylation factor 1-like (LOC103468656), mRNA	Uncharacterized protein {ECO:0000313|Ensembl:ENSXMAP00000009214} OS=Xiphophorus maculatus (Southern platyfish) PE=3 SV=1
TR51463_c0_g1	2366	p2	(AT)8	1046	1061	caactaatggaatggataaaattcaaaggaaggaaagtctatttaacaaatgaaacagatcaagtgttgaatgtgcactgagcattacacagacctctggaaaaaaagaaactgatgttcatccatttaaatgtcatcaatagcaacaaggtaaaaatttgtaaaacattcaggtcaatttgttcgaacgtgatcctacctctatgtaatatttggcagcctacacttcagtgatactctttgatgatctactaaaacctgaggtccatgataaaggatggcatcaattaagttctctgaATATATATATATATATtacatttatacatgtatcctatatgcacaattcattactagcaagtcagtagaatttacagacacttgtatatcacagctaga…	protein kinase, AMP-activated, beta 2 non-catalytic subunit [Xenopus laevis]	Osmerus mordax clone omor-eva-511-332 5-AMP-activated protein kinase subunit beta-1 putative mRNA, complete cds	Prkab2-prov protein {ECO:0000313|EMBL:AAH53787.1} OS=Xenopus laevis (African clawed frog) PE=2 SV=1
TR31362_c0_g1	1456	p3	(TGT)6	1392	1409	tggagccggtgtagttgtagaggttggagccggtgtagttgtagaggttgaagccggtgtagttgtagaggttgtagccggtgtagttgtagaggttgtagccggtgttgtagagattggagccggtgtagttgtagaggttggagccggtgtagttgtagaggttgaagccggtgtagttgtagaggttgtagccggtgtagttgtagaggttgtagccggtgtagttgtagagattggagccgatggagttgtagagattggggtcaatgttttttttggtgttgaaggcgaagggacTGTTGTTGTTGTTGTTGTtgatgatgatgataatgttgtagctggtttggttgcttgcattgcgg	PREDICTED: flocculation protein FLO11-like [Poecilia formosa]	Zebrafish DNA sequence from clone CH1073-209I11 in linkage group 15, complete sequence	Uncharacterized protein {ECO:0000313|Ensembl:ENSONIP00000010368} (Fragment) OS=Oreochromis niloticus (Nile tilapia) PE=4 SV=1
TR9316_c0_g1	3840	p3	(TGT)5	1135	1149	cactgttgtatgacccgctgtaggtatttgacctaccaccactgttgtaagaacctccataggaactgccattaccagaactatagccagttgctgcaccctggttgtatctaccatacccctcggactgggcctgcatgtttctgttgtacgaattcatctgtcctacttgatctctctgcagatagttcatcatgggccgtatatgaggcaatgccggtggcatccaaccccctccttgttgtctgcctccatacccaccgccgccaccactgttgtatcctcctctaccaccacctcTGTTGTTGTTGTTGTatccctggttatagctttgaccatatgatggcggtggtatgctgactccactcctgatcattctgttagctggtcccatatcct…	PREDICTED: 5&apos;-3&apos; exoribonuclease 2-like [Neolamprologus brichardi]	PREDICTED: Takifugu rubripes 5'-3' exoribonuclease 2 (xrn2), transcript variant X2, mRNA	Uncharacterized protein {ECO:0000313|Ensembl:ENSONIP00000023567} OS=Oreochromis niloticus (Nile tilapia) PE=4 SV=1
TR28782_c0_g1	3607	p3	(TTG)5	2842	2856	cgtcacgaacgccgggatgtcatgtgttgacaatgtgtatctatattccatattttctgtgaaatccattggcctttctctggcccctaatttactgagagtcataggtcgaattacaacaggactcctctcgccagggtaggatggttcctctacacgctgcaaaagagatggcgcagcagtgttacaagccgtctggttcccggtatgattggcgttcaactgtttttgtaacgactgctgttgctgtcgcagtttgagtgtctgcagtagcttgagttgcttctgaatgagaagattTTGTTGTTGTTGTTGtctcaatgcttgttgtgggctaaaaacctcttgttgcgctatctgggatggggaacaagcctgctgcaaagcttgcaaagtgga…	PREDICTED: CREB3 regulatory factor isoform X2 [Callorhinchus milii]	--	Uncharacterized protein {ECO:0000313|Ensembl:ENSORLP00000002966} (Fragment) OS=Oryzias latipes (Medaka fish) PE=4 SV=1
TR9713_c9_g2	1164	c	(T)11aatttttatccaggatgttg(T)10cacaggaaaatttcagtgaactttattttttatcaggtttgtgttttcttttgactgcttctgcttttcatgtgttttct(A)10	24	154	cattattttatggaaaaataataTTTTTTTTTTTaatttttatccaggatgttgTTTTTTTTTTcacaggaaaatttcagtgaactttattttttatcaggtttgtgttttcttttgactgcttctgcttttcatgtgttttctAAAAAAAAAAcaaaaaaaaactgagtgtgtgctgtgaatatgctcttcatgatctcttaaaaaaattgtcagcctttttcagcgcatgaaggaagatttctaaataatggcagtaatttgaagccagggctgctatataattactagtcagtggcgtagctactattgcacctcagatatccttatcaaatggcaactgtcactagaaacccgttatataggaatctcttatatgtgcctacaacttgtaaaaag…	--	Danio rerio mRNA for transcription factor c-Maf, complete cds	--
TR21654_c0_g1	1303	p2	(AT)7	331	344	atttccccccaacataactgaaaacaaagtctgaccagtataccaggaaacttctagtgtttgttctaaacatactagataaactagatgaagttatttaaaataaatgtaagccagtactgtgccaaaaggaaaactgcctaacttgcattagtatgttaacacttcaaacaatacattagttgactaacaaatctgtcaattttcaaggatttggctcttttatgtcaaacttcaacactatatatctaataacttcatttcattggattgttattcttaattttaaccctttactacATATATATATATATgccctttatcatagagtgcagatcctgatcagatggcatggatgtgctggcagagctggatctacactgcaataaacgtgtatct…	#N/A	#N/A	#N/A
TR40997_c1_g1	1016	p3	(TGT)5	974	988	gcatatctgtcttggttccatccagtcctcccgtatcaaagattcgaactttctctttcactcccctgtctgtttcaatcatagctgtgtaaatatcttctatagttggatgcattggtgttcctattttatggttatcatacatcagatgttctatgattgctgatttaccaactccagtatgaccacacaccaagattttgctgatctttcccattcttcttacaagagtatcaaaatactcttgtcttaagtgctctttttaaaattattggaaagttgaatgatatttggtgttggTGTTGTTGTTGTTGTtgctctatcggtcccgcccgtatcaaag	PREDICTED: NF-kappa-B inhibitor-interacting Ras-like protein 1 isoform X2 [Poecilia reticulata]	--	Uncharacterized protein {ECO:0000313|Ensembl:ENSGACP00000010534} OS=Gasterosteus aculeatus (Three-spined stickleback) PE=4 SV=1
TR25836_c0_g1	1147	p3	(TTG)5	379	393	gcagaaaaatggaggaaagggttagttagtgctttggtctagtctgtatagttgtatgtttctaaaaatatttggcttaatagttattatcgttgtcaagtgtcggctgtgagttgtatgtgatagcattactataatattataactatattattatcagtcaccactcttataaagtgttcagttaccagcctagttctgttttaaattttaatgaaaatcatggtggaagaaggaaagtaacaacatgaaggctggtttgatatattttaaacagtgtttgttctcttgttcctgttaTTGTTGTTGTTGTTGtttaataagcacacctggggtctcaaggtgtgagttttgggctttcaaacattctcactactgctaagggatacagttggaaac…	PREDICTED: uncharacterized protein LOC105030512 [Esox lucius]	--	Oncorhynchus mykiss genomic scaffold, scaffold_21003 {ECO:0000313|EMBL:CDQ96345.1} OS=Oncorhynchus mykiss (Rainbow trout) PE=4 SV=1
TR37491_c0_g1	1467	p2	(AC)7	150	163	attggcaagcccagtttcagtgatttcaaaaaacaatttaattcttgctttttcataaatgatgcatacacattaacactatataacttttaactgcatgagaatgttttcaacgcacaagacatgtgccacaacatgggtcattctggACACACACACACACggtatttctgatcttaacaaagtgctaaatttaatgggatgaaaattttttcaagtctgtcatttttcattgaatacttttaatagagttgattttgttcttactcccaatgtgcaggctgatctggatgttcacagatgattcatggagtcaaagagttaccacaacaaccacatcacactggaagtgttcataactggtataaatattgtcacagacaatatgattaaagcatc…	PREDICTED: enoyl-CoA hydratase, mitochondrial [Poecilia formosa]	Ictalurus punctatus mitochondrial enoyl-CoA hydratase (echm), mRNA >gi|308324680|gb|GU589525.1| Ictalurus punctatus clone CBPN7772 mitochondrial enoyl-CoA hydratase (ECHM) mRNA, complete cds; nuclear gene for mitochondrial product	Uncharacterized protein {ECO:0000313|Ensembl:ENSPFOP00000007092} OS=Poecilia formosa (Amazon molly) PE=3 SV=2
TR25905_c0_g1	3322	p3	(GTT)8	3064	3087	ggaaatttggaatgtaatgatttcttaaataaagaagatttagcgtcgataattgtcaacatcaatcacttatctatttatgtaaccccgccgtaaaatcataagcgaatctcctgcaatacataaattcacttgttcagcctcaaccataaaaaaatgaaatcactcgttaagccttcgccctgcactgtactgtacatttattcagttatattcaaaattcgaattttgtagtttagtattaaaatatttgacacgctgtagtcaatccgtcacatttttaaatccccgttataaaccGTTGTTGTTGTTGTTGTTGTTGTTcatcagcgttgaacactttaattagtttcgtatttggtcactttccaaatttaacacaaaactattcaccaccag…	--	Cyprinus carpio genome assembly common carp genome ,scaffold 000002625	--
TR26233_c0_g1	2122	p3	(CAT)21	2058	2120	taaatagtgcgaggaaaaaggaaaaaaaagtcaaaagaaatatacatgaacggatagaacggatagccaggtcaaaatcgaacatgctgtcatccctttattagcatgtcgttgtgtgaaaaagtaaagtgcggggtgttcttaataacgtgttgaaagaatgagggtgatttctcctgaaaaaaagtgagaatagttgtgaccagatttggaaaaaatcaagaattttccagattcaggcgacaatctgaaactttattctagtctacacatcgtcgtcgtcatcaccatcaccaccacCATCATCATCATCATCATCATCATCATCATCATCATCATCATCATCATCATCATCATCATCATca	unnamed protein product, partial [Tetraodon nigroviridis]	Takifugu rubripes clone 208D11, complete sequence	Chromosome undetermined SCAF5157, whole genome shotgun sequence {ECO:0000313|EMBL:CAF88611.1} (Fragment) OS=Tetraodon nigroviridis (Spotted green pufferfish) PE=4 SV=1
TR50771_c2_g2	5263	p3	(CAA)5	4266	4280	ccgcagaatcagtatccaagcccagccagcactcagggtggtgttgggcagcagaatgtgccctccagtcagtacctaggcccagccagcactcagggtgttggtggtcagtttggaccaggaacttctggttcagctatgacctcaacaacccagccacagtggatgcccacaacatcaaactatggacagccacatcaccaactgccccaacaacaacaacagcaatttcagccacaacaacatcaaatgccgcagactaatcagactcatgctttgcctcaacaacagcagcaacagCAACAACAACAACAAttccctccacagcagcacatgcagcagagtaatcagcagtggtctgggcagcatcagcaacaaccatttgttagccagcctgca…	PREDICTED: tyrosine-protein phosphatase non-receptor type 23 isoform X1 [Danio rerio]	Zebrafish DNA sequence from clone CH211-12B16 in linkage group 16, complete sequence	Protein-tyrosine-phosphatase {ECO:0000256|SAAS:SAAS00140653} OS=Danio rerio (Zebrafish) PE=4 SV=1
TR55709_c0_g1	1977	p4	(AGAA)8	1943	1974	aacaactggctttttatttatgtaagcttaatagctttatattttgcatcgataaaatacccatcaaccaaatgtcttgaatacataatcacaaactggtaagataagaacagtattatttacactgaagcacgtgcaacatcaacctaagttgttttcttttcgttttcagtgttatgttgttaaatgaaaaaaaaactttaactacaaatacatgttaattatgattagaaattatgaaggtgtgtttttacaatgtataatttgtaaagcatatgaacgtgaataaatggggttaacAGAAAGAAAGAAAGAAAGAAAGAAAGAAAGAAaga	--	Cyprinus carpio clone 574848 microsatellite sequence	--
TR51473_c0_g1	1536	c	(T)11(G)12	482	504	aaattggttaactttaaatattaaatgccttaaacatgtttaatgtgtacacattcataactgttcaaatataaacataaaataccgtaataaataaatatgtttctatagacacatgttttataaacattaacaagcatgctatacttttgattacgacaacaaaaatgataattgcattgataattgtaataatatgaaagcgacatcccaaacaggggcggatgcagagggggttcagtggggttgcagggcccgctcgatgccccttttggggcagtaatatttgatttttttttaTTTTTTTTTTTGGGGGGGGGGGGcagcccaagacagccccaaataaacccctttcttgaaatattgcttctgatccttcaatataatagtttcgtatta…	--	PREDICTED: Takifugu rubripes phosphoglucomutase 2 (pgm2), mRNA	--
TR51473_c0_g1	1536	p2	(TA)7	1035	1048	actttagtgagattgggggtggatcgtttaataggtgatgcacttggtgtttattataaaaacaaaagtttaagtaatttattatctgtctatttctgtcctctaacaatgatactactaaatgaaattgacaaacattttctgaccagcgtttgcgaactcgaactcgaactgtgtaccccaggtatatataaactacgaccacggactgtgaactcaggttgtatataaattgcgaccacggactgtgtacccaggttatatacaaactgcgaccacggactgtgtacccagagtgtgTATATATATATATAaacaagtcatatcaggcccaattcgaaaagagcataccatggttaatggagtgtggtgtacaaaatctagactgattatcgggtt…	--	PREDICTED: Takifugu rubripes phosphoglucomutase 2 (pgm2), mRNA	--
TR51786_c3_g9	1687	p3	(AAC)5	1205	1219	ggtcaactgaagccgcttcatttattcttgaagaactttttttcaataaggctgctttgttattttggacaatcgttgaataagtaactgtctaatttactatccatgatttaaatttagcaatcatgtataaattaataggaaattgataatattgatatttgagggatgtaatgtttgttagtttacacttttccaagctgctttttgtgtggcttttggcgatttggtgatagtgaatatggacagacattagaagttaaatatataagcggagtatcacctacgtataatttagaaAACAACAACAACAACagtgcccgctggtaattaaaaatcagttaaacgctaatcacacctttaatagagtgaagaaaaacctttcataacagcaagcta…	#N/A	#N/A	#N/A
TR38549_c0_g1	2971	c	(T)10gtttttcacagaaataaagttcagatagtttcag(A)23	2905	2971	ttatatctctctcagacagttataataaatgaacaaaaatatacaaaaaaatagcaaaatattttttttacagtttcctttgcaagtataatattgttgataaatattaaccaatggaactgtgctatgtattgacgtaggtaattgtaggtttcgttttactgttactgttatatgttctgagaaagtaaggaccgtaaactgcacaacttgagagaagagggaaaggaacgaagtgtttattttaaatttgtcaaatagagagagatttaaaaggttatgcaatgtcattttactgcaTTTTTTTTTTgtttttcacagaaataaagttcagatagtttcagAAAAAAAAAAAAAAAAAAAAAAA	poly(A) binding protein, cytoplasmic 1a [Danio rerio]	PREDICTED: Cynoglossus semilaevis poly(A) binding protein, cytoplasmic 4 (inducible form) (pabpc4), mRNA	Polyadenylate-binding protein {ECO:0000256|RuleBase:RU362004} OS=Danio rerio (Zebrafish) PE=2 SV=1
TR55448_c2_g1	1302	p2	(TG)8	525	540	tctgcttgtgatggtggatcgcttgttgtagtgagcgagtcttgatgcctcggcagcgattctctcgaagatatcgttgacaaagctgttcatgatcgacatagccttgctggaaacaccagtgtcggggtggacctgtctcaacaccttgtagatgtagatagagtaggactccctcctcctcctcttgcgtttcttgtcggtagatcttgcggcctttgccttggtggcggccttcttggatcccttgcttgcaacacccttagcaaccatgtttgttcaatgaactgaatgtcgacaTGTGTGTGTGTGTGTGttgttttatttatagacgccatcggcaagccatgtaggcgtctgtctatagttattcttcttcttgttgaacttctttcttct…	PREDICTED: histone H2B 7-like [Latimeria chalumnae]	PREDICTED: Danio rerio histone H2B 1/2-like (LOC560748), mRNA	Histone H2B {ECO:0000256|RuleBase:RU000451} (Fragment) OS=Latimeria chalumnae (West Indian ocean coelacanth) PE=3 SV=1
TR16786_c0_g1	1381	p3	(CAA)6	633	650	ccgcatgtccaaagacgtgcaatctctgtggtctggagtgttatcaatgcgaccaacaagtgaccgactttaccgcgtgtaatcagacaataacttgtccagccggagaaagatgtatgcttcgaacggcaacctcttcaattgatggtcaccatgagtattttatgcaatgtgcaaatctggcgacgtgtgatgggatagagtttaggaaaagaggcattgtatctcagtgttgctctgaagatctatgcaattatccaacctatcgacaaacaacaccatcaacaccctcaacaaaagCAACAACAACAACAACAAcactctcaacaacaacttcaacaacaacatcaacaacaacaacaccctcaacgacaacaactactagaagtcacctcacta…	PREDICTED: mucin-2-like [Maylandia zebra]	Hucho taimen clone ZA-9 microsatellite sequence	Uncharacterized protein {ECO:0000313|Ensembl:ENSPSIP00000000064} OS=Pelodiscus sinensis (Chinese softshell turtle) PE=4 SV=1
TR21327_c1_g1	4384	p3	(TTC)5	676	690	tgagcataaagtttaagttaaactagtttattttttatttaaaccactttttagagaccccagggcagaaccaaaagtttgcagcaacattggtgtagatcttgctctaagtaacaaacttccagcctctgcttcaaatcctttctctcgaagctgattgactaatccttcaactgacaggtaatcatgtgacttgtcatctggatcttgattggccagaagatacttcagaatgactggataatgaggggtgggtacaaggtaaggtaccaaatggtgtttcattataagagctataagTTCTTCTTCTTCTTCatttatctgcggtaactgtgacaaaagttccatagctacagggaagatcttctggtgttccattatcagagataacttgacagc…	PREDICTED: LOW QUALITY PROTEIN: neuroblastoma-amplified sequence [Aptenodytes forsteri]	--	Uncharacterized protein {ECO:0000313|Ensembl:ENSLACP00000004314} (Fragment) OS=Latimeria chalumnae (West Indian ocean coelacanth) PE=4 SV=1
TR29864_c6_g5	1713	p2	(TA)6	169	180	gtagatccagatcagccccacatctgtgccatctgatctggatctgcccttttcactttatgattcattaggttaaatctgaccaaaatgcggccagtgcaaatcctgatcagacagcaatatctactggctgatctggatccagactggttgccatgagtaaaaatgTATATATATATAtggaggaaaggtttaaaatgactcaaaagaacccctattttggattttttgcatctgtgtctgggaaatgtcaaaaatgccgagtcaggtttcttttcttgttgagtactgtaatatcattatatttcgcatgggatgaaatttcacgtatttggccctaaggataatactcaaaaccctagcgaaatcaaacaatttaatatctagcttcattagaat…	uncharacterized protein LOC100037064 [Xenopus laevis]	PREDICTED: Xiphophorus maculatus coiled-coil domain-containing protein 12-like (LOC102231254), mRNA	LOC100037064 protein {ECO:0000313|EMBL:AAI28981.1} OS=Xenopus laevis (African clawed frog) PE=2 SV=1
TR49033_c0_g1	1175	c	(A)10c(A)11	633	654	gttgttttttgtcccatcaggaacgaaaagtacaaggtttgtggattgaaacactccgatataaataaatatgttttgcttttgttaaaaaatggtggttctctgtgatgtgtcgcatagatattcttaacttattattatatttatttataaataggcattactatttcgccatcaaattctacaagaataaatatgataatatacttccgacgattcgtgttggctttcacgtatttaatataaaaaacttgtaggacagaagtagaaaatatacggtgttaccaggattgtgttcatAAAAAAAAAAcAAAAAAAAAAAtaacacaacagaacaaaaatttgttcaacgccgattctgtttaaatgtccacattgttgtgagctgaggttgttaca…	#N/A	#N/A	#N/A
TR55776_c0_g1	1922	p3	(TCA)11	868	900	ttattaaatccacataatgtgtagatatattccctatctgtgtactcataacaattgcctttcaaaacactgtattcatcatgaggtccataatccaagtctaaataggattttatatctcttatactattttctgtatcccgtaacttgttctcagcttcagtaaacttttgccgggcttcatcagcagctgcaatcagagtcttggtagcttcatcatattctggcattttttcttcttctgttgttgtattacctcccttgttcacatcgtcaccatcatcagcctcatcatcatatTCATCATCATCATCATCATCATCATCATCATCActgtcatcatcagaatctgtggcaatttcagggctatctccctctacatttggtgtttgcgtggtg…	protein kinase C substrate 80K-H precursor [Xenopus laevis]	PREDICTED: Manacus vitellinus protein disulfide isomerase family A, member 4 (PDIA4), mRNA	Glucosidase 2 subunit beta-like protein {ECO:0000313|EMBL:AFP00062.1} OS=Callorhynchus milii (Elephant fish) PE=2 SV=1
TR15506_c0_g1	2907	p3	(TTG)6	2512	2529	cttctctagaactcggctcaatgcctcaaaatacagagtacatttggaatctgtgactcacaaacaacaactgtaggaagtctttcatgtgcttaaacttaaacagctgtgtgttgagccatcaaaatgtactttaaagttttaaaagcttccattaagatataaaccaatgctttattgtttttgttatccttttaaaaaaagaaagaaacaaaacaaacaacagttgccatcgggacaagttaactgagaaaacatcatcatctttaccccaaccaatcatgttcatcataaaatagtTTGTTGTTGTTGTTGTTGacttccccaaggggcttccatttcaatgttagatgcctacagcgtaagattttatcttccaaatcccaacattaccgttat…	PREDICTED: GMP synthase [glutamine-hydrolyzing], partial [Pterocles gutturalis]	Danio rerio guanine monphosphate synthetase (gmps), mRNA	Uncharacterized protein {ECO:0000313|Ensembl:ENSLACP00000008506} OS=Latimeria chalumnae (West Indian ocean coelacanth) PE=4 SV=1
TR43133_c0_g1	1085	p3	(TGG)5	32	46	gtgggggtggaggaggtgggggagctccagcTGGTGGTGGTGGTGGtccaggagggggtggtcctgatgggggtgggggagcacctcctgctgctgggccccctggcaaggtctcaggtactactgatggtaggtctggtataacactgcccaacacggtgggagctatggactccagatctgcactgtaagtgacatcatcagccacacctagcaggttgggtaacgctataggtacatcaagttccggtacctctcctatacccgggacatagaaatagttctctgcctgaagcctctgtagctcttcattggttttgattgtgttaggagcttcagccatgcc	WAS protein family homolog 1 [Xenopus laevis]	--	WAS protein family 1 {ECO:0000313|EMBL:AHH42204.1} OS=Ictalurus punctatus (Channel catfish) PE=2 SV=1
TR47858_c0_g1	1284	p3	(TCA)5	634	648	agtggtaagcttcgctaccaaccaataaatcccagcattcactttaatgtacatttaaatgtatcacaaattcattcaaaaaaggcagtatcattataataatttatatttaataccaccagttcaaacaaatcaaacaactatatatctttggaaaagtacatgttcagattcactgattcatttagcattgccagacaatttgactctttttttttgttatttggatggaaaacgtgcaataacaattagtaattcaaactgtttataacactggtcatatcatctgataaaagatagTCATCATCATCATCAgtatttatattgagtaatgtttagatgttaatgcagttttaatggacttgagattcaaaaagaagaaactagccagattgtatc…	#N/A	#N/A	#N/A
TR37049_c0_g1	1062	p4	(GTTT)8	1028	1059	aagaaaaagtgtaaaaaaaacgatattcacccgcggactgttatgtgatataatgaaatcaaactaaacaaacttcaacggcgaataattttaaaatgtaatttgaattttattatttgaactaaagttgtatattttagaaggaaattgtttaatatgtgacaaaaccttatgcaaaacgctcatatgaaacatataatgcaaaacgctcattcacccattatgtgttttttcatcgattcccgatgtttgtctatcatccgttaactgttctattcccgggaggtacataagtaaacaGTTTGTTTGTTTGTTTGTTTGTTTGTTTGTTTgtt	PREDICTED: CD209 antigen-like protein E [Stegastes partitus]	Danio rerio coagulation factor VII, coagulation factor VIIi, and coagulation factor X genes, complete cds	Uncharacterized protein {ECO:0000313|Ensembl:ENSORLP00000022410} (Fragment) OS=Oryzias latipes (Medaka fish) PE=4 SV=1
TR54545_c0_g1	1683	c	(ATA)5aataataacaataagttaaaatcactttccactaaaaccattaaagtaataatgacttcaataattgtaaacgttattac(A)10	455	559	catacagtcaggaaagcaaatgaatataatgagtatgcatgtatattgcgttcgttatttgtgttgtttatgtcctccagcagtgtcaaactggttaattaatgagatcagttttctgttagtaaaaattttagccattgattctagaattcttttgacgttctgtttgtcaatatttaatgacactataaagggaaaacaaaatgtatatctttaaagtggtgagattcatcttcggacaattttaattattttaaattgaataattgttaaattaatgaacatacataaaaatcaaatATAATAATAATAATAaataataacaataagttaaaatcactttccactaaaaccattaaagtaataatgacttcaataattgtaaacgttattacAAAA…	PREDICTED: interleukin-17D [Python bivittatus]	--	Uncharacterized protein {ECO:0000313|Ensembl:ENSLACP00000008474} (Fragment) OS=Latimeria chalumnae (West Indian ocean coelacanth) PE=4 SV=1
TR39267_c2_g2	1970	c	(TCA)7tcttatgtatatctattggggaagcattgttagcaaatgtactgcaaaacacatcagtgttcttttaattttcaggcctcaacattggtggtatgg(TCA)6tt(ATC)8	1531	1691	tttacttaaaatttatgaagaaatcctagtttttcagtctcttcttgtccttatatgttggattaatattgctctctgaaacttttctaggtgatggcagtgtaagttgcatgttctctaaacataattttatcagtattaattaaagttttgctttaaaaaatttatgttatgaatttttgcttggccttatgcctatatgtatcttatgtatatctattagggaagcattgttagcaaatgtactgcaaaacacatcagtgttcttttaattttcaggcctcaacattggtggtatggTCATCATCATCATCATCATCAtcttatgtatatctattggggaagcattgttagcaaatgtactgcaaaacacatcagtgttcttttaattttcaggcc…	unnamed protein product, partial [Tetraodon nigroviridis]	TPA_asm: Oryzias latipes strain Hd-rR, complete genome assembly, chromosome 18	Chromosome undetermined SCAF5157, whole genome shotgun sequence {ECO:0000313|EMBL:CAF88611.1} (Fragment) OS=Tetraodon nigroviridis (Spotted green pufferfish) PE=4 SV=1
TR15162_c0_g1	1370	p2	(AC)7	98	111	aataattaagattataaaaaaaattgctgatgtttaagtttattattattgtttaaaattatattcaaataccgatttattccaaatattgaattctACACACACACACACaaaacgaagaagtgttgttaaaatcatttactgttctctaaaatcataaagaagtgcatatattataggcaaatgttacaatcatatcatgcaagtgcatattcaagatcagtcttaatggtaagtcttaacaactcaagattttcgacttctttgttaaactttgttaacatgtgttcgagaaccatttgataatatgtttcactctgttttggttggtctgcttccagccctaacggtctcatctgtagaaggatctacgaagtctttcccttctggctcaaagta…	PREDICTED: phytanoyl-CoA dioxygenase domain-containing protein 1-like [Lepisosteus oculatus]	--	Uncharacterized protein {ECO:0000313|Ensembl:ENSLOCP00000018320} OS=Lepisosteus oculatus (Spotted gar) PE=4 SV=1
TR55751_c1_g1	1318	p2	(AT)6	1234	1245	ttgatattacatcctccatgttttaacaaccactgaagggcctccaagttaccagcagcagctgcatcatgtgctgctgttgccccaatatttgatcttctgttcccatggaatcctttttcattaacaagatatcctaaaacgtctgcccctccctttctcgctgcatagtgcaaacagttgcatcctaaattgtcaataatattttcagacaccgactgatcgcgaaaacgtttaagcgctgctaaatccccatctcctgcagcttctaaaactgcaactgctaccattttattagcaATATATATATATtatttttgtcgttggcttaatttaacacctttcccaatttgtttacatttccgggtctacaggtaagggtaag	PREDICTED: espin-like [Lepisosteus oculatus]	--	Uncharacterized protein {ECO:0000313|Ensembl:ENSLOCP00000006081} OS=Lepisosteus oculatus (Spotted gar) PE=4 SV=1
TR57063_c0_g2	1470	p3	(CCA)6	1154	1171	cggcgacttggtctatcctcaaccatacggatcttgcgaccattgatctctgtaccatctaatttctctattgctctcttcatctctgctttagttgagaagtcgacaactccctcatttttcctctgcttgtgggcatcagcataggtgacttctccagcctgtctcatgtaatccttcaggtcctgccagcttgcccgagatgataaattctccactatgactcgatagtctgttcttgttggaggcccatattttgacagccagcttggatctctcctgtaactctccctcctgccgCCACCACCACCACCACCActgccaccatatccaccaccgtaactgcctccacggtcacgtcgagttccccgggcatgctcaatcaccaccctttctccc…	PREDICTED: serine/arginine-rich splicing factor 4-like [Neolamprologus brichardi]	PREDICTED: Latimeria chalumnae serine/arginine-rich splicing factor 6 (SRSF6), transcript variant X5, mRNA	Uncharacterized protein {ECO:0000313|Ensembl:ENSDARP00000016544} OS=Danio rerio (Zebrafish) PE=4 SV=1
TR14603_c0_g1	1246	p3	(CTG)5	525	539	acctctgaaatttactccaacacatctgtcctcatatcatttcacgttcagggaagagcttacaaaactttgccatttctccttacaatgggaagataactcctggagtttctactgttcattatatgttctctaggttctccgtccagttaaggaagagatgtctaggtaaagtacaaccttttcaaaatggtttctgtcctactaggttgtccaaccttccatccgaggtctcttcatcatcggaccgtcatagtcacccatgccgccaccaccacagttcatctgctgctgcaccgaCTGCTGCTGCTGCTGttgatgctgttgtggtggtggcgcttgctgcattccggcagacggtgacggacaatttgtaggtgactgggagagatgtggaga…	Myocyte-specific enhancer factor 2A, partial [Buceros rhinoceros silvestris]	PREDICTED: Neolamprologus brichardi bromodomain-containing protein 4-like (LOC102787456), transcript variant X3, mRNA	Myocyte-specific enhancer factor 2A {ECO:0000313|EMBL:KFO88272.1} (Fragment) OS=Buceros rhinoceros silvestris PE=4 SV=1
TR25862_c0_g1	4208	p3	(CAT)5	1594	1608	tgattgactgaaaggcgtctgatgaccggtcaatatgaccctgctgctcatcttgcaactccttgaataattgattaagactcatgatgagtgttttggcagtgtgaactttgttgatttctcttgccttgctcattgtggccttgataatgtcaccatagtcattgtaaaacttcatgtagtgtttgaacatgggagcagccacccggatgttgaggacattgtacactatcagtttgcagaaacaagccaggaagttacgtcttttgtgcaattcttcaattttaatgttctcatctaCATCATCATCATCATcttctaggaagactttctccatgaggaacgagctgagttgattctgcaggcccctgtctggttcgaacactagaggtcgcagca…	PREDICTED: cohesin subunit SA-1 [Columba livia]	PREDICTED: Esox lucius stromal antigen 2 (stag2), mRNA	Uncharacterized protein {ECO:0000313|Ensembl:ENSMGAP00000001576} (Fragment) OS=Meleagris gallopavo (Common turkey) PE=4 SV=2
TR10598_c0_g1	1704	p2	(AT)8	640	655	gtcgtgatcctttattacattgagacaaaatgtccaaaatcattaatgtatgagattttcaaaattaattttataaaaaagaaagaagtccatacatatattttaaaatattttatcaaatttacactcttaaacattttatcaaatgtacactcttcaatttcaaatttttggatgaatgtccgttttaaagaatacagaattcttcataaaacccatgcgaaatttcgaatttaaagagagtaaattttataaaattttacaactgacttcccttttgtaatactttctgtatttctgATATATATATATATATgttttcgtgacaatcctatagagcataatagaatgaagccaaacaatcatcacaattgccatcctatttgtcaaactgctgtc…	#N/A	#N/A	#N/A
TR57425_c0_g1	16174	p3	(TTG)5	4762	4776	caatggtataccagctgccagtgcctgctgcttctgtaactgttcatgcagcatcttgaaatgttcctccaacctcttcttctcttgctccttcttcatcatctcctctctcttttgttgttcctggatctctttcgtcttcatctgctcctgaagtttcttgtgctgctcctctaacattttcttgtgttccatttgtttcttcagctccatttccttcagcttcacatgatgctcttgttgtctctgcagctgaagctctgcctgcttctggtccagaagcttttgctgctctgctgcTTGTTGTTGTTGTTGctgctgctgatcatttgttaggttctccatgtacggtggtggagggtgttttgatggatcagacatagatgatgtgacaacact…	PREDICTED: msx2-interacting protein [Pseudopodoces humilis]	--	Uncharacterized protein {ECO:0000313|Ensembl:ENSLACP00000003659} (Fragment) OS=Latimeria chalumnae (West Indian ocean coelacanth) PE=4 SV=2
TR9072_c0_g1	6629	p3	(TGA)5	5334	5348	taggaaatgcttgaaacctacaggggaagtaaattgggtgcaatgtgatcgatgcgaggagtggtttcacctgctgtgtgtgggcctggctgaggacgaggtctcggaggaggaagaatacgagtgtttcaactgcaaacaaggccgcggccaggaaccagtactggtcggaaatccgaataaactgagttccatctcatcaagtaaaatgtccagcatgtataatgtgaattatagcggagtgtcggtgattaaggcagagtcggacatggacaattctcttcagtgtgatgaagaggtTGATGATGATGATGAcgacgatgatgatgaagatgttcatatggaaatgtcgaggccttcacattatagtatggcatttgaacgttccctgattgggtc…	PREDICTED: lysine-specific demethylase 5A isoform X1 [Callorhinchus milii]	PREDICTED: Zonotrichia albicollis lysine (K)-specific demethylase 5A (KDM5A), transcript variant X2, mRNA	Uncharacterized protein {ECO:0000313|Ensembl:ENSONIP00000012263} (Fragment) OS=Oreochromis niloticus (Nile tilapia) PE=4 SV=1
TR52353_c0_g2	3070	p3	(CAG)5	1754	1768	gaatactccatcatttctcaaggatccattgtcagaatcgcacagcaaatatccatttcatagcaagcaagaaagtgatattcccggtcttgactcaaaacgtgaaagtaatcatgacaccgacaacagagataaacgagaaaggaaacccagtggccaaaaagcaaggcatgagagtgggagaaacgaggtgcgagagagtgaagtgaaggtgaaacgggagaaagaggagaagaatgaacgtgtaaaagaaagaaaaatgaccaaaaatcgggacacctctagcagttcaactagcaaCAGCAGCAGCAGCAGtagtagtggcgattcttcaagctctggttcagactctgacagttctagttcaggttcatcatcaacagaatcatcttcacgaaa…	PREDICTED: arginine/serine-rich protein PNISR isoform X2 [Callorhinchus milii]	Gallus gallus PNN-interacting serine/arginine-rich protein (PNISR), mRNA	Splicing factor, arginine/serine-rich 18 {ECO:0000313|EMBL:AFO96425.1} OS=Callorhynchus milii (Elephant fish) PE=2 SV=1
TR14949_c0_g1	1097	p3	(CAA)7	102	122	ggtaaacgcttttaacttcaatctagcaatataagcctatcttagtttatccaacttgtatcagtgattttttctgcaagtgttgatgtagaacacaacagCAACAACAACAACAACAACAActgatttagttcatagtaaggcacctcctccacttatgagaaaactttttcaaacaaaatacatctcctaaaaatatatcactcacatataatacataaaaaaatcctctatattcaacagctacaaagggaatattttaaaatacagatgctactaaagtggtaaaaaaagaatgttttttttaaaataatttgtgaagtaatatatgtcaactagtgtaagtaatcaaatagttcagtgaaaaaaaatggtatgaaccagttcaaggtatattct…	PREDICTED: uncharacterized 51.9 kDa protein in rps4-rps11 intergenic region-like [Xenopus (Silurana) tropicalis]	PREDICTED: Notothenia coriiceps ataxin 1-like (atxn1l), mRNA	Uncharacterized protein {ECO:0000313|Ensembl:ENSPMAP00000006652} (Fragment) OS=Petromyzon marinus (Sea lamprey) PE=4 SV=1
TR47558_c0_g1	2241	p3	(CCT)6	1942	1959	ccatgacccccagaaggtccattcatcatgtgattactatgtccaccatttgattgttgatctgatctattcattcctggtggacgcaacggagaggccccaggacctcttggagatccaccagttgttctgccaccacctttattcggtaatcgaggaatgccaccagcaaataatccacccagccctccaactggcggcggtggcgctgtactgtcatctgcagatcctctaccaaagggtattggtgcatgtgatcctgaatttggcctgcttgccactgtgttaaactttccaggcCCTCCTCCTCCTCCTCCTcccatacccataggggacggcttcgtattccccacaatcggtccacttctatcatttgttacagttttcttaagtttagct…	PREDICTED: WAS/WASL-interacting protein family member 1-like isoform X1 [Maylandia zebra]	--	Uncharacterized protein {ECO:0000313|Ensembl:ENSONIP00000001657} OS=Oreochromis niloticus (Nile tilapia) PE=4 SV=1
TR9753_c0_g1	4934	p3	(ATG)5	2234	2248	gtaagcatgaagatgatcagaagaaatcacaagacactgatgttgtaaaggatgctggaactgtagcattaataaatcaaccacttgatgtcaacaaagaaagtaattcccatgatgaagccaaggacacgaaagatggcaaaactattgacagtaacatcacaggcaagaagtttgattttgccagtggtactagtgaagacaacaatgacacatcaggtaacatcacacacaaagaagataatgttactgacaaacatagggttgataaagatgatgatgacagctatggttatgaatATGATGATGATGATGtggatgactatgctgatgactatgatgatgatatagttagtgttgcaaaggacagttcggaggaatcagttgagctttcagatc…	PREDICTED: follistatin-related protein 5 [Oryzias latipes]	--	Uncharacterized protein {ECO:0000313|Ensembl:ENSLACP00000023246} OS=Latimeria chalumnae (West Indian ocean coelacanth) PE=4 SV=1
TR26626_c0_g1	1932	p3	(ATG)5	978	992	cttcaagagtaccaccaccattatctgattctccagaaagagttccttcccctggtataactgagcagcgggtggatttgtttgggaatgatgatctatttggtgaggacttaccaaaacctggtgctaaatctgtgatagggcagcggaaggatacaaactctgaaaaaagtagtccagatgatttattccaagctaacaatttgggtttcaagaaatctaaaacagagaatttagatgatttatttacaagtacacaaacaaatagtagtagtacaaaatcgaaacctactgtgataaATGATGATGATGATGatttattttctgctgtgcccaaatcaacaaaagcagacaaatcaaaaagctcaaagttagtgaatgatgatgatttgttgaatt…	PREDICTED: WASH complex subunit FAM21A-like [Struthio camelus australis]	--	WASH complex subunit FAM21A {ECO:0000313|EMBL:KFV82847.1} (Fragment) OS=Struthio camelus australis PE=4 SV=1
TR26626_c0_g1	1932	p3	(TGA)5	1117	1131	agggcagcggaaggatacaaactctgaaaaaagtagtccagatgatttattccaagctaacaatttgggtttcaagaaatctaaaacagagaatttagatgatttatttacaagtacacaaacaaatagtagtagtacaaaatcgaaacctactgtgataaatgatgatgatgatgatttattttctgctgtgcccaaatcaacaaaagcagacaaatcaaaaagctcaaagttagtgaatgatgatgatttgttgaattctgtgccaaagaaaactgaacaaactaagccccctgtgacTGATGATGATGATGAtatttttgctgtgaagaagaccaaatcgaaacccaagccattaccaataatagaagatgatgatgacttgttttcgtcagcagc…	PREDICTED: WASH complex subunit FAM21A-like [Struthio camelus australis]	--	WASH complex subunit FAM21A {ECO:0000313|EMBL:KFV82847.1} (Fragment) OS=Struthio camelus australis PE=4 SV=1
TR26626_c0_g1	1932	p3	(AGA)5	1599	1613	gtgacaatcaaggcaaagattcttcaaagacagaagagagcaaaccaaaagcagttgatgatgatgatatatttgcaactgcaacaacaacaacagaaaagaagaaacccaagaaggcgatgacgaaagacgaggacatatttgctgataatacagatattttcaatgacatacctgctgctaaacctaaagagaagaaagctaagaagaaaacaacaactgctccaaagaaaactatattcaaagatgacatagatgacatttttgctgatacaagtgctgctgccggaaagccaaaagAGAAGAAGAAGAAGAcaacaaaagacaaaccagaaaagaatggaaccacggacgttgttgatgatcccttaatgtcataaaaaatgtgaaacataaact…	PREDICTED: WASH complex subunit FAM21A-like [Struthio camelus australis]	--	WASH complex subunit FAM21A {ECO:0000313|EMBL:KFV82847.1} (Fragment) OS=Struthio camelus australis PE=4 SV=1
TR2743_c0_g1	2108	p3	(AGT)6	2090	2107	acagaacaccctttgcttgctttgttctatatttaagataatacaaactcgatttattttgtaaggagaatgtggtttttctccggtacgcaagaacgcggatgtgtgaataaagagagctgtttgaagtgaatcgatttaacaaatattatttcattcaatataattgactttttaaatactcggtcgatgttgttgttatcgttgttgttgtagaagtacatgtagcatttgccgtattgaaagtagtggcagaagaagtagtactagtagaagtcatagtatgtagtaggtagtaaaAGTAGTAGTAGTAGTAGTa	unnamed protein product [Oncorhynchus mykiss]	--	Oncorhynchus mykiss genomic scaffold, scaffold_21603 {ECO:0000313|EMBL:CDQ96482.1} OS=Oncorhynchus mykiss (Rainbow trout) PE=4 SV=1
TR50603_c0_g1	1148	p3	(CTG)5	32	46	tcatcttctgcggggtgatcaccggctgctaCTGCTGCTGCTGCTGcttctgctgttgtttcaacttctgttgcggcaagtacaagcccaagatgccggatgaggaaggagaatatgctaacctgcatgaagaagatagtagctccccgagtgatgatgaaaagagaacaataaccacccaacctggtgccggcgagggggtcggagcgattgcaatgccaccaccaccagacaaaagtgaaaacaccacattaacatcagaatacaaaccaaagtatggagccgacggttcctcattagagaagagtgacggagttctgactgacagttaacctaatagttgtta	PREDICTED: dnaJ homolog subfamily C member 5-like, partial [Apaloderma vittatum]	PREDICTED: Stegastes partitus chromosome unknown open reading frame, human C19orf26 (LOC103371180), transcript variant X2, mRNA	DnaJ subfamily C member 5 {ECO:0000313|EMBL:KFP99575.1} (Fragment) OS=Haliaeetus albicilla (White-tailed sea-eagle) PE=4 SV=1
TR38220_c0_g4	1778	c	(CTC)5attctcctcacca(TCC)6	1261	1306	agtttccagacacttctgtaagaactgctgtatgctgtttcctttcttcatgcgtacttgtcgtcgatgtcctgagccgtcccagtagctgtatgttatgtcaatctcttcattcttaatctcttcctgtttctgcatccactctgccgcaatctgctcccgtagtttgttctcagcttcctctctgtccctgtcaggcaggaaactggtgtccacatcgggattcataccaagtctcttttttctgctactagcatcctccaatggtttcctattctcctcgtctctactgccactgggCTCCTCCTCCTCCTCattctcctcaccaTCCTCCTCCTCCTCCTCCgggtcaaatgacagagcagcaatcttcattttttcttttcgttttttctcttg…	PREDICTED: protein FAM50A isoform X1 [Latimeria chalumnae]	PREDICTED: Poecilia reticulata family with sequence similarity 50, member A (fam50a), mRNA	Uncharacterized protein {ECO:0000313|Ensembl:ENSLACP00000015042} OS=Latimeria chalumnae (West Indian ocean coelacanth) PE=4 SV=1
TR38304_c5_g1	2233	p3	(TCA)7	552	572	ttctttttccttgagtacatgatttttttgtataaccgcttctttttcttaggtatcatcatttctgccagcttccgttcttctgctgtcagcagttgtaaccgtctgtcaacatctaccgtctctaccgctccagcttcaaccgacatagtgctggtgttctgattctcttttacatccccttttctctttttgtttggggcagtagtttcttttcctgacatcttccttttcacagtcttctcttcctcttcttcaccttctgattcatcatcatcatcttcttcctcttcatcactcTCATCATCATCATCATCATCAgtgtcctctccctcttcctcctcctcctcatcatcgtcactgtctatctcctgttcttcatcatcattctgatcatct…	PREDICTED: LOW QUALITY PROTEIN: pescadillo homolog [Meleagris gallopavo]	PREDICTED: Cynoglossus semilaevis vezatin, adherens junctions transmembrane protein (vezt), transcript variant X3, mRNA	Pescadillo homolog {ECO:0000256|HAMAP-Rule:MF_03028} OS=Latimeria chalumnae (West Indian ocean coelacanth) PE=3 SV=1
TR20673_c0_g2	2160	p5	(ACAGA)5	277	301	aaagagaggtaaataattataaatacgtacttattaacaagatagtaatacaaacaaaggcactgtttctgatcgagctctagctttaataatctcggatatgatttataattgttgtattaaagtttggggtttaaaaagagataacaaagatagttcgatttgatttattcaaacgctagtctaagaataccttttctactctactgtactatattttcaagccatgcatgcagggtattaaattacaggtacatgtcagaaatagctaacactACAGAACAGAACAGAACAGAACAGAacatttcttttatttgaatcaggttcacaaagaacaacatgataataatatacgttacaataatgggataatggcagacagtagtaatttgtcaagtt…	Heat shock 70 kDa protein 12B [Chelonia mydas]	--	Heat shock 70 kDa protein 12B {ECO:0000313|EMBL:EMP31892.1} OS=Chelonia mydas (Green sea-turtle) PE=4 SV=1
TR2732_c0_g1	2430	p3	(GTT)6	983	1000	gtagccactttgtcacagtacttcaagtgtggaatatctcgacagctgaaacactgcatgctacttgtcgtattagagtgggtagacgttgtcgttgatgatgtaattgttgctggtgctggcgtcgaagcagtcgttgaggtgtaagcagaagtactatcaagtgccgcggtggttgttggtagtggtgatgttgtcgttgttgcttttgttgtcgatgttgttgttgatggttgtgtagtcgttgttgttgtcgtcatcgttgttgctattgttgatgatgttgttggttgtgaagtcGTTGTTGTTGTTGTTGTTgtaagtacttggcattcttcatctttaagtgcaaacttgagaggatatccgtaggcggctgcagcaccaggaaggctgtag…	PREDICTED: IgGFc-binding protein-like [Astyanax mexicanus]	Cyprinus carpio genome assembly common carp genome ,scaffold LG41	Uncharacterized protein {ECO:0000313|Ensembl:ENSAMXP00000003966} OS=Astyanax mexicanus (Blind cave fish) PE=4 SV=1
TR20091_c0_g1	1262	p3	(TGA)6	601	618	tgcacagttgccaaacttggtaaataggaaaggaatcgcagttcgtatcaaacaaacggatccggggctcggagctgctgcttggcaagagttggtcgataggctttcggaaacttcggaggataggctttcggcaacttcggaggaaagtgatatagatttaagtggtgtagaattcagcacagaaaatggtaaacaagtttggagggttacaggaacaagtttgcttgaatgtttagttcgttatcaagccgttgagaagcatctggctagaatgcccattgaaccggatgctgaaggTGATGATGATGATGATGAttttgatccctctgctagtgaggataatgatgattgcaatatgtcggatttgttagatgcgtaggacgacgatgatgtatg…	PREDICTED: LOW QUALITY PROTEIN: uncharacterized protein DDB_G0271670-like, partial [Tauraco erythrolophus]	--	Uncharacterized protein {ECO:0000313|Ensembl:ENSAMXP00000025890} (Fragment) OS=Astyanax mexicanus (Blind cave fish) PE=4 SV=1
TR46219_c0_g1	3661	p3	(GAA)8	912	935	acagcatctacagttcctgccacaaccacttctcaggccagacctgtgataatactgtccgttcctccaagaatcattccagacattcagttgtcagcttctccaaccatagaggcacaaagaacccaggagagtgttgtaacaacaagggacgctactccagctacctctacaggagaaactactgcaacaataactacacccagacctgtgatgacaactttctctaataatataacaacaataatgaattctactcctaaatatagaaccagatttgaagatagtgagtctgaagagGAAGAAGAAGAAGAAGAAGAAGAAagtgaagaggatgttccggaggagctcccacccatcaagggagggggcccacgtgtgtatgaggcagaaatcaag…	PREDICTED: phosphatase and actin regulator 2 isoform X3 [Chrysemys picta bellii]	PREDICTED: Oreochromis niloticus sema domain, immunoglobulin domain (Ig), short basic domain, secreted, (semaphorin) 3B (sema3b), transcript variant X1, mRNA	Phosphatase and actin regulator {ECO:0000256|RuleBase:RU301113} OS=Anolis carolinensis (Green anole) PE=3 SV=2
TR23928_c1_g1	18274	p3	(CAG)5	13590	13604	agaagtgacagcagagaacgtgagagaaaagctaataagagcaaagatataaagaaagagtctgctttggagaagtttgaaaaggaacttgctgaaaagaagaaaattcttctccaacctatctcatcaactccagtaagcatgtctgtttctcagccaatgatatctcaatctggacaagtgtttgcgacatcttcagacccaaatgttcaaatgcaatatgttgatgctcatgggcagtttgtgcaaatggacccttcagctgcccctcacttccttccacagcccttccctgttcatCAGCAGCAGCAGCAGatgctaatgtttccaatggggccacaaggaccagacccttccttcacaggtttccaggctgaccctaacatgttccccactcaa…	PREDICTED: histone-lysine N-methyltransferase SETD2 isoform X5 [Callorhinchus milii]	PREDICTED: Taeniopygia guttata SET domain containing 2 (SETD2), mRNA	Uncharacterized protein {ECO:0000313|Ensembl:ENSAPLP00000004480} (Fragment) OS=Anas platyrhynchos (Mallard) PE=4 SV=1
TR36207_c1_g1	1880	p3	(CAT)5	619	633	ctcagccctataaccttggggcctgtacagagatcagtctgatctgtagcagtttaacatacataatgacataatactttttcagcagaacaaaaatagtaagtcaaaaatcgtcagttgaagtgactgttctgtttcttccgaaaatccaagctgcatgagaaaagtaaaatgaatcgaagttcctctaggcgtcagatcatcacaacgacaggaaattacgcctctccagatgaaatggtgatttagttctgagggtacccctcagttgtctatgaggaatatactattctgcatcagCATCATCATCATCATgtgctgattttaaagtctctctaaaatcttccttggattttttggacattttggcaaacttctgttctgttttgttaactttac…	hypothetical protein UY3_00024 [Chelonia mydas]	--	Uncharacterized protein {ECO:0000313|EMBL:EMP42701.1} OS=Chelonia mydas (Green sea-turtle) PE=4 SV=1
TR26169_c0_g1	1958	p2	(AT)6	613	624	atattatacatctttcatcttggtgattgagaattgtacagtaatcgtattgcaattaggagaccgtttgtatctgatatcatatcgtattaagattataaattgtcttacagtttccatttaaccctatacattccgttccaaaaattgtgtttgcaccacaacagcaagaatagcgatgatgctggagtttccattcaacgctgaactagggatttgctgatttttaagcgtaaaaggaactgtgtacgctcgtgtatacagtgttcgctcttgtatacagtgttcgctcgtgtgtacATATATATATATgtgtctgttaaatataagacattatttattttaccgaactgattggaaacattgtaaccttcaaatttcttcaaacgaaagagcacc…	#N/A	#N/A	#N/A
TR39453_c0_g1	1922	p3	(TGA)5	1544	1558	aaaaactgagcctaaaactgacgatcaaatagttctgcttgacaatgacagtgattggtatgctgttccaagaaataaaaaaattccacctttaagaaaatcttccagtggtcccggaatctgtgataaaaaattgccatctaatggcgagaacgatctaggagaatatgagttcctggcggagaaacctcgatctccagtcaggataccagacagcgggatgtcagtgaatggagatatcattgacgatacgtatgaagccacttggaattgttccagtgctagaaggcgtagtttgatTGATGATGATGATGActgttgtagtaaactaaaatcagaaggtgctcatgtaaatgaatctaatgcttatgcccagagtaaaacaactgctaactttga…	PREDICTED: uncharacterized protein DDB_G0271670-like [Cynoglossus semilaevis]	--	--
TR7521_c0_g1	1671	p2	(AT)9	1436	1453	gcagcaagcaatgtctaatgctttacttcattaagtcatttcaaggtattatgtcatttagtgttagtgaatctttacactgcataaaagatacatttttgtgttgatgttgaatctgattttttttccaatatttaaaagcagaacaagactaaatttataatgttttattggaacccaccagactaaattttcttagtgctctagccttttgtattatgttacaaaacttaacattttcattcttgtgttttcacatattattcaaatgtcacactgtcttagtaaagctcaacacacATATATATATATATATATagcttttttaaattgttaacaatacatattcatgttatctaacctaacaatttaataaaacatcattgtgttcagtcgaga…	--	Cyprinus carpio genome assembly common carp genome ,scaffold 000029036	--
TR21825_c0_g1	2388	p3	(TTG)5	2367	2381	acgtgtgctagccattctgtcttatttactttccactgtcagcagaacatgaaacctgtaactgtttgtgatggttggccttctataattatctacgtccctatttcggcataggtcaagtttataacttggtacgggtcaagttctaggacggggcaaagtagcaaactccgttactgagctcaatttacttttattggcattgaaaatgtattacagttgagaatcttaattcaatcaacaataaatggggaaaatggtgtttgcataccactaccattaccaatgttgaccgtatttTTGTTGTTGTTGTTGtttttaa	PREDICTED: very long-chain acyl-CoA synthetase isoform X1 [Danio rerio]	--	Uncharacterized protein {ECO:0000313|Ensembl:ENSDARP00000080769} OS=Danio rerio (Zebrafish) PE=4 SV=1
TR32836_c5_g5	1936	p3	(GAG)7	643	663	gatttagaggaggatgatttcatggatgagcttggagatgaggaggaagaagactcggaaactgaggctccagaactggttaaaaccccgaagagaaagaagggctcagaaccgaacgttccaaagaagaaaactaagtggctaacacctggaggaactgagttttctgatgactctgaagaagattctgatgatgaggatgaagatgaccctgatgctgatatgactagagagtttttggatgatgaagcagacgaagatgatgaagatgacagtgactttgagatggatgatgaagatGAGGAGGAGGAGGAGGAGGAGgatgattatgatgaagacttgctgcaagatcctaccagatcaattgatgtcacagttccaatgcagccaaagaacgga…	PREDICTED: LOW QUALITY PROTEIN: uncharacterized protein DDB_G0271670-like, partial [Tauraco erythrolophus]	PREDICTED: Cariama cristata high mobility group box 1 (HMGB1), mRNA	Uncharacterized protein {ECO:0000313|Ensembl:ENSPMAP00000010254} OS=Petromyzon marinus (Sea lamprey) PE=4 SV=1
TR13406_c0_g1	1002	p3	(TAT)8	37	60	tactgacttcccttttggaagattattttattgtgaTATTATTATTATTATTATTATTATtaaatgccctatctaccacccagtgcgctaagaaaatctgagaaaaggggggatgctgaaaagggaacgaacataaagcttacataataatcaagaagcaagaaaaacattgtattgtttgttaatccaaagctaaattgaaactgaaaattactttttgcaaataaataaatctaccaaaatgcaaaaaatgaaggtgtaaacagattatttattgctcagctgacttagtagataaactgaaaacactgatattgatattgaaaggcgacatttatttttttataacgggctctcatt	--	Cyprinus carpio genome assembly common carp genome ,scaffold 000007248	--
TR26245_c0_g1	1641	p4	(CGGA)7	2	29	cCGGACGGACGGACGGACGGACGGACGGAagtacggacggacggaaagacggacggacggttcaatcactagatgccgggggcataaaaagtgaatggctttgctgacttagctcaaagattttgaaatgcttattatgataataatggtgaaatctctccatttaagctgaacatataaactgagcaaaaatgaaaacttgacactgttatcttttcatttttttcttttattgttaaattaaatattaagaacagtacgcatagcaaatgaaaacgttgtgactgcgttaatttcgtgaaattgtacagtcacgtgcattccgttac	unnamed protein product [Oncorhynchus mykiss]	Zebrafish DNA sequence from clone CH73-52D20 in linkage group 16, complete sequence	Transposase {ECO:0000313|EMBL:JAB53081.1} OS=Micrurus fulvius (Eastern coral snake) PE=2 SV=1
TR28712_c11_g6	1189	p2	(TA)6	1103	1114	tctgacggagtagcaggaaacacaaattatggccaagtgttttttaaaagagtgaaaattgttgagcagaagtcaagattttcaatcaaaactacccactacttttaacttgcgaatgttttaattcataatcactatcaacagtttgaagattattgtgatctccaaagacaaggttacgacgtaatactatatcgacctcataacacgactggtaagtttgtaacttaataagaagtatttttcatacaaacaagtacttttcaatgttcgtttgaacgttcaatttcccagcttttcTATATATATATActcaacaaaaataaaaagcatccaccttcctatcttaaattttgtaaaatttgaaaacgaaaacttagaattctg	#N/A	#N/A	#N/A
TR25507_c50_g30	1530	p3	(TGA)5	638	652	tgcaatggattaaatcagtattatatagcaaatttacatcaacaatttacgacagactaaatagaaattccaataaactccaaaattgtacaactgacatcatacagatttacagtagattgtacaaatacacatcactactctgtaacacccagatttgttacctctttaatcaatcatcaagtttataattgttagtgttttgtaatttttgttcaatttttaagaaattgcttttgttaccatggttacccattctccagaactcttcaaaaagtttctgtcagtataatgattgatTGATGATGATGATGAcgatgatgcaataatcaaagtaacaaatatcactcaatacactgacaaaaactttgtgaacacagcatgcctttttacacacct…	PREDICTED: ADP-ribosylation factor 1-like [Cynoglossus semilaevis]	PREDICTED: Poecilia reticulata ADP-ribosylation factor 1-like (LOC103468656), mRNA	Uncharacterized protein {ECO:0000313|Ensembl:ENSXMAP00000009214} OS=Xiphophorus maculatus (Southern platyfish) PE=3 SV=1
TR56753_c0_g1	1439	p4	(AAAG)7	1409	1436	ttcagttcaaatgcagttctgaaatttttttactcatatattctgatttaaagttatcaaaaaactgtttgagaagaaactcaaatatctgagtttttactcaaacatgttctagaatatttctgctggacttagaattattttaagtatatcaatgatataacaactggaagatttcatttttttaaatttcctatgaagtgttctcagaattggaataaatatgttgagttgaaaaattgagttgtattataatgatcaaacattggttctcaattttgtaagaagctgatacatataAAAGAAAGAAAGAAAGAAAGAAAGAAAGaaa	PREDICTED: protein YIPF5 [Cynoglossus semilaevis]	Cyprinus carpio genome assembly common carp genome ,scaffold 000028871	Protein YIPF {ECO:0000256|RuleBase:RU361264} (Fragment) OS=Tetraodon nigroviridis (Spotted green pufferfish) PE=3 SV=1
TR53192_c0_g1	1822	c	(TCA)7gatgtatcattgtcatcagtaccctctgtattttgccctccttgatcatgatctgcttccaattcatcctcatcctccacacctgtt(TCA)7	1402	1530	gccctagaaaacttctggataccgtcttcacctccactctcttcatcttcatcatcatcaatgtcatcatcttcgcttgaatcatcatcatcaatgtcatcaacatcatcatcccttttgtcactcaagtcatcatcttcttcctgcatgtcttcagagtcttcactatcatcagcatcatcctcgctcccggacataggcacaccttttctcccatacttgggtttcttgacatcaatatccatagcaccaaactttcttctattctcattgaactctacatcatcatcatcgtcaaccTCATCATCATCATCATCATCAgatgtatcattgtcatcagtaccctctgtattttgccctccttgatcatgatctgcttccaattcatcctcatcctcc…	Aatf protein [Danio rerio]	PREDICTED: Takifugu rubripes histone-lysine N-methyltransferase, H3 lysine-36 and H4 lysine-20 specific-like (LOC101067941), transcript variant X2, mRNA	Aatf protein {ECO:0000313|EMBL:AAI24109.1} (Fragment) OS=Danio rerio (Zebrafish) PE=2 SV=1
TR9369_c0_g2	2590	p3	(ATC)5	1562	1576	taaaccagagctgtcaaaatcatcttcagttaaaactgaccaatcaaaagcaggcagtttgtcatcatcaaaatctgtagaccaatcaaaatcaagttctagtaaaagtgaccaatcaaaatcgagttcatcatcaaaagtggacctatcagataaggtgaaccctacaccagaaaaagataaagagaaaagcaaaagtgaagcaaaacctttccagcgaccttccttagattcaaaagttgatgctgcaaagttatttggaataaaatcatccccaattgattccagcaagatgactaaATCATCATCATCATCgtcactgcagtcagctgcaaaatcttccaccagccagggtggacagagtgcagctgtgagtgccgataaacgtctacagatgat…	PREDICTED: integrator complex subunit 12 [Melopsittacus undulatus]	Gallus gallus BAC clone CH261-4N7 from chromosome z, complete sequence	Integrator complex subunit 12 {ECO:0000313|EMBL:KFR08570.1} OS=Nipponia nippon (Crested ibis) PE=4 SV=1
TR9369_c0_g2	2590	p3	(TGT)5	2041	2055	taactgccgctgacttgctgttcttaactccataggatatggatgttatccatgggcaaaagtgtagattcagatcagccagcacatccgtgctaatgaaacagaatacagactgttcgcttttagattgatatggttatttcggacatagaggcaactagtatagatatagatcagacagtgcataaattatatgccaatggttgaacatgcaataaatgtatatttggagtgaagtgttgaaataagcgttagtgttaatttaagttgttgctatttgtcatgttgatatcagggtgaTGTTGTTGTTGTTGTagttccggaagaacttccaatttgtctctgccagagtgattatgagatatcataaatacaattcataaatacaataccgtttga…	PREDICTED: integrator complex subunit 12 [Melopsittacus undulatus]	Gallus gallus BAC clone CH261-4N7 from chromosome z, complete sequence	Integrator complex subunit 12 {ECO:0000313|EMBL:KFR08570.1} OS=Nipponia nippon (Crested ibis) PE=4 SV=1
TR29318_c0_g1	1459	p5	(CAGAA)5	223	247	gaacaaagcaatccctatgtttcacattttttaagggatgaccctatgtatcacatttttttaagggacgacacaaaatcttgtttagaatcagtaagttattaaatattacttattaataatttcctaacaatttatttctagaagtctttaggaatttcttagatttatctcagtcaatctatttagtatgttgtaggaattagggtgtcaattagatacCAGAACAGAACAGAACAGAACAGAAcatatctttattaaactcaaaccaagatacatggtataagagtaaacgatgcacatatgaccatacatataccatgcctggttgccagcatagcatagctactacaaatctgagacaaaagatggttgaatgtgaatgttttaaaagatctg…	PREDICTED: ubiquitin-conjugating enzyme E2 U [Chelonia mydas]	--	Uncharacterized protein {ECO:0000313|Ensembl:ENSLOCP00000008147} OS=Lepisosteus oculatus (Spotted gar) PE=3 SV=1
TR30068_c1_g2	8753	p3	(ACA)5	6677	6691	aggtgtgactcccacaaagtttgtggtggcttctcagggtggaatgcagggtgcaatccttgtgagctctccacagtcttctggcactgtatcagtgctgacctcagggggtcaaagtatagctaggattatctctcctgggaagctgacaactacccctgttgtacagaaagtggcaggaggcactcaggtggtccaggtgaacacaccacaaggtccaagaatcatccgacatgtcactcctcagattgttgtctcgggacagcaacagcagaatcttcagcagaagcagcagcagctACAACAACAACAACAagtattagcagcacagcaagcacaactacaacaagtccttcagcaacagcagctgaagctctccactggtcaggttgtgcaggt…	PREDICTED: nucleosome-remodeling factor subunit BPTF-like [Lepisosteus oculatus]	PREDICTED: Anolis carolinensis bromodomain PHD finger transcription factor (bptf), transcript variant X6, mRNA	Uncharacterized protein {ECO:0000313|Ensembl:ENSXMAP00000008377} (Fragment) OS=Xiphophorus maculatus (Southern platyfish) PE=4 SV=1
TR38461_c0_g1	3802	p4	(TAAG)6	42	65	tttttatctaaagtacctgttgcatctcgtgagcgtgaaaaTAAGTAAGTAAGTAAGTAAGTAAGcaaattctttatttaaagaaggtgacatatttagcaataaactaatcttccatatggccctccttacaagtattaacataaaaaagattaagataaacacgatgatcataaatataacaacgtcacaaaacacaatatgatattataataagaactgaaactgaaaataatgtatctgtgctaatgttgaggtgttttgcatttcatgggttgatgcgtgcgtgtgagcgagtgcgtgagtgagcgtgcgtgtgggtgcgcgagtgtgtgtgcgaggtctatgtgagtgcgtttgcgcaa	PREDICTED: SPRY domain-containing protein 3-like [Neolamprologus brichardi]	--	Uncharacterized protein {ECO:0000313|Ensembl:ENSLOCP00000004829} (Fragment) OS=Lepisosteus oculatus (Spotted gar) PE=4 SV=1
TR18811_c0_g1	3160	p2	(TC)7	3033	3046	acatcgtttttgccggtaactcggcagcgtctcgtcaccgtccagaaacagatcccttaggtcgggtttttcaatccttacacacgaataatagtaatttatgtgtttcattatcaagatgataaaggaaagttgttgaggcaagtgtgaggttggtgcaccctagaacctggtttaaatccccagtggcaatttgttttgccactgaccgttccaaggcggtatccccaagggttctctttttacttaattgtttgttgcgtccttttgaattgacacacttataacatgcatgctcttTCTCTCTCTCTCTCcctctcttcttttgcgctgcatggggaggctgtgttttttgagtgtggcgattcctgatatgcatattattcttttttgtaatat…	PREDICTED: lysosomal alpha-glucosidase isoform X2 [Cynoglossus semilaevis]	--	Uncharacterized protein {ECO:0000313|Ensembl:ENSLOCP00000016389} OS=Lepisosteus oculatus (Spotted gar) PE=3 SV=1
TR10544_c1_g1	2171	p2	(AG)6	2122	2133	aaaatggatacagtgccccgagttaaagtatggcggttgttgaccatctacccctcctagaattagctcgcaagatataatggctaagttaatcggaaatcttcggttactattatgagtgctggcagcgtcagaaggaaaacacgtttcacatttaaatatactgacatcagatatttgatttacacttttgaaggctgtagttgtctcgaaacagcaaatgacacaattataagaatataaatctgttgacactgaagaaattcacaagaaaaagtgacagaagtgatggtcacatttAGAGAGAGAGAGaaagagagagatgaagagagagagaaagagagggagag	--	PREDICTED: Poecilia formosa p21 protein (Cdc42/Rac)-activated kinase 7 (pak7), transcript variant X3, mRNA	--
TR41564_c2_g1	2146	p3	(TCA)5	1853	1867	ccatcatcaccctgagccatctgtagtcgtttagcaggaggaacataggccccttcaccccctgcgggtttattgtcctttacaatgttcccttcagaatccctgagtctaccatatatatcttctttaagttcactttcttcgaagtcatcatcacgttttctttttatttgcatatttgttatgtcagagtcactttcaagctcttcaccctcctcctcaaaagaaccatcatcatcttcttcatcattatcatcttcttcttcatcatcatcatgaccatcatcttcctctacgcctTCATCATCATCATCAaattcatcttcatcactcaattcaccatcctcatcatcataatcatcactatcacttttatctttatccaagatcttaacttcc…	PREDICTED: nucleolar MIF4G domain-containing protein 1 [Takifugu rubripes]	Zebrafish DNA sequence from clone CH1073-251F4 in linkage group 7, complete sequence	Uncharacterized protein {ECO:0000313|Ensembl:ENSTRUP00000025796} (Fragment) OS=Takifugu rubripes (Japanese pufferfish) PE=4 SV=1
TR23208_c0_g1	1072	p3	(GTT)5	185	199	gcatatacgagggctcttcatagtcctcagcattcatagaagaaaaatttatattggtcatttccaaattcgaatcacttttatcaaaagcattaaatatttcattagtttctttagaactccatgcatgtgacggactcaactcaagattaacagtcccaaaagtggatgggttcataggtgaGTTGTTGTTGTTGTTcacagaagctgtgctgtccaccttgtccgttatattgacctgtgttgtttgtgactgatctctccccagattcccatctccactgccttgttccatcggggtatacctgtcggttttcggcatgccagtcaagatgcccgccggaagttgaaacatgtccgaactgttcgaaacctgttgagtctgttgaatttgttgat…	PREDICTED: nuclear factor of activated T-cells 5-like isoform X3 [Danio rerio]	--	Uncharacterized protein {ECO:0000313|Ensembl:ENSDARP00000019575} (Fragment) OS=Danio rerio (Zebrafish) PE=4 SV=1
TR41517_c1_g1	2667	p3	(AGC)5	2393	2407	gacaatattcccctggtctgtaatcttggcattgaggtcatggatcagctgattgctgtcttgctttccggctttactgtctcctgatgcactaagggctgaagcaggggctgatgtaggtgctgagacatgggctcctgctttccactcctttccagtgacagtcttgtactcggccttcaatgctagcagcttcttcacttcagcgtccacctcttgctttgaagctttctttgccttgatgtctcggaccaggttcccctgtgcagtaatgctttcattgagttgatcaccaacactAGCAGCAGCAGCAGCtggggctgttgtgcccgctgtaggtgctggggcaggcttgctggctggaggagtggcctgaccaggcttccagtcctgaccggt…	PREDICTED: bifunctional glutamate/proline--tRNA ligase [Latimeria chalumnae]	PREDICTED: Stegastes partitus glutamyl-prolyl-tRNA synthetase (eprs), transcript variant X2, mRNA	Uncharacterized protein {ECO:0000313|Ensembl:ENSLACP00000013371} OS=Latimeria chalumnae (West Indian ocean coelacanth) PE=3 SV=1
TR970_c0_g2	2168	p3	(AAC)5	1144	1158	cagatcctaataccccaaattccaacatgatgcacgcggatccttcaatggacgctctctctgatacaaacactgactttccaaatccagtacttgatgaaattctacagtcatttaacacgccaactaccgataacttggatgttaatatggcacttgtttattccacaattgaaagtttaacaagccagacacccacatccgtgtcgacaaatgttaaaagtccaagtttaactgtttcgaaccataataaacctcagaaaaaatctacagctcatccagtggcatacttagcggccaAACAACAACAACAACcagaaagaaagatggataaaccgttgttacgtagcttcttgacaatgccgaaggaggcgatccctagacagccccctggtggat…	--	--	--
TR9038_c1_g2	3265	p3	(AGC)5	2332	2346	cagggatcccatcaaggaggcagaacttctgctcatgcaaagattccgcacatttgaagtgagtcagaaggaaatttctgagcttgtagaatattgggatcgcctcaccctaggacttaaacgacctcgcaccccatctgagagatcagatgaagatgggcatatgcaacacccaccatctggaaagaaggggaaagctaaagagaagcatgacaaagagaaagccgagaaagaaagacagaagcagatcgagaaagaaaatgccgagcggctcgcaagagaggcagcagaggcagcaaaAGCAGCAGCAGCAGCccagggagatggtgaggaaggtgaggctgtggatggtcatgtcgaggaagagaaggaagtgatcggagtgccccatatcattat…	PREDICTED: hydrocephalus-inducing protein homolog [Lepisosteus oculatus]	--	Uncharacterized protein {ECO:0000313|Ensembl:ENSLOCP00000007925} OS=Lepisosteus oculatus (Spotted gar) PE=4 SV=1
TR17318_c2_g14	1657	p3	(AGA)5	528	542	ttattttagctttatttttacaatatttcagaagttcaaagagagttcatttaagtttaatttttaccatatttcagaagttcacggcatatcaattggtctcatttgcaaaaatacgagtatatgtgcaaacttttaaatatcatcatttttctagactaaagtggtgaaaaaacagtgcacacaatcaacgatacagtacaattagagctcaataacacttaaaatatttatccaaaactaaacgttcatatggagttgttttcaattctcggttcaaattttaaatacaactgttacAGAAGAAGAAGAAGAtaatttgtttattatagagaactgtaatacatctatacaaacacatacatacaacaaaaatcatccggctcaattgtcctctaa…	#N/A	#N/A	#N/A
TR37681_c0_g1	1343	p4	(AAAT)5	746	765	atgttcctaaaactgaatccggctcgatggcatcaattttaactgtacattgtgatggtgccgtgcctaaaaatggccgaattttcccaagtggcattttcttgcctaacatatactttgaatccctgtatataatcaaggagtatttttgtagtacgtcggtcgggtcttcccacacttgtgaacattaataattgacatcttttggttcaattacaggtagttgcttaggttgtagagtaaatttggaaaaatatatcattctgaatagttaaccatatggagtcactaagcatgttaAAATAAATAAATAAATAAATaaaataaatatatattgtctattcgaaatacacagcataaacagttcctacagcgtacatgcttctgttactccaagac…	PREDICTED: tctex1 domain-containing protein 4 [Anolis carolinensis]	Zebrafish DNA sequence from clone CH73-250D21 in linkage group 8, complete sequence	Uncharacterized protein {ECO:0000313|Ensembl:ENSXETP00000024009} (Fragment) OS=Xenopus tropicalis (Western clawed frog) PE=4 SV=1
TR29647_c0_g1	3410	p3	(CAA)5	3070	3084	gcgcagagacagagagagcttgaggaacgagagagacagaaacagctggaggcgcagagacgacagcaggaagacgctcttaggaaacaacagcaagaggccttgaagaaactccagcaagaacaaatggcaaacatgcagcttccatcacatgcacagtgggcgaacagtcagcaagccatatcatcatctacaggaggcaagtctctgcgagaacaacaagaggaagaggaaagagaggagagggaggagatgcagaaaagaatggaagcacagagacaacaaatgatggctctgcagCAACAACAACAACAAcagaaatcatggacttcaactgtctcaccgccacctagtgctaagtcgctggtagagatacagcaggagcaagctcgccagctc…	PREDICTED: PERQ amino acid-rich with GYF domain-containing protein 2 [Alligator mississippiensis]	PREDICTED: Meleagris gallopavo forkhead box P1 (FOXP1), transcript variant X7, mRNA	PERQ amino acid-rich with GYF domain-containing protein 2 {ECO:0000313|EMBL:KFO82129.1} (Fragment) OS=Cuculus canorus (common cuckoo) PE=4 SV=1
TR10412_c1_g3	1864	p3	(GAT)5	913	927	catgttaccccagaggcatacacacccaggctgctcaagttccagaagcaaggccgcaaggttcaaatgacagaggtggcccgtacaagaagtcagcttcaccctggtgatgtgttcatactggatgagggtcttaacctgacgcagtggaatggtagtgagtgtagcaaggatgagaagtttgctgcagcccaggagtgtcagaagatcatcagtgagagaggaggaagagcccataagtctgttctagatgagagcgaaatctcccctaatcataggttctatgaagctcttgttgacGATGATGATGATGATgagcctgatgcagtgccagagggagaacctgtcctcctgaaggtgtcagatgaggatggctctctggatgcagaacaagtcaaa…	PREDICTED: advillin [Notothenia coriiceps]	--	Uncharacterized protein {ECO:0000313|Ensembl:ENSTNIP00000007931} (Fragment) OS=Tetraodon nigroviridis (Spotted green pufferfish) PE=4 SV=1
TR23713_c0_g1	1118	c	(AT)7(AG)7	614	641	tgaaaatgtcaattagcgtggccctttactcagtcactccaaaatatcttactttctatataaaacacagatatcacattaaactcacaacaccaacaaagtatttttcagttaaataaattaacaaaaccaaataataaatcctttaaaaaaggcaaaaaaaaccaacaaaaaaacatagtttaataccacacctttttgtgcatagatgctggttgtcaactaaaatctcactggctgccaagtaataacaagaacaagagtcatgattgtttgtcatggggagataacatttggtccATATATATATATATAGAGAGAGAGAGAGaaaagggttaaaataaacttcaaaaaatccccaactttgatttggtgctgtactttatatctcaagtattc…	--	TPA_asm: Oryzias latipes strain Hd-rR, complete genome assembly, chromosome 9	--
TR10647_c0_g1	3019	p3	(ACA)5	2971	2985	ctccattctgaccagtccatccaaacaccgtccaccagacattgtccgacgtatgattttaatatgtcgacgggaacacgttgacagtgctggtctgaccctgtttgacagcagtcaacggtttggtttttgtacgccaaaatacaggttgtcgcgcatgctattgtttgagcctcggaaaccatttccttgaccagcaagtaccggcgatccatttctttaggctggtttcgacctgtgtattgactcggtacatttttgacagaacatgttacacagccagagttcgcaaacaccagtACAACAACAACAACAgcttgtagaatgcgatgcttttggtgttcgcgta	Hemicentin-1, partial [Picoides pubescens]	--	Hemicentin-1 {ECO:0000313|EMBL:KFV68982.1} (Fragment) OS=Picoides pubescens (Downy woodpecker) PE=4 SV=1
TR51208_c0_g1	3249	p3	(TTG)5	57	71	ggccgtggaggccgtgctatagtgtgtctattcaagctgctagatgtaagcttatcTTGTTGTTGTTGTTGctgaagctgattattactgccatggtgcggggctttgtcagggaccaacccagcatgagattggagactacctgcaagttgttcattttccactgtacgcagatggccgccagggatagtgacaggtgcccctgtggaagctgaacgttggtggccaggaggaacaacagggggtggaactttgggtcggtctccatgacttgtcaaagagccttgtggaagggaggaaacacgctcagggggatgaggacgctctgggggtaatgttttctgtttgtcactgagtgactgtaagtttat	PREDICTED: rho GTPase-activating protein 17 isoform X3 [Oreochromis niloticus]	PREDICTED: Meleagris gallopavo Rho GTPase activating protein 17 (ARHGAP17), transcript variant X5, mRNA	Uncharacterized protein {ECO:0000313|Ensembl:ENSONIP00000024903} OS=Oreochromis niloticus (Nile tilapia) PE=4 SV=1
TR26171_c5_g2	1449	p3	(GCT)5	1213	1227	atctacaatgcagatttgtgctaaaagtttttctattttagtttgtgttgtaaacatgactgtattgtgagctgtaattagagttaaacaacttctagagctgcccatatacatctgtgtattgtttttaaacattggcatgttgtttttgaacattcattatgcatagtaaagtctgtatatgtaaataacatgttgatatccaccaggtatattttgatctcttctttatttagcctgactacctcggtaaagttttatcaaaccatgtcctctaaataccccctgtacaacaggatgGCTGCTGCTGCTGCTgttgctgctgctgctacggctttatgcattgatttccttcacatatttcctagcttgcttggacagtggtcatttagaagagca…	--	PREDICTED: Chaetura pelagica myocyte enhancer factor 2D (MEF2D), mRNA	--
TR10304_c0_g1	1917	p2	(TC)6	1466	1477	tgataacattcaaattaaaattaacaagcgtttgatacaatttgtaatggggactaagcacatattaatttaaaaaaaaaaagccatgtctgggccatatatcttatgacataaccatgccttaaggatttgaatgcactaccttaattgcgaggaccaataatgtccccactctgccatgttctcacaaatttgccatgtccccacaacgattgtatataaaaggacgcttgtcctcgcagttacggtaagaccgaaaaccgtctctccatctgtctgtccatttcttctctctcttatTCTCTCTCTCTCcctctggctctgtttctcaccccctctctctatctctctctcttttaaacgacattagcatacctattatccgtccctccatctgcc…	--	PREDICTED: Astyanax mexicanus mitogen-activated protein kinase 10 (mapk10), transcript variant X3, misc_RNA	--
TR422_c0_g1	1116	p3	(GAC)5	458	472	acatttgaaataaattattatgttttatagataccgacgcggacagcaccacacaagcatataccataagaaaatgtcaaatgaccatctaatcagtactaggatctctatttccgtcgctcataagtcagtactaggatctctatatccgtcgcctatctagtcagtactgggatctatatatccgtccccttcgctccttggtcttctcattacttctggagtcaccgtctccgacgtgttcgctgtcggtgttagatagagcgtgtcgtggttaatattggcctttcgtttcaacatGACGACGACGACGACaagtagagtgataaccacacaaagaactccaaggaacgtaccgaggacaggaatagcaacgttacgtccttgagcctgcgctgt…	PREDICTED: metabotropic glutamate receptor 5 [Python bivittatus]	--	Uncharacterized protein {ECO:0000313|Ensembl:ENSPMAP00000004137} (Fragment) OS=Petromyzon marinus (Sea lamprey) PE=4 SV=1
TR35969_c1_g1	1227	c	(A)10ctaattctcttattattttgcatttcttctgaaaaactgaaattggattaaaaaaaatttaaaaaagttattagataaaaacagag(A)10	916	1021	tacggaaaaactgaaatcagcttcagagctcctgataatttttatgggtaaatattccaaagggtaatttaccccttgacaattttccacggagggaattcaagatatttaagagggtattttcttataaacgactagggttgcatcttttgtttcagattgaaagatactgttgcctattgggttgtttctttcaagttttatttccatgaaatatcatttttcacaagtaaacacctgaaaatgatatttacaccagcggtttggtgtttattaatgaaataaatcaacaatttactgAAAAAAAAAActaattctcttattattttgcatttcttctgaaaaactgaaattggattaaaaaaaatttaaaaaagttattagataaaaacagagAAA…	#N/A	#N/A	#N/A
TR16472_c0_g1	2032	p3	(CAA)6	1453	1470	gtatctctcgaggaggaaagctcttcagaatcggaggtggaaaaagaacaaccaccacctgaagtgaagaagcctgacccaccctcaccagtaaaaacgacaggaagaggaaagaagcaggtgaaaatcgtcatagaggaggagaaaaaacctcctgagcccgagcccatacctgagcccgtcaaggtcaagctggtactaaagggcccacactgctgggttgatgacgcgaccgttaccagtgacgaggaagcagacggcaatccagagggcgctacgtgtaatatcgagatcgaacagCAACAACAACAACAACAAgatagcaacgcagaaaaggttaacaatttacaaaaagcagacggtaagcctagatctgcattgaaaaacgccacagctgca…	PREDICTED: histone-lysine N-methyltransferase SETD2-like isoform X3 [Haplochromis burtoni]	--	--
TR38769_c0_g1	2377	p3	(AAC)5	543	557	ccggatggaccaacaggatctggcaagagacatctataatgatggagaagggaacagcagattgtaccataccagaaagcacattacacttacagtgtaataaaagtacacgtaagctgggggcgtatagagaccccggaactaatggatattacaagtcagtctcacgtgagggtatgacccgggatgatgtcacagtggagaaaactttacgtgggatacaaattaaaccatccaaatcttttctgacaaagcttcagaagaagaaagacatgtcaacattgaagtttaaaagctccaAACAACAACAACAACcaaatgctgaccttcacaagccagacccatcgaacaagggtttagggagcaattcaaggttccccgataaaattctctatgtgc…	PREDICTED: phosphatidylinositol-glycan-specific phospholipase D [Tinamus guttatus]	--	Phosphatidylinositol-glycan-specific phospholipase D {ECO:0000313|EMBL:KGL74943.1} OS=Tinamus guttatus (White-throated tinamou) PE=4 SV=1
TR54156_c0_g1	1926	p3	(TTG)5	193	207	gcaaactgtgtagatcctgatcagactgcatggatttgctggctgattggtagatctacaatggtctcacacatgacaaatggcatttacatgaaggaaagagtttaaactgttcagtggcacagttacaatattgcagtagtttgtttgcctcttcatcatttcgagctctatattgcatcaacagttccaTTGTTGTTGTTGTTGtagtttcgaggatttagtattttcagactatgttaacggcatcctctcgttcaacacagctgactcaaaagcatcatcctttttgattttgttagtgagtttcttgaagaacctagcacccttactagagcgtatctggacagcatccccttgttcatcttctccctcttccagagcacagctgtccacccc…	PREDICTED: UPF0577 protein KIAA1324-like homolog [Tinamus guttatus]	--	UPF0577 protein KIAA1324-like {ECO:0000313|EMBL:KGL78793.1} (Fragment) OS=Tinamus guttatus (White-throated tinamou) PE=4 SV=1
TR23861_c0_g1	2351	p4	(CATT)19	2276	2351	gagataaatctttttaagaaaatataatcttttaattttatctacatttttcatatatatatttatatatatcgactgcaggtgttggttgactgactgtcctgtctaaatactcgtgcagttagtcaacaaacatttaaatcacatgtatcacaccataattttatcatattttacttgtaattttacattcaactaagcgtgtatcttactgttattttactgttatttaacgtatattttgcattttatttttactgcgcccaaaatgacctcagatgtcgacgggccgtaaaatccCATTCATTCATTCATTCATTCATTCATTCATTCATTCATTCATTCATTCATTCATTCATTCATTCATTCATTCATT	PREDICTED: uncharacterized protein LOC102079324 [Oreochromis niloticus]	TPA_asm: Oryzias latipes strain Hd-rR, complete genome assembly, chromosome 19	Uncharacterized protein {ECO:0000313|Ensembl:ENSDARP00000106282} OS=Danio rerio (Zebrafish) PE=4 SV=1
TR14726_c0_g1	3682	p3	(TGC)6	1051	1068	gcatcgaagttagcacctggaccagccaggtgttgttgttgttgctgttgctgatgaatattatgaaggttaatatgatgcagaccagctgctgaatgaaatgcaggatgcaatgtagggttatattgtggaccagattttaattgggcaagcaattggggatgtgcatcaccagcagactttttagctttgtcaccttcagttcctttacaaccactatgagagtcctcgctctccatcggctctagatcatggatgctcagattctccatctggtttgtttcttcttgcgctgagtgtTGCTGCTGCTGCTGCTGCtgaagctgacctaattggtgcttcctaaacttgtcaaactttttgtggtacagttcatctgattttacctcaccatctgga…	nuclear receptor subfamily 1, group D, member 1 [Xenopus (Silurana) tropicalis]	Cyprinus carpio genome assembly common carp genome ,scaffold 000001188	Uncharacterized protein {ECO:0000313|Ensembl:ENSTRUP00000014055} (Fragment) OS=Takifugu rubripes (Japanese pufferfish) PE=3 SV=1
TR29815_c2_g2	1768	p3	(TGA)8	1	24	TGATGATGATGATGATGATGATGAagaggacagtgaacaaggcgggatatttggatttagatcggtgggtggaaatgaagaggaagatcatgttgaagagcctggtacagacagtggttgcactgccgttgttgtgtttatcagagatgataaggtgtatgtagccaatgcaggcgactcgcgctgcgtcatgtgtcaggctggtaaggccgtggatctgtcgtttgatcacaagccagaagatgaaagtgagaggtccagaatagaggcggctggtggcaaggtgactaatgatggtagagtgaatggaggcctgaatctttc	protein phosphatase, Mg2+/Mn2+ dependent, 1G [Xenopus laevis]	Cyprinus carpio genome assembly common carp genome ,scaffold 000000020	Ppm1g-prov protein {ECO:0000313|EMBL:AAH41734.1} OS=Xenopus laevis (African clawed frog) PE=2 SV=1
TR9071_c4_g2	3344	c	(CAT)5caccagcaaacccgtcagccaccacagcagcctgatcagtacatcgacaatcagatctacagacaccctggtcgacaacaacaaaat(CAA)5	1404	1520	atggctgaattcgattgcataaaacctgtgataacaagtgagccgtcagatgtagacatcagctttggtaacaccgcttacttccggtgtcgtgccgaggggagcccgaaacccgaaatcctgtgggtgaagaacaatgaggttttagatccgcgtgagacacgatatcacgtgctagaagatggtaccttgcagattgacgacgctcgcgacactgaccaggggacttacgagtgcatagcgcgaaatactgccggagaagtaaagacggattctgtcgagctaagaatgagtcatcagCATCATCATCATCATcaccagcaaacccgtcagccaccacagcagcctgatcagtacatcgacaatcagatctacagacaccctggtcgacaacaacaa…	PREDICTED: peroxidasin homolog [Latimeria chalumnae]	--	Uncharacterized protein {ECO:0000313|Ensembl:ENSTGUP00000013353} (Fragment) OS=Taeniopygia guttata (Zebra finch) PE=4 SV=1
TR33184_c1_g1	2491	p2	(TG)6	1698	1709	aaaacttggagggtcagttggcattattgttaccaaagaatccgtcacaaggggagacaaagattgtcatacagagtatagtggaggactcgtgttctggaaatctcaggatattattttatgcaatgaatgtattgagagacacgaaggtgtacaggaatggcaaggaaacattacaagtgctaaaggaaaaactgctgtcatctccatacgtgctagagttcaaagctctcgctattgataccttagtttgccaaaataattgttctaatcatggccactgtgatttgaggacaaagcTGTGTGTGTGTGaggctttctggacacagaatctgttcctgtactggatacatggagaaagtaactgtgattggagtattttatatgttgtgatagtgt…	PREDICTED: dyslexia-associated protein KIAA0319-like protein homolog [Opisthocomus hoazin]	--	Uncharacterized protein {ECO:0000313|Ensembl:ENSLOCP00000007041} OS=Lepisosteus oculatus (Spotted gar) PE=4 SV=1
TR53978_c0_g1	5080	p3	(TCA)7	2075	2095	gcgatggcgccaagagcgaaaattgttgttttctttgtaaggtcggatggtgaagtaattgccgatgctctaactattactgtagaagggatctttgaaaacaaggtggatgtacagttcaatcagactgttgctgcacctaatgacaaaatccagttggagatttctgctgatgtcggttctgatgtccacctgcttggtgttgataagagcgttcttctcttggcgaccggaaatgacatcaccgaatctaaagttctacaagagttacaaggctacgacataaagtcaggaaagagtTCATCATCATCATCATCATCAccgatattgtgcgactggttttgttggagatggcctatttctgtcggcggtgaagatgttaaagacgtttttgatgag…	PREDICTED: CD109 antigen [Chelonia mydas]	PREDICTED: Cuculus canorus CD109 molecule (CD109), mRNA	Uncharacterized protein {ECO:0000313|Ensembl:ENSLACP00000007979} (Fragment) OS=Latimeria chalumnae (West Indian ocean coelacanth) PE=4 SV=1
TR41839_c0_g2	2040	p3	(CAG)6	840	857	ggatgcagaaaccagagaaagctaaagccaagtcatcagctgccaaagctccacccacaccaggtgctcaggctgcagccccgcctcctcctccgccaaggccagtaactccagcaccccaggctccaccagcagcaccagccccggctccagcacctgcacgagctagcggagaaagaatcttctctacaccatatgctcgcacattggcagcagagaaaggagtggacctcagtcttgtgacaggtactggaccagatggtcagattagagctgaggacgtgatgaacttcacaccatCAGCAGCAGCAGCAGCAGctccaccgccagcagtcggtgcaccaacagctcatggggcttttgtagatataccactgtccaatatgagaaagacgatag…	Dihydrolipoamide S-acetyltransferase (E2 component of pyruvate dehydrogenase complex) [Danio rerio]	--	Acetyltransferase component of pyruvate dehydrogenase complex {ECO:0000256|RuleBase:RU361137} OS=Danio rerio (Zebrafish) PE=2 SV=1
TR40261_c3_g1	1879	p3	(TGT)5	1847	1861	cattcataagagatgaagaatcaggactacagggcctgctggaagcagttcccatctttccaatctctttctttggtgttttctgttccttcctggcatgttccatcttactgatatccatgcgggcctcgggcacccactcgtccaagcgcttattgaagtcatcataatgcacatagtacaaaggttttccgttgacttctttcttgccaagtatctccgcccaatgccagccctctccatttgtcagcaaaaccggcagcctacagccctctgtcaactcaaactcaccatccgccaTGTTGTTGTTGTTGTattgtagtttcctccttt	PREDICTED: histone acetyltransferase KAT5 isoform X2 [Python bivittatus]	PREDICTED: Astyanax mexicanus histone acetyltransferase KAT5-like (LOC103039324), mRNA	Histone acetyltransferase {ECO:0000256|RuleBase:RU361211} (Fragment) OS=Takifugu rubripes (Japanese pufferfish) PE=3 SV=1
TR25808_c5_g2	1525	p3	(TGT)5	181	195	cttgagatttgagaccggcctccagatccagttccatgatcttgggcaaaggcgagtactgaacagtatctagaatctgttggaatgtttctctgctatgcagatggtcattatcattgccagaggtttgttgagagggtgtgtccagatgttgaagtagcaccccataccattcccataTGTTGTTGTTGTTGTcctatattcatgttggccatctgttgattcatctgctgaaactgcatctgctgcatctgaggttgttgttgttgtccatacatagccatctggggctgtcgcatggcccccatacctggctgcatgcccatctgaccttgaggcacagttcccatgccaaccattcccatctgaccttgaccttgaggcattcccatcatcccc…	PREDICTED: stromal membrane-associated protein 1 isoform X2 [Melopsittacus undulatus]	PREDICTED: Takifugu rubripes stromal membrane-associated protein 1-like (LOC101066958), transcript variant X2, mRNA	Uncharacterized protein {ECO:0000313|Ensembl:ENSLACP00000023021} OS=Latimeria chalumnae (West Indian ocean coelacanth) PE=4 SV=1
[truncated: 555 more rows]

## Sheet: Sheet2
Table S5. Basic information of SSRs and annotation of SSR-containing sequences in transcriptome of Corbicula fluminea.
Gene_ID	Length	SSR_typea	SSR	Start	End	Sequence	Nr_annotation	Nt_annotation	TrEMBL_annotation
[truncated: 1,195 more rows]
