# Supplementary material for: Transcriptome-wide identification and characterization of the Sox gene family and microsatellites for Corbicula fluminea
Source: PeerJ. 2019 Oct 22;7:e7770. doi: 10.7717/peerj.7770 (PMC6814067; doi:10.7717/peerj.7770)
Supplement: Table S6 [file peerj-07-7770-s006.xlsx]

## Sheet: Sheet1
Table S6. Frequency of different SSR types in transcriptome of Corbicula fluminea.
Motif	5 repeats	6 repeats	7 repeats	8 repeats	9 repeats	10 repeats	11 repeats	12 repeats	13 repeats	14 repeats	15 repeats	More than 15 repeats	Total
A/T	0	0	0	0	0	1124	305	117	51	16	15	176	1804
C/G	0	0	0	0	0	28	30	20	5	5	1	3	92
AC/GT	0	33	13	6	2	2	3	2	0	0	1	3	65
AG/CT	0	23	14	10	3	2	3	3	0	1	2	17	78
AT/TA	0	70	23	14	7	5	0	2	1	1	0	0	123
CG/GC	0	1	1	0	0	0	0	0	0	0	0	0	2
AAC/GTT	228	73	26	14	3	4	2	0	1	1	0	0	352
AAG/CTT	42	7	5	1	1	1	0	0	0	0	0	0	57
AAT/ATT	25	9	5	1	1	0	1	0	0	1	1	1	45
ACC/GGT	22	7	1	1	0	0	0	0	0	0	0	0	31
ACG/CGT	5	0	1	0	0	0	0	0	0	0	0	0	6
ACT/AGT	3	1	1	1	0	0	0	0	0	0	0	0	6
AGC/CTG	50	19	8	5	2	2	1	0	0	0	0	0	87
AGG/CCT	24	11	4	0	0	0	0	0	0	0	0	0	39
ATC/ATG	143	47	31	26	2	2	1	0	1	0	2	7	262
CCG/CGG	2	0	0	0	0	0	0	0	0	0	0	0	2
AAAC/GTTT	5	0	1	2	0	0	0	0	0	0	0	0	8
AAAG/CTTT	0	0	1	2	1	0	0	0	0	0	0	0	4
AAAT/ATTT	3	0	0	0	0	0	0	0	0	0	0	0	3
AAGT/ACTT	1	2	0	0	0	0	0	0	0	0	0	0	3
AATC/ATTG	1	1	0	0	0	0	0	0	1	0	0	0	3
AATG/ATTC	0	4	0	0	0	0	0	0	0	1	0	0	5
ACAG/CTGT	3	4	0	0	0	0	0	0	0	0	0	0	7
ACAT/ATGT	2	0	0	0	0	0	0	0	0	0	0	0	2
ACCG/CGGT	0	2	0	0	0	0	0	0	0	0	0	0	2
ACGC/CGTG	2	1	0	0	0	0	0	0	0	0	0	0	3
ACGG/CCGT	8	2	1	0	0	1	0	0	0	0	0	0	12
ACTC/AGTG	1	0	0	0	0	0	0	0	0	0	0	0	1
AGGC/CCTG	1	0	0	0	0	0	0	0	0	0	0	0	1
AACAG/CTGTT	5	0	1	0	0	0	1	0	0	0	0	0	7
AACAT/ATGTT	1	0	0	0	0	0	0	0	0	0	0	0	1
AATAC/ATTGT	1	0	0	0	0	0	0	0	0	0	0	0	1
AATAG/ATTCT	0	0	1	0	0	0	0	0	0	0	0	0	1
AATAT/ATATT	0	0	0	0	0	1	0	0	0	0	0	0	1
ACAGT/ACTGT	0	0	1	0	0	0	0	0	0	0	0	0	1
Total	578	317	139	83	22	1172	347	144	60	26	22	207	3117
