# Supplementary material for: Transcriptome-wide identification and characterization of the Sox gene family and microsatellites for Corbicula fluminea
Source: PeerJ. 2019 Oct 22;7:e7770. doi: 10.7717/peerj.7770 (PMC6814067; doi:10.7717/peerj.7770)
Supplement: Table S7 [file peerj-07-7770-s007.xlsx]

## Sheet: Sheet1
Table S7. Information of primers designed for SSRs developed from the transcriptome of Corbicula fluminea.																Table S7. Information of primers designed for SSRs developed from the transcriptome of Corbicula fluminea.
Unigene ID	Forward Primer 1 (5'-3')	Tm (°C)	Size (bp)	Reverse Primer 1 (5'-3')	Tm (°C)	Size (bp)	Product Size (bp)	Start position	End position	Forward Primer 2 (5'-3')	Tm (°C)	Size (bp)	Reverse Primer 2 (5'-3')	Tm (°C)	Size (bp)	Product Size (bp)	Start position	End position	Forward Primer 3 (5'-3')	Tm (°C)	Size (bp)	Reverse Primer 3 (5'-3')	Tm (°C)	Size (bp)	Product Size (bp)	Start position	End position
TR32787_c0_g1	CCCCTTCATAAAGCAGTTCG	59.702	20	TCAACCAGGTTTTCTCCAAA	58.173	20	170	2571	2740	CCCCTTCATAAAGCAGTTCG	59.702	20	TCAACCAGGTTTTCTCCAAAAT	59.85	22	170	2571	2740	TCCACATGCTTCCAGTAGGA	59.241	20	TCAACCAGGTTTTCTCCAAA	58.173	20	265	2476	2740
TR25507_c50_g26	CCATGGTTACCCATTCTCCA	60.572	20	ATACAAGCAGGTGCGAAAGC	60.416	20	272	570	841	CCATGGTTACCCATTCTCCA	60.572	20	AAAAAGGCATGCTGTGTTCA	59.322	20	149	570	718	CCATGGTTACCCATTCTCCA	60.572	20	TACAAGCAGGTGCGAAAGC	60.15	19	271	570	840
TR47868_c1_g2	CACTGCTGCTTCCCCTTTAG	60.008	20	AATGCCAAAACCTCAGCAAC	60.118	20	277	374	650	GGCTTTAATGCAGGCTTCTG	59.982	20	AATGCCAAAACCTCAGCAAC	60.118	20	234	417	650	CAGGCTTTAATGCAGGCTTC	59.982	20	AATGCCAAAACCTCAGCAAC	60.118	20	236	415	650
TR32188_c0_g1	TGAGGTTACAGCTGCAAGGA	59.591	20	TCTGCTTCAAAGCCAGTTGA	59.716	20	157	96	252	TGAGGTTACAGCTGCAAGGA	59.591	20	CCAGTTGAAAGCAACATCCA	59.691	20	145	96	240	AGCTGCAAGGACTACTTGGG	59.496	20	TCTGCTTCAAAGCCAGTTGA	59.716	20	148	105	252
TR20708_c0_g1	ACAGGGATATGTCACCCCAA	60.05	20	ATATTCTGATGCTGGGGCAG	60.059	20	237	1	237	CAGGGATATGTCACCCCAAC	60.05	20	ATATTCTGATGCTGGGGCAG	60.059	20	236	2	237	AACAGGGATATGTCACCCCA	60.05	20	ATATTCTGATGCTGGGGCAG	60.059	20	238	0	237
TR19812_c0_g1	AAAGCTGTGTCGAACTCCCT	58.943	20	CACCAGCATGCACCAGAATA	60.687	20	277	313	589	GCTGTGTCGAACTCCCTAACA	60.306	21	CACCAGCATGCACCAGAATA	60.687	20	274	316	589	AAGCTGTGTCGAACTCCCTAA	58.994	21	CACCAGCATGCACCAGAATA	60.687	20	276	314	589
TR10568_c0_g1	CTCCTCTGCTACCTCGCACT	59.769	20	TTTGTAACACGGGTCGATGA	59.964	20	255	2226	2480	CTCCTCTGCTACCTCGCACT	59.769	20	CTGAGAATGGTAACGGGGAA	59.926	20	278	2226	2503	GATACGCCCTCTGTAGTCCG	59.717	20	TTTGTAACACGGGTCGATGA	59.964	20	157	2324	2480
TR26946_c1_g1	GCCAAGGCAAAAGAAACTGA	60.365	20	ACATCCCGCTCGTACAACTC	60.142	20	147	805	951	GCCAAGGCAAAAGAAACTGA	60.365	20	CATTATTCTCCCACATCCCG	60.148	20	159	805	963	GCCAAGGCAAAAGAAACTGA	60.365	20	CGCTCGTACAACTCCCCTAA	60.262	20	141	805	945
TR7479_c0_g1	TTTCATTTGCTGTGTCTCGG	59.84	20	CCAAATTATTGCCCCTACCA	59.655	20	121	1738	1858	CATTTGCTGTGTCTCGGAAA	59.84	20	CCAAATTATTGCCCCTACCA	59.655	20	118	1741	1858	TCATTTGCTGTGTCTCGGAA	60.39	20	CCAAATTATTGCCCCTACCA	59.655	20	119	1740	1858
TR20215_c0_g1	TGCATGGCCTTAAAGTTCCT	59.708	20	TGAGCATTGTGTGTTTCAGATG	59.764	22	151	1170	1320	TGCATGGCCTTAAAGTTCCT	59.708	20	GCATTGTGTGTTTCAGATGACC	60.428	22	148	1170	1317	ACATTCCTAATGCATGGCCT	59.415	20	TGAGCATTGTGTGTTTCAGATG	59.764	22	161	1160	1320
TR20215_c0_g1	CATCTGAAACACACAATGCTCA	59.764	22	AACATTCACCCTCGTATTATTTTAAC	58.094	26	181	1299	1479	CATCTGAAACACACAATGCTCA	59.764	22	CTAACATTCACCCTCGTATTATTTT	57.046	25	183	1299	1481	GGTCATCTGAAACACACAATGC	60.428	22	AACATTCACCCTCGTATTATTTTAAC	58.094	26	184	1296	1479
TR21714_c0_g1	TGTTTTGAGTTGTGTGCTGTGA	60.384	22	TGAGAAAAGACCCCTTGTGG	60.081	20	166	247	412	TGTTTTGAGTTGTGTGCTGTGA	60.384	22	CCTTGTGGGTGTCCAATCTT	59.82	20	154	247	400	TGTTTTGAGTTGTGTGCTGTG	58.377	21	TGAGAAAAGACCCCTTGTGG	60.081	20	166	247	412
TR51786_c3_g14	TCCAAGCTGCTTTTTGTGTG	60.027	20	CAGAAAACCGTACCGGACAT	59.853	20	242	1098	1339	AGCTGCTTTTTGTGTGGCTT	60.059	20	CAGAAAACCGTACCGGACAT	59.853	20	238	1102	1339	AAGCTGCTTTTTGTGTGGCT	60.059	20	CAGAAAACCGTACCGGACAT	59.853	20	239	1101	1339
TR24596_c0_g1	TCGTTTTCCTAGACTTTGACGA	59.017	22	GTTTGGACTCCTGGGACAAA	59.943	20	248	390	637	TCGTTTTCCTAGACTTTGACGA	59.017	22	TTTGGACTCCTGGGACAAAG	60.081	20	247	390	636	AAAAACTTGCATACACCTGGAAA	59.926	23	ATTGTTATGCCCGACAAAGC	59.967	20	227	330	556
TR14705_c0_g1	CAAAACTTGGCATGCTCATC	59.276	20	GAAAGACTTTTTGTTGCGGC	59.867	20	180	77	256	AGCATCAACAAAACTTGGCA	59.322	20	GTGATTGAGAAAGGGGCAGA	60.195	20	256	69	324	AGCATCAACAAAACTTGGCA	59.322	20	TGAGAAAGGGGCAGAGATGT	59.803	20	251	69	319
TR45723_c0_g2	GCTGGTGTTTGGGATGAAAT	59.797	20	TGCGACAGTGAAGGTCTGTT	59.467	20	277	172	448	GCTGGTGTTTGGGATGAAAT	59.797	20	TTGCGACAGTGAAGGTCTGT	59.467	20	278	172	449	AGTTTTTGCTGGTGTTTGGG	60.008	20	CATTCCGAGGACTGAAAATGA	60.059	21	263	165	427
TR45723_c0_g2	GCTGGTGTTTGGGATGAAAT	59.797	20	TGCGACAGTGAAGGTCTGTT	59.467	20	277	693	969	GCTGGTGTTTGGGATGAAAT	59.797	20	TTGCGACAGTGAAGGTCTGT	59.467	20	278	693	970	AGTTTTTGCTGGTGTTTGGG	60.008	20	CATTCCGAGGACTGAAAATGA	60.059	21	263	686	948
TR21352_c0_g1	TTGTGCTTTGTTGCATTGTT	57.821	20	ATACCGCAGATGTTTCCCAG	59.955	20	254	1740	1993	TTGTGCTTTGTTGCATTGTT	57.821	20	GGGAGAGTGAATACCGCAGA	60.218	20	264	1740	2003	AATTGTGCTTTGTTGCATTGTT	59.563	22	ATACCGCAGATGTTTCCCAG	59.955	20	256	1738	1993
TR21352_c0_g1	CTGGGAAACATCTGCGGTAT	59.955	20	GCCACATCACAGCCATTCTA	59.679	20	265	1974	2238	AGCCGATGAAGCTCTCACAT	59.981	20	AGGTCACGTCCTCAGTCTGC	60.467	20	144	2146	2289	TCTGCGGTATTCACTCTCCC	60.218	20	GCCACATCACAGCCATTCTA	59.679	20	255	1984	2238
TR41554_c4_g1	CAGTGCCATTTCATAGCACATT	60.025	22	TCACATTCATATTTAAAAACAACAACA	58.905	27	255	8	262	CAGTGCCATTTCATAGCACATT	60.025	22	CACATTCATATTTAAAAACAACAACAA	58.519	27	254	8	261	CAGTGCCATTTCATAGCACATT	60.025	22	CACATTCATATTTAAAAACAACAACA	57.343	26	254	8	261
TR38019_c0_g1	ACATGACTTCTGGGACAGGG	59.962	20	TTGGGTCAGAAATGACTTTGTC	59.077	22	280	441	720	CAGGGCACAGGACTTCTAGG	59.861	20	TTGGGTCAGAAATGACTTTGTC	59.077	22	265	456	720	ACATGACTTCTGGGACAGGG	59.962	20	TGAATCTGAACTACAACGGCTT	58.906	22	226	441	666
TR10367_c0_g1	GGGAAGAATTCCCATTTTGG	60.482	20	TTGAAGTGATTCCCTTTCGG	60.044	20	192	1276	1467	GGGAAGAATTCCCATTTTGG	60.482	20	TGAAGTGATTCCCTTTCGGA	60.572	20	191	1276	1466	GGGAAGAATTCCCATTTTGG	60.482	20	AAGTGATTCCCTTTCGGAGC	60.578	20	189	1276	1464
TR26690_c4_g2	GTAGACCCGAGGAGGTGACA	60.112	20	GTCACCGTCATGGTTCACTG	60.005	20	248	2622	2869	GTAGACCCGAGGAGGTGACA	60.112	20	GTCCTTCCTCATCCACCTCA	60.048	20	201	2622	2822	TCACTGGTCTTAAAAGGGCG	60.241	20	TGTCACCGTCATGGTTCACT	60.005	20	189	2682	2870
TR55860_c0_g1	GATGGGAGGCTTGTTTGAGA	60.195	20	ACCTCCCAGGTAGCCTGATT	59.957	20	205	376	580	GATGGGAGGCTTGTTTGAGA	60.195	20	AACCTCCCAGGTAGCCTGAT	59.957	20	206	376	581	GATGGGAGGCTTGTTTGAGA	60.195	20	TTCCTCGTCATCAACCATCA	60.048	20	129	376	504
TR10689_c1_g1	CCCATACCTTGGCTTTCTCA	60.066	20	CGGTGGAATCTGGTGATTTT	59.79	20	204	919	1122	AGCAGCGGATCCTCTTACAA	59.978	20	AGTGCCTCTAAAAGGAGGGG	59.707	20	268	803	1070	CGTGCACTCCCTAATTCCAT	59.955	20	AGTGCCTCTAAAAGGAGGGG	59.707	20	234	837	1070
TR33465_c0_g1	TCAGCCAGTAACAACTTCAACA	58.484	22	GTTGGGAGAGGTTGGTTTGA	59.943	20	248	797	1044	TCAGCCAGTAACAACTTCAACAG	59.475	23	GTTGGGAGAGGTTGGTTTGA	59.943	20	248	797	1044	TCAGCCAGTAACAACTTCAACAG	59.475	23	GCGATTGGAATTTGGATTGT	59.768	20	266	797	1062
TR33430_c0_g1	TAACTTGGTGACCCCTCAGC	60.111	20	CCATGGTGACTGCTCAGAGA	59.98	20	266	160	425	GGTGACCCCTCAGCAGATTA	60.073	20	GTTTCCCATGGTGACTGCTC	60.52	20	265	166	430	TAACTTGGTGACCCCTCAGC	60.111	20	GTTTCCCATGGTGACTGCTC	60.52	20	271	160	430
TR33430_c0_g1	TGGGTTTGTTTATCAAGGGC	59.801	20	CAACACCCACTTCAGCTTTG	59.335	20	191	1373	1563	TGGGTTTGTTTATCAAGGGC	59.801	20	CACAACACCCACTTCAGCTTT	60.2	21	193	1373	1565	TGGGTTTGTTTATCAAGGGC	59.801	20	ACAACACCCACTTCAGCTTTG	60.2	21	192	1373	1564
TR40257_c2_g1	CCTCAATTTTGGGTGCATCT	59.933	20	GCCATTCGAATATTTCCCAG	59.369	20	214	1102	1315	CCTCAATTTTGGGTGCATCT	59.933	20	AGCCATTCGAATATTTCCCA	59.369	20	215	1102	1316	ATTTTGGGTGCATCTTTTGG	59.801	20	GCCATTCGAATATTTCCCAG	59.369	20	209	1107	1315
TR2255_c1_g1	TTCTCCCATCCATCAAGCTC	60.158	20	TCCTTCAATGCTGTCACTGG	59.831	20	278	309	586	TTCTCCCATCCATCAAGCTC	60.158	20	CCTTCAATGCTGTCACTGGA	59.831	20	277	309	585	CGAAGTGATTCACCCACCTT	59.966	20	AAGACTCGCGTATCGTCACA	59.47	20	235	291	525
TR45839_c0_g1	GCAACGGCAATTAGAGAAGC	59.988	20	TGTCATTAACATCGGGCTCA	60.073	20	260	828	1087	CCGATGACGAGAACGAAAAT	60.074	20	TGTCATTAACATCGGGCTCA	60.073	20	141	947	1087	CAGCAGCAGTGAGACTGGAG	59.915	20	TGTCATTAACATCGGGCTCA	60.073	20	191	897	1087
TR10410_c2_g2	TATGACGACCCACCATGTGA	60.818	20	TCACTGTGCAGAATTCGACC	59.837	20	155	43	197	TATGACGACCCACCATGTGA	60.818	20	GGCCAGCATACATCCAAATC	60.304	20	275	43	317	TATGACGACCCACCATGTGA	60.818	20	AATCAAAATGCACAGATGCG	59.694	20	259	43	301
TR49712_c0_g1	AGCGTTGAATGTTTACCGTG	58.701	20	ACTCACCCCGACATTGTCAT	60.246	20	257	330	586	CAGCGTTGAATGTTTACCGT	58.701	20	ACTCACCCCGACATTGTCAT	60.246	20	258	329	586	GCGTTGAATGTTTACCGTGT	58.555	20	ACTCACCCCGACATTGTCAT	60.246	20	256	331	586
TR49712_c0_g1	AATGGGGAAGGGGTTTATGT	59.397	20	GTCGCACATGCGTAAAAATG	60.14	20	248	893	1140	CATCCCCAAAAGTTGATGGA	60.692	20	GTCGCACATGCGTAAAAATG	60.14	20	218	923	1140	TCCCCAAAAGTTGATGGATT	59.22	20	GTCGCACATGCGTAAAAATG	60.14	20	216	925	1140
TR39071_c0_g1	CCCGACAAGACAGTCCATTT	59.966	20	TTCAACCTTATCACCGTCCC	59.79	20	217	347	563	CCCGACAAGACAGTCCATTT	59.966	20	TCTCATTTGCCACCTTTCCT	59.67	20	156	347	502	CCCGACAAGACAGTCCATTT	59.966	20	CTCTCATTTGCCACCTTTCC	59.67	20	157	347	503
TR10368_c0_g1	CCATAATTTCCTAATTCTGGTGC	58.936	23	CCAAAAGACACAGGATTCGC	60.636	20	199	441	639	CCTAATTCTGGTGCTAACACTTCA	59.723	24	CCAAAAGACACAGGATTCGC	60.636	20	190	450	639	CCTAATTCTGGTGCTAACACTTCA	59.723	24	GCCAAAAGACACAGGATTCG	60.636	20	191	450	640
TR23281_c0_g1	TCAACCACCTTTATCCATGC	58.423	20	ACTGATGGGTGTCAAGGGAG	59.962	20	143	214	356	TCAACCACCTTTATCCATGC	58.423	20	GATGGGTGTCAAGGGAGAGA	60.048	20	140	214	353	TCAACCACCTTTATCCATGC	58.423	20	GGGTGTCAAGGGAGAGATGA	60.048	20	137	214	350
TR38230_c0_g1	ATTCTGCCCAAGCATGAAAA	60.585	20	GTTTTGCGGCAATCAAAGTT	60.117	20	140	177	316	AGCATGGAATTTAGGCGATG	60.06	20	TGCGGCAATCAAAGTTTTCT	60.752	20	279	34	312	ATTCTGCCCAAGCATGAAAA	60.585	20	GTACCGGGGCTAAGTACCGT	60.262	20	221	177	397
TR12906_c0_g1	GCTTATCCGTCGTGATGCTT	60.243	20	CGGCTAGGAAAAAGGAATGA	59.292	20	273	4475	4747	GGAATCCCCAGATCAACAAA	59.727	20	CGGCTAGGAAAAAGGAATGA	59.292	20	203	4545	4747	TATCCGTCGTGATGCTTTTG	59.688	20	CGGCTAGGAAAAAGGAATGA	59.292	20	270	4478	4747
TR29293_c7_g1	AGCTGATTCCGACTTTGCAT	59.843	20	GGCGGCTTTGAAAAACAGT	60.242	19	152	359	510	GCTGATTCCGACTTTGCATT	60.221	20	GGCGGCTTTGAAAAACAGT	60.242	19	151	360	510	GAGCTCAGCTGATTCCGACT	59.709	20	GGCGGCTTTGAAAAACAGT	60.242	19	158	353	510
TR46995_c0_g2	TTGATGCTTACGTCTGTCGG	59.864	20	GAAAGGGAGGTCACTTTTGCT	59.743	21	142	721	862	AGGACCAGCCTATGCTGAAA	59.836	20	GAAAGGGAGGTCACTTTTGCT	59.743	21	109	754	862	AGAAGACGCATTTCCGTGAC	60.263	20	GAAAGGGAGGTCACTTTTGCT	59.743	21	180	683	862
TR35346_c0_g7	TTACAAACTTCGCTACCGGG	60.124	20	TGGATGGACAGACAATGTGG	60.378	20	194	132	325	TTACAAACTTCGCTACCGGG	60.124	20	GATGGACAGACAATGTGGCTT	59.989	21	192	132	323	TTTCCGAACACAGCTTCTTG	59.047	20	TAGCGATCCAAATGTTGCAC	59.694	20	273	163	435
TR50162_c0_g1	CTAGGGACGGACATTCGTGT	59.989	20	CTCGTCAGGCATTTCTGTGA	59.984	20	272	1622	1893	GGTGATTCTAGGGACGGACA	59.927	20	CTCGTCAGGCATTTCTGTGA	59.984	20	279	1615	1893	GGGACGGACATTCGTGTACT	59.851	20	CTCGTCAGGCATTTCTGTGA	59.984	20	269	1625	1893
TR35007_c0_g1	AAACCAAGCTGAAAAACCGA	59.724	20	TTTTTCACGCATTGCCATAA	60.074	20	220	231	450	TTGAGCACACTTTTCGACCA	60.427	20	TTTTTCACGCATTGCCATAA	60.074	20	165	286	450	TGAGCACACTTTTCGACCAA	60.427	20	TTTTTCACGCATTGCCATAA	60.074	20	164	287	450
TR50269_c0_g1	GGCCCCACAATTATTAAAAGG	59.575	21	CTGCACATTTTTGCCATCTG	60.257	20	280	307	586	TGTTGGCCCCACAATTATTA	58.744	20	TTTGCCATCTGATCAAGGTCT	59.685	21	275	303	577	CTGTTGGCCCCACAATTATTA	59.707	21	TTTGCCATCTGATCAAGGTCT	59.685	21	276	302	577
TR57041_c0_g1	ACATTCCCAACCTTTTCCTG	58.884	20	TTTGCCAAAATGATTGGCTT	60.436	20	183	525	707	AACATTCCCAACCTTTTCCTG	60.207	21	TTTGCCAAAATGATTGGCTT	60.436	20	184	524	707	ACATTCCCAACCTTTTCCTG	58.884	20	TTGCCAAAATGATTGGCTTA	59.146	20	182	525	706
TR25885_c0_g2	GCACCCTTAACTCTTGGTGG	59.592	20	GGGGGATAAAAAGGAAGCAA	60.252	20	199	2324	2522	ACCCTTAACTCTTGGTGGCA	59.592	20	GGGGGATAAAAAGGAAGCAA	60.252	20	197	2326	2522	CACCCTTAACTCTTGGTGGC	59.592	20	GGGGGATAAAAAGGAAGCAA	60.252	20	198	2325	2522
TR44660_c1_g2	TGAATCAAGGTTCCCTCCTG	60.042	20	TATCTGCTGGTGCTCCTCCT	59.973	20	146	583	728	GGGCTGGACTGGTATCTTGA	60.073	20	TATCTGCTGGTGCTCCTCCT	59.973	20	163	566	728	TCCAGAATACCTCCACGACC	59.927	20	TATCTGCTGGTGCTCCTCCT	59.973	20	238	491	728
TR52322_c0_g1	CCGGTCAGATGCTTGAGATT	60.218	20	GGATACATTTAATCCCGCCA	59.621	20	231	53	283	CCGGTCAGATGCTTGAGATT	60.218	20	TGGATACATTTAATCCCGCC	59.621	20	232	53	284	TGGTTTCCATGCTCAGCTTT	60.776	20	GGATACATTTAATCCCGCCA	59.621	20	205	79	283
TR41556_c3_g3	GCCCGGTTTGAATAATGAAT	58.763	20	TGTGTTCGATGAACTCCTGTT	58.201	21	277	720	996	GCCCGGTTTGAATAATGAAT	58.763	20	ATGTGTTCGATGAACTCCTGTT	58.577	22	278	720	997	TGATAAGGAGTTCTGCAAACAAA	58.932	23	CGGTATCCCATGTGTTCGAT	60.603	20	211	796	1006
TR41556_c3_g3	CAGATGATGTGTCTGATAACCCA	59.867	23	GCATGTTCCTTGTTCCCTGT	59.973	20	250	1151	1400	CAGATGATGTGTCTGATAACCCA	59.867	23	AGCATGTTCCTTGTTCCCTG	60.111	20	251	1151	1401	TCAGATGATGTGTCTGATAACCC	58.925	23	GCATGTTCCTTGTTCCCTGT	59.973	20	251	1150	1400
TR55105_c1_g2	AGAAGGAAAAGCGGGAGAAG	59.955	20	ATTGCCTGATTTGGCTTGAC	60.081	20	279	1358	1636	AAGGTACCGATCACAAAGCG	60.132	20	ATTGCCTGATTTGGCTTGAC	60.081	20	164	1473	1636	AAAGCGGGAGAAGATAAGGC	59.82	20	ATTGCCTGATTTGGCTTGAC	60.081	20	272	1365	1636
TR2545_c0_g1	CGAGCGAATTTTTCTGGAAC	59.823	20	TTAAGTGCGCGTGTAAGCAC	60.081	20	127	474	600	CAGAACACCAGGATATCGGC	60.483	20	TTAAGTGCGCGTGTAAGCAC	60.081	20	149	452	600	GAACACCAGGATATCGGCTC	59.513	20	TTAAGTGCGCGTGTAAGCAC	60.081	20	147	454	600
TR10621_c5_g2	GAACAATCAACCACGAGATCAA	59.978	22	CGCTAGTTTTCCCCAAAGTT	58.377	20	239	1282	1520	CATTTTGTCCGAACCAATTTTT	60.089	22	CGCTAGTTTTCCCCAAAGTT	58.377	20	187	1334	1520	TGCAAATTAAACATTTTGTCCG	59.876	22	CGCTAGTTTTCCCCAAAGTT	58.377	20	198	1323	1520
TR39799_c0_g1	GGCATAACAGACTCATTGCCA	61.047	21	CATTTAAGTTTCCAGGCCGA	60.067	20	194	1292	1485	CTTTTTCACATCAAAATGGCA	58.663	21	CATTTAAGTTTCCAGGCCGA	60.067	20	211	1275	1485	TTTTTCACATCAAAATGGCA	57.606	20	CATTTAAGTTTCCAGGCCGA	60.067	20	210	1276	1485
TR26837_c0_g1	GCTGTGGCTTCAGCAGTACC	61.007	20	TGCTGAGAGAACAGTTTGCG	60.324	20	275	2323	2597	AAATAGCTGTGGCTTCAGCAG	59.668	21	TGCTGAGAGAACAGTTTGCG	60.324	20	280	2318	2597	AATAGCTGTGGCTTCAGCAG	58.283	20	TGCTGAGAGAACAGTTTGCG	60.324	20	279	2319	2597
TR37078_c0_g1	ACATGGGCTGTCAGTGTTGA	60.162	20	TTGCCTTTTGATTTATTTGGG	58.967	21	124	1552	1675	ACATGGGCTGTCAGTGTTGA	60.162	20	TTTGCCTTTTGATTTATTTGGG	60.172	22	125	1552	1676	CATGGATACATGGGCTGTCA	60.353	20	TTGCCTTTTGATTTATTTGGG	58.967	21	131	1545	1675
TR35281_c0_g1	TTTCCCTTGATGAACTTGGC	60.051	20	CCTATTCGTGGCCTCAAGTC	59.694	20	233	4275	4507	CGTCACGTTTTTCTTCCTCC	59.711	20	GGGACAACAGCTCAGGATGT	60.12	20	170	4438	4607	TGAAGCGCTCACCAATATCA	60.366	20	GGGACAACAGCTCAGGATGT	60.12	20	227	4381	4607
TR24714_c0_g1	TGTGGTAGTCTTTTGTGCGG	59.758	20	TCAGGCTGATAACCTCACCC	60.073	20	105	514	618	TCGGCTGTGTGTGTGGTAGT	60.227	20	ACGCTCAGGCTGATAACCTC	59.459	20	120	503	622	CGGCTGTGTGTGTGGTAGTC	60.227	20	ACGCTCAGGCTGATAACCTC	59.459	20	119	504	622
TR24714_c0_g1	TTCCTTTGGTTTTACGGCCT	60.821	20	CGTGTTCATTACACCACAAAGG	60.318	22	202	1446	1647	TCCTTTGGTTTTACGGCCT	59.555	19	CGTGTTCATTACACCACAAAGG	60.318	22	201	1447	1647	CCTTTGGTTTTACGGCCTG	60.478	19	CGTGTTCATTACACCACAAAGG	60.318	22	200	1448	1647
TR24714_c0_g1	TCAGAAGAAGCTGTGAAGCAA	58.937	21	TTCTAACATCAAAGCCACCTCA	59.747	22	150	4273	4422	TCAGAAGAAGCTGTGAAGCAAA	60.305	22	TTCTAACATCAAAGCCACCTCA	59.747	22	150	4273	4422	TCAGAAGAAGCTGTGAAGCAA	58.937	21	TCTAACATCAAAGCCACCTCA	58.365	21	149	4273	4421
TR8181_c0_g1	TCATTTGCCTCATGGATTGA	60.009	20	TCAGGAGCGAGACTACGACA	59.726	20	231	964	1194	ACTGTTGCCATGGTGATGAA	59.967	20	TCAGGAGCGAGACTACGACA	59.726	20	153	1042	1194	ACTGTTGCCATGGTGATGAA	59.967	20	GGGAGTGTGGTGACATCCTC	60.383	20	265	1042	1306
TR20743_c0_g4	TTTTGTCCAGCCACTTCTGA	59.415	20	TCAAAACAAAGGTGTGGCAG	59.734	20	240	220	459	TTTTGTCCAGCCACTTCTGA	59.415	20	CAAAACAAAGGTGTGGCAGA	59.734	20	239	220	458	TTTTGTCCAGCCACTTCTGA	59.415	20	AAACAAAGGTGTGGCAGAGC	60.299	20	237	220	456
TR10529_c1_g1	CAGGAATTGCAACATTCAGAAG	59.747	22	GTAGTGCAAACTGCCCATCA	59.722	20	212	34	245	CAGGAATTGCAACATTCAGAAG	59.747	22	CTTGTTCGAATTTTGTGGCA	59.706	20	182	34	215	CAACATTCAGAAGTCAAAGCCA	60.284	22	GTAGTGCAAACTGCCCATCA	59.722	20	203	43	245
TR17315_c4_g1	CGAAGTGCGACATCTCTGAA	60.136	20	TCCCTTGGCCTATTGACTTG	60.066	20	221	293	513	CGAAGTGCGACATCTCTGAA	60.136	20	ATAAATCGTTGGCCTCCCTT	59.799	20	235	293	527	CGAAGTGCGACATCTCTGAA	60.136	20	CCATGATAAATCGTTGGCCT	59.784	20	240	293	532
TR38167_c0_g1	TTGCAAATGGATTAAACCCC	59.638	20	TGCGAGATAAGCACAACACA	59.021	20	219	171	389	TTGCAAATGGATTAAACCCC	59.638	20	TGCGAGATAAGCACAACACAC	59.927	21	219	171	389	TTGCAAATGGATTAAACCCC	59.638	20	CGTATGTCTGTGTTTGCGAGA	59.92	21	233	171	403
TR39237_c0_g1	CCCTTCTTCCTCTTGAGTCACA	60.787	22	TTTTCTTTCGTTTGCACATCA	59.335	21	269	200	468	CACCCTTCTTCCTCTTGAGTC	57.969	21	TTTTCTTTCGTTTGCACATCA	59.335	21	271	198	468	CCCTTCTTCCTCTTGAGTCAC	57.969	21	TTTTCTTTCGTTTGCACATCA	59.335	21	269	200	468
TR27763_c0_g1	GGATAGAGTGAGAGAGAGAAAAAGAGA	59.302	27	TTTACCCGTGTTTCGAGAATG	59.982	21	251	9	259	GGATAGAGTGAGAGAGAGAAAAAGAGA	59.302	27	CCGTGTTTCGAGAATGGAGA	61.176	20	246	9	254	GGATAGAGTGAGAGAGAGAAAAAGAGA	59.302	27	TGTTTCGAGAATGGAGATGG	58.643	20	243	9	251
TR11118_c1_g1	TCCTCCTGGAGTGCCATTAC	60.073	20	AAAGAATGTCGCAGACAGGG	60.255	20	117	1474	1590	TCCTCCTGGAGTGCCATTAC	60.073	20	AAGAATGTCGCAGACAGGGT	59.727	20	116	1474	1589	AAATGATGCCAATTAGCCGA	60.424	20	AAAGAATGTCGCAGACAGGG	60.255	20	276	1315	1590
TR50055_c0_g2	GAAACTTGTGACTGATGCCG	59.293	20	GTCATTTGGGCAACCTGTCT	59.973	20	170	237	406	GAAACTTGTGACTGATGCCG	59.293	20	TCCCATTCCATTTGTTTGGT	60.029	20	236	237	472	GAAACTTGTGACTGATGCCG	59.293	20	CATTTGGGCAACCTGTCTCT	60.111	20	168	237	404
TR36456_c0_g1	CGGTCAAAATGTGCCAAAA	60.486	19	ACGACAACCACTTTTTCGGT	59.496	20	187	90	276	TACCTTCCGGTCAAAATGTG	58.475	20	ACGACAACCACTTTTTCGGT	59.496	20	194	83	276	CGGTCAAAATGTGCCAAAA	60.486	19	TCCTTCCTTTTCAGCTTCGT	59.052	20	278	90	367
TR25139_c0_g1	CAGCAATTCAGGATTTCCAA	58.695	20	CAGAACGAGCCATTCGTGTA	59.864	20	225	278	502	CAATTCAGGATTTCCAACTGC	59.56	21	ACGATATCTTGCGACGATCC	60.066	20	156	281	436	GCAATTCAGGATTTCCAACTG	59.56	21	ACGATATCTTGCGACGATCC	60.066	20	157	280	436
TR32156_c1_g1	ATGGCAAATCTGACGAAAGC	60.221	20	TCCAGTTGCGCTTGTGATAG	60.011	20	215	1715	1929	ATGGCAAATCTGACGAAAGC	60.221	20	TCTTCAGTGTTCCAGTTGCG	60.025	20	225	1715	1939	ATGGCAAATCTGACGAAAGC	60.221	20	TTCCAGTTGCGCTTGTGATA	60.401	20	216	1715	1930
TR56879_c0_g1	GAAGTGCGCGAAAGAAAAAC	60.003	20	TCTTTCGCTTGAGTGAGTTTACA	59.21	23	209	1433	1641	GGCCAGTTGAACCTCAAAAG	59.711	20	TTTCTTTCGCTTGAGTGAGTTT	58.314	22	280	1364	1643	GTGTTCAGCAACGTTTGACG	60.347	20	TTTCTTTCGCTTGAGTGAGTTT	58.314	22	261	1383	1643
TR20758_c0_g1	CTTCCCGTCATATGGTAGCC	59.41	20	CGGTAACAGCCATATCCCAC	60.214	20	261	628	888	CCTTCCCGTCATATGGTAGC	59.41	20	CGGTAACAGCCATATCCCAC	60.214	20	262	627	888	CTTCCCGTCATATGGTAGCC	59.41	20	TTAGCCTGTCGGTAACAGCC	60.27	20	270	628	897
TR20758_c0_g1	CCATCCCCAAATACAGCAAA	60.692	20	TTGGTTTGTCAAAGAAAACCCT	59.886	22	216	1831	2046	GCACATTCTCACGCAAACTT	58.929	20	TTGGTTTGTCAAAGAAAACCCT	59.886	22	251	1796	2046	AATCTTCGCACATTCTCACG	58.877	20	TTGGTTTGTCAAAGAAAACCCT	59.886	22	258	1789	2046
TR26642_c0_g1	TATTTGCAGGTTGAGGAGGC	60.214	20	TGAATGTCACGAATAGCCACA	60.127	21	227	488	714	TTTTTGCTTTGCCGGTATTC	60.075	20	GGAATAGCCACAGTATTGCACA	60.025	22	276	342	617	TATTTGCAGGTTGAGGAGGC	60.214	20	GGAATAGCCACAGTATTGCACA	60.025	22	130	488	617
TR26642_c0_g1	GGGAATGTATCAACACGCCT	59.82	20	AGCCTACCCACAGAGCAGAA	60.012	20	241	1277	1517	GGGAATGTATCAACACGCCT	59.82	20	ATGACTACCGCGAATCAAGG	60.096	20	149	1277	1425	GGGAATGTATCAACACGCCT	59.82	20	GACTACCGCGAATCAAGGTC	59.7	20	147	1277	1423
TR51749_c2_g1	AAGTTCTTGGGTTCTGGCCT	60.11	20	TGAGTTACACAGGAGCACGG	59.897	20	277	1306	1582	TCCATCCTGGTCAGGCTTAG	60.21	20	GATGCTGTAGAGAAAGCCCG	59.978	20	245	1400	1644	TCCATCCTGGTCAGGCTTAG	60.21	20	TGAGTTACACAGGAGCACGG	59.897	20	183	1400	1582
TR41596_c0_g1	CTTCCAAAAGAAAAAGCCCC	60.048	20	CCTGGGAAAACAGAGACCAA	60.081	20	243	419	661	GCGTGGTTCCCAGAGAGATA	60.218	20	CCAAAGGCCAAATTCAAAGA	60.046	20	256	466	721	CTTCCAAAAGAAAAAGCCCC	60.048	20	TGGGAAAACAGAGACCAAGC	60.232	20	241	419	659
TR41596_c0_g1	CTTCCAAAAGAAAAAGCCCC	60.048	20	CCTGGGAAAACAGAGACCAA	60.081	20	243	1631	1873	GCGTGGTTCCCAGAGAGATA	60.218	20	CCAAAGGCCAAATTCAAAGA	60.046	20	256	1678	1933	CTTCCAAAAGAAAAAGCCCC	60.048	20	TGGGAAAACAGAGACCAAGC	60.232	20	241	1631	1871
TR54141_c0_g1	TACCCATGAACTTATGCCCG	60.712	20	TAAACACCTTTACGGCCTGG	59.99	20	132	39	170	TACCCATGAACTTATGCCCG	60.712	20	GGCGACCAATGTAGATCCAG	60.483	20	113	39	151	TACCCATGAACTTATGCCCG	60.712	20	AAACACCTTTACGGCCTGG	59.978	19	131	39	169
TR39478_c0_g1	TGGAAAGCTGATAGGGGAAG	59.264	20	ATTCGGGATCCGTTGTCAT	60.15	19	183	1790	1972	GCTGATAGGGGAAGTCCTGA	59.239	20	ATTCGGGATCCGTTGTCAT	60.15	19	177	1796	1972	TGGAAAGCTGATAGGGGAAG	59.264	20	GAATTCGGGATCCGTTGTC	60.274	19	185	1790	1974
TR42014_c0_g1	GGATAGGAACAATTGCACTTCA	59.091	22	CGACAATTGGGTAGGAGACC	59.405	20	233	45	277	TCATTGATGGGATAGGAACAA	57.873	21	CGACAATTGGGTAGGAGACC	59.405	20	242	36	277	AATCATTGATGGGATAGGAACAA	59.563	23	CGACAATTGGGTAGGAGACC	59.405	20	244	34	277
TR50714_c0_g1	CCCAAATTATGAAATCGGAAAA	60.018	22	GGCGAAAAGTAGCAACACAA	58.967	20	265	1026	1290	CCCAAATTATGAAATCGGAAAA	60.018	22	AGGCGAAAAGTAGCAACACAA	59.934	21	266	1026	1291	CCCAAATTATGAAATCGGAAAA	60.018	22	AAGGCGAAAAGTAGCAACACA	59.934	21	267	1026	1292
TR6973_c0_g1	GGGTTTTGACCTTGCACAAT	59.836	20	TCCATGGGTAACCAACGTCT	60.232	20	194	2193	2386	GGCTCCAGTGTTGTGTTGAA	59.726	20	TCCATGGGTAACCAACGTCT	60.232	20	231	2156	2386	GGGTTTTGACCTTGCACAAT	59.836	20	GGGTAACCAACGTCTGCATC	60.384	20	189	2193	2381
TR55362_c0_g1	AATTGCGTAATTTTTGCACAC	57.782	21	CACATCACAACCATTCCCCT	60.634	20	208	1196	1403	AATTGCGTAATTTTTGCACACT	58.746	22	CACATCACAACCATTCCCCT	60.634	20	208	1196	1403	AATTGCGTAATTTTTGCACAC	57.782	21	TTCACATCACAACCATTCCC	59.193	20	210	1196	1405
TR42349_c1_g1	AGGGCAATCACAGAAAAAGG	59.17	20	ACAGGACGCATCACGAAAA	60.256	19	256	263	518	GGGCAATCACAGAAAAAGGT	59.031	20	ACAGGACGCATCACGAAAA	60.256	19	255	264	518	AGGGCAATCACAGAAAAAGG	59.17	20	AGACAGGACGCATCACGAA	60.419	19	258	263	520
TR41090_c0_g1	TGCAGATTTGTCGATATGGG	59.499	20	TGCAACCAATGAAGAAAGCA	60.379	20	268	322	589	TTGGTTGTAGCCACTCTGGA	59.288	20	CCCCCGTGTTCGTAAATAGA	59.817	20	230	412	641	TTGGTTGTAGCCACTCTGGA	59.288	20	TGCAACCAATGAAGAAAGCA	60.379	20	178	412	589
TR55433_c18_g3	TGTCCAGAATGAACCCCTTT	59.381	20	ATGTGACCCCCACAGGAATA	60.05	20	269	629	897	GCAAACAGTGGGGGATACAA	60.755	20	ATGTGACCCCCACAGGAATA	60.05	20	101	797	897	TTGCAAACAGTGGGGGATAC	60.755	20	ATGTGACCCCCACAGGAATA	60.05	20	103	795	897
TR21613_c0_g1	ACTGGTCCCGCTTGTGATAA	60.517	20	TGTGCATTTCAACATTTTTGAGT	59.549	23	277	42	318	ATCTACACTGGTCCCGCTTG	60.134	20	GGCATTAAATCATGAGTTTGTCA	59.002	23	124	36	159	ATCTACACTGGTCCCGCTTG	60.134	20	GGCATTAAATCATGAGTTTGTCAG	59.904	24	124	36	159
TR21613_c0_g1	AGCTTTGTTGCTGCAAATGA	59.614	20	TCGGTGGAAAATCCTAGCTG	60.206	20	214	862	1075	AGCTTTGTTGCTGCAAATGA	59.614	20	CGGTGGAAAATCCTAGCTGT	59.195	20	213	862	1074	AGCTTTGTTGCTGCAAATGA	59.614	20	TTTCGGTGGAAAATCCTAGC	59.158	20	216	862	1077
TR10668_c4_g1	AGGTTTTATCTCGGGTGCAA	59.569	20	GCCACATAGTACAAATGAGCATC	58.668	23	168	255	422	TGGGACTGGTTTCCAGACTT	59.549	20	GCCACATAGTACAAATGAGCATC	58.668	23	208	215	422	GGACTGGTTTCCAGACTTGG	59.549	20	GCCACATAGTACAAATGAGCATC	58.668	23	206	217	422
TR17672_c0_g1	ACGGATCCAACACGCTAAAC	60	20	ACATGGCCATTATGTAAAACAA	57.033	22	120	1035	1154	TCATACGCAAGCACTCGTTC	60.019	20	ACATGGCCATTATGTAAAACAA	57.033	22	157	998	1154	GCCTGTCACACCTCTTAGGC	59.874	20	ACATGGCCATTATGTAAAACAA	57.033	22	190	965	1154
TR42267_c0_g1	GGCGGTGTAAATCCATTCAA	60.701	20	CCTGCGGATTATCGAAGGTA	60.053	20	275	901	1175	GTCTGGTGAGCCCTGACTTC	59.841	20	TCATCACCAGCATCATCAGC	60.818	20	247	816	1062	GATTCAGGCTCTGTACCGGA	60.218	20	TCATCACCAGCATCATCAGC	60.818	20	186	877	1062
TR9635_c0_g1	CAATCAAACTGAGCCTGCAA	59.988	20	CCTCTCCCACTGGTATTTCCT	59.447	21	126	44	169	CAATCAAACTGAGCCTGCAA	59.988	20	CCTCTCCCACTGGTATTTCC	58.446	20	126	44	169	CAATCAAACTGAGCCTGCAA	59.988	20	ACCTCTCCCACTGGTATTTCC	59.313	21	127	44	170
TR22486_c0_g1	CACGCATAGAGCACCTGATG	60.436	20	ATTTGCGTGAAAATTCGTCC	59.945	20	239	1065	1303	TAAGGTGCACGCATAGAGCA	60.566	20	ATTTGCGTGAAAATTCGTCC	59.945	20	246	1058	1303	CACGCATAGAGCACCTGATG	60.436	20	GACATGGAAACCCCTTGAAA	59.767	20	145	1065	1209
TR57371_c0_g1	CATCTCTGTCGCCATTCTCA	59.942	20	GAGGCGGAGTTGTTGATGAT	60.081	20	222	2036	2257	TCCTCTCCCAAGTCAGCACT	59.986	20	CACCACCAAGAAGAGTGCAA	59.873	20	261	2073	2333	GTCCTCTCCCAAGTCAGCAC	59.841	20	ACCCACCACCAAGAAGAGTG	60.002	20	265	2072	2336
TR49229_c0_g2	CGGTGAATCCATCGTGATTA	59.35	20	TTCAGGCATGTTTGCATGTT	60.119	20	197	528	724	CGGTGAATCCATCGTGATTA	59.35	20	TTAAAGAATCCGGTTGCTCG	60.202	20	264	528	791	CGGTGAATCCATCGTGATTA	59.35	20	CTTCAGGCATGTTTGCATGT	59.722	20	198	528	725
TR41326_c0_g1	ATCGGATGCTTGAGATTTGG	60.036	20	CCTGGACCCATGATCACTTT	59.779	20	241	24	264	GGGACTGGTTTCCAATCTCA	59.903	20	CCTGGACCCATGATCACTTT	59.779	20	223	42	264	ATCGGATGCTTGAGATTTGG	60.036	20	TCCTGGACCCATGATCACTT	60.326	20	242	24	265
TR44802_c1_g1	AAAAGGGTCCTGTTTCAAGGA	59.963	21	GATATCTACCGTGCGTGCCT	60.125	20	185	994	1178	AAAAGGGTCCTGTTTCAAGGA	59.963	21	ATCTACCGTGCGTGCCTACT	59.786	20	182	994	1175	AAAAGGGTCCTGTTTCAAGGA	59.963	21	GTGGCGTGCCTCATTAGTCT	60.285	20	255	994	1248
TR45298_c0_g1	TCCTATGTTCTTGTGCCACG	59.716	20	TCAACAATGGGCTATCCCTC	59.894	20	165	2498	2662	TCCTATGTTCTTGTGCCACG	59.716	20	CATTCCTCCTTGCACTGGTT	60.111	20	146	2498	2643	TCCTATGTTCTTGTGCCACG	59.716	20	AATGGGCTATCCCTCATTCC	60.117	20	160	2498	2657
TR44258_c0_g2	AGGTCGGGCTCAAAAAGACT	60.247	20	AATTATAGAAGACGGGCCTGA	57.848	21	218	2205	2422	GGTCCCGATATGCACTTGTC	60.348	20	AATTATAGAAGACGGGCCTGA	57.848	21	115	2308	2422	ATCCCCACAGGTGAGACAAA	60.363	20	AATTATAGAAGACGGGCCTGA	57.848	21	171	2252	2422
TR35261_c0_g1	GATGGAGATCCTGTTGCCAT	59.893	20	TGTTTTCCTCTCGGCTGATT	59.813	20	270	1234	1503	GATGGAGATCCTGTTGCCAT	59.893	20	TTGTTTTCCTCTCGGCTGAT	59.813	20	271	1234	1504	GATGGAGATCCTGTTGCCAT	59.893	20	ATGCCTTTGTGGAAGCATCT	59.7	20	247	1234	1480
TR19930_c0_g1	CAAGCACTGCTGGTGAACAT	59.905	20	TGCCAGACTGGTTTGAAATG	59.691	20	187	559	745	TGAAGCAAAAACAAGGCACA	60.415	20	CTGGGGGCATTGTCTAGTGT	59.989	20	239	620	858	TGAAGCAAAAACAAGGCACA	60.415	20	ACTGGGGGCATTGTCTAGTG	59.989	20	240	620	859
TR23797_c1_g1	CATCCCACAATGCTCAACAG	60.112	20	CAGGGGATGAAGGATTTTGA	59.864	20	251	569	819	ACATCCCACAATGCTCAACA	59.967	20	GGTGGGAATGCTTTCATTTG	60.309	20	111	568	678	ACATCCCACAATGCTCAACA	59.967	20	TGGTGGGAATGCTTTCATTT	60.309	20	112	568	679
TR53694_c0_g1	AAAATCAATGCTGGGCAGAC	60.081	20	TCCTGTCGAGAACATTTGCTT	59.867	21	199	741	939	TCAATGCTGGGCAGACAATA	60.22	20	TCCTGTCGAGAACATTTGCTT	59.867	21	195	745	939	AAAATCAATGCTGGGCAGAC	60.081	20	CCTGTCGAGAACATTTGCTTT	59.369	21	198	741	938
TR7320_c2_g1	TATGGAGCTGTTTTAGGGGC	59.182	20	GGACATGCAATAAAAGGATGC	59.429	21	244	1931	2174	GGAGCTGTTTTAGGGGCATA	59.182	20	GGACATGCAATAAAAGGATGC	59.429	21	241	1934	2174	GTATGGAGCTGTTTTAGGGGC	59.979	21	GGACATGCAATAAAAGGATGC	59.429	21	245	1930	2174
TR47536_c0_g1	TGACAGGAAGTTAGAATGGCTG	59.378	22	GGCTTGCAATACCAAATGCT	60.103	20	221	20	240	CAGGAAGTTAGAATGGCTGTCA	59.378	22	GGCTTGCAATACCAAATGCT	60.103	20	218	23	240	CAGGAAGTTAGAATGGCTGTCA	59.378	22	AGGCTTGCAATACCAAATGC	60.103	20	219	23	241
TR44304_c0_g1	CATCGAAAAGTCATATTGGCA	58.639	21	GTGAAGTGGCTGGATGGAGT	60.12	20	247	159	405	ACATCGAAAAGTCATATTGGCA	59.479	22	GTGAAGTGGCTGGATGGAGT	60.12	20	248	158	405	CATCGAAAAGTCATATTGGCA	58.639	21	ATTTTGGTGAAGTGGCTGGA	60.495	20	253	159	411
TR44304_c0_g1	AATGATGCTGATGCTGATGC	59.794	20	ACTGTCGCTCTGGAAACGAT	59.874	20	233	595	827	ACTCCATCCAGCCACTTCAC	60.12	20	GACAGTTTAACGTCCCCTGC	59.598	20	277	386	662	AATGATGCTGATGCTGATGC	59.794	20	ACGACTGTCGCTCTGGAAAC	60.453	20	236	595	830
TR50768_c0_g1	ACGGACAAGGAACAGACAGC	60.307	20	CCGGGTAGTTGGATAGGGAT	60.032	20	215	1541	1755	GCATGGGCAACCAGAATAAC	60.339	20	CCGGGTAGTTGGATAGGGAT	60.032	20	197	1559	1755	AGCATGGGCAACCAGAATAA	60.469	20	CCGGGTAGTTGGATAGGGAT	60.032	20	198	1558	1755
TR25848_c3_g3	GCTGAGTTCTGGGAATTTGTG	59.726	21	TTCGAGCTTTGTCGGAGAAT	59.955	20	228	840	1067	GCTGAGTTCTGGGAATTTGTG	59.726	21	TTTAACCACTCGGGTCCTCA	60.486	20	269	840	1108	GCTGAGTTCTGGGAATTTGTG	59.726	21	TAACCACTCGGGTCCTCATT	59.405	20	267	840	1106
TR35255_c1_g1	CCAAATGGTTCTTTGATGGC	60.309	20	TCTTGTCTTGGGGCTCTGTT	59.844	20	238	411	648	CCAAATGGTTCTTTGATGGC	60.309	20	TTCTTGTCTTGGGGCTCTGT	59.844	20	239	411	649	CCAAATGGTTCTTTGATGGC	60.309	20	TCTTGGGGCTCTGTTGAATC	60.195	20	233	411	643
TR21814_c0_g1	TTGCCGAATAAATGGGGTTA	60.144	20	CCGAAAGTAGTCCCGAACAA	60.103	20	160	1669	1828	ACGTTTTGCCGAATAAATGG	59.832	20	CCGAAAGTAGTCCCGAACAA	60.103	20	165	1664	1828	TTGCCGAATAAATGGGGTTA	60.144	20	ATAAATTCGTTTAGGGCGGG	60.161	20	116	1669	1784
TR21839_c0_g1	TATACCCCTTGGGTCGTGAG	59.807	20	CTGGTTGCATCTTGGTCAGA	59.831	20	133	1102	1234	TATACCCCTTGGGTCGTGAG	59.807	20	TGGTTGCATCTTGGTCAGAA	60.24	20	132	1102	1233	ACGCGTACAAACCAACACTG	59.682	20	CTGGTTGCATCTTGGTCAGA	59.831	20	175	1060	1234
TR39458_c0_g1	TAAACAATCCAAGGGCAAGG	59.931	20	CTTTGCCTTCTTCGGTTTTG	59.855	20	241	328	568	GCTTAAACAATCCAAGGGCA	60.074	20	GCCTTCTTTGGTGACTTTGC	59.859	20	258	325	582	TGCTTAAACAATCCAAGGGC	60.074	20	GCCTTCTTTGGTGACTTTGC	59.859	20	259	324	582
TR25507_c50_g24	CCATGGTTACCCATTCTCCA	60.572	20	ATACAAGCAGGTGCGAAAGC	60.416	20	272	507	778	CCATGGTTACCCATTCTCCA	60.572	20	AAAAAGGCATGCTGTGTTCA	59.322	20	149	507	655	CCATGGTTACCCATTCTCCA	60.572	20	TACAAGCAGGTGCGAAAGC	60.15	19	271	507	777
TR29351_c0_g1	AGGGCCATCAGCTTAAAAAT	57.835	20	TTTTACTGGCGTGTGGAAAC	58.675	20	245	2	246	AGGGCCATCAGCTTAAAAAT	57.835	20	TTTTACTGGCGTGTGGAAACT	59.663	21	245	2	246	TAGGGCCATCAGCTTAAAAA	57.548	20	TTTTACTGGCGTGTGGAAAC	58.675	20	246	1	246
TR421_c1_g1	TGCTGCCTTTGAAACTGTTG	60.027	20	TGGTTCCATGATGTCCAGTG	60.378	20	132	1683	1814	AAGTTGTTGCTGCTGCCTTT	60.059	20	TGGTTCCATGATGTCCAGTG	60.378	20	142	1673	1814	AGCATCCAGGTCCATCTGTC	60.08	20	TGGTTCCATGATGTCCAGTG	60.378	20	268	1547	1814
TR10585_c1_g1	TTTCTCTTTCTGGGTGGTGG	60.081	20	TCTGCCAAGATGTGATCTGC	59.95	20	157	248	404	TTTCTCTTTCTGGGTGGTGG	60.081	20	GCCAAGATGTGATCTGCCAT	61.049	20	154	248	401	TTTCTCTTTCTGGGTGGTGG	60.081	20	TTCACTTCCCTTCCCTTCATT	59.926	21	113	248	360
TR55311_c0_g1	TCGATTTGTCATCCAAGTTGTT	59.476	22	GATGTGTTAAAAACCGAAAAGG	57.74	22	259	551	809	TCGATTTGTCATCCAAGTTGTT	59.476	22	AGATGTGTTAAAAACCGAAAAGG	58.664	23	260	551	810	TCGATTTGTCATCCAAGTTGTT	59.476	22	TGTTAAAAACCGAAAAGGTATCC	58.541	23	255	551	805
TR5093_c0_g1	TTATTGCCACACAACCAACG	60.415	20	TTTCTTCAAGGGAGGGTGGT	60.852	20	244	995	1238	TTATTGCCACACAACCAACG	60.415	20	TTTTTCTTCAAGGGAGGGTG	59.143	20	246	995	1240	GATCCAGTGCGAACAGTGAG	59.42	20	TTTCTTCAAGGGAGGGTGGT	60.852	20	103	1136	1238
TR20201_c0_g2	CAACCACCCACCCATGAC	60.664	18	CATGTGGGATTGTCAAGTGAA	59.405	21	232	0	231	CAACCACCCACCCATGAC	60.664	18	GGGATTGTCAAGTGAAACCA	58.387	20	227	0	226	AACCACCCACCCATGACC	61.515	18	TTTTGACATGTGGGATTGTCA	59.808	21	237	1	237
TR41321_c4_g1	GGTGCATCACAGGAAAAGGT	59.973	20	CATTCCAGCTTGAGTGCAAA	59.988	20	270	355	624	AGGGTGCATCACAGGAAAAG	60.111	20	CATTCCAGCTTGAGTGCAAA	59.988	20	272	353	624	GTGCATCACAGGAAAAGGTG	59.139	20	CATTCCAGCTTGAGTGCAAA	59.988	20	269	356	624
TR46708_c0_g1	TATTTGTGGTGCTGGGTTCA	59.964	20	TGAGGCAAGGCAGCTAATCT	60.118	20	268	1844	2111	TATTTGTGGTGCTGGGTTCA	59.964	20	AAACCAACCACAGGAAATGC	59.836	20	214	1844	2057	TTGTGGTGCTGGGTTCACTA	60.152	20	TGAGGCAAGGCAGCTAATCT	60.118	20	265	1847	2111
TR48809_c0_g1	GCCAGCAAGAAGGATGAAAG	59.955	20	ATTGCAATGGCTTTCTGGAT	59.533	20	271	2347	2617	CCAGCAAGAAGGATGAAAGC	59.955	20	ATTGCAATGGCTTTCTGGAT	59.533	20	270	2348	2617	CACGTCCTGGGTTATCATCA	59.369	20	CAAACTGAGCAATTGGGGTT	59.971	20	243	2457	2699
TR48809_c0_g1	AACGTTTGTTTTCCCATTGTT	58.39	21	ACGCAAATTGTTCACAAACG	59.632	20	256	3026	3281	CAAATTAACGTTTGTTTTCCCA	58.934	22	ACGCAAATTGTTCACAAACG	59.632	20	262	3020	3281	TGGACTGAGTTGAGAGTGAATGA	59.899	23	GACCAGTCTCCATTTCAGCC	59.661	20	195	3161	3355
TR48096_c0_g2	ACTGGATTTGGGGCATTTTT	60.542	20	AGGTTTCATGTTTGCGTTCA	59.174	20	280	642	921	ACTGGATTTGGGGCATTTTT	60.542	20	GGTTTCATGTTTGCGTTCAC	59.028	20	279	642	920	ACTGGATTTGGGGCATTTTT	60.542	20	GGTTTCATGTTTGCGTTCACT	60.03	21	279	642	920
TR48096_c0_g2	TGAACGCAAACATGAAACCT	59.174	20	TCTTCCGAAATAAGCGGAGA	59.916	20	156	902	1057	AACGCAAACATGAAACCTCA	59.174	20	TCTTCCGAAATAAGCGGAGA	59.916	20	154	904	1057	AACGCAAACATGAAACCTCA	59.174	20	AACCATTCGCCAGAAAACAG	60.11	20	134	904	1037
TR57747_c0_g1	CTAGCATCCAGTGGCAGTGA	60.008	20	CGGCTATACCCAGATTTCCA	59.916	20	183	684	866	TGTCTAGCATCCAGTGGCAG	60.008	20	CGGCTATACCCAGATTTCCA	59.916	20	186	681	866	GTGGCAGTGACAGGGATTTT	59.973	20	CGGCTATACCCAGATTTCCA	59.916	20	173	694	866
TR12883_c1_g1	TTTGTACAGCGAAGCCTGAA	59.609	20	TTGCACAAAACAATTGTCACAT	58.992	22	259	17288	17546	AACCCTTTGTACAGCGAAGC	59.383	20	TTGCACAAAACAATTGTCACAT	58.992	22	264	17283	17546	CTTTGTACAGCGAAGCCTGA	59.22	20	TTGCACAAAACAATTGTCACAT	58.992	22	260	17287	17546
TR41542_c5_g1	CTGATTTCCCTTCGTGCTGT	60.255	20	TGTTGAAAGTGTTCCTGGTCA	59.172	21	178	734	911	ACTGATTTCCCTTCGTGCTG	60.255	20	TGTTGAAAGTGTTCCTGGTCA	59.172	21	179	733	911	CTGATTTCCCTTCGTGCTGT	60.255	20	TGAAAGTGTTCCTGGTCAAATG	60.008	22	175	734	908
TR25125_c0_g1	AATGCTGGGAACTTGACACA	59.139	20	AAACTTTCTGCTAGCAATTTGAA	57.505	23	154	3013	3166	TGCTGGGAACTTGACACATT	59.139	20	AAACTTTCTGCTAGCAATTTGAA	57.505	23	152	3015	3166	GCTGGGAACTTGACACATTG	59.139	20	AAACTTTCTGCTAGCAATTTGAA	57.505	23	151	3016	3166
TR24422_c0_g1	CTGTCAGTGGTCGTGCATCT	59.897	20	AGTCAGGGCAAAATCAGTGAA	59.726	21	176	1906	2081	GCAGACAGAACAAACGGTGA	59.88	20	AGTCAGGGCAAAATCAGTGAA	59.726	21	131	1951	2081	CTGTCAGTGGTCGTGCATCT	59.897	20	GTCAGGGCAAAATCAGTGAA	58.697	20	175	1906	2080
TR27950_c1_g2	TGAAACTGGAAAGTGGAGTGG	60.133	21	CAAAGGTGCTCTGTGCTGTG	60.651	20	262	810	1071	TGAAACTGGAAAGTGGAGTGG	60.133	21	AAAGGTGCTCTGTGCTGTGTT	59.968	21	261	810	1070	TGAAACTGGAAAGTGGAGTGG	60.133	21	AGGTGCTCTGTGCTGTGTTTT	59.968	21	259	810	1068
TR16904_c1_g1	TATCGGTTGCAGACAGGTTG	59.716	20	TACACAGAGCCATCGGTGAG	59.855	20	280	1284	1563	AGACAGGTTGTCGATCGGTT	59.579	20	CCCCAGTTACACAGAGCCAT	59.989	20	277	1294	1570	AGACAGGTTGTCGATCGGTT	59.579	20	TACACAGAGCCATCGGTGAG	59.855	20	270	1294	1563
TR16904_c1_g1	TATCGGTTGCAGACAGGTTG	59.716	20	TACACAGAGCCATCGGTGAG	59.855	20	280	1284	1563	AGACAGGTTGTCGATCGGTT	59.579	20	CCCCAGTTACACAGAGCCAT	59.989	20	277	1294	1570	GACAACACGCATCTTTTCCC	60.504	20	CCCCAGTTACACAGAGCCAT	59.989	20	155	1416	1570
TR17653_c1_g1	AACACAGGACTGGGGAAAAA	59.425	20	TCACACCACGTCCAAAAGAA	60.128	20	237	877	1113	AACACAGGACTGGGGAAAAA	59.425	20	TTCACACCACGTCCAAAAGA	60.128	20	238	877	1114	AAACACAGGACTGGGGAAAA	59.425	20	TCACACCACGTCCAAAAGAA	60.128	20	238	876	1113
TR17659_c0_g1	CCGGATTAAAAGGATGGTGT	58.762	20	CTGGCTATAAGCCTTTGGCA	60.356	20	175	239	413	ACCGGATTAAAAGGATGGTG	58.762	20	CTGGCTATAAGCCTTTGGCA	60.356	20	176	238	413	ACCGGATTAAAAGGATGGTG	58.762	20	CGTGGAATCGTGTGATCCTA	59.522	20	201	238	438
TR41571_c0_g1	GCCAGGTTTGTCCTTATCTTG	58.707	21	TGGAAAGAGAACGGCATCAT	60.603	20	280	251	530	CCAGGTTTGTCCTTATCTTGCT	59.653	22	TGGAAAGAGAACGGCATCAT	60.603	20	279	252	530	GCCAGGTTTGTCCTTATCTTG	58.707	21	GGAAAGAGAACGGCATCATT	59.129	20	279	251	529
TR26440_c4_g1	ATTTGGACCCTTCCGAGAGT	59.935	20	TGGAGTCATTGTAATGCAGGA	59.138	21	220	463	682	ATTTGGACCCTTCCGAGAGT	59.935	20	GCTTGGAGTCATTGTAATGCAG	59.775	22	223	463	685	GGACCCTTCCGAGAGTTTTT	59.553	20	TGGAGTCATTGTAATGCAGGA	59.138	21	216	467	682
TR26440_c4_g1	TTGAAATCCCTTCAGATGCC	60.014	20	TGGACGTTGGTCAGTTTTGA	60.128	20	227	742	968	TTGAAATCCCTTCAGATGCC	60.014	20	GGTGGACGTTGGTCAGTTTT	59.867	20	229	742	970	TTGAAATCCCTTCAGATGCC	60.014	20	TTCTTACGGTGGACGTTGGT	60.41	20	236	742	977
TR58042_c0_g2	CATGAGCCTTGTCAAAGCAA	59.988	20	TGAAGACATGCACACGATGA	59.823	20	267	744	1010	CATGAGCCTTGTCAAAGCAA	59.988	20	ATGCACACGATGAAATGAGC	59.685	20	260	744	1003	CATGAGCCTTGTCAAAGCAA	59.988	20	CACTGAAGACATGCACACGA	59.431	20	270	744	1013
TR27114_c0_g1	AAAGCTGGAGTTGAAAGGCA	59.993	20	TTGGCAATAATGAATTTGCAC	58.55	21	225	2068	2292	AAAGCTGGAGTTGAAAGGCA	59.993	20	GAATTTGCACTTGTTGGTATGC	59.523	22	214	2068	2281	AAAGCTGGAGTTGAAAGGCA	59.993	20	GGCAATAATGAATTTGCACTTG	59.499	22	223	2068	2290
TR46132_c0_g1	TCTACACTGTTTGCCCATGC	59.722	20	AAGGTCCAAACTTGTCTGCG	60.291	20	275	56	330	CTGTTTGCCCATGCCATAAT	60.721	20	AAGGTCCAAACTTGTCTGCG	60.291	20	269	62	330	TCTACACTGTTTGCCCATGC	59.722	20	TCTGCGGAAGACCACAGAAT	60.801	20	261	56	316
TR30101_c2_g1	TTGACATCAGACTTCTGTGTTGG	60.2	23	GGCTAACCCTTTTATCAAACAA	57.415	22	267	924	1190	TGACATCAGACTTCTGTGTTGG	58.777	22	GGCTAACCCTTTTATCAAACAA	57.415	22	266	925	1190	TTGACATCAGACTTCTGTGTTGG	60.2	23	AGGCTAACCCTTTTATCAAACAA	58.337	23	268	924	1191
TR25172_c0_g1	TTTTCGTAAATGGCGGAGTC	60.074	20	TGGCCCGAGATAAATCGTTA	60.415	20	191	2952	3142	TTTTCGTAAATGGCGGAGTC	60.074	20	TACCTGATGGCCCGAGATAA	60.427	20	198	2952	3149	TTTTCGTAAATGGCGGAGTC	60.074	20	TTACCTGATGGCCCGAGATA	60.427	20	199	2952	3150
TR51756_c1_g2	GAATTCAGCTGTGGCACAAA	59.847	20	CCGAGAAAGGAGATACGCTG	59.971	20	203	1430	1632	GAATTCAGCTGTGGCACAAA	59.847	20	CGAGACAGGGATCGTGACTT	60.261	20	169	1430	1598	GAATTCAGCTGTGGCACAAA	59.847	20	ACAGGGATCGTGACTTCAGC	60.269	20	165	1430	1594
TR51732_c2_g5	TTATGATCTTGGGCAAAGGG	59.894	20	GTGACATGCCTTTGAATTGC	59.131	20	205	2882	3086	CAGATCCCCGAGATTTGAGA	60.15	20	GTGACATGCCTTTGAATTGC	59.131	20	244	2843	3086	TATGATCTTGGGCAAAGGGA	60.405	20	GTGACATGCCTTTGAATTGC	59.131	20	204	2883	3086
TR51732_c2_g5	CTTCACGCCACATTTCTCCT	60.255	20	CTCTTACAGGGAGCCCACAG	59.861	20	221	5139	5359	CACGCCACATTTCTCCTGTA	59.716	20	CTCTTACAGGGAGCCCACAG	59.861	20	218	5142	5359	CTTCACGCCACATTTCTCCT	60.255	20	CAACTCTTACAGGGAGCCCA	60.246	20	224	5139	5362
TR2116_c0_g1	GCAAGTGGAGATAAGATTGGC	58.803	21	AAAAGGTGTCTCGGATGTCG	60.111	20	273	113	385	GCAAGTGGAGATAAGATTGGC	58.803	21	GGTGTCTCGGATGTCGTCTT	60.12	20	269	113	381	GCAAGTGGAGATAAGATTGGC	58.803	21	AAGGTGTCTCGGATGTCGTC	60.12	20	271	113	383
TR44829_c0_g1	GCGGACTTTGCCAATACCTA	60.096	20	AGCCTTTCGCAGAGGTGTTA	60.015	20	258	1708	1965	GCGGACTTTGCCAATACCTA	60.096	20	TAAGCCTTTCGCAGAGGTGT	60.015	20	260	1708	1967	AGTAAGCATTAACGCGCCAT	59.769	20	TAAGCCTTTCGCAGAGGTGT	60.015	20	241	1727	1967
TR25152_c0_g1	GCATGCTGAGCTGGATCTAA	59.131	20	TGCACAACTGTTTTGGGTCT	59.187	20	115	9	123	GCATGCTGAGCTGGATCTAA	59.131	20	AATGCACAACTGTTTTGGGTC	59.89	21	117	9	125	GCATGCTGAGCTGGATCTAA	59.131	20	TGTCACCAACAAATGGTTTGA	59.849	21	215	9	223
TR45141_c0_g1	CAAGCCATTCAATATTTGTTTTT	57.378	23	AACCAAAACACGAGCCAGAC	60.156	20	251	1	251	ACAAGCCATTCAATATTTGTTTTT	58.155	24	AACCAAAACACGAGCCAGAC	60.156	20	252	0	251	CAAGCCATTCAATATTTGTTTTT	57.378	23	AAACCAAAACACGAGCCAGA	60.668	20	252	1	252
TR7667_c4_g1	GTCGGTGTCAAGAACCCAGT	60.009	20	GCCAGCGAAAAGAGAACATC	59.962	20	233	18	250	TCGTGTCTAAAAACGGGGTC	59.971	20	GCCAGCGAAAAGAGAACATC	59.962	20	250	1	250	ACCACTTTAAAAGGAGCGCA	59.883	20	GCCAGCGAAAAGAGAACATC	59.962	20	157	94	250
TR7667_c4_g1	CACGGGAAAATGTACCTTCG	60.357	20	CGCCTCCGGTCATTTTATT	59.908	19	193	1206	1398	CACGGGAAAATGTACCTTCG	60.357	20	GCCTCCGGTCATTTTATTGAT	60.164	21	192	1206	1397	CACGGGAAAATGTACCTTCG	60.357	20	AACACATCCTAAAATGGGGC	58.765	20	229	1206	1434
TR32839_c0_g1	GAAAGCCATTAATTAACAGTTTGATTT	59.37	27	TCAAAGGGTCATCTCCAAGG	60.042	20	246	525	770	GAAAGCCATTAATTAACAGTTTGATTT	59.37	27	GGTCAAAGGGTCATCTCCAA	59.903	20	248	525	772	GAAAGCCATTAATTAACAGTTTGATTT	59.37	27	TCAAGGGTCAAAGGGTCATC	59.903	20	253	525	777
TR32839_c0_g1	TGGTTAAAAGGGAATTTGTGG	58.839	21	TCAAAGGGTCATCTCCAAGG	60.042	20	132	639	770	TGGTTAAAAGGGAATTTGTGG	58.839	21	TCTCAAGGGTCATTTTTGCC	60.051	20	266	639	904	TGGTTAAAAGGGAATTTGTGG	58.839	21	GGGTCATCTCCAAGGTCAAA	59.903	20	127	639	765
TR29682_c0_g2	CCAACAACACTGAAGAAACCAA	60.045	22	TCAGGATCTGCACTGTCTGC	60.146	20	270	1083	1352	CCAACAACACTGAAGAAACCA	58.66	21	TCAGGATCTGCACTGTCTGC	60.146	20	270	1083	1352	CCAAACATTGAAGCTTGTGAA	58.808	21	GGCACAACCATGCTATCTGA	59.679	20	272	1101	1372
TR28771_c0_g1	ACAGCTGCATCATCGTCATC	59.826	20	TCAAATTTAAGCGGACCACC	59.938	20	278	1240	1517	ACAACAGCTGCATCATCGTC	59.87	20	AAATTTAAGCGGACCACCCT	59.835	20	279	1237	1515	GCTGCATCATCGTCATCAAC	60.242	20	TCAAATTTAAGCGGACCACC	59.938	20	275	1243	1517
TR10450_c0_g1	AAGATGAGGAGCCAGCCTTT	60.349	20	GGGGACACATCAAGCTCACT	60.12	20	244	1269	1512	TACACCAGCACTCAGTGGGA	60.309	20	CAAGCTCACTGTCCGAGTCA	60.178	20	280	1223	1502	AAGATGAGGAGCCAGCCTTT	60.349	20	CAAGCTCACTGTCCGAGTCA	60.178	20	234	1269	1502
TR32875_c1_g1	CCTCCACTCTCTGAGTTGCC	59.986	20	ATACCCAGAAGAGCCAGGGT	59.957	20	240	954	1193	CCTCCACTCTCTGAGTTGCC	59.986	20	CCAAATACCCAGAAGAGCCA	60.066	20	244	954	1197	CGCTGTGGTCCCTCTAAAAC	59.734	20	ATACCCAGAAGAGCCAGGGT	59.957	20	191	1003	1193
TR9077_c5_g6	AGGAAAAACTAGCCCCACCC	61.545	20	AAGTTAACCGCCAACATGATTT	59.778	22	110	447	556	AGGAAAAACTAGCCCCACCC	61.545	20	TCTAAGTTAACCGCCAACATGA	59.647	22	113	447	559	GAAAAACTAGCCCCACCCC	60.678	19	AAGTTAACCGCCAACATGATTT	59.778	22	108	449	556
TR51525_c0_g1	TGTAAACAGAAGTTCTTGGTAGCAT	58.523	25	TTATGTCCTCGTTGCCTTGA	59.272	20	186	12	197	TGTAAACAGAAGTTCTTGGTAGCAT	58.523	25	ACTGTCTTGTTACCGGGAGG	59.062	20	111	12	122	TGTAAACAGAAGTTCTTGGTAGCAT	58.523	25	CTGTCTTGTTACCGGGAGGT	59.062	20	110	12	121
TR38309_c0_g1	AAATATCTTGGAGGGGGTGG	60.011	20	CCAGACAGGTCCTTCGGTAA	60.103	20	215	1897	2111	AAATATCTTGGAGGGGGTGG	60.011	20	GCAACTTTCGGGATGTCTGT	60.119	20	194	1897	2090	AAATATCTTGGAGGGGGTGG	60.011	20	CTTCGGTAAGGCAACTTTCG	59.876	20	204	1897	2100
TR22825_c0_g1	CTTTTGCCAGGAGGTTCTTG	59.846	20	AAAGAGTTTAGGAAAAATCAAGGGA	59.908	25	194	1747	1940	CTTTTGCCAGGAGGTTCTTG	59.846	20	AAGAGTTTAGGAAAAATCAAGGGA	58.791	24	193	1747	1939	TTTGCCAGGAGGTTCTTGAG	60.366	20	AAAGAGTTTAGGAAAAATCAAGGGA	59.908	25	192	1749	1940
TR33255_c0_g1	TATCAGGAGCAACCAGCCTT	59.836	20	TGCCAGATCTATCCCCGTAG	60.051	20	200	1234	1433	TTATCAGGAGCAACCAGCCT	59.836	20	TGCCAGATCTATCCCCGTAG	60.051	20	201	1233	1433	CTGCAGCACAACAGCAAACT	60.245	20	TGCCAGATCTATCCCCGTAG	60.051	20	107	1327	1433
TR24442_c0_g1	AAATGTTTATATCATTTCACAAGGC	57.735	25	TGAGGGGAATGAAAGTCTTGA	59.656	21	238	4	241	AAATGTTTATATCATTTCACAAGGC	57.735	25	TGGTTACCAAGGAAAAGGAAGA	59.974	22	263	4	266	AAATGTTTATATCATTTCACAAGGC	57.735	25	TGAGGGGAATGAAAGTCTTGAT	59.94	22	238	4	241
TR38299_c0_g1	GGCCTTATTTCATGGCAATC	59.374	20	GAGCAAGTCAAACGGGACAT	60.119	20	131	1193	1323	GGCCTTATTTCATGGCAATC	59.374	20	CTGCAAGAGCAAGTCAAACG	59.781	20	137	1193	1329	AATGGTGATTTTAGACGGCCT	59.849	21	GAGCAAGTCAAACGGGACAT	60.119	20	147	1177	1323
TR22549_c0_g2	GCCAGCTGATCTGGATCTACAC	61.184	22	TATTGCCAAAACCCCAGAAG	59.931	20	135	0	134	GCCAGCTGATCTGGATCTACAC	61.184	22	GCCAAAACCCCAGAAGATTT	60.299	20	131	0	130	GCCAGCTGATCTGGATCTACAC	61.184	22	CCTATATTGCCAAAACCCCA	59.655	20	139	0	138
TR17600_c0_g1	AAGAGATCCGGTAGCCAACA	59.694	20	GATTGGCTGAAATGGCAACT	60.081	20	222	1406	1627	GAGATCCGGTAGCCAACACT	59.166	20	GATTGGCTGAAATGGCAACT	60.081	20	220	1408	1627	AGAGATCCGGTAGCCAACAC	59.166	20	GATTGGCTGAAATGGCAACT	60.081	20	221	1407	1627
TR31146_c0_g1	AAGCAGGGAACCACAATCAG	60.111	20	ATCAAAGAGGGCCAGATCCT	60.037	20	198	220	417	ACAGAGAGCAGAGCAGAGGC	60.041	20	AGTGGCGCATCAAGAAGAAT	59.843	20	200	126	325	ACAGAGAGCAGAGCAGAGGC	60.041	20	GCGCATCAAGAAGAATCCAT	60.185	20	196	126	321
TR10627_c5_g4	AATGGACTGGGTGAACGAAG	59.966	20	TTTTCGGATGGGATGTGAAT	60.133	20	131	1158	1288	GGGTGAACGAAGGAATTGAA	59.91	20	TTTTCGGATGGGATGTGAAT	60.133	20	123	1166	1288	ATGGAATGGACTGGGTGAAC	59.636	20	TTTTCGGATGGGATGTGAAT	60.133	20	135	1154	1288
TR55675_c0_g1	TCCCTAACCACAACACCCAT	60.088	20	CTCAAGGGCATGACCAATTT	59.933	20	198	1253	1450	TCTCCCTAACCACAACACCC	59.82	20	CTCAAGGGCATGACCAATTT	59.933	20	200	1251	1450	AATTATGCCCCACAGGTCAA	60.192	20	CTCAAGGGCATGACCAATTT	59.933	20	126	1325	1450
TR23439_c3_g1	ACCATTCACCCAATCTCTCG	59.927	20	TTCTCCTGTCAGTGGGCTCT	59.986	20	262	217	478	TGAACAGCCTGTGAGTCAGC	60.187	20	GATGCACTTGACTGCCTTGA	59.992	20	274	254	527	TGAACAGCCTGTGAGTCAGC	60.187	20	TTCTCCTGTCAGTGGGCTCT	59.986	20	225	254	478
TR57792_c0_g2	AACAGTAGTACCCCACCCCC	59.972	20	TCGCCAAATTTGTTGTGAAA	60.088	20	280	2192	2471	AACAGTAGTACCCCACCCCC	59.972	20	CGCCAAATTTGTTGTGAAAA	59.579	20	279	2192	2470	CAACAGTAGTACCCCACCCC	59.183	20	CGCCAAATTTGTTGTGAAAA	59.579	20	280	2191	2470
TR21391_c0_g1	GACCTGGTAAAAAGGCCAAA	59.064	20	TATCCTCGCCATCCACTTTC	60.036	20	234	1545	1778	GACCTGGTAAAAAGGCCAAA	59.064	20	CACTATCCTCGCCATCCACT	60.096	20	237	1545	1781	AAGACCTGGTAAAAAGGCCAA	59.987	21	TATCCTCGCCATCCACTTTC	60.036	20	236	1543	1778
TR53757_c0_g1	GCGAACTTAAAGAGTCTGGCA	59.646	21	GCCGATTTCGCGTACATATT	59.956	20	147	537	683	TCCGCGAACTTAAAGAGTCTG	59.64	21	GCCGATTTCGCGTACATATT	59.956	20	150	534	683	TTACTCACGCATATTTCCGC	58.796	20	CTTTTTGCATGACAACTCGC	59.469	20	183	519	701
TR53757_c0_g1	CGTCCGACTGTCGTATCAAA	59.716	20	TGCGAAACGAACTGAACATC	59.847	20	257	1811	2067	CGTCCGACTGTCGTATCAAA	59.716	20	GATGCGAAACGAACTGAACA	59.847	20	259	1811	2069	CGTCCGACTGTCGTATCAAA	59.716	20	GGATGCGAAACGAACTGAAC	60.646	20	260	1811	2070
TR23443_c0_g1	CACCCTTTGTGTTGGTTATGC	60.277	21	TTACCATGATCTTTTCTGATATGC	57.384	24	173	2744	2916	CACCCTTTGTGTTGGTTATGC	60.277	21	TCTTTGTAGTACAGGTGAAGACATGA	59.301	26	213	2744	2956	CACCCTTTGTGTTGGTTATGC	60.277	21	TTTGTAGTACAGGTGAAGACATGAAA	59.201	26	211	2744	2954
TR30205_c0_g1	CCAGGAGCTTGATTTCTCCA	60.331	20	TGTTGTTGGGGGTTTGTATG	59.145	20	273	1407	1679	TCCAGGAGCTTGATTTCTCC	59.361	20	TGTTGTTGGGGGTTTGTATG	59.145	20	274	1406	1679	CCAGGAGCTTGATTTCTCCA	60.331	20	TTGTTGGGGGTTTGTATGAA	58.719	20	271	1407	1677
TR9394_c0_g1	AGTAACAAAGCCATGTCGCC	60.14	20	ACCTTGTAAATGCCCTGACG	59.993	20	278	3554	3831	AGTAACAAAGCCATGTCGCC	60.14	20	TGCCCTGACGTCACAAATTA	60.111	20	268	3554	3821	AGTAACAAAGCCATGTCGCC	60.14	20	TAAATGCCCTGACGTCACAA	60.111	20	272	3554	3825
TR14750_c0_g1	TGCATGTAAACGCAAATAATCA	59.134	22	TAACCTTGGGCACTGGAGTT	59.592	20	254	1905	2158	TGCATGTAAACGCAAATAATCA	59.134	22	AACCTTGGGCACTGGAGTTT	60.912	20	253	1905	2157	TGCATGTAAACGCAAATAATCAA	60.372	23	TAACCTTGGGCACTGGAGTT	59.592	20	254	1905	2158
TR35743_c0_g1	TTGTTGTTGTGTTTTGTTTGTTTG	59.888	24	AATCTGCGAAGCACAAACCT	59.882	20	272	323	594	TGTTTTGTTGTTGTGTTTTGTTTG	59.888	24	AATCTGCGAAGCACAAACCT	59.882	20	276	319	594	TTGTTGTTGTGTTTTGTTTGTTTG	59.888	24	ATCTGCGAAGCACAAACCTT	59.882	20	271	323	593
TR53773_c0_g1	TCCTGTGTCAGAGTTACATCCC	59.065	22	ACTTCTGTGCTGGCTGACCT	60.057	20	276	1223	1498	TCCTGTGTCAGAGTTACATCCCT	60.045	23	ACTTCTGTGCTGGCTGACCT	60.057	20	276	1223	1498	TCCTGTGTCAGAGTTACATCCC	59.065	22	TCTGTGCTGGCTGACCTAGA	59.726	20	273	1223	1495
TR48096_c0_g1	TCTAATAATTTGACCGCCGC	60.061	20	ACATTTCCTCTGCTGGATGC	60.226	20	273	652	924	CACCACTGCAGATTTCCTGA	59.831	20	ACATTTCCTCTGCTGGATGC	60.226	20	220	705	924	CTGTCCGCCATTACACCACT	60.975	20	ACATTTCCTCTGCTGGATGC	60.226	20	233	692	924
TR16476_c0_g1	GTCTGCACCGGTGGATAACT	59.997	20	GTCGGCGTTCCTTCATTCTA	60.214	20	164	240	403	GTCTGCACCGGTGGATAACT	59.997	20	ATTCTGCCTCAGTACGTCGG	60.277	20	179	240	418	GTCTGCACCGGTGGATAACT	59.997	20	TCGGCGTTCCTTCATTCTAT	59.668	20	163	240	402
TR23792_c2_g4	TGCGAGGGGGTAATATTCAA	60.281	20	CCTGTGTACGCTCATGGTTG	60.175	20	123	424	546	TGCGAGGGGGTAATATTCAA	60.281	20	AATGTGCCTGTGTACGCTCA	60.333	20	129	424	552	TGCGAGGGGGTAATATTCAA	60.281	20	GTGTACGCTCATGGTTGCAG	60.333	20	120	424	543
TR43082_c0_g2	GACCCCGTAACAACTGAGTGA	60.02	21	ACCCAGATGGCTTATCATGC	59.923	20	239	1056	1294	CCCCGTAACAACTGAGTGAA	58.621	20	ACCCAGATGGCTTATCATGC	59.923	20	237	1058	1294	TTGACCCCGTAACAACTGAG	58.621	20	ACCCAGATGGCTTATCATGC	59.923	20	241	1054	1294
TR43082_c0_g2	TTTGGACAAGAAGACCCACC	59.943	20	TCTACACCGTTGGCAATTCA	60.111	20	220	2321	2540	ATGATCATCACCCCCTGAAA	60.135	20	TCTACACCGTTGGCAATTCA	60.111	20	183	2358	2540	TCAGCCTGCTGAGTCAAATG	60.136	20	TCTACACCGTTGGCAATTCA	60.111	20	109	2432	2540
TR3299_c6_g2	TGCTGAGAAAAATGTGACGG	59.84	20	TTAATTATACCCCCGCTTCG	58.957	20	114	104	217	CAGGCTGCTGCATGTTAAAG	59.632	20	TTAATTATACCCCCGCTTCG	58.957	20	135	83	217	TGCTGAGAAAAATGTGACGG	59.84	20	GTTAATTATACCCCCGCTTCG	59.72	21	115	104	218
TR29879_c0_g1	TGAGTGTCTGCTGCTTTATGC	59.239	21	CGCGCTTCTGGTTTTATTGA	61.251	20	171	576	746	TGAGTGTCTGCTGCTTTATGC	59.239	21	GCGCGCTTCTGGTTTTATT	60.358	19	172	576	747	TGGTGCGTTCATGTTTATTG	58.046	20	CGCGCTTCTGGTTTTATTGA	61.251	20	197	550	746
TR15829_c0_g1	AAAACAAGGCTGGGTTTTCC	60.332	20	TCAACTGCGTCTAGTTGCTTG	59.28	21	256	1283	1538	AAAACAAGGCTGGGTTTTCC	60.332	20	CAACTGCGTCTAGTTGCTTGA	59.28	21	255	1283	1537	AAAACAAGGCTGGGTTTTCC	60.332	20	GGCTTACCATATCAACTGCG	58.268	20	267	1283	1549
TR23858_c0_g1	TGAGCACAATAAAGCAAGGG	58.917	20	ACATTGTCAGCTAAAAGGGGT	57.737	21	264	9213	9476	AAGGGAGATGACTTTCAAGGG	59.562	21	ACATTGTCAGCTAAAAGGGGT	57.737	21	249	9228	9476	TGAGCACAATAAAGCAAGGG	58.917	20	TTACATTGTCAGCTAAAAGGGG	58.323	22	266	9213	9478
TR49765_c1_g2	TCACAGCTTTCGTTACGGTG	59.904	20	AGCCTCTGCCACTAGTTTGG	59.496	20	256	348	603	TCACAGCTTTCGTTACGGTG	59.904	20	TGCCACTAGTTTGGCATGTT	59.199	20	250	348	597	TCACAGCTTTCGTTACGGTG	59.904	20	AAGGTTCTAAGCCTCTGCCA	59.077	20	265	348	612
TR40272_c7_g1	TCTCCATTCTTCCTTTTTCTTTG	58.916	23	TGCGGTATTTAGCTTTCCTTAGA	59.464	23	220	1096	1315	TTCTCCATTCTTCCTTTTTCTTTG	60.101	24	TGCGGTATTTAGCTTTCCTTAGA	59.464	23	221	1095	1315	TCTCCATTCTTCCTTTTTCTTTGT	59.665	24	TGCGGTATTTAGCTTTCCTTAGA	59.464	23	220	1096	1315
TR25507_c50_g29	CCATGGTTACCCATTCTCCA	60.572	20	ATACAAGCAGGTGCGAAAGC	60.416	20	272	570	841	CCATGGTTACCCATTCTCCA	60.572	20	AAAAAGGCATGCTGTGTTCA	59.322	20	149	570	718	CCATGGTTACCCATTCTCCA	60.572	20	TACAAGCAGGTGCGAAAGC	60.15	19	271	570	840
TR24617_c0_g1	CTTAAAGGGCTCAAAAGGGG	60.062	20	TGTCCTGAGTAATGATTGCATTG	60.011	23	232	697	928	AAGGGGTATTCATTGCCAGA	59.387	20	TGTCCTGAGTAATGATTGCATTG	60.011	23	278	651	928	GAAGGGGTATTCATTGCCAG	59.387	20	TGTCCTGAGTAATGATTGCATTG	60.011	23	279	650	928
TR50112_c0_g1	TTGACTGCCCAGTGTCAGAG	60.022	20	AGCATTGACGTTTCTTTGAGC	59.513	21	193	1701	1893	TTGACTGCCCAGTGTCAGAG	60.022	20	GCATTGACGTTTCTTTGAGC	58.504	20	192	1701	1892	CCAAAAGTTTGCAGGCTAGG	59.876	20	AGCATTGACGTTTCTTTGAGC	59.513	21	243	1651	1893
TR4225_c0_g1	GCCAAGAAAGAGGAAAAGGG	60.18	20	AGGGATAATTTCCTGCGCTT	60.061	20	222	3243	3464	GGCCAAGAAAGAGGAAAAGG	60.18	20	AGGGATAATTTCCTGCGCTT	60.061	20	223	3242	3464	GCCAAGAAAGAGGAAAAGGG	60.18	20	CATCCCCATTCTCAGGGATA	59.703	20	235	3243	3477
TR43132_c1_g2	CAAGTCAATTGCTGCCTTCA	59.988	20	TGTGCTTTCCATCTTCATCG	59.799	20	266	374	639	CAAGTCAATTGCTGCCTTCA	59.988	20	GCTTTCCATCTTCATCGCTT	59.415	20	263	374	636	AAACACGATGGGCAGAAAAA	60.481	20	CAGCGGTTGTGCAAAATATG	60.133	20	231	432	662
TR46163_c2_g2	CAGATCTTTGAACCAATTTTGAC	57.788	23	GGCTGAAATGGTGACTGGTT	59.973	20	272	762	1033	ACAGATCTTTGAACCAATTTTGA	57.788	23	GGCTGAAATGGTGACTGGTT	59.973	20	273	761	1033	CAGATCTTTGAACCAATTTTGACT	58.738	24	GGCTGAAATGGTGACTGGTT	59.973	20	272	762	1033
TR23494_c0_g1	GAACATGTTTTACACAAACTGAGAAA	58.762	26	ACTTCCTGTGGACTTGGACG	60.151	20	228	59	286	AAGAACATGTTTTACACAAACTGAGAA	59.599	27	ACTTCCTGTGGACTTGGACG	60.151	20	230	57	286	AAAGAACATGTTTTACACAAACTGAGA	59.599	27	ACTTCCTGTGGACTTGGACG	60.151	20	231	56	286
TR3137_c0_g1	GGATCTACAATTTTCGCCCA	59.901	20	TGGATCATTGGAATTTGCAT	58.77	20	259	116	374	TGGATCTACAATTTTCGCCC	59.901	20	TGGATCATTGGAATTTGCAT	58.77	20	260	115	374	ATTTTCGCCCACCACATAAA	60.188	20	TGGATCATTGGAATTTGCAT	58.77	20	250	125	374
TR21361_c0_g1	CGACAGGTGCTCCGAATTTA	61.157	20	CAATTTTCGCACAGAACCCT	60.11	20	130	29	158	TAATTTCGACAGGTGCTCCG	61.157	20	CAATTTTCGCACAGAACCCT	60.11	20	136	23	158	CGACAGGTGCTCCGAATTTA	61.157	20	AGCAATTTTCGCACAGAACC	60.257	20	132	29	160
TR41284_c0_g1	GGTCTGGACGGAAGTTCAAA	60.088	20	GATTCATGTGCATTGGTTGG	59.781	20	272	423	694	GCCAAGTCCTCGAGACAAAC	59.851	20	GATTCATGTGCATTGGTTGG	59.781	20	239	456	694	GGTCTGGACGGAAGTTCAAA	60.088	20	AGATCATTGAACCACCCGAA	60.317	20	219	423	641
TR44699_c0_g1	GTTTAGATCCAGATCAGCCG	57.36	20	AACGTGAAAGTTTCGGTTGG	60.008	20	143	0	142	GTTTAGATCCAGATCAGCCG	57.36	20	GTTTCGGTTGGCAGAATGAT	59.939	20	134	0	133	GTTTAGATCCAGATCAGCCG	57.36	20	GAGATGCATCCCTGACCTGT	60.08	20	261	0	260
TR23905_c0_g1	TGTAGCTCTGTGGGCTGAGA	59.726	20	GGTTCACCGAGGAGAAACAA	60.088	20	241	1589	1829	CTGAAGGCCAGGTTGTTGTT	60.149	20	GTCCCCCACATCTGACAAAC	60.223	20	248	1522	1769	GCCAGGTTGTTGTTGCACTA	59.764	20	GTCCCCCACATCTGACAAAC	60.223	20	242	1528	1769
TR43274_c0_g1	AGCGGGTCAAATGTAAGTGG	59.993	20	AGCCAACGATCGAGGTTTTA	59.708	20	271	75	345	AATAAATTCGCGACTCGTGC	60.238	20	GTTTCGCGCGTAAAAATGAT	60.102	20	230	153	382	ACGAGTTAGGCCGACAACAG	60.312	20	ATGGGCGTGACCATATTCAT	60.043	20	243	259	501
TR43274_c0_g1	CGAGGATGTGGAAGCTCTGT	60.408	20	CCCGTCCAGATTAAGGAACA	59.926	20	243	828	1070	TGTTTTTGCGGATTCATGTG	60.501	20	CCCGTCCAGATTAAGGAACA	59.926	20	226	845	1070	GAAGCTCTGTTTTTGCGGAT	59.457	20	CCCGTCCAGATTAAGGAACA	59.926	20	233	838	1070
TR11290_c0_g1	GCCCATGCAAGTAAACCAAC	60.374	20	CCCATTCAGGCTGTGAAACT	60.111	20	245	2498	2742	CCTCCAGGATTTATGCCTCC	60.787	20	CCCATTCAGGCTGTGAAACT	60.111	20	223	2520	2742	TTTTATGAGAGGTCCAGCCC	59.126	20	CTCCAGATTGGTTCCCTGAA	60.042	20	242	2579	2820
TR7132_c0_g3	TCACTTTGACAGTTTGGGCA	60.278	20	TTCAAATTTCTTCCCTCCACA	59.532	21	232	2078	2309	TCACTTTGACAGTTTGGGCA	60.278	20	TCAAATTTCTTCCCTCCACAA	59.532	21	231	2078	2308	CGGTAACCATAGCAACTGCC	60.523	20	TCAAATTTCTTCCCTCCACAA	59.532	21	207	2102	2308
TR4518_c0_g1	ATCTGATGTTTCGCCTGCTT	59.843	20	AGCAATATACCCCCGCTTCT	59.951	20	245	1357	1601	ATCTGATGTTTCGCCTGCTT	59.843	20	AAAGCAATATACCCCCGCTT	59.829	20	247	1357	1603	GATCTGATGTTTCGCCTGCT	60.37	20	AGCAATATACCCCCGCTTCT	59.951	20	246	1356	1601
TR10709_c1_g1	TCCTTACCGGCATCTCAAAC	60.074	20	GAGCATTCTGTGGGTGGAAT	59.934	20	229	2307	2535	TCCTTACCGGCATCTCAAAC	60.074	20	TGTTGTTGGTTTCTTGCAGC	59.888	20	203	2307	2509	TCCTTACCGGCATCTCAAAC	60.074	20	ATTCTGCGTTTGCCTTGTCT	59.882	20	181	2307	2487
TR8999_c5_g2	ATAGGTCACCGCGCTAAATG	60.117	20	TCCAGATAAAACATGGAAACCC	60.055	22	259	1406	1664	TGAAAAAGCAACAAAAGCGA	59.603	20	TCCAGATAAAACATGGAAACCC	60.055	22	204	1461	1664	GCGAAGCGATTTTGCTTATT	59.481	20	TCCAGATAAAACATGGAAACCC	60.055	22	155	1510	1664
TR35268_c1_g1	GAGCGACAACAGAATCAGCA	60.144	20	GTTCCGGAGGGGTCATAGAT	60.154	20	268	1001	1268	AATCAGCAGCTGCAACAGAA	59.746	20	GTTCCGGAGGGGTCATAGAT	60.154	20	256	1013	1268	GAATCAGCAGCTGCAACAGA	60.296	20	GTTCCGGAGGGGTCATAGAT	60.154	20	257	1012	1268
TR3049_c0_g1	TCTCACGCTTCTTCCCTCTC	59.679	20	ATTTGCAATGTTTGCGACCT	60.511	20	181	2153	2333	TCTCTCACGCTTCTTCCCTC	59.679	20	ATTTGCAATGTTTGCGACCT	60.511	20	183	2151	2333	TTTCTCTCACGCTTCTTCCC	59.55	20	ATTTGCAATGTTTGCGACCT	60.511	20	185	2149	2333
TR9398_c2_g1	CACTGGCATTGAAAGGTGAG	59.288	20	ATCATTTTGTTGTCCGCCAC	60.765	20	162	231	392	CACTGGCATTGAAAGGTGAG	59.288	20	TCCAAATTGTGCCTTTTTCA	59.133	20	278	231	508	CACTGGCATTGAAAGGTGAG	59.288	20	TTGTCCGCCACTGGTAGTATC	60.008	21	153	231	383
TR9398_c2_g1	TGGAATAATAGCACTGAAAATGAAA	59.13	25	AAACCTATCAGTCACACCATGC	58.986	22	270	813	1082	TGGAATAATAGCACTGAAAATGAA	57.918	24	AAACCTATCAGTCACACCATGC	58.986	22	270	813	1082	GATGGAATAATAGCACTGAAAATGAA	59.795	26	AAACCTATCAGTCACACCATGC	58.986	22	272	811	1082
TR9398_c2_g1	CTCTGCATGCTGTGCTTGAT	60.168	20	ATATCATTTTGGTGTCCGCC	59.651	20	219	1850	2068	CTCTGCATGCTGTGCTTGAT	60.168	20	GGTGTCCGCCACTGGTAATA	60.776	20	209	1850	2058	AAAAGGGCTGAATCTGGAGC	60.713	20	ATATCATTTTGGTGTCCGCC	59.651	20	268	1801	2068
TR14453_c0_g2	GCGTTTAGATTCCAAAACTTCG	60.128	22	TGAATTGGCATTCATTTGCT	59.115	20	259	83	341	GCGTTTAGATTCCAAAACTTCG	60.128	22	CTGAATTGGCATTCATTTGC	59.115	20	260	83	342	GCGTTTACAGTAAGAACCCTGC	60.189	22	TGAATTGGCATTCATTTGCT	59.115	20	180	162	341
TR44160_c0_g1	GTTCGCCAAACCAAATCACT	59.978	20	TTTCAATTTCGTTGATGGGC	60.817	20	215	74	288	GTTCGCCAAACCAAATCACT	59.978	20	TGATGGGCCTGTCAGATAAA	59.075	20	203	74	276	GTTCGCCAAACCAAATCACT	59.978	20	TTGATGGGCCTGTCAGATAA	59.075	20	204	74	277
TR40259_c0_g1	TTTCATCATAGCCGTCTCCC	60.036	20	ATCGCCAGAGCTTTTGAAGA	60.096	20	112	3343	3454	TTTCATCATAGCCGTCTCCC	60.036	20	CCAGACCCTTCTGACGCTAC	59.867	20	256	3343	3598	CATCATAGCCGTCTCCCAGT	60.096	20	ATCGCCAGAGCTTTTGAAGA	60.096	20	109	3346	3454
TR48801_c0_g1	TGCTTGAAGTTGCTGGAGAA	59.716	20	GTGGAACATGATGATGGGTG	59.611	20	145	3239	3383	TGCTTGAAGTTGCTGGAGAA	59.716	20	TGGAACATGATGATGGGTGA	60.761	20	144	3239	3382	TGAAAGTAGCTGGGACACCA	59.288	20	GTGGAACATGATGATGGGTG	59.611	20	114	3270	3383
TR35334_c5_g1	TTGAAAAACAATATGTGCCTGC	60.006	22	TTCATCACAAATGAACAAACACA	58.978	23	210	724	933	TTGAAAAACAATATGTGCCTGC	60.006	22	TTTCATCACAAATGAACAAACACA	60.298	24	211	724	934	TGAAAAACAATATGTGCCTGC	58.69	21	TTCATCACAAATGAACAAACACA	58.978	23	209	725	933
TR44673_c1_g1	CAGGTCCATTTCTTGGTGATG	60.36	21	ACCAAGTTCCGGACACAGTT	59.474	20	223	168	390	CAGGTCCATTTCTTGGTGATG	60.36	21	CTAAAATGGCGTACCGAACC	59.474	20	248	168	415	CAGGTCCATTTCTTGGTGATG	60.36	21	GCGTACCGAACCAGAATACC	59.457	20	240	168	407
TR33427_c0_g1	AAAGGGACCGGATATTTTGG	60.013	20	TCTGCCTCGCCTTACTTCAT	59.978	20	133	1963	2095	AAAGGGACCGGATATTTTGG	60.013	20	ATCTGCCTCGCCTTACTTCA	59.978	20	134	1963	2096	CTCCTCTGAAACGCAGCTCT	59.891	20	TCTGCCTCGCCTTACTTCAT	59.978	20	274	1822	2095
TR24200_c0_g1	TGGTTTGTAATGCTCTCGCA	60.401	20	GGTCGTATGCCTTGTCAGGT	59.997	20	276	141	416	AATGCTCTCGCAACATTCAA	59.425	20	GGTCGTATGCCTTGTCAGGT	59.997	20	268	149	416	CGTGGTTTGTAATGCTCTCG	59.342	20	GGTCGTATGCCTTGTCAGGT	59.997	20	278	139	416
TR11611_c0_g1	TACAAGGCAAGGATGCAACA	60.257	20	TTCCTGGCCCAAGTAAACTG	60.103	20	221	482	702	TACAAGGCAAGGATGCAACA	60.257	20	TCCTGGCCCAAGTAAACTGT	59.592	20	220	482	701	CAAGGATGCAACAGCAAATC	59.276	20	TTCCTGGCCCAAGTAAACTG	60.103	20	214	489	702
TR17262_c0_g1	CTGAACTGTCCCCACCAGAT	59.962	20	TTCCATCACCGTGACAAAGA	60.088	20	136	1777	1912	GGTCTTGTCCTTGGAAGCAG	59.844	20	TTCCATCACCGTGACAAAGA	60.088	20	180	1733	1912	TGTGTCCCCTTTATTCCCTG	59.784	20	TTCCATCACCGTGACAAAGA	60.088	20	153	1760	1912
TR52083_c0_g1	TGTCCATTCTGGCATCTTCA	60.201	20	ATGCAATCAGTGTGCCTCAA	60.272	20	168	2	169	TGTCCATTCTGGCATCTTCA	60.201	20	AAATGGTGCGCTTTCAACAT	60.511	20	106	2	107	TGTCCATTCTGGCATCTTCA	60.201	20	GTGTGCCTCAAATTGGGTGT	60.823	20	159	2	160
TR21006_c0_g1	AAACCTTTGCATGAATTTTCG	59.111	21	GCAAAAGAGGCGGATGTAAA	60.209	20	249	727	975	AAACCTTTGCATGAATTTTCG	59.111	21	ACAAGAGGTTCTGATTGCGG	60.255	20	111	727	837	AACCTTTGCATGAATTTTCG	57.754	20	GCAAAAGAGGCGGATGTAAA	60.209	20	248	728	975
TR25843_c0_g1	TCCTGTACGGAGCTTGAACC	60.255	20	TTTACAGGCTGGACCTTTGG	60.103	20	227	1027	1253	TCCTGTACGGAGCTTGAACC	60.255	20	TACAGGCTGGACCTTTGGAC	60.111	20	225	1027	1251	TCCTGTACGGAGCTTGAACC	60.255	20	AGAAGGATGGTGGTCGTCAG	60.112	20	186	1027	1212
TR6604_c1_g1	CATGAACCGCACCAAAATAA	59.42	20	GGGGTAGCAGTGTGGTCTGT	60.033	20	108	34	141	CATGAACCGCACCAAAATAA	59.42	20	AATGGGGTAGCAGTGTGGTC	59.851	20	111	34	144	TGAACCGCACCAAAATAAGA	59.157	20	GGGGTAGCAGTGTGGTCTGT	60.033	20	106	36	141
TR3832_c0_g2	TGAATCTGTAACAAACCTGGGA	59.471	22	AGTTTGCTCTGCCAATTGCT	60.022	20	259	3	261	TGAATCTGTAACAAACCTGGGA	59.471	22	AATGATGCCAGTGAATGCAA	60.08	20	171	3	173	TGAATCTGTAACAAACCTGGGA	59.471	22	TGATGCCAGTGAATGCAAGT	60.272	20	169	3	171
TR3832_c0_g2	TTTGCAGACGTTCACTCGAC	60.032	20	TGCTTGAGCAACCATTATCG	59.833	20	255	562	816	TTTGCAGACGTTCACTCGAC	60.032	20	TTCTTCAACCGCTCTGGAAT	59.813	20	191	562	752	TTTCTACTTGCCCCCATTTG	59.931	20	TGCTTGAGCAACCATTATCG	59.833	20	235	582	816
TR8207_c0_g1	TAGGTTGCATCTACGTCCCC	59.955	20	TCAACAAAAGAAAGAGGCCG	60.357	20	132	81	212	ATCTTTTAGACCAGCGACCG	59.336	20	TCAACAAAAGAAAGAGGCCG	60.357	20	190	23	212	TTGCATCTACGTCCCCTTATG	59.967	21	TCAACAAAAGAAAGAGGCCG	60.357	20	128	85	212
TR41342_c0_g1	TGCTTTTAATTTTGGGACGG	59.937	20	TTACTGTACGGACGACAGCG	59.928	20	273	360	632	TGCTTTTAATTTTGGGACGG	59.937	20	AATAGAGCAAAATGACGGCG	60.23	20	185	360	544	TGCTTTTAATTTTGGGACGG	59.937	20	GACCAGTCGGTTTCTATCGG	59.55	20	239	360	598
TR34499_c0_g1	TGCATGTAAGTGGAGGCAGA	60.413	20	TTGACTCATGCCATCTTTGC	59.805	20	230	955	1184	GGTCCACGCTGCACATATAA	59.572	20	TTGACTCATGCCATCTTTGC	59.805	20	206	979	1184	TGCATGTAAGTGGAGGCAGA	60.413	20	GCCATCTTTGCCCAGTAAGA	60.214	20	221	955	1175
TR4224_c0_g1	CGAAAGAAGCAGCTCAAACC	60.132	20	CGGAATACCACGTGACTGTCT	60.043	21	220	823	1042	GAAAGAAGCAGCTCAAACCG	60.132	20	CGGAATACCACGTGACTGTCT	60.043	21	219	824	1042	CGAAAGAAGCAGCTCAAACC	60.132	20	AAACGGAATACCACGTGACTG	59.906	21	223	823	1045
TR44961_c0_g2	TTTTTCCAGAACAGTGGATAACTT	58.317	24	CTTTTTGTGTCAGGCCCCTT	61.395	20	172	2095	2266	TTTTTCCAGAACAGTGGATAACTT	58.317	24	TTTTGTGTCAGGCCCCTTT	60.48	19	170	2095	2264	TTTTTCCAGAACAGTGGATAACTT	58.317	24	TTTGTGTCAGGCCCCTTTT	60.48	19	169	2095	2263
TR39279_c1_g1	TGATTGCGAGTGACAAACTGA	60.443	21	GACCTGGCTGTTGTTGGTTT	60.012	20	260	311	570	TGATTGCGAGTGACAAACTG	58.409	20	GACCTGGCTGTTGTTGGTTT	60.012	20	260	311	570	CGGAAACTACTCGCATACCA	58.796	20	TATGACCTGGCTGTTGTTGG	59.566	20	166	408	573
TR17342_c4_g4	CTGATTGGCCTTTAAGCTGC	59.982	20	CCGGATCAGCGTTGTTTTAT	59.96	20	233	1590	1822	CTGATTGGCCTTTAAGCTGC	59.982	20	GTTTTGCAGAAAATGTGCGA	59.856	20	151	1590	1740	CTGATTGGCCTTTAAGCTGC	59.982	20	AGAAGCAGGTTCTGCTCACC	59.604	20	252	1590	1841
TR39234_c9_g3	GCGGGTACTTTTTCTTGCAG	59.883	20	GCACAACTGTTTGGTCGTTG	60.199	20	211	965	1175	GCGGGTACTTTTTCTTGCAG	59.883	20	CAGCACAACTGTTTGGTCGT	59.794	20	213	965	1177	GCGGGTACTTTTTCTTGCAG	59.883	20	ACAGCACAACTGTTTGGTCG	59.794	20	214	965	1178
TR39234_c9_g3	TCTGTTGCCAATGTTTACGG	59.585	20	GCAAATGTTGTATATGCGCC	59.059	20	119	1695	1813	TCTGTTGCCAATGTTTACGG	59.585	20	CAAATGTTGTATATGCGCCC	58.914	20	118	1695	1812	TCTGTTGCCAATGTTTACGG	59.585	20	CAAATGTTGTATATGCGCCCT	59.867	21	118	1695	1812
TR28344_c0_g1	ATGTGGTTTGCTTGGTTTGG	60.786	20	AAGCTGCGCTGTGCTAAAAT	60.18	20	100	358	457	CCAGTATGTGGTTTGCTTGG	59.047	20	AAGCTGCGCTGTGCTAAAAT	60.18	20	105	353	457	ATGTGGTTTGCTTGGTTTGG	60.786	20	ACCGGAAAATGACGATCAGA	60.461	20	258	358	615
TR53027_c0_g1	TATTAGCCCCAGGCTTCTCG	61.564	20	CGTTTTTACCTGTCCGGCTA	60.124	20	134	13	146	TTATTAGCCCCAGGCTTCTC	58.418	20	CGTTTTTACCTGTCCGGCTA	60.124	20	135	12	146	TATTAGCCCCAGGCTTCTCG	61.564	20	TATGTCAAAGCCATCGCAAC	59.694	20	178	13	190
TR54144_c5_g1	TCACAGATCAAGGGAATCACA	59.074	21	TTGGACAGCAGACTTTGTGG	59.873	20	254	599	852	TCACAGATCAAGGGAATCACAG	60.111	22	TTGGACAGCAGACTTTGTGG	59.873	20	254	599	852	CACAGATCAAGGGAATCACAGA	60.111	22	TTGGACAGCAGACTTTGTGG	59.873	20	253	600	852
TR14704_c0_g1	CCGTTCAGTTGGTCCTTTGT	60.005	20	ATGGTGCCTTCAAACAGTCC	59.973	20	266	337	602	CATGCTGGATTTCCCTGACT	60.073	20	ATGGTGCCTTCAAACAGTCC	59.973	20	200	403	602	CATGCTGGATTTCCCTGACT	60.073	20	CAATGATGCAGCAAGGAATG	60.22	20	247	403	649
TR2515_c0_g1	TGCATGTCATTCCAGTGTGA	59.658	20	GACATCCGTACAAGCAAGCA	59.871	20	185	935	1119	TGCATGTCATTCCAGTGTGA	59.658	20	TTCCCCAAGGTCAGTCTCAG	60.229	20	270	935	1204	TGCATGTCATTCCAGTGTGA	59.658	20	TCCCCAAGGTCAGTCTCAGT	59.682	20	269	935	1203
TR2515_c0_g1	GCATGATTTCAACCCTCCAT	59.756	20	TCGGAAATGCTATCTGGAAAA	59.668	21	247	1591	1837	GCATGATTTCAACCCTCCAT	59.756	20	AAATCTAAAAGGGGATGGTGC	59.324	21	128	1591	1718	GCATGATTTCAACCCTCCAT	59.756	20	TCGGAAATGCTATCTGGAAA	58.308	20	247	1591	1837
TR56754_c0_g1	TCACAGAGCCCGTATTACTCG	60.277	21	TGAGCACAATGTAAGTTGGACA	59.245	22	277	1592	1868	CCCTTCACAGAGCCCGTAT	60.081	19	GAGCACAATGTAAGTTGGACACA	60.088	23	280	1588	1867	CACAGAGCCCGTATTACTCG	58.405	20	TGAGCACAATGTAAGTTGGACA	59.245	22	276	1593	1868
TR54590_c0_g1	TGGACATGAAATTTTGTGCTTT	59.496	22	TGGGGTACACATTTTTGTGG	59.145	20	158	584	741	TTGGACATGAAATTTTGTGCTT	59.496	22	TGGGGTACACATTTTTGTGG	59.145	20	159	583	741	TCGTGTGTTCTTAAGACTTCGG	59.42	22	TGGGGTACACATTTTTGTGG	59.145	20	119	623	741
TR20298_c0_g1	TGCATTTTGGCAAGTTTGAA	60.229	20	CAGCATGCAAGTTTTTAGCAA	59.155	21	276	173	448	TTGCATTTTGGCAAGTTTGA	60.229	20	CAGCATGCAAGTTTTTAGCAA	59.155	21	277	172	448	TGCATTTTGGCAAGTTTGAA	60.229	20	AACAGCATGCAAGTTTTTAGCA	59.952	22	278	173	450
TR55543_c0_g1	GGTTGACATGAATGCTGTAAATG	59.397	23	TTCTTCTGAAAACGGTGCAG	59.047	20	230	1226	1455	GGTTGACATGAATGCTGTAAATG	59.397	23	TCTTCTGAAAACGGTGCAGAT	59.867	21	229	1226	1454	CATTAGGTTGACATGAATGCTG	58.174	22	TTCTTCTGAAAACGGTGCAG	59.047	20	235	1221	1455
TR38249_c2_g1	CAGCCAATGCTATGCATGTT	59.718	20	CAATGAGGCTGCCCAATTAT	59.923	20	124	869	992	CAGCCAATGCTATGCATGTT	59.718	20	TGTTTATGCGGATGGCAGTA	60.096	20	253	869	1121	CAGCCAATGCTATGCATGTT	59.718	20	GGCTGCCCAATTATATCGTG	60.31	20	118	869	986
TR29276_c0_g2	TCCACTTTGTCAGACGTTGC	59.88	20	GACAAAACAGCTGGTGCAGA	60.032	20	236	2260	2495	GACGTTGCTTCCTCAAGCTC	60.142	20	GACAAAACAGCTGGTGCAGA	60.032	20	224	2272	2495	GACGTTGCTTCCTCAAGCTC	60.142	20	CCACGACAGGAACAGTAGCA	59.897	20	280	2272	2551
TR10612_c0_g1	TTTGCAATTTTTCAAAACAAACA	59.558	23	TGATCACGGTTAGGAAAGGG	59.926	20	278	129	406	TTGCAATTTTTCAAAACAAACA	58.299	22	TGATCACGGTTAGGAAAGGG	59.926	20	277	130	406	TTGCAATTTTTCAAAACAAACAC	59.098	23	TGATCACGGTTAGGAAAGGG	59.926	20	277	130	406
TR46230_c1_g1	AAAAATCGAGGTCAAAAATCAG	57.44	22	GAAGAGAGCATGGAACAGCC	59.957	20	227	1	227	AAAAATCGAGGTCAAAAATCAGT	58.259	23	GAAGAGAGCATGGAACAGCC	59.957	20	227	1	227	AAAAATCGAGGTCAAAAATCAG	57.44	22	GCCGATCTCGAACATTCAGT	60.226	20	210	1	210
TR46230_c1_g1	ACGGTAACGCAAACATCACA	60.035	20	TGACATCCTCAACACCCTCA	60.088	20	243	1726	1968	CACGGTAACGCAAACATCAC	60.035	20	TGACATCCTCAACACCCTCA	60.088	20	244	1725	1968	GCAGATGGTCCAGCCATTAT	59.923	20	TGACATCCTCAACACCCTCA	60.088	20	136	1833	1968
TR3232_c1_g6	TTGAGTGAAAATGTCGAAAACA	58.32	22	TCACAAATAGCGCGGTACAA	60.273	20	233	548	780	TTGAGTGAAAATGTCGAAAACA	58.32	22	TTCACAAATAGCGCGGTACA	60.273	20	234	548	781	TTGAGTGAAAATGTCGAAAACA	58.32	22	GTCTTTCACAAATAGCGCGG	60.772	20	238	548	785
TR26484_c0_g1	ATGGTCAGCTGAGGCTTTGT	59.874	20	TCAGCATCATAAGGACAAATGG	59.96	22	249	1738	1986	TTTTTGCTCGGATCAAGATG	58.843	20	TGCCATTTCTTGTTATCCCTG	59.946	21	243	1857	2099	GTTTCCGTGCTACGGCTTT	60.264	19	TGCCATTTCTTGTTATCCCTG	59.946	21	259	1841	2099
TR51528_c1_g1	GTGTTGCAACCAGGTCAAGA	59.726	20	TTGAATTTTCCTTTGTCGGC	60.053	20	170	717	886	GTGTTGCAACCAGGTCAAGA	59.726	20	ACAGCCAGATGTCCCATTTC	59.934	20	238	717	954	GTGTTGCAACCAGGTCAAGA	59.726	20	CCGTAATTACATCCGCCATC	60.175	20	113	717	829
TR36197_c0_g1	GTTATGTCGGCTTGGGCATA	60.857	20	AGAGAGGAAAAGAGAGCATGG	57.747	21	279	2754	3032	TTATGTCGGCTTGGGCATAC	60.857	20	AGAGAGGAAAAGAGAGCATGG	57.747	21	278	2755	3032	TTATGTCGGCTTGGGCATA	60.043	19	AGAGAGGAAAAGAGAGCATGG	57.747	21	278	2755	3032
TR49030_c0_g1	TGGAAGCAACAGGTTCACTG	59.873	20	TCCTCATGTTGTCCAAACCTC	59.958	21	266	464	729	TGGAAGCAACAGGTTCACTG	59.873	20	TTTCCTCATGTTGTCCAAACC	59.822	21	268	464	731	TGTTGGAAGCAACAGGTTCA	60.278	20	TCCTCATGTTGTCCAAACCTC	59.958	21	269	461	729
TR21246_c0_g1	TCAATGCATTTTGCAGGTGT	60.119	20	CCCATGGGTGGATATTCTTG	60.006	20	121	511	631	CACGCATTCCGACTTGATAA	59.688	20	CCCATGGGTGGATATTCTTG	60.006	20	208	424	631	TCAATGCATTTTGCAGGTGT	60.119	20	AACAAGCAGATGTTCCCTCG	60.255	20	210	511	720
TR34242_c0_g1	CAAGCTCAAGCTCTTGTCCA	59.314	20	TACTGAGCTTGCGACATTGG	60.011	20	269	522	790	CAACAACGGATGCAACAAGA	60.699	20	TACTGAGCTTGCGACATTGG	60.011	20	170	621	790	CAACAACGGATGCAACAAGA	60.699	20	CATCTGGGGCTAGTGGGTAA	59.948	20	190	621	810
TR6760_c0_g1	CAAAACCGCAGGTAATTGCT	60.131	20	TCCGGACAGTCCAAAAGTTC	60.088	20	224	160	383	CAAAACCGCAGGTAATTGCT	60.131	20	TCCAAGAGACGGCTGGTACT	59.867	20	249	160	408	AAAAGTGATGGACAGGTCGC	60.119	20	AAATGACAACAAGTGCACGC	59.77	20	249	71	319
TR33121_c0_g2	ACTCGCGTTCAAACCATAGC	60.278	20	GCCATAAATACTTTGACAATCACG	59.808	24	194	73	266	ACTCGCGTTCAAACCATAGC	60.278	20	CGTCATTTCAAACTATTTCATGC	58.689	23	172	73	244	CCTACTATGGTGGGACTCGC	59.574	20	GCCATAAATACTTTGACAATCACG	59.808	24	208	59	266
TR47610_c0_g1	TTTCCATTGACATGGCTTCA	60.049	20	AGATTTGGGACTGGTTTCCA	59.381	20	276	922	1197	TTTCCATTGACATGGCTTCA	60.049	20	GGACTGGTTTCCATGCTCAG	60.656	20	269	922	1190	TTTCCATTGACATGGCTTCA	60.049	20	TGGTTTCCATGCTCAGCTTT	60.776	20	265	922	1186
TR31969_c2_g1	ACCATTCCCTGCATTGTCTC	59.934	20	GGAAGAAGTAGAAGAAGAAAGTGATGA	59.861	27	169	1600	1768	CCATTATTAGCAGCTTCGCC	59.838	20	GGAAGAAGTAGAAGAAGAAAGTGATGA	59.861	27	150	1619	1768	ATTAGCAGCTTCGCCTTGAC	59.62	20	GGAAGAAGTAGAAGAAGAAAGTGATGA	59.861	27	145	1624	1768
TR23920_c2_g1	CTAATCCACGTGCAACCCTT	59.993	20	ATCTGATTGGCTGAAATGGC	60.043	20	203	869	1071	CTAATCCACGTGCAACCCTT	59.993	20	CAAGCATCTGATTGGCTGAA	59.948	20	208	869	1076	AACCCTAATCCACGTGCAAC	59.859	20	ATCTGATTGGCTGAAATGGC	60.043	20	207	865	1071
TR34473_c0_g1	CGCCTGCTCTAGGAACTTGT	59.639	20	CCACAATTAGCGCTCAGACA	60.011	20	236	1117	1352	CGCCTGCTCTAGGAACTTGT	59.639	20	AAGGTGACCGATGGAAACAG	59.966	20	137	1117	1253	CGCCTGCTCTAGGAACTTGT	59.639	20	TGACCGATGGAAACAGATCA	60.048	20	133	1117	1249
TR28280_c0_g1	AAAATCCCAGCAAAAGTTTACA	57.875	22	GCGTATCCATGGAGTCAAGG	60.483	20	253	1097	1349	AAAATCCCAGCAAAAGTTTACA	57.875	22	AGGCGTATCCATGGAGTCAA	60.483	20	255	1097	1351	TGTGTAAAATAAAATCCCAGCAAA	59.792	24	GCGTATCCATGGAGTCAAGG	60.483	20	263	1087	1349
TR17201_c3_g1	GGAAACGGTGGTTATCCCTT	60.053	20	ATCATTAACCCGAAATGGCA	60.153	20	256	348	603	AAAGGACAATGGAAACGGTG	59.83	20	ATCATTAACCCGAAATGGCA	60.153	20	266	338	603	GGAAACGGTGGTTATCCCTT	60.053	20	TTAACCCGAAATGGCAAAAA	60.287	20	252	348	599
TR27921_c0_g1	GTTTCCGTGCAAAGAAAACG	60.648	20	TCAAAGCAACGTTTGAGCAG	60.172	20	275	643	917	GTTTCCGTGCAAAGAAAACG	60.648	20	ATCAAAGCAACGTTTGAGCA	59.469	20	276	643	918	TCATGTTTGACGTTTCCGTG	60.552	20	CGTTTGAGCAGCATGTTACC	59.347	20	277	632	908
TR51727_c0_g1	TCAATGGAATGGTGAACAGAA	58.961	21	CCATGCAAATGGTCGTGTAA	60.379	20	276	167	442	TCAATGGAATGGTGAACAGAAC	59.836	22	CCATGCAAATGGTCGTGTAA	60.379	20	276	167	442	TCAATGGAATGGTGAACAGA	57.41	20	CCATGCAAATGGTCGTGTAA	60.379	20	276	167	442
TR24919_c0_g1	CATGGTCATGAAATGGTGACA	60.232	21	CATTTCGTTGCGAAACAGTG	60.293	20	210	333	542	TCATGAAATGGTGACAATGGA	59.765	21	CATTTCGTTGCGAAACAGTG	60.293	20	205	338	542	CAATGGAACTTTTGCACCTTC	59.601	21	CATTTCGTTGCGAAACAGTG	60.293	20	191	352	542
TR24919_c0_g1	GGCATGGCCTTCTTTGATTA	60.038	20	TTCAGCTGGCATTTCTTTGA	59.542	20	278	748	1025	GGCATGGCCTTCTTTGATTA	60.038	20	TCAGCTGGCATTTCTTTGAA	59.542	20	277	748	1024	TCCACGCTTGCTGAAGTAAA	59.609	20	TAATCCCTTTCAGCTGGCAT	59.668	20	254	780	1033
TR35957_c2_g2	ACCCACTAACAGGAGTGCCA	60.567	20	AACCAATTCGATTTCAACCAA	59.306	21	276	207	482	CCCACTAACAGGAGTGCCAG	60.701	20	AACCAATTCGATTTCAACCAA	59.306	21	275	208	482	GGAGTGCCAGTTACTGTGCTAA	59.447	22	GCCGAATCGACTTTAACCAA	60.074	20	279	218	496
TR23392_c0_g2	AATACTGCGCTCTCCCCTCT	60.37	20	TGGTACTCTTTACCGCGGAC	60.132	20	212	1038	1249	AATACTGCGCTCTCCCCTCT	60.37	20	CGGACGACAAGTATGCAAGA	59.864	20	197	1038	1234	AATACTGCGCTCTCCCCTCT	60.37	20	TACTCTTTACCGCGGACGAC	60.27	20	209	1038	1246
TR34890_c0_g1	AAGCCATATCAGGAGCCCTT	60.06	20	TTGTGACGTTTGCGATGATT	60.119	20	280	2707	2986	CGCCCATTATCATAGGCATT	59.779	20	TTGTGACGTTTGCGATGATT	60.119	20	229	2758	2986	CGCCCATTATCATAGGCATT	59.779	20	TTTGTGACGTTTGCGATGAT	60.119	20	230	2758	2987
TR6738_c0_g1	TTCGTACTAAGCCACATCGG	58.796	20	TCCATGCACATAATTTCCAAAA	60.185	22	180	345	524	TTCGTACTAAGCCACATCGGT	59.646	21	TCCATGCACATAATTTCCAAAA	60.185	22	180	345	524	CTAAGCCACATCGGTAGCAG	58.554	20	TCCATGCACATAATTTCCAAAA	60.185	22	174	351	524
TR50246_c1_g1	TTGACAGACAGAAAGGATCCAA	59.711	22	TCGGCTTCTGTCTCTGGATT	59.95	20	245	391	635	TGACAGACAGAAAGGATCCAA	58.272	21	TCGGCTTCTGTCTCTGGATT	59.95	20	244	392	635	TTGACAGACAGAAAGGATCCAA	59.711	22	ATTTCGGCTTCTGTCTCTGG	59.43	20	248	391	638
TR10380_c0_g1	AAGGTTTGCATGCCTTTCTG	60.249	20	GCTGTTAGGACTTTCGAGTGG	58.994	21	241	130	370	CAAGGTTTGCATGCCTTTCT	60.249	20	GCTGTTAGGACTTTCGAGTGG	58.994	21	242	129	370	AAGGTTTGCATGCCTTTCTG	60.249	20	GCTGTTAGGACTTTCGAGTGGT	59.816	22	241	130	370
TR23701_c1_g2	GAAGAGATTTTGCACGATACCA	59.229	22	TATCGCACTGTTTCAATCCG	59.688	20	269	3	271	GAAGAGATTTTGCACGATACCA	59.229	22	CTGTTTCAATCCGGGTGTTC	60.353	20	262	3	264	GAAGAGATTTTGCACGATACCA	59.229	22	TCCGGGTGTTCGTCTAACTT	59.592	20	253	3	255
TR23701_c1_g2	CACTGACCAGTGACCACTCA	58.154	20	TTGTGCAAATACCATTCAGCA	60.126	21	245	2990	3234	CACTGACCAGTGACCACTCA	58.154	20	TGTGCAAATACCATTCAGCA	58.703	20	244	2990	3233	GACCAGTGACCACTCATGTGAT	59.89	22	TTGTGCAAATACCATTCAGCA	60.126	21	241	2994	3234
TR34521_c0_g4	TGCACGTGTCATCTGTACCA	59.732	20	AAACATGTATGGCTAAAAAGGTAAAAA	59.695	27	229	851	1079	TGCACGTGTCATCTGTACCA	59.732	20	AAACATGTATGGCTAAAAAGGTAAAA	58.661	26	229	851	1079	TGCACGTGTCATCTGTACCA	59.732	20	AACATGTATGGCTAAAAAGGTAAAAA	58.661	26	228	851	1078
TR32248_c7_g4	TATGCGGCTGGGGATAATAA	60.262	20	TGCTGCATTGGTTCGTTAGA	60.401	20	191	133	323	GTACCCAACAAGTGCCCATT	59.717	20	TGCTGCATTGGTTCGTTAGA	60.401	20	268	56	323	AACTATCTCCCTCCTCCCCC	60.645	20	CTAATTTGGTGGCATTTGGG	60.181	20	214	206	419
TR51395_c0_g1	ACAGAACAGCTGATACGGCA	59.47	20	GGCCCCATCATGTGAATTAG	60.155	20	235	736	970	TGAAGATGCAACAGCAACAA	58.994	20	GGCCCCATCATGTGAATTAG	60.155	20	150	821	970	TTGAAGATGCAACAGCAACA	58.994	20	GGCCCCATCATGTGAATTAG	60.155	20	151	820	970
TR51395_c0_g1	TGAAGATGCAACAGCAACAA	58.994	20	TTCAGCAACACAACCACAAAG	59.79	21	280	821	1100	TGAAGATGCAACAGCAACAAG	60.042	21	TTCAGCAACACAACCACAAAG	59.79	21	280	821	1100	GCAGACTTTGCAACAACAACA	59.943	21	TTCAGCAACACAACCACAAAG	59.79	21	252	849	1100
TR51426_c0_g2	GCCAGGTTTGGAAGTCAGAG	59.844	20	CCAAAATTACCACGATCAACA	58.4	21	227	315	541	GCCAGGTTTGGAAGTCAGAG	59.844	20	ACCAAAATTACCACGATCAACA	59.248	22	228	315	542	GCCAGGTTTGGAAGTCAGAG	59.844	20	TGCCAGTTAATAAGCCACATTC	59.146	22	181	315	495
TR1723_c0_g1	GACTGTTGCTGGGAATCCAT	59.934	20	ACCATTTGCTCCCCATATCA	60.155	20	159	1636	1794	GACTGTTGCTGGGAATCCAT	59.934	20	GCTCCCCATATCATGTCCAC	60.166	20	152	1636	1787	TCTGGACTCCAAACACCCTC	60.088	20	ACCATTTGCTCCCCATATCA	60.155	20	264	1531	1794
TR48673_c0_g2	TTATCGGCACTTTGGTTTCC	59.938	20	CTCCAAGTTTCAACGACGTG	59.335	20	271	1058	1328	TTATCGGCACTTTGGTTTCC	59.938	20	CCAAGTTTCAACGACGTGAC	59.187	20	269	1058	1326	TTATCGGCACTTTGGTTTCC	59.938	20	GATAAAATACCCACCACGCC	59.162	20	170	1058	1227
TR25892_c11_g1	CTGATAACCAAGGCTTCACAGA	59.378	22	TCACCATTCAACAGGGAAAA	58.947	20	227	333	559	TGATAACCAAGGCTTCACAGA	58.365	21	TCACCATTCAACAGGGAAAA	58.947	20	226	334	559	TGATAACCAAGGCTTCACAGATT	60.014	23	TCACCATTCAACAGGGAAAA	58.947	20	226	334	559
TR25892_c11_g1	CCATCATATGGCTAAGCTTTTT	57.521	22	TGCAAATTTTATTTTTCGTCAA	57.49	22	242	1235	1476	CCATCATATGGCTAAGCTTTTT	57.521	22	GCAAATTTTATTTTTCGTCAACAA	59.475	24	241	1235	1475	AAACCATCATATGGCTAAGCTTTT	59.486	24	TGCAAATTTTATTTTTCGTCAA	57.49	22	245	1232	1476
TR9043_c2_g1	CCCAACCTGCATTCTGATTT	59.933	20	GGGTATGGTAATTGAAACCCA	58.544	21	209	367	575	CCCAACCTGCATTCTGATTT	59.933	20	AGGGTATGGTAATTGAAACCCA	59.48	22	210	367	576	GCTACCCAACCTGCATTCTG	60.657	20	GGGTATGGTAATTGAAACCCA	58.544	21	213	363	575
TR30838_c0_g1	ATTTTTACTTGCAAAAAGTTGGA	57.195	23	GCATCTCCGCAGAAAAAGAC	59.962	20	238	34	271	CATCTTACATTTCATTTCCTTCGT	58.633	24	TCTCCGCAGAAAAAGACAGC	60.657	20	265	4	268	ATTTTTACTTGCAAAAAGTTGGA	57.195	23	GCCATCTTCTTCCGATTGTC	59.635	20	258	34	291
TR11253_c0_g1	ATTGTTGTATGCCAGCTCCC	59.962	20	CACCGGAAGTAAAGGCTGAA	60.241	20	144	922	1065	ATTGTTGTATGCCAGCTCCC	59.962	20	CCGGAAGTAAAGGCTGAAGA	59.448	20	142	922	1063	ATGCCAGCTCCCAACATAAA	60.469	20	CACCGGAAGTAAAGGCTGAA	60.241	20	136	930	1065
TR28727_c0_g1	GAGCAGTTTGTTGGCTCCTC	59.997	20	GGGGAAGGCAAAATAACCAT	60.02	20	280	525	804	TTGACGAAAAAGGGGATTTG	59.91	20	GGGGAAGGCAAAATAACCAT	60.02	20	167	638	804	TTGACGAAAAAGGGGATTTG	59.91	20	CCAAGATTTATGCAGGGGAA	59.894	20	181	638	818
TR21537_c0_g1	TACATTCTGCGGACTGACCA	60.263	20	CGTGGGTGATCAGAATTTGT	58.415	20	226	335	560	TACATTCTGCGGACTGACCA	60.263	20	ACGTGGGTGATCAGAATTTGT	59.323	21	227	335	561	GGACTGACCACCAAGCTTAAA	59.228	21	TGTTCATGGAGTAAAGGGCA	59.123	20	278	345	622
TR55125_c0_g1	CCATATGAACTGACGCATCC	58.953	20	TCACCCATATCGACCCTGTT	60.195	20	117	505	621	CCATATGAACTGACGCATCC	58.953	20	CTCACCCATATCGACCCTGT	59.803	20	118	505	622	CCGGACTGAAAACAAAATCA	58.597	20	TCACCCATATCGACCCTGTT	60.195	20	252	370	621
TR45388_c0_g1	CCTTAGAACATGAGGGGCTG	59.688	20	GAGGGCTTATGCCAACGATA	60.06	20	264	194	457	CCTTAGAACATGAGGGGCTG	59.688	20	GAGATGAGGGCTTATGCCAA	60.177	20	269	194	462	CACCTTAGAACATGAGGGGC	59.55	20	GAGGGCTTATGCCAACGATA	60.06	20	266	192	457
TR2784_c2_g1	CCAACAAATAACAACTGGTTTGC	60.648	23	GTCCTTCTTGGTGCCATTGT	59.973	20	126	468	593	CCAACAAATAACAACTGGTTTGC	60.648	23	CAGTCCTTCTTGGTGCCATT	60.111	20	128	468	595	CCAACAAATAACAACTGGTTTGC	60.648	23	AGTCCTTCTTGGTGCCATTG	60.111	20	127	468	594
TR2784_c2_g1	ACAATGGCACCAAGAAGGAC	59.973	20	GCAACATACCAACGCTGAGA	59.871	20	155	574	728	AATGGCACCAAGAAGGACTG	60.111	20	GCAACATACCAACGCTGAGA	59.871	20	153	576	728	CAATGGCACCAAGAAGGACT	60.111	20	GCAACATACCAACGCTGAGA	59.871	20	154	575	728
TR45999_c0_g1	CCCCGTGTCAGTTTGGATAC	60.232	20	GAGGTTTCCCAGCAAGTCAA	60.232	20	182	2195	2376	CCCCGTGTCAGTTTGGATAC	60.232	20	TTGAGGTTTCCCAGCAAGTC	60.232	20	184	2195	2378	CCCCGTGTCAGTTTGGATAC	60.232	20	GATTGAGGTTTCCCAGCAAG	59.67	20	186	2195	2380
TR40244_c1_g2	AGCGGCGCTATACTGAACAT	59.895	20	AATGTCAACCATGCCAATCA	59.781	20	192	430	621	CGGCGCTATACTGAACATCA	59.856	20	AATGTCAACCATGCCAATCA	59.781	20	190	432	621	AGCCTGTTGTTTGGATACGG	59.993	20	GTCAAATGTCAACCATGCCA	60.376	20	268	358	625
TR45924_c0_g1	CCTGTGTGCTTGTTGCTCAT	59.905	20	TTTTTGCTTCCATGATTTGG	58.6	20	245	476	720	TGGCCTCATCTTGATTGTCA	60.201	20	TTTTTGCTTCCATGATTTGG	58.6	20	181	540	720	TATCCCTGTGTGCTTGTTGC	59.722	20	TTTTTGCTTCCATGATTTGG	58.6	20	249	472	720
TR4879_c0_g1	CCAATAAAAACCGGTGGACA	60.587	20	TCGCAGAGAAATTGGAGTGA	59.522	20	242	1352	1593	CCAATAAAAACCGGTGGACA	60.587	20	TGATTCGCAGAGAAATTGGA	59.35	20	246	1352	1597	CAAAAAGCCATGTTCTCCCT	59.17	20	TCGCAGAGAAATTGGAGTGA	59.522	20	186	1408	1593
TR13116_c0_g1	GTTTCGTCCAATCACAACCC	60.218	20	GTTGTCGGTTCAGTGGAGGT	60.009	20	165	665	829	GTTTCGTCCAATCACAACCC	60.218	20	TCATTGGCGTTGTTGACATT	59.972	20	128	665	792	ACAACTTTGGGTACGTTGGG	59.751	20	GTTGTCGGTTCAGTGGAGGT	60.009	20	259	571	829
TR54793_c0_g1	CACCATGGGCAGATAACTCA	59.522	20	AAATGATACAATGGCAGCCC	59.791	20	177	473	649	TGGAAAGAAGGCTGTGAAAGA	59.978	21	AAATGATACAATGGCAGCCC	59.791	20	152	498	649	TCTGGAAAGAAGGCTGTGAAA	59.978	21	AAATGATACAATGGCAGCCC	59.791	20	154	496	649
TR32836_c5_g2	ACAGCGGTTGAAATTTGGTC	59.978	20	ACCCATCGATCAACCCATAG	59.629	20	233	146	378	TTGGTCGGGGCAATAGTTAG	59.953	20	ACCCATCGATCAACCCATAG	59.629	20	219	160	378	TTGGTCGGGGCAATAGTTAG	59.953	20	CTGTAGATGCAACAGCCAGC	59.621	20	274	160	433
TR32836_c5_g2	CAATAGGTCCGTTCTTTGGC	59.569	20	TGGCTAACACCTGGAGGAAC	60.111	20	268	1253	1520	CAATAGGTCCGTTCTTTGGC	59.569	20	GTGGCTAACACCTGGAGGAA	60.111	20	269	1253	1521	CAATAGGTCCGTTCTTTGGC	59.569	20	TTTGGATGATGAAGCAGACG	59.799	20	170	1253	1422
TR39279_c1_g2	TGATTGCGAGTGACAAACTGA	60.443	21	GACCTGGCTGTTGTTGGTTT	60.012	20	260	403	662	TGATTGCGAGTGACAAACTG	58.409	20	GACCTGGCTGTTGTTGGTTT	60.012	20	260	403	662	CGGAAACTACTCGCATACCA	58.796	20	TATGACCTGGCTGTTGTTGG	59.566	20	166	500	665
TR31506_c0_g1	CAATGGATCTGACGTCATCG	60.072	20	CCTTCTGGTTGCTGTGGTTT	60.149	20	257	102	358	TCCTGATAGCGTAGCGGTTT	59.867	20	GTCCGTAGAGCACATTCCGT	60.142	20	166	6	171	CAATGGATCTGACGTCATCG	60.072	20	GCGATGTAACTGTATGGGGG	60.214	20	144	102	245
TR31506_c0_g1	ATTTCGTTTCGGCAAGATGA	60.585	20	GGCAAATATTTTTCAACCGC	59.438	20	243	2092	2334	TCTTGTATTTCGTTTCGGCA	59.301	20	GGCAAATATTTTTCAACCGC	59.438	20	249	2086	2334	TGTATTTCGTTTCGGCAAGA	59.301	20	GGCAAATATTTTTCAACCGC	59.438	20	246	2089	2334
TR4478_c0_g1	AAATGTCGCCAGCAAGAAAT	59.713	20	CACCGGTTAGCTTTTTGGAA	60.103	20	237	2080	2316	AAAATGTCGCCAGCAAGAAA	60.752	20	CACCGGTTAGCTTTTTGGAA	60.103	20	238	2079	2316	AAATGTCGCCAGCAAGAAAT	59.713	20	TCACCGGTTAGCTTTTTGGA	60.608	20	238	2080	2317
TR54521_c0_g1	GGCTATTGATGGTTGCCAGT	59.962	20	AGATCCTGATCAGAAGGCCC	60.563	20	101	1360	1460	TCGGGGAAGTTGGTAGAAAA	59.541	20	TCCTGATCAGAAGGCCCATA	60.56	20	253	1205	1457	TCGGGGAAGTTGGTAGAAAA	59.541	20	AGATCCTGATCAGAAGGCCC	60.563	20	256	1205	1460
TR7528_c0_g2	AGTCTGTTCCCCATCACTCG	60.112	20	AAGGAATGCAGAAAGGCAGA	59.955	20	253	1711	1963	TCCTGCTCTCATTTTCACCC	60.195	20	AAGGAATGCAGAAAGGCAGA	59.955	20	227	1737	1963	TGCTTCACTTTGTTGCTGCT	59.788	20	AAGGAATGCAGAAAGGCAGA	59.955	20	157	1807	1963
TR6913_c0_g1	CCTTATCTGGGTGAATGAAAGC	59.966	22	GAGGGTTGCATTTTATAGCCA	59.091	21	280	211	490	GCCTTATCTGGGTGAATGAAA	59.033	21	GGGTTGCATTTTATAGCCAA	57.662	20	279	210	488	GCCTTATCTGGGTGAATGAAA	59.033	21	AGGGTTGCATTTTATAGCCAA	58.642	21	280	210	489
TR9044_c0_g1	TTTGTTTGGCCAGTGAAAGTT	59.64	21	CCAGAGACCTGCTTCTCTCC	59.127	20	278	3826	4103	TTTGTTTGGCCAGTGAAAGTT	59.64	21	CCAGAGACCTGCTTCTCTCCT	60.14	21	278	3826	4103	TTTGTTTGGCCAGTGAAAGT	58.256	20	CCAGAGACCTGCTTCTCTCC	59.127	20	278	3826	4103
TR4812_c0_g1	ACCATAACGAAATGCAGAGG	57.698	20	TCCCTTGTAAATGGGAAAGAAA	59.817	22	143	1228	1370	CCATAACGAAATGCAGAGGT	57.698	20	TCCCTTGTAAATGGGAAAGAAA	59.817	22	142	1229	1370	ACCATAACGAAATGCAGAGGT	58.592	21	TCCCTTGTAAATGGGAAAGAAA	59.817	22	143	1228	1370
TR40411_c0_g1	TCTGAGAATGTGCAACCTGC	59.992	20	CAGAATCAGGCAGCACAGAA	60.136	20	148	56	203	TCTGAGAATGTGCAACCTGC	59.992	20	GAACAGCAGATTCAGCAGCA	60.296	20	121	56	176	TCTGAGAATGTGCAACCTGC	59.992	20	CAGCATCAGCAGTTACAGGC	59.621	20	208	56	263
TR3244_c1_g1	GACCGGGAGACAGTGAAAAA	60.088	20	ACCTGTGCGTACAAACTCCC	60.035	20	166	1328	1493	GACCGGGAGACAGTGAAAAA	60.088	20	TAGGACCCGCCATTCTGTAG	60.088	20	235	1328	1562	GACCGGGAGACAGTGAAAAA	60.088	20	TTCTGTAGTTTCGTTGGCCC	60.11	20	223	1328	1550
TR48614_c2_g2	TGTTGATCAGTTGTGGTGGAA	59.992	21	AAAAAGTCGCCAACAGAAAAA	58.909	21	204	1852	2055	TGATCAGTTGTGGTGGAATCA	59.951	21	AAAAAGTCGCCAACAGAAAAA	58.909	21	201	1855	2055	TGATCAGTTGTGGTGGAATCA	59.951	21	AAAAACAACAACTTCAGGCACA	59.693	22	259	1855	2113
TR48632_c1_g1	ACACCCTGTACCGTCGTCTC	60.033	20	TTCCTAGCATAGCTGCCGAT	59.967	20	214	2678	2891	AGAGGAGGAGGAAGCCAAAG	59.95	20	TTCCTAGCATAGCTGCCGAT	59.967	20	177	2715	2891	TCAGCAAAAGGTGACAGTGG	59.873	20	TTCCTAGCATAGCTGCCGAT	59.967	20	104	2788	2891
TR32847_c2_g1	TGTGAAAAGGCAGCGTAAGA	59.609	20	CTCGGAGGTTGTATGACCGT	59.989	20	245	1086	1330	TGTGAAAAGGCAGCGTAAGA	59.609	20	CGGAGGTTGTATGACCGTCT	59.989	20	243	1086	1328	TGTGAAAAGGCAGCGTAAGA	59.609	20	TCCTTGGTTTGTTTTCTCGG	60.081	20	260	1086	1345
TR32847_c2_g1	CTCCTCCAGCAAGAAACCAG	59.982	20	CTGGCATTGTGGTCATCATC	59.925	20	165	4197	4361	CTCCTCCAGCAAGAAACCAG	59.982	20	AGAAGATTTGGCATCACGCT	59.843	20	271	4197	4467	CTCCTCCAGCAAGAAACCAG	59.982	20	GAAGATTTGGCATCACGCTT	60.221	20	270	4197	4466
TR6573_c0_g1	CAGGAGGGCTTATGCAATTT	59.182	20	CACAACAGGATTTTAACAAAGGC	59.926	23	258	135	392	ACAGGAGGGCTTATGCAATTT	59.979	21	CACAACAGGATTTTAACAAAGGC	59.926	23	259	134	392	TCTTTGGTACAGGAGGGCTT	58.789	20	CACAACAGGATTTTAACAAAGGC	59.926	23	267	126	392
TR10219_c0_g1	TGTCACGAGACCAGGAACAG	59.864	20	GTGCCAGGTCAATGTTGTTG	60.008	20	121	934	1054	GACGCCCAAGAAGACAGTTC	59.851	20	GTGCCAGGTCAATGTTGTTG	60.008	20	219	836	1054	TTCAGTACCACGGATGAGCA	60.263	20	GTGCCAGGTCAATGTTGTTG	60.008	20	202	853	1054
TR33463_c0_g1	TTCATTCCGGACCAAAACAT	60.17	20	ACTCATTGCCCTCTTTGGTG	60.111	20	179	682	860	AACACACTTCATTCCGGACC	59.827	20	ACTCATTGCCCTCTTTGGTG	60.111	20	186	675	860	GCAAATCAGTCAAGGCTTCC	59.82	20	ACTCATTGCCCTCTTTGGTG	60.111	20	261	600	860
TR17330_c0_g1	TGATGATGACGATGCTGATG	59.146	20	GATTTCCCGCAGAGAGAGTG	59.95	20	110	716	825	TGATGATGACGATGCTGATG	59.146	20	ATTTCCCGCAGAGAGAGTGA	59.95	20	109	716	824	TGATGATGATGACGATGCTG	59.146	20	GATTTCCCGCAGAGAGAGTG	59.95	20	113	713	825
TR48144_c0_g1	AGTGAGGAGGAACACCATGA	58.052	20	TCAAACGTCTTCCCACCTTC	60.088	20	176	11	186	AGTGAGGAGGAACACCATGA	58.052	20	CTCTGCTTGCTTCAGCCTTT	59.898	20	231	11	241	AGTGAGGAGGAACACCATGA	58.052	20	CTGCTTGCTTCAGCCTTTCT	59.898	20	229	11	239
TR48144_c0_g1	CAAGCCAAGCACAGAGAACA	60.175	20	TCATCCTCATCAGCATCACTG	59.803	21	278	917	1194	CAAGCCAAGCACAGAGAACA	60.175	20	ATCCTCATCAGCATCACTGC	58.779	20	276	917	1192	GCAACAGGCAAATGTTCGTA	59.735	20	TCATCCTCATCAGCATCACTG	59.803	21	252	943	1194
TR29840_c4_g1	AAAGCGTTCAAAGGCAAAGA	59.996	20	CAGCATAGCCAAACAGTGGA	59.864	20	279	92	370	CAGCAAGCATGATCCAGTGT	59.862	20	TTTTGCCTGTAAATCCCAGC	60.074	20	214	173	386	CACAGCAAGCATGATCCAGT	59.862	20	TTTTGCCTGTAAATCCCAGC	60.074	20	216	171	386
TR30107_c8_g2	AAGATCCTGGAATCGTCCCT	59.896	20	CGAGGACGGAAAAATACGAA	60.067	20	257	23	279	GACCAGGGTCATTTTTCCAA	59.767	20	CGAGGACGGAAAAATACGAA	60.067	20	157	123	279	ACATGGGTGAAAGTTTTCCG	59.83	20	CTGGCCAGTGTAAACCGACT	60.171	20	260	71	330
TR48809_c0_g2	ATTGCAATGGCTTTCTGGAT	59.533	20	GCCAGCAAGAAGGATGAAAG	59.955	20	271	567	837	ATTGCAATGGCTTTCTGGAT	59.533	20	CCAGCAAGAAGGATGAAAGC	59.955	20	270	567	836	CAAACTGAGCAATTGGGGTT	59.971	20	CACGTCCTGGGTTATCATCA	59.369	20	243	485	727
TR32810_c0_g1	GGATGAGCAGGCTTATCTGG	59.797	20	TCGGTAAATGAATCATCGGA	58.917	20	227	318	544	GGATGAGCAGGCTTATCTGG	59.797	20	TCGGAATAAAAACACCCACA	58.866	20	212	318	529	GGATGAGCAGGCTTATCTGG	59.797	20	TCATCGGAATAAAAACACCCA	60.174	21	215	318	532
TR1492_c0_g1	GCCGGTTATTTCTTTCAACA	57.754	20	TGGTAACGGTGGATACCTGA	58.847	20	247	574	820	AGCCGGTTATTTCTTTCAACA	58.753	21	TGGTAACGGTGGATACCTGA	58.847	20	248	573	820	GCCGGTTATTTCTTTCAACAG	58.753	21	TGGTAACGGTGGATACCTGA	58.847	20	247	574	820
TR14247_c0_g1	GCACGAGAGGTGTCACAGAA	60.03	20	CGCCAAAATAAACGTGATCC	60.323	20	275	1031	1305	ATGCACGAGAGGTGTCACAG	59.897	20	CGCCAAAATAAACGTGATCC	60.323	20	277	1029	1305	TTGCAGATGAAATTTGGTGC	59.67	20	ATCAAGCATACATGTGGGGG	60.603	20	248	1224	1471
TR3270_c2_g3	GCACATTGGTGCTGTCTGAT	59.714	20	GGGAACAGAGCAGATCCTGA	60.349	20	142	4	145	GCACATTGGTGCTGTCTGAT	59.714	20	ATAGGCTTTAACGCATGGGA	59.569	20	158	4	161	GCACATTGGTGCTGTCTGAT	59.714	20	TAGGCTTTAACGCATGGGAA	60.58	20	157	4	160
TR57729_c0_g1	AGGTGTTCGTGTCCCAAGTC	60.009	20	CGCAGTCATGCATGGAAAT	60.647	19	221	1020	1240	GAGGTGTTCGTGTCCCAAGT	60.009	20	CGCAGTCATGCATGGAAAT	60.647	19	222	1019	1240	TGAAGTGACAGGCGCTAGAA	59.74	20	CGCAGTCATGCATGGAAAT	60.647	19	269	972	1240
TR8178_c1_g1	TTCAGTAGCACATTTCCAATTCA	59.639	23	CAAGCACAGCCTTTGTCTGA	60.175	20	231	240	470	TTCAGTAGCACATTTCCAATTCA	59.639	23	CAATAGCCAAGCACAGCCTT	60.407	20	238	240	477	TCAGTAGCACATTTCCAATTCA	58.294	22	CAAGCACAGCCTTTGTCTGA	60.175	20	230	241	470
TR57388_c2_g4	TGCAAGACTGTGCTACAATGC	60.073	21	GCCACATGAACCCATCAACT	60.79	20	268	1726	1993	TGCAAGACTGTGCTACAATGC	60.073	21	TTTTCTTGCCACATGAACCC	60.874	20	275	1726	2000	TGCAAGACTGTGCTACAATGC	60.073	21	CTTGCCACATGAACCCATC	59.909	19	271	1726	1996
TR41233_c0_g1	GCACGATGGTTTTGGCTTAT	59.967	20	CAATGCCCTTGAGATGAGGT	60.073	20	273	893	1165	CCAAAATTGCTGATGGTGTG	59.964	20	CAATGCCCTTGAGATGAGGT	60.073	20	200	966	1165	CTCATTGACCAGGCTAAGGC	59.836	20	CAATGCCCTTGAGATGAGGT	60.073	20	162	1004	1165
TR41066_c0_g1	GGACTAAGGGAATTATCTTCGGA	59.827	23	TACAGCCCTGGAATGATGTG	59.522	20	249	1022	1270	GGACTAAGGGAATTATCTTCGGA	59.827	23	GGAATGATGTGCAGCAAAAG	59.276	20	240	1022	1261	GGACTAAGGGAATTATCTTCGGA	59.827	23	GGAATGATGTGCAGCAAAAGT	60.133	21	240	1022	1261
TR28949_c0_g3	TGGGAAGGAGAGTCAAATGG	60.042	20	TGACAAATGAATCTGTTTGTAGGAA	59.926	25	210	2099	2308	TGGGAAGGAGAGTCAAATGG	60.042	20	TTGACAAATGAATCTGTTTGTAGGA	59.926	25	211	2099	2309	CCATGGGAAGGAGAGTCAAA	60.042	20	TGACAAATGAATCTGTTTGTAGGAA	59.926	25	213	2096	2308
TR15729_c1_g4	TGGCTTTTGCTAACAGTGACA	59.521	21	AACTGCACCAAGGCTACATTC	59.256	21	207	458	664	TGGCTTTTGCTAACAGTGACA	59.521	21	AAATGTAAACTGCACCAAGGC	59.148	21	214	458	671	TGGCTTTTGCTAACAGTGACA	59.521	21	CTGCACCAAGGCTACATTCT	57.98	20	205	458	662
TR26662_c3_g1	CCCCACCTATCAAGCAAGAA	60.066	20	CGGAGTGCCTGATTTGTCTT	60.255	20	104	106	209	CCCCACCTATCAAGCAAGAA	60.066	20	GAAGTGACGGAGTGCCTGAT	60.269	20	111	106	216	CCCCACCTATCAAGCAAGAA	60.066	20	ACGGAGTGCCTGATTTGTCT	59.727	20	105	106	210
TR33423_c0_g1	AACAAAATTGACCTGGCACC	59.836	20	AAAATTTCGGACCGGTTCTT	59.814	20	234	46	279	AACAAAATTGACCTGGCACC	59.836	20	ATTTCGGACCGGTTCTTACC	60.187	20	231	46	276	CAAAATTGACCTGGCACCTC	60.495	20	AAAATTTCGGACCGGTTCTT	59.814	20	232	48	279
TR33473_c10_g3	CATTGATGGCTTTGCTCAGA	59.948	20	GCTAGTATCCATTTCGGCCA	60.06	20	195	565	759	GGAAGTTGGTCGTCCAAAGA	60.088	20	GCTAGTATCCATTTCGGCCA	60.06	20	150	610	759	CATTGATGGCTTTGCTCAGA	59.948	20	TTGGAGACCAGCCTCAAATC	60.195	20	275	565	839
TR53015_c0_g1	AGCACCAACTTGATTTCTGGA	59.726	21	GGCGAATAGTGCACTTCACA	59.871	20	240	97	336	GCACCAACTTGATTTCTGGA	58.697	20	GGCGAATAGTGCACTTCACA	59.871	20	239	98	336	TTTCTGGAAATTTTGTTCGGA	59.551	21	GGCGAATAGTGCACTTCACA	59.871	20	227	110	336
TR53015_c0_g1	CCAGGTCGGTCATAAATTGG	60.184	20	TTGTTTGGGAAAGCATTAAGAA	58.783	22	278	945	1222	CCAGGTCGGTCATAAATTGG	60.184	20	TTGTTTGGGAAAGCATTAAGA	57.446	21	278	945	1222	CCAGGTCGGTCATAAATTGG	60.184	20	TGTTTGGGAAAGCATTAAGAA	57.446	21	277	945	1221
TR8173_c0_g1	CACTCCAGTTTAGCCTGCAA	59.072	20	TGCATAAAATCTTCCAAAACGA	59.603	22	250	477	726	TGCACTCCAGTTTAGCCTGC	61.513	20	TGCATAAAATCTTCCAAAACGA	59.603	22	252	475	726	CACTCCAGTTTAGCCTGCAA	59.072	20	TCTTCCAAAACGAAAGTCAGAA	58.994	22	241	477	717
TR12465_c0_g1	CAAACCATAGTCCAACCGCT	59.993	20	GGCCAGGGCTAACAAAAGAC	60.987	20	167	944	1110	AAACCATAGTCCAACCGCTG	59.993	20	GGCCAGGGCTAACAAAAGAC	60.987	20	166	945	1110	ACAAGCCAACACCTCCAAAC	60.012	20	GGCCAGGGCTAACAAAAGAC	60.987	20	182	929	1110
TR46218_c1_g1	TCAGCAGCATCAGTTTGGTC	59.992	20	GGAACAGCAGCAGGAAGAAG	60.134	20	195	4255	4449	TCAGCAGCATCAGTTTGGTC	59.992	20	AGGAACAGCAGCAGGAAGAA	60.134	20	196	4255	4450	TTTCAGCAGCATCAGTTTGG	59.988	20	GGAACAGCAGCAGGAAGAAG	60.134	20	197	4253	4449
TR23261_c3_g1	AATGCCCGCTAACAAAGAAC	59.229	20	CAACCAAGCTCACACCAAGA	59.873	20	211	494	704	AATGCCCGCTAACAAAGAAC	59.229	20	TCAACCAAGCTCACACCAAG	59.873	20	212	494	705	AATGCCCGCTAACAAAGAAC	59.229	20	AGGTCAACCAAGCTCACACC	60.159	20	215	494	708
TR40380_c1_g1	TTAGGCTGGTTTCCATTTGC	60.074	20	TGCCCAATTTTGATTTAAGAAA	58.652	22	255	1763	2017	GGGATCTTAGGCTGGTTTCC	59.903	20	TGCCCAATTTTGATTTAAGAAA	58.652	22	261	1757	2017	GCTGGTTTCCATTTGCAGTT	60.118	20	TGCCCAATTTTGATTTAAGAAA	58.652	22	251	1767	2017
TR2169_c0_g1	CGAGTCAAAGTCTTGCCCAT	60.255	20	ATGCCAAAAGCAAAGCAAGT	59.889	20	243	987	1229	CGAGTCAAAGTCTTGCCCAT	60.255	20	GAGACACCAAGGGAAAGCAG	59.844	20	180	987	1166	CAAAGTCTTGCCCATCATCA	59.648	20	ATGCCAAAAGCAAAGCAAGT	59.889	20	238	992	1229
TR48720_c16_g1	GCAGTGGGATATGGCTGTTT	59.962	20	ATCGCGTTACAATACTCCGC	60.124	20	135	905	1039	GCAGTGGGATATGGCTGTTT	59.962	20	CGCGTTACAATACTCCGCTT	60.285	20	133	905	1037	GCAGTGGGATATGGCTGTTT	59.962	20	CCAATCAGATCGCGTTACAA	59.688	20	143	905	1047
TR53995_c1_g1	TCATTACACTATGTGGGCATTT	57.076	22	CATTGCACGTGTCATTGGTA	58.994	20	253	341	593	TCATTACACTATGTGGGCATTT	57.076	22	TTGCACGTGTCATTGGTAAAA	60.022	21	251	341	591	TCATTACACTATGTGGGCATTT	57.076	22	TGCACGTGTCATTGGTAAAAA	60.022	21	250	341	590
TR58989_c0_g2	AGTTTCACCTCCGGTCTCCT	60.111	20	TCTTTGCCGACATTTGACTG	59.84	20	200	155	354	AGTTTCACCTCCGGTCTCCT	60.111	20	GTCCATAATCGCTCCTCGAA	60.177	20	168	155	322	TCAGTTTCACCTCCGGTCTC	60.238	20	TCTTTGCCGACATTTGACTG	59.84	20	202	153	354
TR24910_c0_g1	TGTTTTCGAGACACTGACGC	60.032	20	TTTTTCGTTTTCGTTGCCTT	59.736	20	125	818	942	TGTTTTCGAGACACTGACGC	60.032	20	GTTTTTCGTTTTCGTTGCCT	59.248	20	126	818	943	TGTTTTCGAGACACTGACGC	60.032	20	TGTTTTTCGTTTTCGTTGCC	61.008	20	127	818	944
TR37647_c0_g1	CCGTGATAGCGGAAAGTTGT	60.132	20	TGTATGGAAGTGAACACTTATTCTGA	59.162	26	128	1227	1354	TATTTGAAAAATTCCCGCCA	60.254	20	TGTATGGAAGTGAACACTTATTCTGA	59.162	26	231	1124	1354	GATGTGAATTTCCGGACGAC	60.326	20	TGTATGGAAGTGAACACTTATTCTGA	59.162	26	176	1179	1354
TR26514_c0_g1	TTAGCAATAAGCCGGACCTG	60.223	20	GAAGTGGCAATTGCGTTAGA	58.92	20	244	1146	1389	TAGCAATAAGCCGGACCTGT	59.73	20	GAAGTGGCAATTGCGTTAGA	58.92	20	243	1147	1389	GCATTAGCAATAAGCCGGAC	59.71	20	GAAGTGGCAATTGCGTTAGA	58.92	20	247	1143	1389
TR9944_c1_g1	TGTGTCATCCGGAACATCAT	59.769	20	GCCTGAAACTTGGAGTAGCTG	59.135	21	202	242	443	TGTCATCCGGAACATCATTG	60.33	20	GCCTGAAACTTGGAGTAGCTG	59.135	21	200	244	443	TCTGGAAGCCTAGGTCAAGC	59.574	20	GCCTGAAACTTGGAGTAGCTG	59.135	21	231	213	443
TR21712_c0_g1	GAACATGTAAGCTCCGGGAA	60.074	20	GGGGCTAGTGTGTTGTTGGT	59.891	20	233	20	252	GAACATGTAAGCTCCGGGAA	60.074	20	GTTGGGGGCTAGTGTGTTGT	59.891	20	237	20	256	GAACATGTAAGCTCCGGGAA	60.074	20	AATTGTTGGGGGCTAGTGTG	59.853	20	241	20	260
TR23078_c0_g1	GGCTGATGGACATACTGGCT	60.104	20	GGTGCTACTGCTGCTGATGA	60.168	20	223	1529	1751	AGGCTGATGGACATACTGGC	60.104	20	GGTGCTACTGCTGCTGATGA	60.168	20	224	1528	1751	CCACACGGACAGACAAACAG	60.194	20	GGTGCTACTGCTGCTGATGA	60.168	20	245	1507	1751
TR3291_c0_g1	AAACTCTGTCGTGCCATGAA	59.293	20	AGTTCTTGTAAAGGTGGCGA	57.483	20	250	3476	3725	ACTCTGTCGTGCCATGAAAA	59.293	20	AGTTCTTGTAAAGGTGGCGA	57.483	20	248	3478	3725	TCTGTCGTGCCATGAAAAAT	59.127	20	AGTTCTTGTAAAGGTGGCGA	57.483	20	246	3480	3725
TR30081_c0_g1	CTGGGCGTATGACCTGAACT	60.134	20	GAGAACACACCACGAGCAGA	60.03	20	229	2279	2507	TAGAACAGCTCCCCTCATCG	60.353	20	GAGAACACACCACGAGCAGA	60.03	20	257	2251	2507	CTGGGCGTATGACCTGAACT	60.134	20	CCGCATAGACAACAACCTCA	59.716	20	196	2279	2474
TR44519_c0_g1	AAATGGGATGTGAGGCTTTTT	59.828	21	GCAGGTTTCAATCAAACGGT	59.978	20	256	348	603	AAAAATGGGATGTGAGGCTTT	59.828	21	GCAGGTTTCAATCAAACGGT	59.978	20	258	346	603	AAAATGGGATGTGAGGCTTTT	59.828	21	GCAGGTTTCAATCAAACGGT	59.978	20	257	347	603
TR51444_c0_g1	TTTGATGCATGTGCCTTTTT	59.161	20	CGCCTGTACATGACTGTATTCAA	60.068	23	149	1895	2043	TTTTGATGCATGTGCCTTTT	59.161	20	CGCCTGTACATGACTGTATTCAA	60.068	23	150	1894	2043	TTTTGATGCATGTGCCTTTTT	60.482	21	CGCCTGTACATGACTGTATTCAA	60.068	23	150	1894	2043
TR28743_c0_g1	AAAAGGGTGGCAACAAAATG	59.839	20	TGTTTGATTGGGTGTTAACCTG	59.763	22	250	628	877	TGGAGTTTAAAAGGGTGGCA	60.472	20	TGTTTGATTGGGTGTTAACCTG	59.763	22	258	620	877	AAAAGGGTGGCAACAAAATG	59.839	20	TGACATTTTGAAAGAAGGCAA	58.4	21	219	628	846
TR39279_c4_g1	TTTTCTTGGACATGAGGTTGC	60.103	21	CGTCCACAGCTGTATGGTTG	60.175	20	278	176	453	TTTTCTTGGACATGAGGTTGC	60.103	21	CACGATTTATGGCCCTTGTT	59.823	20	185	176	360	TTTTCTTGGACATGAGGTTGC	60.103	21	TGGCCCTTGTTTTAATGGAA	60.294	20	176	176	351
TR23881_c6_g2	ATCCTCCGATCTCATCATCG	59.995	20	AGCAGCAGCATTGTCAGTGT	59.654	20	278	2220	2497	CGGCTAGGTCATGTTTCCAT	59.955	20	AGCAGCAGCATTGTCAGTGT	59.654	20	146	2352	2497	TCCTAACTGCCTCTCCCTGA	59.943	20	AGCAGCAGCATTGTCAGTGT	59.654	20	184	2314	2497
TR51500_c0_g1	CCTGGTTGCGTAACGAAGTA	58.845	20	ACCAGCTCCCAGAGTGTTGT	59.756	20	112	319	430	GGATTAGAAAGAAAGGCGGAA	59.688	21	ACCAGCTCCCAGAGTGTTGT	59.756	20	232	199	430	CCTGGTTGCGTAACGAAGTA	58.845	20	CTGACCAGCTCCCAGAGTGT	60.458	20	115	319	433
TR23917_c1_g1	AATTCACCAGCATTTGGGAC	59.797	20	CATTTAGGCCACAATTGGGTA	59.707	21	270	1113	1382	AATTCACCAGCATTTGGGAC	59.797	20	TGATCAGTCACATTTAGGCCA	59.138	21	280	1113	1392	GCATTTGGGACAGGTGTTGT	60.823	20	CATTTAGGCCACAATTGGGTA	59.707	21	261	1122	1382
TR1534_c0_g1	GAATAGCACACCGTTCCGTT	60	20	CCGTTTACGTCGGACTGTTT	60.03	20	170	670	839	CGTTCCGTTACATGTTGTGC	60.035	20	CCGTTTACGTCGGACTGTTT	60.03	20	159	681	839	CCGTTCCGTTACATGTTGTG	59.881	20	CCGTTTACGTCGGACTGTTT	60.03	20	160	680	839
TR35280_c6_g1	TGCAATATTTGAACTACCAAGGG	60.238	23	TCAGAGATGTTTCAGAATTGGG	59.17	22	219	2952	3170	CAATATTTGAACTACCAAGGGGA	59.277	23	TCAGAGATGTTTCAGAATTGGG	59.17	22	217	2954	3170	GCAATATTTGAACTACCAAGGGG	60.898	23	TCAGAGATGTTTCAGAATTGGG	59.17	22	218	2953	3170
TR41540_c2_g1	TTGGGTGTGAGTTTGTTCCA	59.976	20	CAGCAAGCACTGTCAACACA	59.642	20	126	1663	1788	GGATGTAATGTGGCTGCTCC	60.492	20	TGTCACTGCCAAATCAGAGC	59.992	20	126	1626	1751	AGTTTGTTCCATCAGGGGTG	59.82	20	CAGCAAGCACTGTCAACACA	59.642	20	117	1672	1788
TR11248_c0_g1	AGTGGCTGTGGTCACTGATG	59.738	20	ATCCTCATCCACCGTCTCAC	59.928	20	139	1047	1185	ATGGAATGGGTTGTCTTGGA	60.173	20	CCATCATCAGCAGCATCAGT	59.819	20	101	1108	1208	ATGGAATGGGTTGTCTTGGA	60.173	20	TCACCAACTCCATCATCAGC	59.637	20	110	1108	1217
TR38783_c0_g1	CCCCAACCTACCATCATGTC	60.05	20	TGACATACCTTGCTGTTGGAG	58.787	21	166	318	483	TCCCCAACCTACCATCATGT	60.05	20	TGACATACCTTGCTGTTGGAG	58.787	21	167	317	483	TCCCCAACCTACCATCATGT	60.05	20	CCAACCATTTATGACTTGTGGA	59.724	22	142	317	458
TR54418_c0_g1	TGCTGTTCACTATAACTGTGACTGA	59.032	25	AGGAACCACTCTGGGTAGCA	59.721	20	225	10	234	TGCTGTTCACTATAACTGTGACTGA	59.032	25	CAGGAACCACTCTGGGTAGC	59.721	20	226	10	235	TGCTGTTCACTATAACTGTGACTGA	59.032	25	GGAACCACTCTGGGTAGCAG	59.721	20	224	10	233
TR25514_c0_g2	CCAATCGTCTGACAAAGCAA	59.84	20	GCACAGATGTGCTGGTTGAT	59.714	20	254	3939	4192	CCAATCGTCTGACAAAGCAA	59.84	20	GATGTGCTGGTTGATCTGGA	59.637	20	249	3939	4187	AGCCAATCGTCTGACAAAGC	60.406	20	GCACAGATGTGCTGGTTGAT	59.714	20	256	3937	4192
TR44879_c0_g1	ATGCAGGAGAACCCTGCTTA	59.836	20	AAGGCAATGCTTCGCTAAAA	59.985	20	238	692	929	ATGCAGGAGAACCCTGCTTA	59.836	20	ACGAGGAAGTTTCAAGGCAA	59.853	20	251	692	942	CCCTGCTTAAAAACCACCAC	59.471	20	AAGGCAATGCTTCGCTAAAA	59.985	20	227	703	929
TR42136_c0_g1	TCGTGATCTTTCCGTAAGGC	60.214	20	GTTGACAAACTGTAGCCGCA	59.911	20	280	2377	2656	TCGTGATCTTTCCGTAAGGC	60.214	20	TTGACAAACTGTAGCCGCAT	59.347	20	279	2377	2655	TCGTGATCTTTCCGTAAGGC	60.214	20	ATTGCAATCTCAGGCAATGG	61.003	20	177	2377	2553
TR25472_c2_g1	CCAGGTTGGAGACTTGGAGT	59.149	20	TGCAGCACAATTTTCTGGTT	59.322	20	244	2242	2485	AAGCTTACCCAGGTTGGAGA	58.789	20	TGCAGCACAATTTTCTGGTT	59.322	20	252	2234	2485	CCAGGTTGGAGACTTGGAGT	59.149	20	TACTGACCCAGTTTTGCAGC	58.926	20	258	2242	2499
TR39456_c0_g1	TGGATCCAATCAAAGGTGTG	59.343	20	TGTTCCTGTGAATTTCCAGATG	59.971	22	106	767	872	TATCGGCACAGAAAATTCCC	59.901	20	AGGGGAAAACATGTTGAAGA	57.083	20	271	740	1010	GGATCCAATCAAAGGTGTGAA	59.782	21	TGTTCCTGTGAATTTCCAGATG	59.971	22	105	768	872
TR20815_c1_g1	TTTTCCAGCCAATATGACCA	58.965	20	AGAAGCGACCTTCGTTTCAA	59.993	20	258	976	1233	TTTTCCAGCCAATATGACCA	58.965	20	GTTGCTGCACCTACTGACGA	60.056	20	208	976	1183	TTTTCCAGCCAATATGACCA	58.965	20	TTGCTGCACCTACTGACGAC	60.056	20	207	976	1182
TR35272_c1_g1	GATCCTGATCAGATGTGCCA	59.591	20	TGCCAGAGAGTCCTGGTTTT	59.844	20	175	66	240	GATCCTGATCAGATGTGCCA	59.591	20	TTGCCAGAGAGTCCTGGTTT	59.844	20	176	66	241	GATCCTGATCAGATGTGCCA	59.591	20	GCAAGTTGCCAGAGAGTCCT	59.604	20	181	66	246
TR32183_c0_g1	ATCTCGGCTGTCAGTTCTGG	60.408	20	GAAAGCAGGATGAGGCTGAC	59.957	20	157	1215	1371	ATCTCGGCTGTCAGTTCTGG	60.408	20	CCTTTCGGAAAACTGGATCA	60.044	20	270	1215	1484	ATCTCGGCTGTCAGTTCTGG	60.408	20	GAGAAAGCAGGATGAGGCTG	60.096	20	159	1215	1373
TR3300_c1_g5	TTGCATCTTGATTTGACCGA	60.197	20	CTGTCGTCACATCTGCTTCG	60.616	20	239	880	1118	TACAGTTGAATGCAGCCTCG	60.011	20	GGCGTTTTCAACTGACTTGC	60.817	20	213	762	974	TTGCATCTTGATTTGACCGA	60.197	20	TCGGTGACATACGGCTAAGA	59.297	20	222	880	1101
TR9786_c1_g1	CCTGATGCCGAACGTTTAAT	59.96	20	GGCAACTTGAAAACCCAGAA	60.088	20	155	675	829	TGATGCCGAATACCTGTTGA	60.073	20	GGCAACTTGAAAACCCAGAA	60.088	20	232	598	829	TATCGAAAACTGTGCCATGC	59.694	20	GGCAACTTGAAAACCCAGAA	60.088	20	263	567	829
TR55356_c0_g1	CAACTCCAGCGATCTTGACA	59.984	20	ATCACGTGCACACCTGAAAC	59.603	20	277	992	1268	ATTTAGCTAACCGGAACCCC	59.333	20	TGTCAAGATCGCTGGAGTTG	59.984	20	170	1119	1288	GCCAATTACGCGCTACCTAT	59.261	20	TGTCAAGATCGCTGGAGTTG	59.984	20	196	1093	1288
TR57438_c9_g1	CACGTGCAAATAGGAAGCAA	59.872	20	TGTTCTTCCACGCATATCCA	60.073	20	198	17	214	CACGTGCAAATAGGAAGCAA	59.872	20	AATAGCCCCAGACTGGCTTT	60.096	20	253	17	269	CACGTGCAAATAGGAAGCAA	59.872	20	GGACAGCTTGGGCATCTAAA	60.214	20	159	17	175
TR19622_c0_g1	CATGTCACTGTGCAGTATGTCAG	59.3	23	GACTTGTGTCAATTGCCTTTCA	60.154	22	257	877	1133	CATGTCACTGTGCAGTATGTCAG	59.3	23	CTTGTGTCAATTGCCTTTCAA	58.808	21	255	877	1131	CATGTCACTGTGCAGTATGTCAG	59.3	23	TTGTGTCAATTGCCTTTCAA	57.733	20	254	877	1130
TR3871_c0_g1	CGCCACCTGTAATGTTTTCA	59.585	20	TTTTGAAACGGGTCAATGTG	59.415	20	259	1194	1452	TGTATCCGGCGATTAACTCA	59.136	20	TTTTGAAACGGGTCAATGTG	59.415	20	181	1272	1452	CGCCACCTGTAATGTTTTCA	59.585	20	TGAAACGGGTCAATGTGGTT	61.196	20	256	1194	1449
TR36800_c0_g1	CAGTTCATTTTGCCTTGCCT	60.249	20	CTCAATGCCCCATTTACCAC	60.192	20	177	995	1171	CAGTTCATTTTGCCTTGCCT	60.249	20	ACTCAATGCCCCATTTACCA	60.192	20	178	995	1172	CAGTTCATTTTGCCTTGCCT	60.249	20	CACTCAATGCCCCATTTACC	60.192	20	179	995	1173
TR41554_c9_g1	GCCTAGGAAATAACGGCACA	60.096	20	GTCGTGCCAGTTTGGAGATT	60.119	20	220	132	351	TGCCTAGGAAATAACGGCAC	60.096	20	GTCGTGCCAGTTTGGAGATT	60.119	20	221	131	351	CCAGATCAGCCTGCACATTA	59.823	20	GTCGTGCCAGTTTGGAGATT	60.119	20	269	83	351
TR41554_c9_g1	CAATGTGGCAACCAAAACAG	60.004	20	CGCATTGAATCTTCCATTTGT	59.952	21	166	1426	1591	CTGCTAAAGCAATGTGGCAA	60.014	20	CGCATTGAATCTTCCATTTGT	59.952	21	175	1417	1591	TAAAGCAATGTGGCAACCAA	60.111	20	CGCATTGAATCTTCCATTTGT	59.952	21	171	1421	1591
TR11324_c1_g1	ACCTTCAGCCCTGCTCTACA	60.012	20	CCCATGGGATATGGCAGTTA	60.544	20	149	22	170	ACCTTCAGCCCTGCTCTACA	60.012	20	TTCATGTGCAAACAGTGTGG	59.137	20	129	22	150	ACCTTCAGCCCTGCTCTACA	60.012	20	GTGCAAACAGTGTGGACCC	59.996	19	124	22	145
TR40332_c1_g1	GTTCCCCATACTGTGGCCTA	59.813	20	CGTGGACATTGTGATTCCTG	59.96	20	277	1340	1616	GTGGCCTAGCAACACGACTT	60.321	20	CGTGGACATTGTGATTCCTG	59.96	20	265	1352	1616	GTTCCCCATACTGTGGCCTA	59.813	20	AATGCCTCTCTGAAAGGTGC	59.434	20	150	1340	1489
TR18762_c1_g1	ACAAGGTCGTTAGGTGGGTG	59.884	20	GCTCTGCACAGACAACCAGT	59.051	20	130	122	251	TAGGTGGGTGGTTTAGTGCC	59.853	20	GCTCTGCACAGACAACCAGT	59.051	20	120	132	251	ACAAGGTCGTTAGGTGGGTG	59.884	20	AACGTTTAGGAAAACATGGGG	60.095	21	163	122	284
TR17322_c4_g2	GACCGTCTGTGTAACTGGGG	60.422	20	TGACGATTCATGCAAAATTGA	60.066	21	248	2019	2266	ATAAAACAAGCGATTGGGCA	60.456	20	TGACGATTCATGCAAAATTGA	60.066	21	270	1997	2266	AATAAAACAAGCGATTGGGC	59.081	20	TGACGATTCATGCAAAATTGA	60.066	21	271	1996	2266
TR5260_c1_g1	GCCATTTTCCGCATTAAAAA	59.913	20	AGGTTACAGCTGCGCTCAAT	60.044	20	161	9	169	GCCATTTTCCGCATTAAAAA	59.913	20	TGTTTCAGGTTACAGCTGCG	60.05	20	167	9	175	GCCATTTTCCGCATTAAAAA	59.913	20	CGCTCAATGCAAACTGTGTT	59.911	20	149	9	157
TR5260_c1_g1	TGGTTATACAGGCTCGCTCA	59.444	20	CGTCACCCCTGGATTTTAGA	59.926	20	236	3494	3729	TGGTTATACAGGCTCGCTCA	59.444	20	GAACATTTTCACGTCACCCC	60.218	20	247	3494	3740	TGGTTATACAGGCTCGCTCA	59.444	20	TGAACATTTTCACGTCACCC	59.394	20	248	3494	3741
TR26016_c1_g1	ATGGTTACAAGATGCTGCCC	59.962	20	AGGCCAAACGGTAGAACAAA	59.609	20	226	1512	1737	GCTGCCAGAAATGAGAAAGG	59.955	20	AGGCCAAACGGTAGAACAAA	59.609	20	270	1468	1737	ATGGTTACAAGATGCTGCCC	59.962	20	GGCCAAACGGTAGAACAAAC	59.476	20	225	1512	1736
TR6619_c0_g1	TCTTTTTATTTTTATTCGAGCTATCG	58.642	26	ATTACGCAACGACCGTAACC	59.889	20	199	22	220	TCTTTTTATTTTTATTCGAGCTATCGT	59.285	27	ATTACGCAACGACCGTAACC	59.889	20	199	22	220	CTTTTTATTTTTATTCGAGCTATCG	57.189	25	ATTACGCAACGACCGTAACC	59.889	20	198	23	220
TR48811_c0_g2	ATGTTGTGAGGAGACAGGGG	59.962	20	ACACACACATTTCCTTGGCA	60.008	20	215	427	641	ATGTTGTGAGGAGACAGGGG	59.962	20	TTCCTTGGCAGGAAAAGAGA	59.926	20	205	427	631	ATGTTGTGAGGAGACAGGGG	59.962	20	CACACACATTTCCTTGGCAG	60.152	20	214	427	640
TR25097_c0_g1	CATTCCCCTCTTTCCTTTCC	59.875	20	TACAAGTCATCCCCCTTCCA	60.309	20	170	1147	1316	CATTCCCCTCTTTCCTTTCC	59.875	20	AAGTCATCCCCCTTCCAAAT	59.629	20	167	1147	1313	TCCTCTCCTTCACAAGGGTG	60.229	20	TACAAGTCATCCCCCTTCCA	60.309	20	221	1096	1316
TR55070_c2_g1	TGCGTTTGATAATTTGCTGG	59.702	20	CTCAACATCAGGGTCAGGCT	60.261	20	262	4630	4891	AGCCAATCACAGAAAGCCTG	60.397	20	TATTGCACTTTCCATCTGCG	59.833	20	212	4701	4912	CAGCCAATCACAGAAAGCCT	60.397	20	TATTGCACTTTCCATCTGCG	59.833	20	213	4700	4912
TR45882_c0_g1	AGGGGTAGGGAAGGCAGATA	59.919	20	GTGGCAAATTCCGACTGTCT	60.119	20	200	674	873	GGGGTAGGGAAGGCAGATAC	59.789	20	GTGGCAAATTCCGACTGTCT	60.119	20	199	675	873	GGTAGGGAAGGCAGATACCC	59.789	20	GTGGCAAATTCCGACTGTCT	60.119	20	197	677	873
TR54665_c0_g1	GTTGGTTGCCAAGGTCAAGT	60.012	20	CTTGGGCACTGATGTTGTTG	60.152	20	199	2913	3111	AGTTGGTTGCCAAGGTCAAG	60.149	20	CTTGGGCACTGATGTTGTTG	60.152	20	200	2912	3111	TTGGAAACAGGCAGGGATTA	60.439	20	CTTGGGCACTGATGTTGTTG	60.152	20	256	2856	3111
TR25115_c0_g1	TCACCAGATGAGGTGTTTGAA	59.124	21	AGGGCTGAAATGCAACAAAC	60.118	20	187	741	927	TCACCAGATGAGGTGTTTGAA	59.124	21	GGGCTGAAATGCAACAAACT	60.118	20	186	741	926	TGGTGAAAAATCACCAGATGAG	59.971	22	AGGGCTGAAATGCAACAAAC	60.118	20	197	731	927
TR44671_c1_g1	TTTCCCAATCAGAGAGCAGC	60.483	20	AAAGGGTTAAGCATGGTGTCA	59.485	21	252	1088	1339	ATGGATGTGCCACCTGATCT	60.358	20	TGTCCTGCAGACAAATGAAAA	59.307	21	200	996	1195	TTTCCCAATCAGAGAGCAGC	60.483	20	TGTCCTGCAGACAAATGAAAA	59.307	21	108	1088	1195
TR12894_c1_g1	CAAACATTGCATTCTCTCATGG	60.502	22	CCCAACTTGGAATTTGGACA	60.724	20	133	565	697	CAAACATTGCATTCTCTCATGG	60.502	22	TCAGGGGTCTAATGCACAAA	59.123	20	264	565	828	CATTGCATTCTCTCATGGACTG	60.657	22	CCCAACTTGGAATTTGGACA	60.724	20	129	569	697
TR12520_c0_g1	TGTTCAATGGCATCGTTCAT	59.931	20	TTCGGACCAAGAACCAGAAC	60.088	20	150	456	605	TCAATGGCATCGTTCATCAT	59.89	20	TTCGGACCAAGAACCAGAAC	60.088	20	147	459	605	TGTTCAATGGCATCGTTCAT	59.931	20	TGCTGATCGAAAGCAAGCTA	59.856	20	276	456	731
TR39595_c0_g2	TGAAAGAACTCCAACCGACC	60.088	20	TTTGATGCGCTTTAATCGTC	58.914	20	156	22	177	GGTGAAAGAACTCCAACCGA	60.088	20	TTTGATGCGCTTTAATCGTC	58.914	20	158	20	177	TGAAAGAACTCCAACCGACC	60.088	20	TTTGATGCGCTTTAATCGTCT	59.867	21	156	22	177
TR18086_c0_g2	AAAAATGGTGCTGGGTGAAG	59.971	20	CCTGATAAGACGGCATGGAT	59.917	20	221	869	1089	AAAAATGGTGCTGGGTGAAG	59.971	20	ATCCTGATAAGACGGCATGG	59.917	20	223	869	1091	TTTCAAAAATGGTGCTGGGT	60.344	20	CCTGATAAGACGGCATGGAT	59.917	20	225	865	1089
TR48727_c0_g1	AACCGCCTTTCTGGAAATCT	60.074	20	TGCCGTACTCATTTTGGTGA	60.111	20	171	2943	3113	TTTTTATGGGGATTTTGCCA	60.123	20	TGCCGTACTCATTTTGGTGA	60.111	20	236	2878	3113	GTTCAGTGGGGTTGCTTGAT	59.973	20	CAGGCATTCGAAGTACCACA	59.716	20	269	2812	3080
TR36464_c0_g1	ACTAGTGGCAATGGCAAACC	60	20	GCACGACACTACCAGAAACG	59.365	20	221	4009	4229	ACTAGTGGCAATGGCAAACC	60	20	CGTGATGAGACGGCAGTAAC	59.318	20	264	4009	4272	GAGCATGCAACAGAGATTGG	59.399	20	TCTGCCAATACAAGCACAGG	59.864	20	279	4081	4359
TR23923_c2_g1	CCCTTGTATCCCACATGCTT	59.813	20	TGTTTGCACACACGCACTAA	59.944	20	223	6059	6281	CTCCCTTGTATCCCACATGC	60.34	20	TGTTTGCACACACGCACTAA	59.944	20	225	6057	6281	TCCCTTGTATCCCACATGCT	60.34	20	TGTTTGCACACACGCACTAA	59.944	20	224	6058	6281
TR20184_c1_g1	TGACAAATCTAAGCCCAAAACC	60.344	22	TCATCATGGGATAACAGCCA	59.883	20	208	1233	1440	TGACAAATCTAAGCCCAAAACC	60.344	22	GGGATAACAGCCATATCCCA	59.605	20	201	1233	1433	GGCTTCCATAATTTGTGGTTTT	59.272	22	TGCATGTGCAATGTGTCAAC	60.172	20	218	1345	1562
TR21717_c0_g1	AGCAGTTACCTCTCCAGGCA	60.012	20	AGGCTTTGTTAGGCGACAGA	60.015	20	273	602	874	AGCAGTTACCTCTCCAGGCA	60.012	20	TAGAAAGCATAATCGCCGCT	59.971	20	121	602	722	CTCGGACACTTGAATCGTCA	59.831	20	TAGAAAGCATAATCGCCGCT	59.971	20	147	576	722
TR44893_c0_g1	TTGGCATTCATTTGACAAACA	59.961	21	TTAGGGACAGGTGATGAGCC	60.073	20	259	890	1148	TGGCATTCATTTGACAAACA	58.519	20	TTAGGGACAGGTGATGAGCC	60.073	20	258	891	1148	TTGGCATTCATTTGACAAACA	59.961	21	GGACAGGTGATGAGCCTTCT	59.258	20	255	890	1144
TR17260_c2_g2	TTAACGCGGTATTGACGTTG	59.625	20	CCATGCAGAGATGACCAGAA	59.787	20	251	1069	1319	AACGCGGTATTGACGTTGTT	60.428	20	CCATGCAGAGATGACCAGAA	59.787	20	249	1071	1319	TTAACGCGGTATTGACGTTG	59.625	20	CAGCTGAAGACCATGCAGAG	59.726	20	261	1069	1329
TR25991_c0_g1	AAATCTGGCAACCACAAAGG	59.971	20	AACCGGTTTTCAGTCAGTGG	60.005	20	199	699	897	AATCTGGCAACCACAAAGGA	60.495	20	AACCGGTTTTCAGTCAGTGG	60.005	20	198	700	897	ATCTGGCAACCACAAAGGAA	60.495	20	AACCGGTTTTCAGTCAGTGG	60.005	20	197	701	897
TR25991_c0_g1	CAGGTTTCACTTCATCTTGCC	59.726	21	TCAGGATGGATTTTATTTTGTGAA	59.728	24	219	1064	1282	AGGTTTCACTTCATCTTGCCA	59.726	21	TCAGGATGGATTTTATTTTGTGAA	59.728	24	218	1065	1282	GGTTTCACTTCATCTTGCCA	58.697	20	TCAGGATGGATTTTATTTTGTGAA	59.728	24	217	1066	1282
TR55335_c4_g1	TCGTATCAAAAGCATGTTATATTTGAA	60.152	27	ACCTGACGACTGTCCCAAAC	60.009	20	267	372	638	CGTATCAAAAGCATGTTATATTTGAA	58.681	26	ACCTGACGACTGTCCCAAAC	60.009	20	266	373	638	TCGTATCAAAAGCATGTTATATTTGAA	60.152	27	CGAACACCCATTCTGGAAAT	59.79	20	248	372	619
TR16930_c0_g1	ATAAGCCCGTCTTGCTTTCA	59.845	20	CCTGCTTGAAATTCACGGTT	60.11	20	261	2451	2711	TGATAAGCCCGTCTTGCTTT	59.845	20	CCTGCTTGAAATTCACGGTT	60.11	20	263	2449	2711	ATAAGCCCGTCTTGCTTTCA	59.845	20	TGAAATTCACGGTTCTGTGC	59.697	20	255	2451	2705
TR39248_c0_g2	GGAGACTGTGTGCTTAGGAAGG	60.302	22	TATCCCCGAAACAAGCTCAA	60.576	20	279	1045	1323	GGAGACTGTGTGCTTAGGAAGG	60.302	22	TTATCCCCGAAACAAGCTCA	60.576	20	280	1045	1324	TGGAGACTGTGTGCTTAGGAAG	59.538	22	TATCCCCGAAACAAGCTCAA	60.576	20	280	1044	1323
TR20038_c0_g1	CTCTCCTTTCACTGTTTCCGA	59.458	21	TTTCACACAAACATGCACACA	59.625	21	195	241	435	TCTCCTTTCACTGTTTCCGA	58.414	20	TTTCACACAAACATGCACACA	59.625	21	194	242	435	CTCTCCTTTCACTGTTTCCGA	59.458	21	TTCACACAAACATGCACACA	58.028	20	194	241	434
TR11220_c0_g1	TTTATGATCTTGGGCTGAGACA	59.708	22	TGAACATAGGCCCAACTCAA	59.123	20	239	833	1071	TTTATGATCTTGGGCTGAGACA	59.708	22	TCATGAACATAGGCCCAACTC	59.947	21	242	833	1074	TGATCTTGGGCTGAGACATAA	58.312	21	TGAACATAGGCCCAACTCAA	59.123	20	235	837	1071
TR35346_c0_g2	TTACAAACTTCGCTACCGGG	60.124	20	TGGATGGACAGACAATGTGG	60.378	20	194	145	338	TTACAAACTTCGCTACCGGG	60.124	20	GATGGACAGACAATGTGGCTT	59.989	21	192	145	336	TTTCCGAACACAGCTTCTTG	59.047	20	TAGCGATCCAAATGTTGCAC	59.694	20	273	176	448
TR29283_c0_g1	AAGATGGAACCAAACATGCC	59.797	20	CAGGGAGTCATCTATTGGGG	59.356	20	274	2464	2737	GCCAAGATGGAACCAAACAT	59.797	20	CAGGGAGTCATCTATTGGGG	59.356	20	277	2461	2737	GTGAACACGCCAAGAGATGA	59.837	20	TGGGGACTTCATGGTAGGTT	59.259	20	222	2501	2722
TR38315_c1_g2	TTGGCCTTGAAGAAGATGTG	58.847	20	AATGTGGAAATGCCCAATGT	60.059	20	156	995	1150	TTGGCCTTGAAGAAGATGTG	58.847	20	ATGTGGAAATGCCCAATGTT	60.059	20	155	995	1149	TTTGGCCTTGAAGAAGATGTG	60.234	21	AATGTGGAAATGCCCAATGT	60.059	20	157	994	1150
TR18770_c0_g1	AAACACATTGTAATGGCTTTTTG	58.176	23	CGTTGCACAGAACATCGGTA	60.72	20	277	1047	1323	AAACACATTGTAATGGCTTTTTGT	58.947	24	CGTTGCACAGAACATCGGTA	60.72	20	277	1047	1323	GATTGAAAACACATTGTAATGGC	58.422	23	TGCTTATGGGTAACGCAGATT	59.622	21	169	1041	1209
TR40004_c0_g1	ACCACTGCCATTTTCACCTC	59.973	20	AATGCCTATGCAGATCCACC	59.923	20	175	868	1042	CATGCTGTGCAGAACCTTGT	59.905	20	AATGCCTATGCAGATCCACC	59.923	20	104	939	1042	ACATGCTGTGCAGAACCTTG	59.905	20	AATGCCTATGCAGATCCACC	59.923	20	105	938	1042
TR20673_c0_g1	CATGCATGCAGGGTATTAAA	57.143	20	TTTCCCCTTTGAAAATTCGAT	59.774	21	188	225	412	CATGCATGCAGGGTATTAAA	57.143	20	CTTTCCCCTTTGAAAATTCG	58.668	20	189	225	413	CATGCATGCAGGGTATTAAA	57.143	20	TTTGAACACTTTCCCCTTTGA	59.573	21	197	225	421
TR5035_c1_g1	AGCAGCAATACATCCAGGCT	59.866	20	TGATGTTGAAAATTGCCTTCA	59.147	21	277	925	1201	TGAGCAGCAATACATCCAGG	59.823	20	TGATGTTGAAAATTGCCTTCA	59.147	21	279	923	1201	CAGCAATACATCCAGGCTGA	59.823	20	TGATGTTGAAAATTGCCTTCA	59.147	21	275	927	1201
TR55150_c2_g1	TCGACCAGTCACCATTTCAG	59.676	20	CAGTGCAATAATTTGGCTGG	59.182	20	273	407	679	TCGACCAGTCACCATTTCAG	59.676	20	ACAGTGCAATAATTTGGCTGG	60.011	21	274	407	680	TCGACCAGTCACCATTTCAG	59.676	20	TGCAATAATTTGGCTGGAAG	58.769	20	270	407	676
TR19842_c0_g1	TGCTGTTGCAGGGTCACTAA	60.449	20	GATGCGGTTTGGTTTGATTC	60.318	20	182	709	890	TTGCTGTTGCAGGGTCACTA	60.449	20	GATGCGGTTTGGTTTGATTC	60.318	20	183	708	890	ATTGCTGTTGCAGGGTCACT	60.721	20	GATGCGGTTTGGTTTGATTC	60.318	20	184	707	890
TR34431_c0_g1	TGAGTTCATAGCCCGTGTCA	60.263	20	TTTATGACCTTCAGCCCAGG	60.066	20	173	208	380	TGCTGCTTTGGATTCATTTG	59.809	20	ATCTCAAGCAGTCGCCATTT	59.843	20	132	315	446	TGCTGCTTTGGATTCATTTG	59.809	20	AAATCTCAAGCAGTCGCCAT	59.843	20	134	315	448
TR44211_c1_g1	TTGCCTTCCACTTCATTGTG	59.691	20	TGAGCGGCACTTTCATGTTA	60.401	20	160	131	290	GGCATGTGCATAAGAATGGA	59.504	20	TGAGCGGCACTTTCATGTTA	60.401	20	203	88	290	TTGCCTTCCACTTCATTGTG	59.691	20	TTTTATGGTGGGTGGGGTT	59.895	19	178	131	308
TR1201_c0_g1	GGCACGTGATACGTCCTTG	60.128	19	GGCACGTGATACGTCCTTG	60.128	19	134	447	580	GCACGTGATACGTCCTTGAT	58.599	20	GGCACGTGATACGTCCTTG	60.128	19	133	448	580	GGCACGTGATACGTCCTTG	60.128	19	GCACGTGATACGTCCTTGAT	58.599	20	133	447	579
TR31961_c0_g1	CAACAAAACCAAAACCACTGA	58.565	21	TCGATCAATTTGACAGGTGC	59.654	20	279	23	301	ACAACAAAACCAAAACCACTGA	59.42	22	TCGATCAATTTGACAGGTGC	59.654	20	280	22	301	CAACAAAACCAAAACCACTGAT	58.904	22	TCGATCAATTTGACAGGTGC	59.654	20	279	23	301
TR25507_c50_g34	CCATGGTTACCCATTCTCCA	60.572	20	ATACAAGCAGGTGCGAAAGC	60.416	20	272	570	841	CCATGGTTACCCATTCTCCA	60.572	20	AAAAAGGCATGCTGTGTTCA	59.322	20	149	570	718	CCATGGTTACCCATTCTCCA	60.572	20	TACAAGCAGGTGCGAAAGC	60.15	19	271	570	840
TR48733_c2_g15	TGTTAGCCAACCCAAATCCT	59.429	20	AAGCCACTGAATTGCAATAACTA	58.044	23	256	631	886	TAGCCAACCCAAATCCTAGC	59.182	20	AAGCCACTGAATTGCAATAACTA	58.044	23	253	634	886	GCCAACCCAAATCCTAGCTC	60.959	20	AAGCCACTGAATTGCAATAACTA	58.044	23	251	636	886
TR23753_c4_g1	ACTTACCCGGAAAATCGAGG	60.312	20	AAGATTCCATCATTCAGCGG	60.036	20	159	5	163	ACTTACCCGGAAAATCGAGG	60.312	20	AACGGGGATGACTTCCTTTT	59.805	20	123	5	127	ACTTACCCGGAAAATCGAGG	60.312	20	AGCGGTGAATTCCAGAACAG	60.255	20	144	5	148
TR2029_c0_g1	CCATGCAAGAAATTCAGCAG	59.42	20	TTTTCCTTTATTTCAATATGGGGT	59.101	24	266	148	413	CCATGCAAGAAATTCAGCAG	59.42	20	TTTCCTTTATTTCAATATGGGGT	57.927	23	265	148	412	CCATGCAAGAAATTCAGCAG	59.42	20	GTTTTCCTTTATTTCAATATGGGGT	59.778	25	267	148	414
TR2029_c0_g1	TGGGATCCTTTGTATTTACCG	58.818	21	CTTGCACGGTGTAGTTGTCG	60.361	20	250	635	884	TGGGATCCTTTGTATTTACCG	58.818	21	TGTCGGTTCTTCTTTCAGCA	59.566	20	235	635	869	CTGGGATCCTTTGTATTTACCG	59.732	22	CTTGCACGGTGTAGTTGTCG	60.361	20	251	634	884
TR47903_c0_g1	TCTGCCAGTACTGCATCGTC	60.016	20	TAATGGTGGCATTGTGTTCG	60.379	20	145	177	321	TCTGCCAGTACTGCATCGTC	60.016	20	ACGTCATCCCGAAAATCAGA	60.461	20	210	177	386	TCTGCCAGTACTGCATCGTC	60.016	20	GACGTCATCCCGAAAATCAG	60.461	20	211	177	387
TR33414_c0_g1	AACTGCAGCTGTGAGCATGT	59.654	20	CGTCCATCTCATGTACTGTGG	59.022	21	279	89	367	AACTGCAGCTGTGAGCATGT	59.654	20	TTATTTTGCGGCTTGATTTTT	58.793	21	251	89	339	AACTGCAGCTGTGAGCATGT	59.654	20	TATTTTGCGGCTTGATTTTT	57.489	20	250	89	338
TR9579_c0_g1	TTTCTTTGCCGTGCATGA	59.915	18	AACTTCGAGTTGCATTGTAGC	57.196	21	166	0	165	TTTCTTTGCCGTGCATGA	59.915	18	TTTAGAATAGGCGTCAGTCAACA	58.955	23	254	0	253	TTTCTTTGCCGTGCATGA	59.915	18	TTCGAGAGAAGGAGAGAGAAAAA	58.901	23	113	0	112
TR23739_c0_g1	GGCTGTTCTTGCTACCTTGC	60.022	20	AAAGGCAAACACAAACAGGG	60.008	20	255	1219	1473	CTACAGGGGCTGGCATTTTA	60.089	20	AAAGGCAAACACAAACAGGG	60.008	20	232	1242	1473	GGGCTGTTCTTGCTACCTTG	59.875	20	AAAGGCAAACACAAACAGGG	60.008	20	256	1218	1473
TR17475_c0_g1	CGTTTTCGATTCGACTTGGT	60.11	20	TTTAATCCACGAAAAGCCGA	60.56	20	262	54	315	ACGTTTTCGATTCGACTTGG	60.11	20	TTTAATCCACGAAAAGCCGA	60.56	20	263	53	315	CGTTTTCGATTCGACTTGGT	60.11	20	ATTTAATCCACGAAAAGCCG	59.078	20	263	54	316
TR50788_c0_g1	AGCCATATCCCTGTAACAGCA	59.606	21	TTTGGCCATATCACAGGAAA	58.965	20	195	221	415	AGCCATATCCCTGTAACAGCA	59.606	21	TTGGCCATATCACAGGAAAA	58.965	20	194	221	414	GCCATATCCCTGTAACAGCA	58.6	20	TTTGGCCATATCACAGGAAA	58.965	20	194	222	415
TR50788_c0_g1	GGTGAAAAGTTTCATGATCGC	59.565	21	ACAGTGTAGATCCTGCGGCT	59.898	20	276	517	792	GGTGAAAAGTTTCATGATCGC	59.565	21	AACAGTGTAGATCCTGCGGC	60.285	20	277	517	793	GGTGAAAAGTTTCATGATCGC	59.565	21	TGATTTGCTTGTTTTGTGCC	59.712	20	136	517	652
TR50788_c0_g1	GGGCTTTTCCCTTTTCTCAG	60.18	20	CCATCAAAGCCAGAAGGAAA	60.184	20	279	1269	1547	GGGCTTTTCCCTTTTCTCAG	60.18	20	CTGAACCGCCAAAAGAAAAC	59.724	20	242	1269	1510	GGGCTTTTCCCTTTTCTCAG	60.18	20	AGTTTGTTCCTGCTGAACCG	60.291	20	254	1269	1522
TR46190_c0_g1	TCTTGGGACCTGTTCAGCTT	59.844	20	ATGATTCACTGATGGTGCGA	60.08	20	248	97	344	GGGACCTGTTCAGCTTCGTA	60.255	20	ATGATTCACTGATGGTGCGA	60.08	20	244	101	344	GATCTTGGGACCTGTTCAGC	59.661	20	ATGATTCACTGATGGTGCGA	60.08	20	250	95	344
TR53688_c10_g2	TTACACCCACGGTGGTTTCT	60.269	20	TATCGGCAATTTTGGCTTTT	59.565	20	276	162	437	TTACACCCACGGTGGTTTCT	60.269	20	TTTATCGGCAATTTTGGCTT	59.565	20	278	162	439	ACACCCACGGTGGTTTCTAA	60.269	20	TATCGGCAATTTTGGCTTTT	59.565	20	274	164	437
TR42014_c0_g2	GGATAGGAACAATTGCACTTCA	59.091	22	CGACAATTGGGTAGGAGACC	59.405	20	233	45	277	TCATTGATGGGATAGGAACAA	57.873	21	CGACAATTGGGTAGGAGACC	59.405	20	242	36	277	AATCATTGATGGGATAGGAACAA	59.563	23	CGACAATTGGGTAGGAGACC	59.405	20	244	34	277
TR48723_c0_g3	GCGCAAACAATGCTACTCAA	60.021	20	GGTGAAACATGCACATCAGG	59.967	20	184	10	193	GCGCAAACAATGCTACTCAA	60.021	20	AGGGTGAAACATGCACATCA	59.967	20	186	10	195	GCGCAAACAATGCTACTCAA	60.021	20	GGGTGAAACATGCACATCAG	59.967	20	185	10	194
TR48723_c0_g3	TGAAGAAGCCGTGTAGCAAA	59.609	20	TCTGACAAAAATGCAGGTCG	59.84	20	235	326	560	TTGAAGAAGCCGTGTAGCAA	59.609	20	TCTGACAAAAATGCAGGTCG	59.84	20	236	325	560	TGAAGAAGCCGTGTAGCAAA	59.609	20	GACAAAAATGCAGGTCGTTG	59.174	20	232	326	557
TR55292_c0_g1	TACATACGCACCGTTTGCAT	60.021	20	ACGTGTTCACCGTTTTGATG	59.465	20	181	904	1084	TACATACGCACCGTTTGCAT	60.021	20	CGTGTTCACCGTTTTGATGA	60.552	20	180	904	1083	GGGTTTTACATACGCACCGT	59.752	20	ACGTGTTCACCGTTTTGATG	59.465	20	187	898	1084
TR27206_c0_g1	TTGTTGTTCAGGCAGCACTC	60.032	20	GTGGAGCCTCACACTGACCT	60.315	20	277	425	701	AAAATCAATGCTGCCATTCC	59.907	20	GTGGAGCCTCACACTGACCT	60.315	20	238	464	701	GATTTGTTGTTCAGGCAGCA	59.847	20	GTGGAGCCTCACACTGACCT	60.315	20	280	422	701
TR17329_c2_g1	ACCTGTGGATGCTGCCTTAC	60.142	20	CCACTTGGTGTACCTCCTGC	60.567	20	179	522	700	CATGGAGGACAAACAGCTCA	59.831	20	CCACTTGGTGTACCTCCTGC	60.567	20	277	424	700	ACCTGTGGATGCTGCCTTAC	60.142	20	ACGATCCCATGTCAAACACC	60.645	20	257	522	778
TR42533_c0_g1	TTCGTATGTTCCTCCAAGCC	60.074	20	TCCTGGTTTTGTAGCGTTTTG	60.152	21	114	1474	1587	CAAGCCAAAATGTAGTCGCA	59.872	20	TCCTGGTTTTGTAGCGTTTTG	60.152	21	100	1488	1587	GGCCTTGTTTAACTGGTTGC	59.615	20	TCCTGGTTTTGTAGCGTTTTG	60.152	21	280	1308	1587
TR7249_c2_g1	GCAAGCTTAGAAAGCCCAGA	59.73	20	AAATCCAGCAGCAGAGCAAT	59.985	20	280	555	834	AAAGCCCAGAATGAAAACCA	59.546	20	AAATCCAGCAGCAGAGCAAT	59.985	20	270	565	834	GCCCAGAATGAAAACCAGTC	59.532	20	AAATCCAGCAGCAGAGCAAT	59.985	20	267	568	834
TR32212_c2_g2	TGAGGGGTTTGACATTACCG	60.745	20	CGTATTCCATTTCGTTGCCT	59.96	20	264	1388	1651	CCGTGAGGGGTTTGACATTA	60.745	20	CGTATTCCATTTCGTTGCCT	59.96	20	267	1385	1651	CATACAGACAAACGGACGGA	59.566	20	ACGGGCTTTACCATTTCAGA	59.569	20	211	1417	1627
TR32212_c2_g2	TAGACGCAGTAGCAGCAGCA	61.05	20	CCCTCCCCGATTTTATCTGT	60.145	20	159	1758	1916	TAGACGCAGTAGCAGCAGCA	61.05	20	ACGTTGTAAAGTGACCCCCA	60.269	20	267	1758	2024	TAGACGCAGTAGCAGCAGCA	61.05	20	CGTTGTAAAGTGACCCCCAT	59.711	20	266	1758	2023
TR43703_c0_g3	TTGCTCTTCACTTTGGAGGG	60.366	20	ATCGAGCAATCCGAGAAATG	60.177	20	191	1413	1603	TGCCTCTTGTTTTTCTGCAA	59.585	20	ATCGAGCAATCCGAGAAATG	60.177	20	275	1329	1603	TCTCGTCGCAAATTTTCCTT	59.823	20	AGAGCGCATGGAAAGAGAAC	59.579	20	276	1306	1581
TR16352_c0_g1	CCTAACTGGCCAAATGTCGT	59.993	20	TGATACGGCAGAAGTCATCG	59.823	20	174	877	1050	CCTAACTGGCCAAATGTCGT	59.993	20	TTGTGATTGTGGTGTGCTGA	59.705	20	191	877	1067	CAGCCTAACTGGCCAAATGT	60.132	20	TGATACGGCAGAAGTCATCG	59.823	20	177	874	1050
TR17258_c2_g5	TAATATCGGGGTGCCCATAA	59.998	20	TACATGTTGTGGATGGCAGC	60.549	20	188	322	509	TAATATCGGGGTGCCCATAA	59.998	20	GCAGCAAAACATCCACAATC	59.131	20	173	322	494	TAATATCGGGGTGCCCATAA	59.998	20	GGCAGCAAAACATCCACAAT	60.905	20	174	322	495
TR17343_c0_g2	TTCCGCAAATGCATCAATTA	60.037	20	AGGTAAATGAGAGGGCCGAT	59.925	20	198	380	577	TTCCGCAAATGCATCAATTA	60.037	20	GGTAAATGAGAGGGCCGATT	60.286	20	197	380	576	TTCCGCAAATGCATCAATTA	60.037	20	TAGGTAAATGAGAGGGCCGA	59.662	20	199	380	578
TR17343_c0_g2	CTCGTCCAACCATTTTGCTT	60.11	20	ATGAAAAGAAGGGAAACGCA	59.685	20	123	1299	1421	TAACACGTTCACCTCGTCCA	60.152	20	ATGAAAAGAAGGGAAACGCA	59.685	20	135	1287	1421	CTCGTCCAACCATTTTGCTT	60.11	20	TGAAAAGAAGGGAAACGCAG	60.357	20	122	1299	1420
TR28308_c0_g1	TGTCGGAACTGACGGATACA	60.112	20	CAACATCCCCTTCAGCTGTT	60.111	20	191	268	458	TGTGTCGGAACTGACGGATA	60.112	20	CAACATCCCCTTCAGCTGTT	60.111	20	193	266	458	CCAATGTGAATGTGTCGGAA	60.367	20	CAACATCCCCTTCAGCTGTT	60.111	20	203	256	458
TR18151_c0_g1	GTTTCACTGCGCATGTCTGT	59.912	20	ACCGGTTTGTATTGAGAGCG	60.132	20	224	44	267	GTTTCACTGCGCATGTCTGT	59.912	20	TGCGAAGTTGTTTATTGGCA	60.251	20	248	44	291	GTTTCACTGCGCATGTCTGT	59.912	20	GTGGCAAGTGTGCAAGAATG	60.31	20	266	44	309
TR58742_c0_g1	TTGCGTACTCTACCCATCCA	59.148	20	TTCGTAGATTCTCATCCCCG	60.029	20	121	43	163	TTGCGTACTCTACCCATCCA	59.148	20	TCAAAAGCCACTGAAATCCC	60.051	20	244	43	286	TTGCGTACTCTACCCATCCA	59.148	20	CACTGAAATCCCTGCTTGCT	60.397	20	236	43	278
TR25136_c3_g1	GTTAGCAACGGTCGGAACAT	60	20	TCGGTAATCGTTACAGACGC	58.799	20	109	1267	1375	GTTAGCAACGGTCGGAACAT	60	20	TCGGTAATCGTTACAGACGCT	59.783	21	109	1267	1375	TCTATGAAAAACCCGGAACG	59.931	20	TCGGTAATCGTTACAGACGC	58.799	20	242	1134	1375
TR25507_c50_g13	CCATGGTTACCCATTCTCCA	60.572	20	ATACAAGCAGGTGCGAAAGC	60.416	20	272	580	851	CCATGGTTACCCATTCTCCA	60.572	20	AAAAAGGCATGCTGTGTTCA	59.322	20	149	580	728	CCATGGTTACCCATTCTCCA	60.572	20	TACAAGCAGGTGCGAAAGC	60.15	19	271	580	850
TR18919_c0_g1	TCACAATATGCAAGGGAGGC	61.003	20	ACGCCATTTTGCAAAGAAAT	59.592	20	258	825	1082	ATATGCAAGGGAGGCCAAG	60.044	19	ACGCCATTTTGCAAAGAAAT	59.592	20	253	830	1082	TTTCACAATATGCAAGGGAGG	59.946	21	ACGCCATTTTGCAAAGAAAT	59.592	20	260	823	1082
TR33384_c1_g1	CATCCGACTCCCAGTCATCT	60.072	20	TGCAGACGATCTATGCGATG	60.948	20	222	6566	6787	TCCGACTCCCAGTCATCTTC	60.199	20	TGCAGACGATCTATGCGATG	60.948	20	220	6568	6787	CTTCTTCATCCGACTCCCAG	59.797	20	TGCAGACGATCTATGCGATG	60.948	20	228	6560	6787
TR33392_c0_g1	TTCGATCCAGCTTTCAATCC	60.155	20	GCTCTACGGTGCTGAAAACC	59.882	20	204	397	600	TTCGATCCAGCTTTCAATCC	60.155	20	AGATTGTCGCTGTGATGTGC	59.87	20	237	397	633	CACCTTTCGATCCAGCTTTC	59.813	20	GCTCTACGGTGCTGAAAACC	59.882	20	209	392	600
TR7254_c4_g2	GCTGGGAAGGAGTGTGGTAA	60.111	20	AATTTTGGGCCGATGTGTAG	59.823	20	276	460	735	TGGGAAGGAGTGTGGTAAGC	60.111	20	AATTTTGGGCCGATGTGTAG	59.823	20	274	462	735	AGCTAAGGCAGGACCTTTCC	59.848	20	AATTTTGGGCCGATGTGTAG	59.823	20	174	562	735
TR9393_c1_g1	GCTAGAATGCCAAAACAGTCAG	59.044	22	TGGCCATGCAAATTTAAAGA	59.146	20	276	1129	1404	AGCTAGAATGCCAAAACAGTCA	59.044	22	TGGCCATGCAAATTTAAAGA	59.146	20	277	1128	1404	GCTAGAATGCCAAAACAGTCA	58.04	21	TGGCCATGCAAATTTAAAGA	59.146	20	276	1129	1404
TR44842_c0_g1	ATCATGTGTTGGTCCCAGGT	60.096	20	CCAGGATCTCTGTTGACATCG	60.662	21	107	2619	2725	AGTTTGAAACCAAACGGCAG	60.147	20	CCAGGATCTCTGTTGACATCG	60.662	21	162	2564	2725	AAACCAAACGGCAGGTTGTA	60.399	20	CCAGGATCTCTGTTGACATCG	60.662	21	156	2570	2725
TR44215_c1_g2	CGTCGTATGAAGCCATTCAA	59.688	20	TGATCCGTTACCAGTGTCGT	59.01	20	248	694	941	CGTCGTATGAAGCCATTCAA	59.688	20	AATGATCCGTTACCAGTGTCG	59.867	21	250	694	943	GCAATGTCGTCGTATGAAGC	59.306	20	TGATCCGTTACCAGTGTCGT	59.01	20	255	687	941
TR32401_c0_g2	CTCCTCCGATCCCGAATAAT	60.245	20	ATTCATTTTTGGCGGTGTTG	60.732	20	195	956	1150	TTTCTTTCACGTGCTCCTCC	60.375	20	ATTCATTTTTGGCGGTGTTG	60.732	20	208	943	1150	GATCCCGAATAATAAGGGGC	59.605	20	ATTCATTTTTGGCGGTGTTG	60.732	20	188	963	1150
TR56036_c0_g2	TTGGTGTCGGCAAAATTGTA	59.969	20	CAGATGGACAGGGCAAAAAC	60.495	20	209	1979	2187	TTGGTGTCGGCAAAATTGTA	59.969	20	ACAGATGGACAGGGCAAAAA	60.495	20	210	1979	2188	TTGGTGTCGGCAAAATTGTA	59.969	20	AGATGGACAGGGCAAAAACA	60.495	20	208	1979	2186
TR44922_c0_g2	ACGCCAATCAGGTCTCAAGT	59.727	20	GCAGATTGTTTCTTGCCACA	59.847	20	218	688	905	ACGCCAATCAGGTCTCAAGT	59.727	20	TAGGCCGCAGATTGTTTCTT	59.845	20	224	688	911	CATACGCCAATCAGGTCTCA	59.673	20	GCAGATTGTTTCTTGCCACA	59.847	20	221	685	905
TR14175_c0_g1	GCATGAATGCAGACACTTTCA	59.862	21	TGGCGTGCCTCATATGGTAT	61.278	20	245	879	1123	AGGCATGAATGCAGACACTTT	59.755	21	TGGCGTGCCTCATATGGTAT	61.278	20	247	877	1123	GGCATGAATGCAGACACTTT	58.726	20	TGGCGTGCCTCATATGGTAT	61.278	20	246	878	1123
TR23236_c0_g1	CGTGAAAGAAAACAGTGCCA	59.881	20	GAGGCACGTGATGCAAATAC	59.156	20	225	532	756	CGTGAAAGAAAACAGTGCCA	59.881	20	GGCACGTGATGCAAATACCT	60.925	20	223	532	754	CGTGAAAGAAAACAGTGCCA	59.881	20	AGGCACGTGATGCAAATACC	60.925	20	224	532	755
TR23377_c0_g3	CACCAACAGCCAAGGAAACT	60.149	20	TTGAGCCAGTGACATTGCAG	61.023	20	226	85	310	CACCAACAGCCAAGGAAACT	60.149	20	TGAGCCAGTGACATTGCAG	59.531	19	225	85	309	CACCAACAGCCAAGGAAACT	60.149	20	AATGGTTGAGCCAGTGACATT	59.468	21	231	85	315
TR34686_c0_g1	TGTGTGCTCAGAATGAAGTGTT	58.426	22	TTCCAACAACTGACTTCCTTCA	59.751	22	202	181	382	TGTGTGCTCAGAATGAAGTGTT	58.426	22	TCCAACAACTGACTTCCTTCA	58.328	21	201	181	381	AATGTGTGCTCAGAATGAAGTGTT	60.102	24	TTCCAACAACTGACTTCCTTCA	59.751	22	204	179	382
TR989_c0_g1	TTGGTACAGCAATGGAATGAA	59.027	21	AGTGAGAACTGAACACGGGC	60.307	20	175	507	681	TTGGTACAGCAATGGAATGAA	59.027	21	GTGAGAACTGAACACGGGCT	60.307	20	174	507	680	TTTGGTACAGCAATGGAATGA	59.027	21	AGTGAGAACTGAACACGGGC	60.307	20	176	506	681
TR27127_c0_g1	ACGGCAAAAACCTTCATCAC	59.978	20	ATTAGCTTCGACCTTCGCAA	59.982	20	142	598	739	CGACAACTCCCACAAATCCT	59.966	20	ATTAGCTTCGACCTTCGCAA	59.982	20	107	633	739	GAAGGCAGACTCAATCAGGC	59.957	20	ATTAGCTTCGACCTTCGCAA	59.982	20	273	467	739
TR55699_c0_g1	AAACACCACCAAACAGGAGC	60.012	20	GTGCTGGAAACTGCTGTTCA	60.032	20	116	350	465	AAACACCACCAAACAGGAGC	60.012	20	GGCTAAACCTTTGCCAAACA	60.11	20	201	350	550	AAACACCACCAAACAGGAGC	60.012	20	TTCAGGACCAAACAGAGGCT	59.844	20	255	350	604
TR51786_c3_g2	TCCAAGCTGCTTTTTGTGTG	60.027	20	CAGAAAACCGTACCGGACAT	59.853	20	242	1098	1339	AGCTGCTTTTTGTGTGGCTT	60.059	20	CAGAAAACCGTACCGGACAT	59.853	20	238	1102	1339	AAGCTGCTTTTTGTGTGGCT	60.059	20	CAGAAAACCGTACCGGACAT	59.853	20	239	1101	1339
TR37311_c0_g1	TCAATTATTTGAGTGGTGCTTCA	59.639	23	TTGAAAAGGGCCATCTTTTG	60.046	20	259	381	639	TCAATTATTTGAGTGGTGCTTCA	59.639	23	TGAAAAGGGCCATCTTTTGT	59.546	20	258	381	638	TTGATCAATTATTTGAGTGGTGC	59.002	23	TTGAAAAGGGCCATCTTTTG	60.046	20	263	377	639
TR41596_c1_g1	TCAGATGGAAAGATTTTAGCTTGA	59.416	24	CTGCGACCTTCTCTTCATCC	59.95	20	165	100	264	TCAGATGGAAAGATTTTAGCTTGA	59.416	24	TGCGACCTTCTCTTCATCCT	59.95	20	164	100	263	TCAGATGGAAAGATTTTAGCTTGA	59.416	24	GCCTCATCCAACTGTGACCT	60.12	20	221	100	320
TR23282_c2_g2	TGTCATGGTTGTAGTTGGACG	59.475	21	ACCTCACCTTTGCCAATCAC	59.973	20	270	2	271	TGTCATGGTTGTAGTTGGACG	59.475	21	GTGACCTCACCTTTGCCAAT	59.973	20	273	2	274	TGTCATGGTTGTAGTTGGACG	59.475	21	CCAATCACCGTACCAGATCC	60.195	20	258	2	259
TR51786_c3_g12	TCCAAGCTGCTTTTTGTGTG	60.027	20	CAGAAAACCGTACCGGACAT	59.853	20	242	1098	1339	AGCTGCTTTTTGTGTGGCTT	60.059	20	CAGAAAACCGTACCGGACAT	59.853	20	238	1102	1339	AAGCTGCTTTTTGTGTGGCT	60.059	20	CAGAAAACCGTACCGGACAT	59.853	20	239	1101	1339
TR44845_c2_g1	AGATTTTTCGCGGACTTGAA	59.823	20	CAACTTTGACTGGGAAGCCT	59.328	20	240	709	948	TTTTCGCGGACTTGAATTTT	59.699	20	CAACTTTGACTGGGAAGCCT	59.328	20	236	713	948	TTTTTCGCGGACTTGAATTT	59.699	20	CAACTTTGACTGGGAAGCCT	59.328	20	237	712	948
TR25838_c1_g1	TGGTCTAACTTGGCCATTTCTT	60.001	22	TTTTTATCCTTAACTGGGGCA	58.617	21	198	113	310	TGGTCTAACTTGGCCATTTCTT	60.001	22	TTTTTATCCTTAACTGGGGCAG	59.515	22	198	113	310	TGGTCTAACTTGGCCATTTCT	58.707	21	TTTTTATCCTTAACTGGGGCA	58.617	21	198	113	310
TR32794_c0_g1	TCCCTAACAAAAGGAAGGCA	59.679	20	AAGGATGTGCTGGCTGATCT	59.834	20	280	2497	2776	GGAGTGTCGGTAAAGGCAAC	59.598	20	AAGGATGTGCTGGCTGATCT	59.834	20	257	2520	2776	GGAGTGTCGGTAAAGGCAAC	59.598	20	ACAAGGATGTGCTGGCTGAT	60.688	20	259	2520	2778
TR55657_c0_g1	CCTTGTGAAATCCGTCTGGT	59.966	20	AACAGCAAGAACGGCAAACT	59.92	20	256	644	899	CCTTGTGAAATCCGTCTGGT	59.966	20	ACAGCAAGAACGGCAAACTT	59.92	20	255	644	898	CCTTGTGAAATCCGTCTGGT	59.966	20	TGGCGTAATGAAACGAAACA	60.111	20	272	644	915
TR55097_c2_g1	CACGTTCAATTTCAGGAGCTT	59.369	21	TTGGCAATGTTTTTCTTTCCTT	59.984	22	264	1413	1676	CAGGAGCTTTATGAAATCCCA	59.168	21	TTGGCAATGTTTTTCTTTCCTT	59.984	22	252	1425	1676	CACGTTCAATTTCAGGAGCTT	59.369	21	TGGCAATGTTTTTCTTTCCTT	58.729	21	263	1413	1675
TR3255_c0_g1	CAATTCAGAGGGCAAGCTGT	60.397	20	AAACAAGATACATTCATCATTTGC	57.301	24	279	3831	4109	CAGAGGGCAAGCTGTAATGA	59.024	20	AAACAAGATACATTCATCATTTGC	57.301	24	274	3836	4109	TCAGAGGGCAAGCTGTAATG	59.024	20	TGAAACAAGATACATTCATCATTTG	58.128	25	277	3835	4111
TR48092_c0_g1	TGGTCCCCAAAGAAAATGTC	59.767	20	TGGCCACCATTTGACATAAA	59.786	20	156	239	394	TGGTCCCCAAAGAAAATGTC	59.767	20	TTCAGCAGCTAGTGGAACCC	60.397	20	253	239	491	TGGTCCCCAAAGAAAATGTC	59.767	20	GTCACCCTCTTTCGGTGTTC	59.555	20	202	239	440
TR48668_c0_g2	CACTGGGCTTTTGTAATGTGC	60.549	21	CAAAGGATCAACTGGTCTGG	58.13	20	230	221	450	CACTGGGCTTTTGTAATGTGC	60.549	21	GGAAGGTGAGACAAAGGATCA	59.126	21	241	221	461	TTCCCACAAAGGCCACTAAA	60.472	20	TTCCATTTCTTTTTGAACTGCAT	59.997	23	273	128	400
TR2758_c0_g1	TGCTAAAGTGCTTTGGGAGG	60.378	20	TGTTTTGTGATAATGCAAGCAG	58.89	22	218	482	699	TGCTAAAGTGCTTTGGGAGG	60.378	20	TTTATTGTCGCTGGTTACAGG	57.851	21	163	482	644	TGCTAAAGTGCTTTGGGAGG	60.378	20	TTGTTTTGTGATAATGCAAGCAG	60.177	23	219	482	700
TR26451_c1_g1	GGGTTGTGCCAAATCTGACT	59.973	20	TGTGAAACGAACGATTCTTGA	59.307	21	114	171	284	GGGTTGTGCCAAATCTGACT	59.973	20	GAAATGAATGTGAAACGAACGA	59.982	22	122	171	292	ATGCCATGGGTGTGCTAGAT	60.37	20	TGTGAAACGAACGATTCTTGA	59.307	21	188	97	284
TR4784_c1_g2	CACCAGAATGCCTGGAGAAT	60.073	20	TGTTGTCAGCAAGGAACACTG	59.93	21	234	288	521	CCTGCCATGTCTCCAGATTT	60.073	20	TGTTGTCAGCAAGGAACACTG	59.93	21	161	361	521	CCTGCCATGTCTCCAGATTT	60.073	20	TTCAACAGGCCTGCCTAGATA	59.853	21	246	361	606
TR25631_c0_g1	CAAAGGTAAAATGTTGCCCG	60.348	20	CGAACGTCAACATGGTCAAA	60.552	20	198	499	696	CAAAGGTAAAATGTTGCCCG	60.348	20	TTATCCGAACGTCAACATGG	59.395	20	203	499	701	AAGGTAAAATGTTGCCCGAA	59.451	20	CGAACGTCAACATGGTCAAA	60.552	20	196	501	696
TR10449_c1_g1	GAGGCTGGATGTGGCATTAT	59.923	20	TCACTGTCTGCTGTGCTGTT	58.124	20	242	1149	1390	GAGGCTGGATGTGGCATTAT	59.923	20	GTCACTGTCTGCTGTGCTGTT	59.117	21	243	1149	1391	TCTCTCTCTCCCTCTGTCGC	59.817	20	TCACTGTCTGCTGTGCTGTT	58.124	20	173	1218	1390
TR48786_c9_g1	GTAAATTTGAGGCCCAACCC	60.542	20	ACCTTGCCAAAAAGCAAAAA	59.736	20	198	304	501	GTAAATTTGAGGCCCAACCC	60.542	20	AACCTTGCCAAAAAGCAAAA	59.736	20	199	304	502	GGTAAATTTGAGGCCCAACC	60.542	20	ACCTTGCCAAAAAGCAAAAA	59.736	20	199	303	501
TR48786_c9_g1	TTTTTGCTTTTTGGCAAGGT	59.736	20	TTTTGAAACGAAAATGGCCT	59.564	20	210	482	691	TTTTGCTTTTTGGCAAGGTT	59.736	20	TTTTGAAACGAAAATGGCCT	59.564	20	209	483	691	TTTTTGGCAAGGTTGGACAT	60.344	20	TTTTGAAACGAAAATGGCCT	59.564	20	203	489	691
TR40222_c0_g1	TTTCCAGCAGTTTTGAAGCA	59.585	20	GATGTCGATCAAGGTCCGTT	59.934	20	179	49	227	TTCCAGCAGTTTTGAAGCAA	59.585	20	GATGTCGATCAAGGTCCGTT	59.934	20	178	50	227	TTTCCAGCAGTTTTGAAGCA	59.585	20	AGATGTCGATCAAGGTCCGT	59.535	20	180	49	228
TR41316_c0_g1	TACAGCCCATTCCTCCTCTG	60.21	20	CTGGTCGCTCATGTGGTAAA	59.716	20	274	1482	1755	TGTCTGCCAGTATTGCAACC	59.722	20	CTGGTCGCTCATGTGGTAAA	59.716	20	137	1619	1755	GGGGATATTAGCAGTGCAGC	59.696	20	CTGGTCGCTCATGTGGTAAA	59.716	20	218	1538	1755
TR19058_c0_g1	AGGGATGTTCGTCGGTATCA	60.34	20	CAGTCGTTGCTGCAGTGTTT	60.096	20	228	235	462	TCAAGCCTGAAGGAAACGTC	60.375	20	TCACGGTGATCATCGGACTA	60.072	20	191	109	299	GCATTCTGGGGTTTACTTGC	59.574	20	TCACGGTGATCATCGGACTA	60.072	20	234	66	299
TR10631_c1_g1	TGGTTGTGGAAACAAGGTGA	59.976	20	GCAAGTTCTGGCTGGCTAAG	60.154	20	143	209	351	TGGTTGTGGAAACAAGGTGA	59.976	20	AGCAAGTTCTGGCTGGCTAA	60.154	20	144	209	352	TGGTTGTGGAAACAAGGTGA	59.976	20	GACGTGCTGTCAAACGTCAT	59.758	20	240	209	448
TR10631_c1_g1	GGATGAAAGCTCCGAGTCAG	59.95	20	TTCAGGCCTCAATATCAGTGG	60.081	21	161	2894	3054	ACAGGGCTGAAAGCAGAGAA	60.134	20	TTCAGGCCTCAATATCAGTGG	60.081	21	268	2787	3054	AGGGCTGAAAGCAGAGAACA	60.134	20	TTCAGGCCTCAATATCAGTGG	60.081	21	266	2789	3054
TR40963_c0_g1	CAGCGATTTCGTTGTCAGAA	59.988	20	ACCGAAGACTCCGCATGAT	60.639	19	241	637	877	ACAGCGATTTCGTTGTCAGA	59.445	20	ACCGAAGACTCCGCATGAT	60.639	19	242	636	877	CAGCGATTTCGTTGTCAGAA	59.988	20	CCGAAGACTCCGCATGAT	59.743	18	240	637	876
TR51370_c2_g2	TTTGGCTTCTGCTAACCGAT	59.845	20	GCACCATGATGTTGACATTTCT	59.866	22	265	380	644	TCTTTGCTTTGGCTTCTGCT	60.27	20	GCACCATGATGTTGACATTTCT	59.866	22	272	373	644	CTCTTTGCTTTGGCTTCTGC	60.27	20	GCACCATGATGTTGACATTTCT	59.866	22	273	372	644
TR51541_c0_g1	GTTAACCGCCATGTCAAGGT	59.859	20	TACCCAGACTGTGTCCAGCA	60.309	20	260	5	264	GTTAACCGCCATGTCAAGGT	59.859	20	GAACCAGTCCGAGGAAATTG	59.526	20	192	5	196	CGCCATGTCAAGGTCATGTA	60.539	20	TACCCAGACTGTGTCCAGCA	60.309	20	254	11	264
TR48626_c0_g1	TTTGCCACAGTTTCCATTCA	60.088	20	GTTTGCCGCAATCTCACTTT	60.257	20	174	2750	2923	TCCATTCAGTCAGCGAGCTA	59.697	20	GTTTGCCGCAATCTCACTTT	60.257	20	162	2762	2923	TTGCCACAGTTTCCATTCAG	59.691	20	GTTTGCCGCAATCTCACTTT	60.257	20	173	2751	2923
TR37100_c0_g1	GAACCGACACAAATCCCTGT	59.827	20	TCCTTCCTCCAAGCAGAAGA	60.065	20	261	504	764	GAACCGACACAAATCCCTGT	59.827	20	TTTCCTTCCTCCAAGCAGAA	59.926	20	263	504	766	TATTCCTGAGGAGGGCGTAA	59.662	20	CACTTTGCCTGTTTCCCAAT	59.971	20	142	667	808
TR56787_c1_g1	GCGCAGAAATTGGAAAGAAA	60.323	20	TGCGATCTGAGACCAGTCAA	60.557	20	239	903	1141	GCGCAGAAATTGGAAAGAAA	60.323	20	TTGCGATCTGAGACCAGTCA	60.557	20	240	903	1142	GCGCAGAAATTGGAAAGAAA	60.323	20	GCTTGCGATCTGAGACCAGT	60.564	20	242	903	1144
TR38276_c8_g1	GCCCTAATTGATGCTTGAACA	60.089	21	GATATTGGGGGTGAAGGGTT	59.881	20	217	733	949	GCCCTAATTGATGCTTGAACA	60.089	21	CAGGATCTACACTGGTCGCA	59.855	20	251	733	983	GCCCTAATTGATGCTTGAACA	60.089	21	GGATCTACACTGGTCGCACA	59.707	20	249	733	981
TR2189_c0_g1	TCAGCCAGTTGCTTATCCCT	59.836	20	CTGGTTGAGACCTGCACAGA	60.022	20	204	1776	1979	CAGCCAGTTGCTTATCCCTC	59.836	20	CTGGTTGAGACCTGCACAGA	60.022	20	203	1777	1979	CTCAGCCAGTTGCTTATCCC	59.836	20	CTGGTTGAGACCTGCACAGA	60.022	20	205	1775	1979
TR2189_c0_g1	TCTGTGCAGGTCTCAACCAG	60.022	20	CTGGCGACAGTGACATGAGT	59.897	20	255	1960	2214	GTGCAGGTCTCAACCAGGAT	60.12	20	CTGGCGACAGTGACATGAGT	59.897	20	252	1963	2214	TCTGTGCAGGTCTCAACCAG	60.022	20	AGAATGAAGATGCTGGCGAC	60.37	20	267	1960	2226
TR2189_c0_g1	GCTCTCCTCCTCTGAACCCT	59.952	20	CCGCAAGCAGGAGAAGTTAC	60.015	20	271	2306	2576	GCTCTCCTCCTCTGAACCCT	59.952	20	AATGGAAGAAACAACAGCCG	60.11	20	110	2306	2415	GCTCTCCTCCTCTGAACCCT	59.952	20	CATCCAATCACCAGGGAAAC	60.173	20	217	2306	2522
TR28333_c1_g1	CAATCTGCGACCAGTGTTTG	60.301	20	TGGTCAAAGTCATGTCAGACC	58.553	21	176	1585	1760	GCTGTTAACTAGCAACCGCA	59.136	20	TGGTCAAAGTCATGTCAGACC	58.553	21	208	1553	1760	CAATCTGCGACCAGTGTTTG	60.301	20	ATGGTCAAAGTCATGTCAGACC	58.92	22	177	1585	1761
TR43051_c0_g1	GAAATGCTAATTGGCGATGAA	60.054	21	TCGAATCCAAACATCAATGC	59.48	20	224	40	263	GCAGCGGCAATAAAATGAAA	61.071	20	TCGAATCCAAACATCAATGC	59.48	20	193	71	263	GCAGCGGCAATAAAATGAA	59.795	19	TCGAATCCAAACATCAATGC	59.48	20	193	71	263
TR25309_c0_g1	TTAGGTCCAAGGCCAATGTC	59.933	20	TAGGAGGCTTTTGCGTGATT	59.845	20	151	787	937	GTCTGTTAGGTCCAAGGCCA	60.111	20	TAGGAGGCTTTTGCGTGATT	59.845	20	156	782	937	TTAGGTCCAAGGCCAATGTC	59.933	20	CTAGGAGGCTTTTGCGTGAT	59.476	20	152	787	938
TR22751_c0_g1	TGCCATTAAGGGTGCTAAAA	58.304	20	CAACTTTTCCTGCGAGGTTC	59.853	20	150	664	813	TGCCATTAAGGGTGCTAAAA	58.304	20	TGCGAGGTTCCCTAAGTGAT	59.694	20	140	664	803	GTGCCATTAAGGGTGCTAAAA	59.133	21	CAACTTTTCCTGCGAGGTTC	59.853	20	151	663	813
TR29013_c0_g1	ACAACTGTCAGCTGGTGTGC	59.948	20	GCCTTGAGCACATTTTCCAT	60.081	20	173	200	372	GCTGGATGGGAGTTGATTGT	59.934	20	GCCTTGAGCACATTTTCCAT	60.081	20	272	101	372	AGAAAGGCTGGATGGGAGTT	60.074	20	GCCTTGAGCACATTTTCCAT	60.081	20	278	95	372
TR20986_c0_g1	AAAACTGCGCCAATTTATGC	60.102	20	AGAGGGAACATTGAAAGCCA	59.67	20	255	461	715	AAAACTGCGCCAATTTATGC	60.102	20	GAGGGAACATTGAAAGCCAC	59.532	20	254	461	714	AAAACTGCGCCAATTTATGC	60.102	20	GGGAACATTGAAAGCCACTG	60.495	20	252	461	712
TR3239_c0_g1	CATGCTTTCAATTCCCGATT	59.901	20	AGATGCATATAAATATTGACTCAGATG	57.139	27	206	6807	7012	CTGTGGTCACTGGCAACACT	59.782	20	AGATGCATATAAATATTGACTCAGATG	57.139	27	247	6766	7012	CGAACCATGCTTTCAATTCC	60.448	20	AGATGCATATAAATATTGACTCAGATG	57.139	27	211	6802	7012
TR21711_c0_g2	GTTTGCATCCTGGTGAACCT	59.973	20	CTGTGATGGCTGCTCTGGTA	60.008	20	217	1260	1476	GTTTGCATCCTGGTGAACCT	59.973	20	AGGTCTGTGATGGCTGCTCT	60.017	20	221	1260	1480	GTTTGCATCCTGGTGAACCT	59.973	20	ACCTATTGCAGGATTGTGCC	59.962	20	167	1260	1426
TR7532_c0_g2	TTCGAATCCTGGTCCCAATA	60.266	20	TCGCAAGCAAATGACCTACA	60.401	20	120	1426	1545	TTCGAATCCTGGTCCCAATA	60.266	20	AACTCGGCTTGTTTTGCTTG	60.42	20	223	1426	1648	TTCGAATCCTGGTCCCAATA	60.266	20	CAAACTCGGCTTGTTTTGCT	60.42	20	225	1426	1650
TR26017_c0_g1	TCTGAAGGCTGGAATATGGG	60.029	20	CAGTTTCTGCACCGATTCCT	60.255	20	155	699	853	TCTGAAGGCTGGAATATGGG	60.029	20	TTTCTGCACCGATTCCTTTT	59.685	20	152	699	850	TCTGAAGGCTGGAATATGGG	60.029	20	TTCTGCACCGATTCCTTTTT	59.685	20	151	699	849
TR48684_c0_g2	TTTTGTGATTTGCCTCTCCC	60.051	20	TCAGTTCCGGATGATGAAGA	59.166	20	161	442	602	TTTTGTGATTTGCCTCTCCC	60.051	20	TTCCGGATGATGAAGACAAA	59.049	20	157	442	598	TGTGATTTGCCTCTCCCTCT	59.803	20	TCAGTTCCGGATGATGAAGA	59.166	20	158	445	602
TR7327_c1_g4	AACCAAATGCCTGAGGTTTG	59.971	20	TGCCACACACATCCTCTCTT	59.261	20	277	62	338	AACCAAATGCCTGAGGTTTG	59.971	20	AGCTGCCACACACATCCTCT	60.894	20	280	62	341	AACCAAATGCCTGAGGTTTG	59.971	20	TTGATAAACCCCTTCCTTGG	58.876	20	208	62	269
TR8172_c0_g1	TGATGGCATCGATGAAGATG	60.596	20	TGGCTCACTATCACTGACTTCC	59.357	22	268	833	1100	AGTGATGGCATCGATGAAGA	59.197	20	TGGCTCACTATCACTGACTTCC	59.357	22	270	831	1100	GGCATCGATGAAGATGACATT	59.915	21	TGGCTCACTATCACTGACTTCC	59.357	22	264	837	1100
TR8172_c0_g1	TGATGGTGACAGTGCAGATG	59.213	20	TGGAAGTTCTTATGTCTGCTTCA	59.031	23	278	1187	1464	TGATGGTGACAGTGCAGATG	59.213	20	TTTTTGCTTAGACTTCGATCACTG	59.952	24	186	1187	1372	TGATGGTGACAGTGCAGATG	59.213	20	TGGAAGTTCTTATGTCTGCTTCAC	59.825	24	278	1187	1464
TR35295_c0_g3	GCAGTTCCGAATCACATCAA	59.654	20	GGTTCCGGATCGGGTATTAT	59.873	20	172	844	1015	GCAGTTCCGAATCACATCAA	59.654	20	TCCGGATCGGGTATTATCTG	59.739	20	169	844	1012	GCAGTTCCGAATCACATCAA	59.654	20	CTGTTGTTTTCGATGCGTTG	60.293	20	211	844	1054
TR35352_c0_g1	CCAAGAGTGCAAGGTCACAA	59.873	20	CGACCTGTCTCGTGGTTTCT	60.298	20	107	979	1085	TCTGCCAATGAAACCAGTCA	60.24	20	ATTTCGACCTGTCTCGTGGT	59.579	20	155	935	1089	GCTTCCAAGAGTGCAAGGTC	59.997	20	TTCGACCTGTCTCGTGGTTT	60.69	20	113	975	1087
TR43936_c0_g1	TGTTCTTTGCTAGAAGTTGCG	58.384	21	TGGCTCACAAACTTGTGCTT	59.49	20	248	875	1122	TGTTCTTTGCTAGAAGTTGCGT	59.223	22	TGGCTCACAAACTTGTGCTT	59.49	20	248	875	1122	AATGTTCTTTGCTAGAAGTTGCG	59.965	23	TGGCTCACAAACTTGTGCTT	59.49	20	250	873	1122
TR43936_c0_g1	TGTTCTTTGCTAGAAGTTGCG	58.384	21	TGGCTCACAAACTTGTGCTT	59.49	20	248	875	1122	TTGGGGAACTATTAGGTGGA	57.007	20	TGGCTCAAACGAACCTTTCT	59.853	20	262	932	1193	TTGGGGAACTATTAGGTGGA	57.007	20	CTGGCTCAAACGAACCTTTC	59.853	20	263	932	1194
TR15405_c0_g1	GGTTCCCCTGTGTGGTCTTA	59.82	20	TATTGGCAGTGGCAAACAAA	60.111	20	198	145	342	GGTTCCCCTGTGTGGTCTTA	59.82	20	AAATCTCGCCCACCATACAC	59.82	20	252	145	396	GGTTCCCCTGTGTGGTCTTA	59.82	20	CTATTGGCAGTGGCAAACAA	59.729	20	199	145	343
TR24913_c0_g1	ACGTTTTGCTGCACAGTGTC	59.953	20	AGAAAACAAGATGGCATCCG	60.074	20	174	981	1154	GGAGTGCAAGTCCACCTGTT	60.159	20	AGAAAACAAGATGGCATCCG	60.074	20	266	889	1154	ATGTTCACGTTTTGCTGCAC	59.77	20	AGAAAACAAGATGGCATCCG	60.074	20	180	975	1154
TR41329_c0_g1	TGCACTTCCATAACTGCTCG	60.011	20	TATTTGAGTCACGTCGCAGG	59.864	20	141	63	203	GGTCTATTGGCAGCTCAAGG	59.836	20	TATTTGAGTCACGTCGCAGG	59.864	20	193	11	203	GGGTCTATTGGCAGCTCAAG	59.836	20	TATTTGAGTCACGTCGCAGG	59.864	20	194	10	203
TR46759_c0_g1	TTATGCCACAAGGTGACAGC	59.722	20	CAAGCAATGCACCACCTTTA	59.729	20	230	295	524	TTATGCCACAAGGTGACAGC	59.722	20	GCCGCTTTAAAGTCAAGCAA	60.508	20	243	295	537	TTATGCCACAAGGTGACAGC	59.722	20	AGTCAAGCAATGCACCACCT	60.721	20	233	295	527
TR51786_c3_g7	TCCAAGCTGCTTTTTGTGTG	60.027	20	CAGAAAACCGTACCGGACAT	59.853	20	242	1098	1339	AGCTGCTTTTTGTGTGGCTT	60.059	20	CAGAAAACCGTACCGGACAT	59.853	20	238	1102	1339	AAGCTGCTTTTTGTGTGGCT	60.059	20	CAGAAAACCGTACCGGACAT	59.853	20	239	1101	1339
TR17342_c4_g2	GCTTTATTTTGACACCCGGA	59.938	20	AAGGTAATTCATAGCCCCAGC	59.476	21	226	337	562	GCTTTATTTTGACACCCGGA	59.938	20	AGGTAATTCATAGCCCCAGC	58.162	20	225	337	561	TTTGACACCCGGATTAGACA	58.973	20	AAGGTAATTCATAGCCCCAGC	59.476	21	219	344	562
TR4176_c0_g1	TCGTAGATCACCTGCTTTCAA	58.515	21	CAAAACATTTCACAGACCTGAA	57.786	22	212	645	856	TCGTAGATCACCTGCTTTCAA	58.515	21	AAAACATTTCACAGACCTGAACA	58.663	23	211	645	855	TCGTAGATCACCTGCTTTCAA	58.515	21	CAAAACATTTCACAGACCTGAAC	58.663	23	212	645	856
TR11095_c0_g1	ACGAACAAGAAACTGGAGCG	60.431	20	AGTAAGGTTCCACCGTCGTG	60.028	20	245	311	555	TGACAACGTGCAGTGGATTT	60.16	20	CTTTCCCTAACCATGACCCC	60.549	20	186	246	431	TGACAACGTGCAGTGGATTT	60.16	20	TTTCCCTAACCATGACCCCT	60.549	20	185	246	430
TR36745_c0_g2	GTAGTTTAGCGCCACCAGGA	60.27	20	TGCGTTTACAAAGTGGCAAG	59.911	20	254	565	818	TAGTTTAGCGCCACCAGGAC	60.27	20	TGCGTTTACAAAGTGGCAAG	59.911	20	253	566	818	TAGTTTAGCGCCACCAGGAC	60.27	20	CTTGCTGGACAAGCCAATTT	60.249	20	108	566	673
TR32744_c0_g1	CCAAGGTATGCCGCTTATTC	59.569	20	TGTGTGTTCATTTTCGCCTT	59.174	20	261	166	426	CCAAGGTATGCCGCTTATTC	59.569	20	TGCTGTGTGTTCATTTTCGC	60.855	20	264	166	429	GGTATGCCGCTTATTCAACG	60.476	20	TGTGTGTTCATTTTCGCCTT	59.174	20	257	170	426
TR7486_c0_g1	TGTGCATTTCAGTGTCAGTCA	58.855	21	AAGGGAAACGAAAACCTCAGA	60.096	21	246	1203	1448	TTTGTGTGCATTTCAGTGTCAG	59.805	22	AAGGGAAACGAAAACCTCAGA	60.096	21	250	1199	1448	GTGTGCATTTCAGTGTCAGTCA	59.801	22	AAGGGAAACGAAAACCTCAGA	60.096	21	247	1202	1448
TR6587_c13_g1	TCACTGGTCACCCACATGAT	59.801	20	CACATGGTTTCAAATGCAATG	59.841	21	193	573	765	TCACTGGTCACCCACATGAT	59.801	20	CATGGTTTCAAATGCAATGAG	59.027	21	191	573	763	TTCACTGGTCACCCACATGA	61.015	20	CACATGGTTTCAAATGCAATG	59.841	21	194	572	765
TR6150_c0_g1	TCATAGCATTGTAAAGTTACTGAAATC	57.338	27	CCCTTCAGCCATTTAAGCTG	59.839	20	268	24	291	TCATAGCATTGTAAAGTTACTGAAATC	57.338	27	TGTCTTCCCTTCAGCCATTT	59.67	20	274	24	297	TCATAGCATTGTAAAGTTACTGAAATC	57.338	27	TTGTCTTCCCTTCAGCCATT	59.67	20	275	24	298
TR24409_c0_g1	GATTCCAACGGGCAATACAG	60.331	20	TTCACATTTTTACCTTTGTTTCCA	59.797	24	217	119	335	GATTCCAACGGGCAATACAG	60.331	20	TCACATTTTTACCTTTGTTTCCA	58.577	23	216	119	334	ACACGATTTGCAACGATTCC	60.905	20	TTCACATTTTTACCTTTGTTTCCA	59.797	24	231	105	335
TR10430_c1_g1	GCACAGGAAGGCGGTATTTA	60.096	20	TAGGTTCAGGAGTGGGAGCA	60.791	20	219	1963	2181	TCAGTGGTGTCCAGTTCAGC	59.872	20	TAGGTTCAGGAGTGGGAGCA	60.791	20	237	1945	2181	GGCTTCAGTGGTGTCCAGTT	60.159	20	TAGGTTCAGGAGTGGGAGCA	60.791	20	241	1941	2181
TR38249_c1_g1	AGGAAAATGTTTCGGAGGCT	60.074	20	TTCCTCAAATTTCAAAGGCG	60.181	20	254	1498	1751	AGGAAAATGTTTCGGAGGCT	60.074	20	TCCTCAAATTTCAAAGGCGT	59.685	20	253	1498	1750	GAAAATGTTTCGGAGGCTTG	59.685	20	TTCCTCAAATTTCAAAGGCG	60.181	20	252	1500	1751
TR38249_c1_g1	CGCCTTTGAAATTTGAGGAA	60.181	20	ATTTTCACCACAGTGAGGGC	59.973	20	272	1732	2003	ACGCCTTTGAAATTTGAGGA	59.685	20	ATTTTCACCACAGTGAGGGC	59.973	20	273	1731	2003	GCATATCATGAGGTGGGGTT	59.635	20	ATTTTCACCACAGTGAGGGC	59.973	20	246	1758	2003
TR38249_c1_g1	CTTGCCGATGCACTATCAGA	59.972	20	GTTTGTTGCAGCATGATTGG	60.119	20	231	3020	3250	TGTTGAACACCCCTCATCAA	59.935	20	GTTTGTTGCAGCATGATTGG	60.119	20	193	3058	3250	CAGCCGTGTCTAATTCACCA	59.716	20	ACTGGTAACTGGTTGAGCCG	60.171	20	245	3163	3407
TR36016_c4_g1	TCCAACATTGGAGCCCTAAC	59.933	20	GAGCAACATTTGCTGATCTGA	59.016	21	242	1925	2166	CATTGGAGCCCTAACGATTT	59.043	20	GAGCAACATTTGCTGATCTGA	59.016	21	237	1930	2166	CAACATTGGAGCCCTAACGA	61.021	20	GAGCAACATTTGCTGATCTGA	59.016	21	240	1927	2166
TR21419_c0_g1	CAGTTGGAAGAAGACATTCTGG	58.837	22	AAAAAGTGCTGCTTGTAGAAACATT	59.799	25	119	32	150	CAGTTGGAAGAAGACATTCTGG	58.837	22	TGTGTCAAAATTATGTCGAGTTG	57.76	23	164	32	195	CAGTTGGAAGAAGACATTCTGG	58.837	22	CTGTGTCAAAATTATGTCGAGTTG	58.745	24	165	32	196
TR21419_c0_g1	TTTGACCAAATATGCTGCCA	60.073	20	ACCAGCTTTTGGCTTTGCTA	60.018	20	185	2221	2405	ATCCTGTCAAACCACCCAAG	59.82	20	ACCAGCTTTTGGCTTTGCTA	60.018	20	131	2275	2405	CCAAATCCTGTCAAACCACC	60.21	20	GCTCTGGTTTGAGTCTTGGC	59.997	20	244	2271	2514
TR21419_c0_g1	GCCAAGACTCAAACCAGAGC	59.997	20	TAATTTTGGCACACCAGCAA	60.111	20	256	2495	2750	GCCAAGACTCAAACCAGAGC	59.997	20	TTAATTTTGGCACACCAGCA	60.111	20	257	2495	2751	GCCAAGACTCAAACCAGAGC	59.997	20	GCAACATCAGCAACACCATC	60.128	20	240	2495	2734
TR56867_c2_g1	CCAAAATCAGCACTTCTTGGT	59.228	21	TCAAGACCCAGTAACCCGAC	59.966	20	205	527	731	CCAAAATCAGCACTTCTTGGT	59.228	21	ATAGCAGTGGTGGAGGATGC	60.104	20	125	527	651	TGACATGAATGGCTAACAGGA	59.138	21	ATAGCAGTGGTGGAGGATGC	60.104	20	208	444	651
TR52025_c0_g1	CAAAAGAAACCAGAAACACATGA	59.164	23	TTGAATGGAGTACCATCTGCTG	60.132	22	195	609	803	CAAAAGAAACCAGAAACACATGA	59.164	23	TGAATGGAGTACCATCTGCTG	58.736	21	194	609	802	AACACAAAAGAAACCAGAAACACA	59.982	24	TTGAATGGAGTACCATCTGCTG	60.132	22	199	605	803
TR9867_c0_g1	TCGAAAGGGCATTAATCGAG	60.167	20	GGCTGAATCTCATGGGTCAT	59.893	20	187	916	1102	CGAAAGGGCATTAATCGAGA	60.167	20	GGCTGAATCTCATGGGTCAT	59.893	20	186	917	1102	CGAAAGGGCATTAATCGAGA	60.167	20	GATAAGCCCAGGAAACCCAT	60.152	20	210	917	1126
TR39303_c1_g2	CCCTTCCCCAGTTAATCACA	59.784	20	TGTTGGAAAGCAAAGCTAGG	58.174	20	242	563	804	TTCCCTTCCCCAGTTAATCA	59.359	20	TGTTGGAAAGCAAAGCTAGG	58.174	20	244	561	804	CCCTTCCCCAGTTAATCACA	59.784	20	ATGTTGGAAAGCAAAGCTAGG	58.528	21	243	563	805
TR44268_c0_g1	TGTCCATGTCCTTGTTGGAA	59.935	20	CACAACTGATCACGGAAGTCA	59.736	21	230	516	745	TGTCCATGTCCTTGTTGGAA	59.935	20	GCACAACTGATCACGGAAGT	58.727	20	231	516	746	GTGCAAACACAGCGAGTCAT	59.912	20	CACAACTGATCACGGAAGTCA	59.736	21	249	497	745
TR38939_c0_g1	TTCGACTTTACGAAAACAAAATGA	60.038	24	TGAGATCTGCGTCTAGTCTCCA	60.156	22	262	934	1195	TCGACTTTACGAAAACAAAATGA	58.839	23	TGAGATCTGCGTCTAGTCTCCA	60.156	22	261	935	1195	TTTCGACTTTACGAAAACAAAATG	59.607	24	TGAGATCTGCGTCTAGTCTCCA	60.156	22	263	933	1195
TR50608_c0_g1	CAATGAGGATATGCAAGCGA	59.792	20	TACCTGCTCCACTCCAATCC	60.073	20	193	1324	1516	CAATGAGGATATGCAAGCGA	59.792	20	CACTCCAATCCCTGATTCGT	59.927	20	184	1324	1507	AGATTTGACGAATTGGCTGC	60.221	20	TACCTGCTCCACTCCAATCC	60.073	20	229	1288	1516
TR23501_c0_g1	CCGCTATGCATTATGAGCTG	59.448	20	TCCATTCTCCCAAACTTTTCA	59.532	21	220	182	401	CCGCTATGCATTATGAGCTGT	60.265	21	TCCATTCTCCCAAACTTTTCA	59.532	21	220	182	401	ACCGCTATGCATTATGAGCTG	60.265	21	TCCATTCTCCCAAACTTTTCA	59.532	21	221	181	401
TR2290_c0_g1	TGCTTCATGTTCCCAAACAG	59.691	20	AACGCTTTAACAGGTGAGTGC	59.438	21	213	1783	1995	CAGATGCTTCATGTTCCCAA	59.648	20	AACGCTTTAACAGGTGAGTGC	59.438	21	217	1779	1995	TGCTTCATGTTCCCAAACAG	59.691	20	ACGCTTTAACAGGTGAGTGC	58.036	20	212	1783	1994
TR3137_c0_g2	TCCGGATCTACAATTTTCGC	60.038	20	TGGATCATTGGAATTTGCAT	58.77	20	262	35	296	GGATCTACAATTTTCGCCCA	59.901	20	TGGATCATTGGAATTTGCAT	58.77	20	259	38	296	ATTTTCGCCCACCACATAAA	60.188	20	TGGATCATTGGAATTTGCAT	58.77	20	250	47	296
TR56024_c0_g1	AGTTGATCTGAAACAGCCCC	59.141	20	AAGCATTGCACTGTCTTTTGAA	59.926	22	265	898	1162	CCACCCCTACACCCAAGATT	60.988	20	AAGCATTGCACTGTCTTTTGAA	59.926	22	247	916	1162	AGTTGATCTGAAACAGCCCC	59.141	20	GCATTGCACTGTCTTTTGAAAC	59.797	22	263	898	1160
TR17584_c0_g1	TGTGGAGACTTCGACGGTAA	59.288	20	CGGTGCATACACAGAGAACG	60.324	20	232	61	292	TTCATCTACCCCTCTCCAGC	59.239	20	CGGTGCATACACAGAGAACG	60.324	20	277	16	292	GGCACTGTGACTTATGCTTCC	59.755	21	CTCCACTCCATCGGTCTGTT	60.112	20	267	109	375
TR21088_c0_g2	ACAACCCGCATACATTGCTT	60.395	20	GCACACATGATCGACAAAGG	60.12	20	151	1424	1574	ACAACCCGCATACATTGCTT	60.395	20	ACACATGATCGACAAAGGCA	60.12	20	149	1424	1572	ACAACCCGCATACATTGCTT	60.395	20	CACACATGATCGACAAAGGC	60.12	20	150	1424	1573
TR45839_c1_g1	TTCTGGCATCGGAGAGAAGT	59.95	20	CGGACATGACATCATTCAGC	60.08	20	274	745	1018	TTCTGGCATCGGAGAGAAGT	59.95	20	TTCAGCATGGTGTTCCTTGA	60.24	20	260	745	1004	TTCTGGCATCGGAGAGAAGT	59.95	20	TCAGCATGGTGTTCCTTGAA	60.24	20	259	745	1003
TR6466_c0_g1	TGTTGGACTGTTTTCCGTGA	60.128	20	CAAATGGGTTGTGCATTTCT	58.476	20	209	458	666	CAATGGTCGTTGATTGTTGG	59.816	20	CAAATGGGTTGTGCATTTCT	58.476	20	223	444	666	TGTTGGACTGTTTTCCGTGA	60.128	20	ACAAATGGGTTGTGCATTTCT	59.35	21	210	458	667
TR57310_c0_g1	CGAGCGGACTGTCTGATGTA	60.008	20	GGCATGCAGCAGTATCAGAA	59.979	20	207	1688	1894	CGAGCGGACTGTCTGATGTA	60.008	20	GGCAGCAAAGGTTTCAGAAC	59.859	20	230	1688	1917	TGACGGATTGAGCTGTTGAC	59.837	20	GGCATGCAGCAGTATCAGAA	59.979	20	249	1646	1894
TR59033_c0_g1	ATTCTTGGTTCATTGGGTGC	59.797	20	AGCCCACTGTCACGTTTGAT	60.577	20	254	409	662	AACCCATGCTGTATTGTAGCG	60.032	21	TGTCTACACGATCCCCCTTC	59.927	20	254	544	797	AACCCATGCTGTATTGTAGCG	60.032	21	AGCCCTGGCTTAGTTTCCAT	60.096	20	196	544	739
TR55025_c0_g2	TGCCGCATAATACACTTGATTT	59.52	22	CCTACACTCGAGATTGTGCGT	60.328	21	197	869	1065	TGCCGCATAATACACTTGATTT	59.52	22	AACCCTCCTTCTTTTATCCCC	59.672	21	216	869	1084	TGCCGCATAATACACTTGATTT	59.52	22	CCCTCCTTCTTTTATCCCCT	58.528	20	214	869	1082
TR36761_c0_g1	TGTGGAAAGCCTTGTCTGTG	59.873	20	TGCCCAGAATTGTTTTTGAA	59.133	20	272	435	706	TGTGGAAAGCCTTGTCTGTG	59.873	20	TTGTTTTTGAATCTGGTTGGG	59.825	21	263	435	697	TGTGGAAAGCCTTGTCTGTG	59.873	20	TGTTTTTGAATCTGGTTGGG	58.448	20	262	435	696
TR55096_c0_g1	TGAGCAACAAGAAAAGAAACTCC	59.92	23	CCCAAGTACTTCAGCCTTGC	59.875	20	274	670	943	GAGCAACAAGAAAAGAAACTCCA	59.92	23	CCCAAGTACTTCAGCCTTGC	59.875	20	273	671	943	TTTGAAATTGAATGAAATTGGC	58.96	22	ATACCCGTTGGTCTGCATTC	59.82	20	229	575	803
TR52347_c0_g1	AACACTGTTGGAAGGATGTGC	60.028	21	TGCAGTTTGCAAAGAAACAGA	59.641	21	246	239	484	AACACTGTTGGAAGGATGTGC	60.028	21	TTGTTGCAGTTTGCAAAGAAA	59.518	21	250	239	488	ACACTGTTGGAAGGATGTGC	58.568	20	TGCAGTTTGCAAAGAAACAGA	59.641	21	245	240	484
TR16001_c0_g2	GCGAGGTTTTGGCTTGAAGT	61.669	20	ACAGAAACCCACGGTTTGAC	59.867	20	278	374	651	GCGAGGTTTTGGCTTGAAGT	61.669	20	CAACCCTCCAAGCTCTATGC	59.836	20	147	374	520	GCGAGGTTTTGGCTTGAAGT	61.669	20	TCACAATACAACACGCACGA	59.746	20	227	374	600
TR35988_c3_g3	TGAAGCACTGGTTCTTGTGG	59.873	20	TGATGGAATTACTTTGGCCTG	59.946	21	248	2746	2993	TGAAGCACTGGTTCTTGTGG	59.873	20	TGGAATTACTTTGGCCTGAA	58.214	20	245	2746	2990	TGAAGCACTGGTTCTTGTGG	59.873	20	TTTATGCAAGCATTTGATGGA	59.159	21	262	2746	3007
TR35988_c3_g3	AAATGGGGTTACCCTAACGG	59.939	20	ATCAGCAATCCCATACGAGC	60.066	20	156	3191	3346	AAATGGGGTTACCCTAACGG	59.939	20	CCATGAATTTTCCAGGCAAT	59.762	20	219	3191	3409	AAATGGGGTTACCCTAACGG	59.939	20	CGCCAAGTCAATACGATGAA	59.688	20	115	3191	3305
TR41184_c1_g1	GCCTCTGTGAAATGCTGTGA	59.992	20	TCATGTGGTAGTGGGCTTGA	60.112	20	266	48	313	TTTGCCTCTGTGAAATGCTG	59.988	20	TCATGTGGTAGTGGGCTTGA	60.112	20	269	45	313	GCCTCTGTGAAATGCTGTGA	59.992	20	GGTCATGTGGTAGTGGGCTT	59.851	20	268	48	315
TR30235_c0_g1	ACACAGGTTACATTTGGGGC	59.717	20	CACTTCAGTGCTTTCAGGACA	59.071	21	195	271	465	ATGCCAGTGATCCAGACCTC	60.08	20	TGTTTCTGCAGCAATAACCAC	58.836	21	277	378	654	ATGCCAGTGATCCAGACCTC	60.08	20	TGTTTCTGCAGCAATAACCACT	59.813	22	277	378	654
TR25507_c50_g10	CCATGGTTACCCATTCTCCA	60.572	20	ATACAAGCAGGTGCGAAAGC	60.416	20	272	579	850	CCATGGTTACCCATTCTCCA	60.572	20	AAAAAGGCATGCTGTGTTCA	59.322	20	149	579	727	CCATGGTTACCCATTCTCCA	60.572	20	TACAAGCAGGTGCGAAAGC	60.15	19	271	579	849
TR17353_c4_g2	ACCACATTTATTTCACCGAGA	57.079	21	TTCCATGGATCAAACAGTTTACA	59.37	23	234	40	273	TGAAATACCACATTTATTTCACCG	60.006	24	TTCCATGGATCAAACAGTTTACA	59.37	23	240	34	273	ACCACATTTATTTCACCGAGA	57.079	21	TCCATGGATCAAACAGTTTACA	57.999	22	233	40	272
TR23792_c1_g1	CAAACTCGGGGAGAAAACTG	59.705	20	ACACTCTTGCTTTTCGCCTC	59.621	20	124	400	523	CAGTCAAACTCGGGGAGAAA	60.224	20	CTTTTCGCCTCCTCCAAGTA	59.448	20	119	396	514	CAGTCAAACTCGGGGAGAAA	60.224	20	TTTTCGCCTCCTCCAAGTAG	59.448	20	118	396	513
TR31982_c1_g1	CCATCAAATATCATGCTGCTG	59.151	21	TCCCATGAATAAAAGGAGGAA	58.495	21	181	4907	5087	ACCATCAAATATCATGCTGCTG	59.988	22	TCCCATGAATAAAAGGAGGAA	58.495	21	182	4906	5087	CCATCAAATATCATGCTGCTG	59.151	21	TCCCATGAATAAAAGGAGGA	57.066	20	181	4907	5087
TR31982_c1_g1	AATTACGATCGAAGTTGCCG	60.096	20	ATTGGCTACAAAAATTGGCG	59.964	20	261	6427	6687	GGTCAATTAACAGCAGGCGT	60.14	20	ATTGGCTACAAAAATTGGCG	59.964	20	146	6542	6687	GGTCAATTAACAGCAGGCGT	60.14	20	TTTGGCGATTATTTCCAAGG	59.901	20	166	6542	6707
TR31096_c0_g1	GGTGTGTCTGTACAGGAAAGGG	60.827	22	GCCTTTTTGCCTTTTACCAA	59.231	20	188	10	197	GGTGTGTCTGTACAGGAAAGGG	60.827	22	AGCCTTTTTGCCTTTTACCAA	60.115	21	189	10	198	GGTGTGTCTGTACAGGAAAGGG	60.827	22	AGCCTTTTTGCCTTTTACCA	58.875	20	189	10	198
TR23090_c0_g1	GCTGCAGTAGCAGCATCATC	59.735	20	GATCCTATTGATGATAATGATTGAAG	57.296	26	120	1054	1173	GCTGCAGTAGCAGCATCATC	59.735	20	AGATCCTATTGATGATAATGATTGAA	57.296	26	121	1054	1174	GCTGCAGTAGCAGCATCATC	59.735	20	AGATCCTATTGATGATAATGATTGAAG	58.178	27	121	1054	1174
TR40055_c0_g3	CAACGCTGATACACGGAAGA	59.864	20	AAGCATGTGCAAGAAAAGCA	59.614	20	259	2617	2875	CAACGCTGATACACGGAAGA	59.864	20	CAAGCATGTGCAAGAAAAGC	59.614	20	260	2617	2876	CAACGCTGATACACGGAAGA	59.864	20	AGCACGTGCATGAATAAGCA	60.432	20	243	2617	2859
TR33177_c0_g1	CTGGGGCTCTTCTCTCCTTT	59.95	20	GGCTTCAGCGATCAAGAAAC	59.962	20	244	1445	1688	CTGGGGCTCTTCTCTCCTTT	59.95	20	CAGGTTCGGGAAGTTCTCAG	59.837	20	211	1445	1655	TGCAGTAAGTGAGCTCGGTG	60.199	20	GGCTTCAGCGATCAAGAAAC	59.962	20	143	1546	1688
TR120_c0_g1	TAATGTTGTTGCCCTCCACA	59.964	20	ATGGGTCACACGTGCAATAA	59.847	20	258	1106	1363	TAATGTTGTTGCCCTCCACA	59.964	20	TCACACGTGCAATAAAAGGC	59.735	20	253	1106	1358	TAATGTTGTTGCCCTCCACA	59.964	20	GGGTCACACGTGCAATAAAA	59.444	20	256	1106	1361
TR17335_c0_g12	TCTTTTTCTCCATTGGTGCC	60.051	20	TGGTGAATCCGATCTTGACA	60.048	20	218	8524	8741	ATGGATCAACTTCCTGTCGG	59.927	20	TGGTGAATCCGATCTTGACA	60.048	20	245	8497	8741	TCTTTTTCTCCATTGGTGCC	60.051	20	TACAAGCAAAAACTGCCACG	59.911	20	268	8524	8791
TR23377_c0_g2	CACCAACAGCCAAGGAAACT	60.149	20	TTGAGCCAGTGACATTGCAG	61.023	20	226	85	310	CACCAACAGCCAAGGAAACT	60.149	20	TGAGCCAGTGACATTGCAG	59.531	19	225	85	309	CACCAACAGCCAAGGAAACT	60.149	20	AATGGTTGAGCCAGTGACATT	59.468	21	231	85	315
TR48736_c0_g1	CATGCTGAGAAGGGAAGGAG	59.943	20	CAACTCGAATTGGAGGGAAG	59.665	20	182	2194	2375	GGGAAGGAGTGCGTAAACAA	60.11	20	CAACTCGAATTGGAGGGAAG	59.665	20	171	2205	2375	TGAGGAAACTGCATGCTGAG	60.136	20	CAACTCGAATTGGAGGGAAG	59.665	20	193	2183	2375
TR38304_c0_g1	ATGCTGCTGCTGTTGCTAAA	59.782	20	GCTTGGCTAACCAGTGCTTT	59.522	20	196	2467	2662	ATGCTGCTGCTGTTGCTAAA	59.782	20	TGGCTAACCAGTGCTTTGAA	59.464	20	193	2467	2659	AATGCTGCTGCTGTTGCTAA	59.782	20	TGGCTAACCAGTGCTTTGAA	59.464	20	194	2466	2659
TR38304_c0_g1	AACCCAGGCAGTTTAAGTGG	59.097	20	TCATCATCACTTGCATCATCAC	59.533	22	230	2742	2971	AACCCAGGCAGTTTAAGTGGT	59.914	21	TCATCATCACTTGCATCATCAC	59.533	22	230	2742	2971	CCCAGGCAGTTTAAGTGGTG	60.541	20	TTCTCATCATCACTTGCATCATC	60.096	23	231	2744	2974
TR38304_c0_g1	AGCATGGGACAAAAGCTCAG	60.397	20	CTCCTGATGGCCACTGTTTT	60.111	20	151	3035	3185	ATGGGACAAAAGCTCAGCAA	60.776	20	CTCCTGATGGCCACTGTTTT	60.111	20	148	3038	3185	CTTCAGCATGGGACAAAAGC	60.776	20	CTCCTGATGGCCACTGTTTT	60.111	20	155	3031	3185
TR51431_c0_g1	GGCTGGATTTTGTGGTGAGT	59.973	20	TCAGGGATACACAGCTCACG	59.855	20	217	1025	1241	AACAAGGGCTGGATTTTGTG	59.971	20	TCAGGGATACACAGCTCACG	59.855	20	223	1019	1241	TCACAGGGTTCATGGACAGA	60.088	20	TCAGGGATACACAGCTCACG	59.855	20	131	1111	1241
TR38479_c2_g1	TTGTCAGCGGTAGTCCACAG	59.897	20	TCCAGCACAGAAAAGCAAAA	59.585	20	263	94	356	TCAACAAAAGTTGTCAGCGG	59.881	20	TCCAGCACAGAAAAGCAAAA	59.585	20	273	84	356	GTTGTCAGCGGTAGTCCACA	59.751	20	TCCAGCACAGAAAAGCAAAA	59.585	20	264	93	356
TR38479_c2_g1	TTGTCAGCGGTAGTCCACAG	59.897	20	TCCAGCACAGAAAAGCAAAA	59.585	20	263	94	356	TCAACAAAAGTTGTCAGCGG	59.881	20	TCCAGCACAGAAAAGCAAAA	59.585	20	273	84	356	GTTGTCAGCGGTAGTCCACA	59.751	20	TCCAGCACAGAAAAGCAAAA	59.585	20	264	93	356
TR17258_c0_g1	CCAGGTGTGATCTGTAGCCA	59.701	20	AATGTGCACAGCCATTTGAA	60.119	20	185	469	653	CCAGGTGTGATCTGTAGCCA	59.701	20	GTGCACAGCCATTTGAAAAA	59.712	20	182	469	650	TCAAACTGGCCCTAAAAGCA	60.742	20	TGCACCAGCTTAACCAAACA	60.293	20	192	347	538
TR42080_c0_g1	AGCAACCAGTTGACCGATTT	59.598	20	GCATGCGTCTGACTGGAATA	59.83	20	181	18	198	CAACCAGTTGACCGATTTCA	59.541	20	GCATGCGTCTGACTGGAATA	59.83	20	179	20	198	AGCAACCAGTTGACCGATTT	59.598	20	GTTAGCATGCGTCTGACTGG	59.47	20	185	18	202
TR20704_c0_g1	TGGCATATAAAGTCCTGTCGG	59.967	21	CCTTATCTCAATTTCGATGGC	58.66	21	244	1379	1622	TCCTGTCGGATCTTTGACACT	59.712	21	CCTTATCTCAATTTCGATGGC	58.66	21	232	1391	1622	TCCTGTCGGATCTTTGACAC	58.643	20	CCTTATCTCAATTTCGATGGC	58.66	21	232	1391	1622
TR45839_c1_g2	TTCTGGCATCGGAGAGAAGT	59.95	20	CGGACATGACATCATTCAGC	60.08	20	277	745	1021	TTCTGGCATCGGAGAGAAGT	59.95	20	TTCAGCATGGTGTTCCTTGA	60.24	20	263	745	1007	TTCTGGCATCGGAGAGAAGT	59.95	20	TCAGCATGGTGTTCCTTGAA	60.24	20	262	745	1006
TR38750_c0_g2	TGCAAGGTTATTGAAATTGGA	58.148	21	GCCATGTTTCCTAGGTGTGG	60.375	20	154	148	301	CTGCAAGGTTATTGAAATTGGA	59.12	22	GCCATGTTTCCTAGGTGTGG	60.375	20	155	147	301	TGCAAGGTTATTGAAATTGGA	58.148	21	CAGCAGTGGTGGTAGCAGTG	60.523	20	246	148	393
TR38731_c0_g1	TGCAGGTTTAAGGCAAAATG	58.816	20	CCCGCACATGATTGTATTGT	59.276	20	264	1084	1347	CTGCAGGTTTAAGGCAAAATG	59.766	21	CCCGCACATGATTGTATTGT	59.276	20	265	1083	1347	TGCAGGTTTAAGGCAAAATGA	60.605	21	CCCGCACATGATTGTATTGT	59.276	20	264	1084	1347
TR35297_c1_g2	AGCAATTTGTTTTGCCACCT	59.615	20	CCACAAGATTTGGGGACGTA	60.745	20	270	2231	2500	TTAGCAATTTGTTTTGCCACC	59.992	21	CCACAAGATTTGGGGACGTA	60.745	20	272	2229	2500	AGCAATTTGTTTTGCCACCT	59.615	20	TGCAACTTTATATGCCTCCCA	60.462	21	238	2231	2468
TR23867_c1_g2	TGCTGTGTTCTCGTCGATTC	59.992	20	GCTGTCAAAATTCCCGTCAT	59.939	20	260	127	386	TGCTGTGTTCTCGTCGATTC	59.992	20	CGTCATCCAATCAAAATCCC	60.133	20	246	127	372	TGCTGTGTTCTCGTCGATTC	59.992	20	CCGTCATCCAATCAAAATCC	60.133	20	247	127	373
TR10418_c0_g1	TGGAGGAATTGCCTAATGTTG	59.946	21	CATCCATTTCCACATCTCCTG	60.324	21	260	409	668	TGGAGGAATTGCCTAATGTTG	59.946	21	TCCATTTCCACATCTCCTGTT	59.396	21	258	409	666	TGGAGGAATTGCCTAATGTTG	59.946	21	TCCATTTCCACATCTCCTGT	57.91	20	258	409	666
TR21652_c0_g1	CCATCACTGACCAGGTGTGA	60.59	20	TTTGGACCATTTCTGACTGG	58.541	20	112	319	430	CCATCACTGACCAGGTGTGA	60.59	20	GTTTGGACCATTTCTGACTGG	59.439	21	113	319	431	TTTTCTCCATCACTGACCAGG	60.096	21	TTTGGACCATTTCTGACTGG	58.541	20	118	313	430
TR48118_c1_g2	GTCGGGGTAGTTGTTGGAGA	59.966	20	CAACAAAACCAACGACAACG	60.043	20	226	1782	2007	GCGGGTGGTTGTTGAAATAC	60.235	20	CAACAAAACCAACGACAACG	60.043	20	272	1736	2007	ACAGAGACGTTCTTGTCGGG	60.298	20	ACAACGACGACAGCAACAAC	59.801	20	226	1768	1993
TR9224_c0_g1	GGAGCTACACTGGTTGCACA	59.905	20	AATGTCGGATTTCTGATGCC	59.9	20	108	36	143	TGGAGCTACACTGGTTGCAC	59.905	20	AATGTCGGATTTCTGATGCC	59.9	20	109	35	143	GGAGCTACACTGGTTGCACA	59.905	20	ACAACAACAACAGGGGTTCC	59.721	20	173	36	208
TR20204_c5_g1	AGGCACCATCGATTACACAA	59.002	20	GCTTCATTCATGCCACAAGA	59.805	20	276	870	1145	AGGCACCATCGATTACACAA	59.002	20	CACTGCTTCATTCATGCCAC	60.272	20	280	870	1149	AGGCACCATCGATTACACAA	59.002	20	ACTGCTTCATTCATGCCACA	60.272	20	279	870	1148
TR48108_c2_g1	GCCTAAGAATCGGAGGGACT	59.674	20	CAAATCAAAACAAGCATGTACCA	59.918	23	268	43	310	CGGAGGGACTAATGTTTTGG	59.424	20	CAAATCAAAACAAGCATGTACCA	59.918	23	258	53	310	GGGATTTGCCTAAGAATCGG	60.764	20	CAAATCAAAACAAGCATGTACCA	59.918	23	275	36	310
TR12035_c0_g2	GCCATTTCAGCCAATCAGAC	60.613	20	TGTTTCGAGAAATGTGGGAA	59.097	20	141	4	144	GCCATTTCAGCCAATCAGAC	60.613	20	CATGTTTCGAGAAATGTGGG	58.973	20	143	4	146	CAATCAGACGCCTGAGATCC	60.769	20	TGTTTCGAGAAATGTGGGAA	59.097	20	130	15	144
TR9818_c0_g1	GCCAGGTGCCAAGAAGTTTA	60.249	20	ATCTGTCAAAATGGCAGCCT	59.7	20	213	321	533	ACAACATGAATGGGTGCAAG	59.42	20	ATCTGTCAAAATGGCAGCCT	59.7	20	262	272	533	CAACATGAATGGGTGCAAGT	59.42	20	ATCTGTCAAAATGGCAGCCT	59.7	20	261	273	533
TR58384_c0_g1	GCATCGATTCAATAAAATGTGG	59.327	22	TTCAGACACGGGTCAACTCT	58.275	20	220	187	406	GCATCGATTCAATAAAATGTGG	59.327	22	CGGGTCAACTCTAGTTGCATT	59.252	21	212	187	398	CATCGATTCAATAAAATGTGGG	59.189	22	TTCAGACACGGGTCAACTCT	58.275	20	219	188	406
TR23886_c2_g1	AGAGGAGGAGAGGGAAGCAG	60.088	20	TGCATGTTCTCCTCGTGTTC	59.837	20	246	4539	4784	TTCTGCACAGAATGCAGGAC	59.992	20	CTGAGGTTTGACTTGCGGAT	60.255	20	241	4496	4736	AGGAGGAGAGGGAAGCAGAG	60.088	20	CTGAGGTTTGACTTGCGGAT	60.255	20	196	4541	4736
TR55119_c0_g1	CAGCCATAATTGGTGGTTCC	60.192	20	TTGAAGCAATAAATGCAAACAGA	59.782	23	226	751	976	CAGCCATAATTGGTGGTTCC	60.192	20	TGAAGCAATAAATGCAAACAGAA	59.782	23	225	751	975	CAGCCATAATTGGTGGTTCC	60.192	20	TGAAGCAATAAATGCAAACAGA	58.495	22	225	751	975
TR22530_c1_g1	GCAGCAAACAGTGAAGATCC	58.444	20	CCATGCACTTTTTGTGCTGT	59.764	20	233	917	1149	GAAGATCCTGATCAGACAGCG	59.965	21	TCCATGCACTTTTTGTGCTG	60.844	20	222	929	1150	GAAGATCCTGATCAGACAGCG	59.965	21	GCACTTTTTGTGCTGTCTTCC	59.912	21	217	929	1145
TR54389_c0_g1	CTGGTTTGCAATCTCAGCCT	60.397	20	TCGTGTTTTGTCATGGTTGG	60.404	20	241	49	289	CTGGTTTGCAATCTCAGCCT	60.397	20	CGTGTTTTGTCATGGTTGGA	60.404	20	240	49	288	TGGTTTGCAATCTCAGCCTT	60.776	20	TCGTGTTTTGTCATGGTTGG	60.404	20	240	50	289
TR54389_c0_g1	AACCAAACTCCGCAAACAAG	60.147	20	GAAGTGCATGCTGATCCAGA	59.95	20	220	845	1064	AACCAAACTCCGCAAACAAG	60.147	20	TCCAGATCTACCTTCGTGGC	60.218	20	206	845	1050	TAACCAAACTCCGCAAACAA	59.202	20	GAAGTGCATGCTGATCCAGA	59.95	20	221	844	1064
TR33406_c0_g1	TGTTTGCCCACGAAATAACA	59.969	20	ACTGCCGATGAAAACGAAAC	60.118	20	258	36	293	TGTTTGCCCACGAAATAACA	59.969	20	GCCGATGAAAACGAAACACT	60.118	20	255	36	290	TGCCCACGAAATAACAGTGA	60.111	20	ACTGCCGATGAAAACGAAAC	60.118	20	254	40	293
TR58230_c0_g1	CTTTGTCTTTCTTCCAACCCA	59.201	21	CAAACGAATGTTGCTAACCG	59.226	20	275	968	1242	TTTGTCTTTCTTCCAACCCA	58.173	20	CAAACGAATGTTGCTAACCG	59.226	20	274	969	1242	ACTTTGTCTTTCTTCCAACCCA	60.012	22	CAAACGAATGTTGCTAACCG	59.226	20	276	967	1242
TR45420_c0_g1	AACCCACAAAGGTGAGCATC	59.973	20	ATACCCTGCCATTTTCCGTT	60.562	20	213	2600	2812	GAACCCACAAAGGTGAGCAT	59.973	20	ATACCCTGCCATTTTCCGTT	60.562	20	214	2599	2812	AACCCACAAAGGTGAGCATC	59.973	20	GAAAAATTCCGTATCGTGCC	59.415	20	139	2600	2738
TR33474_c0_g1	TTTCACCATGAACAGTTGGG	59.389	20	TCCGTAGTCTGGTCTGGGTC	60.112	20	253	1530	1782	TTTCACCATGAACAGTTGGG	59.389	20	TTCCGTAGTCTGGTCTGGGT	59.574	20	254	1530	1783	TAGCACCAGAACTTGGCCTC	60.397	20	AGTCTGGTCTGGGTCTGGTC	59.117	20	279	1499	1777
TR55208_c0_g1	AGCAGGATAGCTGGAAGCTG	59.74	20	TGCAAAGAAAACTGGACGAA	59.439	20	222	783	1004	AGCAGGATAGCTGGAAGCTG	59.74	20	GGTGCAAAGAAAACTGGACG	60.668	20	224	783	1006	ATTTGCAGCAGGATAGCTGG	60.374	20	TGCAAAGAAAACTGGACGAA	59.439	20	228	777	1004
TR43713_c0_g1	TGCCATGAGCAAATGAAAAA	60.193	20	CCTCGGCCAATCTTCACTAA	60.206	20	212	135	346	TGCCATGAGCAAATGAAAAA	60.193	20	ACCTCGGCCAATCTTCACTA	59.694	20	213	135	347	TGCCATGAGCAAATGAAAAA	60.193	20	TACCTCGGCCAATCTTCACT	59.694	20	214	135	348
TR32741_c1_g1	GGCCTGCCATTGTAGGTTTA	59.96	20	GGGCCGTATTTCCAGTTTTT	60.184	20	172	343	514	TTAAACAGGCCTGCCATTGT	60.502	20	GGGCCGTATTTCCAGTTTTT	60.184	20	179	336	514	TTAAAGCCAGGCCTGAAAAG	59.469	20	GGGCCGTATTTCCAGTTTTT	60.184	20	155	360	514
TR54801_c0_g1	GTTCGAAGGGGGAACTCAAT	60.306	20	TCTGCTATGACCAGCCTGTG	60.008	20	275	305	579	GTTCGAAGGGGGAACTCAAT	60.306	20	TCGCTGTCATCCACTGTAGC	60.016	20	140	305	444	GTTCGAAGGGGGAACTCAAT	60.306	20	CAACATCATCGCTGTCATCC	60.08	20	148	305	452
TR41024_c0_g1	GAACGGGGTCAGTTTGAAGA	60.088	20	ATGGTTTGTGTACGGTTGGC	60.678	20	201	804	1004	ACTGAACGGGGTCAGTTTGA	60.545	20	ATGGTTTGTGTACGGTTGGC	60.678	20	204	801	1004	GAACGGGGTCAGTTTGAAGA	60.088	20	AGATGGTTTGTGTACGGTTGG	59.766	21	203	804	1006
TR29819_c1_g1	GGTTTGGAAACTTGTCTGCC	59.574	20	AAGCAGTCTCGGAACAGACC	59.455	20	250	573	822	TGTCTGCCAGTTTTAACCGA	59.317	20	AAGCAGTCTCGGAACAGACC	59.455	20	238	585	822	GGTTTGGAAACTTGTCTGCC	59.574	20	TGGCAAGCTGGAGTGTTAAG	59.072	20	228	573	800
TR33247_c0_g1	TCATCCCCACACAACTTGAA	59.935	20	TTCAAACCAGACAACTGTCCC	59.997	21	253	1431	1683	TCATCCCCACACAACTTGAA	59.935	20	CAAACCAGACAACTGTCCCTC	59.607	21	251	1431	1681	TCATCCCCACACAACTTGAA	59.935	20	TCAAACCAGACAACTGTCCCT	59.607	21	252	1431	1682
TR25451_c2_g1	CCACAACAGCAGTCACAAGG	60.348	20	CTGACCACTTCATTTCCGGT	59.966	20	193	1154	1346	CAACAGCAGTCACAAGGCTC	59.622	20	CTGACCACTTCATTTCCGGT	59.966	20	190	1157	1346	CTAGGAAACTCCGGTTCCGT	60.488	20	CTGACCACTTCATTTCCGGT	59.966	20	223	1124	1346
TR25451_c2_g1	CGGACGACGACGTTATTTTT	59.996	20	TCGACTTGGGTAGGAATGCT	59.694	20	211	3205	3415	CTTTCGGACGACGACGTTAT	60.132	20	TCGACTTGGGTAGGAATGCT	59.694	20	215	3201	3415	CGGACGACGACGTTATTTTT	59.996	20	GTCGACTTGGGTAGGAATGC	59.556	20	212	3205	3416
TR39485_c0_g1	TGGTTTTCAGGCTCAGCTTT	59.993	20	GCCCAATGACAAATGTTTCC	60.177	20	263	1	263	GGTTTTCAGGCTCAGCTTTG	59.993	20	GCCCAATGACAAATGTTTCC	60.177	20	262	2	263	TGGTTTTCAGGCTCAGCTTT	59.993	20	ATTCACGCCCAATGACAAAT	60.199	20	269	1	269
TR28472_c0_g1	TAACCTTGGGCACAGGTCAT	60.375	20	AAAGGGTGTCCCAATTGTCC	60.979	20	217	40	256	GCCTCCATGCTCAGCTTTAT	59.439	20	AAAGGGTGTCCCAATTGTCC	60.979	20	236	21	256	TAACCTTGGGCACAGGTCAT	60.375	20	TTGTCCGTCCATTTTGTCAT	58.824	20	203	40	242
TR9366_c3_g3	AGTATTGCTCCAGCTGCGTT	60.044	20	AGCCAGAGAGCATTTGGTTC	59.434	20	152	1216	1367	GTATTGCTCCAGCTGCGTTT	60.416	20	AGCCAGAGAGCATTTGGTTC	59.434	20	151	1217	1367	AGTCATGGTACCTGCCGAAC	59.997	20	AAGCCAGAGAGCATTTGGTT	58.936	20	238	1131	1368
TR23229_c0_g1	ATGGTGACCGGAATATGGAA	60.014	20	GTCCGTCTGGTGCCTACATT	59.997	20	209	792	1000	CCTGTTGGAATTGCTGGATT	59.933	20	TGTGTCTCAGGGTGCCATTA	60.112	20	224	665	888	GTCATGACCATTCCTCCACC	60.184	20	GTCCGTCTGGTGCCTACATT	59.997	20	253	748	1000
TR44813_c0_g1	TTACTTGGCGAACCACACAA	60.149	20	GCTGCTTCTGATAAAGGACTGG	60.393	22	265	1493	1757	CTTACTTGGCGAACCACACA	59.758	20	GCTGCTTCTGATAAAGGACTGG	60.393	22	266	1492	1757	TTACTTGGCGAACCACACAA	60.149	20	TCAGCTGCTTCTGATAAAGGA	57.864	21	268	1493	1760
TR46223_c1_g1	CATGGGATGACAGCAATGTT	59.374	20	TGGTCTCATTTAATTTCTCTGGG	59.489	23	102	36	137	CCGGCTGATCTGGATTTACA	60.992	20	TGGTCTCATTTAATTTCTCTGGG	59.489	23	133	5	137	GCAATGTTGCTTGAAGGGTT	60.118	20	CACAATTCACTAGGCTTAGCATGA	60.662	24	240	48	287
TR23896_c4_g1	ATGATAAGGGGAACCCTTGG	60.011	20	CTTTCCGGACAATCCTCGTA	60.066	20	279	32	310	ATGATAAGGGGAACCCTTGG	60.011	20	AGCGCTGTTTGCCTTGTATT	59.911	20	209	32	240	GATAAGGGGAACCCTTGGAG	59.761	20	CTTTCCGGACAATCCTCGTA	60.066	20	277	34	310
TR23896_c4_g1	GTCTGAACTGCTGATGACGG	59.42	20	GCGATAATGAAAATGTTGTTGC	59.503	22	179	813	991	TCTGAACTGCTGATGACGGT	59.42	20	GCGATAATGAAAATGTTGTTGC	59.503	22	178	814	991	GTCTGAACTGCTGATGACGG	59.42	20	TCATCTTAAGAAGCGTAAGCGA	59.298	22	197	813	1009
TR7251_c0_g2	TTTTTGCTGTTTTTGCTGTTG	59.037	21	TTGCGTCGTTTTCAAACAGT	59.366	20	242	2598	2839	TTGCTGTTTTTGCTGTTGATTT	59.801	22	TTGCGTCGTTTTCAAACAGT	59.366	20	239	2601	2839	TTTGCTGTTTTTGCTGTTGATT	59.801	22	TTGCGTCGTTTTCAAACAGT	59.366	20	240	2600	2839
TR41257_c0_g1	TTTCCTCATCCGACTCATCC	60.011	20	TCACCCAGGCAAGAGAGAGT	59.986	20	174	6054	6227	TTTCCTCATCCGACTCATCC	60.011	20	CCCTGCAGGAGAGTTCTCAG	60.127	20	146	6054	6199	TTTCCTCATCCGACTCATCC	60.011	20	GAGACAACAGCAGGACCCTC	59.841	20	199	6054	6252
TR26249_c0_g1	TGTTGGTTTTGGGATCCACT	60.21	20	ATCTAAGGCATGGATGTGCC	59.923	20	268	2455	2722	TTGGTTTTGGGATCCACTTT	59.264	20	ATCTAAGGCATGGATGTGCC	59.923	20	266	2457	2722	TGTTGGTTTTGGGATCCACT	60.21	20	TCCTCCATCTGTTTCTGCAA	59.369	20	188	2455	2642
TR40231_c0_g1	TCGGCAGAAGGTGTTAATCC	60.074	20	TCTGGAATGATTGCTCCCAT	60.426	20	215	574	788	TCGGCAGAAGGTGTTAATCC	60.074	20	ATCTGGAATGATTGCTCCCA	60.426	20	216	574	789	TCGGCAGAAGGTGTTAATCC	60.074	20	TGGAATGATTGCTCCCATCT	60.426	20	213	574	786
TR40231_c0_g1	TTTGCCAGAATTCTCTGCCT	59.955	20	ATCTGGAGCAATTTTCACCG	60.074	20	259	1025	1283	TTTGCCAGAATTCTCTGCCT	59.955	20	TCCATGTCTGCACCACTGTT	60.162	20	146	1025	1170	CTTGTCAGCATGTGGCTTGT	59.905	20	TCCATGTCTGCACCACTGTT	60.162	20	185	986	1170
TR25481_c2_g4	CCGGTCGCGTATAGGATTAT	58.946	20	TCAGCAACAAAACACTGCAT	57.896	20	280	232	511	TTGTTTGGTGGTAGATTGGTTTC	60.136	23	CTCCAGCAACATCAAACACG	60.301	20	233	426	658	TGTTTGGTGGTAGATTGGTTTC	58.858	22	CTCCAGCAACATCAAACACG	60.301	20	232	427	658
TR45075_c0_g1	GACGTTTCGTACGGCAATTT	60.003	20	AACATATGCGTGAGCGAGTG	59.895	20	225	658	882	GACGTTTCGTACGGCAATTT	60.003	20	ATATGCGTGAGCGAGTGCTA	59.62	20	222	658	879	GTCGCAAACAGCATTTCCTT	60.257	20	ATATGCGTGAGCGAGTGCTA	59.62	20	193	687	879
TR57727_c0_g2	GAAACCCTTATTTACAGGCGG	59.851	21	AAATGCTTCAGCGCATTTTC	60.351	20	264	702	965	GAAACCCTTATTTACAGGCGG	59.851	21	CAACACAAAATGCTTCAGCG	60.436	20	271	702	972	GAAACCCTTATTTACAGGCGG	59.851	21	AGGCAACACAAAATGCTTCA	59.322	20	274	702	975
TR15086_c0_g1	CTGACCAATGCAGATCCAGA	59.787	20	CATTTGTGCCACTTGTATGC	57.632	20	258	7	264	TCTGACCAATGCAGATCCAG	59.787	20	CATTTGTGCCACTTGTATGC	57.632	20	259	6	264	CTCTGACCAATGCAGATCCA	59.787	20	CATTTGTGCCACTTGTATGC	57.632	20	260	5	264
TR15086_c0_g1	TGTCATCCAAAACATCAGGAA	58.961	21	ACGAGGCATGCTGTCTCTCT	60.167	20	115	787	901	TGTCATCCAAAACATCAGGA	57.41	20	ACGAGGCATGCTGTCTCTCT	60.167	20	115	787	901	TGTCATCCAAAACATCAGGAAT	59.292	22	ACGAGGCATGCTGTCTCTCT	60.167	20	115	787	901
TR7639_c0_g1	TTAACTCGAACGAACCCCAC	59.971	20	CAGAAACGACAGCACCAAGA	60.025	20	147	444	590	CTTAACTCGAACGAACCCCA	60.103	20	CAGAAACGACAGCACCAAGA	60.025	20	148	443	590	GGTAACCGTTTTCCTCAGCA	60.11	20	CAGAAACGACAGCACCAAGA	60.025	20	258	333	590
TR24410_c0_g1	CATTTTGTGGGCTCATTCCT	59.933	20	TCCCAGTCTGCAACAGTCTC	58.968	20	216	104	319	CATTTTGTGGGCTCATTCCT	59.933	20	TCCCAGTCTGCAACAGTCTCT	60.041	21	216	104	319	GTTTCAACCGCTGTTCCACT	60.156	20	TCCCAGTCTGCAACAGTCTC	58.968	20	240	80	319
TR27622_c0_g1	GCTAATGGACAACAGCAGCA	60.019	20	AAAGCGGTTCTTCATCTCCA	59.813	20	229	601	829	TGCTAATGGACAACAGCAGC	60.019	20	AAAGCGGTTCTTCATCTCCA	59.813	20	230	600	829	GCTAATGGACAACAGCAGCA	60.019	20	TTTGGCATTGACATAAAGCG	59.702	20	243	601	843
TR12617_c0_g2	TAAATGCTGTTGATTGGCGA	60.215	20	GAAGTCTTTCTCCGGCCTTT	59.827	20	208	297	504	TAAATGCTGTTGATTGGCGA	60.215	20	AAGTCTTTCTCCGGCCTTTC	59.827	20	207	297	503	TAAATGCTGTTGATTGGCGA	60.215	20	ATTCGAGGTGAAACGCAAAG	60.249	20	255	297	551
TR18210_c0_g1	ACCGGCAAGCTTCAGTTATC	59.34	20	ACCGCGAGACGAATAATGAC	60.103	20	229	1696	1924	CACCGGCAAGCTTCAGTTAT	60.27	20	CGCGACACTAATGATGACCA	60.687	20	211	1695	1905	TTTTATGCAGGGATTTTGCG	60.931	20	ACCGCGAGACGAATAATGAC	60.103	20	167	1758	1924
TR17282_c9_g1	TCGGACGTTAATCGAGTTCC	60.074	20	GCATTGACAAAAGCACGAAA	59.856	20	215	921	1135	CGATTACTTGTTCCCATCCC	59.244	20	GCATTGACAAAAGCACGAAA	59.856	20	187	949	1135	CGGACGTTAATCGAGTTCCT	59.195	20	GCATTGACAAAAGCACGAAA	59.856	20	214	922	1135
TR29668_c0_g1	TGATTCAGATCACCCAGCAA	60.201	20	TCACTTGTTTATTCAACGTTTTGG	60.294	24	276	35	310	TTGATTCAGATCACCCAGCA	60.201	20	TCACTTGTTTATTCAACGTTTTGG	60.294	24	277	34	310	TGATTCAGATCACCCAGCAA	60.201	20	CACTTGTTTATTCAACGTTTTGG	58.645	23	275	35	309
TR29812_c0_g2	CAAAATGGGATTTGCAAAATATG	60.406	23	GCACCCCTTTCCCCTAAATA	60.143	20	265	239	503	CCTTTAGCAATGAAAGATGGC	58.844	21	ATCCTTCCATTCTGTTGGCT	58.595	20	256	186	441	TTTCTTAAGCAAAATGGGATTTG	59.525	23	GCACCCCTTTCCCCTAAATA	60.143	20	274	230	503
TR39094_c0_g1	TGACGACGCCCCAATATTAC	60.721	20	GCAGGAACATGCCTTCAGAC	60.812	20	248	1089	1336	TGACGACGCCCCAATATTAC	60.721	20	GCAGGAACATGCCTTCAGA	59.934	19	248	1089	1336	GACGACGCCCCAATATTACT	58.93	20	GCAGGAACATGCCTTCAGAC	60.812	20	247	1090	1336
TR10439_c0_g1	TGGGAAAGGTTTCTGACCTG	60.081	20	CAACGGAACCAACACAGATG	60.001	20	271	1654	1924	ACACTTGAAATGTTGCCGTG	59.615	20	CAACGGAACCAACACAGATG	60.001	20	190	1735	1924	AAATGTTGCCGTGGAGTTGT	60.419	20	CAACGGAACCAACACAGATG	60.001	20	183	1742	1924
TR27462_c0_g1	CTCTTGACTAATGGGGCCAA	60.066	20	TTTTTCGTTCATAAAATCGTTCTG	59.572	24	182	1861	2042	CTCTTGACTAATGGGGCCAA	60.066	20	TTTTCGTTCATAAAATCGTTCTG	58.366	23	181	1861	2041	CTCTTGACTAATGGGGCCAA	60.066	20	TTTTCGTTCATAAAATCGTTCTGT	59.131	24	181	1861	2041
TR10709_c2_g2	TGCAGTGATTTCTGTGCTCC	59.992	20	TGGCCATTGAGTACCAACAA	59.964	20	221	1687	1907	CCGTATTGCCCTCTGGATAA	59.916	20	TGGCCATTGAGTACCAACAA	59.964	20	182	1726	1907	GTGATTTCTGTGCTCCCGTT	60.119	20	TGGCCATTGAGTACCAACAA	59.964	20	217	1691	1907
TR6418_c0_g1	AGGACCTGACCTCCAGCATA	59.679	20	CAAAAGAAAAGATTTGATTGGTACA	58.706	25	252	870	1121	AGGACCTGACCTCCAGCATA	59.679	20	ACAAAAGAAAAGATTTGATTGGTACA	59.42	26	253	870	1122	AGGACCTGACCTCCAGCATA	59.679	20	AAAGAAAAGATTTGATTGGTACATGA	59.385	26	250	870	1119
TR25195_c0_g5	CAAGCCTTCCATTGGTCTGT	60.111	20	ATGTTTAAAAGGGGCAGCCT	59.966	20	277	82	358	CAAGCCTTCCATTGGTCTGT	60.111	20	GGCAGCCTTGAATCAAATGT	60.081	20	265	82	346	CAAGCCTTCCATTGGTCTGT	60.111	20	TGGTTGCAGACATTTCATGG	60.517	20	246	82	327
TR25195_c0_g5	AGGCTGCCCCTTTTAAACAT	59.966	20	TGCCATTTCAAACTGCAGAC	59.847	20	200	339	538	AGGCTGCCCCTTTTAAACAT	59.966	20	CCATTTCAAACTGCAGACCA	59.691	20	198	339	536	GGCTGCCCCTTTTAAACATT	60.312	20	TGCCATTTCAAACTGCAGAC	59.847	20	199	340	538
TR10655_c0_g1	TGGTGACCGAGCTTTGAAAT	60.636	20	TGAAATGAAAGTATTAGGTTGATTGG	59.708	26	277	4860	5136	CCGAGCTTTGAAATTAGGCTT	59.871	21	TGAAATGAAAGTATTAGGTTGATTGG	59.708	26	271	4866	5136	GTGGTGACCGAGCTTTGAA	59.822	19	TGAAATGAAAGTATTAGGTTGATTGG	59.708	26	278	4859	5136
TR40244_c1_g1	CGACATCCAAAGTCACATGG	59.96	20	TCAAAAACAATAGCACCCACA	59.073	21	147	905	1051	GGTGCTCTTTAACGGATGGA	60.074	20	TCAAAAACAATAGCACCCACA	59.073	21	234	818	1051	GATGGAAATCGGTCCAGAAA	59.871	20	TCAAAAACAATAGCACCCACA	59.073	21	220	832	1051
TR29321_c1_g4	GCAATTGTTTTCGAGGCATT	60.081	20	AATGTTCATGTTTGGGGCAT	60.059	20	166	126	291	TGGGTCTTTTCAGAGCTTGC	60.517	20	AATGTTCATGTTTGGGGCAT	60.059	20	259	33	291	TGGGTCTTTTCAGAGCTTGC	60.517	20	CATGCCACGGGAAAACTTAT	59.823	20	242	33	274
TR18079_c0_g1	ACATCGTATGTGGGCAGTGA	59.992	20	AGTTTGGAGGAAATGCCCTT	59.94	20	229	1568	1796	ACATCGTATGTGGGCAGTGA	59.992	20	GCCCCTTATTTTTATGCCGT	60.168	20	178	1568	1745	ACATCGTATGTGGGCAGTGA	59.992	20	TCTTGGCGGATATCTTTTGC	60.175	20	278	1568	1845
TR18079_c0_g1	ACATCGTATGTGGGCAGTGA	59.992	20	AGTTTGGAGGAAATGCCCTT	59.94	20	229	1568	1796	ACATCGTATGTGGGCAGTGA	59.992	20	TCTTGGCGGATATCTTTTGC	60.175	20	278	1568	1845	CATCGTATGTGGGCAGTGAG	60.136	20	AGTTTGGAGGAAATGCCCTT	59.94	20	228	1569	1796
TR24447_c0_g1	TCTGTGTCGTCTGCTGATCC	59.988	20	TGTCAGAGGCTCCATGTCAG	59.98	20	219	1065	1283	GCTATGATGGAGGAGGTGGA	60.034	20	TGTCAGAGGCTCCATGTCAG	59.98	20	105	1179	1283	TCTGTGTCGTCTGCTGATCC	59.988	20	GTGTCAGAGGCTCCATGTCA	59.827	20	220	1065	1284
TR10678_c1_g2	CATTTATTCCGAAAGAACATAATCG	60.101	25	GCCTGCAAGCAGTGTTGTTA	60.058	20	280	13	292	TTTATTCCGAAAGAACATAATCG	57.458	23	GCCTGCAAGCAGTGTTGTTA	60.058	20	278	15	292	TTCCGAAAGAACATAATCGTTAC	57.426	23	GCCTGCAAGCAGTGTTGTTA	60.058	20	274	19	292
TR24510_c0_g1	ATTGCTTCCGAGACACACTG	58.882	20	GACATCCATATTTCGATGCAA	58.444	21	274	1064	1337	ATTGCTTCCGAGACACACTG	58.882	20	AGACATCCATATTTCGATGCAA	59.438	22	275	1064	1338	CCTATTGCTTCCGAGACACA	58.874	20	GACATCCATATTTCGATGCAA	58.444	21	277	1061	1337
TR8069_c0_g1	TGAGCACCGAAATTATTCTGC	60.224	21	AAGAAACTATGGCGGTATCCAA	59.864	22	179	199	377	GCACCGAAATTATTCTGCAA	58.771	20	AAGAAACTATGGCGGTATCCAA	59.864	22	176	202	377	TGTTGGGTATAGTACCGTATCGC	60.16	23	CCCGAATCACATGGCTTATT	59.784	20	245	270	514
TR2962_c0_g1	AAAACAAAGATGGCGAATGC	60.081	20	TCACCAATCTACCACCAGCA	60.112	20	195	1625	1819	AAAACAAAGATGGCGAATGC	60.081	20	ACCAATCTACCACCAGCAGC	60.142	20	193	1625	1817	GTTGTGTCCACAGGCTCAGA	59.872	20	TCACCAATCTACCACCAGCA	60.112	20	245	1575	1819
TR2962_c0_g1	TGAAATCGGACATTGCCATA	59.891	20	TTATTTTTCGTGCTGGAGGG	60.067	20	197	2143	2339	TTGATCTGTTGTTGGCTTGC	59.847	20	TTATTTTTCGTGCTGGAGGG	60.067	20	266	2074	2339	GCTTGCCCACTCTCTGACAT	60.418	20	TTATTTTTCGTGCTGGAGGG	60.067	20	252	2088	2339
TR2962_c0_g1	CCCTCCAGCACGAAAAATAA	60.067	20	TGTCGTTCCATGTATTCTCAACA	60.414	23	221	2320	2540	CCCTCCAGCACGAAAAATAA	60.067	20	TGTTGTCGTTCCATGTATTCTCA	60.414	23	224	2320	2543	CCCTCCAGCACGAAAAATAA	60.067	20	TTGTCGTTCCATGTATTCTCAA	58.147	22	222	2320	2541
TR2962_c0_g1	TGAGAATACATGGAACGACAACA	60.414	23	CCCTATTTAAACGGTAACAAATCC	59.157	24	107	2521	2627	TGTTGAGAATACATGGAACGACA	60.414	23	CCCTATTTAAACGGTAACAAATCC	59.157	24	110	2518	2627	TGAGAATACATGGAACGACAACA	60.414	23	TTGACCCTATTTAAACGGTAACAAA	60.048	25	111	2521	2631
TR4733_c1_g2	GCCAAATTTCAGCACCTGAT	60.081	20	ACTGTTGATACTGGGGGCAC	59.851	20	192	291	482	GCCAAATTTCAGCACCTGAT	60.081	20	ACTGTTGATACTGGGGGCAC	59.851	20	262	291	552	GGTCAGCCATAATGCCAAAT	59.791	20	ACTGTTGATACTGGGGGCAC	59.851	20	205	278	482
TR27129_c1_g2	TACCAGCTGATGTTGCATCC	59.679	20	TGTCTTCCTCCACAACCTCC	60.088	20	189	29	217	TACCAGCTGATGTTGCATCC	59.679	20	TCCTGTTCCTCCCACTCAAC	60.088	20	253	29	281	TACCAGCTGATGTTGCATCC	59.679	20	TTCTTGTCTTCATCCCCACC	59.903	20	100	29	128
TR27129_c1_g2	CAAGGGAAAGCACATGAAAAA	60.096	21	CCAGCCCCCTTAAGGTCTAT	59.438	20	128	1251	1378	CAAGGGAAAGCACATGAAAA	58.745	20	CCAGCCCCCTTAAGGTCTAT	59.438	20	128	1251	1378	ACAAGGGAAAGCACATGAAAA	59.601	21	CCAGCCCCCTTAAGGTCTAT	59.438	20	129	1250	1378
TR22836_c1_g1	CGCCAGACAGTGTAGATGGA	59.855	20	GTCTGATCAGGATCCGCACT	60.231	20	205	3619	3823	TCGCCAGACAGTGTAGATGG	59.855	20	GTCTGATCAGGATCCGCACT	60.231	20	206	3618	3823	CGCCAGACAGTGTAGATGGA	59.855	20	GGTCTCCCACGCAATAAATG	60.331	20	185	3619	3803
TR28885_c0_g1	TCAAGCAATCAACGCATTTT	59.305	20	ATATCACCGGTGGAAGCAAA	60.331	20	217	42	258	CAAATCAAGCAATCAACGCA	60.786	20	ATATCACCGGTGGAAGCAAA	60.331	20	221	38	258	AACAAATCAAGCAATCAACGC	60.131	21	ATATCACCGGTGGAAGCAAA	60.331	20	223	36	258
TR58379_c0_g1	TTGGCCAAAATGGACCTATC	59.762	20	AGGGCTCAAAACTTCTGCAA	59.993	20	239	200	438	TTGGCCAAAATGGACCTATC	59.762	20	TAAAGGCAAAGGGCTCAAAA	59.826	20	248	200	447	TTGGCCAAAATGGACCTATC	59.762	20	CATAAAGGCAAAGGGCTCAA	60.202	20	250	200	449
TR48100_c4_g4	GGACTGGAGCTGCTCTTTGA	60.678	20	TCAGACGTTACTGCCAAGGA	59.44	20	261	125	385	GGACTGGAGCTGCTCTTTGA	60.678	20	AGATGCTGAGGTGCCATCAT	60.655	20	168	125	292	GGACTGGAGCTGCTCTTTGA	60.678	20	AACAGATGCTGAGGTGCCAT	60.688	20	171	125	295
TR24952_c0_g1	CCGTTGGTGAGCTGATGATA	59.673	20	GACCAGCATACGACTGGCTT	60.285	20	251	317	567	ACCGTTGGTGAGCTGATGAT	60.542	20	GACCAGCATACGACTGGCTT	60.285	20	252	316	567	GCAGTATCAAACCGTTGGTG	59.05	20	GACCAGCATACGACTGGCTT	60.285	20	262	306	567
TR20201_c0_g3	CAACCACCCACCCATGAC	60.664	18	CATGTGGGATTGTCAAGTGAA	59.405	21	232	0	231	CAACCACCCACCCATGAC	60.664	18	GGGATTGTCAAGTGAAACCA	58.387	20	227	0	226	AACCACCCACCCATGACC	61.515	18	TTTTGACATGTGGGATTGTCA	59.808	21	237	1	237
TR38538_c1_g1	ACCCTGATTGGCTCAGACAC	60.12	20	CAGATGCTGAGAAGTTTTGCC	60.008	21	257	726	982	ACCCTGATTGGCTCAGACAC	60.12	20	GCAGATGCTGAGAAGTTTTGC	60.154	21	258	726	983	CAAGTCGGGTGACAGCAATA	59.716	20	CAGATGCTGAGAAGTTTTGCC	60.008	21	155	828	982
TR498_c0_g1	CTTTTCTTTCGCCGTTGCTA	60.5	20	TCCTTGCCTGATTTAATGCC	60.038	20	204	638	841	CTTTTCTTTCGCCGTTGCTA	60.5	20	CAATCATCGTGAAACAAGCG	60.257	20	168	638	805	CTTTTCTTTCGCCGTTGCTA	60.5	20	TATTGCCGACAATCATCGTG	60.488	20	177	638	814
TR36976_c0_g1	CTTTCTTGAAAACGGCACAA	58.939	20	CAAAAACAGCAATTTCAGCAA	58.992	21	211	209	419	ACTTTCTTGAAAACGGCACAA	59.777	21	CAAAAACAGCAATTTCAGCAA	58.992	21	212	208	419	AACTTTCTTGAAAACGGCACA	59.777	21	CAAAAACAGCAATTTCAGCAA	58.992	21	213	207	419
TR48103_c2_g1	TATTGCAGGCCACACAAAAA	60.111	20	TCTCCTATTGCCCATCCATC	59.854	20	232	154	385	TATTGCAGGCCACACAAAAA	60.111	20	CTATTGCCCATCCATCCAAC	60.155	20	228	154	381	GGGGGAATACTGAATGGCTT	60.152	20	CTATTGCCCATCCATCCAAC	60.155	20	277	105	381
TR23308_c0_g1	ACCTGTAGGTACGACTCGGG	59.087	20	CCATCTGGGTTTTCCATCAT	59.605	20	218	1525	1742	CCTGTAGGTACGACTCGGGTT	60.421	21	CCATCTGGGTTTTCCATCAT	59.605	20	217	1526	1742	ACCTGTAGGTACGACTCGGG	59.087	20	ACCCATCTGGGTTTTCCATC	60.95	20	220	1525	1744
TR29791_c0_g4	TCGGCATTAACCTTTGAACA	59.157	20	GCTCTCGGACATGGAGCTAA	60.504	20	100	1328	1427	CCAGTGCAAAGACGAAAAGA	59.047	20	GCTCTCGGACATGGAGCTAA	60.504	20	159	1269	1427	TCCAGTGCAAAGACGAAAAG	59.047	20	GCTCTCGGACATGGAGCTAA	60.504	20	160	1268	1427
TR30126_c3_g6	CCCTTAGAAGTGGAGAACCCTT	59.996	22	TGGGTTTATTTCCAAAACCAAG	60.082	22	258	941	1198	CCCTTAGAAGTGGAGAACCCTT	59.996	22	TGGGTTTATTTCCAAAACCAAG	60.082	22	275	924	1198	TTTGCCAAAAACTAACCTGTTT	57.925	22	GATACTGCGGCATGGTTTTT	59.967	20	240	1099	1338
TR6555_c1_g1	TGTTGTGCTTGTGGTCATGG	61.633	20	CCACAACAACTCCTCAACCA	59.565	20	137	1139	1275	TGTTGTGCTTGTGGTCATGG	61.633	20	CCACAACAACTCCTCAACCA	59.565	20	170	1139	1308	AACAGGTTCCCTGTCTGTTGTT	59.938	22	CCACAACAACTCCTCAACCA	59.565	20	185	1091	1275
TR22257_c0_g1	CGAAAGACGTAGGTCAGTCACA	60.348	22	AAGTGGGCTTTCCTTGAGAA	58.909	20	211	412	622	CGAAAGACGTAGGTCAGTCACA	60.348	22	AAGTGGGCTTTCCTTGAGAAC	59.743	21	211	412	622	TTGCAAAATTGTGTGATTACGA	59.121	22	AAGTGGGCTTTCCTTGAGAA	58.909	20	230	393	622
TR18916_c0_g1	GGAGAGCGTGTTTGGAAAAG	59.853	20	ATAGCATGGTATCTTGCGGG	59.945	20	277	81	357	AGGAGAGCGTGTTTGGAAAA	59.853	20	ATAGCATGGTATCTTGCGGG	59.945	20	278	80	357	GCCAAGTTATGAGGAGAGCG	59.978	20	GCGGGTTTTTACCAGGTTTT	60.217	20	274	69	342
TR48660_c7_g1	CATTAACCTTGCCCTGCAAC	60.502	20	TTGATTTGCCCAAAATGTGA	59.907	20	209	1402	1610	CATTAACCTTGCCCTGCAAC	60.502	20	TTTGCCCAAAATGTGACAAG	59.561	20	205	1402	1606	CATTAACCTTGCCCTGCAAC	60.502	20	TGCCCAAAATGTGACAAGTG	60.552	20	203	1402	1604
TR52428_c0_g1	GAGGATGACGATGCTGATGA	59.75	20	TGATCGAACAACCTCTGTGC	59.837	20	179	3	181	GAGGATGACGATGCTGATGA	59.75	20	CCCAGCGAGCTTACTGAACT	59.639	20	147	3	149	GAGGATGACGATGCTGATGA	59.75	20	TCCCAGCGAGCTTACTGAAC	60.538	20	148	3	150
TR39797_c1_g1	GCTGAGCAAGGAAACCAGTC	59.997	20	TTTTCATTTTCCGGTCAAAAA	59.437	21	221	38	258	AAAGCTGAGCAAGGAAACCA	59.993	20	TTTTCATTTTCCGGTCAAAAA	59.437	21	224	35	258	CAAGCATCTGATTGGCTGAA	59.948	20	TTTTCATTTTCCGGTCAAAAA	59.437	21	193	66	258
TR39797_c1_g1	GCTGAGCAAGGAAACCAGTC	59.997	20	TTTTCATTTTCCGGTCAAAAA	59.437	21	221	817	1037	AAAGCTGAGCAAGGAAACCA	59.993	20	TTTTCATTTTCCGGTCAAAAA	59.437	21	224	814	1037	CAAGCATCTGATTGGCTGAA	59.948	20	TTTTCATTTTCCGGTCAAAAA	59.437	21	193	845	1037
TR3845_c1_g1	CATGTGATGGGTATTGTGGC	59.654	20	GATAGCACAAACAGCGTGGA	59.871	20	226	2057	2282	CATGTGATGGGTATTGTGGC	59.654	20	CGTGGACAGCATGGATACAG	60.136	20	212	2057	2268	CATGTGATGGGTATTGTGGC	59.654	20	GCATGGATACAGAAATGGGG	60.155	20	204	2057	2260
TR23314_c2_g2	ATGGCTGGTATGGGCTACAG	59.978	20	TTCGCTGGATTTACTGGTCC	60.074	20	263	1669	1931	GGCGCTTGACACAACTACAA	59.911	20	GAGGGCTTCGCTGAAGTATG	59.978	20	244	1815	2058	AAATCCAACTCACGGTCAGC	60.119	20	TTCGCTGAAGTATGTGCCAG	60.011	20	259	1794	2052
TR39808_c0_g1	TCAAAATGTTGCAGACTGGG	59.691	20	GTGACAGTGGAATGTGCAGG	60.162	20	251	699	949	CAAAATGTTGCAGACTGGGA	59.691	20	GTGACAGTGGAATGTGCAGG	60.162	20	250	700	949	TCAAAATGTTGCAGACTGGG	59.691	20	GGTGACAGTGGAATGTGCAG	60.162	20	252	699	950
TR39808_c0_g1	TGCACATTCCACTGTCACCT	60.162	20	TGATCGGCGTGTCAATTAAA	60.073	20	241	932	1172	CTGCACATTCCACTGTCACC	60.162	20	TGATCGGCGTGTCAATTAAA	60.073	20	242	931	1172	TTCCTGCACATTCCACTGTC	59.682	20	TGATCGGCGTGTCAATTAAA	60.073	20	245	928	1172
TR57331_c1_g1	CCACATTTCCATTTCATTGC	58.82	20	AGCAAATGTGGTCACCATGA	59.967	20	154	905	1058	TTTCCATTTCATTGCAAAACA	59.039	21	AGCAAATGTGGTCACCATGA	59.967	20	149	910	1058	TGATGGTGATGATGATGATGG	60.153	21	TGGTGATGAAAATGTGGTTGA	59.808	21	275	990	1264
TR10533_c1_g1	TTTCAGCACAGCAACAGTCC	60.032	20	AGGACACAAATGAACTGGCA	59.139	20	203	106	308	CACAGCAACAGTCCCTCAAA	59.873	20	AGGACACAAATGAACTGGCA	59.139	20	197	112	308	AGCAACAGTCCCTCAAATGC	60.263	20	AGGACACAAATGAACTGGCA	59.139	20	194	115	308
TR6046_c0_g1	TTCGTCCCCGAACTACACAT	60.375	20	AAAACAAATGGCTGTGGAGC	60.118	20	249	1	249	TTCGTCCCCGAACTACACAT	60.375	20	AAATGGCTGTGGAGCAAAAG	60.249	20	244	1	244	TTCGTCCCCGAACTACACAT	60.375	20	GCTGTGGAGCAAAAGCAAAT	60.395	20	239	1	239
TR18086_c0_g1	AAAAATGGTGCTGGGTGAAG	59.971	20	CCTGATAAGACGGCATGGAT	59.917	20	221	840	1060	AAAAATGGTGCTGGGTGAAG	59.971	20	ATCCTGATAAGACGGCATGG	59.917	20	223	840	1062	TTTCAAAAATGGTGCTGGGT	60.344	20	CCTGATAAGACGGCATGGAT	59.917	20	225	836	1060
TR35315_c0_g1	TTTTACGAATGTTGAATTCCATT	57.642	23	CTGCCTTGAAAATCATCAAAA	57.887	21	279	6535	6813	TTTTACGAATGTTGAATTCCATT	57.642	23	TGGCAAGATAATGGTTAGGAAAA	59.858	23	208	6535	6742	TTTTACGAATGTTGAATTCCATT	57.642	23	ACTGCCTTGAAAATCATCAAAA	58.742	22	280	6535	6814
TR58688_c0_g1	CGTTCTGCATTTGACATTCG	60.257	20	TGGCTGCAAACAAAAGAAAA	59.462	20	270	153	422	ATTCGCGTCGTTGTCTTCAT	60.667	20	TGGCTGCAAACAAAAGAAAA	59.462	20	255	168	422	GTTCTGCATTTGACATTCGC	59.281	20	TGGCTGCAAACAAAAGAAAA	59.462	20	269	154	422
TR2993_c0_g1	TTCTGACGGCTGACATGAAC	59.837	20	ATTCGAAGCAATGCCCATAC	59.929	20	200	140	339	TTCTGACGGCTGACATGAAC	59.837	20	AGAAGATCAATGCCCCACAG	60.073	20	274	140	413	TTCTGACGGCTGACATGAAC	59.837	20	TGCCAATGTTTGAAGTGGAA	60.088	20	246	140	385
TR23491_c1_g1	TTCCGGAACAAATTCAGTCA	59.097	20	TCCATCAGTAAGCAAGTCGC	59.028	20	210	1026	1235	TTCCGGAACAAATTCAGTCA	59.097	20	CAGTAAGCAAGTCGCGCAT	60.173	19	205	1026	1230	TTCCGGAACAAATTCAGTCA	59.097	20	CGCATGCGCTAAAGTCTGT	60.173	19	191	1026	1216
TR7669_c0_g1	CAGGCAACACATGAACATCA	59.085	20	TGCCACTCTTCTAGTCAGAATCTC	59.193	24	122	915	1036	ACAGGCAACACATGAACATCA	60.024	21	TGCCACTCTTCTAGTCAGAATCTC	59.193	24	123	914	1036	TCGTAAACAGGCAACACATGA	60.165	21	TGCCACTCTTCTAGTCAGAATCTC	59.193	24	129	908	1036
TR58331_c0_g1	CAAAGCCTAGATGAAGCGGA	60.481	20	AAATGCAAAATCCTTTCCCC	60.13	20	186	2167	2352	ACCAAAGCCTAGATGAAGCG	59.476	20	AAATGCAAAATCCTTTCCCC	60.13	20	188	2165	2352	CAAAGCCTAGATGAAGCGGA	60.481	20	ATGCAAAATCCTTTCCCCAC	61.053	20	184	2167	2350
TR21345_c0_g1	GGCACAGAATGCAAGAGAAA	59.002	20	TGGATGGAAGTGATGGAGTG	59.473	20	279	433	711	AGGCACAGAATGCAAGAGAAA	60.008	21	TGGATGGAAGTGATGGAGTG	59.473	20	280	432	711	GGCACAGAATGCAAGAGAAAA	60.38	21	TGGATGGAAGTGATGGAGTG	59.473	20	279	433	711
TR48089_c0_g1	GGCAACACTGAAGCTGACAA	60.032	20	AGCCATGTGGAAATCTTTGG	59.933	20	273	1653	1925	AGGGTCTGCTGACAACTGGT	59.756	20	AGCCATGTGGAAATCTTTGG	59.933	20	152	1774	1925	AAGCAGAGCCAGCTGAAATC	59.723	20	AGCCATGTGGAAATCTTTGG	59.933	20	239	1687	1925
TR21246_c0_g2	TCAATGCATTTTGCAGGTGT	60.119	20	CCCATGGGTGGATATTCTTG	60.006	20	121	511	631	CACGCATTCCGACTTGATAA	59.688	20	CCCATGGGTGGATATTCTTG	60.006	20	208	424	631	TCAATGCATTTTGCAGGTGT	60.119	20	AACAAGCAGATGTTCCCTCG	60.255	20	210	511	720
TR48096_c0_g3	CGTTTGTTTCTTTTTCAGCCA	60.263	21	GATGGTAAAAAGTACGTCGTTGA	58.249	23	148	1565	1712	CGTTTGTTTCTTTTTCAGCCA	60.263	21	AGATGGTAAAAAGTACGTCGTTGA	59.162	24	149	1565	1713	CGTTTGTTTCTTTTTCAGCCA	60.263	21	TTTTTGAAGTGAACCATCATGT	57.125	22	179	1565	1743
TR3252_c1_g1	CCCAGTGATTACAGCCCAAT	59.813	20	CAGATAAGGGGCAGACTCCA	60.21	20	209	92	300	CCCAGTGATTACAGCCCAAT	59.813	20	AAAGCGCAGTAGTCCAGCTC	59.786	20	190	92	281	ATTACAGCCCAATCCCACAA	60.192	20	CAGATAAGGGGCAGACTCCA	60.21	20	202	99	300
TR53688_c7_g2	AGAAGACCCCAAAATTTGCC	60.299	20	CGAATCACATATTTTTGTTCGAT	58.079	23	255	884	1138	CAAAATTTGCCGGAAATCAC	60.302	20	CGAATCACATATTTTTGTTCGAT	58.079	23	246	893	1138	AGAAGACCCCAAAATTTGCC	60.299	20	TTTTTGTTCGATTTTGAGTGTTT	57.912	23	244	884	1127
TR39664_c0_g1	ATCGTTTTATTTCGCTGGCA	60.588	20	TTGACAATGGGTCCATCAAA	59.75	20	155	499	653	TTTTATTTCGCTGGCACAAA	59.328	20	TTGACAATGGGTCCATCAAA	59.75	20	151	503	653	CACAAAATTTCGAGCAATCG	59.301	20	TTGACAATGGGTCCATCAAA	59.75	20	137	517	653
TR39664_c0_g1	ACTGACTCACCGTCCAAAAA	58.187	20	TCCAAAACATGCTGATGTCC	59.502	20	270	686	955	ACTGACTCACCGTCCAAAAA	58.187	20	CAAAACATGCTGATGTCCGA	60.665	20	268	686	953	ACTGACTCACCGTCCAAAAA	58.187	20	AAAACATGCTGATGTCCGAA	59.127	20	267	686	952
TR9002_c0_g1	TTCCACCATATCCACCACCT	60.05	20	CGCTGTAGTCGATCTCTCCC	59.973	20	261	1245	1505	TTCCACCATATCCACCACCT	60.05	20	GTCGATCTCTCCCTGAGCAC	59.952	20	254	1245	1498	GCCACCATATATGTACCGGG	59.923	20	GTCGATCTCTCCCTGAGCAC	59.952	20	277	1222	1498
TR48719_c1_g1	GCAACTTGCCATCTAACCAAA	60.124	21	GAAAGCTCTCGAGGCACAAC	60.142	20	216	731	946	GCAACTTGCCATCTAACCAAA	60.124	21	GGCACAACAGAAGGAGGAAG	59.844	20	204	731	934	GCAACTTGCCATCTAACCAAA	60.124	21	AGGCACAACAGAAGGAGGAA	59.844	20	205	731	935
TR58971_c0_g1	GCCAACAGAAGAGGCTCAAC	59.997	20	CGCAGTTTGATCTGCTTTGA	60.134	20	191	519	709	AGGCTCAACAGTGGCTGAGT	60.057	20	CGCAGTTTGATCTGCTTTGA	60.134	20	180	530	709	GCCAACAGAAGAGGCTCAAC	59.997	20	TTGCTGATACTGAGCAAGCG	60.302	20	231	519	749
TR58971_c0_g1	GCCAACAGAAGAGGCTCAAC	59.997	20	CGCAGTTTGATCTGCTTTGA	60.134	20	191	1307	1497	AGGCTCAACAGTGGCTGAGT	60.057	20	CGCAGTTTGATCTGCTTTGA	60.134	20	180	1318	1497	GCCAACAGAAGAGGCTCAAC	59.997	20	TTGCTGATACTGAGCAAGCG	60.302	20	231	1307	1537
TR58245_c0_g1	TGTCGCTAGTACAGCTCGGA	59.764	20	CGAATGAACTGATGGTGGTG	59.96	20	211	812	1022	TGTCGCTAGTACAGCTCGGA	59.764	20	GTCTGCTGCGAATGAACTGA	60.144	20	219	812	1030	TGTCGCTAGTACAGCTCGGA	59.764	20	CGATTCTTGAATGGTGCTGA	59.799	20	253	812	1064
TR1534_c0_g2	GAATAGCACACCGTTCCGTT	60	20	CCGTTTACGTCGGACTGTTT	60.03	20	170	670	839	CGTTCCGTTACATGTTGTGC	60.035	20	CCGTTTACGTCGGACTGTTT	60.03	20	159	681	839	CCGTTCCGTTACATGTTGTG	59.881	20	CCGTTTACGTCGGACTGTTT	60.03	20	160	680	839
TR45079_c0_g1	GCTACTGAGCTACCATCCGC	60.007	20	GAAGGTCCAAATTTCGGAATAA	59.335	22	183	960	1142	GAGCTACCATCCGCAACATT	60.103	20	GAAGGTCCAAATTTCGGAATAA	59.335	22	177	966	1142	AAGCTGTGTACCAAAGGCGT	59.803	20	GAAGGTCCAAATTTCGGAATAA	59.335	22	258	885	1142
TR55703_c0_g1	TCAACTGGCCAAAATCACAA	60.088	20	CTTTAAAAATGCGTACCGGG	59.489	20	265	811	1075	TCAACTGGCCAAAATCACAA	60.088	20	TTCAGACCAAGAAGCAACCA	59.415	20	223	811	1033	GGTCAACTGGCCAAAATCAC	60.362	20	CTTTAAAAATGCGTACCGGG	59.489	20	267	809	1075
TR27151_c0_g1	AGCTCGACAGTTGATGGCTT	60.02	20	TGGTGAATCAGACAGGGGAC	60.934	20	212	360	571	AAGCTCGACAGTTGATGGCT	60.02	20	TGGTGAATCAGACAGGGGAC	60.934	20	213	359	571	AGCTCGACAGTTGATGGCTT	60.02	20	TGGTGAATCAGACAGGGGA	60.029	19	212	360	571
TR27151_c0_g1	CATGTTGCCAGGAGCAGATA	59.823	20	GGGAGAAGGGAGGTGTAAGG	59.928	20	210	679	888	CATGTTGCCAGGAGCAGATA	59.823	20	GGGGAGAAGGGAGGTGTAAG	59.928	20	211	679	889	CATGTTGCCAGGAGCAGATA	59.823	20	GGGAGAAGGGAGGTGTAAGG	59.928	20	258	679	936
TR3832_c0_g1	TGAATCTGTAACAAACCTGGGA	59.471	22	AGTTTGCTCTGCCAATTGCT	60.022	20	174	3	176	TGAATCTGTAACAAACCTGGGA	59.471	22	TACGATTGTGGCAGTTCGAC	59.722	20	230	3	232	TGAATCTGTAACAAACCTGGGA	59.471	22	GTTTGCTCTGCCAATTGCTT	60.395	20	173	3	175
TR3832_c0_g1	TTTGCAGACGTTCACTCGAC	60.032	20	TGCTTGAGCAACCATTATCG	59.833	20	255	477	731	TTTGCAGACGTTCACTCGAC	60.032	20	TTCTTCAACCGCTCTGGAAT	59.813	20	191	477	667	TTTCTACTTGCCCCCATTTG	59.931	20	TGCTTGAGCAACCATTATCG	59.833	20	235	497	731
TR23854_c0_g1	GCAGCCGGAAAATATCTCAC	59.674	20	AAACAGGACATGCCATCCTC	59.934	20	251	587	837	GCAGCCGGAAAATATCTCAC	59.674	20	GCCCAAAAGAAAACAGGACA	60.088	20	261	587	847	GCAGCCGGAAAATATCTCAC	59.674	20	GAAAACAGGACATGCCATCC	60.326	20	253	587	839
TR23854_c0_g1	GGCGTGTTTACATTGCCTTT	60.003	20	AAGCGAGGAAAATGTTGCAT	59.713	20	236	976	1211	GGAATGCACAGGTGGACTTT	59.973	20	AAGCGAGGAAAATGTTGCAT	59.713	20	130	1082	1211	GGAATGCACAGGTGGACTTT	59.973	20	AGGCGCCAAAATATCGTAAA	59.586	20	212	1082	1293
TR18229_c0_g1	CACGCTTGTCCGTCTTCATA	59.864	20	GCAGTGATGCTGAAGCAGAG	59.887	20	205	377	581	CACGCTTGTCCGTCTTCATA	59.864	20	AAGTGGAGCTGATGTGGGAC	60.12	20	264	377	640	CACGCTTGTCCGTCTTCATA	59.864	20	TGAAAGTGGAGCTGATGTGG	59.831	20	267	377	643
TR8213_c5_g3	ACTTGTGTGATGGTGTAATGGA	57.854	22	TTCAGGGCTGAAGGTTATGG	60.066	20	186	67	252	ACTTGTGTGATGGTGTAATGGA	57.854	22	TCAGTTCAGGGCTGAAGGTT	59.844	20	190	67	256	ACTTGTGTGATGGTGTAATGGA	57.854	22	GACTGAACGCTCCATCCTGT	60.269	20	107	67	173
TR12034_c0_g1	GGTGCTTTATCCCGAGACAC	59.556	20	CAACCGTTGTTTTTCCCACT	59.869	20	218	1060	1277	GGTGCTTTATCCCGAGACAC	59.556	20	CCGTTGTTTTTCCCACTTTG	60.37	20	215	1060	1274	GAGGCCCTTACGTTATTTTGC	59.983	21	CAACCGTTGTTTTTCCCACT	59.869	20	184	1094	1277
TR26248_c2_g1	TAAATGTGAGGTCCGGAAGG	59.926	20	AAACGTTCTCAACATTGGTGG	59.883	21	232	699	930	AACGGTAAATGTGAGGTCCG	59.853	20	AAACGTTCTCAACATTGGTGG	59.883	21	237	694	930	ATCAGAGGGCATGCATTTTT	59.533	20	GCATCGAAAGATGCGTTAAA	58.914	20	251	750	1000
TR10384_c2_g4	AAGGCGAGTAAAAGCACTGG	59.517	20	AAATTGACTGGGAAAATGCG	59.938	20	258	597	854	AGGCGAGTAAAAGCACTGGT	59.008	20	AAATTGACTGGGAAAATGCG	59.938	20	257	598	854	GTGGCAAGGCATTGACAGAT	61.078	20	AAATTGACTGGGAAAATGCG	59.938	20	218	637	854
TR51722_c3_g2	CCCAAAATTACCTTGCAGATG	59.46	21	AGCATTCCAGTCTGGGTGTC	60.12	20	137	266	402	AAACCCAAAATTACCTTGCAGA	59.878	22	AGCATTCCAGTCTGGGTGTC	60.12	20	140	263	402	ACCCAAAATTACCTTGCAGATG	60.237	22	AGCATTCCAGTCTGGGTGTC	60.12	20	138	265	402
TR50008_c0_g4	TGAACCACAAGACATCTCGC	59.837	20	TATTCTGGGAACTGGGCAAC	59.933	20	243	1426	1668	TGAACCACAAGACATCTCGC	59.837	20	GTATTCTGGGAACTGGGCAA	59.933	20	244	1426	1669	TGAACCACAAGACATCTCGC	59.837	20	GGGAACTGGGCAACATACAC	60.24	20	237	1426	1662
TR4921_c0_g1	TGTTCCCATGGGCTCTAATC	59.894	20	CGAAAAACCTGGCTTGGTC	60.621	19	213	2370	2582	TGTTCCCATGGGCTCTAATC	59.894	20	AAAACCTGGCTTGGTCTTTC	58.293	20	210	2370	2579	TGTTCCCATGGGCTCTAATC	59.894	20	AAACCTGGCTTGGTCTTTCTT	59.268	21	209	2370	2578
TR27079_c0_g1	GAGATTCTGGCTGCTTGAGG	60.096	20	GACTCGGGGAAACAGCATAA	60.074	20	178	632	809	GAGATTCTGGCTGCTTGAGG	60.096	20	CACCGACAACAACCCTACCT	59.884	20	111	632	742	GAGATTCTGGCTGCTTGAGG	60.096	20	CGCCAGTATCGTCACATCAC	60.144	20	228	632	859
TR1104_c0_g1	AAACATGGATGGCTCCAAAG	59.933	20	GATGCAACATTTGCCAAAAA	59.543	20	226	296	521	TTTTGCTTGCCATGCATTAG	59.842	20	GTTTGAGTGTCCCCGATGTC	60.372	20	239	372	610	GCTTGCCATGCATTAGATCA	59.799	20	GTTTGAGTGTCCCCGATGTC	60.372	20	235	376	610
TR25812_c1_g1	TTCGGCACTGTTCAAACTGA	60.427	20	TTGCAATTGTTTAAATTCCTGG	59.022	22	258	2524	2781	TAAAACTGTGCACTTCGGCA	60.436	20	TTGCAATTGTTTAAATTCCTGG	59.022	22	271	2511	2781	CGGCACTGTTCAAACTGAAG	59.485	20	TTGCAATTGTTTAAATTCCTGG	59.022	22	256	2526	2781
TR49229_c0_g1	AGCCCTGCTAATGGGTTACA	59.592	20	CCGATTCTGCAACATCTCTTT	59.326	21	230	16	245	CAGCCCTGCTAATGGGTTAC	59.592	20	CCGATTCTGCAACATCTCTTT	59.326	21	231	15	245	AGCCCTGCTAATGGGTTACA	59.592	20	GCAACATCTCTTTCCAATGC	58.299	20	222	16	237
TR49229_c0_g1	CGGTGAATCCATCGTGATTA	59.35	20	TTCAGGCATGTTTGCATGTT	60.119	20	197	529	725	CGGTGAATCCATCGTGATTA	59.35	20	TTAAAGAATCCGGTTGCTCG	60.202	20	264	529	792	CGGTGAATCCATCGTGATTA	59.35	20	CTTCAGGCATGTTTGCATGT	59.722	20	198	529	726
TR26983_c0_g2	CTTCATGGGAACCGAAAATG	60.301	20	ATAACCCATGGAGGAAAGGG	60.011	20	197	748	944	CGACACCTAACCCAATGTGA	59.415	20	ATAACCCATGGAGGAAAGGG	60.011	20	233	712	944	TTTATCCTTCATGGGAACCG	59.756	20	CAGATGGCTTGAATGTGCTG	60.413	20	263	742	1004
TR23377_c0_g4	CACCAACAGCCAAGGAAACT	60.149	20	TTGAGCCAGTGACATTGCAG	61.023	20	226	85	310	CACCAACAGCCAAGGAAACT	60.149	20	TGAGCCAGTGACATTGCAG	59.531	19	225	85	309	CACCAACAGCCAAGGAAACT	60.149	20	AATGGTTGAGCCAGTGACATT	59.468	21	231	85	315
TR17463_c0_g2	CAAGTCAGGAACAGCTGCAA	60.175	20	ACTGGGCTTGACTAGAAGCG	59.639	20	216	563	778	TGCAGCAACAGCAATTTCAT	60.41	20	ACTGGGCTTGACTAGAAGCG	59.639	20	252	527	778	CAAGTCAGGAACAGCTGCAA	60.175	20	CTGGGCTTGACTAGAAGCGA	60.668	20	215	563	777
TR40255_c0_g1	TAACTAGGGCTGGCCTCAGA	59.971	20	CCCAGTAAATACAGAACATCACTG	57.768	24	117	3600	3716	GTCAAACCGTGCAACTCCTT	60.156	20	CCCAGTAAATACAGAACATCACTG	57.768	24	272	3445	3716	AAGGTCAAACCGTGCAACTC	60.156	20	CCCAGTAAATACAGAACATCACTG	57.768	24	275	3442	3716
TR17201_c2_g1	CGTTATTCCCACTGCCGTAT	59.845	20	TGCTTATTCTGAACTGGGGG	60.066	20	160	358	517	TTTTGCGAAGGGATCTGAGT	59.813	20	TGCTTATTCTGAACTGGGGG	60.066	20	219	299	517	TTTGCGAAGGGATCTGAGTT	59.813	20	TGCTTATTCTGAACTGGGGG	60.066	20	218	300	517
TR21770_c0_g2	GCGCGCCTCAATCTATAAAC	59.844	20	GCGTTAAGTCCGATGGAAAA	60.074	20	153	1086	1238	GCGCGCCTCAATCTATAAAC	59.844	20	AGTTGCGTTAAGTCCGATGG	60.132	20	157	1086	1242	GCGCGCCTCAATCTATAAAC	59.844	20	TGTATGCCACAAGTTGCGTT	60.18	20	168	1086	1253
TR9386_c0_g1	CATCTGCTACCGTCCGATTT	60.096	20	CGCTATGAGACAGGCACTCA	60.16	20	251	990	1240	AAAGGCATTTTGCATCTGCT	59.851	20	CGCTATGAGACAGGCACTCA	60.16	20	263	978	1240	GGCTCAGATTTGAACGGAAA	60.192	20	CGCTATGAGACAGGCACTCA	60.16	20	280	961	1240
TR14231_c0_g1	TTTGATGACAGACTGGGCAA	60.24	20	CCGCGGGTAATAAAATGAAA	59.799	20	238	1700	1937	TTTTGATGACAGACTGGGCA	60.24	20	CCGCGGGTAATAAAATGAAA	59.799	20	239	1699	1937	ACCACTGGCTCCACTCAAAG	60.298	20	CCGCGGGTAATAAAATGAAA	59.799	20	276	1662	1937
TR9758_c1_g3	GACTGGATCCCGAATTTCAA	59.871	20	GAAAAAGGAATGGACCACCA	59.767	20	199	78	276	GGTCACCATTTCTGCCAATC	60.326	20	GAAAAAGGAATGGACCACCA	59.767	20	236	41	276	TCACCATTTCTGCCAATCAG	59.648	20	GAAAAAGGAATGGACCACCA	59.767	20	234	43	276
TR3312_c3_g1	AAATAGGTCAGCACCCAACG	59.993	20	TCACTTGAAGCTGTGTTGCG	61.201	20	154	2631	2784	ATTCCTATCAACCCAGCACG	59.955	20	TCACTTGAAGCTGTGTTGCG	61.201	20	265	2520	2784	TCTTGGGGCTAGTTTGCAGT	59.875	20	TCACTTGAAGCTGTGTTGCG	61.201	20	198	2587	2784
TR48776_c0_g1	GCTCTTCTTGTGGTGAAGGC	59.997	20	CTGGAGGATCATGTGTGTCG	60.113	20	223	323	545	GCTCTTCTTGTGGTGAAGGC	59.997	20	TGTGCTTGGTTGAGTTCCTG	59.873	20	125	323	447	GCTCTTCTTGTGGTGAAGGC	59.997	20	TTCACCTGTGCTTGGTTGAG	59.873	20	131	323	453
TR5043_c1_g1	TCAGTCAAAAGAACATGAAACGA	59.777	23	GAGATCGGATCCAGGAATCA	59.971	20	229	966	1194	GCCTTCTGAAGTTGCCTATTT	57.647	21	GAGATCGGATCCAGGAATCA	59.971	20	201	994	1194	AGCCTTCTGAAGTTGCCTATTT	58.609	22	GAGATCGGATCCAGGAATCA	59.971	20	202	993	1194
TR41575_c0_g3	GCACATGCCATAAAGGCTTA	58.796	20	CACTGTGGACCCAGATCAGA	59.659	20	279	52	330	TGCACATGCCATAAAGGCT	60.235	19	CACTGTGGACCCAGATCAGA	59.659	20	280	51	330	TGGCAGTCCACTACACAAATG	59.624	21	CACTGTGGACCCAGATCAGA	59.659	20	218	113	330
TR41575_c0_g3	CTGATCTGGGTCCACAGTGA	59.659	20	AATGGCAAATCCACCCATTA	60.016	20	280	312	591	TCCAGCCAGGAATACACAGA	59.241	20	ATTAATGGCAAATCCACCCA	60.016	20	179	416	594	TCCAGCCAGGAATACACAGA	59.241	20	AATGGCAAATCCACCCATTA	60.016	20	176	416	591
TR26855_c2_g2	TTTGCAGGGGTTTCCATATC	59.762	20	GCAACACCCGCTAAGAAAGA	60.386	20	176	4187	4362	TTTGCAGGGGTTTCCATATC	59.762	20	AGCAACACCCGCTAAGAAAG	59.517	20	177	4187	4363	TCTTTGCAGGGGTTTCCATA	60.439	20	AGCAACACCCGCTAAGAAAG	59.517	20	179	4185	4363
TR26855_c2_g2	CTACAGACTTCCTGGCTCGG	60.005	20	AGGACAAGAGGCACTGGAGA	59.986	20	166	4587	4752	CTACAGACTTCCTGGCTCGG	60.005	20	GGACAAGAGGCACTGGAGAG	59.986	20	165	4587	4751	CTACAGACTTCCTGGCTCGG	60.005	20	CAAGAGGCACTGGAGAGACC	59.986	20	162	4587	4748
TR9311_c1_g1	TCTCTTCCTTGCCTTGCATT	59.955	20	TACCGGAGACCAAGATGCTC	60.218	20	257	793	1049	TTCCTTGCCTTGCATTTTCT	59.823	20	TACCGGAGACCAAGATGCTC	60.218	20	253	797	1049	CTTGCCTTGCATTTTCTTCC	59.823	20	TACCGGAGACCAAGATGCTC	60.218	20	250	800	1049
TR10669_c8_g6	TTGAAACCAGGCGTTAAACC	59.975	20	GGGGCACAACGTATGTCTCT	59.997	20	142	199	340	AACACCGGTTAGGTGGACTG	59.884	20	GGGGCACAACGTATGTCTCT	59.997	20	185	156	340	CCTAGCTGTTGAAACCAGGC	59.875	20	GGGGCACAACGTATGTCTCT	59.997	20	150	191	340
TR43412_c0_g1	GTCGGCAGAGTGGAAAAAGA	60.375	20	TCAAGGCCTCCTGACTGTCT	59.986	20	203	691	893	GTCGGCAGAGTGGAAAAAGA	60.375	20	GGCGACACAAAAAGGTTGAT	59.978	20	246	691	936	TCGGCAGAGTGGAAAAAGAG	60.508	20	TCAAGGCCTCCTGACTGTCT	59.986	20	202	692	893
TR50771_c2_g1	GCCACAACAACATCAAATGC	59.979	20	CAGGGGATTGTGGTAGAGGA	59.92	20	263	4198	4460	CTCATGCTTTGCCTCAACAA	59.988	20	CAGGCTGGCTAACAAATGGT	60.132	20	129	4233	4361	GCCACAACAACATCAAATGC	59.979	20	CAGGCTGGCTAACAAATGGT	60.132	20	164	4198	4361
TR48697_c3_g4	TGACTTGCTTCGCTCAACAG	60.324	20	GAAATTCCCCTACCCTGAGC	59.903	20	209	1169	1377	ATGACTTGCTTCGCTCAACA	59.596	20	GAAATTCCCCTACCCTGAGC	59.903	20	210	1168	1377	TGACTTGCTTCGCTCAACAG	60.324	20	CCTGAGCTGCTTTCAAGGAT	59.574	20	196	1169	1364
TR46113_c0_g1	GCAGCTGTGACAAACCCATA	59.722	20	GAATAGATGCCTGCCAAACC	59.533	20	271	3439	3709	AAAGGCAGCTGTGACAAACC	60.299	20	GAATAGATGCCTGCCAAACC	59.533	20	275	3435	3709	CAAAGGCAGCTGTGACAAAC	59.49	20	GAATAGATGCCTGCCAAACC	59.533	20	276	3434	3709
TR21382_c0_g1	GCTGATGCTGTTGAGACTGC	59.739	20	CATATGTTCCATGCACCCAG	59.799	20	238	2078	2315	GCTGATGCTGTTGAGACTGC	59.739	20	TCAACTTAAAGCCGTCGGTC	60.249	20	174	2078	2251	TGAAAACTGGTTGTGGTTGC	59.591	20	TCAACTTAAAGCCGTCGGTC	60.249	20	204	2048	2251
TR27127_c0_g3	ACGGCAAAAACCTTCATCAC	59.978	20	ATTAGCTTCGACCTTCGCAA	59.982	20	142	598	739	CGACAACTCCCACAAATCCT	59.966	20	ATTAGCTTCGACCTTCGCAA	59.982	20	107	633	739	GAAGGCAGACTCAATCAGGC	59.957	20	ATTAGCTTCGACCTTCGCAA	59.982	20	273	467	739
TR49598_c0_g1	GGAAAACTATGATGCTGTAACCA	58.2	23	CAAGGTGTGGACTTGCAGAA	59.873	20	273	1132	1404	TTCAAACAGATGTTACAAATGGG	58.909	23	CCTGCAATCTGTGGATTTTG	59.123	20	267	1079	1345	AGGAAAACTATGATGCTGTAACCA	59.122	24	CAAGGTGTGGACTTGCAGAA	59.873	20	274	1131	1404
TR55349_c0_g1	CCAAGCTCAGCACACTTCAA	60.175	20	GCAGAAAAGTCTCCTGCCTT	58.672	20	272	731	1002	CCAAGCTCAGCACACTTCAA	60.175	20	AGCAGAAAAGTCTCCTGCCTT	59.652	21	273	731	1003	AATCTCCCACTTTCCAAGCA	59.67	20	GCAGAAAAGTCTCCTGCCTT	58.672	20	235	768	1002
TR55349_c0_g1	TGCAACTTTAACAGCCTTCG	59.108	20	AATTGGTTGCTTTCTGGCTT	58.836	20	164	1160	1323	TTGCAACTTTAACAGCCTTCG	60.415	21	AATTGGTTGCTTTCTGGCTT	58.836	20	165	1159	1323	AAAAAGAAACACCCACAAGACC	59.411	22	AGCGACAGTGGTCGAGTTCT	60.057	20	102	1127	1228
TR23616_c2_g2	CAAAATCCCTGCGAGACAAT	60.074	20	TTGAAACCAGGCGTTAAACC	59.975	20	178	1273	1450	GAAAGCCCATTCAGCACATT	60.081	20	TTGAAACCAGGCGTTAAACC	59.975	20	262	1189	1450	TCTGTTGATACACCGGCAAA	60.111	20	TTGAAACCAGGCGTTAAACC	59.975	20	194	1257	1450
TR10318_c0_g1	CCATACATTATAATTCGGATAACGC	59.891	25	CCCTTCGTTACTCTCTCCCC	60.067	20	131	10	140	CCATACATTATAATTCGGATAACGC	59.891	25	CCCCTTCGTTACTCTCTCCC	60.067	20	132	10	141	GCCATACATTATAATTCGGATAACG	59.891	25	CCCTTCGTTACTCTCTCCCC	60.067	20	132	9	140
TR31996_c2_g1	CAATTTGCACAGACACCTGG	60.152	20	TTTGTGAAAATCTGACCCGA	59.097	20	184	430	613	TGCACAGACACCTGGACAAT	60.162	20	TTTGTGAAAATCTGACCCGA	59.097	20	179	435	613	CAATTTGCACAGACACCTGG	60.152	20	TTTTGTGAAAATCTGACCCG	58.597	20	185	430	614
TR43729_c0_g1	TGGATTTAAACTGATCGCCC	59.901	20	TGTTGAATGAAACATCTCTGGAA	59.601	23	258	56	313	GTGCCAGCTGATCTGGATTT	60.226	20	TGTTGAATGAAACATCTCTGGAA	59.601	23	271	43	313	TGGATTTAAACTGATCGCCC	59.901	20	CTGTTGAATGAAACATCTCTGGA	59.228	23	259	56	314
TR12870_c0_g1	TGATATCCGAGGCTTTCTGG	60.17	20	ACTGGACCGGGATATTGTCA	60.195	20	158	591	748	TGCTGGATCCTTCTTGACCT	59.803	20	ACTGGACCGGGATATTGTCA	60.195	20	223	526	748	CTGCTGGATCCTTCTTGACC	59.803	20	ACTGGACCGGGATATTGTCA	60.195	20	224	525	748
TR30205_c0_g2	CCAGGAGCTTGATTTCTCCA	60.331	20	TGTTGTTGGGGGTTTGTATG	59.145	20	273	1431	1703	TCCAGGAGCTTGATTTCTCC	59.361	20	TGTTGTTGGGGGTTTGTATG	59.145	20	274	1430	1703	CCAGGAGCTTGATTTCTCCA	60.331	20	TTGTTGGGGGTTTGTATGAA	58.719	20	271	1431	1701
TR46308_c0_g1	GTTGCGTCATGGGAAAAGAT	59.939	20	TTTGGCGCATGTCATAAAAA	60.074	20	243	551	793	AGAAAAAGGTTGCGTCATGG	60.11	20	TTTGGCGCATGTCATAAAAA	60.074	20	251	543	793	TTTGGAAGAAAAAGGTTGCG	60.215	20	TTTGGCGCATGTCATAAAAA	60.074	20	257	537	793
TR23742_c0_g1	TATCATTCGGCAGATGAGCA	60.329	20	CATCCAATCATGTGGTCAGG	59.762	20	190	853	1042	TATCATTCGGCAGATGAGCA	60.329	20	CCAATCAGCTGGTCAGGACT	60.261	20	213	853	1065	CACACTTTGGCAAACACCAC	60.049	20	GGCCACGTTGTTGATCATTT	60.765	20	261	656	916
TR54922_c0_g3	TGCAAGGAATATGCTCCAAA	59.257	20	TTGTTCTTGCTCATAACCCATTT	59.891	23	277	2474	2750	TTGCAAGGAATATGCTCCAA	59.257	20	TTGTTCTTGCTCATAACCCATTT	59.891	23	278	2473	2750	TGCAAGGAATATGCTCCAAA	59.257	20	TGTTCTTGCTCATAACCCATTT	58.629	22	276	2474	2749
TR54373_c0_g1	CCCTTGGGATAACAGCCATA	59.778	20	TGTTGGACACCATTTTCAGG	59.389	20	211	69	279	CAGGTGAGCTAAAAAGGGCA	60.378	20	TGTTGGACACCATTTTCAGG	59.389	20	266	14	279	GGGATAACAGCCATATCCCA	59.605	20	TGTTGGACACCATTTTCAGG	59.389	20	206	74	279
TR9564_c1_g1	TAAGGGCTTGCTCATTTCGT	59.845	20	TGCTACTGTGGGCATTGAAA	60.257	20	197	143	339	TAAGGGCTTGCTCATTTCGT	59.845	20	TTGCTACTGTGGGCATTGAA	60.257	20	198	143	340	AGGGCTTGCTCATTTCGTTA	59.845	20	TGCTACTGTGGGCATTGAAA	60.257	20	195	145	339
TR9564_c1_g1	GGCTTTTATTGCATGGGAAA	59.907	20	GAATTGAAGTTGTGCCCGAT	59.939	20	237	755	991	ATGGCTTTTATTGCATGGGA	60.289	20	GAATTGAAGTTGTGCCCGAT	59.939	20	239	753	991	GGCTTTTATTGCATGGGAAA	59.907	20	ACGGCTAACTTTCTTGGGCT	60.262	20	276	755	1030
TR9406_c3_g3	TGTGACGACACTGGGAACAT	60.005	20	ACTATCATTATCATCGTTAACAACAAA	57.436	27	270	1535	1804	TAGCTTGTGACGACACTGGG	59.897	20	ACTATCATTATCATCGTTAACAACAAA	57.436	27	275	1530	1804	TGACGACACTGGGAACATTG	60.57	20	ACTATCATTATCATCGTTAACAACAAA	57.436	27	268	1537	1804
TR9039_c0_g2	TTCAAGAGGCCATCAAAAAT	57.277	20	GCCTTCTCAAAATATTGCCC	58.649	20	123	11	133	ATTCAAGAGGCCATCAAAAA	57.277	20	GCCTTCTCAAAATATTGCCC	58.649	20	124	10	133	ATTCAAGAGGCCATCAAAAA	57.277	20	TTGCCTTCTCAAAATATTGCC	59.202	21	126	10	135
TR39814_c0_g1	GTGGGAGGGTGGAGTTGATA	59.779	20	CCAGGCAGTCTTTCATAGCA	59.024	20	248	280	527	TATGTGTGGGAGGGTGGAGT	60.238	20	CCAGGCAGTCTTTCATAGCA	59.024	20	253	275	527	GTGGGAGGGTGGAGTTGATA	59.779	20	ACCAGGCAGTCTTTCATAGCA	59.89	21	249	280	528
TR39814_c0_g1	TTGCATCGTGGTCAGTGAGT	60.319	20	ACACAATTAAAAGTGGGGCA	57.999	20	175	873	1047	TTGCATCGTGGTCAGTGAGT	60.319	20	CACAATTAAAAGTGGGGCAT	57.487	20	174	873	1046	CCTATTTGCATCGTGGTCAG	59.148	20	ACACAATTAAAAGTGGGGCA	57.999	20	180	868	1047
TR9005_c1_g1	TTTCCTATCAATGGTTTCCCC	60.006	21	TGGATGGTTGCTCTTCACAG	59.831	20	225	132	356	TTTCCTATCAATGGTTTCCCC	60.006	21	GCCTGATTATGGATGGTTGC	60.304	20	234	132	365	TTCCTATCAATGGTTTCCCC	58.69	20	TGGATGGTTGCTCTTCACAG	59.831	20	224	133	356
TR55434_c0_g1	GGAAGACGAGTGGGACAGAA	60.238	20	CCACTGCCTCTGTGTCTTCA	60.022	20	262	90	351	GAGGAAGACGAGTGGGACAG	59.835	20	TCATCCACTGCCTCTGTGTC	59.827	20	268	88	355	GGAAGACGAGTGGGACAGAA	60.238	20	TCATCCACTGCCTCTGTGTC	59.827	20	266	90	355
TR44922_c0_g1	ACGCCAATCAGGTCTCAAGT	59.727	20	GCAGATTGTTTCTTGCCACA	59.847	20	219	688	906	ACGCCAATCAGGTCTCAAGT	59.727	20	TAGGCCGCAGATTGTTTCTT	59.845	20	225	688	912	CATACGCCAATCAGGTCTCA	59.673	20	GCAGATTGTTTCTTGCCACA	59.847	20	222	685	906
TR6214_c0_g1	GACACGAGTATGTTGGGGCT	59.997	20	TGCACAAAACAGGCTCTCAC	60.032	20	120	245	364	TGCTCATGGGATGAGAAACA	60.201	20	TGCACAAAACAGGCTCTCAC	60.032	20	221	144	364	GACACGAGTATGTTGGGGCT	59.997	20	TCTTTTCCCTTCATCTCCCA	59.6	20	269	245	513
TR38490_c0_g1	GCACTACAGAGATCGCCACA	60.016	20	TTTGTCATCAGCCATTTCCA	60.049	20	253	3591	3843	GATCAGAGCTCGCGAAAATC	60.066	20	TTTGTCATCAGCCATTTCCA	60.049	20	151	3693	3843	AAATCCACCAAAAGCTGACG	60.11	20	TTTGTCATCAGCCATTTCCA	60.049	20	136	3708	3843
TR31954_c0_g1	TGTGATGACCTGCCTCAAAA	60.24	20	TGGCAAAGATACTGACAGCAA	59.478	21	262	4104	4365	CATGTGATGACCTGCCTCAA	60.688	20	TGGCAAAGATACTGACAGCAA	59.478	21	264	4102	4365	ATGTGATGACCTGCCTCAAA	59.09	20	TGGCAAAGATACTGACAGCAA	59.478	21	263	4103	4365
TR7152_c0_g2	GTCTGCTGCAGTGAGGTTGA	60.187	20	TACCAGTGTGCAGAAGGACG	59.897	20	273	1445	1717	TCGATATCCTTTCCTGCCAC	60.036	20	TGTACAGCCATCAATCCACG	60.539	20	232	1393	1624	TATCCTTTCCTGCCACCAAC	59.933	20	CACTCCTTTGGAACAGGTGG	60.536	20	170	1397	1566
TR27955_c0_g2	TAGGAGACTCGGACTCGGAA	59.943	20	TTAGCCCGAACTAATGCTGC	60.364	20	275	1100	1374	TAGGAGACTCGGACTCGGAA	59.943	20	CTAATGCTGCGAATTTGTGC	59.472	20	265	1100	1364	GAGACTCGGACTCGGAAAAA	59.405	20	TTAGCCCGAACTAATGCTGC	60.364	20	272	1103	1374
TR14783_c0_g3	CCTGCTAAAAGACAGGCTGG	60.008	20	TAAACTGGCACACTTCAGCG	60.05	20	265	1064	1328	TCCAGGTCAGATCCAAAAGG	60.042	20	GCAGGAAACACACCTTCCAT	59.973	20	212	1148	1359	CCAGGTCAGATCCAAAAGGA	60.042	20	GCAGGAAACACACCTTCCAT	59.973	20	211	1149	1359
TR25507_c50_g9	CCATGGTTACCCATTCTCCA	60.572	20	ATACAAGCAGGTGCGAAAGC	60.416	20	272	570	841	CCATGGTTACCCATTCTCCA	60.572	20	AAAAAGGCATGCTGTGTTCA	59.322	20	149	570	718	CCATGGTTACCCATTCTCCA	60.572	20	TACAAGCAGGTGCGAAAGC	60.15	19	271	570	840
TR57492_c0_g1	GTGGGTCTACCGCTGATGAT	59.957	20	GTTAAACCCCAGCACCTCAA	59.971	20	224	4293	4516	GTGGGTCTACCGCTGATGAT	59.957	20	TAAACCCCAGCACCTCAATC	59.933	20	222	4293	4514	GTGGGTCTACCGCTGATGAT	59.957	20	AATCTGTCCGTTAACACGGG	59.853	20	206	4293	4498
TR57492_c0_g1	GCAGTGAGACAAGTGGCAAA	60.032	20	TGTCAGATCAGGGTTTGCAG	59.831	20	194	6733	6926	CAAGTGGCAAATGAAAAGCA	59.849	20	TGTCAGATCAGGGTTTGCAG	59.831	20	185	6742	6926	TCAGCAGTGAGACAAGTGGC	60.187	20	TGTCAGATCAGGGTTTGCAG	59.831	20	197	6730	6926
TR23265_c0_g1	GTTCCGGTTTTTGGGTTTCT	60.2	20	AACATCAAAATGACGGCACA	59.972	20	210	940	1149	GCTACAAGAACCACTTCGGC	59.882	20	GGAAACTACACTCCCACCCA	59.82	20	236	851	1086	GCTACAAGAACCACTTCGGC	59.882	20	CTACACTCCCACCCACCATC	60.238	20	231	851	1081
TR42722_c0_g1	TCACATTATCTGTTGCGGGA	60.073	20	TTTATGACAAAAAGAATGTGTGTCT	57.048	25	174	826	999	GGAAGAATGGACGTTTGGAA	59.91	20	TTTATGACAAAAAGAATGTGTGTCT	57.048	25	113	887	999	TCTGTTGCGGGATTTTAAGC	60.209	20	TTTATGACAAAAAGAATGTGTGTCT	57.048	25	166	834	999
TR6630_c0_g1	TTTGTCTGACATGGTTTGTTTTT	58.575	23	TGGAACTGCATTGGTGGTTA	59.964	20	280	372	651	CAGCACATTTTATCTTGTTTTGC	58.864	23	ATAAAGGGCCCTCAGTGTGA	59.55	20	232	310	541	CAGCACATTTTATCTTGTTTTGCT	59.74	24	ATAAAGGGCCCTCAGTGTGA	59.55	20	232	310	541
TR44244_c0_g1	GCCCAATTTAAATGCCAGAT	58.901	20	CGAGTCATTTGAAAAGGGAAG	58.82	21	184	361	544	GCCCAATTTAAATGCCAGAT	58.901	20	CGAGTCATTTGAAAAGGGAA	57.795	20	184	361	544	GCCCAATTTAAATGCCAGAT	58.901	20	CGAGTCATTTGAAAAGGGAAGT	59.631	22	184	361	544
TR19150_c0_g1	TACCAGTTTAGGGTGCCTGG	59.986	20	CAATTTCTTCGCTTTCATTCAA	59.363	22	238	1425	1662	TGCCATGACAACATGTCCTT	59.967	20	CAATTTCTTCGCTTTCATTCAA	59.363	22	135	1528	1662	AATCCTCAGATGGACGGTTG	59.927	20	CAATTTCTTCGCTTTCATTCAA	59.363	22	153	1510	1662
TR10195_c0_g1	CGAAAGCTACATGCAGCAAA	60.155	20	TGGATCATTAGCTCTTCCAGA	57.501	21	247	570	816	TGCCAATTTTGCAATCTCAG	59.809	20	TGGATCATTAGCTCTTCCAGA	57.501	21	189	628	816	CGAAAGCTACATGCAGCAAA	60.155	20	TGGATCATTAGCTCTTCCAGATG	60.587	23	247	570	816
TR10195_c0_g1	GCCTGCATGCTAGTCAATGT	58.906	20	TTGTGAAATGCCATGTGTGA	59.516	20	125	1003	1127	GCCTGCATGCTAGTCAATGT	58.906	20	CGCATGAGATTTGAGACTGG	59.394	20	253	1003	1255	GCCTGCATGCTAGTCAATGT	58.906	20	TTGTGAAATGCCATGTGTGAT	59.838	21	125	1003	1127
TR47946_c0_g1	TTGCCCTTGATGATCACGTA	60.073	20	GACGACCGTTCGTTTTGATT	59.978	20	147	1247	1393	ACGATCGTGAATTCTCAGGG	60.073	20	GACGACCGTTCGTTTTGATT	59.978	20	126	1268	1393	ATCTGCCATTTGTTGGCTTC	60.081	20	GACGACCGTTCGTTTTGATT	59.978	20	102	1292	1393
TR7989_c1_g1	AAATCAGGATTCATGTGGAAGTTT	60.115	24	TGAATCACAAATCCATCTTGACA	60.359	23	247	600	846	AATCAGGATTCATGTGGAAGTTT	58.883	23	TGAATCACAAATCCATCTTGACA	60.359	23	246	601	846	AAATCAGGATTCATGTGGAAGTT	58.883	23	TGAATCACAAATCCATCTTGACA	60.359	23	247	600	846
TR7989_c1_g1	GGTCATTGTTGAATCCACCC	60.034	20	ATGTCGTACATGGTTGCTGG	59.445	20	258	1121	1378	TGTTGAATCCACCCTTGTGA	59.935	20	ATGTCGTACATGGTTGCTGG	59.445	20	252	1127	1378	AATCCACCCTTGTGACGTTC	59.827	20	ATGTCGTACATGGTTGCTGG	59.445	20	247	1132	1378
TR51481_c0_g1	GTCAACTGCTCGAAGGAACC	59.851	20	CCCGCTTTTGATAGGTGTCT	59.195	20	248	112	359	GTCAACTGCTCGAAGGAACC	59.851	20	ACCCGCTTTTGATAGGTGTC	59.056	20	249	112	360	GTCAACTGCTCGAAGGAACC	59.851	20	CCATACAGTACCCGCTTTTGA	60.004	21	258	112	369
TR8163_c0_g1	TAAACGTCTTGCTGCACTGG	60.05	20	TCCTTTTATTTCGTCCAGTTTGA	59.991	23	253	1070	1322	TAAACGTCTTGCTGCACTGG	60.05	20	TTCCTTTTATTTCGTCCAGTTTG	59.544	23	254	1070	1323	TAAACGTCTTGCTGCACTGG	60.05	20	TCCTTTTATTTCGTCCAGTTTG	58.298	22	253	1070	1322
TR7478_c0_g1	CAGCAAACGTTCATAGCTTCC	59.897	21	CAAGTGTTTGCTGGCATTTC	59.322	20	232	435	666	CAGCAAACGTTCATAGCTTCC	59.897	21	AGTGTTTGCTGGCATTTCGT	60.699	20	230	435	664	CAGCAAACGTTCATAGCTTCC	59.897	21	ATTTGACCAGGTGTGCCAAC	60.823	20	178	435	612
TR31983_c1_g9	CTGCCTTAATTTATGCCTGTG	57.501	21	TTTTATGATCTTGGGCCCTG	59.894	20	120	635	754	CAACTATAAGGCGATAATGCAGG	60.019	23	TTTATGATCTTGGGCCCTGT	59.387	20	275	479	753	TGCCTTAATTTATGCCTGTGT	57.354	21	TTTTATGATCTTGGGCCCTG	59.894	20	119	636	754
TR50780_c0_g1	AGTTCCGTACCATGCCAGAC	59.997	20	AGATGGTTCTGTCACCTCCG	60.112	20	218	1002	1219	GTTCCGTACCATGCCAGACT	59.997	20	AGATGGTTCTGTCACCTCCG	60.112	20	217	1003	1219	AAAGTTCCGTACCATGCCAG	59.993	20	AGATGGTTCTGTCACCTCCG	60.112	20	220	1000	1219
TR30593_c0_g2	TGTACTGGCTTTTACACGCA	58.006	20	TGAACATATTTACGCCTCTTTCAA	60.025	24	226	1471	1696	GTGTACTGGCTTTTACACGCA	58.909	21	TGAACATATTTACGCCTCTTTCAA	60.025	24	227	1470	1696	TGTACTGGCTTTTACACGCA	58.006	20	TGAACATATTTACGCCTCTTTCA	58.818	23	226	1471	1696
TR15770_c0_g1	AATGCCTTCATAATTTGCCG	59.928	20	TTCTTTTTCTTTCTTTTCCTCTTTTC	59.117	26	215	1963	2177	AATGCCTTCATAATTTGCCG	59.928	20	TCTTTTTCTTTTTCTTTCTTTTCCTC	59.117	26	220	1963	2182	AATGCCTTCATAATTTGCCG	59.928	20	TCTCTTTTTCTTTTTCTTTCTTTTCC	59.117	26	222	1963	2184
TR39773_c0_g1	ACTGCAATGGGACCTTCATC	59.934	20	CGCAACACCTCTTTGATTTG	59.317	20	187	596	782	CTGCAATGGGACCTTCATCT	60.073	20	CGCAACACCTCTTTGATTTG	59.317	20	186	597	782	CTCACTGACATTTCTGGGCA	59.831	20	CGCAACACCTCTTTGATTTG	59.317	20	149	634	782
TR50728_c0_g1	GAGACTGGTTTCCATGCTCAG	59.859	21	GGACCACCTTTGTCGTCTGT	60.009	20	237	22	258	GAGACTGGTTTCCATGCTCA	58.802	20	GGACCACCTTTGTCGTCTGT	60.009	20	237	22	258	TTTGAGACTGGTTTCCATGCT	59.726	21	GGACCACCTTTGTCGTCTGT	60.009	20	240	19	258
TR39491_c0_g1	GTTGCTGCTACGCCTAAACC	59.911	20	GGCCTTAGGCTGATTTTGTG	59.708	20	109	504	612	GTTGCTGCTACGCCTAAACC	59.911	20	TGGCCTTAGGCTGATTTTGT	59.708	20	110	504	613	GTTGCTGCTACGCCTAAACC	59.911	20	TGTGGCCTTAGGCTGATTTT	59.708	20	112	504	615
TR29319_c1_g1	CAAGGTGGACAAAATCCTTAACA	60.255	23	TGCAGTCACTGAACCAAACTAAA	59.836	23	153	474	626	AACAAGGTGGACAAAATCCTT	57.565	21	TGCAGTCACTGAACCAAACTAAA	59.836	23	155	472	626	CAAGGTGGACAAAATCCTTAACA	60.255	23	TGCAGTCACTGAACCAAACTAA	58.484	22	153	474	626
TR4502_c0_g1	GATTTTTCGCGTTAAATGTGC	59.621	21	ATTTTGAGACCGGTGACGAC	59.973	20	201	5	205	GATTTTTCGCGTTAAATGTGC	59.621	21	CTTGCAAAAGGATGTTGGGT	59.971	20	127	5	131	GATTTTTCGCGTTAAATGTGC	59.621	21	ACTTGCAAAAGGATGTTGGG	59.971	20	128	5	132
TR21713_c0_g2	CTGCATTTTGATGCAGCTTT	59.066	20	AACAAACCTGGTGGGGTTTT	60.488	20	187	569	755	CTTGAGTTTGAACTCGGTGCT	59.529	21	ATCTGATTGGCTGAAATGGC	60.043	20	228	661	888	CTTGAGTTTGAACTCGGTGCT	59.529	21	CAAGCATCTGATTGGCTGAA	59.948	20	233	661	893
TR35327_c0_g1	TTGTTCCAATAGTGAAAGTGGC	59.134	22	CCTGCCCAACTAAAACCAAA	59.968	20	210	1131	1340	TTGTTCCAATAGTGAAAGTGGCT	60.048	23	CCTGCCCAACTAAAACCAAA	59.968	20	210	1131	1340	TGTTCCAATAGTGAAAGTGGCTT	60.048	23	CCTGCCCAACTAAAACCAAA	59.968	20	209	1132	1340
TR50779_c0_g1	AAATTGGCGGTGATTATTGC	59.801	20	GGACCCACTAGAGTCGCAAG	59.867	20	185	33	217	TAGTGGTTGAAATTGGCGGT	60.365	20	GGACCCACTAGAGTCGCAAG	59.867	20	194	24	217	CTAGTGGTTGAAATTGGCGG	60.493	20	GGACCCACTAGAGTCGCAAG	59.867	20	195	23	217
TR25820_c0_g1	TTTTGGTCTGTGCCAAATGA	60.088	20	ATGCGAAAATTAAACCTGCG	60.095	20	155	2313	2467	TTGATTTTGGTCTGTGCCAA	60.088	20	ATGCGAAAATTAAACCTGCG	60.095	20	159	2309	2467	TTCCCCTTGATTTTGGTCTG	59.903	20	ATGCGAAAATTAAACCTGCG	60.095	20	165	2303	2467
TR55493_c0_g1	TGTGAGTTTGATGGGCAGAC	59.682	20	TCCATTGCAAAAACTGTCCA	60.088	20	227	2133	2359	TTTTGTGAGTTTGATGGGCA	60.088	20	CCATTGCAAAAACTGTCCAA	59.561	20	229	2130	2358	TTGTGAGTTTGATGGGCAGA	60.24	20	CCATTGCAAAAACTGTCCAA	59.561	20	227	2132	2358
TR20212_c0_g1	TGAATTTTGGCTGAACTCCC	60.051	20	CAAAACTCCCCTGTTAAACACA	59.038	22	127	710	836	GAATTTTGGCTGAACTCCCA	60.051	20	CAAAACTCCCCTGTTAAACACA	59.038	22	126	711	836	TGAATTTTGGCTGAACTCCC	60.051	20	ACAAAACTCCCCTGTTAAACACA	59.827	23	128	710	837
TR25530_c6_g1	TCCTTGTTTTGAATGGCACA	60.088	20	CATCAGAGGGTACGTTCACAA	58.635	21	116	185	300	GCGAACAGTTTAGGTCCAGC	59.882	20	CATCAGAGGGTACGTTCACAA	58.635	21	263	38	300	TCCTTGTTTTGAATGGCACA	60.088	20	ACATCAGAGGGTACGTTCACAA	59.52	22	117	185	301
TR3052_c0_g1	GGCTGTGTGGTCATAGGTCA	59.551	20	TGGTTACAAGCAAGACAGGTG	58.837	21	196	500	695	TGGCTGTGTGGTCATAGGTC	59.551	20	TGGTTACAAGCAAGACAGGTG	58.837	21	197	499	695	GGCTGTGTGGTCATAGGTCA	59.551	20	TTGGTTACAAGCAAGACAGGTG	60.203	22	197	500	696
TR41519_c0_g1	TGGTTGCTTAAGATGCAAAAA	58.482	21	TCACTGAAACAGTATTACATGCACA	59.631	25	213	1646	1858	TGGTTGCTTAAGATGCAAAA	57.053	20	TCACTGAAACAGTATTACATGCACA	59.631	25	213	1646	1858	TGGTTGCTTAAGATGCAAAAA	58.482	21	CACTGAAACAGTATTACATGCACAA	59.174	25	212	1646	1857
TR57442_c2_g1	CAGACAGACAGGGAATGAAGG	59.706	21	TTATGTCCTCGTTTGAGGCG	61.157	20	270	1049	1318	CAGACAGACAGGGAATGAAGG	59.706	21	GGAGGAGCCCTAAAACTGAGA	59.835	21	251	1049	1299	CAGACAGACAGGGAATGAAGG	59.706	21	CGGAGGAGCCCTAAAACTG	59.815	19	252	1049	1300
TR29848_c0_g1	TATAACTTTGGGGCCTTGCT	58.718	20	TTGATGTTTTTGTCAGGCACA	60.142	21	263	913	1175	TAACTTTGGGGCCTTGCTAT	58.718	20	TTGATGTTTTTGTCAGGCACA	60.142	21	261	915	1175	ATAACTTTGGGGCCTTGCTA	58.718	20	TTGATGTTTTTGTCAGGCACA	60.142	21	262	914	1175
TR1595_c0_g1	TGCCAACAAAACTCCTGACA	60.278	20	ATCATGTCAGAACAACGGCA	60.12	20	244	2621	2864	TGCCAACAAAACTCCTGACA	60.278	20	TCATGTCAGAACAACGGCAT	60.12	20	243	2621	2863	TGCCAACAAAACTCCTGACA	60.278	20	GAACAACGGCATGGGATACT	59.82	20	235	2621	2855
TR57444_c0_g1	GCACACAGCCGATCGATAAT	61.034	20	GGATCCGTTAATGCAAGGAA	59.901	20	242	426	667	GCACACAGCCGATCGATAAT	61.034	20	GAAAAGCCTGGTGTGCATTT	60.118	20	181	426	606	GCACACAGCCGATCGATAAT	61.034	20	TGGCACTAGAAAAGCCTGGT	59.875	20	189	426	614
TR42243_c0_g1	AAATGACGAGGCTTCACGAG	60.397	20	TTTGGTATCAAGAAAGGCCG	60.067	20	149	796	944	ACCAGAAATCAGCGGCATAC	60.103	20	GATACGGCCGTGACAAAAAC	60.374	20	264	656	919	ACCAGAAATCAGCGGCATAC	60.103	20	AGAAAGGCCGAAACCGATAC	60.451	20	279	656	934
TR6624_c2_g1	CAAATAAAGCTTGGTGCATTGA	60.13	22	ATGCTGGCTGATGAGGATCT	59.792	20	267	6	272	CAAATAAAGCTTGGTGCATTGA	60.13	22	GGGGTTGGTTGTCAGTTGTC	60.261	20	193	6	198	CAAATAAAGCTTGGTGCATTGA	60.13	22	TGCTGGCTGATGAGGATCTA	59.502	20	266	6	271
TR46593_c0_g1	AGCTGTCATTTTGCCTCGAT	59.843	20	GTATCTGCAACCGCCCTTT	60.088	19	170	897	1066	CTGTCATTTTGCCTCGATCA	59.799	20	GTATCTGCAACCGCCCTTT	60.088	19	168	899	1066	GCCCACACCATTATGTCCTT	59.676	20	GTATCTGCAACCGCCCTTT	60.088	19	102	965	1066
TR57418_c1_g1	TTTAATCCCCAGGCACAGTC	59.933	20	GCGCTTGTGGGTTAAAGAAG	59.883	20	226	725	950	TCTTTAATCCCCAGGCACAG	60.066	20	GGATTGAAATTTCCGGTTGA	59.739	20	181	723	903	TCTTTAATCCCCAGGCACAG	60.066	20	TTGAAATTTCCGGTTGATCC	59.739	20	178	723	900
TR25346_c0_g1	CTGGTCACAAAGACACAGCAA	59.93	21	TGCAGCATAAACTCTTCAGGG	60.393	21	241	707	947	TCCGTTCCAGGAATGTAACAC	59.845	21	TGCAGCATAAACTCTTCAGGG	60.393	21	276	672	947	TCACAAAGACACAGCAACCA	58.839	20	TGCAGCATAAACTCTTCAGGG	60.393	21	237	711	947
TR38233_c0_g1	TCCCTTGATCATCAGAGCAAT	59.644	21	AATGCGATCCGAAATTCTGT	59.533	20	257	991	1247	TCCCTTGATCATCAGAGCAAT	59.644	21	TGCGATCCGAAATTCTGTAA	59.257	20	255	991	1245	TGAAACCGTTAGTCCCTTGA	58.201	20	AATGCGATCCGAAATTCTGT	59.533	20	269	979	1247
TR7329_c0_g1	TAAGATGGCGTCATATCGCA	60.201	20	TGGTGTCATTTTTCTGGATGT	57.908	21	140	3323	3462	TAAGATGGCGTCATATCGCA	60.201	20	AAATGGTGTCATTTTTCTGGATG	60.102	23	143	3323	3465	TAAGATGGCGTCATATCGCA	60.201	20	AATGGTGTCATTTTTCTGGATG	58.812	22	142	3323	3464
TR16418_c0_g2	TTGAGTTTTGGTACCCCTGC	59.971	20	TAAGAGCGCAGTTTTGGGTT	59.883	20	274	220	493	TTGAGTTTTGGTACCCCTGC	59.971	20	GGGTTGCCCATTGTTTGTAG	60.227	20	259	220	478	CCCAACAGAACTGTGCATTG	60.152	20	TAAGAGCGCAGTTTTGGGTT	59.883	20	165	329	493
TR55244_c0_g1	TTGGAAAGTAAAACCCTGCAC	59.121	21	TAAATGGGTGTCCAAGGAGG	59.784	20	188	1636	1823	TTGGAAAGTAAAACCCTGCAC	59.121	21	ATGCCTGCAATTCTGGATCT	59.658	20	227	1636	1862	TTGGAAAGTAAAACCCTGCACT	60.035	22	TAAATGGGTGTCCAAGGAGG	59.784	20	188	1636	1823
TR26628_c0_g1	CCGTTAATACAAATATAAACAAAGCA	57.941	26	GCCCAAATTTGACAGACGAT	59.939	20	248	18	265	CCGTTAATACAAATATAAACAAAGCA	57.941	26	GACTCTATTCCATCGCCGAA	60.177	20	278	18	295	CCGTTAATACAAATATAAACAAAGCA	57.941	26	TCTATTCCATCGCCGAAGAG	60.309	20	275	18	292
TR9610_c0_g1	TCCACAACAACTGATGATTGC	59.562	21	AGAACCTTTTCCTGTGACGC	59.333	20	222	214	435	ATCCACAACAACTGATGATTGC	59.866	22	AGAACCTTTTCCTGTGACGC	59.333	20	223	213	435	TCCACAACAACTGATGATTGC	59.562	21	AAGAACCTTTTCCTGTGACGC	60.655	21	223	214	436
TR50605_c0_g1	GCAGTCCGACCAATCGTAAG	60.657	20	TAGGCTATTTGGGGCCTCTT	60.055	20	270	574	843	GCAGTCCGACCAATCGTAAG	60.657	20	TTAGGCTATTTGGGGCCTCT	60.055	20	271	574	844	GCAGTCCGACCAATCGTAAG	60.657	20	TTTTAGGCTATTTGGGGCCT	59.93	20	273	574	846
TR7152_c0_g1	GTCTGCTGCAGTGAGGTTGA	60.187	20	TACCAGTGTGCAGAAGGACG	59.897	20	273	1445	1717	GTCTGCTGCAGTGAGGTTGA	60.187	20	CACTCCTTTGGAACAGGTGG	60.536	20	122	1445	1566	AGCGAGACATGGAAAGATGG	60.218	20	CACTCCTTTGGAACAGGTGG	60.536	20	260	1307	1566
TR1739_c0_g1	TGCAAGAAACAAGGGTATTGG	59.982	21	TTGCTACTATCACAGAAAGCTTGG	59.972	24	260	1414	1673	CAAGAAACAAGGGTATTGGCA	59.982	21	TTGCTACTATCACAGAAAGCTTGG	59.972	24	258	1416	1673	TGCAAGAAACAAGGGTATTGG	59.982	21	TGCTACTATCACAGAAAGCTTGG	58.734	23	259	1414	1672
TR13882_c0_g1	TCATGGCATGTGAGTGAGTG	59.213	20	ACCCAGCAACCAGTTCTCC	60.104	19	224	463	686	TCATGGCATGTGAGTGAGTGT	60.179	21	AATAAATCCACTCCACCACCC	59.933	21	241	463	703	TCATGGCATGTGAGTGAGTGT	60.179	21	ACCCAGCAACCAGTTCTCC	60.104	19	224	463	686
TR38221_c1_g1	ATCTGGATGACTCGGACTCG	60.223	20	GACCTGCCTTTGCAGACTTC	59.997	20	231	4360	4590	ATCTGGATGACTCGGACTCG	60.223	20	GTGAGATCGCTACTGGCTCC	59.981	20	273	4360	4632	ATCTGGATGACTCGGACTCG	60.223	20	CCTGCCTTTGCAGACTTCTT	59.615	20	229	4360	4588
TR51342_c0_g1	TCAAGGGGACGTAGAGCAAT	59.694	20	CGAAAGCTGACCAATGAACA	59.84	20	215	1017	1231	TCAAGGGGACGTAGAGCAAT	59.694	20	TGCTACATGGGTTGATCCAG	59.522	20	147	1017	1163	CAAGGGGACGTAGAGCAATG	60.647	20	CGAAAGCTGACCAATGAACA	59.84	20	214	1018	1231
TR23707_c0_g1	GCGGACATCCCAATCACTTA	60.864	20	ATCCTAACGTCAGACCCACG	59.989	20	147	151	297	GCGGACATCCCAATCACTTA	60.864	20	TCTTTGACAAGCTCGGTGTG	60.025	20	271	151	421	GCGGACATCCCAATCACTTA	60.864	20	CTTTGACAAGCTCGGTGTGA	60.025	20	270	151	420
TR23707_c0_g1	GACGCCACTAGTGCTGAACA	60.056	20	CGAATGATCGAGGTTAACAGG	59.578	21	242	1214	1455	CAAGCCTGGATACGGGAGTA	60.088	20	CGAATGATCGAGGTTAACAGG	59.578	21	172	1284	1455	CCGCTAAGCCTAGCTTGATG	60.131	20	CGAATGATCGAGGTTAACAGG	59.578	21	192	1264	1455
TR23929_c5_g3	GGTTTAACACCCTGAGGCAA	59.971	20	ACGGTTTTATGGCGATTGTG	60.752	20	248	1942	2189	CGAAACATCACCGTTTCCTT	59.971	20	ACGGTTTTATGGCGATTGTG	60.752	20	223	1967	2189	TTGGTTTAACACCCTGAGGC	59.971	20	ACGGTTTTATGGCGATTGTG	60.752	20	250	1940	2189
TR3299_c6_g3	TGCAAAAGCCAGCTCAATAA	59.585	20	AACTTGCGTGTGGTCTGACA	60.357	20	279	1235	1513	TTGCAAAAGCCAGCTCAATA	59.585	20	AACTTGCGTGTGGTCTGACA	60.357	20	280	1234	1513	GTTGCAAAAGCCAGCTCAAT	60.395	20	AGGACCATTGTGTTTTGCGT	60.419	20	178	1233	1410
TR40339_c0_g1	ATCCATTGACCCAGTATCGG	59.629	20	GCAATCAACATCCCTGACCT	59.934	20	212	4276	4487	ATCCATTGACCCAGTATCGG	59.629	20	AGCAATCAACATCCCTGACC	59.934	20	213	4276	4488	GGGAGGAAGGGGACATAATC	59.588	20	AGCAATCAACATCCCTGACC	59.934	20	239	4250	4488
TR31985_c3_g3	AACCGATCTTTGAGGGGAGT	59.935	20	TGCTTGCGCAGAAACATAAC	60.021	20	203	910	1112	ATGTGGAAAATCTGGCTTGC	60.081	20	TGCTTGCGCAGAAACATAAC	60.021	20	242	871	1112	AACCGATCTTTGAGGGGAGT	59.935	20	ACTGATCACTTTGGCAAGGG	60.111	20	185	910	1094
TR23769_c6_g1	TGCTTCGATTCAATGACACC	59.654	20	TCCACCAATGTACTGGCTCA	60.112	20	212	1502	1713	TGCTTCGATTCAATGACACC	59.654	20	AAGACCCTGATCCACCAATG	59.779	20	222	1502	1723	TGCTTCGATTCAATGACACC	59.654	20	TGATCCACCAATGTACTGGC	59.374	20	215	1502	1716
TR35349_c3_g1	GGAAATGCCGTAAAACAACG	60.356	20	TCTGGCCATCCAGAGTTTTT	59.67	20	249	7	255	GGAAATGCCGTAAAACAACG	60.356	20	TTCTGGCCATCCAGAGTTTT	59.67	20	250	7	256	CGTAAATGGAAATGCCGTAAA	59.848	21	TGTTGTTGTTGTTAGCCCCA	60.004	20	169	0	168
TR52001_c0_g2	CGACCAGGTTCACAGCAATA	59.716	20	TTTTCCTTTCTTTCTTCTTGTCTCTC	59.945	26	277	1263	1539	CGACCAGGTTCACAGCAATA	59.716	20	TTTCCTTTCTTTCTTCTTGTCTCTC	58.805	25	276	1263	1538	CGACCAGGTTCACAGCAATA	59.716	20	TTTTTCCTTTCTTTCTTCTTGTCTC	58.722	25	278	1263	1540
TR41239_c0_g1	AGTGGTTAAAGCAGAGGCCA	59.875	20	GCTGCATGGAACTCTGATGA	59.95	20	275	401	675	TGGTTAAAGCAGAGGCCATT	59.708	20	GCTGCATGGAACTCTGATGA	59.95	20	273	403	675	TGGTTAAAGCAGAGGCCATTA	59.728	21	GCTGCATGGAACTCTGATGA	59.95	20	273	403	675
TR7324_c0_g1	CCAACTGGTCGTCTCCATTT	59.966	20	GTCATCGTTGTTGTCGCATC	60.128	20	206	1761	1966	ATATCCCCATCTGCCAACTG	59.773	20	GTCATCGTTGTTGTCGCATC	60.128	20	219	1748	1966	TGCGACTAGGCTGACTTGAA	59.74	20	GTCATCGTTGTTGTCGCATC	60.128	20	103	1864	1966
TR39254_c1_g1	TGTCCGCTCTGTTATGTTCG	59.864	20	GTCAAAATGTGGCATGGCTA	59.548	20	208	2329	2536	TGTCCGCTCTGTTATGTTCG	59.864	20	TCAGTCAAAATGTGGCATGG	60.517	20	211	2329	2539	CTCATTGAGAATGAACGGCA	59.799	20	GTCAAAATGTGGCATGGCTA	59.548	20	157	2380	2536
TR33224_c0_g1	TCCTTTGTGCCAGTTAACACC	60.023	21	CCATGTACAGGTATTGGGCA	59.272	20	144	69	212	TCCTTTGTGCCAGTTAACACC	60.023	21	TTCCATGTACAGGTATTGGGC	59.699	21	146	69	214	CCTTTGTGCCAGTTAACACC	58.132	20	CCATGTACAGGTATTGGGCA	59.272	20	143	70	212
TR24705_c0_g1	TGGTTCGAGGTGTGATTCAA	60.088	20	CGTTCTGACGATGACTTAAACAG	58.961	23	277	1340	1616	TGGTTCGAGGTGTGATTCAA	60.088	20	CGTTCTGACGATGACTTAAACA	57.961	22	277	1340	1616	TGGTTCGAGGTGTGATTCAA	60.088	20	AACGTTCTGACGATGACTTAAACA	60.095	24	279	1340	1618
TR9568_c1_g1	ATGGATGTAACAAGCGGTCC	59.82	20	TTAACAGCATTCTGGTCCGA	59.272	20	163	906	1068	ACGTTTTTGTGATGGACGGT	60.277	20	TTAACAGCATTCTGGTCCGA	59.272	20	186	883	1068	TAACAAGCGGTCCCTAGAGC	59.476	20	TTAACAGCATTCTGGTCCGA	59.272	20	156	913	1068
TR7324_c3_g3	AGGAATGGCGTAAGGTGATG	59.955	20	TCGAGCCCTTATTGGTCAAC	60.074	20	280	1550	1829	GGAATGGCGTAAGGTGATGT	59.82	20	TCGAGCCCTTATTGGTCAAC	60.074	20	279	1551	1829	AGGTGATGTTGTCTGTCCCC	59.817	20	TCGAGCCCTTATTGGTCAAC	60.074	20	268	1562	1829
TR35781_c0_g1	CCAGCGGAAAAGTTCCAATA	60.067	20	TAATCTCACCCTGGTCTGGC	60.073	20	183	373	555	AGGAAGTCATAGGGTCCGCT	60.096	20	TAATCTCACCCTGGTCTGGC	60.073	20	222	334	555	CCAGCGGAAAAGTTCCAATA	60.067	20	GCATGATAACAGCACCAACG	60.142	20	270	373	642
TR25214_c1_g1	CACAGATTCCAGGCTTGTCA	59.831	20	AGGCATCGCGAAATCTAATG	60.196	20	166	314	479	CACAGATTCCAGGCTTGTCA	59.831	20	TCCGGTATCATATTCTGGGC	59.745	20	195	314	508	CACAGATTCCAGGCTTGTCA	59.831	20	ACCACAGCAATAATGCCAAA	59.041	20	144	314	457
TR25187_c2_g1	AGCGGAGGTTCTAACCCATT	59.962	20	GGATTACCCATGTTGCTGCT	59.962	20	263	773	1035	AGCGGAGGTTCTAACCCATT	59.962	20	GCTGGATTACCCATGTTGCT	59.962	20	266	773	1038	AGCGGAGGTTCTAACCCATT	59.962	20	AGCTGGATTACCCATGTTGC	59.962	20	267	773	1039
TR9928_c0_g1	TGAACTGTTTTTGAATGCACG	59.761	21	GAAATAGCCAAAAGCGACCA	60.209	20	212	66	277	TATTTTTCATGCAACTCGGG	58.625	20	GAAATAGCCAAAAGCGACCA	60.209	20	273	5	277	AAACCGACAGTCGCCAAAT	60.511	19	GAAATAGCCAAAAGCGACCA	60.209	20	176	102	277
TR9375_c1_g1	TAAGAAATGCCCCACTCAGC	60.214	20	TGCTCAGCATTTTCTTCATAGC	59.636	22	189	196	384	ACAGTTTTACCTGCCCCACC	61.161	20	AGCAGCTTCATTCTAAGGGG	58.554	20	269	280	548	ACAGTTTTACCTGCCCCACC	61.161	20	GCAGCTTCATTCTAAGGGGT	58.411	20	268	280	547
TR9375_c1_g1	TGTAGGGATTTCACCAGCAA	59.123	20	TGACATCATCACCACAGAAACA	60.008	22	264	688	951	TGTAGGGATTTCACCAGCAA	59.123	20	TCATGACATCATCACCACAGAA	59.967	22	267	688	954	TCATGTAGGGATTTCACCAGC	59.947	21	TGACATCATCACCACAGAAACA	60.008	22	267	685	951
TR4342_c0_g1	CAGGAAAGCATTTTCACCAAA	60.096	21	CAAACCTGTGTGATCAACAACC	60.312	22	262	1179	1440	TAATGCACGTGACCCGTAGA	60.134	20	TCCTGTGTACAAGAGGTTGTGAA	59.688	23	172	1103	1274	CAGGAAAGCATTTTCACCAA	58.745	20	CAAACCTGTGTGATCAACAACC	60.312	22	262	1179	1440
TR35322_c0_g1	TTTTGGAAGTTTAGATCACGCT	58.077	22	CCGACCAGCTGTATGAAGTC	58.315	20	280	495	774	TTTTGGAAGTTTAGATCACGC	57.064	21	CCGACCAGCTGTATGAAGTC	58.315	20	280	495	774	TGCGACATTTGTTTCCAAAA	60.088	20	TGACCAAGATCTGGTGTACTACATT	59.015	25	270	320	589
TR10146_c0_g1	CAACACAGAAATGCCTGCTT	58.926	20	TGAGTTTGTCATGCCCTTCA	60.24	20	249	47	295	CAACACAGAAATGCCTGCTT	58.926	20	AAACTTGTCCCAGGCTTTCA	59.711	20	230	47	276	CAACACAGAAATGCCTGCTT	58.926	20	TTCAAACTTGTCCCAGGCTT	59.711	20	233	47	279
TR30499_c0_g1	AAAGATTTCGCGAGGAACAA	59.823	20	CACGGAAATGTTACAGCCAA	59.585	20	233	251	483	AAAGATTTCGCGAGGAACAA	59.823	20	TGAATGCCAACTCATCAACC	59.502	20	255	251	505	GAAAGATTTCGCGAGGAACA	60.331	20	TGAATGCCAACTCATCAACC	59.502	20	256	250	505
TR30134_c1_g1	ATGAAATGGACCTGATTGGC	59.756	20	GATGGCACTGAAGCACAAAA	59.847	20	255	2229	2483	ATGAAATGGACCTGATTGGC	59.756	20	ATGCCTGCAGGATTAGGAAA	59.668	20	219	2229	2447	ATGAAATGGACCTGATTGGC	59.756	20	TGCCTGCAGGATTAGGAAAT	59.668	20	218	2229	2446
TR36161_c0_g1	GGCCCTTAACACCAGTGAAA	59.971	20	GAATCAAGTGTTCGGGGAAA	59.91	20	198	87	284	GGCCCTTAACACCAGTGAAA	59.971	20	AGCTGAATCAAGTGTTCGGG	60.255	20	202	87	288	GGCCCTTAACACCAGTGAAA	59.971	20	TTCAATGCAGGAAAGCTGAA	59.542	20	215	87	301
TR29860_c0_g1	ATAACGCACTTCGCTCCATC	60.243	20	GTTGCCCGGTTGAAATTAGA	59.938	20	182	2130	2311	ATAACGCACTTCGCTCCATC	60.243	20	TTGCCCGGTTGAAATTAGAG	60.067	20	181	2130	2310	ACTTCGCTCCATCAAACAGG	60.255	20	GTTGCCCGGTTGAAATTAGA	59.938	20	175	2137	2311
TR45316_c0_g1	TGAAAATGATGCTGCCTACG	59.833	20	ATTTGTTGCAGCTTCCTGCT	60.022	20	130	1198	1327	TGAAAATGATGCTGCCTACG	59.833	20	AGGAGCATTTGTTGCAGCTT	60.022	20	136	1198	1333	TGAAAATGATGCTGCCTACG	59.833	20	GAGCATTTGTTGCAGCTTCC	60.925	20	134	1198	1331
TR26664_c0_g1	CAAAGGGGTTCTAGGTGGGT	60.218	20	GGAAAGGAAGGGTAACTCGG	59.934	20	249	261	509	ACAAAGGGGTTCTAGGTGGG	60.218	20	GGAAAGGAAGGGTAACTCGG	59.934	20	250	260	509	ACAAAGGGGTTCTAGGTGGG	60.218	20	GGGAAAGGAAGGGTAACTCG	59.934	20	251	260	510
TR7451_c0_g1	CACATTGTTTAGGTGTGCATGA	59.512	22	TGCGTTACAAATCAATCACAATC	59.888	23	280	2039	2318	TGTGCATGAGAATAACATTTTCG	60.013	23	TGCGTTACAAATCAATCACAATC	59.888	23	267	2052	2318	CATTGTTTAGGTGTGCATGAGAA	60.046	23	TGCGTTACAAATCAATCACAATC	59.888	23	278	2041	2318
TR17190_c0_g1	AGTAGTTTGGCACCAATCCG	59.993	20	GAATTTAACAGATCCTTTGGATGG	60.076	24	188	810	997	AGTAGTTTGGCACCAATCCG	59.993	20	AATTTAACAGATCCTTTGGATGG	58.448	23	187	810	996	AGTAGTTTGGCACCAATCCG	59.993	20	TGAATTTAACAGATCCTTTGGATG	59.395	24	189	810	998
TR46999_c1_g1	GAGACGGAATTCCAAACGAA	60.051	20	CCCCATCATCGTCTTCATCT	59.886	20	159	11	169	GAGACGGAATTCCAAACGAA	60.051	20	ACCGTCGGTATCCCTTTCTT	59.827	20	197	11	207	GATGGAGACGGAATTCCAAA	59.871	20	CCCCATCATCGTCTTCATCT	59.886	20	163	7	169
TR38268_c0_g1	CAACAATGGACAGTGAAGCG	60.301	20	CGACTATTCGCAACATAAGCC	59.756	21	156	488	643	AACAATGGACAGTGAAGCGA	59.293	20	CGACTATTCGCAACATAAGCC	59.756	21	155	489	643	TCGACAGATCAACAATGGACA	60.104	21	CGACTATTCGCAACATAAGCC	59.756	21	165	479	643
TR16403_c4_g1	CAGGCAAATATAGGTGGTGGA	59.831	21	ATCGACGTGGACTCTGGTTT	59.579	20	276	728	1003	CAGGCAAATATAGGTGGTGGA	59.831	21	CATTCGGAGAGACAGCTCCT	59.555	20	252	728	979	CAGGCAAATATAGGTGGTGGA	59.831	21	TCCATTCGGAGAGACAGCTC	60.497	20	254	728	981
TR30138_c11_g1	TAGGGCATCTGCATGACTTG	59.823	20	AGGGGCGTAGCTTCCTTTAG	59.871	20	243	1496	1738	AAACGTTGCTAGGGCATCTG	60.27	20	AGGGGCGTAGCTTCCTTTAG	59.871	20	252	1487	1738	GCTAGGGCATCTGCATGACT	60.393	20	AGGGGCGTAGCTTCCTTTAG	59.871	20	245	1494	1738
TR55234_c0_g1	GATCATCGATCCATATCGCC	60.232	20	TTAAACCTTGTCCGCTTTGC	60.244	20	276	533	808	ATGACGGTCTAAGTGGTGGG	59.844	20	CACGATCCCTTCGCTCTAGT	59.454	20	205	509	713	ATGACGGTCTAAGTGGTGGG	59.844	20	ACCGAGCAATACACATGCCT	60.547	20	275	509	783
TR32235_c6_g12	TCACATGTTCATAAAGGCCA	57.542	20	AGACAGCATTGATGTGCTGG	59.862	20	214	1247	1460	TCACATGTTCATAAAGGCCA	57.542	20	GTGCTGGCTGATTTGGATCT	60.226	20	201	1247	1447	TCACATGTTCATAAAGGCCA	57.542	20	TTGGATCTACACTGGTCGCA	60.263	20	189	1247	1435
TR41371_c0_g1	GGGGAAAGGTTCACCAAAGT	60.204	20	TTTGGTTTTGCACTTTGAATTTT	59.911	23	142	871	1012	GGGGAAAGGTTCACCAAAGT	60.204	20	TTTTGGTTTTGCACTTTGAATTT	59.911	23	143	871	1013	GGGGAAAGGTTCACCAAAGT	60.204	20	TTGGTTTTGCACTTTGAATTTT	58.698	22	141	871	1011
TR23937_c2_g1	AAAATCCCAAACATCGAGTGA	59.42	21	TCACTTTGGCTTCGTCACAA	60.427	20	280	765	1044	AAATCCCAAACATCGAGTGA	57.991	20	CTCACTTTGGCTTCGTCACA	60.025	20	280	766	1045	AAATCCCAAACATCGAGTGA	57.991	20	TCACTTTGGCTTCGTCACAA	60.427	20	279	766	1044
TR23937_c2_g1	CGGACTCGAAAGCATTTTCT	59.452	20	AACGGATCTCTCGTCTGCAT	59.834	20	249	3899	4147	CGGACTCGAAAGCATTTTCT	59.452	20	ACGGATCTCTCGTCTGCATC	60.381	20	248	3899	4146	CGGACTCGAAAGCATTTTCT	59.452	20	CGGATCTCTCGTCTGCATCT	60.52	20	247	3899	4145
TR4320_c0_g2	CATGTTTTCAATGCAGCACC	60.119	20	CAGCGTTGTTGATTTAGGCA	59.872	20	243	2306	2548	ATGCAGCACCCGAAAACTAA	60.637	20	CAGCGTTGTTGATTTAGGCA	59.872	20	233	2316	2548	AATGCAGCACCCGAAAACTA	60.637	20	CAGCGTTGTTGATTTAGGCA	59.872	20	234	2315	2548
TR50119_c0_g1	AGCAGCTTCCAGTCATCCAT	59.834	20	CACAAAACGTGTGTTGAGCC	60.199	20	190	473	662	GCAGCTTCCAGTCATCCATT	60.226	20	CACAAAACGTGTGTTGAGCC	60.199	20	189	474	662	AGCAGCTTCCAGTCATCCAT	59.834	20	AAACAATCCAAGGGTGCAGA	60.495	20	215	473	687
TR20168_c0_g1	AATGGTTTGAATGGGGCATA	60.016	20	CAGTTGGGCTGTAATCAGCA	59.864	20	202	1402	1603	AATGGTTTGAATGGGGCATA	60.016	20	TGGACACAGTTGGGCTGTAA	60.152	20	208	1402	1609	TTGAATGGGGCATACAGGAT	60.155	20	CAGTTGGGCTGTAATCAGCA	59.864	20	196	1408	1603
TR39430_c0_g1	TTGAATTCTTTGCCCCAGAG	60.184	20	GCTTTAGCCGCAGATTCCTT	60.84	20	255	2973	3227	TTCTTTGCCCCAGAGTTTTG	60.22	20	GCTTTAGCCGCAGATTCCTT	60.84	20	250	2978	3227	TTGAATTCTTTGCCCCAGAG	60.184	20	CTTTAGCCGCAGATTCCTTC	59.067	20	254	2973	3226
TR28926_c0_g1	CCTGGCGATACTGAGGATTC	59.653	20	TAATGCCCAATGTCTTGCTG	59.688	20	270	523	792	TCCTGGCGATACTGAGGATT	59.653	20	TAATGCCCAATGTCTTGCTG	59.688	20	271	522	792	TCCTGGCGATACTGAGGATT	59.653	20	CCCAATGTCTTGCTGATGAA	59.648	20	266	522	787
TR29467_c2_g1	CATCCAAGAAACGGCAACTT	60.11	20	ATTGCATGTGCAACCAGTGT	60.04	20	265	221	485	TCAACGTTTTCACCATCCAA	59.941	20	CTGGTTTCTGGTTGCTGCTT	60.431	20	227	208	434	CATCCAAGAAACGGCAACTT	60.11	20	CATGTGCAACCAGTGTGGAT	60.45	20	261	221	481
TR35285_c0_g1	ATGTTAAGGGCAGGCATCAG	60.096	20	ACCACCCAGTTACATCGCTC	59.997	20	100	3365	3464	GAATGTTAAGGGCAGGCATC	59.533	20	ACCACCCAGTTACATCGCTC	59.997	20	102	3363	3464	AATGTTAAGGGCAGGCATCA	60.469	20	ACCACCCAGTTACATCGCTC	59.997	20	101	3364	3464
TR51378_c0_g1	CGCCTGAAAACTTTTACCCA	60.103	20	CTCGACCGAGTCTGTGGTTT	60.298	20	149	161	309	GCCTGTTCATCGGCAGTAAT	60.103	20	CTCGACCGAGTCTGTGGTTT	60.298	20	224	86	309	CGCCTGAAAACTTTTACCCA	60.103	20	GTCTCGACCGAGTCTGTGGT	60.315	20	151	161	311
TR45886_c0_g1	TCTCAAGCAATGGACATGGA	60.201	20	TTTTCCACACCCTCTTCCAC	59.943	20	251	23	273	AAACTGTCCTGAAACGTCGC	60.299	20	TTTTCCACACCCTCTTCCAC	59.943	20	274	0	273	AAACTGTCCTGAAACGTCGC	60.299	20	TCCACACCCTCTTCCACTTC	60.088	20	271	0	270
TR55628_c0_g1	GTCCACGTGTTTGTGGTGTC	59.897	20	GCAAGTAATGACGCATGGAA	59.694	20	118	1506	1623	GTGGTGTCCTGCTGGTTTCT	60.159	20	GCAAGTAATGACGCATGGAA	59.694	20	106	1518	1623	GTCCACGTGTTTGTGGTGTC	59.897	20	TCCTGTGGAAGAGAAAACGC	60.375	20	140	1506	1645
TR35346_c0_g11	TTACAAACTTCGCTACCGGG	60.124	20	TGGATGGACAGACAATGTGG	60.378	20	194	188	381	TTACAAACTTCGCTACCGGG	60.124	20	GATGGACAGACAATGTGGCTT	59.989	21	192	188	379	TTTCCGAACACAGCTTCTTG	59.047	20	TAGCGATCCAAATGTTGCAC	59.694	20	273	219	491
TR40725_c0_g1	TCAACCTTACCAAGGGTTCG	59.964	20	TAAAGGATGTTCCAGACGGG	59.926	20	256	668	923	CCTTACCAAGGGTTCGGAGT	60.353	20	TAAAGGATGTTCCAGACGGG	59.926	20	252	672	923	ACCTTACCAAGGGTTCGGAG	60.353	20	TAAAGGATGTTCCAGACGGG	59.926	20	253	671	923
TR48625_c1_g2	AGGACAGCTTTTGAGGGTCA	59.844	20	ATTTATTACGGCGGATGACG	59.816	20	240	572	811	AGGACAGCTTTTGAGGGTCA	59.844	20	TTCCGAGTACGAGGACCAAG	60.246	20	215	572	786	AGGACAGCTTTTGAGGGTCA	59.844	20	CTTCCGAGTACGAGGACCAA	60.246	20	216	572	787
TR26209_c1_g2	GTGTGTCGGCCGTAAAAAGT	60.037	20	CAGAAACGTCCGCTTAGGTC	59.875	20	223	59	281	GTGTGTCGGCCGTAAAAAGT	60.037	20	TCAGAAACGTCCGCTTAGGT	59.875	20	224	59	282	GCGCTATTTGTGCAGTGTGT	59.942	20	CAGAAACGTCCGCTTAGGTC	59.875	20	237	45	281
TR57348_c0_g1	TTGCTGCTTTCTTCAATCACA	59.6	21	CGCGACTCTCCGAATAGACT	59.598	20	211	778	988	TTGCTGCTTTCTTCAATCACA	59.6	21	GTCGCGACTCTCCGAATAGA	60.504	20	213	778	990	TGCTGCTTTCTTCAATCACA	58.129	20	CGCGACTCTCCGAATAGACT	59.598	20	210	779	988
TR43442_c0_g1	CATCGGACAATCTCGGACTT	60.073	20	CCTGAGGCAAATATCCCAAA	59.894	20	206	134	339	AGTTGCCATCGGACAATCTC	60.081	20	CCTGAGGCAAATATCCCAAA	59.894	20	212	128	339	TGTTTAGTTGCCATCGGACA	60.111	20	CCTGAGGCAAATATCCCAAA	59.894	20	217	123	339
TR31983_c1_g13	ACATGACAAATTCGCACAGG	59.572	20	CTGCTGGAGACTTGGACCTC	59.986	20	119	37	155	ACATGACAAATTCGCACAGG	59.572	20	TGCTGGAGACTTGGACCTCT	59.986	20	118	37	154	ACATGACAAATTCGCACAGG	59.572	20	TCTGCTGGAGACTTGGACCT	59.986	20	120	37	156
TR30141_c0_g1	TCCCACAGTCGTCATATTGTG	59.43	21	TTTCTGAAATGCATTGGTGC	59.67	20	209	286	494	TCCCACAGTCGTCATATTGTG	59.43	21	TTCTGAAATGCATTGGTGCT	59.276	20	208	286	493	TCCCACAGTCGTCATATTGTG	59.43	21	TCTGAAATGCATTGGTGCTT	59.276	20	207	286	492
TR30141_c0_g1	AAGCACCAATGCATTTCAGA	59.276	20	AGAGAATCTGACTCGGCAGG	59.555	20	203	473	675	CACAAGCTTTTCGGAGAACA	59.047	20	AGAGAATCTGACTCGGCAGG	59.555	20	107	569	675	AAGCACCAATGCATTTCAGA	59.276	20	ACTCGGCAGGTATCAGCAAA	60.796	20	193	473	665
TR26038_c1_g1	TTTCAATGATGCCATTGTCC	59.33	20	TTCTTTTCAAGCTCCTGACGA	60.118	21	108	232	339	TTTCAATGATGCCATTGTCC	59.33	20	TCTTTTCAAGCTCCTGACGA	58.722	20	107	232	338	TTTCAATGATGCCATTGTCC	59.33	20	TCTTTTCAAGCTCCTGACGAC	59.607	21	107	232	338
TR51786_c3_g5	TCCAAGCTGCTTTTTGTGTG	60.027	20	CAGAAAACCGTACCGGACAT	59.853	20	242	1098	1339	AGCTGCTTTTTGTGTGGCTT	60.059	20	CAGAAAACCGTACCGGACAT	59.853	20	238	1102	1339	AAGCTGCTTTTTGTGTGGCT	60.059	20	CAGAAAACCGTACCGGACAT	59.853	20	239	1101	1339
TR11241_c1_g1	CTCAATGAGTTCATTCCATCCA	59.933	22	CTTGATGAACGCAGGAGTGA	59.984	20	247	34	280	TCAATGAGTTCATTCCATCCA	58.912	21	CTTGATGAACGCAGGAGTGA	59.984	20	246	35	280	TCAATGAGTTCATTCCATCCAA	60.309	22	CTTGATGAACGCAGGAGTGA	59.984	20	246	35	280
TR25901_c0_g1	TGCAATGACTGTGTTTATGTGG	59.512	22	ACACTCGACCACTTCCCAAC	60.009	20	210	1	210	TGCAATGACTGTGTTTATGTGG	59.512	22	CATCTTTCTCCTTGGATCGC	59.773	20	173	1	173	TGCAATGACTGTGTTTATGTGG	59.512	22	TCTTTCTCCTTGGATCGCAC	60.34	20	171	1	171
TR44721_c0_g1	CTGGGTATTTGCGTTGTGTG	60.027	20	GGAACGTTATGGAGTCCGAA	59.933	20	238	817	1054	TGGGTATTTGCGTTGTGTGT	59.888	20	GGAACGTTATGGAGTCCGAA	59.933	20	237	818	1054	TAGCATTCCTTCCTGTGCCT	59.836	20	GGAACGTTATGGAGTCCGAA	59.933	20	121	934	1054
TR50769_c1_g1	CTGAAACCTCGGCTAAATGG	59.702	20	ACGTACAATCGCATCCATGA	59.955	20	257	1236	1492	CTGAAACCTCGGCTAAATGG	59.702	20	CTGCATCGATGATGCGTAGT	59.854	20	188	1236	1423	TGAAACCTCGGCTAAATGGT	59.569	20	ACGTACAATCGCATCCATGA	59.955	20	256	1237	1492
TR36264_c0_g1	TTGACTTATTGGAAAGTGGCAA	59.625	22	TTGAAACGGAAATTGGATCA	58.94	20	157	1322	1478	TTGACTTATTGGAAAGTGGCAA	59.625	22	CTGGGAAGTCATGTGGAATG	58.93	20	100	1322	1421	TTGACTTATTGGAAAGTGGCAA	59.625	22	CTTGAAACGGAAATTGGATCA	59.924	21	158	1322	1479
TR36264_c0_g1	CAATGGCTAAATGGAAATTGG	59.309	21	AAAAAGGGGCAGGTCGAAT	60.812	19	269	1777	2045	TGGCTAAATGGAAATTGGAA	58.082	20	AAAAAGGGGCAGGTCGAAT	60.812	19	266	1780	2045	ACAATGGCTAAATGGAAATTGG	60.076	22	AAAAAGGGGCAGGTCGAAT	60.812	19	270	1776	2045
TR38481_c0_g1	CGGGTTTTGCTGTAACCCTA	59.99	20	TGAGAATGGAGACCAAACACA	59.124	21	187	1230	1416	CGGGTTTTGCTGTAACCCTA	59.99	20	CTGAGAATGGAGACCAAACACA	60.149	22	188	1230	1417	AGCCCAAGGATGACTGAAAA	59.67	20	TGAGAATGGAGACCAAACACA	59.124	21	235	1182	1416
TR55346_c1_g1	CAGTCGAAGACTCTCCCCAG	59.978	20	AGCATGCTCCCTGAAATGAT	59.658	20	220	1755	1974	TTCGGGTAATCGAACGAGAC	60.074	20	AGCATGCTCCCTGAAATGAT	59.658	20	195	1780	1974	TTCCAAGTCGCATAAATCCC	59.901	20	AGCATGCTCCCTGAAATGAT	59.658	20	249	1726	1974
TR27950_c1_g1	TGAGATCATTGTCTGGAAGTGAG	59.343	23	TTTCCGATTAAACAAGGCAAA	59.59	21	272	566	837	GGAAGTGAGTTTTCATTTCTTGC	59.299	23	TTTCCGATTAAACAAGGCAAA	59.59	21	258	580	837	CATTGTCTGGAAGTGAGTTTTCA	59.272	23	TTTCCGATTAAACAAGGCAAA	59.59	21	266	572	837
TR54131_c0_g1	AGAAAGTGGGCACCATCAAT	59.41	20	ACGAGGCAGTGGAAGCTAAA	60.015	20	258	133	390	AGAAAGTGGGCACCATCAAT	59.41	20	CAGTGGAAGCTAAAGCCGAG	60.147	20	252	133	384	AGAAAGTGGGCACCATCAAT	59.41	20	CGAGGCAGTGGAAGCTAAAG	60.147	20	257	133	389
TR36214_c0_g2	CTCGGCAAAGTGAACAACAA	59.881	20	CGAAGCTTTTAGTGGTGCAA	59.108	20	151	141	291	CTCGGCAAAGTGAACAACAA	59.881	20	ACGAAGCTTTTAGTGGTGCAA	59.934	21	152	141	292	AGCTCGGCAAAGTGAACAAC	60.44	20	CGAAGCTTTTAGTGGTGCAA	59.108	20	153	139	291
TR9020_c4_g2	TTGTGCAAGCAAACAGGAAG	60.027	20	TGCTCTCCATAGACGGTTTACA	59.769	22	185	3404	3588	TTGTGCAAGCAAACAGGAAG	60.027	20	AAGAATTGCTCTCCATAGACGG	59.747	22	191	3404	3594	GTTGTGCAAGCAAACAGGAA	59.888	20	TGCTCTCCATAGACGGTTTACA	59.769	22	186	3403	3588
TR8196_c0_g1	CGTGGACTCACAGCCAGATA	59.855	20	GCCGTGGAATATCTTATACCTCA	59.39	23	242	1255	1496	AACCAAATGACACACGTGGA	59.855	20	GCCGTGGAATATCTTATACCTCA	59.39	23	256	1241	1496	TGCCACACATACGACCATTT	59.847	20	GCCGTGGAATATCTTATACCTCA	59.39	23	220	1277	1496
TR8328_c2_g1	GGTCTGGCATTAAACTCGGA	60.074	20	CTTCAAGGTCACGGTCACTG	59.305	20	183	847	1029	CTTTGAACAGGGTCTGGCAT	60.111	20	CTTCAAGGTCACGGTCACTG	59.305	20	193	837	1029	CATGCCTTTGAACAGGGTCT	60.111	20	CTTCAAGGTCACGGTCACTG	59.305	20	198	832	1029
TR46936_c0_g1	TTTGTTTGATTTCCTGCCAA	59.133	20	CAAGCACATCTGTGCCATCT	59.862	20	277	766	1042	TGTTTGATTTCCTGCCAAAA	59.133	20	CAAGCACATCTGTGCCATCT	59.862	20	275	768	1042	TTGTTTGATTTCCTGCCAAA	59.133	20	CAAGCACATCTGTGCCATCT	59.862	20	276	767	1042
TR55245_c0_g2	TGAGGAACGAAATACGCAGA	59.42	20	TCTGTCTCAAAGTGCAAGCG	60.324	20	258	874	1131	TGAGGAACGAAATACGCAGA	59.42	20	TGTCTCAAAGTGCAAGCGTT	59.64	20	256	874	1129	TGAGGAACGAAATACGCAGA	59.42	20	CAAAGTGCAAGCGTTTTGTC	59.512	20	251	874	1124
TR31988_c0_g1	TGCTCCACCACCTTAACACA	60.152	20	TGAACGCAGAGTTAGTGAAAACA	59.97	23	160	322	481	CCACCACCTTAACACAACCA	59.309	20	TGAACGCAGAGTTAGTGAAAACA	59.97	23	156	326	481	TGCTCCACCACCTTAACACA	60.152	20	TCTGAACGCAGAGTTAGTGAAAA	59.21	23	162	322	483
TR40669_c0_g3	TGAAATACAGGTGTGCCAGG	59.566	20	CCTTGACAATTTGATTTTGCC	59.442	21	270	148	417	GGTGTGCCAGGTAATCTCCA	60.924	20	CCTTGACAATTTGATTTTGCC	59.442	21	261	157	417	TACTCTGTTTGCCCACACCC	60.954	20	CCTTGACAATTTGATTTTGCC	59.442	21	239	179	417
TR7296_c0_g2	TCCGAACCCTATACTGGTGG	59.807	20	TGCCTCATAGGTGATTCCAA	59.075	20	212	722	933	TCCGAACCCTATACTGGTGG	59.807	20	TTGCCTCATAGGTGATTCCA	59.075	20	213	722	934	CAGCCATATTGCACCTGATG	60.096	20	AATCAATCATTCCGACACAGC	59.954	21	261	584	844
TR17306_c2_g1	GTCACTCCGTCTGTCCGTTT	60.159	20	GCTCACGTCAGAAGAGACCC	59.993	20	190	2127	2316	GTCACTCCGTCTGTCCGTTT	60.159	20	GCTCTGGCTCCAAAGATCAC	59.957	20	252	2127	2378	CGTCAATGTCACTCCGTCTG	60.309	20	GCTCACGTCAGAAGAGACCC	59.993	20	197	2120	2316
TR51444_c0_g2	TTTGATGCATGTGCCTTTTT	59.161	20	CGCCTGTACATGACTGTATTCAA	60.068	23	149	1894	2042	TTTTGATGCATGTGCCTTTT	59.161	20	CGCCTGTACATGACTGTATTCAA	60.068	23	150	1893	2042	TTTTGATGCATGTGCCTTTTT	60.482	21	CGCCTGTACATGACTGTATTCAA	60.068	23	150	1893	2042
TR49608_c0_g1	CAAAACCAATCGCCTCAACT	60.11	20	CAGCAGCAACAAACAGATGG	60.449	20	276	1416	1691	TGCTCCGCAGTAAATGTGTC	59.871	20	CAGCAGCAACAAACAGATGG	60.449	20	253	1439	1691	TAAATGTGTCCGCTTCGTGA	60.257	20	CAGCAGCAACAAACAGATGG	60.449	20	243	1449	1691
TR41603_c1_g1	TTTGTGGCGTCCTATTTGAA	59.157	20	TGCCACACTCACAAAACACA	59.751	20	108	1254	1361	TTTGTGGCGTCCTATTTGAA	59.157	20	TCAGGAATTGCCACACTCAC	59.682	20	116	1254	1369	GGCGTCCTATTTGAAATGACA	59.952	21	TGCCACACTCACAAAACACA	59.751	20	103	1259	1361
TR12387_c0_g1	GGAGTTATCTGTGGCAGACG	58.315	20	GCCGGTTTTCAATGGTTCTA	59.938	20	195	308	502	AAAGAAAGGCCTTCACCAAC	58.293	20	GCCGGTTTTCAATGGTTCTA	59.938	20	236	267	502	AAAGAAAGGCCTTCACCAACT	59.268	21	GCCGGTTTTCAATGGTTCTA	59.938	20	236	267	502
TR50513_c1_g1	CAAAGGCACGCTGATCTGTA	60.011	20	CGACAGAGAACAACTGCCAA	60.025	20	203	769	971	GGTGTCGAAAATGCAATCCT	59.939	20	CGACAGAGAACAACTGCCAA	60.025	20	266	706	971	AATGCAATCCTGCAAACACA	60.119	20	CGACAGAGAACAACTGCCAA	60.025	20	257	715	971
TR33226_c5_g1	AATGGGGGTCTTAGGCTTGT	59.827	20	ACAGATGTGCTGGCTGATTG	59.862	20	185	2128	2312	AATGGGGGTCTTAGGCTTGT	59.827	20	CACAGATGTGCTGGCTGATT	59.862	20	186	2128	2313	AATGGGGGTCTTAGGCTTGT	59.827	20	ATCCTGATCAGAGGGCACAG	60.223	20	201	2128	2328
TR39344_c0_g1	CGGTGAATATGTTGGAGGCT	59.955	20	GTTGACCGTAAGCCCCTCTA	59.195	20	279	1033	1311	CGGTGAATATGTTGGAGGCT	59.955	20	TTGACCGTAAGCCCCTCTAT	58.671	20	278	1033	1310	CGGTGAATATGTTGGAGGCT	59.955	20	GTTGACCGTAAGCCCCTCTAT	59.496	21	279	1033	1311
TR57464_c3_g8	GGTAAATCCCCTGAAATTCG	58.368	20	TCGGGAATACCTTTTGACCA	60.301	20	163	272	434	AGGTAAATCCCCTGAAATTCG	59.32	21	TCGGGAATACCTTTTGACCA	60.301	20	164	271	434	GGTAAATCCCCTGAAATTCGAT	60.376	22	TCGGGAATACCTTTTGACCA	60.301	20	163	272	434
TR20798_c0_g1	TATCTTTGGGGCGACTGAAC	60.074	20	TTGACAGGCTGTTTTCACCA	60.278	20	237	68	304	TATCTTTGGGGCGACTGAAC	60.074	20	CAGGCTGTTTTCACCATCAA	59.691	20	233	68	300	TATCTTTGGGGCGACTGAAC	60.074	20	TGGTTGTTTGGGTAGGCTGT	60.41	20	272	68	339
TR20798_c0_g1	TTGACGACCGAGTTTGTTTG	59.734	20	GACAAAAACGAGGTGTCGGT	60.012	20	192	930	1121	TTGACGACCGAGTTTGTTTG	59.734	20	GCTGTGGTGACAGACCAATG	60.162	20	252	930	1181	TTGACGACCGAGTTTGTTTG	59.734	20	ATGTTCAATGCTCACGTTGC	59.728	20	168	930	1097
TR16798_c0_g2	GAGGAATGGCCATCCAGTTA	59.894	20	AGGTCGAGATCAGATGGCAC	60.231	20	121	340	460	GAACTAAAACACCTCGGCCA	60.11	20	AGGTCGAGATCAGATGGCAC	60.231	20	207	254	460	GAGGAATGGCCATCCAGTTA	59.894	20	GGTTCAGGCACAACAACGAT	60.966	20	278	340	617
TR20591_c0_g1	GCATCAAATCCGAATGAACA	59.48	20	GTCGACGTCGCCTCATTATT	60.103	20	171	1527	1697	CAGAGCATCAAATCCGAATG	59.226	20	GTCGACGTCGCCTCATTATT	60.103	20	175	1523	1697	ACAGAGCATCAAATCCGAATG	60.088	21	GTCGACGTCGCCTCATTATT	60.103	20	176	1522	1697
TR39387_c2_g1	GCACGCCTCAATAAAAATCC	59.552	20	TGTTTTTGACAGTTTAAGGCGA	59.795	22	160	254	413	GGCACGCCTCAATAAAAATC	59.552	20	TGTTTTTGACAGTTTAAGGCGA	59.795	22	161	253	413	TGGCACGCCTCAATAAAAAT	60.456	20	TGTTTTTGACAGTTTAAGGCGA	59.795	22	162	252	413
TR41389_c0_g2	CGAAGGGTGATCACAAAAGC	60.636	20	TGAAAAATGAATGATGCCGA	60.012	20	139	36	174	CGAAGGGTGATCACAAAAGC	60.636	20	AGGAGTCCGTGGCCTAGTTT	60.132	20	107	36	142	CGAAGGGTGATCACAAAAGC	60.636	20	TCCGTGGCCTAGTTTACGTC	60.132	20	102	36	137
TR8144_c0_g1	TTTGGAAAGAGGGGGTTTTT	59.787	20	GAAGCACAAACTGTGAGCCA	60.032	20	180	1117	1296	TTTGGAAAGAGGGGGTTTTT	59.787	20	TGAAGCACAAACTGTGAGCC	60.032	20	181	1117	1297	TTTGGAAAGAGGGGGTTTTT	59.787	20	ATGCATTTGCACTGAAGCAC	59.878	20	193	1117	1309
TR57341_c3_g1	AAACTCCTTAAAAATGCCCCA	59.83	21	AGCGTGAGGTTTGCCTTAGA	60.015	20	240	1407	1646	TGCAGCAAAATGAATTGGAA	60.193	20	ACCTCCCTTTCAGAATGCGT	61.019	20	230	1236	1465	AAACTCCTTAAAAATGCCCCA	59.83	21	AACACCCCTAATAAACGCCC	60.075	20	211	1407	1617
TR44255_c0_g1	GCCGCATACAGACTTCACCT	60.285	20	GGCAACTTGGAAAGAAAGCA	60.365	20	177	453	629	GCCGCATACAGACTTCACCT	60.285	20	TGGCAACTTGGAAAGAAAGC	60.365	20	178	453	630	AGGGAAATAGTGTATGCCGC	59.07	20	GGCAACTTGGAAAGAAAGCA	60.365	20	192	438	629
TR5294_c0_g1	TTCACTTAATGCACGTCCCA	60.111	20	GCTTTGACGGAGTGAAAGTCA	60.425	21	263	2255	2517	TTCACTTAATGCACGTCCCA	60.111	20	TGACGGAGTGAAAGTCAGACA	59.451	21	259	2255	2513	TCACTTAATGCACGTCCCAG	59.716	20	GCTTTGACGGAGTGAAAGTCA	60.425	21	262	2256	2517
TR28712_c11_g2	CGACCTCATAACACGACTGG	59.161	20	GGAAGGTGGATGCTTTTTATTTT	59.755	23	147	997	1143	CGACCTCATAACACGACTGG	59.161	20	GATAGGAAGGTGGATGCTTTTT	58.65	22	151	997	1147	CGACCTCATAACACGACTGG	59.161	20	GGAAGGTGGATGCTTTTTATTT	58.566	22	147	997	1143
TR23220_c2_g4	TGAGTTGGGCTCAATCAGAA	59.369	20	GCCAAGATGAAAACCTGCAT	60.081	20	260	266	525	TGAGTTGGGCTCAATCAGAA	59.369	20	TTTGCATGGTTTACTGCCAA	60.111	20	275	266	540	TGAGTTGGGCTCAATCAGAA	59.369	20	TGCATGGTTTACTGCCAAGA	60.257	20	273	266	538
TR36053_c2_g2	CCAGACCGGACTACGAATTG	60.508	20	AACAGTGCCATATTACCCTCG	58.986	21	278	1009	1286	CCAGACCGGACTACGAATTG	60.508	20	CAGTGCCATATTACCCTCGAT	58.941	21	276	1009	1284	TGCGAAATTGCGTGTTTAGT	59.373	20	AACAGTGCCATATTACCCTCG	58.986	21	210	1077	1286
TR58337_c0_g1	TCTCCACCTTTACACACATCTGA	59.648	23	CAACACAAGGTAAGTCAGTCATCA	59.213	24	106	1381	1486	TCTCCACCTTTACACACATCTGA	59.648	23	ACAACACAAGGTAAGTCAGTCATCA	60.013	25	107	1381	1487	TCTCCACCTTTACACACATCTGA	59.648	23	CAACACAAGGTAAGTCAGTCATCAA	60.481	25	106	1381	1486
TR9347_c0_g1	CTCATGCGAACGATGATGAC	60.233	20	GCAGATACTGCTCAAAACCGA	60.401	21	177	1654	1830	CTCATGCGAACGATGATGAC	60.233	20	AGCAGATACTGCTCAAAACCG	59.531	21	178	1654	1831	CTCATGCGAACGATGATGAC	60.233	20	GCAGATACTGCTCAAAACCG	58.529	20	177	1654	1830
TR54535_c0_g1	GCAGTATATGGGCTTTGTTCTTG	60.036	23	GGTTAAATGGCAACCTGTCC	59.292	20	207	1239	1445	GCAGTATATGGGCTTTGTTCTTG	60.036	23	CAACATGGTTAAATGGCAACC	60.103	21	213	1239	1451	GCAGTATATGGGCTTTGTTCTTG	60.036	23	CATGGTTAAATGGCAACCTG	58.892	20	210	1239	1448
TR54535_c0_g1	TTCAGGTCACACAGTCACCC	59.55	20	CATAAACCCCAAAAATGTTGC	59.221	21	264	1981	2244	CAGGTCACACAGTCACCCAT	59.414	20	CATAAACCCCAAAAATGTTGC	59.221	21	262	1983	2244	ATTCAGGTCACACAGTCACCC	59.875	21	CATAAACCCCAAAAATGTTGC	59.221	21	265	1980	2244
TR16427_c0_g1	CCCACCAAGACACATCATCA	60.378	20	TGAAAATGAATCCCCCATTT	59.067	20	263	723	985	AGGCACCCATTCTGCAAGTA	60.657	20	TGAAAATGAATCCCCCATTT	59.067	20	189	797	985	AATAAAGGCACCCATTCTGC	59.046	20	TGAAAATGAATCCCCCATTT	59.067	20	194	792	985
TR34380_c0_g1	TGACGACCCACATTCCAGTA	59.96	20	TTTGAAAAAGGTCAACGTGGT	59.503	21	188	832	1019	TGACGACCCACATTCCAGTA	59.96	20	TTGAAAAAGGTCAACGTGGTT	59.503	21	187	832	1018	CGACCCACATTCCAGTAAGG	60.366	20	TTTGAAAAAGGTCAACGTGGT	59.503	21	185	835	1019
TR38298_c0_g2	CCAAGAGGGTCAAAGATCCA	60.042	20	TCCTCCTTCTCCTCCTCCTC	59.883	20	208	1661	1868	CGGTCCTGAATTTCTCTCCA	60.187	20	TCCTCCTTCTCCTCCTCCTC	59.883	20	225	1644	1868	AGGCTCGGTCCTGAATTTCT	60.212	20	TCCTCCTTCTCCTCCTCCTC	59.883	20	230	1639	1868
TR36022_c2_g2	ATGAAGCAAGCTTGGGGATA	59.668	20	AGTTGATGGCACAAAGATGCT	59.755	21	169	602	770	TATGAAGCAAGCTTGGGGAT	59.668	20	AGTTGATGGCACAAAGATGCT	59.755	21	170	601	770	CTATGAAGCAAGCTTGGGGA	60.344	20	AGTTGATGGCACAAAGATGCT	59.755	21	171	600	770
TR36022_c2_g2	TTCAATATGCACATAAATGTTGGTT	59.589	25	CTGAATGCAACCTTCTTCCC	59.67	20	272	6053	6324	TCAATATGCACATAAATGTTGGTTT	59.589	25	CTGAATGCAACCTTCTTCCC	59.67	20	271	6054	6324	TTCAATATGCACATAAATGTTGG	57.556	23	CTGAATGCAACCTTCTTCCC	59.67	20	272	6053	6324
TR193_c1_g1	AACCCTTGGCTGTTCACTTG	60.149	20	TGGTCTGAATGCCAATACCA	59.924	20	155	270	424	TGTGGGAATAAAAACCTCGG	59.795	20	TGGTCTGAATGCCAATACCA	59.924	20	102	323	424	AACCCTTGGCTGTTCACTTG	60.149	20	ACCAAACGCGGTCATAGTGT	60.44	20	139	270	408
TR52440_c0_g1	TCTTGAGGGCAAGTTTGTGA	59.415	20	AGCTCCCCTGTACCTGGAAT	59.957	20	160	1045	1204	GTGACCTTATCACCATGGCA	59.374	20	AGCTCCCCTGTACCTGGAAT	59.957	20	221	984	1204	TCTTGAGGGCAAGTTTGTGA	59.415	20	CAGTTCTGTGGAAACCAGCA	59.873	20	112	1045	1156
TR970_c0_g1	CTACAGCTCATCCAGTGGCA	60.008	20	TGCTGAAGTACCCGATTTCC	60.074	20	179	548	726	CTACAGCTCATCCAGTGGCA	60.008	20	GTCTAGGGATCGCCTCCTTC	60.176	20	117	548	664	CTACAGCTCATCCAGTGGCA	60.008	20	TTTTGCATGCTTGATTTGGA	60.193	20	273	548	820
TR25315_c0_g1	CCTGTTGACCAGCTAGGGAG	59.861	20	TGGGAGTAATATGGCCTTGC	59.923	20	212	328	539	ACCTGTTGACCAGCTAGGGA	59.721	20	TGGGAGTAATATGGCCTTGC	59.923	20	213	327	539	GACCTGTTGACCAGCTAGGG	59.721	20	TGGGAGTAATATGGCCTTGC	59.923	20	214	326	539
TR777_c0_g1	TATGGAAAAAGCGAGGGAGA	59.778	20	AAATTGCCTGCCTTGCATAC	60.103	20	255	87	341	TTTATGGAAAAAGCGAGGGA	59.655	20	AAATTGCCTGCCTTGCATAC	60.103	20	257	85	341	TATGGAAAAAGCGAGGGAGA	59.778	20	TGCCTGCCTTGCATACAATA	60.237	20	251	87	337
TR21586_c0_g1	TGAAAGGAAATCTTCATACCGAA	59.957	23	CAAGAAAACCCTCAGATCGC	59.813	20	242	932	1173	TGAAAGGAAATCTTCATACCGAA	59.957	23	GGAACTCGCGTCAGAACAAT	60.263	20	222	932	1153	TGAAAGGAAATCTTCATACCGA	58.694	22	CAAGAAAACCCTCAGATCGC	59.813	20	242	932	1173
TR23850_c1_g2	TCCCCAAGATTTGAAACCAG	59.903	20	CATGAAACAGTATGAACTGGGG	59.355	22	279	2238	2516	CTCCCCAAGATTTGAAACCA	59.903	20	CATGAAACAGTATGAACTGGGG	59.355	22	280	2237	2516	TCCCCAAGATTTGAAACCAG	59.903	20	ACATGAAACAGTATGAACTGGGG	60.158	23	280	2238	2517
TR9749_c6_g1	GAATGGCGGTAGTTAATGGC	59.438	20	AAGAAGATGTGGGGTAGGGC	60.328	20	199	2031	2229	TCGTAGGATCGATTCGGATG	60.962	20	AAGAAGATGTGGGGTAGGGC	60.328	20	278	1952	2229	GCGGTAGTTAATGGCGTATGA	59.999	21	AAGAAGATGTGGGGTAGGGC	60.328	20	194	2036	2229
TR236_c0_g1	TCTGCATTTGAACACCGTCT	59.293	20	TTGAAGGTTCAGGAAGGGTG	60.081	20	270	532	801	GTCTGCATTTGAACACCGTC	59.143	20	TTGAAGGTTCAGGAAGGGTG	60.081	20	271	531	801	AGTCTGCATTTGAACACCGTC	60.171	21	TTGAAGGTTCAGGAAGGGTG	60.081	20	272	530	801
TR49040_c0_g1	ACCCTCCGAGATGAGAGACA	59.792	20	TCGAATCAAACCTTCCATCA	59.049	20	156	843	998	ACCCTCCGAGATGAGAGACA	59.792	20	GACATCGAATCAAACCTTCCA	59.925	21	160	843	1002	TCTTGACCCTCCGAGATGAG	60.34	20	TCGAATCAAACCTTCCATCA	59.049	20	161	838	998
TR20642_c1_g1	CAGCCATTTGTTTTTGGCAT	60.866	20	TTCCACGCAATCTTTGTCAT	59.127	20	184	1501	1684	CAGCCATTTGTTTTTGGCAT	60.866	20	ATTCCACGCAATCTTTGTCA	59.127	20	185	1501	1685	CAGCCATTTGTTTTTGGCAT	60.866	20	CGAACACAAATATTCCACGC	59.041	20	196	1501	1696
TR26827_c0_g1	CCTCTCCGGATGTTGGTAGA	60.065	20	GTCTGCCTGTGAATCCACCT	60.12	20	256	953	1208	GACCTCTCCGGATGTTGGTA	59.927	20	GTCTGCCTGTGAATCCACCT	60.12	20	258	951	1208	GACTCGGACCAACCTGAAGA	60.238	20	GTCTGCCTGTGAATCCACCT	60.12	20	154	1055	1208
TR28949_c0_g1	TGGGAAGGAGAGTCAAATGG	60.042	20	TGACAAATGAATCTGTTTGTAGGAA	59.926	25	207	2099	2305	TGGGAAGGAGAGTCAAATGG	60.042	20	TTGACAAATGAATCTGTTTGTAGGA	59.926	25	208	2099	2306	CCATGGGAAGGAGAGTCAAA	60.042	20	TGACAAATGAATCTGTTTGTAGGAA	59.926	25	210	2096	2305
TR10523_c1_g1	GGGAACCAAATCGGAAACTT	60.166	20	TCGGCGTAGTAGGCGTAGTT	59.926	20	271	301	571	GGGAACCAAATCGGAAACTT	60.166	20	GGCGTAGTAGGCGTAGTTGG	59.791	20	269	301	569	ATAAACGCCATGGTGCAGTT	60.395	20	TCGGCGTAGTAGGCGTAGTT	59.926	20	211	361	571
TR29292_c6_g1	AGAAGGAAAAGGAACGGGAA	60.046	20	GGCTATGTCTGCTGCCATTT	60.243	20	276	1878	2153	GAAGAAGGAAAAGGAACGGG	60.046	20	GGCTATGTCTGCTGCCATTT	60.243	20	278	1876	2153	AAGAAGGAAAAGGAACGGGA	60.046	20	GGCTATGTCTGCTGCCATTT	60.243	20	277	1877	2153
TR32401_c0_g1	CTCCTCCGATCCCGAATAAT	60.245	20	ATTCATTTTTGGCGGTGTTG	60.732	20	195	957	1151	TTTCTTTCACGTGCTCCTCC	60.375	20	ATTCATTTTTGGCGGTGTTG	60.732	20	208	944	1151	GATCCCGAATAATAAGGGGC	59.605	20	ATTCATTTTTGGCGGTGTTG	60.732	20	188	964	1151
TR16844_c0_g1	GCTGCTAATGACGACGATGA	59.979	20	CAAGAATCAAGGTCTTGGGC	59.67	20	236	300	535	ACTGCTGCTAATGACGACGA	59.621	20	CAAGAATCAAGGTCTTGGGC	59.67	20	239	297	535	TGGTGCTGCCACTGCTACTA	60.618	20	CAAGAATCAAGGTCTTGGGC	59.67	20	168	368	535
TR19308_c0_g2	CCGTTACTCGGGTTGGTCTA	59.986	20	GCATGTTTGGCGATCAGTAA	59.694	20	269	3129	3397	CCGTTACTCGGGTTGGTCTA	59.986	20	GAATTATGCATGTTTGGCGA	59.525	20	276	3129	3404	CCGTTACTCGGGTTGGTCTA	59.986	20	TATGCATGTTTGGCGATCAG	60.632	20	272	3129	3400
TR36412_c0_g1	CACACAGCAAAATAAGCCACA	59.784	21	CACACAATTTAAACGCACACG	60.081	21	162	455	616	CACACAGCAAAATAAGCCACA	59.784	21	CACAATTTAAACGCACACGAA	59.657	21	160	455	614	TTCACACAGCAAAATAAGCCA	59.359	21	CACACAATTTAAACGCACACG	60.081	21	164	453	616
TR13046_c0_g1	TGAAGGTAAATAATCCATTGGTGA	59.624	24	TGGAAAAATGCAATCCTGAA	59.087	20	177	887	1063	TGAAGGTAAATAATCCATTGGTGA	59.624	24	CTGGAAAAATGCAATCCTGAA	60.06	21	178	887	1064	TGAAGGTAAATAATCCATTGGTGA	59.624	24	CTGGAAAAATGCAATCCTGA	58.695	20	178	887	1064
TR9311_c0_g2	AGTCCATACGAGGAGGCAGA	59.827	20	GCCACCAACATTATTTTCCAA	59.69	21	246	2827	3072	AGTCCATACGAGGAGGCAGA	59.827	20	TTGCCACCAACATTATTTTCC	59.69	21	248	2827	3074	AGGCAGAACCTCCTGATGAA	59.803	20	GCCACCAACATTATTTTCCAA	59.69	21	197	2876	3072
TR38505_c0_g1	TCATTTTTAGGGGGATTGGG	60.845	20	ATGGAAGCAGATCGGAATTG	60.036	20	268	3027	3294	TCATTTTTAGGGGGATTGGG	60.845	20	TGTTTGATGGAAGCAGATCG	59.799	20	274	3027	3300	TCATTTTTAGGGGGATTGGG	60.845	20	GATCGGAATTGTGAACAGCA	59.654	20	259	3027	3285
TR7532_c1_g1	GCTTCCCGGTGTCATGTAAT	59.82	20	CTGACAAAGGCAATCCATCC	60.461	20	150	1648	1797	CAGCCTCGGCAACTGTAAAT	60.27	20	CTGACAAAGGCAATCCATCC	60.461	20	218	1580	1797	TATCAGCAAGTTCGCTTCCC	60.352	20	CTGACAAAGGCAATCCATCC	60.461	20	163	1635	1797
TR38797_c0_g1	GCTGTGTGAGGCTACAGCAA	60.207	20	GTGAAGATTGGGCTCTGTCC	59.661	20	253	1915	2167	GCAAGTGTCATCAGCAATGG	60.272	20	GTGAAGATTGGGCTCTGTCC	59.661	20	237	1931	2167	CGTATTCTGCTGTGTGAGGC	59.47	20	GTGAAGATTGGGCTCTGTCC	59.661	20	261	1907	2167
TR19308_c0_g1	CCGTTACTCGGGTTGGTCTA	59.986	20	GCATGTTTGGCGATCAGTAA	59.694	20	269	3128	3396	CCGTTACTCGGGTTGGTCTA	59.986	20	GAATTATGCATGTTTGGCGA	59.525	20	276	3128	3403	CCGTTACTCGGGTTGGTCTA	59.986	20	TATGCATGTTTGGCGATCAG	60.632	20	272	3128	3399
TR31951_c0_g1	CCATTTGGTAGTTGAAACAGC	57.291	21	TTTCCTAGTGCCAGCAAAAA	58.556	20	143	6547	6689	ACCATTTGGTAGTTGAAACAGC	58.175	22	TTTCCTAGTGCCAGCAAAAA	58.556	20	144	6546	6689	CCATTTGGTAGTTGAAACAGC	57.291	21	TTTCCTAGTGCCAGCAAAAAT	58.888	21	143	6547	6689
TR23428_c0_g1	CCAGTCAACAATAGCTGCCA	59.864	20	CAGGATTGAAGACCAGCCAT	60.073	20	242	1850	2091	CCCCTTGAACTCTCCAGTGA	60.229	20	CAGGATTGAAGACCAGCCAT	60.073	20	210	1882	2091	AGCCCCTTGAACTCTCCAGT	60.252	20	CAGGATTGAAGACCAGCCAT	60.073	20	212	1880	2091
TR56736_c0_g1	CTACATGCAGGTGCCTTTGA	59.864	20	TCTGTGGTGAATCAGTTGCTG	59.889	21	207	355	561	TCTACATGCAGGTGCCTTTG	59.864	20	TCTGTGGTGAATCAGTTGCTG	59.889	21	208	354	561	TACATGCAGGTGCCTTTGAC	59.722	20	TCTGTGGTGAATCAGTTGCTG	59.889	21	206	356	561
TR7267_c1_g2	TTCGAGGTTAATGGGTTGGT	59.288	20	CTGGGCATTTATACGGCAAT	59.816	20	188	48	235	TTCGAGGTTAATGGGTTGGT	59.288	20	GATTCCATTTCACTGGGCAT	59.756	20	200	48	247	TTCGAGGTTAATGGGTTGGT	59.288	20	ATGATTCCATTTCACTGGGC	59.756	20	202	48	249
TR7267_c1_g2	ATTGCCGTATAAATGCCCAG	59.816	20	TGGCATCCTTTTGTTCAAACT	59.601	21	115	216	330	ATTGCCGTATAAATGCCCAG	59.816	20	AGATTGGCATCCTTTTGTTCA	59.56	21	119	216	334	ATTGCCGTATAAATGCCCAG	59.816	20	GATTGGCATCCTTTTGTTCA	58.547	20	118	216	333
TR32257_c0_g1	GAACGAACTATGAATGAATTTCCA	59.399	24	TTGCAAACAAGGAATCCTGC	61.149	20	197	936	1132	TGAACGAACTATGAATGAATTTCC	59.399	24	TTGCAAACAAGGAATCCTGC	61.149	20	198	935	1132	GAACGAACTATGAATGAATTTCCA	59.399	24	TGCAAACAAGGAATCCTGC	59.79	19	196	936	1131
TR56757_c0_g1	ACCCTCCAGATTTAACATTTCA	57.608	22	ACATGTCGGAGGGAAGTCAC	59.969	20	158	2	159	ACCCTCCAGATTTAACATTTCA	57.608	22	CAAACATGTCGGAGGGAAGT	59.966	20	161	2	162	ACCCTCCAGATTTAACATTTCA	57.608	22	CACACGCTTGTACCCAACAG	60.213	20	245	2	246
TR55802_c0_g1	GCCGTTTACAACACCACACA	60.472	20	TGGGTTCAAAACAGGCTTTC	60.088	20	277	873	1149	TGCCGTTTACAACACCACAC	60.472	20	TGGGTTCAAAACAGGCTTTC	60.088	20	278	872	1149	CTGCCGTTTACAACACCACA	60.609	20	TGGGTTCAAAACAGGCTTTC	60.088	20	279	871	1149
TR26841_c0_g1	TCGGATGCATTTCTTACGC	59.784	19	GCAAGGAATGAAACAAGAAACA	59.248	22	280	1607	1886	TTTACAGGGTTTGGACTCGG	59.964	20	TGGTCAATGAATTGAATAGGAATG	60.076	24	244	1591	1834	GTTTGGACTCGGATGCATTT	59.939	20	TGGTCAATGAATTGAATAGGAATG	60.076	24	236	1599	1834
TR51441_c1_g1	ATGGTGGCATGTCAAAATCC	60.591	20	ACGTTCTGTCTGCACTTTCA	57.002	20	260	2425	2684	TTGAATGAAAACTCAAATGCAG	57.954	22	TGATGATGCTTCGCTTGTTC	59.955	20	276	2480	2755	TGGCATGTCAAAATCCAAAT	58.82	20	ACGTTCTGTCTGCACTTTCA	57.002	20	256	2429	2684
TR57358_c1_g1	TCACGATCACGTTCAAGGAG	59.831	20	GCTGCTTCCAGAGGATGAAC	59.957	20	102	4283	4384	TCACGATCACGTTCAAGGAG	59.831	20	GGTGATCTTGAGCTGCTTCC	59.957	20	113	4283	4395	GGTCCAGATCTGCAAGAAGG	59.803	20	ACGGTGATCTTGAGCTGCTT	60.02	20	159	4239	4397
TR5823_c0_g1	CGGTATCCCAATTCCCTTTT	60.013	20	TTGAAGGATTGTTTTGTTTCTTGA	60.017	24	156	964	1119	CCAATCGCAGATTTTGACCT	60.074	20	TTGAAGGATTGTTTTGTTTCTTGA	60.017	24	211	909	1119	CGGTATCCCAATTCCCTTTT	60.013	20	TGAAGGATTGTTTTGTTTCTTGA	58.774	23	155	964	1118
TR10715_c2_g1	CAACTGAAGGTTTGCAACTGT	57.927	21	TTGGCACAGCTGACCACTTA	60.449	20	280	1458	1737	CAAGCGAATTCAGTGTTGCT	59.076	20	TCTGTATAAATGCAGCTGGGA	58.4	21	279	1412	1690	CAAGCGAATTCAGTGTTGCT	59.076	20	TCTGTATAAATGCAGCTGGGAC	59.252	22	279	1412	1690
TR52492_c0_g1	AACCACAAAATCAACAAAGCCT	59.913	22	CCTTGGATTCGGTTTGCTTA	60.067	20	245	226	470	CCACAAAATCAACAAAGCCT	57.729	20	CCTTGGATTCGGTTTGCTTA	60.067	20	243	228	470	AACCACAAAATCAACAAAGCC	58.986	21	TACCTGCATGACCCTTGGAT	60.34	20	257	226	482
TR9015_c0_g1	AGCAAGAAAAGTGACTGGCTT	58.266	21	TCTGACTGCAAGTTTTGGACA	59.475	21	280	49	328	GCAAGAAAAGTGACTGGCTT	57.203	20	TCTGACTGCAAGTTTTGGACA	59.475	21	279	50	328	CAAGAAAAGTGACTGGCTTGA	58.146	21	TCTGACTGCAAGTTTTGGACA	59.475	21	278	51	328
TR26525_c1_g1	GCAACAGGGCTGGAATTTTA	60.074	20	GCAGCCCACATCTTGATTTT	60.081	20	203	430	632	CAGGGCTGGAATTTTAGCTG	59.839	20	GCAGCCCACATCTTGATTTT	60.081	20	199	434	632	TGGACTGGCCACTTATCACC	60.924	20	GCAGCCCACATCTTGATTTT	60.081	20	249	384	632
TR56922_c0_g1	TAGCGAACTTGGCAAAAGGT	59.883	20	TGCTGAGAAGGCTGAGGAGT	60.284	20	169	1622	1790	TAGCGAACTTGGCAAAAGGT	59.883	20	ACAGAATTTTGCGGCTGATT	59.713	20	199	1622	1820	CGAACTTGGCAAAAGGTGTT	60.147	20	TGCTGAGAAGGCTGAGGAGT	60.284	20	166	1625	1790
TR55336_c0_g2	GCGGATAGCATTCTTCTGGA	60.318	20	GGCGTCGTGCTTATGTAAAA	58.844	20	258	3681	3938	GCGGATAGCATTCTTCTGGA	60.318	20	GGCGTCGTGCTTATGTAAAAT	59.159	21	258	3681	3938	ATCGCGGATAGCATTCTTCT	58.909	20	GGCGTCGTGCTTATGTAAAA	58.844	20	261	3678	3938
TR25436_c0_g1	CTTTGCTGTTTTGGTGCAGA	60.027	20	TTGCTCATGGGAGACAATCA	60.201	20	225	951	1175	CTTTGCTGTTTTGGTGCAGA	60.027	20	TGCTCATGGGAGACAATCAG	59.787	20	224	951	1174	TGCTGTTTTGGTGCAGATGT	60.31	20	TTGCTCATGGGAGACAATCA	60.201	20	222	954	1175
TR41595_c0_g1	GCTGGTCTCCCACTTTACCA	60.111	20	GAAGGCATATCAGCCAGAGC	59.946	20	146	957	1102	GGAATGGTTTGTGCAGGAAT	59.797	20	GAAGGCATATCAGCCAGAGC	59.946	20	243	860	1102	CAGGCTGGTCTCCCACTTTA	60.246	20	GAAGGCATATCAGCCAGAGC	59.946	20	149	954	1102
TR26333_c0_g1	GACTTTGATAAAGCCGGCTAAG	59.436	22	TTTTCAATTGGAGGCAGCTT	59.823	20	263	53	315	GACTTTGATAAAGCCGGCTAAG	59.436	22	TCCTTTTCAATTGGAGGCAG	60.184	20	266	53	318	GACTTTGATAAAGCCGGCTAAG	59.436	22	CGGGGATATTCGTGTCACTT	59.813	20	129	53	181
TR24374_c0_g1	CTATTTTCGGATGCAGTGCC	60.606	20	CAAATATTGCAGGCTCGGTT	60.096	20	261	1323	1583	CTATTTTCGGATGCAGTGCC	60.606	20	AGCCAGTTCAAGGGCAGTTA	59.875	20	235	1323	1557	CTATTTTCGGATGCAGTGCC	60.606	20	GCAGGCTCGGTTTTATTGAG	59.845	20	253	1323	1575
TR25087_c0_g1	GAAAAACCCCAAACAAGCAA	59.953	20	CCAGTTCTTGCCCCAAATTA	59.931	20	230	172	401	GAAAAACCCCAAACAAGCAA	59.953	20	TCTTGCCCCAAATTAAGCAC	60.074	20	225	172	396	GAAAAACCCCAAACAAGCAA	59.953	20	CCCCAAATTAAGCACACACC	60.227	20	220	172	391
TR21140_c2_g1	CCAAGTTAGAATTATTTGAAAGAGACA	58.516	27	CCCTTCCAATGACCTCCATA	59.744	20	175	14	188	TTCCAAGTTAGAATTATTTGAAAGAGA	58.199	27	CCCTTCCAATGACCTCCATA	59.744	20	177	12	188	TCCAAGTTAGAATTATTTGAAAGAGA	57.036	26	CCCTTCCAATGACCTCCATA	59.744	20	176	13	188
TR54597_c2_g1	TTTCTAATGCTGTTTTTATCCGC	59.67	23	TGGTTCCACGAATGTTGTGT	59.855	20	119	456	574	TTCTAATGCTGTTTTTATCCGC	58.463	22	TGGTTCCACGAATGTTGTGT	59.855	20	118	457	574	CCAGACACAACCTCTACTGTGC	59.833	22	AACTGGTTCCACGAATGTTG	58.469	20	195	383	577
TR23905_c1_g1	GATGAGCAAGCTGTCACCTG	59.577	20	ATCCAACTTGCCGAAAAATG	59.938	20	178	1222	1399	GATGAGCAAGCTGTCACCTG	59.577	20	TCCAACTTGCCGAAAAATGT	60.481	20	177	1222	1398	CCCGGCATCTAGTGATTGAA	60.992	20	ATCCAACTTGCCGAAAAATG	59.938	20	104	1296	1399
TR20142_c0_g1	AGTGCTCTGACTGTTTGGCA	59.622	20	TTCGTTGTGATGAAATCCGA	60.049	20	207	1830	2036	AGTGCTCTGACTGTTTGGCA	59.622	20	TCGTTGTGATGAAATCCGAA	60.049	20	206	1830	2035	GCTCTGACTGTTTGGCACCT	60.453	20	TCGTTGTGATGAAATCCGAA	60.049	20	203	1833	2035
TR40323_c0_g1	TAGCCAGCACCTTACCATCC	60.096	20	GCCACTGAATCCAATCACCT	59.934	20	271	2001	2271	TAGCCAGCACCTTACCATCC	60.096	20	AGCCACTGAATCCAATCACC	59.934	20	272	2001	2272	ACCTTACCATCCTGCTGCAC	60.142	20	GCCACTGAATCCAATCACCT	59.934	20	263	2009	2271
TR54014_c0_g1	GATCTCCAAAAGGTGCCAAA	60.051	20	GGCAATGTCTTCCCCATCTA	59.894	20	191	165	355	CCAAAAGGTGCCAAAAAGAA	60.081	20	GGCAATGTCTTCCCCATCTA	59.894	20	186	170	355	AAAAAGAACCAGCCTGCAAA	59.861	20	GGCAATGTCTTCCCCATCTA	59.894	20	174	182	355
TR36508_c0_g1	TGGGTACCACAATCAGAGCA	60.112	20	GGCATCTGTCTGCAGTTTCA	59.992	20	240	808	1047	CATCGGATCCATTCACTCCT	59.886	20	GGCATCTGTCTGCAGTTTCA	59.992	20	275	773	1047	ATCGGATCCATTCACTCCTG	59.886	20	GGCATCTGTCTGCAGTTTCA	59.992	20	274	774	1047
TR8928_c0_g1	CGGCAGCTTAAAAAGCAAGT	59.669	20	CCCTGCACCAATTATCCACT	59.813	20	201	1642	1842	CGGCAGCTTAAAAAGCAAGT	59.669	20	CAGCAGCAGCAGTTTTTGTC	59.788	20	241	1642	1882	CGGCAGCTTAAAAAGCAAGT	59.669	20	AGCAGCAGCAGTTTTTGTCA	59.788	20	240	1642	1881
TR8313_c0_g1	AACGAAAACAGCTGAGCAGG	60.571	20	GCGTCGGTATCACCTTCTGT	60.142	20	123	242	364	AACGAAAACAGCTGAGCAGG	60.571	20	TGTGTTGTAAGGCGTCGGTA	60.172	20	134	242	375	AACGAAAACAGCTGAGCAGG	60.571	20	TAAGGCGTCGGTATCACCTT	59.592	20	127	242	368
TR20743_c0_g2	ATATTCGAAAAGTCGCGTGG	60.096	20	ACGGGTGCCTAAAATGACAA	60.365	20	267	71	337	CGATATTCGAAAAGTCGCGT	60.23	20	ACGGGTGCCTAAAATGACAA	60.365	20	269	69	337	ATATTCGAAAAGTCGCGTGG	60.096	20	AAGTCGCTCGATACCTTTGG	59.336	20	179	71	249
TR9747_c0_g1	CCAATTAGCTCGTTGCCACT	60.27	20	CTAGGTTAGCCGGTGTCGAG	59.891	20	231	10	240	CCAATTAGCTCGTTGCCACT	60.27	20	TAGCCGGTGTCGAGTCTTTT	59.875	20	225	10	234	CCAATTAGCTCGTTGCCACT	60.27	20	TTAGCCGGTGTCGAGTCTTT	59.875	20	226	10	235
TR9747_c0_g1	ATGATTGGCATCAAGAAGGC	60.043	20	GAGCAATGTGTTTTCCAGCA	59.847	20	222	2127	2348	ATGATTGGCATCAAGAAGGC	60.043	20	TGAGCAATGTGTTTTCCAGC	59.847	20	223	2127	2349	ATGATTGGCATCAAGAAGGC	60.043	20	GCTGCATCAATTTGAGGTGA	59.805	20	278	2127	2404
TR9747_c0_g1	TCAAATTGATGCAGCTTTGC	59.96	20	ATCCCATTGGCAATCAGAAC	59.756	20	214	2390	2603	TGCTGGAAAACACATTGCTC	59.847	20	ATCCCATTGGCAATCAGAAC	59.756	20	275	2329	2603	GCTGGAAAACACATTGCTCA	59.847	20	ATCCCATTGGCAATCAGAAC	59.756	20	274	2330	2603
TR9747_c0_g1	TGCCTGCCAGTAAATGTTCA	60.257	20	CACCTGAAAGAAATCTGCTGC	60.008	21	280	2674	2953	TGCCTGCCAGTAAATGTTCA	60.257	20	TGAAAGAAATCTGCTGCCATT	59.837	21	276	2674	2949	GCCTGCCAGTAAATGTTCAG	58.379	20	CCTGAAAGAAATCTGCTGCC	59.955	20	277	2675	2951
TR55698_c0_g1	CCGTATCGGTGCTGTAACAA	59.609	20	GCTCACAAAAACGACACTCG	59.49	20	150	183	332	CCGTATCGGTGCTGTAACAA	59.609	20	AGAAATTCCGATTCACGCAA	60.585	20	248	183	430	CCGTATCGGTGCTGTAACAA	59.609	20	TAGAAATTCCGATTCACGCA	59.257	20	249	183	431
TR23249_c0_g1	CTTGCTTTTTCACGTGTTGA	57.539	20	CGTAAAGCTGAGCGTCACAT	59.101	20	253	2213	2465	ACTTGCTTTTTCACGTGTTGA	58.471	21	CGTAAAGCTGAGCGTCACAT	59.101	20	254	2212	2465	CTTGCTTTTTCACGTGTTGA	57.539	20	AAGCTGAGCGTCACATGAGTT	60.073	21	249	2213	2461
TR35344_c2_g2	CCTTTTTGAAACAGAAGCCTG	59.004	21	CCGAGAATTCAACATGAGCA	59.799	20	215	18	232	CCTTTTTGAAACAGAAGCCTG	59.004	21	TTGTGTGTACAATGGGGCAT	59.697	20	248	18	265	CCTTTTTGAAACAGAAGCCTG	59.004	21	GGCATTTATGCTGGATCACC	60.304	20	233	18	250
TR35344_c2_g2	CGCTTTTTCAGGTCCTTACG	59.876	20	CACATCCACACGAAGTGTCC	60.005	20	232	1313	1544	CGCTTTTTCAGGTCCTTACG	59.876	20	CCACATCCACACGAAGTGTC	60.005	20	233	1313	1545	TGATTGCCTCATTTTCCACA	60.049	20	AAAGAGAGCTGACCACCCAA	59.844	20	226	1251	1476
TR55490_c0_g1	TGGAATTCACATTTCCAGCA	60.049	20	GTTTTCCCCAGTCAGGGAAT	60.169	20	235	914	1148	TGGAATTCACATTTCCAGCA	60.049	20	ATGTGTTTTCCCCAGTCAGG	59.82	20	239	914	1152	TTTCCAGCACGCATGTTAAA	60.251	20	GTTTTCCCCAGTCAGGGAAT	60.169	20	224	925	1148
TR38540_c2_g2	TCAGCCACTGTCCATTTTCA	60.24	20	TGCCATTTTCCCCATTTATC	59.599	20	161	3349	3509	TGTTTTTCAGCCACTGTCCA	60.278	20	TGCCATTTTCCCCATTTATC	59.599	20	167	3343	3509	CAGCCACTGTCCATTTTCAG	59.288	20	TGCCATTTTCCCCATTTATC	59.599	20	160	3350	3509
TR38269_c0_g1	AGCTGTTCTGTGCGAATCCT	60.02	20	TCCATGGAAACTGACCAACA	59.935	20	253	306	558	TTTTCAAGCTGTTCTGTGCG	60.172	20	TCCATGGAAACTGACCAACA	59.935	20	259	300	558	CTGTGCGAATCCTCCCTAAC	59.694	20	TCCATGGAAACTGACCAACA	59.935	20	246	313	558
TR55727_c0_g1	TGTTGTTTTTCAAGATGCTTTCA	59.787	23	TACGGGAATTGCCTCAAAGA	60.576	20	185	1926	2110	CACCATGGGAACTGAGCATA	59.522	20	TTTTCTGCTGGCAAAGAATAAAT	59.326	23	280	1751	2030	TGGGAACTGAGCATAAAGTGA	58.365	21	AACATTTTTCTGCTGGCAAAG	59.393	21	280	1756	2035
TR40258_c0_g1	CTTCCTCGACCCAGAGAGTG	59.978	20	GAACCAAGGTCCTCCTCCTC	60.05	20	180	2841	3020	CTTCCTCGACCCAGAGAGTG	59.978	20	ACCAAGGTCCTCCTCCTCAT	59.929	20	178	2841	3018	CTTCCTCGACCCAGAGAGTG	59.978	20	CCGTAGGTGTCCATCTCCAT	59.803	20	258	2841	3098
TR11095_c0_g2	ACGAACAAGAAACTGGAGCG	60.431	20	AGTAAGGTTCCACCGTCGTG	60.028	20	245	311	555	TGACAACGTGCAGTGGATTT	60.16	20	CTTTCCCTAACCATGACCCC	60.549	20	186	246	431	TGACAACGTGCAGTGGATTT	60.16	20	TTTCCCTAACCATGACCCCT	60.549	20	185	246	430
TR23224_c0_g1	ACGGCAACAGGGACTTAATG	59.993	20	TCTTGACCCACACAAGTCTCA	59.294	21	201	3207	3407	ACGGCAACAGGGACTTAATG	59.993	20	TTGACCCACACAAGTCTCAAA	59.172	21	199	3207	3405	ACGGCAACAGGGACTTAATG	59.993	20	GACCCACACAAGTCTCAAACAA	60.051	22	197	3207	3403
TR41389_c0_g1	CGAAGGGTGATCACAAAAGC	60.636	20	TGAAAAATGAATGATGCCGA	60.012	20	139	36	174	CGAAGGGTGATCACAAAAGC	60.636	20	AGGAGTCCGTGGCCTAGTTT	60.132	20	107	36	142	CGAAGGGTGATCACAAAAGC	60.636	20	TCCGTGGCCTAGTTTACGTC	60.132	20	102	36	137
TR23493_c0_g1	ATCTGCCGCAAGCTCTACAT	60.007	20	GCAAAACTCTGATCGTCTCTCA	59.621	22	260	949	1208	TACATCTGCCACACCGTGAT	59.992	20	GCAAAACTCTGATCGTCTCTCA	59.621	22	245	964	1208	ATCTGCCGCAAGCTCTACAT	60.007	20	GGCAAAACTCTGATCGTCTCTC	60.391	22	261	949	1209
TR51786_c3_g10	TCCAAGCTGCTTTTTGTGTG	60.027	20	CAGAAAACCGTACCGGACAT	59.853	20	242	1098	1339	AGCTGCTTTTTGTGTGGCTT	60.059	20	CAGAAAACCGTACCGGACAT	59.853	20	238	1102	1339	AAGCTGCTTTTTGTGTGGCT	60.059	20	CAGAAAACCGTACCGGACAT	59.853	20	239	1101	1339
TR11260_c1_g1	TGTGACTGCTAACTCGGTGC	60.056	20	AGCTAGCTCAGCCCAGACAG	59.914	20	193	897	1089	TGTGACTGCTAACTCGGTGC	60.056	20	CGCAACAATCAGCTCGAGTA	60.157	20	260	897	1156	GGTGCCAGCTGTCTACCATT	60.142	20	AGCTAGCTCAGCCCAGACAG	59.914	20	178	912	1089
TR50166_c5_g1	GCAAACATAATAATGCAAATGGG	60.431	23	GAAGAGGGGTGCACATGTTT	59.973	20	165	596	760	GGCAAACATAATAATGCAAATGG	60.431	23	GAAGAGGGGTGCACATGTTT	59.973	20	166	595	760	TCCTCATTTTTAATGTCCAGTCC	59.363	23	GAAGAGGGGTGCACATGTTT	59.973	20	258	503	760
TR2347_c0_g1	CAACGCGTCTGGAAACAGTA	59.904	20	TTCATTCCATTTAACCTCGTTG	58.987	22	216	932	1147	GTGCCCAAGATTCTCTGCAT	60.226	20	TTCATTCCATTTAACCTCGTTG	58.987	22	257	891	1147	ATCTCAACGCGTCTGGAAAC	60.263	20	TTCATTCCATTTAACCTCGTTG	58.987	22	220	928	1147
TR31206_c0_g1	CAAGCATCTGATTGGCTGAA	59.948	20	ACTGCCTGCTATCCACCAAC	60.142	20	279	80	358	TCTGGCAAACCAGATGTTCA	60.24	20	ACTGCCTGCTATCCACCAAC	60.142	20	241	118	358	GGCCTGGATATCAGGAACAA	59.894	20	GCAACTGCAGCCACTACAAG	59.664	20	225	193	417
TR8995_c0_g1	ATTGCAGACAGAACGCACAG	60.056	20	TGCATTGTTGGGGATTCATA	59.745	20	238	165	402	ATTGCAGACAGAACGCACAG	60.056	20	GTCTGCAAGGGTGTCTCGTT	60.307	20	275	165	439	CAACCATGGATTGCAGACAG	60.112	20	TGCATTGTTGGGGATTCATA	59.745	20	247	156	402
TR48245_c0_g1	TTTGTCGTTGTGACGGAGTG	60.757	20	TTTCCTGGCGCTTCACATA	60.35	19	138	390	527	TTTGTCGTTGTGACGGAGTG	60.757	20	TGGATTGCCTTAGCAAGAAA	58.506	20	215	390	604	CGCGTGCTTGCTTGTTTAT	60.029	19	TTTCCTGGCGCTTCACATA	60.35	19	233	295	527
TR56992_c0_g1	TGGATTTTCATATCGAGGGC	59.862	20	ACACTTGGTCTTCCTGACCG	60.151	20	198	527	724	GAGGGCTTAGCGCAGAACTA	59.752	20	ACACTTGGTCTTCCTGACCG	60.151	20	184	541	724	TTCATATCGAGGGCTTAGCG	60.323	20	ACACTTGGTCTTCCTGACCG	60.151	20	192	533	724
TR56992_c0_g1	TGGATTTTCATATCGAGGGC	59.862	20	ACACTTGGTCTTCCTGACCG	60.151	20	198	4246	4443	GAGGGCTTAGCGCAGAACTA	59.752	20	ACACTTGGTCTTCCTGACCG	60.151	20	184	4260	4443	TTCATATCGAGGGCTTAGCG	60.323	20	ACACTTGGTCTTCCTGACCG	60.151	20	192	4252	4443
TR40354_c2_g1	TCACACTCGTAGCATTTGCC	59.871	20	TAGGGAGTGCCCAAGTGAAC	60.111	20	189	2557	2745	CACCACCACTTTTTCTGCCT	60.149	20	TAGGGAGTGCCCAAGTGAAC	60.111	20	152	2594	2745	CCTTGTTGGGACAGTCTCGT	60.151	20	TAGGGAGTGCCCAAGTGAAC	60.111	20	227	2519	2745
TR40354_c2_g1	GTTCACTTGGGCACTCCCTA	60.111	20	AAATTCAGGTCACACGAGGG	59.966	20	268	2726	2993	CCTACGTTCACTTGGGCACT	60.171	20	AAATTCAGGTCACACGAGGG	59.966	20	273	2721	2993	CCTACGTTCACTTGGGCACT	60.171	20	ATTCAGGTCACACGAGGGAG	60.112	20	271	2721	2991
TR28038_c1_g1	TGATGCCGCAGACTTTACTG	60.011	20	CCACTCTGGTCGTTGGGTAT	59.844	20	247	2005	2251	AGGTGGCGTTTCATTTTCAC	59.978	20	CCACTCTGGTCGTTGGGTAT	59.844	20	187	2065	2251	TGTTCAAGAACAGTCGCCAG	60.025	20	CCACTCTGGTCGTTGGGTAT	59.844	20	205	2047	2251
TR29798_c0_g1	TTACGGCACCCGGTAGTTTA	60.368	20	CGAAAGAAGACGAAGACCCA	60.366	20	235	1809	2043	TAAAGTTACGGCACCCGGTA	60.368	20	CGAAAGAAGACGAAGACCCA	60.366	20	240	1804	2043	GACGTAAAGTTACGGCACCC	59.499	20	CGAAAGAAGACGAAGACCCA	60.366	20	244	1800	2043
TR49598_c0_g3	GGAAAACTATGATGCTGTAACCA	58.2	23	CAAGGTGTGGACTTGCAGAA	59.873	20	273	1132	1404	TTCAAACAGATGTTACAAATGGG	58.909	23	CCTGCAATCTGTGGATTTTG	59.123	20	267	1079	1345	AGGAAAACTATGATGCTGTAACCA	59.122	24	CAAGGTGTGGACTTGCAGAA	59.873	20	274	1131	1404
TR25994_c0_g1	CGGGGTCAGAGTCTCTTTCA	60.377	20	AAATGGGATCCTTCCCCATA	60.337	20	261	449	709	TTGACAAAATATCCGGGGTC	59.622	20	AAATGGGATCCTTCCCCATA	60.337	20	274	436	709	CTGAGCCTCGTGACAAAACA	60.025	20	AAAGCGGCGAAAGATAGACC	60.711	20	220	389	608
TR29310_c2_g1	ATCTGCAAATGGAATCTCCC	58.937	20	AGCAACTCCTGATGGAGAACTT	59.392	22	238	923	1160	ATCTGCAAATGGAATCTCCC	58.937	20	GCAACTCCTGATGGAGAACTT	58.391	21	237	923	1159	TCTGCAAATGGAATCTCCCTA	59.654	21	AGCAACTCCTGATGGAGAACTT	59.392	22	237	924	1160
TR5054_c0_g1	TCCATTGTTTGAAATGAACTTTG	59.02	23	GGGCACTGGCTGATCTGTAT	60.104	20	254	2486	2739	TCCATTGTTTGAAATGAACTTTGT	59.793	24	GGGCACTGGCTGATCTGTAT	60.104	20	254	2486	2739	CCATTGTTTGAAATGAACTTTGTC	59.793	24	GGGCACTGGCTGATCTGTAT	60.104	20	253	2487	2739
TR50697_c0_g1	GCGAAAGCACACAATAACCA	59.735	20	TTTGCAACCTTCTTTGCCTT	59.861	20	126	1009	1134	GCGAAAGCACACAATAACCA	59.735	20	AGCATACCCAATATGGCTGG	59.807	20	165	1009	1173	GCGAAAGCACACAATAACCA	59.735	20	AGCATACCCAATATGGCTGG	59.807	20	206	1009	1214
TR13116_c0_g2	GTTTCGTCCAATCACAACCC	60.218	20	GTTGTCGGTTCAGTGGAGGT	60.009	20	165	665	829	GTTTCGTCCAATCACAACCC	60.218	20	TCATTGGCGTTGTTGACATT	59.972	20	128	665	792	ACAACTTTGGGTACGTTGGG	59.751	20	GTTGTCGGTTCAGTGGAGGT	60.009	20	259	571	829
TR44828_c3_g2	CCTCATGATAACACCGTGGC	61.329	20	TATTACACGGTCGGATGCAA	59.953	20	194	460	653	CCTCATGATAACACCGTGGC	61.329	20	TGGTTTTGGGGCAGTCTTAG	60.103	20	157	460	616	CCTCATGATAACACCGTGGC	61.329	20	TGCAAGATTCCAGAAAGGGT	59.67	20	179	460	638
TR25507_c50_g21	CCATGGTTACCCATTCTCCA	60.572	20	ATACAAGCAGGTGCGAAAGC	60.416	20	272	569	840	CCATGGTTACCCATTCTCCA	60.572	20	AAAAAGGCATGCTGTGTTCA	59.322	20	149	569	717	CCATGGTTACCCATTCTCCA	60.572	20	TACAAGCAGGTGCGAAAGC	60.15	19	271	569	839
TR9088_c0_g2	GTCACAGGCTCCCTTGCTAA	60.397	20	TATTTTGCCTGCTAAGGCGT	59.875	20	227	657	883	TCACAGGCTCCCTTGCTAAC	60.397	20	TATTTTGCCTGCTAAGGCGT	59.875	20	226	658	883	TCACAGGCTCCCTTGCTAAC	60.397	20	GGGAGAAGGGATATTTTGCC	59.74	20	237	658	894
TR51463_c0_g1	GGTCCATGATAAAGGATGGC	59.204	20	ACCAAACCATGTGATGCTGA	59.967	20	256	1007	1262	GGTCCATGATAAAGGATGGC	59.204	20	GGTACTGAGTGCAACCCACA	59.597	20	199	1007	1205	GGTCCATGATAAAGGATGGC	59.204	20	TGGTACTGAGTGCAACCCAC	59.597	20	200	1007	1206
TR31362_c0_g1	GAGGTTGTAGCCGGTGTTGT	60.035	20	AATGCAAGCAACCAAACCA	60.104	19	270	1182	1451	AGAGGTTGTAGCCGGTGTTG	60.171	20	AATGCAAGCAACCAAACCA	60.104	19	271	1181	1451	GGAGCCGATGGAGTTGTAGA	60.218	20	AATGCAAGCAACCAAACCAG	61.06	20	123	1329	1451
TR11498_c0_g1	AACATCCCGCTTGTATGGTC	59.82	20	GCAATTATTGGACCCCCTCT	60.152	20	227	2836	3062	AACATCCCGCTTGTATGGTC	59.82	20	AGCAATTATTGGACCCCCTC	60.152	20	228	2836	3063	CATCAAACATCCCGCTTGTA	59.542	20	AGCAATTATTGGACCCCCTC	60.152	20	233	2831	3063
TR9316_c0_g1	AGATAGTTCATCATGGGCCG	59.917	20	CAGGGGACACAAGGATATGG	60.187	20	228	1016	1243	AGATAGTTCATCATGGGCCG	59.917	20	ACAGTGGGTACAGGGGACAC	59.732	20	238	1016	1253	AGATAGTTCATCATGGGCCG	59.917	20	GTGGGTACAGGGGACACAAG	60.275	20	235	1016	1250
TR28782_c0_g1	TTGGCGTTCAACTGTTTTTG	59.746	20	CACACGAGCCCTTCTACACA	59.897	20	227	2752	2978	TTGGCGTTCAACTGTTTTTG	59.746	20	AAGGCAGTTCCCTACAGCAA	59.875	20	280	2752	3031	GTCGCAGTTTGAGTGTCTGC	59.628	20	CACACGAGCCCTTCTACACA	59.897	20	190	2789	2978
TR21654_c0_g1	GCCAAAAGGAAAACTGCCTA	59.338	20	GTAGATCCAGCTCTGCCAGC	60.127	20	256	153	408	GCCAGTACTGTGCCAAAAGG	60.689	20	GTAGATCCAGCTCTGCCAGC	60.127	20	267	142	408	CCAGTACTGTGCCAAAAGGAA	60.154	21	GTAGATCCAGCTCTGCCAGC	60.127	20	266	143	408
TR40997_c1_g1	TGGATGCATTGGTGTTCCTA	59.924	20	CTTTGATACGGGCGGGAC	61.41	18	237	779	1015	TGGATGCATTGGTGTTCCT	59.909	19	CTTTGATACGGGCGGGAC	61.41	18	237	779	1015	TCCAGTATGACCACACACCAA	59.864	21	CTTTGATACGGGCGGGAC	61.41	18	168	848	1015
TR25836_c0_g1	TATCGTTGTCAAGTGTCGGC	59.722	20	AGCCCAAAACTCACACCTTG	60.149	20	271	165	435	CAACATGAAGGCTGGTTTGA	59.691	20	AGCCCAAAACTCACACCTTG	60.149	20	115	321	435	TATCGTTGTCAAGTGTCGGC	59.722	20	ACTCACACCTTGAGACCCCA	60.563	20	263	165	427
TR37491_c0_g1	AGACATGTGCCACAACATGG	60.45	20	TGTGAACATCCAGATCAGCC	59.637	20	180	119	298	GCAAGCCCAGTTTCAGTGAT	60.263	20	GCCTGCACATTGGGAGTAAG	60.657	20	278	4	281	GCAAGCCCAGTTTCAGTGAT	60.263	20	AGCCTGCACATTGGGAGTAA	60.657	20	279	4	282
TR34596_c0_g1	ATCTTCAACCTTCTCCGGGT	59.935	20	AAGAGAATGGCGAAGCCTCT	60.484	20	239	1966	2204	ATCTTCAACCTTCTCCGGGT	59.935	20	AGAAACCAAAGAGAATGGCG	59.312	20	247	1966	2212	AGCATCTTCAACCTTCTCCG	59.43	20	GAAACCAAAGAGAATGGCGA	60.192	20	249	1963	2211
TR25905_c0_g1	CACGCTGTAGTCAATCCGTC	59.318	20	CCGGGGTGTTGTTTATTTTG	60.081	20	224	3017	3240	ACGCTGTAGTCAATCCGTCA	59.318	20	CCGGGGTGTTGTTTATTTTG	60.081	20	223	3018	3240	GACACGCTGTAGTCAATCCG	59.318	20	CCGGGGTGTTGTTTATTTTG	60.081	20	226	3015	3240
TR26801_c3_g1	CCAGGCTGGTTTGGTCTTAAC	60.889	21	ATACTGGTCTGGGGAGCCTT	59.957	20	233	124	356	CCAGGCTGGTTTGGTCTTAAC	60.889	21	AATACTGGTCTGGGGAGCCT	59.957	20	234	124	357	CCAGGCTGGTTTGGTCTTAAC	60.889	21	GGTCTGGGGAGCCTTTATGT	60.328	20	228	124	351
TR32194_c0_g1	TTTCTGCAACTTCCTTTGCC	60.365	20	CGCTTGTCAGTTGAAACGAA	60.027	20	166	30	195	TTTCTGCAACTTCCTTTGCC	60.365	20	AAGACCCACGCTTGTCAGTT	59.769	20	174	30	203	GCAACTTCCTTTGCCGAAT	60.207	19	CGCTTGTCAGTTGAAACGAA	60.027	20	161	35	195
TR50771_c2_g2	GCCACAACAACATCAAATGC	59.979	20	CAGGGGATTGTGGTAGAGGA	59.92	20	263	4198	4460	CTCATGCTTTGCCTCAACAA	59.988	20	CAGGCTGGCTAACAAATGGT	60.132	20	129	4233	4361	GCCACAACAACATCAAATGC	59.979	20	CAGGCTGGCTAACAAATGGT	60.132	20	164	4198	4361
TR51473_c0_g1	ATGAAAGCGACATCCCAAAC	59.939	20	TCTGACCGCCATAGCCTAAC	60.235	20	246	377	622	ATGAAAGCGACATCCCAAAC	59.939	20	GTCTGACCGCCATAGCCTAA	60.235	20	247	377	623	ATGAAAGCGACATCCCAAAC	59.939	20	GCCATAGCCTAACACGCAAC	60.667	20	239	377	615
TR51473_c0_g1	CTACGACCACGGACTGTGAA	59.745	20	CGAATTGGGCCTGATATGAC	60.296	20	144	929	1072	ATTTTCTGACCAGCGTTTGC	60.257	20	CGAATTGGGCCTGATATGAC	60.296	20	203	870	1072	CTACGACCACGGACTGTGAA	59.745	20	TTTTCGAATTGGGCCTGATA	60.395	20	148	929	1076
TR51473_c0_g1	GTAAAGCGAGACCATGCCTT	59.34	20	CCCACGCAATAAAGGTGTCT	59.993	20	244	1138	1381	GGGTTTAAGCGTAAAGCGAG	59.033	20	CCCACGCAATAAAGGTGTCT	59.993	20	254	1128	1381	TTTAAGCGTAAAGCGAGACCA	60.027	21	CCCACGCAATAAAGGTGTCT	59.993	20	251	1131	1381
TR39112_c0_g1	TTCCTTCCTTTGGGTGACTC	59.112	20	CACAGTTGTCCTTCCCACCT	60.002	20	248	916	1163	TCCTTCCTTTGGGTGACTCTT	60.096	21	CACAGTTGTCCTTCCCACCT	60.002	20	247	917	1163	TTCCTTCCTTTGGGTGACTCT	60.096	21	CACAGTTGTCCTTCCCACCT	60.002	20	248	916	1163
TR51786_c3_g9	TCCAAGCTGCTTTTTGTGTG	60.027	20	CAGAAAACCGTACCGGACAT	59.853	20	242	1098	1339	AGCTGCTTTTTGTGTGGCTT	60.059	20	CAGAAAACCGTACCGGACAT	59.853	20	238	1102	1339	AAGCTGCTTTTTGTGTGGCT	60.059	20	CAGAAAACCGTACCGGACAT	59.853	20	239	1101	1339
TR55448_c2_g1	GCAACACCCTTAGCAACCAT	60	20	GTCCTCTTCACTCACGCTCC	59.993	20	222	477	698	GCAACACCCTTAGCAACCAT	60	20	GGAATGCGTCCTCTTCACTC	59.81	20	229	477	705	CTTCTTGGATCCCTTGCTTG	59.807	20	GTCCTCTTCACTCACGCTCC	59.993	20	241	458	698
TR16786_c0_g1	AGATGTATGCTTCGAACGGC	60.243	20	CGTTGAGGGTGTTGTTGTTG	60.041	20	261	442	702	CACCATCAACACCCTCAACA	60.416	20	CCGAAGGACCGATTTCAATA	59.894	20	270	608	877	CAACACCATCAACACCCTCA	60.416	20	CCGAAGGACCGATTTCAATA	59.894	20	273	605	877
TR6587_c11_g1	AAATTTGCATGCTGATCTTGA	58.375	21	AGCACTTGACAATACGTGCG	59.935	20	274	116	389	TGCGACCAGTGTAGATCCAG	59.855	20	TCCTGCTTCATCATTTTACATCA	59.6	23	245	84	328	GGGTTTTACATGCAACATCAT	57.348	21	AGCACTTGACAATACGTGCG	59.935	20	208	182	389
TR34439_c0_g1	TCAGAACCAGACACCAGCAG	60.022	20	TTCTGCATTCACATTTCCGA	60.197	20	280	332	611	AGACACCAGCAGCCTTCATT	59.874	20	TTCTGCATTCACATTTCCGA	60.197	20	272	340	611	GACACCAGCAGCCTTCATTT	60.263	20	TTCTGCATTCACATTTCCGA	60.197	20	271	341	611
TR15729_c1_g2	TGGCTTTTGCTAACAGTGACA	59.521	21	AACTGCACCAAGGCTACATTC	59.256	21	207	458	664	TGGCTTTTGCTAACAGTGACA	59.521	21	AAATGTAAACTGCACCAAGGC	59.148	21	214	458	671	TGGCTTTTGCTAACAGTGACA	59.521	21	CTGCACCAAGGCTACATTCT	57.98	20	205	458	662
TR7648_c1_g1	ATCAGCCAAACGGAGAAAAA	59.685	20	GGCCATGTCCGATATTTGTT	59.651	20	268	1338	1605	TGGTATATCAGCCAAACGGA	58.991	20	GGCCATGTCCGATATTTGTT	59.651	20	274	1332	1605	TGGTATATCAGCCAAACGGAG	59.967	21	GGCCATGTCCGATATTTGTT	59.651	20	274	1332	1605
TR55951_c0_g1	GCACGAAAAAGCAAGGAATC	59.829	20	ATCTGGATCTACGCTGGTCG	60.24	20	156	1339	1494	GCACGAAAAAGCAAGGAATC	59.829	20	GATCTACGCTGGTCGGACAC	60.688	20	151	1339	1489	AACATTGCACGAAAAAGCAA	59.349	20	ATCTGGATCTACGCTGGTCG	60.24	20	162	1333	1494
TR11142_c0_g1	GAGACCGGTTTCCAATCTCA	60.05	20	TTGTGCTTTGTTTTGTTGCTG	59.942	21	226	5	230	AACCTTGGCACCAGGTAATG	59.853	20	TTGTGCTTTGTTTTGTTGCTG	59.942	21	199	32	230	GAGACCGGTTTCCAATCTCA	60.05	20	GGGTTGAACGAAAAACCGT	59.822	19	270	5	274
TR2979_c0_g1	TTGGGTATGAAGCCGAAAAC	59.938	20	GCAGGAACGGTTAGTACCCA	59.993	20	280	539	818	GGGTATGAAGCCGAAAACAT	58.906	20	GCAGGAACGGTTAGTACCCA	59.993	20	278	541	818	TGCTAGAAGATGAGATGGGGA	59.782	21	ACATTCTCAGCAGCCGTTCT	60.02	20	202	668	869
TR23259_c2_g2	CCGGTACATCACGGAAAGTT	59.853	20	GCCTTCACCTTCATAGCCAA	60.214	20	196	1188	1383	CCGGTACATCACGGAAAGTT	59.853	20	ACCATCCAGATTGCCTCAGT	59.535	20	155	1188	1342	CCGGTACATCACGGAAAGTT	59.853	20	TCCAGATTGCCTCAGTCAGA	59.499	20	151	1188	1338
TR8226_c0_g1	AGCCAAGGAATTCAATCCAG	59.126	20	TCGAAGGTTTGTATTTGCCC	59.938	20	199	845	1043	TGCTAAGAGGAAACAGGCCA	60.904	20	TCGAAGGTTTGTATTTGCCC	59.938	20	236	808	1043	CTAAGAGGAAACAGGCCAGC	59.077	20	TCGAAGGTTTGTATTTGCCC	59.938	20	234	810	1043
TR13829_c0_g1	AATTCAGCCAATCAGATGCC	60.043	20	TCACCCCCACCCTCTTAAAT	60.549	20	145	34	178	AATTCAGCCAATCAGATGCC	60.043	20	TGTCATGCAAAGGAGCACAC	60.885	20	166	34	199	AATTCAGCCAATCAGATGCC	60.043	20	GTGTCATGCAAAGGAGCACA	60.885	20	167	34	200
TR21327_c1_g1	TGGATAATGAGGGGTGGGTA	60.006	20	GCTTCTGTTTGGAGGCTGTC	59.997	20	176	612	787	TGAGGGGTGGGTACAAGGTA	60.224	20	GCTTCTGTTTGGAGGCTGTC	59.997	20	169	619	787	GGATCTTGATTGGCCAGAAG	59.629	20	GCTTCTGTTTGGAGGCTGTC	59.997	20	211	577	787
TR36234_c0_g1	GTTTTCCAGTGATTTGCAGG	58.201	20	CATAAGCGGCATATCCATGA	59.501	20	264	679	942	TTTTCCAGTGATTTGCAGGT	58.201	20	CGGCATATCCATGAATGAAA	59.333	20	257	680	936	GTTTTCCAGTGATTTGCAGG	58.201	20	CGGCATATCCATGAATGAAA	59.333	20	258	679	936
TR29864_c6_g5	TAGATCCAGATCAGCCCCAC	60.034	20	AACCTGACTCGGCATTTTTG	60.11	20	270	1	270	GTAGATCCAGATCAGCCCCA	60.034	20	AACCTGACTCGGCATTTTTG	60.11	20	271	0	270	TAGATCCAGATCAGCCCCAC	60.034	20	AAAAGAAACCTGACTCGGCA	59.853	20	276	1	276
TR49033_c0_g1	GACGATTCGTGTTGGCTTTC	60.646	20	CAAATAGGGGTCAGAGCGAA	60.206	20	210	543	752	GACGATTCGTGTTGGCTTTC	60.646	20	GCCAGTTTTCGTCGGTTTAG	59.747	20	244	543	786	GACGATTCGTGTTGGCTTTC	60.646	20	GGGGTCAGAGCGAAGTTGTA	60.255	20	204	543	746
TR17655_c0_g1	TTTGCACTGTCGTTCAACTAA	57.087	21	AGCCTACGAATTCAGCTCCA	59.978	20	242	850	1091	TTTGCACTGTCGTTCAACTAA	57.087	21	GCCTACGAATTCAGCTCCAC	59.843	20	241	850	1090	ATTTGCACTGTCGTTCAACTAA	57.51	22	AGCCTACGAATTCAGCTCCA	59.978	20	243	849	1091
TR55776_c0_g1	TTCAGTAAACTTTTGCCGGG	60.103	20	CCTGCCAAGGGAGATAATGA	60.029	20	267	725	991	TCAGCAGCTGCAATCAGAGT	59.887	20	CCTGCCAAGGGAGATAATGA	60.029	20	242	750	991	CAGCAGCTGCAATCAGAGTC	59.887	20	CCTGCCAAGGGAGATAATGA	60.029	20	241	751	991
TR55753_c0_g1	GATACCATTTCCCATGACGC	60.163	20	AATGGTTGTTCAGAGGCAGC	60.263	20	100	173	272	AGATACCATTTCCCATGACGC	61.087	21	AATGGTTGTTCAGAGGCAGC	60.263	20	101	172	272	GATACCATTTCCCATGACGC	60.163	20	AAATGGTTGTTCAGAGGCAG	57.797	20	101	173	273
TR35336_c1_g1	TTGGCCATAAAAACCGTCAT	60.188	20	TCAGTGGACAAACTGCATTGA	60.294	21	188	3046	3233	TGGCCATAAAAACCGTCATT	60.188	20	TCAGTGGACAAACTGCATTGA	60.294	21	187	3047	3233	GCAAAAAGCTTGGCCATAAA	60.205	20	TCAGTGGACAAACTGCATTGA	60.294	21	197	3037	3233
TR15506_c0_g1	ACAAACAACAGTTGCCATCG	59.615	20	AAATCCTGGCACATAGCACC	59.962	20	236	2426	2661	ACAAACAACAGTTGCCATCG	59.615	20	ACGGTAATGTTGGGATTTGG	59.546	20	181	2426	2606	GTTGCCATCGGGACAAGTTA	60.894	20	AAATCCTGGCACATAGCACC	59.962	20	226	2436	2661
TR17297_c3_g1	TCCAAATGGCGATAAGATCC	59.862	20	TATCATTCCAGCCTGCACAC	59.679	20	239	182	420	TCCAAATGGCGATAAGATCC	59.862	20	AGCCTGCACACTGGATACAA	59.318	20	230	182	411	TCCAAATGGCGATAAGATCC	59.862	20	ATATCATTCCAGCCTGCACA	59.105	20	240	182	421
TR23392_c0_g1	AATACTGCGCTCTCCCCTCT	60.37	20	TGGTACTCTTTACCGCGGAC	60.132	20	212	920	1131	AATACTGCGCTCTCCCCTCT	60.37	20	CGGACGACAAGTATGCAAGA	59.864	20	197	920	1116	AATACTGCGCTCTCCCCTCT	60.37	20	TACTCTTTACCGCGGACGAC	60.27	20	209	920	1128
TR43133_c0_g1	GTGGAGGAGGTGGGGGAG	62.92	18	CTGCTAGGTGTGGCTGATGA	60.008	20	211	6	216	GTGGAGGAGGTGGGGGAG	62.92	18	ACCTGCTAGGTGTGGCTGAT	59.751	20	213	6	218	GTGGAGGAGGTGGGGGAG	62.92	18	ACCGTGTTGGGCAGTGTTAT	60.299	20	154	6	159
TR21421_c0_g1	TGTTGCAACCATCACTAGTTCC	60.037	22	GATCAAGTCTGCAAATGCCA	59.805	20	241	431	671	TGTTGCAACCATCACTAGTTCC	60.037	22	TGATCAAGTCTGCAAATGCC	59.805	20	242	431	672	TTGCAACCATCACTAGTTCCTG	60.168	22	TGATCAAGTCTGCAAATGCC	59.805	20	240	433	672
TR47858_c0_g1	TGGATGGAAAACGTGCAATA	59.93	20	AGGGTCGATTTCATCACCAC	59.786	20	202	557	758	AGCATTGCCAGACAATTTGA	59.276	20	AGGGTCGATTTCATCACCAC	59.786	20	240	519	758	TGGATGGAAAACGTGCAATA	59.93	20	TAGGGTCGATTTCATCACCA	58.923	20	203	557	759
TR14835_c0_g1	CACCAGTAATTCCCTTTGCAG	59.618	21	CCTTATTGTTCTTGCTGCCTG	59.89	21	228	929	1156	AAGATGGGAAGATAGGCGAA	58.74	20	GGCAACATGTTTATCGCTCTT	59.242	21	238	1065	1302	TTCCCTTTGCAGTAAGTGGAAT	60.001	22	CCTTATTGTTCTTGCTGCCTG	59.89	21	219	938	1156
TR57045_c1_g1	TGGACAGGTAAAGCTGAAACAA	59.785	22	CACTAAGCAATTAAGGGGCG	59.736	20	250	2072	2321	CAATTCAGGGAAATATATGGGG	59.42	22	CACTAAGCAATTAAGGGGCG	59.736	20	222	2100	2321	TGGACAGGTAAAGCTGAAACA	58.418	21	CACTAAGCAATTAAGGGGCG	59.736	20	250	2072	2321
TR54545_c0_g1	TGGTGAGATTCATCTTCGGA	59.166	20	GGGGTTCGAACTCAGACTTG	59.697	20	218	373	590	TGGTGAGATTCATCTTCGGA	59.166	20	TTGGGGTTCGAACTCAGACT	59.697	20	220	373	592	TGGTGAGATTCATCTTCGGAC	60.065	21	GGGGTTCGAACTCAGACTTG	59.697	20	218	373	590
TR25511_c0_g1	ACTTTCGTGGGTTACGATGG	59.853	20	AAAAGTTCGTGGTTTTCGGA	59.587	20	156	2353	2508	ACTTTCGTGGGTTACGATGG	59.853	20	TTTCTTAGGTGCACACAGGC	58.926	20	258	2353	2610	ACTTTCGTGGGTTACGATGG	59.853	20	CTTAGGTGCACACAGGCGT	59.913	19	255	2353	2607
TR9801_c0_g2	CTTGCGAAGTGAAGGAAAGG	59.986	20	TGGTCCCACAGACTTTGTCA	60.129	20	262	539	800	GTAGGCTTGCGAAGTGAAGG	60.015	20	TGGTCCCACAGACTTTGTCA	60.129	20	267	534	800	CTTGCGAAGTGAAGGAAAGG	59.986	20	TTTGTGGGCCAAAACTAACC	59.839	20	236	539	774
TR39267_c2_g2	GGCCTCAACATTGGTGGTAT	59.676	20	GGCGTAAAGGGTTGAAATGA	59.938	20	218	1508	1725	AGGCCTCAACATTGGTGGTA	60.375	20	GGCGTAAAGGGTTGAAATGA	59.938	20	219	1507	1725	TTTCAGGCCTCAACATTGGT	60.495	20	GGCGTAAAGGGTTGAAATGA	59.938	20	223	1503	1725
TR28711_c0_g1	GCATTACCTGAAGCATACAAAA	57.061	22	GCTCTGAAATGACTGGAGCA	59.116	20	183	16	198	GCATTACCTGAAGCATACAAAA	57.061	22	TGCTCTGAAATGACTGGAGC	59.116	20	184	16	199	AGCATTACCTGAAGCATACAAAA	58.044	23	GCTCTGAAATGACTGGAGCA	59.116	20	184	15	198
TR15162_c0_g1	TTCAAATACCGATTTATTCCAAA	57.668	23	GGAAGCAGACCAACCAAAAC	59.574	20	276	63	338	ATTCAAATACCGATTTATTCCAAA	58.001	24	GGAAGCAGACCAACCAAAAC	59.574	20	277	62	338	TTCAAATACCGATTTATTCCAAAT	58.001	24	GGAAGCAGACCAACCAAAAC	59.574	20	276	63	338
TR55751_c1_g1	TCCCTTTCTCGCTGCATAGT	59.978	20	CCTTACCTGTAGACCCGGAA	59.049	20	228	1085	1312	TGCTAAATCCCCATCTCCTG	60.029	20	CCTTACCTGTAGACCCGGAA	59.049	20	138	1175	1312	ATCCTAAAACGTCTGCCCCT	59.962	20	CCTTACCTGTAGACCCGGAA	59.049	20	247	1066	1312
TR33477_c0_g1	AATGCTCCCCTAGCCTTCTC	59.811	20	TATCAGGCAACAATGTCCCA	59.924	20	141	406	546	AATGCTCCCCTAGCCTTCTC	59.811	20	CTAATGCCCCTTCTGCGATA	60.188	20	271	406	676	AATGCTCCCCTAGCCTTCTC	59.811	20	ATGAGGCCTGTCTTGGACAT	59.535	20	248	406	653
TR20930_c1_g1	CTTTGCATTGAGCAAACCTG	59.464	20	CCATACACCCCGACAACTCT	59.844	20	224	1879	2102	CTTTGCATTGAGCAAACCTG	59.464	20	GGTTCCCCGATTCTAGCTCT	59.674	20	154	1879	2032	CTTTGCATTGAGCAAACCTG	59.464	20	AGCCCCATAAATCCTGACAA	59.387	20	272	1879	2150
TR57063_c0_g2	GTTCTTGTTGGAGGCCCATA	59.933	20	GGAGAAAGGGTGGTGATTGA	59.903	20	164	1087	1250	GGGCATCAGCATAGGTGACT	60.104	20	GGAGAAAGGGTGGTGATTGA	59.903	20	265	986	1250	AGCTTGCCCGAGATGATAAA	59.807	20	GGAGAAAGGGTGGTGATTGA	59.903	20	208	1043	1250
TR14603_c0_g1	TCATCGGACCGTCATAGTCA	60.072	20	ACGACCTCCATCACAAGGTC	59.969	20	227	463	689	TCATCGGACCGTCATAGTCA	60.072	20	CTCCATCACAAGGTCAGGGT	59.962	20	222	463	684	TCATCGGACCGTCATAGTCA	60.072	20	ACCTCCATCACAAGGTCAGG	59.962	20	224	463	686
TR14787_c1_g1	CTGACCACGAGATGGGACTT	60.112	20	TTAATAGTCAACGGCCACCC	59.823	20	175	1271	1445	TTCGACGGGGTTTAAATCAA	60.294	20	TTAATAGTCAACGGCCACCC	59.823	20	157	1289	1445	ATTCTGACCACGAGATGGGA	60.475	20	TTAATAGTCAACGGCCACCC	59.823	20	178	1268	1445
TR13081_c1_g1	ACTGCTTTGATGTGAGGGCT	59.874	20	TGCGGCTTATACATGAGTGC	59.862	20	261	946	1206	GGTTGCCCATTGGATGTAAG	60.192	20	TGCGGCTTATACATGAGTGC	59.862	20	225	982	1206	GCTTTGATGTGAGGGCTGAT	60.226	20	TGCGGCTTATACATGAGTGC	59.862	20	258	949	1206
TR34471_c0_g1	GATTCACATGTTTGTGTTGGG	58.736	21	TAGCATGTCTGCCTTTGAGC	59.178	20	217	986	1202	GATTCACATGTTTGTGTTGGGT	59.621	22	TAGCATGTCTGCCTTTGAGC	59.178	20	217	986	1202	TTGGGTATAAATGCTCCCTG	57.579	20	TAGCATGTCTGCCTTTGAGC	59.178	20	201	1002	1202
TR25862_c0_g1	CAGTTTGCAGAAACAAGCCA	60.027	20	AGTGTTCGAACCAGACAGGG	60.151	20	154	1525	1678	CAGTTTGCAGAAACAAGCCA	60.027	20	AGGAAGTGCTGCGACCTCTA	60.156	20	173	1525	1697	CAGTTTGCAGAAACAAGCCA	60.027	20	GATAAGGAAGTGCTGCGACC	59.843	20	177	1525	1701
TR10598_c0_g1	TCTTCATAAAACCCATGCGA	59.112	20	GGGTTCACTGAATGACAGCA	59.682	20	209	542	750	TTCATAAAACCCATGCGAAA	59.004	20	GGGTTCACTGAATGACAGCA	59.682	20	207	544	750	CTTCATAAAACCCATGCGAAA	59.95	21	GGGTTCACTGAATGACAGCA	59.682	20	208	543	750
TR10598_c0_g1	CCATTTTCAAATGTGACCTTCA	59.839	22	TGCAGACTTTTCTTACGGGTC	59.369	21	233	1049	1281	CCATTTTCAAATGTGACCTTCA	59.839	22	GCAGACTTTTCTTACGGGTCA	59.369	21	232	1049	1280	CCATTTTCAAATGTGACCTTCA	59.839	22	TTGCAGACTTTTCTTACGGG	58.027	20	234	1049	1282
TR57425_c0_g1	CTGAAGCTCTGCCTGCTTCT	60.035	20	AACTGCCGTCGGTGTTTTAC	60.037	20	202	4713	4914	GAAGCTTTTGCTGCTCTGCT	60.044	20	AACTGCCGTCGGTGTTTTAC	60.037	20	176	4739	4914	AGAAGCTTTTGCTGCTCTGC	60.044	20	AACTGCCGTCGGTGTTTTAC	60.037	20	177	4738	4914
TR4320_c0_g1	CATGTTTTCAATGCAGCACC	60.119	20	CAGCGTTGTTGATTTAGGCA	59.872	20	243	2155	2397	ATGCAGCACCCGAAAACTAA	60.637	20	CAGCGTTGTTGATTTAGGCA	59.872	20	233	2165	2397	AATGCAGCACCCGAAAACTA	60.637	20	CAGCGTTGTTGATTTAGGCA	59.872	20	234	2164	2397
TR9072_c0_g1	TGGTCGGAAATCCGAATAAA	60.26	20	ATCAGGGAACGTTCAAATGC	59.939	20	229	5197	5425	TGGTCGGAAATCCGAATAAA	60.26	20	CTTTTGACCCAATCAGGGAA	59.903	20	240	5197	5436	GGTGATTAAGGCAGAGTCGG	59.694	20	ATCAGGGAACGTTCAAATGC	59.939	20	147	5279	5425
TR52353_c0_g2	GAAGTGAAGGTGAAACGGGA	60.088	20	AGAGCTTGAAGAATCGCCAC	59.579	20	138	1655	1792	GTGAAGGTGAAACGGGAGAA	60.088	20	AGAGCTTGAAGAATCGCCAC	59.579	20	135	1658	1792	GTGAAGGTGAAACGGGAGAA	60.088	20	GAGCTTGAAGAATCGCCACT	59.579	20	134	1658	1791
TR14949_c0_g1	CGCTTTTAACTTCAATCTAGCAA	58.003	23	TCATAAGTGGAGGAGGTGCC	60.073	20	155	6	160	AACGCTTTTAACTTCAATCTAGCAA	59.883	25	TCATAAGTGGAGGAGGTGCC	60.073	20	157	4	160	AAACGCTTTTAACTTCAATCTAGCA	59.883	25	TCATAAGTGGAGGAGGTGCC	60.073	20	158	3	160
TR47558_c0_g1	GTTGTTCTGCCACCACCTTT	60.012	20	AATACGAAGCCGTCCCCTAT	59.82	20	224	1764	1987	TGGTGCATGTGATCCTGAAT	59.925	20	GGGGCACTTCTCAGTGACAT	60.12	20	183	1886	2068	ATTGGTGCATGTGATCCTGA	59.925	20	AATACGAAGCCGTCCCCTAT	59.82	20	104	1884	1987
TR9753_c0_g1	AGCCAAGGACACGAAAGATG	60.255	20	AGCTCAACTGATTCCTCCGA	59.95	20	273	2051	2323	ATTCCCATGATGAAGCCAAG	59.894	20	TTCCTCCGAACTGTCCTTTG	60.224	20	275	2038	2312	GAAGCCAAGGACACGAAAGA	60.375	20	AGCTCAACTGATTCCTCCGA	59.95	20	275	2049	2323
TR26626_c0_g1	GGTGGATTTGTTTGGGAATG	60.029	20	ATTTGGGCACAGCAGAAAAT	59.574	20	269	747	1015	GGTGGATTTGTTTGGGAATG	60.029	20	TTTTGTTGATTTGGGCACAG	59.561	20	277	747	1023	GGTGGATTTGTTTGGGAATG	60.029	20	GCTTTTGTTGATTTGGGCAC	60.49	20	279	747	1025
TR26626_c0_g1	TGAACAAACTAAGCCCCCTG	60.103	20	CTGCCTTTGTGACTGGTTCA	59.873	20	203	1092	1294	TGAACAAACTAAGCCCCCTG	60.103	20	TGCCTTTGTGACTGGTTCAG	59.873	20	202	1092	1293	TGAACAAACTAAGCCCCCTG	60.103	20	CAAAGCTGCTGACGAAAACA	60.172	20	127	1092	1218
TR26626_c0_g1	AAGAAGGCGATGACGAAAGA	59.955	20	GATCATCAACAACGTCCGTG	59.967	20	256	1408	1663	AAGAAACCCAAGAAGGCGAT	60.074	20	GATCATCAACAACGTCCGTG	59.967	20	265	1399	1663	AAGAAACCCAAGAAGGCGAT	60.074	20	TCCGTGGTTCCATTCTTTTC	59.91	20	251	1399	1649
TR39219_c0_g1	CCAACATCCTTTACACCAATG	57.865	21	GCAAACAGGTCCCAAGGTTA	59.971	20	225	15	239	CCAACATCCTTTACACCAATGT	58.743	22	GCAAACAGGTCCCAAGGTTA	59.971	20	225	15	239	ACCAACATCCTTTACACCAATG	58.743	22	GCAAACAGGTCCCAAGGTTA	59.971	20	226	14	239
TR39219_c0_g1	TAGCAAAGGAGCAATTGGGA	60.712	20	CCCTTGATATGCAGCCAAAG	60.597	20	265	306	570	TAGCAAAGGAGCAATTGGGA	60.712	20	AGTCCCTTGATATGCAGCCA	60.624	20	268	306	573	ATAGCAAAGGAGCAATTGGG	59.182	20	CCCTTGATATGCAGCCAAAG	60.597	20	266	305	570
TR39219_c0_g1	ACTTGCCACACATGGAACAA	60.008	20	AGAACTTTGGGCACTGAGGA	59.844	20	224	855	1078	ACTTGCCACACATGGAACAA	60.008	20	GAACTTTGGGCACTGAGGAC	59.703	20	223	855	1077	CTTGCCACACATGGAACAAA	60.552	20	AGAACTTTGGGCACTGAGGA	59.844	20	223	856	1078
TR50603_c0_g1	CATCTTCTGCGGGGTGAT	59.585	18	TCATCACTCGGGGAGCTACT	59.827	20	156	1	156	TCATCTTCTGCGGGGTGAT	61.603	19	TCATCACTCGGGGAGCTACT	59.827	20	157	0	156	CATCTTCTGCGGGGTGAT	59.585	18	CCAGGTTGGGTGGTTATTGT	59.569	20	186	1	186
TR38220_c0_g4	GGTGCTTAACAGACTTCGGC	59.882	20	TACCATGCAATTCCACCTCA	59.924	20	180	106	285	GGTGCTTAACAGACTTCGGC	59.882	20	CTTTGTACCCCGCAGAAGAG	59.869	20	241	106	346	GGTGCTTAACAGACTTCGGC	59.882	20	AAGCAGAGGTGGAAGGATCA	59.803	20	264	106	369
TR38220_c0_g4	TTCTCCTCGTCTCTACTGCCA	60.141	21	GCTGTGGAACAACAGCTCAA	60.032	20	269	1234	1502	GTCAGGCAGGAAACTGGTGT	60.159	20	TGCTCATCAAAGAAAGGGAGA	59.94	21	278	1152	1429	TGTCCACATCGGGATTCATA	59.732	20	TGCTCATCAAAGAAAGGGAGA	59.94	21	261	1169	1429
TR26815_c6_g2	CACTGGTTCTTTCGGGTTGT	60.005	20	AGTGTCCCAGGCATTCTGTT	59.579	20	164	669	832	CACTGGTTCTTTCGGGTTGT	60.005	20	AAGTGTCCCAGGCATTCTGT	59.579	20	165	669	833	CACTGGTTCTTTCGGGTTGT	60.005	20	ACAAGTGTCCCAGGCATTCT	59.579	20	167	669	835
TR38304_c5_g1	GCTTCCGTTCTTCTGCTGTC	60.142	20	GAGGAGGAGGAAGAGGGAGA	59.883	20	277	321	597	CAACCGACATAGTGCTGGTG	60.175	20	GAGGAGGAGGAAGAGGGAGA	59.883	20	208	390	597	CAACCGACATAGTGCTGGTG	60.175	20	GACGATGATGAGGAGGAGGA	60.16	20	220	390	609
TR710_c0_g2	TTTTCCGGTAATGGAGTTCG	59.931	20	CATGCTAAGTGGGAGGCTGT	60.277	20	188	514	701	TTTTCCGGTAATGGAGTTCG	59.931	20	ACATGCTAAGTGGGAGGCTG	60.277	20	189	514	702	TTTTCCGGTAATGGAGTTCG	59.931	20	GCTAAGTGGGAGGCTGTCAA	60.397	20	185	514	698
TR32238_c0_g2	CGCGAACATAATTGTGTAAATTG	59.458	23	ACACGCCATAAAAGCATACAT	57.234	21	260	1836	2095	TGTGATCAATTTTAACTTTCTGCTG	59.727	25	CAGATCAAAAGTGCAGATCCAG	59.875	22	225	1929	2153	TTGCTTGAAATTGTTATTTGATGA	58.72	24	CAGATCAAAAGTGCAGATCCAG	59.875	22	253	1901	2153
TR20673_c0_g2	CATGCATGCAGGGTATTAAA	57.143	20	TCCCCTTGAAAACTTGACAAA	59.573	21	184	225	408	CATGCATGCAGGGTATTAAA	57.143	20	TGAACACTTTCCCCTTGAAAA	59.573	21	193	225	417	CATGCATGCAGGGTATTAAA	57.143	20	TTGAACACTTTCCCCTTGAAA	59.573	21	194	225	418
TR55485_c0_g1	TGGAGGAGAAACATCAAAAATTG	60.33	23	TCAGCAATTTCCTAGCACAAAA	59.89	22	279	828	1106	TGGAGGAGAAACATCAAAAATTG	60.33	23	TTCAGCAATTTCCTAGCACAAA	59.89	22	280	828	1107	TGGAGGAGAAACATCAAAAATTG	60.33	23	TCAGCAATTTCCTAGCACAAA	58.57	21	279	828	1106
TR2732_c0_g1	GGTGATGTTGTCGTTGTTGC	60.016	20	TCTACAGCCTTCCTGGTGCT	60.012	20	214	868	1081	GGTGATGTTGTCGTTGTTGC	60.016	20	CTCTACAGCCTTCCTGGTGC	60.012	20	215	868	1082	GTTGTCGTCATCGTTGTTGC	60.168	20	TCTACAGCCTTCCTGGTGCT	60.012	20	151	931	1081
TR20091_c0_g1	GGAAACTTCGGAGGATAGGC	60.039	20	CGCATCTAACAAATCCGACA	59.688	20	271	408	678	ATCAAGCCGTTGAGAAGCAT	59.843	20	CGCATCTAACAAATCCGACA	59.688	20	134	545	678	AGGATAGGCTTTCGGCAACT	60.228	20	CGCATCTAACAAATCCGACA	59.688	20	260	419	678
TR23220_c2_g2	TGAGTTGGGCTCAATCAGAA	59.369	20	GCCAAGATGAAAACCTGCAT	60.081	20	260	390	649	TGAGTTGGGCTCAATCAGAA	59.369	20	TTTGCATGGTTTACTGCCAA	60.111	20	275	390	664	TGAGTTGGGCTCAATCAGAA	59.369	20	TGCATGGTTTACTGCCAAGA	60.257	20	273	390	662
TR46219_c0_g1	GCACAAAGAACCCAGGAGAG	59.844	20	CTCCTCCGGAACATCCTCTT	60.586	20	234	725	958	AACAAGGGACGCTACTCCAG	59.353	20	TTCGGTTCCTTGATTTCTGC	60.192	20	264	754	1017	ACAACAAGGGACGCTACTCC	59.212	20	TTCGGTTCCTTGATTTCTGC	60.192	20	266	752	1017
TR46219_c0_g1	TGTACACACTGTCCAGCCAGA	60.364	21	ACTTCACAGCTTTGCAGCCT	60.201	20	259	3175	3433	CACACTGTCCAGCCAGATAGG	60.717	21	ACTTCACAGCTTTGCAGCCT	60.201	20	255	3179	3433	CTGTACACACTGTCCAGCCA	58.263	20	ACTTCACAGCTTTGCAGCCT	60.201	20	260	3174	3433
TR23928_c1_g1	GCATGTCTGTTTCTCAGCCA	59.992	20	ACATGTTAGGGTCAGCCTGG	59.989	20	249	13428	13676	GCATGTCTGTTTCTCAGCCA	59.992	20	AGGAAGGGTCTGGTCCTTGT	59.968	20	219	13428	13646	GCATGTCTGTTTCTCAGCCA	59.992	20	TGGAAACCTGTGAAGGAAGG	60.081	20	232	13428	13659
TR40392_c2_g2	GCAGGGTTAGGGTTAGGGTT	59.348	20	CAACTGTCACAGAAGGCACC	59.31	20	205	23	227	AGGGTTAGGGTTAGCAGGGT	58.988	20	CAACTGTCACAGAAGGCACC	59.31	20	197	31	227	AGCAGGGTTAGGGTTAGGGT	58.988	20	CAACTGTCACAGAAGGCACC	59.31	20	206	22	227
TR40392_c2_g2	AACATGGACATCCCATTAAAAA	58.225	22	AAAATGGCATGGTGCTTAAA	58.161	20	173	1142	1314	CTTCTAACATGGACATCCCATT	57.929	22	AAAATGGCATGGTGCTTAAA	58.161	20	178	1137	1314	ACTTCTAACATGGACATCCCATT	58.772	23	AAAATGGCATGGTGCTTAAA	58.161	20	179	1136	1314
TR36207_c1_g1	CAGGAAATTACGCCTCTCCA	60.206	20	TTTGCCAAAATGTCCAAAAA	59.026	20	162	529	690	ACGCCTCTCCAGATGAAATG	60.218	20	TTTGCCAAAATGTCCAAAAA	59.026	20	153	538	690	CAGGAAATTACGCCTCTCCA	60.206	20	GAAGTTTGCCAAAATGTCCAA	59.967	21	166	529	694
TR26169_c0_g1	TGCACCACAACAGCAAGAAT	60.31	20	CAGCGCTAGCAGACGTAATG	59.799	20	264	466	729	GTTTGCACCACAACAGCAAG	60.347	20	CAGCGCTAGCAGACGTAATG	59.799	20	267	463	729	AGCGATGATGCTGGAGTTTC	60.37	20	CAGCGCTAGCAGACGTAATG	59.799	20	244	486	729
TR39453_c0_g1	GTTCCAGTGCTAGAAGGCGT	59.501	20	GATTGGGATTCGGATGAATG	60.096	20	277	1515	1791	GTTCCAGTGCTAGAAGGCGT	59.501	20	CCTCATTGGTGCCTGTTCTT	60.111	20	254	1515	1768	GTTCCAGTGCTAGAAGGCGT	59.501	20	ATTGGTGCCTGTTCTTTTGC	60.118	20	250	1515	1764
TR7521_c0_g1	TGTTTTATTGGAACCCACCA	58.719	20	TGCAAAGGATTCTCGACTGA	59.522	20	246	1298	1543	TGTTTTATTGGAACCCACCAG	59.71	21	TGCAAAGGATTCTCGACTGA	59.522	20	246	1298	1543	TGTTTTATTGGAACCCACCA	58.719	20	TTGCAAAGGATTCTCGACTG	58.999	20	247	1298	1544
TR6583_c3_g1	CCAGAATTGAAATTATGCACTGA	59.133	23	GTGAGATTGTTTCGCCGTTT	60.118	20	278	8	285	CCAGAATTGAAATTATGCACTGA	59.133	23	CTCCATGGGATATGGCTGTT	59.773	20	258	8	265	CCAGAATTGAAATTATGCACTGA	59.133	23	TCTCCATGGGATATGGCTGT	60.303	20	259	8	266
TR55245_c0_g1	CGCTTTCGCAGCTTTAACTT	59.801	20	CAAAGTGCAAGCGTTTTGTC	59.512	20	240	963	1202	CGCTTTCGCAGCTTTAACTT	59.801	20	AGTGCAAGCGTTTTGTCGAT	60.837	20	237	963	1199	CCCATCGTGTAACCGTCAGT	60.833	20	TCTGTCTCAAAGTGCAAGCG	60.324	20	219	991	1209
TR40011_c1_g1	CAGGTCTCCCATGGAAGGTA	59.92	20	CATCTAGGGGATGACATTTGC	59.401	21	244	2600	2843	TCCCATGGAAGGTAAAACCA	60.162	20	CATCTAGGGGATGACATTTGC	59.401	21	238	2606	2843	CTGGATCAAAGCAGGTCTCC	59.803	20	CATCTAGGGGATGACATTTGC	59.401	21	255	2589	2843
TR46007_c0_g2	ACCCCAAAATGGGAAAATGT	60.278	20	AAAATGCCATTGAATCGGAG	59.901	20	266	2	267	ACCCCAAAATGGGAAAATGT	60.278	20	GCCATTGAATCGGAGTACCA	60.864	20	261	2	262	ACCCCAAAATGGGAAAATGT	60.278	20	TGCCATTGAATCGGAGTACC	60.864	20	262	2	263
TR2722_c0_g1	TTTGATGATTTACTGTCCTGGTG	59.007	23	AGCTGGTGAAATCAACTGGG	60.111	20	279	204	482	TTTGATGATTTACTGTCCTGGTG	59.007	23	GGTGAAATCAACTGGGGATG	60.173	20	275	204	478	TTTGATGATTTACTGTCCTGGTG	59.007	23	TGGTGAAATCAACTGGGGAT	60.173	20	276	204	479
TR32836_c5_g5	TGGCTAACACCTGGAGGAAC	60.111	20	CAATAGGTCCGTTCTTTGGC	59.569	20	268	480	747	GTGGCTAACACCTGGAGGAA	60.111	20	CAATAGGTCCGTTCTTTGGC	59.569	20	269	479	747	TTTGGATGATGAAGCAGACG	59.799	20	CAATAGGTCCGTTCTTTGGC	59.569	20	170	578	747
TR13406_c0_g1	ACTGACTTCCCTTTTGGAAGA	57.896	21	TTCGTTCCCTTTTCAGCATC	60.192	20	130	1	130	TGACTTCCCTTTTGGAAGATT	57.773	21	TTCGTTCCCTTTTCAGCATC	60.192	20	128	3	130	CTGACTTCCCTTTTGGAAGATT	58.757	22	TTCGTTCCCTTTTCAGCATC	60.192	20	129	2	130
TR44618_c0_g2	TGGATAACAAAAATGAACCCAA	59.208	22	GGAAGAATGTTCGAATGGCA	60.983	20	263	16	278	TGGATAACAAAAATGAACCCAA	59.208	22	TGGAAGAATGTTCGAATGGC	60.983	20	264	16	279	TGGATAACAAAAATGAACCCAA	59.208	22	TCTGGAAGAATGTTCGAATGG	60.059	21	266	16	281
TR7507_c0_g1	TGCATGCAATATTTTCCTGG	59.52	20	AACAGAGCGATGAAGCAGGT	60.02	20	279	449	727	TCGTTTCATTCGTTTGGACA	60.088	20	AGCCCTGATGATCGTTTTGT	59.556	20	229	424	652	CGTTTGGACAACTGTTGCAT	59.615	20	AGGTGCCAAACAACAAAAGC	60.154	20	278	434	711
TR23770_c1_g9	TTTTGTCTGCATGGGTGAAA	60.088	20	TTGCCGATACAACTGCACTC	59.871	20	202	951	1152	TTTCCAAATCGCGTAAATCC	59.907	20	TTGCCGATACAACTGCACTC	59.871	20	130	1023	1152	AGGGACCGTTTTTCCAAATC	60.166	20	TTGCCGATACAACTGCACTC	59.871	20	140	1013	1152
TR28712_c11_g6	CGACCTCATAACACGACTGG	59.161	20	GGAAGGTGGATGCTTTTTATTTT	59.755	23	147	997	1143	CGACCTCATAACACGACTGG	59.161	20	GATAGGAAGGTGGATGCTTTTT	58.65	22	151	997	1147	CGACCTCATAACACGACTGG	59.161	20	GGAAGGTGGATGCTTTTTATTT	58.566	22	147	997	1143
TR2514_c0_g1	ACCATGTGGCGGTAACAAAT	60.118	20	TCACAACACAAACTGGAACACA	60.088	22	224	3059	3282	GGTAACAAATCGCAGTGGGT	59.859	20	TCACAACACAAACTGGAACACA	60.088	22	214	3069	3282	TACCATGTGGCGGTAACAAA	59.849	20	TCACAACACAAACTGGAACACA	60.088	22	225	3058	3282
TR667_c0_g1	TGGAACCGAAAATGTTTGAA	58.987	20	GCTTCAATCGCTGAAGAACC	59.962	20	220	791	1010	TGGAACCGAAAATGTTTGAA	58.987	20	CTGTACGCTTCAATCGCTGA	60.157	20	226	791	1016	TGGAACCGAAAATGTTTGAA	58.987	20	TCTGTACGCTTCAATCGCTG	60.157	20	227	791	1017
TR25507_c50_g30	CCATGGTTACCCATTCTCCA	60.572	20	ATACAAGCAGGTGCGAAAGC	60.416	20	272	579	850	CCATGGTTACCCATTCTCCA	60.572	20	AAAAAGGCATGCTGTGTTCA	59.322	20	149	579	727	CCATGGTTACCCATTCTCCA	60.572	20	TACAAGCAGGTGCGAAAGC	60.15	19	271	579	849
TR53192_c0_g1	CGGACATAGGCACACCTTTT	59.993	20	GCAGTGATGACTCCAAGGAAG	59.859	21	270	1291	1560	CGGACATAGGCACACCTTTT	59.993	20	AGCAGTGATGACTCCAAGGAA	59.859	21	271	1291	1561	CGGACATAGGCACACCTTTT	59.993	20	GCAGTGATGACTCCAAGGAA	58.802	20	270	1291	1560
TR9369_c0_g2	ATCATCCCCAATTGATTCCA	59.952	20	AGCAAGTCAGCGGCAGTTAT	60.044	20	231	1528	1758	ATCATCCCCAATTGATTCCA	59.952	20	CTCACAGCTGCACTCTGTCC	59.764	20	108	1528	1635	TTCCAGCGACCTTCCTTAGA	59.948	20	CTCACAGCTGCACTCTGTCC	59.764	20	164	1472	1635
TR9369_c0_g2	GCACATCCGTGCTAATGAAA	59.694	20	TCTGGCAGAGACAAATTGGA	59.369	20	269	1821	2089	AGCACATCCGTGCTAATGAA	59.301	20	TCTGGCAGAGACAAATTGGA	59.369	20	270	1820	2089	GCACATCCGTGCTAATGAAA	59.694	20	CTGGCAGAGACAAATTGGAAG	59.861	21	268	1821	2088
TR29318_c0_g1	TTTTTAAGGGACGACACAAAATC	59.424	23	GCAACCAGGCATGGTATATG	58.872	20	275	57	331	TTTTTAAGGGACGACACAAAA	57.361	21	GCAACCAGGCATGGTATATG	58.872	20	275	57	331	TTTTTAAGGGACGACACAAAATC	59.424	23	GCAACCAGGCATGGTATATGT	59.728	21	275	57	331
TR30068_c1_g2	CAGGTGAACACACCACAAGG	60.039	20	TGCTGTTGCTGAAGGACTTG	60.175	20	170	6572	6741	CAGGTGAACACACCACAAGG	60.039	20	CACAACCTGACCAGTGGAGA	59.705	20	198	6572	6769	CCAGGTGAACACACCACAAG	60.039	20	CACAACCTGACCAGTGGAGA	59.705	20	199	6571	6769
TR38461_c0_g1	GCATCTCGTGAGCGTGAA	59.638	18	GGAGGGCCATATGGAAGATT	60.117	20	107	21	127	GCATCTCGTGAGCGTGAA	59.638	18	AGGAGGGCCATATGGAAGAT	59.75	20	108	21	128	CTGTTGCATCTCGTGAGCGT	62.589	20	GGAGGGCCATATGGAAGATT	60.117	20	112	16	127
TR45831_c0_g1	CGTCAACCCAGAAGAGCATT	60.255	20	AATCGATTGATTTTACGGCG	59.928	20	262	123	384	CGTCAACCCAGAAGAGCATT	60.255	20	CATTCATGCGTTGAACATCA	59.074	20	203	123	325	CGTCAACCCAGAAGAGCATT	60.255	20	TCATGCGTTGAACATCATTG	59.074	20	200	123	322
TR10452_c0_g1	GCCATTTTGTGACAATCAGC	59.131	20	AGGGTGACTCAATCAGCCAG	60.261	20	276	1632	1907	GCCATTTTGTGACAATCAGC	59.131	20	CTAATCTCCCTTGGGGCTCT	59.668	20	253	1632	1884	GCCATTTTGTGACAATCAGC	59.131	20	ACTAATCTCCCTTGGGGCTC	59.536	20	254	1632	1885
TR36048_c0_g1	GAGTGCTTAGAAAGGCCGTG	60.015	20	TTTTCATTTCCAACCGCAAT	60.302	20	221	1410	1630	TGCTTAGAAAGGCCGTGTTT	59.883	20	TTTTCATTTCCAACCGCAAT	60.302	20	218	1413	1630	AGGCCGTGTTTCATAGAACG	60.132	20	TTTTCATTTCCAACCGCAAT	60.302	20	209	1422	1630
TR28781_c0_g1	TGCGAGACGGAAAAGTTACA	59.464	20	TCAAACATGTATTCCGTTTGAAAT	59.665	24	189	1294	1482	TTACATTTCCGGTGGGTTTG	60.587	20	TCAAACATGTATTCCGTTTGAAAT	59.665	24	174	1309	1482	GTGGGTTTGAATGCCGTAAA	60.732	20	TCAAACATGTATTCCGTTTGAAAT	59.665	24	163	1320	1482
TR18811_c0_g1	GAGGTTGGTGCACCCTAGAA	60.111	20	AGGAATCGCCACACTCAAAA	60.636	20	222	2880	3101	TTGTTGAGGCAAGTGTGAGG	59.873	20	AGGAATCGCCACACTCAAAA	60.636	20	238	2864	3101	TTGAGGCAAGTGTGAGGTTG	59.873	20	AGGAATCGCCACACTCAAAA	60.636	20	235	2867	3101
TR10544_c1_g1	AGCGTCAGAAGGAAAACACG	60.431	20	TCCCTCTCTTTCTCTCTCTCTTCA	60.252	24	221	1947	2167	AGCGTCAGAAGGAAAACACG	60.431	20	CCCTCTCTTTCTCTCTCTCTTCA	58.495	23	220	1947	2166	ATTATGAGTGCTGGCAGCGT	60.827	20	TCCCTCTCTTTCTCTCTCTCTTCA	60.252	24	236	1932	2167
TR26266_c2_g1	GCTGTTGTTCCAAGTGAATGC	60.693	21	TTCAGCCCTGATTAAATGGC	60.038	20	276	591	866	GCTGTTGTTCCAAGTGAATGC	60.693	21	CAGCCCTGATTAAATGGCAC	60.469	20	274	591	864	GCTGTTGTTCCAAGTGAATGC	60.693	21	GCCCTGATTAAATGGCACAG	60.469	20	272	591	862
TR20129_c0_g1	TGTTTGCGTACGATTGGTCT	59.199	20	CAGGATCTGCACTGTTTGCT	59.037	20	257	1073	1329	GTTTGCGTACGATTGGTCTG	59.199	20	CAGGATCTGCACTGTTTGCT	59.037	20	256	1074	1329	TGTTTGCGTACGATTGGTCT	59.199	20	ACAGGATCTGCACTGTTTGCT	59.929	21	258	1073	1330
TR46208_c1_g2	CGACAAGTGTCGGGTATGTG	60.025	20	GCAAGCGGTTTCATCAATTT	60.081	20	237	767	1003	CGACAAGTGTCGGGTATGTG	60.025	20	TCAATTTCCATACGGAAGGC	59.901	20	224	767	990	CGACAAGTGTCGGGTATGTG	60.025	20	TCGTTCATAGTGACCACCGA	60.112	20	198	767	964
TR26173_c0_g1	TTCAGGGCATTAGGTCAGAGA	59.822	21	AAACCAAACCTACCCGGTTC	60.089	20	213	597	809	TTCAGGGCATTAGGTCAGAGA	59.822	21	CAAACCTACCCGGTTCAAAA	59.833	20	209	597	805	TTTTCAGGGCATTAGGTCAGA	59.693	21	AAACCAAACCTACCCGGTTC	60.089	20	215	595	809
TR41564_c2_g1	TGTTCCCTTCAGAATCCCTG	60.042	20	TGAGGATGGTGAATTGAGTGA	59.074	21	263	1637	1899	CCCTCCTCCTCAAAAGAACC	60.045	20	TGAGGATGGTGAATTGAGTGA	59.074	21	138	1762	1899	TGTTCCCTTCAGAATCCCTG	60.042	20	GGATGGTGAATTGAGTGATGAA	59.797	22	260	1637	1896
TR23208_c0_g1	ACAGTCCCAAAAGTGGATGG	59.82	20	ATGGGAATCTGGGGAGAGAT	59.714	20	124	152	275	ACAGTCCCAAAAGTGGATGG	59.82	20	TATACCCCGATGGAACAAGG	59.64	20	152	152	303	ACAGTCCCAAAAGTGGATGG	59.82	20	GACAGGTATACCCCGATGGA	59.629	20	158	152	309
TR41517_c1_g1	GCTTCTTCACTTCAGCGTCC	60.142	20	GCTGTGAAGATGCTGCTGTC	59.739	20	253	2283	2535	ACTTCAGCGTCCACCTCTTG	60.444	20	AAAAGCAGCAAAGGCTGAAA	60.131	20	273	2291	2563	CTTCACTTCAGCGTCCACCT	60.444	20	AAAAGCAGCAAAGGCTGAAA	60.131	20	277	2287	2563
TR23460_c3_g1	AGGCAGCAAGATCAAAAGGA	59.955	20	TTCAAATCCAATGGCACAGA	60.049	20	210	797	1006	GGCAGCAAGATCAAAAGGAA	60.331	20	TTCAAATCCAATGGCACAGA	60.049	20	209	798	1006	AGGCAGCAAGATCAAAAGGA	59.955	20	GTTGCCCATGTTTTGAAAGG	60.344	20	163	797	959
TR56024_c0_g3	AGTTGATCTGAAACAGCCCC	59.141	20	AAGCATTGCACTGTCTTTTGAA	59.926	22	265	898	1162	CCACCCCTACACCCAAGATT	60.988	20	AAGCATTGCACTGTCTTTTGAA	59.926	22	247	916	1162	AGTTGATCTGAAACAGCCCC	59.141	20	GCATTGCACTGTCTTTTGAAAC	59.797	22	263	898	1160
TR31920_c2_g5	ATGTGTGCTGCCCAATGTAA	59.995	20	TTTCGGGGGTACAATGACTC	59.79	20	174	2618	2791	TGTGTGCTGCCCAATGTAAT	59.995	20	TTTCGGGGGTACAATGACTC	59.79	20	173	2619	2791	TGTGTGCTGCCCAATGTAAT	59.995	20	GAATTTCGGGGGTACAATGA	59.622	20	176	2619	2794
TR970_c0_g2	CTACAGCTCATCCAGTGGCA	60.008	20	TGCTGAAGTACCCGATTTCC	60.074	20	179	1110	1288	CTACAGCTCATCCAGTGGCA	60.008	20	GTCTAGGGATCGCCTCCTTC	60.176	20	117	1110	1226	CTACAGCTCATCCAGTGGCA	60.008	20	TTTTGCATGCTTGATTTGGA	60.193	20	273	1110	1382
TR9038_c1_g2	ATCGCCTCACCCTAGGACTT	60.096	20	TCACCTTCCTCACCATCTCC	60.048	20	241	2129	2369	AGGACTTAAACGACCTCGCA	59.875	20	TCACCTTCCTCACCATCTCC	60.048	20	228	2142	2369	ATCGCCTCACCCTAGGACTT	60.096	20	CTCGACATGACCATCCACAG	60.113	20	263	2129	2391
TR19925_c0_g1	TGGGCTCCATTCTCAGTTTT	59.67	20	AATGTAAGGCAGTCGGTTGG	59.993	20	158	2054	2211	CTGGGCTCCATTCTCAGTTT	59.284	20	AATGTAAGGCAGTCGGTTGG	59.993	20	159	2053	2211	TTGAGATTTGCAACTGGGCT	60.776	20	AATGTAAGGCAGTCGGTTGG	59.993	20	172	2040	2211
TR41577_c0_g1	GGCACATTAGTGCCAACTGA	59.722	20	TTCCCCTCGATCTCTCAAAA	59.744	20	249	644	892	GGCACATTAGTGCCAACTGA	59.722	20	TCCCCTCGATCTCTCAAAAA	59.744	20	248	644	891	GGCACATTAGTGCCAACTGA	59.722	20	TTTCCCCTCGATCTCTCAAA	59.744	20	250	644	893
TR41577_c0_g1	TTCCTAGATTTGATCCTGCCA	59.654	21	CCAGTCGCATTTATCAAGCA	59.833	20	270	1072	1341	TCCTAGATTTGATCCTGCCA	58.243	20	CCAGTCGCATTTATCAAGCA	59.833	20	269	1073	1341	TCCTAGATTTGATCCTGCCAC	59.14	21	CCAGTCGCATTTATCAAGCA	59.833	20	269	1073	1341
TR50808_c0_g1	GGCGTTCCTTGATTTTCTTC	58.765	20	GGAGGTTAACGTCTCCACCA	59.966	20	229	181	409	GGCGTTCCTTGATTTTCTTC	58.765	20	TGGAGGTTAACGTCTCCACC	59.966	20	230	181	410	GGCGTTCCTTGATTTTCTTC	58.765	20	TTGTTTCGACCTTATTCGGC	60.074	20	173	181	353
TR8231_c0_g1	GCCAAGTTTGGCTCAATGTC	60.646	20	GGCGGGATGAGAATCTAAAA	59.115	20	262	1567	1828	TGCAACTTGATGTTTGGTGC	60.709	20	GGCGGGATGAGAATCTAAAA	59.115	20	141	1688	1828	TGGTGCCATTTTTACAGTGC	59.59	20	AGGCGGGATGAGAATCTAAA	58.74	20	128	1702	1829
TR19113_c0_g2	TTTCCATTCCAGTAAAAGACTGA	57.928	23	TAGGGGTCCAGCTGGTATTG	59.948	20	279	156	434	TTCCAGTAAAAGACTGAATTACCG	58.799	24	TAGGGGTCCAGCTGGTATTG	59.948	20	273	162	434	CACAGCTAAGAAGAGCTTGGAA	58.927	22	TGTTGATTCTGTGATGCAAGTG	59.764	22	251	90	340
TR17318_c2_g14	AACAGTGCACACAATCAACGA	60.214	21	ATTGAGCCGGATGATTTTTG	59.901	20	216	400	615	ACAGTGCACACAATCAACGA	58.706	20	ATTGAGCCGGATGATTTTTG	59.901	20	215	401	615	AACAGTGCACACAATCAACGA	60.214	21	TGAGCCGGATGATTTTTGTT	60.448	20	214	400	613
TR42295_c0_g1	TTTGCACATGTGATAAAACCC	58.4	21	AAAGCATTCCGCAATAGGTG	60.096	20	266	74	339	TTGCACATGTGATAAAACCCTT	59.384	22	AAAGCATTCCGCAATAGGTG	60.096	20	265	75	339	TTTGCACATGTGATAAAACCCT	59.384	22	AAAGCATTCCGCAATAGGTG	60.096	20	266	74	339
TR37681_c0_g1	TAGTACGTCGGTCGGGTCTT	59.615	20	TTTTGCTACAGCGTCTTGGA	59.609	20	260	596	855	TTGTAGTACGTCGGTCGGGT	60.431	20	TTTTGCTACAGCGTCTTGGA	59.609	20	263	593	855	TAGTACGTCGGTCGGGTCTT	59.615	20	GGGACGCTGAGAGAGACAAT	59.41	20	279	596	874
TR29647_c0_g1	CGAACAGTCAGCAAGCCATA	60.011	20	GACTTAGCACTAGGTGGCGG	59.898	20	199	2932	3130	CGAACAGTCAGCAAGCCATA	60.011	20	CTGCCATCTGGTGGTTTTCT	60.111	20	279	2932	3210	AGAGGAGAGGGAGGAGATGC	59.913	20	CTGATCCCCATACACTGGCT	59.95	20	248	3005	3252
TR21322_c0_g1	GCCGTCTGTCCAGAATTGAG	60.801	20	TCACCATCAACAGGGTCAAA	59.935	20	277	2880	3156	CCGTCTGTCCAGAATTGAGC	60.801	20	TCACCATCAACAGGGTCAAA	59.935	20	276	2881	3156	AATTGCCGTCTGTCCAGAAT	59.556	20	TCAACAGGGTCAAATGTTGC	59.547	20	275	2876	3150
TR10412_c1_g3	TGAGAGCGAAATCTCCCCTA	59.91	20	AAGCTAAGGCGTTCCTCCTC	59.983	20	272	863	1134	AGCCCAGGAGTGTCAGAAGA	59.986	20	ACTGGCCCTTGTTTGACTTG	60.149	20	222	800	1021	AGCCCAGGAGTGTCAGAAGA	59.986	20	CTGGCCCTTGTTTGACTTGT	60.149	20	221	800	1020
TR23713_c0_g1	CATGATTGTTTGTCATGGGG	59.623	20	AGCACCAAATCAAAGTTGGG	59.971	20	113	577	689	TGATTGTTTGTCATGGGGAG	59.343	20	AGCACCAAATCAAAGTTGGG	59.971	20	111	579	689	CATGATTGTTTGTCATGGGG	59.623	20	CACCAAATCAAAGTTGGGGA	60.724	20	111	577	687
TR23222_c0_g1	TTTTAGCCAATCAGATGCCC	60.038	20	AAGAAATGTTTCATTCTCAGGGA	59.123	23	189	7	195	TTTTAGCCAATCAGATGCCC	60.038	20	AAAAGAAATGTTTCATTCTCAGGG	59.887	24	191	7	197	TTTTAGCCAATCAGATGCCC	60.038	20	AGAAATGTTTCATTCTCAGGGA	57.786	22	188	7	194
TR10647_c0_g1	GCAGTCAACGGTTTGGTTTT	60.015	20	ACACCAAAAGCATCGCATTC	61.043	20	232	2780	3011	CTCGGAAACCATTTCCTTGA	60.044	20	GAACACCAAAAGCATCGCAT	61.043	20	171	2843	3013	CTCGGAAACCATTTCCTTGA	60.044	20	ACACCAAAAGCATCGCATTC	61.043	20	169	2843	3011
TR44961_c0_g1	TTTTTCCAGAACAGTGGATAACTT	58.317	24	CTTTTTGTGTCAGGCCCCTT	61.395	20	172	2096	2267	TTTTTCCAGAACAGTGGATAACTT	58.317	24	TTTTGTGTCAGGCCCCTTT	60.48	19	170	2096	2265	TTTTTCCAGAACAGTGGATAACTT	58.317	24	TTTGTGTCAGGCCCCTTTT	60.48	19	169	2096	2264
TR51208_c0_g1	TGGAGGCCGTGCTATAGTGT	60.678	20	ACAAGTCATGGAGACCGACC	59.969	20	270	5	274	GGAGGCCGTGCTATAGTGTG	60.678	20	ACAAGTCATGGAGACCGACC	59.969	20	269	6	274	GTGGAGGCCGTGCTATAGTG	60.678	20	ACAAGTCATGGAGACCGACC	59.969	20	271	4	274
TR3310_c1_g1	TGCGCATTTGCATTATTTTC	59.682	20	TCCGATTTCTTAAGCTGCAA	58.651	20	205	1962	2166	GCGCATTTGCATTATTTTCA	59.682	20	TCCGATTTCTTAAGCTGCAA	58.651	20	204	1963	2166	TGCGCATTTGCATTATTTTC	59.682	20	GTCCGATTTCTTAAGCTGCAA	59.488	21	206	1962	2167
TR3310_c1_g1	GCACAGTAATGGGTCCAGATG	60.39	21	GCTTTATAACATTGGGCACTGA	59.146	22	169	2495	2663	GCACAGTAATGGGTCCAGATG	60.39	21	AGCTTTATAACATTGGGCACTGA	60.036	23	170	2495	2664	AGCACAGTAATGGGTCCAGA	58.158	20	GCTTTATAACATTGGGCACTGA	59.146	22	170	2494	2663
TR26171_c5_g2	CCATGTCCTCTAAATACCCCC	59.541	21	AGCATCCATTTCAGCCAATC	60.043	20	236	1177	1412	CCATGTCCTCTAAATACCCCC	59.541	21	CGGCCTCCAATTTTAGTTCA	60.067	20	196	1177	1372	CCATGTCCTCTAAATACCCCC	59.541	21	ACCGGCCTCCAATTTTAGTT	59.835	20	198	1177	1374
TR33204_c7_g2	CATATGCACCTGGCAAAGAA	59.688	20	GCCGTCTGATCAGGATCTTC	59.768	20	183	295	477	CCAGATCAGCTGGAACATCA	59.787	20	TTATCACGTGTGCATCCAGG	60.539	20	147	379	525	ATGCACCTGGCAAAGAAGTC	60.263	20	TTATCACGTGTGCATCCAGG	60.539	20	228	298	525
TR3301_c0_g1	GCTGAGGGAGTTATAGCCCA	59.292	20	GCCTCAAAAAGTGCCCTACA	60.249	20	252	2069	2320	TGGGACAGCTGAGGGAGTTA	60.791	20	GCCTCAAAAAGTGCCCTACA	60.249	20	259	2062	2320	AGCTGAGGGAGTTATAGCCCA	60.235	21	GCCTCAAAAAGTGCCCTACA	60.249	20	253	2068	2320
TR10304_c0_g1	AAAATGGCCCTAAGTCCAAAA	59.83	21	TCCTCGCAATTAAGGTAGTGC	59.375	21	278	1043	1320	TTTGTAATGGGGACTAAGCACA	59.514	22	ACCGTAACTGCGAGGACAAG	60.312	20	209	1205	1413	TGGCCCTAAGTCCAAAATAAA	58.617	21	TTGGTCCTCGCAATTAAGGT	59.569	20	278	1047	1324
TR10304_c0_g1	TACGGTAAGACCGAAAACCG	59.99	20	CAGACAGACAGGCAGATGGA	59.98	20	166	1408	1573	TACGGTAAGACCGAAAACCG	59.99	20	AAACGGACAGACAGACAGGC	60.307	20	173	1408	1580	CTTGTCCTCGCAGTTACGGT	60.312	20	CAGACAGACAGGCAGATGGA	59.98	20	180	1394	1573
TR422_c0_g1	TCGCTCCTTGGTCTTCTCAT	59.95	20	GTCCCAGCGAAAGTTCATGT	60.119	20	253	350	602	TCGCTCCTTGGTCTTCTCAT	59.95	20	AACTGCATGGAGGCAGTACC	60.142	20	230	350	579	ATATATCCGTCCCCTTCGCT	59.783	20	ATGGAGGCAGTACCAACGAC	59.997	20	239	335	573
TR35969_c1_g1	CCAGCGGTTTGGTGTTTATT	59.861	20	CAGGATTAAATGGGTTGACCA	59.671	21	251	870	1120	ACCAGCGGTTTGGTGTTTAT	59.359	20	CAGGATTAAATGGGTTGACCA	59.671	21	252	869	1120	CCAGCGGTTTGGTGTTTATTA	59.876	21	CAGGATTAAATGGGTTGACCA	59.671	21	251	870	1120
TR57443_c3_g2	CCCAGAAAGTTGTTGTACGCT	59.295	21	CCGGTTTCTTCAATCTAGGC	58.787	20	161	4068	4228	CCCAGAAAGTTGTTGTACGC	58.283	20	CCGGTTTCTTCAATCTAGGC	58.787	20	161	4068	4228	CCCAGAAAGTTGTTGTACGCT	59.295	21	CCGGTTTCTTCAATCTAGGCT	59.733	21	161	4068	4228
TR995_c0_g1	TGCCATAGGTTGGAGTGACA	60.112	20	ACTCCCACATGTCCTTCGTC	59.969	20	259	1505	1763	TGCCATAGGTTGGAGTGACA	60.112	20	CTCCCACATGTCCTTCGTCT	60.112	20	258	1505	1762	AACAGTTGCCGGTCTACCAC	60.035	20	ATTTCTGCTGGCTGGACAAC	60.263	20	142	1439	1580
TR9040_c0_g1	TAGTATGCGTTTTTGGGGTG	58.556	20	TGCATTTTGAAAGTCAGTTGG	58.808	21	280	109	388	ACAACACCTGCAACCTGAAA	59.187	20	AACACTTTCTGGACATAGCTTGC	59.839	23	279	80	358	ACAACACCTGCAACCTGAAA	59.187	20	CTTTGTTGATTGTGCAAGGTT	57.799	21	173	80	252
TR43792_c0_g1	ATATTGTGGTTGACCCACCC	59.386	20	ATGCCTGCTGTTCCTTCCTA	59.836	20	272	3993	4264	CGAGCACACAAGATTTACGG	59.342	20	ATGCCTGCTGTTCCTTCCTA	59.836	20	245	4020	4264	ATATTGTGGTTGACCCACCC	59.386	20	TAATGCCTGCTGTTCCTTCC	60.214	20	274	3993	4266
TR16472_c0_g1	CTGGTACTAAAGGGCCCACA	59.986	20	GGCTTACCGTCTGCTTTTTG	59.883	20	176	1344	1519	TACTAAAGGGCCCACACTGC	60.132	20	GGCTTACCGTCTGCTTTTTG	59.883	20	172	1348	1519	TGGTACTAAAGGGCCCACAC	59.853	20	GGCTTACCGTCTGCTTTTTG	59.883	20	175	1345	1519
TR38769_c0_g1	GTATGACCCGGGATGATGTC	60.018	20	AGCATCTCCAAGTCTCGCAT	59.981	20	254	416	669	GTATGACCCGGGATGATGTC	60.018	20	TATCGGGGAACCTTGAATTG	59.756	20	210	416	625	GTATGACCCGGGATGATGTC	60.018	20	GGAACCTTGAATTGCTCCCT	60.443	20	204	416	619
TR54156_c0_g1	GCCTCTTCATCATTTCGAGC	59.923	20	GATGAACAAGGGGATGCTGT	59.934	20	217	149	365	GCCTCTTCATCATTTCGAGC	59.923	20	ATGAACAAGGGGATGCTGTC	59.934	20	216	149	364	GCCTCTTCATCATTTCGAGC	59.923	20	AGATGAACAAGGGGATGCTG	60.073	20	218	149	366
TR45141_c0_g2	CAAGCCATTCAATATTTGTTTTT	57.378	23	AACCAAAACACGAGCCAGAC	60.156	20	251	1	251	ACAAGCCATTCAATATTTGTTTTT	58.155	24	AACCAAAACACGAGCCAGAC	60.156	20	252	0	251	CAAGCCATTCAATATTTGTTTTT	57.378	23	AAACCAAAACACGAGCCAGA	60.668	20	252	1	252
TR14726_c0_g1	TGAGAGTCCTCGCTCTCCAT	60.096	20	CGGCTCTTCACGAAACTCTC	60.134	20	198	969	1166	ATGAGAGTCCTCGCTCTCCA	60.096	20	CGGCTCTTCACGAAACTCTC	60.134	20	199	968	1166	TGAGAGTCCTCGCTCTCCAT	60.096	20	GTTAGCTCCCCTAACGGCTC	60.228	20	212	969	1180
TR26608_c0_g1	CCGGGTGTGAAACTAATGCT	59.993	20	TTTGAGTAAATGGCCAGAACAA	59.625	22	228	1092	1319	CCGGGTGTGAAACTAATGCT	59.993	20	TTTTGAGTAAATGGCCAGAACA	59.625	22	229	1092	1320	CCGGGTGTGAAACTAATGCT	59.993	20	CAAGTCATCTGCAAACTGTGCT	60.496	22	257	1092	1348
TR31908_c6_g1	CCTGTTCAAAAGCCTGTGGT	60.149	20	CTCGGCAAAATTATCACCGT	59.96	20	267	1814	2080	AGCTCCACTATGTCGCCTGT	59.898	20	CGGCAAAATTATCACCGTTT	59.832	20	280	1799	2078	TCCACTATGTCGCCTGTTCA	60.263	20	CTCGGCAAAATTATCACCGT	59.96	20	279	1802	2080
TR9071_c4_g2	CTGCCGGAGAAGTAAAGACG	60.008	20	AATAGACGAGTGGACGTCGG	60.134	20	242	1353	1594	CAGGGGACTTACGAGTGCAT	60.134	20	AATAGACGAGTGGACGTCGG	60.134	20	273	1322	1594	CTGCCGGAGAAGTAAAGACG	60.008	20	GAAGCTGAACATGGGAGGTC	59.661	20	274	1353	1626
TR35966_c0_g1	GCAGACAGCCAGCATTTTCT	60.547	20	TGGAGTTGGTTTTCAGCACA	60.278	20	213	426	638	ATTGCAGACAGCCAGCATTT	60.807	20	TGGAGTTGGTTTTCAGCACA	60.278	20	216	423	638	GCAGACAGCCAGCATTTTCT	60.547	20	CGCCTTCCGACAATGAAATA	60.961	20	249	426	674
TR9031_c0_g1	TGCACCCATGTATGTCACCT	59.837	20	AAAGCCAACTGCCAGAAAGA	59.993	20	265	124	388	TGCACCCATGTATGTCACCT	59.837	20	CCCCTGGATAAAGCTGTTCA	60.066	20	225	124	348	TGCACCCATGTATGTCACCT	59.837	20	TGTTCCCCTGGATAAAGCTG	60.066	20	229	124	352
TR57472_c1_g4	TTTTCAACCTTTGGGAGCC	60.037	19	GCTTGAACTCGAGTGAAAAGGT	59.928	22	239	1392	1630	TTTTCAACCTTTGGGAGCC	60.037	19	TCACAAGAAGGTGCTAAGGTGA	59.914	22	212	1392	1603	TTTTCAACCTTTGGGAGCC	60.037	19	TTGAACTCGAGTGAAAAGGTCA	59.891	22	237	1392	1628
TR33184_c1_g1	CATGGCCACTGTGATTTGAG	60.112	20	AGCGTAACGATGACGCTTCT	60.044	20	246	1669	1914	CATGGCCACTGTGATTTGAG	60.112	20	ATCCACACCGTTTTCTCTGC	60.119	20	202	1669	1870	GCCACTGTGATTTGAGGACA	59.682	20	AGCGTAACGATGACGCTTCT	60.044	20	242	1673	1914
TR16471_c0_g1	CGCAAACTACGACATTGCAT	59.759	20	TCTTGCAATCAAAACGTTGG	59.706	20	132	984	1115	CGCAAACTACGACATTGCAT	59.759	20	GCAATCAAAACGTTGGCAAT	60.876	20	128	984	1111	GACATTGCATTCATACCACCC	60.073	21	TCTTGCAATCAAAACGTTGG	59.706	20	122	994	1115
TR15196_c0_g1	GTCCTTGCCCATATTCCAAA	59.762	20	TGACTGGCGCAAGTATCATT	59.301	20	183	923	1105	ATGTCCTTGCCCATATTCCA	60.155	20	GACTGGCGCAAGTATCATTGT	60.154	21	184	921	1104	GGGTACATGCATTCAACCGT	60.646	20	TGACTGGCGCAAGTATCATT	59.301	20	280	826	1105
TR53978_c0_g1	TTCTGCTGATGTCGGTTCTG	59.984	20	AACAAGCACTCCAGCCTCAT	59.874	20	250	1938	2187	GTCGGTTCTGATGTCCACCT	59.969	20	AACAAGCACTCCAGCCTCAT	59.874	20	240	1948	2187	GGTTCTGATGTCCACCTGCT	60.12	20	AACAAGCACTCCAGCCTCAT	59.874	20	237	1951	2187
TR41839_c0_g2	TTGGCAGCAGAGAAAGGAGT	60.134	20	GGTCAGCCTCTTTGCTATCG	59.978	20	207	745	951	TTGGCAGCAGAGAAAGGAGT	60.134	20	TTTGACTGGGTCAGCCTCTT	59.844	20	215	745	959	TTGGCAGCAGAGAAAGGAGT	60.134	20	TTGACTGGGTCAGCCTCTTT	59.844	20	214	745	958
TR8140_c0_g1	GTAGAAGCCGAAACGAGCAC	60.022	20	AGCCGCTGTCGGTATCTAAA	59.867	20	257	1586	1842	GTAGAAGCCGAAACGAGCAC	60.022	20	GCCGCTGTCGGTATCTAAAC	59.736	20	256	1586	1841	GTAGAAGCCGAAACGAGCAC	60.022	20	TTGAAGCCAATCAGAAGCAA	59.542	20	177	1586	1762
TR40027_c0_g1	TCAGCATGAAAGTAATGCACAA	59.373	22	AATGGGCCTCATGCTTAATG	59.923	20	150	1696	1845	TCAGCATGAAAGTAATGCACAA	59.373	22	TCCCATTAAGCAAACTGCCT	59.708	20	183	1696	1878	TCAGCATGAAAGTAATGCACA	57.933	21	AATGGGCCTCATGCTTAATG	59.923	20	150	1696	1845
TR3248_c1_g1	AGGAAGAAGGAAGCCGAGAA	60.455	20	GCAGCTTTATCGGACAACAA	58.92	20	250	298	547	AGGAAGAAGGAAGCCGAGAA	60.455	20	GCAGCTTTATCGGACAACAAG	59.897	21	250	298	547	AGGAAGAAGGAAGCCGAGAA	60.455	20	AGCAGCTTTATCGGACAACAA	59.897	21	251	298	548
TR3248_c1_g1	TTTCAGGCTAACACACGACG	59.904	20	TGAGCAGTCGACATTTGCTT	59.596	20	147	736	882	TTTCAGGCTAACACACGACG	59.904	20	TTGAGCAGTCGACATTTGCT	59.596	20	148	736	883	TTTCAGGCTAACACACGACG	59.904	20	GTTGAGCAGTCGACATTTGC	59.45	20	149	736	884
TR23723_c1_g2	TACCTTTGGGTGGGTGAAAA	60.198	20	GAGCATCCGTGAAACAAACA	59.697	20	233	834	1066	TACCTTTGGGTGGGTGAAAA	60.198	20	GCATCCGTGAAACAAACAAA	59.566	20	231	834	1064	GAATACCTTTGGGTGGGTGA	59.647	20	GAGCATCCGTGAAACAAACA	59.697	20	236	831	1066
TR35364_c0_g1	TTGCACAGCCATTTTCAGTT	59.322	20	GTGGGAACCAGCTATCCAAA	59.933	20	259	456	714	TGCACAGCCATTTTCAGTTT	59.322	20	GTGGGAACCAGCTATCCAAA	59.933	20	258	457	714	TGCACAGCCATTTTCAGTTT	59.322	20	GGTGATATGTGGGAACCAGC	60.203	20	266	457	722
TR35415_c1_g1	TTCAAAACCATCGAGGGAAG	60.044	20	GGAATGTCCCAAACTTCCAA	59.767	20	280	508	787	AACCATCGAGGGAAGGAGAT	59.896	20	GGAATGTCCCAAACTTCCAA	59.767	20	275	513	787	AAAACCATCGAGGGAAGGAG	60.434	20	GGAATGTCCCAAACTTCCAA	59.767	20	277	511	787
TR9758_c1_g1	TAATGCAACCATGCCAAATC	59.381	20	TCGGTGTGTACAATTCCTTTTG	59.898	22	278	101	378	TAATGCAACCATGCCAAATC	59.381	20	CGGTGTGTACAATTCCTTTTGA	59.898	22	277	101	377	TGCAACCATGCCAAATCATA	60.875	20	TCGGTGTGTACAATTCCTTTTG	59.898	22	275	104	378
TR30330_c0_g1	TTGTAACTTTTAAAAATGAAACCAGAA	58.779	27	AATGTCACCGCGAACTTTTT	59.615	20	141	5	145	TTGTAACTTTTAAAAATGAAACCAGAA	58.779	27	AAAAATGTCACCGCGAACTT	59.615	20	144	5	148	CATTGTAACTTTTAAAAATGAAACCAG	58.688	27	AATGTCACCGCGAACTTTTT	59.615	20	143	3	145
TR48791_c2_g5	TTACTTTGCGCGAACATGAC	59.879	20	TCACGCAAACAAATATCCCA	59.93	20	121	1163	1283	TTACTTTGCGCGAACATGAC	59.879	20	ATTGGTTGTTTTCCATTGGC	59.668	20	241	1163	1403	TTACTTTGCGCGAACATGAC	59.879	20	TCTGTCTGTCCGTCTGTGCT	59.603	20	203	1163	1365
TR25808_c5_g2	TTGTTGAGAGGGTGTGTCCA	60.129	20	AGGTCAGATGGGAATGGTTG	59.779	20	245	127	371	TTGTTGAGAGGGTGTGTCCA	60.129	20	CAAGGTCAGATGGGAATGGT	59.779	20	247	127	373	GCCAGAGGTTTGTTGAGAGG	59.844	20	AGGTCAGATGGGAATGGTTG	59.779	20	254	118	371
TR35986_c1_g1	CACCTGCACTTGGGGTAACT	60.028	20	GCAGAATATCCAGCCTCAGC	59.946	20	238	3427	3664	ACCTGCACTTGGGGTAACTG	60.028	20	GCAGAATATCCAGCCTCAGC	59.946	20	237	3428	3664	AGGTTGGCAGCAGTGAGAGT	60.057	20	GCAGAATATCCAGCCTCAGC	59.946	20	201	3464	3664
TR57391_c0_g1	TGGAGGTCCATCATCTGTCA	60.046	20	AGGGATTTCAAGGCAGGACT	60.074	20	213	3519	3731	CCTGTGGAGGTCCATCATCT	59.92	20	AGGGATTTCAAGGCAGGACT	60.074	20	217	3515	3731	ACCTGTGGAGGTCCATCATC	59.774	20	AGGGATTTCAAGGCAGGACT	60.074	20	218	3514	3731
TR6610_c1_g2	AATTGCACATCCAAGTTCCG	60.894	20	AACACTGGAGGGTTGAATGC	59.973	20	121	1072	1192	GGCCATGGTTCTTACATTTGA	59.815	21	AACACTGGAGGGTTGAATGC	59.973	20	272	921	1192	GGGCCATGGTTCTTACATTT	58.765	20	AACACTGGAGGGTTGAATGC	59.973	20	273	920	1192
TR36158_c4_g1	AGTCTCGGTTTTTAGCCGAA	58.973	20	TGTCTGACTTGCTGATCCTTG	59.022	21	278	580	857	AGTCTCGGTTTTTAGCCGAA	58.973	20	TGTCTGACTTGCTGATCCTTGT	59.914	22	278	580	857	TCTCGGTTTTTAGCCGAAAT	58.831	20	TGTCTGACTTGCTGATCCTTG	59.022	21	276	582	857
TR36158_c4_g1	TTGTCAATCATGACCACGAGA	60.104	21	GGAATCAGTCCTGTGGGAAA	59.903	20	257	1355	1611	TGTCAATCATGACCACGAGAG	59.692	21	GGAATCAGTCCTGTGGGAAA	59.903	20	256	1356	1611	TGTCAATCATGACCACGAGA	58.56	20	GGAATCAGTCCTGTGGGAAA	59.903	20	256	1356	1611
TR14193_c0_g1	TCGATTGAAAAGGAAATCGG	60.009	20	TTTTGGCATTTTCATGCACT	59.161	20	209	1735	1943	CGAGGCCTTCTTGATCTGTC	59.95	20	TTTTGGCATTTTCATGCACT	59.161	20	157	1787	1943	AAAAGGAAATCGGTGGCTTT	59.945	20	TTTTGGCATTTTCATGCACT	59.161	20	202	1742	1943
TR25133_c0_g1	TCTGCTTGATGAAAACAGCG	60.134	20	ATTTGCTCTGCAAAGATCGC	60.499	20	265	983	1247	CAGCGAAAGCAAGTTGTGAA	60.172	20	ATTTGCTCTGCAAAGATCGC	60.499	20	250	998	1247	ACAGCGAAAGCAAGTTGTGA	59.64	20	ATTTGCTCTGCAAAGATCGC	60.499	20	251	997	1247
TR32863_c1_g1	ATTTGTCGGAGCAGAATTGC	60.221	20	TCCTACAAATTTGCATCCCC	59.762	20	143	2148	2290	GCTTTTCATGCGTGTGATGT	59.728	20	TCCTACAAATTTGCATCCCC	59.762	20	164	2127	2290	GTGCTTTTCATGCGTGTGAT	59.728	20	TCCTACAAATTTGCATCCCC	59.762	20	166	2125	2290
TR40312_c0_g2	ACCAATTTTCATCCGGTTTG	59.662	20	TGCAGTATCATTCCAAGACCA	59.138	21	263	480	742	ACCAATTTTCATCCGGTTTG	59.662	20	GTGCAGTATCATTCCAAGACCA	60	22	264	480	743	ACCAATTTTCATCCGGTTTG	59.662	20	CATTCCAAGACCAAGTTGTCAG	59.633	22	255	480	734
TR39371_c0_g1	ATCAACTGCAACAAAAGCCA	59.322	20	CCTCGATCTGTGCTGTCTGA	60.138	20	239	712	950	TCAACTGCAACAAAAGCCAT	59.322	20	CCTCGATCTGTGCTGTCTGA	60.138	20	238	713	950	ATCAACTGCAACAAAAGCCA	59.322	20	GCACTTTTTGCCTTCAGGTC	59.859	20	210	712	921
TR23492_c1_g1	TCCATCTCATCCGTCAACTG	59.631	20	AAGATTGCATGTTCTGCTGC	59.031	20	221	725	945	TCCATCTCATCCGTCAACTG	59.631	20	GATTGCATGTTCTGCTGCAA	60.969	20	219	725	943	ACTGGAAGTTTCTCCCCCTC	59.534	20	AAGATTGCATGTTCTGCTGC	59.031	20	205	741	945
TR21811_c0_g1	AGAAGGGAAATGTTGCGAGA	59.813	20	AAAACGGCAAAAACTCTGTTG	59.299	21	267	2238	2504	AGAAGGGAAATGTTGCGAGA	59.813	20	AAACGGCAAAAACTCTGTTG	57.934	20	266	2238	2503	AGAAGGGAAATGTTGCGAGA	59.813	20	AAAACGGCAAAAACTCTGTTGT	60.075	22	267	2238	2504
TR41286_c1_g1	TATCCTCACCCGCTTCTCTC	59.386	20	TTTGTGTGAAAATGCGCTTC	59.856	20	276	277	552	CGCTTCTCTCCTCAAGGTCA	60.668	20	TTTGTGTGAAAATGCGCTTC	59.856	20	266	287	552	TATCCTCACCCGCTTCTCTC	59.386	20	TGGCCCTTGTGCGATATAAT	60.31	20	255	277	531
TR3286_c3_g1	TACGCTCCTAATCCGGTCAC	60.096	20	AAACCAGGATATTAAAGTATTGCATTT	58.883	27	220	1394	1613	TACGCTCCTAATCCGGTCAC	60.096	20	AAAACCAGGATATTAAAGTATTGCAT	57.807	26	221	1394	1614	TACGCTCCTAATCCGGTCAC	60.096	20	AACCAGGATATTAAAGTATTGCATTT	57.807	26	219	1394	1612
TR27261_c0_g2	TGGTGAAGTTGATCTGCCAA	60.24	20	GGATTTTGTGCAGTTGCTGA	59.847	20	174	296	469	TTGGTGAAGTTGATCTGCCA	60.24	20	GGATTTTGTGCAGTTGCTGA	59.847	20	175	295	469	TGGTGAAGTTGATCTGCCAA	60.24	20	CATGGTCGACAAAGCAACAG	60.301	20	139	296	434
TR27261_c0_g2	CCTTGCTCCATACCCTTTGA	60.066	20	AGATCCACCATGGCTTCTTG	60.073	20	250	1139	1388	TCCTTGCTCCATACCCTTTG	60.066	20	AGATCCACCATGGCTTCTTG	60.073	20	251	1138	1388	TCCTTGCTCCATACCCTTTG	60.066	20	CAGATCCACCATGGCTTCTT	60.073	20	252	1138	1389
TR56841_c0_g1	TTTTACGTGAGCACCGTTTG	59.769	20	AAGGAAGGGAAATGAGCGAT	60.039	20	278	1046	1323	GTGAGCACCGTTTGCTTTTT	60.292	20	AAGGAAGGGAAATGAGCGAT	60.039	20	272	1052	1323	TTTTACGTGAGCACCGTTTG	59.769	20	AATGACGTACCAGGCCTCAG	60.134	20	258	1046	1303
TR36047_c2_g1	ATGGCTATGTGTGGGCAGAT	60.37	20	TCGAGCTAAAAATCAAATGGAA	58.871	22	164	1401	1564	ATGGCTATGTGTGGGCAGAT	60.37	20	TCGAGCTAAAAATCAAATGGAAC	59.637	23	164	1401	1564	ATGGCTATGTGTGGGCAGAT	60.37	20	GTCGAGCTAAAAATCAAATGGAA	59.637	23	165	1401	1565
TR23926_c2_g1	CCAGTACTCAGGCTGCACAA	60.049	20	TATTTTGCGAAATGGAAGGG	59.901	20	264	5359	5622	CAGCATTCTGCAGACAGGAA	60.136	20	TATTTTGCGAAATGGAAGGG	59.901	20	184	5439	5622	CCAGTACTCAGGCTGCACAA	60.049	20	GAAGGGGAAGGTTTTTCGAT	59.397	20	250	5359	5608
TR55078_c0_g1	AACATAGGCAGTCTGTGGGG	59.989	20	CAACGTACCATTTGTGCCTG	60.027	20	244	1102	1345	GGGGAGGGTAATACATGGCT	60.039	20	CAACGTACCATTTGTGCCTG	60.027	20	227	1119	1345	TGAAACTGAGGCTGTGGTTG	59.873	20	CAACGTACCATTTGTGCCTG	60.027	20	183	1163	1345
TR57230_c0_g2	TTGGGTCAACTTGTAGAGCG	58.923	20	TTTTTATGTTGTGGGGGCAT	60.053	20	178	1717	1894	TTGGGTCAACTTGTAGAGCG	58.923	20	GAGATGCATCACTTCCGGTT	60.081	20	111	1717	1827	TTGGGTCAACTTGTAGAGCGT	59.788	21	TTTTTATGTTGTGGGGGCAT	60.053	20	178	1717	1894
TR29315_c1_g1	GCATGGCAATTTTGCACTAA	59.708	20	GGGTGGAGTGATCATTGTGA	59.318	20	266	2046	2311	GCATGGCAATTTTGCACTAA	59.708	20	GTGATCATTGTGAAACGGGC	61.322	20	259	2046	2304	GCATGGCAATTTTGCACTAA	59.708	20	GAGTGATCATTGTGAAACGGG	60.368	21	261	2046	2306
TR48726_c2_g1	TTTTGTCAGTGAACGGTTGC	59.74	20	TGCACCCAAAAATTCAGATT	58.066	20	228	2166	2393	CAGTGAACGGTTGCAAATTC	59.174	20	TGCACCCAAAAATTCAGATT	58.066	20	222	2172	2393	TTTTGTCAGTGAACGGTTGC	59.74	20	TGCACCCAAAAATTCAGATTTA	59.472	22	228	2166	2393
TR26459_c0_g1	GACACCAGACAGAAGCGACA	60.03	20	CTAAACTGACGGGGCTGAAC	59.734	20	272	1657	1928	TGACACCAGACAGAAGCGAC	60.03	20	CTAAACTGACGGGGCTGAAC	59.734	20	273	1656	1928	GTGACACCAGACAGAAGCGA	60.03	20	CTAAACTGACGGGGCTGAAC	59.734	20	274	1655	1928
TR38249_c3_g2	AAAGCGATATTGCGCATAGAA	59.859	21	TTCTCCTCCTCCTCATCATCA	59.746	21	130	1582	1711	TGAGGATGGTAATGAAAGCG	58.721	20	TTCTCCTCCTCCTCATCATCA	59.746	21	144	1568	1711	AAGCGATATTGCGCATAGAA	58.563	20	TTCTCCTCCTCCTCATCATCA	59.746	21	129	1583	1711
TR26073_c0_g1	TTTGTGCCTGACTTGCTCAC	60.032	20	GCATGCAATCTGACCCAGTA	59.679	20	269	147	415	GCCTGACTTGCTCACACAGA	60.187	20	GCATGCAATCTGACCCAGTA	59.679	20	264	152	415	TTTGTGCCTGACTTGCTCAC	60.032	20	GACCCAGTATTTTGCCATCC	59.249	20	258	147	404
TR26073_c0_g1	GGATGGCAAAATACTGGGTC	59.249	20	TACATTTACACCGGTGGGGT	59.971	20	145	385	529	TGGCAAAATACTGGGTCAGA	59.123	20	TACATTTACACCGGTGGGGT	59.971	20	142	388	529	GGATGGCAAAATACTGGGTC	59.249	20	AATTTTTCTGCCAAGCATCG	60.209	20	272	385	656
TR23292_c0_g2	TGGATGTTTGTTGTTGTTGATG	59.342	22	AAGCAATGAATCGCACAAACT	59.766	21	280	1770	2049	TGGATGTTTGTTGTTGTTGATG	59.342	22	AGCAATGAATCGCACAAACT	58.38	20	279	1770	2048	GGATGTTTGTTGTTGTTGATGA	58.379	22	AAAGCAATGAATCGCACAAA	59.305	20	280	1771	2050
TR58279_c2_g1	CCATCCATGGAGATAAGGGTT	60.025	21	TGTCCACAATTCCAAGTTCCT	59.439	21	218	137	354	AACCATCCATGGAGATAAGGG	60.025	21	TGTCCACAATTCCAAGTTCCT	59.439	21	220	135	354	CCATCCATGGAGATAAGGGTT	60.025	21	TGTCCACAATTCCAAGTTCC	58.387	20	218	137	354
TR47868_c1_g1	GGCTTTAATGCAGGCTTCTG	59.982	20	AATGCCAAAACCTCAGCAAC	60.118	20	246	417	662	CAGGCTTTAATGCAGGCTTC	59.982	20	AATGCCAAAACCTCAGCAAC	60.118	20	248	415	662	CTTTAATGCAGGCTTCTGGG	59.839	20	AATGCCAAAACCTCAGCAAC	60.118	20	244	419	662
TR51703_c3_g1	GAGGTGACGGCTGAGGTAAA	60.255	20	TCAACATCACATGCAGCAAA	59.833	20	164	1	164	AGGTGACGGCTGAGGTAAAA	59.734	20	TCAACATCACATGCAGCAAA	59.833	20	163	2	164	GACGGCTGAGGTAAAACCTG	59.734	20	TCAACATCACATGCAGCAAA	59.833	20	159	6	164
TR49135_c0_g1	TGCTCATTTGTTTGGTTGGA	60.088	20	TCAAAGAACATGCTTCCTGC	59.002	20	206	1791	1996	TGTGTTCGATTACCAAGGCA	60.111	20	TCAAAGAACATGCTTCCTGC	59.002	20	231	1766	1996	TGCTCATTTGTTTGGTTGGA	60.088	20	CAAAGAACATGCTTCCTGCAT	60.264	21	205	1791	1995
TR38733_c0_g1	TGAATAGGCAATGGCAGTGA	60.22	20	AAGTTGGAGGACTGCCAGAA	59.844	20	274	910	1183	TGAATAGGCAATGGCAGTGA	60.22	20	AAAGTTGGAGGACTGCCAGA	59.844	20	275	910	1184	TGAATAGGCAATGGCAGTGA	60.22	20	TCGAAATTCTGCCATCATCA	60.159	20	249	910	1158
TR44871_c3_g2	GGACTTCCGATCGATTCCTT	60.41	20	TCAACAATGTAAGCAGTTCAGTG	58.029	23	123	961	1083	GGACTTCCGATCGATTCCTT	60.41	20	TCAACAATGTAAGCAGTTCAGTGAT	60.109	25	123	961	1083	GGACTTCCGATCGATTCCTT	60.41	20	GATCAACAATGTAAGCAGTTCAGTG	60.109	25	125	961	1085
TR35302_c0_g3	AAGCAAAACTATTGCCAACCA	59.639	21	TGCAGTTTGCAGTCATGTCA	60.029	20	155	101	255	AGCAAAACTATTGCCAACCA	58.294	20	TGCAGTTTGCAGTCATGTCA	60.029	20	154	102	255	AAGCAAAACTATTGCCAACCAT	59.904	22	TGCAGTTTGCAGTCATGTCA	60.029	20	155	101	255
TR48685_c1_g1	GACGGAACAACAACGAACA	58.066	19	ACTGGTTTAGACACGCCCAC	60.035	20	115	0	114	GACGGAACAACAACGAACA	58.066	19	CTGGTTTAGACACGCCCACT	60.171	20	114	0	113	GACGGAACAACAACGAACA	58.066	19	TGATTCCTCATCAGTGGCAG	59.787	20	215	0	214
TR48685_c1_g1	TTTGGGTCAACTCCAAAAGAA	59.573	21	GGCGGCTCACTCACTAAGAC	60.02	20	248	989	1236	TTTGGGTCAACTCCAAAAGAA	59.573	21	AGGAAACTCAGCACGAGCAT	60.02	20	183	989	1171	TGGGTCAACTCCAAAAGAACA	60.514	21	GGCGGCTCACTCACTAAGAC	60.02	20	246	991	1236
TR51786_c3_g13	TCCAAGCTGCTTTTTGTGTG	60.027	20	CAGAAAACCGTACCGGACAT	59.853	20	242	1098	1339	AGCTGCTTTTTGTGTGGCTT	60.059	20	CAGAAAACCGTACCGGACAT	59.853	20	238	1102	1339	AAGCTGCTTTTTGTGTGGCT	60.059	20	CAGAAAACCGTACCGGACAT	59.853	20	239	1101	1339
TR28771_c1_g2	CCCCGGTCACTACATCAAAC	60.232	20	TCCAACTTATCCAGGTTGCC	59.933	20	231	1556	1786	GCTACAATGTGATGTTGCCG	60.142	20	CTTCTTCTCCTCCCTCTGGG	60.319	20	251	1463	1713	GCTACAATGTGATGTTGCCG	60.142	20	CCTCGTCTTCTTCTCCTCCC	60.328	20	257	1463	1719
TR21380_c0_g1	GGGTGGAGGCTGTCTTTGTA	60.111	20	GCCCACGTTCACCATACTTT	59.859	20	269	4421	4689	CCGAAGCCGTGGTAAAGATA	60.089	20	ATGCCCACGTTCACCATACT	60.263	20	143	4549	4691	GGGTGGAGGCTGTCTTTGTA	60.111	20	ATGCCCACGTTCACCATACT	60.263	20	271	4421	4691
TR58778_c0_g1	AAAAACCAGCCAAACCAGTG	60.008	20	GAAGTAGGCCGCCATGTTAG	59.73	20	128	652	779	AAAAACCAGCCAAACCAGTG	60.008	20	AGAAGTAGGCCGCCATGTTA	59.73	20	129	652	780	AAACCAGCCAAACCAGTGAG	60.149	20	GCTTTTCCACAATCATGGGT	59.797	20	280	654	933
TR58778_c0_g1	GTGGTGACTGACCAGCAGAA	59.872	20	GTCACTGAAATCTGCCGTTG	59.293	20	190	2591	2780	GTGGTGACTGACCAGCAGAA	59.872	20	TCACTGAAATCTGCCGTTGT	59.293	20	189	2591	2779	CGAAAAATCCAACTCCGAGA	60.184	20	TGTCACTGAAATCTGCCGTT	59.293	20	225	2557	2781
TR58778_c0_g1	TGGTCAGCGTCACTTAATGC	59.871	20	TCAGTCAGAAGCATGTGTTGTTT	59.834	23	214	3073	3286	CACACAGAGTAATCCGCCAA	59.716	20	TCAGTCAGAAGCATGTGTTGTTT	59.834	23	195	3092	3286	TGGTCAGCGTCACTTAATGC	59.871	20	TCAGTCAGAAGCATGTGTTGTT	58.426	22	214	3073	3286
TR29519_c1_g1	CAACAACAGAATCACAAGCG	57.897	20	CAAATTCTGCGCGAAAATAA	58.951	20	225	695	919	ACAACAACAGAATCACAAGCG	58.84	21	CAAATTCTGCGCGAAAATAA	58.951	20	226	694	919	CAACAACAGAATCACAAGCGT	58.84	21	CAAATTCTGCGCGAAAATAA	58.951	20	225	695	919
TR29519_c1_g1	CGTCACCGATATCTCTGCAA	59.823	20	AGTTGCAGTTCAAAGCGTCT	57.758	20	235	1062	1296	CATTCGGCGGTATATTTTGC	60.303	20	AGTTGCAGTTCAAAGCGTCT	57.758	20	199	1098	1296	TTGCATATACGCTCATTCGG	59.685	20	AGTTGCAGTTCAAAGCGTCT	57.758	20	212	1085	1296
TR36022_c3_g1	CACCTCTCCATCACAGATCAAA	60.111	22	AACTTGCATCCTTCCTGCAC	60.263	20	241	180	420	CACCTCTCCATCACAGATCAA	58.656	21	AACTTGCATCCTTCCTGCAC	60.263	20	241	180	420	AACACCTCTCCATCACAGATCA	59.579	22	AACTTGCATCCTTCCTGCAC	60.263	20	243	178	420
TR9347_c1_g2	GAAGGAGCTCTAGTGCCACG	60.156	20	GATGTGCAACTGGGATGATG	59.925	20	210	1146	1355	GAAGGAGCTCTAGTGCCACG	60.156	20	TGATGTGCAACTGGGATGAT	59.925	20	211	1146	1356	TCCTTGTCTGGCCAAAAGTC	60.232	20	GATGTGCAACTGGGATGATG	59.925	20	249	1107	1355
TR14660_c0_g1	TGTCCACTAAGCTGTAAAGCCA	59.941	22	TCTTCATTTGAATGCGACCA	60.197	20	183	865	1047	GAGAACTAGAACAGAGCCCCAA	59.886	22	TCTTCATTTGAATGCGACCA	60.197	20	106	942	1047	TGTCCACTAAGCTGTAAAGCCA	59.941	22	CTTCATTTGAATGCGACCAA	59.664	20	182	865	1046
TR55454_c1_g1	AGAGAACCTGACTCGGCAAA	59.989	20	TTTTTCCCCACGAAAACAGA	60.452	20	232	546	777	AAGAGAACCTGACTCGGCAA	59.989	20	TTTTTCCCCACGAAAACAGA	60.452	20	233	545	777	ACTCGGCAAAAGCAGACTGT	60.058	20	TTTTTCCCCACGAAAACAGA	60.452	20	222	556	777
TR55454_c1_g1	TGTTTCTTAACAAGGGGATGAA	58.603	22	AAAAACCTGAAATACAGGCACAA	59.926	23	144	971	1114	TGTTTCTTAACAAGGGGATGAAG	59.527	23	AAAAACCTGAAATACAGGCACAA	59.926	23	144	971	1114	TGTTTCTTAACAAGGGGATGAA	58.603	22	AAAACCTGAAATACAGGCACAA	58.676	22	143	971	1113
TR28775_c0_g1	ACACCTTGTCCAGAGATGGG	59.962	20	GCGCATAACAAACAAACCAA	59.608	20	171	227	397	GTCCAGAGATGGGAACCAAA	59.903	20	GCGCATAACAAACAAACCAA	59.608	20	164	234	397	ACACCTTGTCCAGAGATGGG	59.962	20	AGCGCATAACAAACAAACCA	59.23	20	172	227	398
TR45305_c0_g1	CGCTTTTCTCCACTTTCCAG	59.986	20	ATCCCAGAGATATGGGAGGG	60.111	20	227	610	836	TCTGGGCACTCTTGGTCTCT	59.986	20	ATCCCAGAGATATGGGAGGG	60.111	20	255	582	836	CGCTTTTCTCCACTTTCCAG	59.986	20	CCAGAGATATGGGAGGGACA	59.879	20	224	610	833
TR26001_c0_g1	CCTTCAGCCCAGGATCTACA	60.21	20	GGATAAACAAAATGGCTTGAAA	58.176	22	272	45	316	CCTTGCGTCACCAATACTCA	59.716	20	GGATAAACAAAATGGCTTGAAA	58.176	22	186	131	316	CCTTCAGCCCAGGATCTACA	60.21	20	AGGATAAACAAAATGGCTTGAAA	59.08	23	273	45	317
TR26001_c0_g1	TTATCCGGTCTGTCCACCTT	59.405	20	TGTCGTTCCAGACGACAATTT	60.544	21	275	1122	1396	CCAATTATCCGGTCTGTCCA	60.713	20	TGTCGTTCCAGACGACAATTT	60.544	21	279	1118	1396	TATCCGGTCTGTCCACCTTG	60.913	20	TGTCGTTCCAGACGACAATTT	60.544	21	274	1123	1396
TR38228_c0_g1	CCCTATCAGACTGCCCATGT	59.95	20	CATTTTATTATTGTATCACAGGCAAGA	59.748	27	148	1471	1618	ATGCTTCTGGGTCTGAATGG	60.073	20	CATTTTATTATTGTATCACAGGCAAGA	59.748	27	181	1438	1618	ATCATGACTTGGCTGCACTG	59.862	20	CATTTTATTATTGTATCACAGGCAAGA	59.748	27	278	1341	1618
TR46152_c0_g1	TCAAGAATTGAACATCCGCA	60.197	20	GCGCCACAAATCCTTTGTAT	59.967	20	149	168	316	TCAAGAATTGAACATCCGCA	60.197	20	TAGAGCGCCACAAATCCTTT	59.845	20	153	168	320	CAAGAATTGAACATCCGCAA	59.664	20	GCGCCACAAATCCTTTGTAT	59.967	20	148	169	316
TR44889_c5_g2	TGTTCACCTCATGAACCGAG	59.676	20	CATGCACACAGTTTCAAAGC	57.896	20	128	2738	2865	TGTTCACCTCATGAACCGAG	59.676	20	ACATGCACACAGTTTCAAAGC	58.842	21	129	2738	2866	CCTCTTCCCAAAGCATGTTG	60.626	20	CATGCACACAGTTTCAAAGC	57.896	20	273	2593	2865
TR44889_c5_g2	AAATGTCATCCAACTTCGGC	59.939	20	GTGCAGATGCGCACAGTTTA	61.021	20	215	3696	3910	AAATGTCATCCAACTTCGGC	59.939	20	CGCACTTAAAATTTGCGGTA	58.883	20	269	3696	3964	AAATGTCATCCAACTTCGGC	59.939	20	TACGCACTTAAAATTTGCGG	58.883	20	271	3696	3966
TR29826_c2_g1	GATTGAATACTCCAAAACCCCA	60.055	22	CATTCATGAAAATGCCACCA	60.321	20	247	2407	2653	TGATTGAATACTCCAAAACCCC	60.055	22	CATTCATGAAAATGCCACCA	60.321	20	248	2406	2653	TTGAATACTCCAAAACCCCA	57.917	20	CATTCATGAAAATGCCACCA	60.321	20	245	2409	2653
TR17286_c4_g1	ACGTTCGTGAACCAAGCTCT	59.914	20	CCAAATCTGTCCAGTAACCTCC	59.864	22	205	2749	2953	AACGTTCGTGAACCAAGCTC	60.299	20	CCAAATCTGTCCAGTAACCTCC	59.864	22	206	2748	2953	CCAAGCTCTTTGCACTTGCT	60.71	20	CCAAATCTGTCCAGTAACCTCC	59.864	22	194	2760	2953
TR25814_c0_g1	GCATTTGTTGGTGTGGTCAG	60.008	20	CGTTGTGAAGAGTCGTGAACA	59.93	21	226	3239	3464	TGGAACCAATGCAAATCAAA	59.907	20	CGTTGTGAAGAGTCGTGAACA	59.93	21	116	3349	3464	TTGGAACCAATGCAAATCAA	59.907	20	CGTTGTGAAGAGTCGTGAACA	59.93	21	117	3348	3464
TR10373_c2_g1	TGGAGCAACACAAGGGTGTA	60.152	20	TTTGGGAATTTTTATCGGCA	60.254	20	276	1305	1580	TGGAGCAACACAAGGGTGTA	60.152	20	TTGGGAATTTTTATCGGCAA	60.254	20	275	1305	1579	TGGAGCAACACAAGGGTGTA	60.152	20	TTGATGCATTTTTCCCCTTT	59.388	20	238	1305	1542
TR19852_c0_g1	CGTGCTGTTGTTTCCATTGT	59.615	20	GCAAATTATGCACGAGCAAG	59.472	20	146	635	780	CGTGCTGTTGTTTCCATTGT	59.615	20	TGCACGAGCAAGAAATGAGA	60.687	20	138	635	772	AGTTCGTGCTGTTGTTTCCA	59.339	20	GCAAATTATGCACGAGCAAG	59.472	20	150	631	780
TR26511_c0_g1	TGCAGGGTTAAGAATCAGGG	60.066	20	GCTTTGCATGACAATTGGTG	60.119	20	186	4125	4310	ATCACTCACGGCTATGCCTC	60.249	20	GCTTTGCATGACAATTGGTG	60.119	20	280	4031	4310	CACGGCTATGCCTCATGTTA	59.712	20	GCTTTGCATGACAATTGGTG	60.119	20	274	4037	4310
TR57476_c2_g5	GCAGTCCCGTTCATTTGTTT	59.978	20	ATGATTCCAGCTACAACCCG	59.955	20	240	370	609	CTGAATATCGCAGTCCCGTT	60.096	20	ATGATTCCAGCTACAACCCG	59.955	20	249	361	609	TCCCGTTCATTTGTTTTGGT	60.206	20	ATGATTCCAGCTACAACCCG	59.955	20	236	374	609
TR21602_c0_g1	CCGTGTCCCAGTCTTTGTTT	60.005	20	AGAAGCAGGATTGGCTTTCA	59.955	20	260	1158	1417	CCGTGTCCCAGTCTTTGTTT	60.005	20	CCGAGTCGGACTGATACCAT	59.95	20	161	1158	1318	CCGTGTCCCAGTCTTTGTTT	60.005	20	ACAGGAAGGCCTTTGTCAGA	59.844	20	123	1158	1280
TR51510_c0_g2	TTGTTTCAGCAGTTGCTGTCT	58.715	21	ACGACCGCTGAACTATGGTC	60.142	20	255	1026	1280	TTGTTTCAGCAGTTGCTGTCT	58.715	21	CGACCGCTGAACTATGGTCT	60.277	20	254	1026	1279	TTGTTTCAGCAGTTGCTGTCT	58.715	21	TAACTTTCGCGAGGAGAACG	60.514	20	272	1026	1297
TR26574_c1_g1	TCCAAAGTTGTCTTCCCAGG	60.081	20	AGTTGGAAGGAGACCCGTTT	59.972	20	256	87	342	TCCAAAGTTGTCTTCCCAGG	60.081	20	GACCCGTTTACATTGCCATC	60.199	20	245	87	331	CACACAGTTGTCTGCCCATT	59.597	20	AGTTGGAAGGAGACCCGTTT	59.972	20	231	112	342
TR46983_c0_g1	CGTATGGTTGGACGGACTCT	59.989	20	TTGCACAAATTTAGCCCACA	60.111	20	250	70	319	TGCCACAAGATTTGGATGAA	60.049	20	TTGCACAAATTTAGCCCACA	60.111	20	270	50	319	TTGATGCCACAAGATTTGGA	60.049	20	TTGCACAAATTTAGCCCACA	60.111	20	274	46	319
TR55214_c0_g1	CCCAAATCAGGGTTATGTTGA	59.671	21	TGCTTGAATGTGCTAAAATTGG	60.13	22	269	234	502	CCCATACATTCAGCAGTAAAGC	58.789	22	AAGTGGAACCCCAGGATTGT	60.607	20	237	362	598	CCCATACATTCAGCAGTAAAGC	58.789	22	AGTGGAACCCCAGGATTGTA	59.259	20	236	362	597
TR54558_c0_g1	TGCTAGTTAATACAGGAGGATTTGC	60.059	25	ATCAGAAGGCACGGATGTGT	60.542	20	264	697	960	TGCTAGTTAATACAGGAGGATTTGC	60.059	25	GATCCTGATCAGAAGGCACG	60.769	20	271	697	967	TGCTAGTTAATACAGGAGGATTTGC	60.059	25	CGGATGTGTCGGATCTAGTG	59.112	20	253	697	949
TR31972_c1_g12	CAAGGGAAAAGCTGTCTTCG	59.986	20	CGTCACGGGAAAAGGGTACT	61.282	20	250	482	731	CAAGGGAAAAGCTGTCTTCG	59.986	20	CGGGAAAAGGGTACTTTCAG	58.692	20	245	482	726	CAAGGGAAAAGCTGTCTTCG	59.986	20	TCACGGGAAAAGGGTACTTTC	60.338	21	248	482	729
TR54010_c2_g1	GAATTTTCCCGTTGCTGAAC	59.551	20	CAAAGCATGCGTTCAAAGTG	60.436	20	257	64	320	GATTTGGAATTTTCCCGTTG	59.25	20	CAAAGCATGCGTTCAAAGTG	60.436	20	263	58	320	TGATTTGGAATTTTCCCGTT	59.25	20	CAAAGCATGCGTTCAAAGTG	60.436	20	264	57	320
TR34602_c2_g1	ACAAACGGTGTTGGTCGAAT	60.277	20	CGGTTGTTACACCTGAGATCAA	60.03	22	277	1857	2133	CAAACGGTGTTGGTCGAATA	59.439	20	CGGTTGTTACACCTGAGATCAA	60.03	22	276	1858	2133	ACAAACGGTGTTGGTCGAAT	60.277	20	CACCTGAGATCAAGACTGCTG	58.608	21	268	1857	2124
TR2769_c0_g1	GGTTCGCTTGATTCTTGCTC	59.962	20	TGCTGTGAACACATGGTGAA	59.705	20	163	1094	1256	GGTTCGCTTGATTCTTGCTC	59.962	20	TTGCTGTGAACACATGGTGA	59.705	20	164	1094	1257	ACCATGAAAACCCATTGCAT	60.059	20	TGCTGTGAACACATGGTGAA	59.705	20	217	1040	1256
TR26647_c0_g4	AACATGATGCGCAACCACT	60.136	19	CCGAGCATGCAATACTTTGA	59.833	20	280	335	614	ATGCGCAACCACTGCATAAT	61.451	20	CCGAGCATGCAATACTTTGA	59.833	20	274	341	614	ATGCGCAACCACTGCATAAT	61.451	20	TTCAAACCGAGCATGCAATA	60.215	20	280	341	620
TR12823_c1_g1	GAAAATTTGGGTTGGGAATG	59.111	20	TCCTCCACAAACCAGGAATC	59.903	20	157	868	1024	AAAATTTGGGTTGGGAATGA	59.111	20	TCCTCCACAAACCAGGAATC	59.903	20	156	869	1024	AGAAAATTTGGGTTGGGAATG	60.041	21	TCCTCCACAAACCAGGAATC	59.903	20	158	867	1024
TR38806_c0_g1	CTGCCTTCAATACCTGCCAT	60.096	20	CAATTCAGGCCGAGTGTGTA	59.716	20	101	2136	2236	AATGGTCCTATGCATCCCAA	60.155	20	CAATTCAGGCCGAGTGTGTA	59.716	20	154	2083	2236	GTCCTATGCATCCCAACCAC	60.203	20	CAATTCAGGCCGAGTGTGTA	59.716	20	150	2087	2236
TR15993_c0_g1	ACAACTCTGACGCTCGGTTT	59.914	20	GCGTTAGCTTTCTCATTGCC	59.988	20	273	934	1206	AACAACTCTGACGCTCGGTT	59.914	20	GCGTTAGCTTTCTCATTGCC	59.988	20	274	933	1206	CAACTCTGACGCTCGGTTTT	60.431	20	GCGTTAGCTTTCTCATTGCC	59.988	20	272	935	1206
TR57695_c0_g1	TCTCCCTTTTTCTCTCTCCG	58.592	20	AGTAGGCCCCCTAATTCCCT	60.163	20	277	602	878	TCTCCCTTTTTCTCTCTCCGT	59.447	21	AGTAGGCCCCCTAATTCCCT	60.163	20	277	602	878	GTCTCCCTTTTTCTCTCTCCG	59.447	21	AGTAGGCCCCCTAATTCCCT	60.163	20	278	601	878
TR25507_c50_g35	CCATGGTTACCCATTCTCCA	60.572	20	ATACAAGCAGGTGCGAAAGC	60.416	20	272	579	850	CCATGGTTACCCATTCTCCA	60.572	20	AAAAAGGCATGCTGTGTTCA	59.322	20	149	579	727	CCATGGTTACCCATTCTCCA	60.572	20	TACAAGCAGGTGCGAAAGC	60.15	19	271	579	849
TR26022_c0_g1	TACCAACAATGCTCGGAATG	59.542	20	GGTCAAGGTTCCTGCTCTGA	60.386	20	279	285	563	TACCAACAATGCTCGGAATG	59.542	20	TCAAGGTTCCTGCTCTGACC	60.386	20	277	285	561	TACCAACAATGCTCGGAATG	59.542	20	GGCCATGTTCTAGGTTCCTG	59.55	20	248	285	532
TR21813_c3_g1	ATTCTCCAAAGGGGAATGAA	58.427	20	TTTTCAGGCAACTTCCCATC	60.051	20	107	179	285	TGATGTATTCTCCAAAGGGGA	59.373	21	TTTTCAGGCAACTTCCCATC	60.051	20	113	173	285	TGATGTATTCTCCAAAGGGGA	59.373	21	GCACCATTTTCAGGCAACTT	60.118	20	119	173	291
TR23479_c0_g1	AGGAGATGTGAGGTGGATGC	60.08	20	ATATTCACCAATGCTTGCCC	59.791	20	208	2279	2486	AACCGGATACGGATGGAAAT	60.399	20	ATATTCACCAATGCTTGCCC	59.791	20	249	2238	2486	ACCAGAAAGGCAAAGAATGC	59.316	20	ATATTCACCAATGCTTGCCC	59.791	20	270	2217	2486
TR2985_c0_g1	CATGTGCGTCGGAAGTGTTA	60.72	20	AATCGTTGTGTGTTTTGCCA	60.011	20	231	550	780	GCGTCGGAAGTGTTATAGTCG	59.783	21	AATCGTTGTGTGTTTTGCCA	60.011	20	226	555	780	AGACCGAGCCAAACAATCAT	59.556	20	ATCGTTGTGTGTTTTGCCAT	58.903	20	280	500	779
TR35292_c0_g1	TCATGATGTAAAAGGTTAAGCCTAGA	59.631	26	TGTAATGAGGCGGGAGGATA	60.427	20	277	93	369	TCATGATGTAAAAGGTTAAGCCTAGA	59.631	26	ATGTAATGAGGCGGGAGGAT	60.682	20	278	93	370	CATGATGTAAAAGGTTAAGCCTAGA	58.088	25	TGTAATGAGGCGGGAGGATA	60.427	20	276	94	369
TR38242_c5_g1	CAGCCATATACCATGGATTGAA	59.682	22	AGCTGTCTTGATAGGGAAGCA	59.091	21	270	580	849	CAGCCATATACCATGGATTGAA	59.682	22	GCTGTCTTGATAGGGAAGCA	58.048	20	269	580	848	CTTCTTTGATGAATGTGTTTGC	57.424	22	TTTGACAGCAAGGTCATGGA	60.24	20	207	757	963
TR17311_c0_g1	CCCAGCAAAAATTCAACCAT	59.801	20	AGGACGACGACTTCTGAGGA	59.986	20	202	404	605	CCCAGCAAAAATTCAACCAT	59.801	20	GACGACGACTTCTGAGGAGG	59.986	20	200	404	603	CCCAGCAAAAATTCAACCAT	59.801	20	AAGGACGACGACTTCTGAGG	59.45	20	203	404	606
TR14766_c0_g1	GCCAGAAGCGTTTTGTTTTC	59.867	20	GTTCTGGCCATCAGTTTTCC	59.532	20	211	286	496	ATTCATTGAGCCAGAAGCGT	59.843	20	GTTCTGGCCATCAGTTTTCC	59.532	20	220	277	496	GCCAGAAGCGTTTTGTTTTC	59.867	20	GCCATCAGTTTTCCAACCAG	60.495	20	205	286	490
TR14766_c0_g1	AGCCAATTCTTTGCCTGCTA	59.982	20	TGCAAGTAGTGGAAGGCTGA	59.591	20	228	681	908	GATTGAATACGCCAGCCAAT	59.929	20	TGCAAGTAGTGGAAGGCTGA	59.591	20	241	668	908	TTGCCTGCTAGAGCTCCAAT	60.118	20	TGCAAGTAGTGGAAGGCTGA	59.591	20	218	691	908
TR40082_c0_g1	ACCCCGGGTTGTTACATTTT	60.332	20	AATTTGTGCCCATTTGAAGAA	59.442	21	272	661	932	ACCCCGGGTTGTTACATTTT	60.332	20	AATTTGTGCCCATTTGAAGA	58.066	20	272	661	932	ACCCCGGGTTGTTACATTTT	60.332	20	ATTTGTGCCCATTTGAAGAA	58.066	20	271	661	931
TR40082_c0_g1	TTCAGAAATGATTTTTCTGTTGTCA	60.03	25	GGTATCGTATGCATCTCTTTACG	57.885	23	269	1129	1397	TTCAGAAATGATTTTTCTGTTGTCA	60.03	25	AGGTATCGTATGCATCTCTTTACG	58.803	24	270	1129	1398	TCAGAAATGATTTTTCTGTTGTCA	58.787	24	GGTATCGTATGCATCTCTTTACG	57.885	23	268	1130	1397
TR28949_c0_g2	TGGGAAGGAGAGTCAAATGG	60.042	20	TGACAAATGAATCTGTTTGTAGGAA	59.926	25	213	2099	2311	TGGGAAGGAGAGTCAAATGG	60.042	20	TTGACAAATGAATCTGTTTGTAGGA	59.926	25	214	2099	2312	CCATGGGAAGGAGAGTCAAA	60.042	20	TGACAAATGAATCTGTTTGTAGGAA	59.926	25	216	2096	2311
TR32837_c0_g1	TTTTTGCTTGTTTCTGCCAA	59.462	20	TGATACCCAACATTCAGGCA	59.924	20	160	634	793	TTTTGCTTGTTTCTGCCAAA	59.462	20	TGATACCCAACATTCAGGCA	59.924	20	159	635	793	CCAGCCATATATGTGCCAAA	59.401	20	GGCACTTTGTTTTCGGTGTT	60.015	20	261	656	916
TR6768_c0_g2	CATCACCAACAAACTTTGCG	60.149	20	GGTTTCTCGCATTCGCTCTA	60.49	20	211	1291	1501	CATACATCGATTTGGCTCCC	60.296	20	GGTTTCTCGCATTCGCTCTA	60.49	20	238	1264	1501	CGGCTCTAGATATGCTGCCT	59.597	20	GGTTTCTCGCATTCGCTCTA	60.49	20	193	1309	1501
TR54338_c0_g2	TGATTCAATGGGACCAGGTT	60.173	20	GAGGACTAGGCATGATTGGG	59.508	20	191	684	874	TGATTCAATGGGACCAGGTT	60.173	20	CCTGGCCTGGTTTCATCATA	60.853	20	251	684	934	TCAATGGGACCAGGTTATGG	60.572	20	GAGGACTAGGCATGATTGGG	59.508	20	187	688	874
TR46175_c0_g1	TTCACTGCACAACTTCACACA	58.908	21	GGAACATGGCAGATGTTTGG	61.309	20	247	972	1218	TTTCACTGCACAACTTCACACA	60.384	22	GGAACATGGCAGATGTTTGG	61.309	20	248	971	1218	GCACAACTTCACACATTAACTGC	59.735	23	GAACATGGCAGATGTTTGGA	59.502	20	240	978	1217
TR11380_c0_g1	TTTTTCCGGTGGATTGTCAT	60.17	20	ACCATGTTGGTTGGTTTCGT	60.134	20	207	827	1033	TCTTTTTCGGCTTTGATCGT	59.823	20	ACCATGTTGGTTGGTTTCGT	60.134	20	143	891	1033	TTTTCGGCTTTGATCGTTTC	60.188	20	ACCATGTTGGTTGGTTTCGT	60.134	20	140	894	1033
TR30088_c0_g1	TTTTGTCTGGAGAGCTGCCT	60.134	20	CAGCACAATATCATCAGAAGCA	58.945	22	276	313	588	TTTTGTCTGGAGAGCTGCCT	60.134	20	GCACAGCACAATATCATCAGAA	58.801	22	279	313	591	TTTTGTCTGGAGAGCTGCCT	60.134	20	AGCACAGCACAATATCATCAGAA	59.789	23	280	313	592
TR51525_c1_g1	TCTTGATCTGTGAAAGCCGA	59.522	20	AGCAACTGCAGCAACAAATG	60.058	20	267	1120	1386	TCTTGATCTGTGAAAGCCGA	59.522	20	CAGCAACTGCAGCAACAAAT	60.058	20	268	1120	1387	TCTTGATCTGTGAAAGCCGA	59.522	20	CAACTGCAGCAACAAATGCT	60.058	20	265	1120	1384
TR38307_c0_g8	TTGAAACCAGGCGTTAAACC	59.975	20	TCGACTGGTGAATTCCATGA	60.048	20	231	21	251	CCTAGCTGTTGAAACCAGGC	59.875	20	TCGACTGGTGAATTCCATGA	60.048	20	239	13	251	TTGAAACCAGGCGTTAAACC	59.975	20	TGAAAATTCGTCGACTGGTG	59.691	20	241	21	261
TR49804_c0_g1	AACGAAAAGTTTTTCAACAGAGC	59.027	23	CAGCTCTATCTTCACAGCAAGC	59.429	22	239	466	704	ACGAAAAGTTTTTCAACAGAGC	57.741	22	CAGCTCTATCTTCACAGCAAGC	59.429	22	238	467	704	TGAACAACGAAAAGTTTTTCAAC	58.382	23	CAGCTCTATCTTCACAGCAAGC	59.429	22	244	461	704
TR21360_c0_g1	TTGATGGGACAAGGAAGAGG	60.042	20	GCAGTGAGGCAAGGAGACTT	59.604	20	271	1187	1457	GGACAAGGAAGAGGCAGAAA	59.405	20	TTCAGCATTCTGCAGTGAGG	60.136	20	276	1193	1468	GTGGTGGACGTGATCCTTTT	59.827	20	TTTTTCCCATCATCCCCTCT	60.632	20	271	1086	1356
TR32158_c0_g1	GATCACAAACTCCGGGAGAG	59.655	20	TCAAGAGACGGCTTTGGATT	59.813	20	198	1565	1762	GGCACCAGGTTACAGCAAAC	60.559	20	TCAAGAGACGGCTTTGGATT	59.813	20	272	1491	1762	GATCACAAACTCCGGGAGAG	59.655	20	CAAGAGACGGCTTTGGATTG	60.766	20	197	1565	1761
TR32158_c0_g1	TTGTCAATTTGTGAATTGGAACT	58.528	23	CGACTTGTCAAGCAAAACGA	60.027	20	213	2689	2901	TTGTCAATTTGTGAATTGGAACT	58.528	23	TCGACTTGTCAAGCAAAACG	60.027	20	214	2689	2902	TTGTCAATTTGTGAATTGGAAC	57.515	22	CGACTTGTCAAGCAAAACGA	60.027	20	213	2689	2901
TR46707_c0_g1	GAGCTCGGCTGGAGTGTATC	59.981	20	AGAGGCTCAACGACACTGTATAA	58.099	23	200	2051	2250	GAGCTCGGCTGGAGTGTATC	59.981	20	GAGGCTCAACGACACTGTATAA	57.063	22	199	2051	2249	ACCGTGACCTCACCATCAAT	60.246	20	AGAGGCTCAACGACACTGTATAA	58.099	23	265	1986	2250
TR26550_c0_g1	TTACCTCCCCACCCCTCTAC	60.183	20	GGGTGTGGTCAGGGATAGAA	59.779	20	257	443	699	CCAATCCACTACCGATGTCC	60.195	20	GGGTGTGGTCAGGGATAGAA	59.779	20	216	484	699	CCCAATCCACTACCGATGTC	60.195	20	GGGTGTGGTCAGGGATAGAA	59.779	20	217	483	699
TR11924_c0_g2	TCAAATGCAAGTTCCGAGTG	59.84	20	CCTGGAACAGAAATGTCAGC	58.287	20	280	599	878	TCAAATGCAAGTTCCGAGTG	59.84	20	CTGGAACAGAAATGTCAGCAA	58.912	21	279	599	877	TCAAATGCAAGTTCCGAGTG	59.84	20	GGAACAGAAATGTCAGCAATCA	60.118	22	277	599	875
TR11924_c0_g2	CCAAACTTACATGCTGTGCTG	59.401	21	ATTCGATGGCACCCATACAT	60.043	20	246	933	1178	GCTGACATTTCTGTTCCAGG	58.287	20	CTGAGGTGGGGCAAATTTTA	59.931	20	171	859	1029	CACCAAACTTACATGCTGTGC	59.259	21	ATTCGATGGCACCCATACAT	60.043	20	248	931	1178
TR30255_c0_g1	TGGTGTCCAAAACTTCGAGA	59.262	20	ACCTTGCACATATTGCACCA	59.995	20	251	1127	1377	TGGTGTCCAAAACTTCGAGA	59.262	20	AGGTGTGCTAGCAGAGGGAA	60.012	20	228	1127	1354	TGGTGTCCAAAACTTCGAGA	59.262	20	GGTGTGCTAGCAGAGGGAAG	60.012	20	227	1127	1353
TR14394_c0_g2	TCGTTCACGAAGTTCTTCCC	60.232	20	TTCCAAAGCATACAGGGGAC	59.933	20	135	196	330	CCACGGAGATCATTGGAAAT	59.75	20	TTCCAAAGCATACAGGGGAC	59.933	20	230	101	330	CTTCCGTCGTTCACGAAGTT	60.291	20	TTCCAAAGCATACAGGGGAC	59.933	20	141	190	330
TR27917_c0_g1	GAAAGCAGGAGAGGCAGTTG	60.134	20	TTGCGAAATGCAAAAGAAGT	58.558	20	205	761	965	CAGGAGAGGCAGTTGCTCAT	60.555	20	TTGCGAAATGCAAAAGAAGT	58.558	20	200	766	965	GAAAGCAGGAGAGGCAGTTG	60.134	20	ATTGCGAAATGCAAAAGAAG	58.044	20	206	761	966
TR39277_c2_g1	CCGTTTTCCCACTAAATCCA	59.795	20	ACATTGGTAAACGAGACCGC	60	20	276	984	1259	CCGTTTTCCCACTAAATCCA	59.795	20	CATTGGTAAACGAGACCGCT	60.132	20	275	984	1258	TTTGTGTTTTCCGTTTTCCC	59.817	20	CTTTCCAATTACGCATCGCT	60.23	20	267	974	1240
TR43723_c2_g7	CGGATTTCTCATAACCTAATTTGT	57.781	24	TTGTGTCATACTTGCGGGAA	60.111	20	257	0	256	CGGATTTCTCATAACCTAATTTGT	57.781	24	AAATGGTGGCACGGTAACTC	59.859	20	140	0	139	CGGATTTCTCATAACCTAATTTGT	57.781	24	AGAAGTTCCGCCACTTGTGT	59.769	20	271	0	270
TR6629_c0_g1	GGCCTCTATAGCTGCCTCCT	59.968	20	TATAACCCCAGCACGAGGAC	59.955	20	228	1947	2174	TTTGAAGCTGGCTCATCCTT	59.955	20	TATAACCCCAGCACGAGGAC	59.955	20	152	2023	2174	TTTTGAAGCTGGCTCATCCT	59.955	20	TATAACCCCAGCACGAGGAC	59.955	20	153	2022	2174
TR41548_c0_g1	TTCACACTGTCAGGCTCCAC	59.872	20	GAGTACCAAATGGCCAGGAA	59.933	20	239	2271	2509	GTTCACACTGTCAGGCTCCA	59.872	20	GAGTACCAAATGGCCAGGAA	59.933	20	240	2270	2509	ATCCCCAATGGACACTTTGA	60.173	20	GAGTACCAAATGGCCAGGAA	59.933	20	108	2402	2509
TR32100_c0_g2	GGTCAGCCAACAACCTGTTT	60.012	20	TGGCATGTTCGAAGTTTACG	59.729	20	180	760	939	CGACGCATGTACAGTTCACC	60.183	20	TGGCATGTTCGAAGTTTACG	59.729	20	120	820	939	CACAGGTAACAGGTCAGCCA	59.745	20	AGGAGAAAGTGGCATGTTCG	60.255	20	200	749	948
TR23377_c0_g1	CACCAACAGCCAAGGAAACT	60.149	20	TTGAGCCAGTGACATTGCAG	61.023	20	226	85	310	CACCAACAGCCAAGGAAACT	60.149	20	TGAGCCAGTGACATTGCAG	59.531	19	225	85	309	CACCAACAGCCAAGGAAACT	60.149	20	AATGGTTGAGCCAGTGACATT	59.468	21	231	85	315
TR55511_c0_g2	CTGACCAGATAGACGCGACA	60.008	20	CCCATTAACTGGCGACTGAT	59.955	20	160	44	203	CTGACCAGATAGACGCGACA	60.008	20	GTGAATTTGGAAAGGCCTCA	60.051	20	243	44	286	CGACAAGGGAACCTTTACCA	59.964	20	CCCATTAACTGGCGACTGAT	59.955	20	145	59	203
TR32095_c0_g1	TTGACCATGCATTTATTTCACA	58.936	22	CAGCTAACAAAACCGCCATT	60.131	20	120	14	133	TGACCATGCATTTATTTCACAA	58.936	22	CAGCTAACAAAACCGCCATT	60.131	20	119	15	133	TTGACCATGCATTTATTTCACAA	60.232	23	CAGCTAACAAAACCGCCATT	60.131	20	120	14	133
TR32698_c0_g1	GGAGAGTTTGGCATTTGGAA	60.051	20	TGTTCACCCAATCATGCAAT	59.781	20	268	1215	1482	AGGAGAGTTTGGCATTTGGA	59.67	20	TGTTCACCCAATCATGCAAT	59.781	20	269	1214	1482	GGAGAGTTTGGCATTTGGAA	60.051	20	CTGTTCACCCAATCATGCAA	60.517	20	269	1215	1483
TR23684_c0_g1	CAGGAAAAACTTCCCGTGTC	59.569	20	TTGAGAAATGCACTGAGCCA	60.539	20	242	773	1014	AGGAAAAACTTCCCGTGTCA	59.569	20	TTGAGAAATGCACTGAGCCA	60.539	20	241	774	1014	CAGGAAAAACTTCCCGTGTC	59.569	20	CAGGCGGCAGAAATGATAAC	60.606	20	224	773	996
TR39147_c1_g1	CATTTGATGCCAAAGTAAATGTG	59.415	23	CAACCGAGACAAAACTACCCA	60.016	21	235	857	1091	TTGATGCCAAAGTAAATGTGTTC	59.046	23	CAACCGAGACAAAACTACCCA	60.016	21	232	860	1091	TTGATGCCAAAGTAAATGTGTTCT	59.939	24	CAACCGAGACAAAACTACCCA	60.016	21	232	860	1091
TR10676_c2_g1	CCAGATGTTGGTTGGAATTTT	58.798	21	AAGTGCATGCCCTGGTAAAT	59.457	20	201	364	564	ACCAGATGTTGGTTGGAATTTT	59.615	22	AAGTGCATGCCCTGGTAAAT	59.457	20	202	363	564	CCAGATGTTGGTTGGAATTTTA	58.852	22	AAGTGCATGCCCTGGTAAAT	59.457	20	201	364	564
TR38805_c0_g1	TGCTGAAAGAATGATGCCAA	60.343	20	TCGTTTATTATGATGCTGCAAA	58.388	22	258	2857	3114	TGCTGAAAGAATGATGCCAA	60.343	20	CTCGTTTATTATGATGCTGCAAA	59.314	23	259	2857	3115	TGCTGAAAGAATGATGCCAA	60.343	20	TGATGCTGCAAAATATTAACCAC	59.06	23	248	2857	3104
TR38805_c0_g1	AGTGCTTGCACTGATTCAAAA	58.568	21	TTCTTGTCACATGACACATACTTTG	59.121	25	245	3582	3826	TGCTTGCACTGATTCAAAAC	57.473	20	TTCTTGTCACATGACACATACTTTG	59.121	25	243	3584	3826	GTGCTTGCACTGATTCAAAA	57.473	20	TTCTTGTCACATGACACATACTTTG	59.121	25	244	3583	3826
TR36152_c0_g1	CTGCAAGTAGCAGATTCCCC	59.836	20	TGTTTGCACATGGGATAGGA	59.924	20	276	509	784	TGCAAGTAGCAGATTCCCCT	59.836	20	TGTTTGCACATGGGATAGGA	59.924	20	275	510	784	CTGCAAGTAGCAGATTCCCC	59.836	20	CTGTTTGCACATGGGATAGG	58.999	20	277	509	785
TR26692_c1_g1	AAGATCGCACTGATGCACAC	59.87	20	CTCATTGCCTCAGGTGAACA	59.831	20	263	610	872	AAGATCGCACTGATGCACAC	59.87	20	CATTGCCTCAGGTGAACAAA	59.691	20	261	610	870	TGAAAGAAAGCAAGATCGCA	59.688	20	CTCATTGCCTCAGGTGAACA	59.831	20	274	599	872
TR31115_c0_g1	TTGTGGGGGCATAAACAAAT	60.053	20	GCAAACATAGCTCGAGTTGACA	60.449	22	276	743	1018	TTGTGGGGGCATAAACAAAT	60.053	20	GCTCGAGTTGACAGTTTGAACA	60.474	22	267	743	1009	GTTGTGGGGGCATAAACAAA	60.597	20	GCAAACATAGCTCGAGTTGACA	60.449	22	277	742	1018
TR10667_c0_g1	TAAAGTAGCCAGCAGAGCGG	60.669	20	TCGTTTTGCACCTGTCGTTA	60.293	20	125	1496	1620	CAGTGCACAGGCACAATGTT	60.79	20	TCGTTTTGCACCTGTCGTTA	60.293	20	183	1438	1620	TAAAGTAGCCAGCAGAGCGG	60.669	20	ATCGTTTTGCACCTGTCGTT	60.559	20	126	1496	1621
TR31999_c0_g1	TGAAGGGCGACAAAAAGTTC	60.227	20	GGAAAAATGAGCAAGTGTCCA	60.103	21	241	50	290	ACAAATGAAGGGCGACAAAA	60.481	20	GGAAAAATGAGCAAGTGTCCA	60.103	21	246	45	290	AAATGAAGGGCGACAAAAAG	59.202	20	GGAAAAATGAGCAAGTGTCCA	60.103	21	244	47	290
TR31999_c0_g1	TGCAGACTTATCGGCAGTTG	60.011	20	ATGCATTGTGCTGGTGAAAA	60.119	20	183	625	807	CACGCAGAAAGGGTCTTAGC	60.015	20	ATGCATTGTGCTGGTGAAAA	60.119	20	149	659	807	CGCAGAAAGGGTCTTAGCTG	60.147	20	ATGCATTGTGCTGGTGAAAA	60.119	20	147	661	807
TR57126_c0_g1	CGGTTTTCGTTTGGTTTTGT	59.876	20	TTACTCTTGTGCCGATTCCC	60.074	20	250	620	869	CAATCGGTTTTCGTTTGGTT	59.839	20	TTACTCTTGTGCCGATTCCC	60.074	20	254	616	869	CGGTTTTCGTTTGGTTTTGT	59.876	20	GATTCCCTCGCTGTCTGTGT	60.269	20	237	620	856
TR56758_c0_g1	CGGAAACGGTCCAGTTTTTA	59.968	20	GGATCCTGTCCTGGTAGCAA	60.073	20	279	437	715	TTCCTACACCCAATGAAGGC	59.933	20	GGATCCTGTCCTGGTAGCAA	60.073	20	206	510	715	CCTACACCCAATGAAGGCAT	59.813	20	GGATCCTGTCCTGGTAGCAA	60.073	20	204	512	715
TR26032_c0_g1	TGAGATGTGACCTAAAGCGG	58.874	20	ACCGTAACTGTGGGGACTCA	60.422	20	276	794	1069	GTGAGATGTGACCTAAAGCGG	59.749	21	ACCGTAACTGTGGGGACTCA	60.422	20	277	793	1069	TGAGATGTGACCTAAAGCGGT	59.749	21	ACCGTAACTGTGGGGACTCA	60.422	20	276	794	1069
TR51722_c3_g1	CAAGCAATGCTATGTTTGAATC	57.483	22	GACCAAAAAGCTGAGCATTACA	59.406	22	280	752	1031	TTCACTTGGAAATACAAGCAATG	59.175	23	CACATCTGAAACAATGAGTTTGC	59.668	23	263	738	1000	TTCACTTGGAAATACAAGCAATG	59.175	23	TGAAACAATGAGTTTGCAGAAA	58.464	22	257	738	994
TR12896_c1_g1	TCATTGACGAGTTGACGAGC	59.992	20	ACGCAGCAAAGAGAAACCTG	60.571	20	196	741	936	GGCGTAAGTTTCGAGAATCG	59.845	20	ACGCAGCAAAGAGAAACCTG	60.571	20	216	721	936	GTTTAGCCGCAAGTTTACCG	59.779	20	TGCCAACTGCTTGAGACATT	59.445	20	254	841	1094
TR39264_c3_g1	GCGAAAGCCGTTTAAGTTTG	59.89	20	AACTTTTGCACAGTTTGGTCAG	59.328	22	213	3457	3669	GCGAAAGCCGTTTAAGTTTG	59.89	20	AACTTTTGCACAGTTTGGTCA	58.323	21	213	3457	3669	GCGAAAGCCGTTTAAGTTTG	59.89	20	CTTTTGCACAGTTTGGTCAGT	57.927	21	211	3457	3667
TR48769_c0_g1	GGAAGAAAGAACCAGAGGGC	60.19	20	TAAGCTCGGGCATGCTAAAT	59.838	20	261	726	986	GGAAGAAAGAACCAGAGGGC	60.19	20	GCAGGTCCAGGTTATGGGTA	59.813	20	279	726	1004	TACCACACGATAGCAAACCG	59.609	20	ACCAGCAGGTCCAGGTTATG	59.989	20	119	890	1008
TR40276_c0_g1	TGTTTGTCAATTTTCATTAACCG	58.946	23	TGCAGCTCAGCAGAATGAGT	59.887	20	261	2440	2700	TGTTTGTCAATTTTCATTAACCG	58.946	23	GTGCAGCTCAGCAGAATGAG	59.887	20	262	2440	2701	TTGTTTGTCAATTTTCATTAACCG	60.139	24	TGCAGCTCAGCAGAATGAGT	59.887	20	262	2439	2700
TR30055_c0_g1	ATTGTTCACAGCAAATCGGG	60.894	20	AGAGGGGTTGAGTGTGGTTG	60.002	20	193	72	264	ATTGTTCACAGCAAATCGGG	60.894	20	CAGAGGGGTTGAGTGTGGTT	60.002	20	194	72	265	ATTGTTCACAGCAAATCGGG	60.894	20	ATCCAGAGGGGTTGAGTGTG	59.962	20	197	72	268
TR11821_c0_g1	CCTTGGGCACTGATCAGACT	60.261	20	GCTGCTAAATGAACCTGGCT	59.481	20	207	59	265	CCTTGGGCACTGATCAGACT	60.261	20	TGCTAAATGAACCTGGCTGA	59.42	20	205	59	263	TTGGGCACTGATCAGACTGT	59.261	20	GCTGCTAAATGAACCTGGCT	59.481	20	205	61	265
TR29862_c0_g1	TGACAGAAGTTGTCTCCCCTG	60.282	21	GCAGGAAAAGCAGTTAAAGGA	58.64	21	121	517	637	TGACAGAAGTTGTCTCCCCTG	60.282	21	CAGCAGGAAAAGCAGTTAAAGG	60.406	22	123	517	639	TGACAGAAGTTGTCTCCCCTG	60.282	21	AGCAGGAAAAGCAGTTAAAGGA	59.561	22	122	517	638
TR36028_c1_g2	ATCCAAGAATTGGCCAACAG	59.933	20	AGCAGCCTTCGTGTTCATCT	60.02	20	261	882	1142	CCAAGAATTGGCCAACAGAT	59.933	20	AATGAAGCAGCCTTCGTGTT	59.882	20	264	884	1147	ATCCAAGAATTGGCCAACAG	59.933	20	AATGAAGCAGCCTTCGTGTT	59.882	20	266	882	1147
TR12823_c0_g1	TGATGATGCTGGGAATGGTA	59.883	20	ATCATCACCATCCTCGTCGT	60.358	20	157	123	279	GATGCTGCTGCTGAAGATGA	60.257	20	ATCATCACCATCCTCGTCGT	60.358	20	221	59	279	TGATGCTGGGAATGGTATTG	59.35	20	TCTTCAGCAGCAGCATCATC	60.257	20	180	126	305
TR12823_c0_g1	ACGATGACGATGACGATGAC	59.51	20	ATTAATCGCAAACTCGTCCG	60.096	20	152	482	633	ATGACGATGACGATGACGAC	59.51	20	ATTAATCGCAAACTCGTCCG	60.096	20	149	485	633	AGGTGATGATGACGATGACG	59.505	20	ATTAATCGCAAACTCGTCCG	60.096	20	163	471	633
TR37607_c0_g3	TGAACCAAAAACCATCGTGA	59.941	20	CCAGTCACCGACAAAACCTT	60.005	20	200	1232	1431	TGAACCAAAAACCATCGTGA	59.941	20	CTCCAGTCACCGACAAAACC	60.545	20	202	1232	1433	TGAACCAAAAACCATCGTGA	59.941	20	TCCAGTCACCGACAAAACCT	60.545	20	201	1232	1432
TR11948_c0_g1	GCAATGGCAGAACATGAAGA	59.805	20	AGTGTGCAGAACTTTGTGGC	58.935	20	275	1093	1367	GCAATGGCAGAACATGAAGA	59.805	20	CAGAACTTTGTGGCCGAGTA	58.923	20	269	1093	1361	GCAATGGCAGAACATGAAGA	59.805	20	TGGCCGAGTATAGTTAAGGCA	59.75	21	259	1093	1351
TR6768_c0_g4	CATCACCAACAAACTTTGCG	60.149	20	TTTTATGCTTTCGCGCTTTT	59.989	20	211	1291	1501	CATCACCAACAAACTTTGCG	60.149	20	AATTCAGCTCTCGGTGAGGA	59.95	20	245	1291	1535	CATCACCAACAAACTTTGCG	60.149	20	ATTCAGCTCTCGGTGAGGAA	59.95	20	244	1291	1534
TR14713_c0_g1	GTCAGCAGACGACAGAAGGC	61.167	20	CCTTTGACATGCAACATTGG	59.964	20	188	370	557	GAGTCAGCAGACGACAGAAGG	60.189	21	CCTTTGACATGCAACATTGG	59.964	20	190	368	557	GTCAGCAGACGACAGAAGGC	61.167	20	ACCTTGGAAAAATCGCTCCT	60.074	20	161	370	530
TR50799_c3_g4	CAATGAAGGGCCATGAGAAT	59.894	20	TGGTATGCTCTCCACACACAA	60.167	21	169	877	1045	CAATGAAGGGCCATGAGAAT	59.894	20	TGGTATGCTCTCCACACACA	58.647	20	169	877	1045	AGACTGTCAATGAAGGGCCA	60.656	20	TGGTATGCTCTCCACACACAA	60.167	21	176	870	1045
TR33217_c0_g1	GATAATCACCCGTGTCACCA	59.219	20	TTCTTCCTGTGGTGGGAAAG	60.081	20	276	541	816	GATAATCACCCGTGTCACCA	59.219	20	CTTCTTCCTGTGGTGGGAAA	60.081	20	277	541	817	GATAATCACCCGTGTCACCA	59.219	20	GCCGGATCACAATCCATTAC	60.163	20	257	541	797
TR52018_c0_g1	CCGTCTGTCAATATCTGTCACTTT	59.586	24	CGGCAAAGAACCCAGTGTAT	59.993	20	258	75	332	GACCGTCTGTCAATATCTGTCACT	59.574	24	CGGCAAAGAACCCAGTGTAT	59.993	20	260	73	332	CCGTCTGTCAATATCTGTCACTTT	59.586	24	GTCCTCCTACCTCGCTCCTT	59.84	20	215	75	289
TR19308_c0_g3	CCGTTACTCGGGTTGGTCTA	59.986	20	GCATGTTTGGCGATCAGTAA	59.694	20	269	3128	3396	CCGTTACTCGGGTTGGTCTA	59.986	20	GAATTATGCATGTTTGGCGA	59.525	20	276	3128	3403	CCGTTACTCGGGTTGGTCTA	59.986	20	TATGCATGTTTGGCGATCAG	60.632	20	272	3128	3399
TR34405_c0_g1	TGATCTAACAAATTTCGGCTTG	59.253	22	GGGGCGACTTTCAAACATTA	59.938	20	251	789	1039	TGATCTAACAAATTTCGGCTTG	59.253	22	CATGATTCATAGGGGCGACT	59.917	20	262	789	1050	TGATCTAACAAATTTCGGCTTG	59.253	22	TGCTGCATCATGTGAAAACA	59.833	20	104	789	892
TR32862_c2_g1	ATTTGATGCTTTGGCTGACC	60.081	20	GTTGCAGAGATTCGCACAGA	60.144	20	245	793	1037	TGGCTGACCTAGGACCTTTG	60.246	20	GTTGCAGAGATTCGCACAGA	60.144	20	234	804	1037	ATTTGATGCTTTGGCTGACC	60.081	20	CACCCCACTAAAAGCACCAC	60.41	20	212	793	1004
TR8313_c0_g3	AACGAAAACAGCTGAGCAGG	60.571	20	GCGTCGGTATCACCTTCTGT	60.142	20	123	242	364	AACGAAAACAGCTGAGCAGG	60.571	20	TGTGTTGTAAGGCGTCGGTA	60.172	20	134	242	375	AACGAAAACAGCTGAGCAGG	60.571	20	TAAGGCGTCGGTATCACCTT	59.592	20	127	242	368
TR32156_c0_g1	CGACGACAACACAAACTACG	57.828	20	TTTTTGTGGTTGGAGAGGTTG	59.994	21	171	19	189	ACGACGACAACACAAACTACG	58.766	21	TTTTTGTGGTTGGAGAGGTTG	59.994	21	172	18	189	CGACGACAACACAAACTACG	57.828	20	TTTTGTGGTTGGAGAGGTTG	58.594	20	170	19	188
TR32156_c0_g1	TACGACAACCTCTCCAACCA	59.135	20	TGGAGTTGTGTTCGTAGTTCG	58.837	21	214	164	377	CAACCTCTCCAACCACAAAAA	59.994	21	TCGTAGTTGGAGTTGTGTTCGT	59.702	22	216	169	384	CAACCTCTCCAACCACAAAA	58.594	20	TCGTAGTTGGAGTTGTGTTCGT	59.702	22	216	169	384
TR20700_c0_g1	GGATTGTCCGGAGTTTTGAA	59.91	20	CAATCTGCCATTTCCCATCT	59.894	20	274	2346	2619	GTTTTGAAACTGGCGGAGAA	60.227	20	CAATCTGCCATTTCCCATCT	59.894	20	262	2358	2619	AGTCACCCCCTCAGGAAGAT	59.929	20	TTCAATCTGCCATTTCCCAT	60.274	20	176	2446	2621
TR6575_c1_g1	TCTCAATGCAGTTCAAAAACAAA	59.787	23	TCATGTTGTTCAAATTCGGG	59.371	20	240	623	862	TTCTCAATGCAGTTCAAAAACAA	59.787	23	TCATGTTGTTCAAATTCGGG	59.371	20	241	622	862	TCTCAATGCAGTTCAAAAACAA	58.464	22	TCATGTTGTTCAAATTCGGG	59.371	20	240	623	862
TR26900_c0_g1	TGGGTGAATGTGGGAGGTAT	60.05	20	AAAGCGAACAGAGCAGATCC	59.579	20	278	2315	2592	TGGGTGAATGTGGGAGGTAT	60.05	20	GCTGCCTGATCTGGATCTTT	59.39	20	238	2315	2552	TGGGTGAATGTGGGAGGTAT	60.05	20	AAGCGAACAGAGCAGATCCT	59.191	20	277	2315	2591
TR38771_c0_g1	GACGCAGTTCCAACAACAGA	59.88	20	ATATGGTTGCGGACTTGAGG	59.955	20	224	1256	1479	CGTTTTTGCGTATTTCAGCA	59.88	20	ATATGGTTGCGGACTTGAGG	59.955	20	187	1293	1479	ACCTTTGCGAAGCAGTTGAC	60.44	20	ATATGGTTGCGGACTTGAGG	59.955	20	241	1239	1479
TR53991_c1_g1	CTCCATTGTCTTGCCAATCA	59.648	20	CTTCTGGCGGTAGGTGTAGC	59.898	20	258	1147	1404	CTGTCTGCAGCAAAGGACTG	59.77	20	TGGCTGTTGACAGCAATGAT	60.272	20	276	1032	1307	CAGTGTTGCACCTCCATTGT	59.597	20	CTTCTGGCGGTAGGTGTAGC	59.898	20	269	1136	1404
TR50727_c0_g1	GGATGTGCACACGAATGTATG	59.862	21	TTTCACACTGATCGGACCAA	60.088	20	137	603	739	AACCATGTTAAGCATTCCCC	58.765	20	TTTCACACTGATCGGACCAA	60.088	20	240	500	739	AACCATGTTAAGCATTCCCCT	59.717	21	TTTCACACTGATCGGACCAA	60.088	20	240	500	739
TR2972_c0_g1	CCTGGCAGCACTTTTAGCAT	60.407	20	TGATGCCATTTAAAGAGTTGATAGA	59.224	25	217	567	783	CCATTAATTCCTGGCAGCAC	60.469	20	TGATGCCATTTAAAGAGTTGATAGA	59.224	25	226	558	783	CCTGGCAGCACTTTTAGCAT	60.407	20	TTTATGATGCCATTTAAAGAGTTGA	59.13	25	221	567	787
TR15894_c0_g1	AGGTAACAGAGGCTCGGAGA	59.04	20	TGACATCAATTGTCCGAAGG	59.496	20	242	981	1222	GGCTCGGAGATTAAGACTCG	59.031	20	TGACATCAATTGTCCGAAGG	59.496	20	232	991	1222	AGGCTCGGAGATTAAGACTCG	59.99	21	TGACATCAATTGTCCGAAGG	59.496	20	233	990	1222
TR46042_c0_g2	GCCGGATTTAAGAGAAACGG	60.92	20	ATACAAAGGGATCGGCAAAA	59.411	20	138	1751	1888	GCCGGATTTAAGAGAAACGG	60.92	20	TACAAAGGGATCGGCAAAAT	59.411	20	137	1751	1887	ACAATGGTCCGATTTTGTCC	59.653	20	GCTTATACAAAGGGATCGGC	58.673	20	110	1783	1892
TR12873_c1_g1	GGCACTAAAGATGAGCTGGC	59.985	20	TCTTTCTCTTCCTCCTCCCC	59.749	20	272	767	1038	GGCACTAAAGATGAGCTGGC	59.985	20	TTCTCTTCCTCCTCCCCTTC	59.749	20	269	767	1035	AACAAGATTGCTGGAATGGC	60.081	20	TCTTTCTCTTCCTCCTCCCC	59.749	20	252	787	1038
TR12426_c0_g1	TGCATCAGGAATAAATGTGGG	60.706	21	ACTGGAAATGACTCATCGGC	60.081	20	144	131	274	TGCATCAGGAATAAATGTGGG	60.706	21	TGGTCCTGTTGAGGTGATGA	60.088	20	264	131	394	TGCATCAGGAATAAATGTGGG	60.706	21	GTTGAGGTGATGACTCGGCT	60.269	20	257	131	387
TR26905_c0_g2	AGGGCTGTCAAAAGAACGAA	59.853	20	AAAAACGAAATCGATGGCAC	59.945	20	191	2275	2465	AAGGGCTGTCAAAAGAACGA	59.853	20	AAAAACGAAATCGATGGCAC	59.945	20	192	2274	2465	ATCCCGCTGGTTAGAAGTGA	59.694	20	AAAAACGAAATCGATGGCAC	59.945	20	168	2298	2465
TR7541_c3_g3	GGGTCCAGATACCAGCACAT	59.81	20	TGGCAGCTGTTTATTCCAAA	59.301	20	235	211	445	AGGGTCCAGATACCAGCACA	60.533	20	TGGCAGCTGTTTATTCCAAA	59.301	20	236	210	445	GGGTCCAGATACCAGCACAT	59.81	20	TGGCAGCTGTTTATTCCAAAG	60.25	21	235	211	445
TR17001_c0_g1	AACTTGAAGAATTCACCAGGGA	59.976	22	GCCAGAGTTATCCCCCTTTC	59.903	20	249	293	541	AACTTGAAGAATTCACCAGGGA	59.976	22	TTATCCCCCTTTCCACCTTC	60.124	20	242	293	534	AACTTGAAGAATTCACCAGGGA	59.976	22	AAATGGCCAGAGTTATCCCC	60.152	20	254	293	546
TR17001_c0_g1	ACAGATCTGCACATTGGCTG	59.862	20	TGTACCTGTTTTCATTCATAATAACCT	58.517	27	215	1142	1356	CAACAGATCTGCACATTGGC	60.272	20	TGTACCTGTTTTCATTCATAATAACCT	58.517	27	217	1140	1356	ACATTGGCTGGGCTATGTGT	60.406	20	TGTACCTGTTTTCATTCATAATAACCT	58.517	27	205	1152	1356
TR44803_c0_g1	TCTTTAACAAAACAAATTTGAGCA	58.119	24	AGAAACTGGGACTGGGGACT	59.968	20	232	68	299	TCTTTAACAAAACAAATTTGAGCA	58.119	24	CAGAGTTTGGGTGACTGCAA	59.873	20	206	68	273	TCTTTAACAAAACAAATTTGAGCA	58.119	24	GACTAACGGGCAGAGTTTGG	59.734	20	216	68	283
TR17238_c1_g1	TTCCGTTAGTTTCAAGTCGCT	59.031	21	TCTGAGGGCCATATGGAAGA	60.56	20	113	970	1082	TTCCGTTAGTTTCAAGTCGC	58.027	20	TCTGAGGGCCATATGGAAGA	60.56	20	113	970	1082	TTCCGTTAGTTTCAAGTCGCT	59.031	21	TGAGGGCCATATGGAAGATT	59.344	20	111	970	1080
TR51786_c3_g11	TCCAAGCTGCTTTTTGTGTG	60.027	20	CAGAAAACCGTACCGGACAT	59.853	20	242	1098	1339	AGCTGCTTTTTGTGTGGCTT	60.059	20	CAGAAAACCGTACCGGACAT	59.853	20	238	1102	1339	AAGCTGCTTTTTGTGTGGCT	60.059	20	CAGAAAACCGTACCGGACAT	59.853	20	239	1101	1339
TR17315_c2_g2	TGTGTTTTCTAGAATGCGGC	58.92	20	CATTGGTTAAGTGCATTCGC	59.186	20	119	23	141	TGTGTTTTCTAGAATGCGGCT	59.897	21	CATTGGTTAAGTGCATTCGC	59.186	20	119	23	141	TTGTGTTTTCTAGAATGCGGC	60.258	21	CATTGGTTAAGTGCATTCGC	59.186	20	120	22	141
TR41884_c0_g1	ATCGTGGTTGCTCCCATATC	59.78	20	TGTTTACATCGGTTTGTGCG	60.557	20	210	59	268	TCGTGGTTGCTCCCATATCT	60.483	20	TGTTTACATCGGTTTGTGCG	60.557	20	209	60	268	TGCGTGAGTTTCCATGATTG	60.665	20	TGTTTACATCGGTTTGTGCG	60.557	20	231	38	268
TR29792_c5_g3	CATCCGAAATACACGCCTCT	60.096	20	ACTCTCCGTTCCGTTAGGGT	59.994	20	279	766	1044	CCGAAATACACGCCTCTTGT	60.132	20	ACTCTCCGTTCCGTTAGGGT	59.994	20	276	769	1044	CACAGGACACGACTGGTTTG	60.194	20	ACTCTCCGTTCCGTTAGGGT	59.994	20	182	863	1044
TR50480_c0_g1	AAAGATGCGAACAAAGGTGC	60.257	20	ATTTGAGTCCGAAATGGCAA	60.448	20	276	695	970	AAAGATGCGAACAAAGGTGC	60.257	20	CAATTTGAGTCCGAAATGGC	60.448	20	278	695	972	AAAGATGCGAACAAAGGTGC	60.257	20	AATTTGAGTCCGAAATGGCA	60.448	20	277	695	971
TR10711_c0_g1	GCTGTGACGTTAGGGTCTCC	59.727	20	TAGCACAGATGTGCCTGCTT	59.621	20	272	2661	2932	GCTGTGACGTTAGGGTCTCC	59.727	20	AGCACAGATGTGCCTGCTTA	59.621	20	271	2661	2931	CTGTGACGTTAGGGTCTCCC	59.574	20	TAGCACAGATGTGCCTGCTT	59.621	20	271	2662	2932
TR32816_c0_g2	ATCGATTTGCCAGCTGATCT	59.803	20	TGCACATCAAAAGAACAGAGC	59.065	21	202	75	276	ATCGATTTGCCAGCTGATCT	59.803	20	ATGCACATCAAAAGAACAGAGC	59.387	22	203	75	277	CATCGATTTGCCAGCTGAT	59.772	19	GCACATCAAAAGAACAGAGCA	59.065	21	202	74	275
TR23238_c1_g1	GATTTCCGAGCGACAGAAAG	59.955	20	GCTGGATCTAACAGACCCCA	60.073	20	257	1042	1298	GATTTCCGAGCGACAGAAAG	59.955	20	TGCTGGATCTAACAGACCCC	60.073	20	258	1042	1299	GATTTCCGAGCGACAGAAAG	59.955	20	GACCCCAATGCTGTGTTTTT	59.836	20	244	1042	1285
TR51274_c0_g1	AAGGTCACAGGGTTCATGGT	59.279	20	TTCCTGGCTTTGAGCAAAAT	59.823	20	216	82	297	AGGTCACAGGGTTCATGGTG	60.84	20	TTCCTGGCTTTGAGCAAAAT	59.823	20	215	83	297	GGTCAAGGTCACAGGGTTCA	60.966	20	TTCCTGGCTTTGAGCAAAAT	59.823	20	220	78	297
TR6627_c1_g1	TCGGATCACATTTTCCACAA	59.9	20	TTTTTACAAGAAACTTAATGATTCGAT	58.046	27	206	1022	1227	TCCACAAACAGCTCATTCCA	60.24	20	TTTTTACAAGAAACTTAATGATTCGAT	58.046	27	193	1035	1227	CCACAAACAGCTCATTCCAA	59.691	20	TTTTTACAAGAAACTTAATGATTCGAT	58.046	27	192	1036	1227
TR6578_c1_g1	TCATAGCTCAGAAACCGTTATCA	58.912	23	AAACGCTGTCTTGAAGATTGTT	58.061	22	269	255	523	GTCATAGCTCAGAAACCGTTATCA	59.693	24	AAACGCTGTCTTGAAGATTGTT	58.061	22	270	254	523	TCATAGCTCAGAAACCGTTATCA	58.912	23	TTAAACGCTGTCTTGAAGATTGTT	59.391	24	271	255	525
TR37607_c0_g1	TGAACCAAAAACCATCGTGA	59.941	20	CCAGTCACCGACAAAACCTT	60.005	20	200	1232	1431	TGAACCAAAAACCATCGTGA	59.941	20	CTCCAGTCACCGACAAAACC	60.545	20	202	1232	1433	TGAACCAAAAACCATCGTGA	59.941	20	TCCAGTCACCGACAAAACCT	60.545	20	201	1232	1432
TR37607_c0_g1	CATCCCTGATGAGAAGGCTC	59.761	20	ATCTCGAGCATCAGATTGGC	60.335	20	249	2767	3015	CATCCCTGATGAGAAGGCTC	59.761	20	TTGAAATTGCTTTCCGGTTT	59.564	20	184	2767	2950	CATCCCTGATGAGAAGGCTC	59.761	20	TTTGAAATTGCTTTCCGGTT	59.564	20	185	2767	2951
TR23884_c2_g2	GGTGAGGAGGCAACAGAAAG	59.844	20	TTCGCTTTTGCTTTTCAATG	59.074	20	262	862	1123	GCAACAGAAAGTATTCGCCC	59.713	20	TTCGCTTTTGCTTTTCAATG	59.074	20	253	871	1123	GGCAACAGAAAGTATTCGCC	59.713	20	TTCGCTTTTGCTTTTCAATG	59.074	20	254	870	1123
TR55657_c0_g2	CCTTGTGAAATCCGTCTGGT	59.966	20	AACAGCAAGAACGGCAAACT	59.92	20	256	643	898	CCTTGTGAAATCCGTCTGGT	59.966	20	ACAGCAAGAACGGCAAACTT	59.92	20	255	643	897	CCTTGTGAAATCCGTCTGGT	59.966	20	TGGCGTAATGAAACGAAACA	60.111	20	272	643	914
TR23264_c1_g1	CAAGCCCTTCAACCACCTAA	60.103	20	CGATATCAGGTTGAGCAGCA	59.972	20	271	1735	2005	CAAGCCCTTCAACCACCTAA	60.103	20	TGCGATATCAGGTTGAGCAG	59.972	20	273	1735	2007	GGGCTCTTCAGATGCTGGTA	60.362	20	GATGTTCCAACACACGAACG	60.008	20	204	1869	2072
TR19923_c0_g2	TCACGTTACCCGTTTTCTGA	59.17	20	AAAAGATACGCACGGTTTTCA	59.639	21	261	995	1255	TCACGTTACCCGTTTTCTGA	59.17	20	AAAGATACGCACGGTTTTCAA	59.639	21	260	995	1254	TCACGTTACCCGTTTTCTGA	59.17	20	AAAGATACGCACGGTTTTCA	58.294	20	260	995	1254
TR46852_c0_g1	AGTGGTGGAAACGCTACTGC	60.321	20	TTCACTTTGTCTCCGCACAG	60.025	20	275	465	739	TGGAAACGCTACTGCAAAAA	59.486	20	TTCACTTTGTCTCCGCACAG	60.025	20	270	470	739	CAAGTGGTGGAAAATTTGGG	60.198	20	TTGAAGGAAGCTGTCTTGGG	60.366	20	270	445	714
TR51761_c0_g1	AAAGGGGCTTACAGAGAGGC	59.848	20	TAAGCTGCTGGGTCCTCAAC	60.397	20	241	2085	2325	AAAGGGGCTTACAGAGAGGC	59.848	20	CTAAGCTGCTGGGTCCTCAA	60.529	20	242	2085	2326	AAAGGGGCTTACAGAGAGGC	59.848	20	ATCGTCTAAGCTGCTGGGTC	59.459	20	247	2085	2331
TR23857_c5_g1	CAAACGCAGGTATGAGAGCA	60.011	20	GGACCTGGAAGACGATGATG	60.475	20	197	3957	4153	CGAGGATCAAACGCAGGTAT	60.096	20	GGACCTGGAAGACGATGATG	60.475	20	204	3950	4153	GGTCTTCTTCCTCTCTCGGC	60.477	20	TACCCTGACGACCACACAGA	60.154	20	274	4012	4285
TR49759_c0_g1	ACGGTTATTGCGACTGTTCC	60	20	TGTCGAAAGTGTGGTTGAGG	59.72	20	188	773	960	ACGGTTATTGCGACTGTTCC	60	20	TGAAGGTGTCGAAAGTGTGG	59.72	20	194	773	966	ACGGTTATTGCGACTGTTCC	60	20	GGTGTCGAAAGTGTGGTTGA	59.571	20	190	773	962
TR46757_c0_g1	TGTGAAGAGAGCCATGTTCG	59.984	20	AAACCGCTGATACATCTGGC	60.103	20	212	427	638	TGTGAAGAGAGCCATGTTCG	59.984	20	CCTCCTGAAAACCGCTGATA	60.206	20	220	427	646	CCTGTGTGTGAAGAGAGCCA	60.022	20	CCTCCTGAAAACCGCTGATA	60.206	20	226	421	646
TR6096_c0_g1	CACTGGATTTGGAGGTGTCA	59.52	20	TTGGAATCAATTTTCTCGCC	60.016	20	192	834	1025	CTCGTATGGTTACGGCAAGG	60.514	20	TTGGAATCAATTTTCTCGCC	60.016	20	225	801	1025	ATGGTTACGGCAAGGAAGAA	59.569	20	TCAATTTTCTCGCCAGTTCC	60.192	20	214	806	1019
TR15451_c0_g1	TTCCCGGATTGTCAGCTATC	60.036	20	GACGGCTTCGTACTGGTGAT	60.142	20	256	256	511	TTCCCGGATTGTCAGCTATC	60.036	20	AAGACGGCTTCGTACTGGTG	60.312	20	258	256	513	TCAATGTCAGTGTTGTGGCA	59.705	20	GACGGCTTCGTACTGGTGAT	60.142	20	280	232	511
TR20823_c0_g1	TCGAAGAAACGAAGCGAAAC	60.502	20	AGATCCGCTTTCCTGAGACA	59.95	20	279	2219	2497	AACGAAGCGAAACATTAGGC	59.365	20	AGATCCGCTTTCCTGAGACA	59.95	20	272	2226	2497	TCGAAGAAACGAAGCGAAAC	60.502	20	ATCCGCTTTCCTGAGACAAA	59.813	20	277	2219	2495
TR10331_c0_g1	CCGCATTCTGAGGTCAATCT	60.218	20	CACAATGACGGACAAACAGG	60.001	20	238	785	1022	CCGCATTCTGAGGTCAATCT	60.218	20	GCACACAATGACGGACAAAC	60.016	20	241	785	1025	CAAATTTCGGTGCTTGTGAA	59.706	20	CACAATGACGGACAAACAGG	60.001	20	172	851	1022
TR25903_c0_g1	ATTGGTGGGCATTACATGGT	59.939	20	TGTTCATCAACGCCAACATT	59.972	20	194	1011	1204	CTTTCTGTGTCATGCCTCCA	59.831	20	TGTTCATCAACGCCAACATT	59.972	20	275	930	1204	ATCAGGGACCACAATGGAAA	60.173	20	TGTTCATCAACGCCAACATT	59.972	20	253	952	1204
TR32376_c0_g1	GGCTAGTGGAGCAGTGTATGC	59.919	21	TTACCGGTCAGGTTTTTGCT	59.609	20	259	139	397	GGCTAGTGGAGCAGTGTATGC	59.919	21	TACCGGTCAGGTTTTTGCTT	59.609	20	258	139	396	GGCTAGTGGAGCAGTGTATGC	59.919	21	GTTACCGGTCAGGTTTTTGC	59.476	20	260	139	398
TR57341_c8_g1	AAAGTTGGAGCACAGGCAAT	59.74	20	TGGCAAATGGTAAAGATCCA	58.965	20	193	318	510	AAAGTTGGAGCACAGGCAAT	59.74	20	TGGCAAATGGTAAAGATCCAG	59.946	21	193	318	510	AGAAAAGTTGGAGCACAGGC	59.478	20	TGGCAAATGGTAAAGATCCA	58.965	20	196	315	510
TR26808_c0_g1	AGCCTCACCATACAGCAGGA	60.823	20	ATGATGTTGCCAGAATTCCC	59.756	20	188	177	364	CACAGCCTCACCATACAGCA	60.895	20	ATGATGTTGCCAGAATTCCC	59.756	20	191	174	364	AGCCTCACCATACAGCAGGA	60.823	20	TCCAAGACGGTAAGCCTCTG	60.388	20	100	177	276
TR3249_c1_g1	ACATTGAAAGACCGGTTCCA	60.353	20	AACTGTGGACCATTTTGGAGA	59.439	21	233	463	695	CATTGAAAGACCGGTTCCAG	60.486	20	AACTGTGGACCATTTTGGAGA	59.439	21	232	464	695	ACATTGAAAGACCGGTTCCA	60.353	20	ACTGTGGACCATTTTGGAGA	57.971	20	232	463	694
TR28752_c0_g1	AGGACATTTCAGCCATTTTG	57.67	20	AAGGGTCTATTTGAGATGTCGC	59.62	22	271	726	996	AGGACATTTCAGCCATTTTGT	58.567	21	AAGGGTCTATTTGAGATGTCGC	59.62	22	271	726	996	GGACATTTCAGCCATTTTGT	57.515	20	AAGGGTCTATTTGAGATGTCGC	59.62	22	270	727	996
TR16959_c1_g2	AAGTCCGCAGAGAGCTTGAG	59.891	20	ACTGAACCGCCTTTCCTTTT	60.11	20	233	719	951	AAGTCCGCAGAGAGCTTGAG	59.891	20	AAACTGAACCGCCTTTCCTT	60.11	20	235	719	953	TTTGCAGTCTTGTTTCTGCG	60.172	20	CTCTGGGTCCGTGTTCACTT	60.151	20	232	877	1108
TR21323_c0_g1	GAAGCAGGGTTGGAACTGAA	60.232	20	CCTGTAAACAAGACAATTTCGATG	59.933	24	246	3753	3998	GCAGGGTTGGAACTGAAGTC	59.703	20	CCTGTAAACAAGACAATTTCGATG	59.933	24	243	3756	3998	AAGCAGGGTTGGAACTGAAG	59.328	20	CCTGTAAACAAGACAATTTCGATG	59.933	24	245	3754	3998
TR7080_c3_g2	ATTGGACACCTTTGCCTGTC	59.973	20	GTACCACACAACCTTTGCCC	60.277	20	259	866	1124	ATTGGACACCTTTGCCTGTC	59.973	20	GGTACCACACAACCTTTGCC	60.277	20	260	866	1125	CAAATTGGACACCTTTGCCT	59.971	20	GTACCACACAACCTTTGCCC	60.277	20	262	863	1124
TR29800_c0_g1	TTTTTCAAGCTTTGAGGCAGA	60.117	21	ATTTTGAAATTTGTTGGCGA	58.135	20	177	904	1080	TTTTCAAGCTTTGAGGCAGA	58.771	20	ATTTTGAAATTTGTTGGCGA	58.135	20	176	905	1080	TTTTTCAAGCTTTGAGGCAG	58.293	20	ATTTTGAAATTTGTTGGCGA	58.135	20	177	904	1080
TR29877_c1_g2	CAGCCGAATTTCAGTTGCAT	61.168	20	TTGGCATATTGGTCGTTTTT	58.018	20	255	1811	2065	AAGGACAGCCGAATTTCAGT	58.792	20	TTGGCATATTGGTCGTTTTT	58.018	20	260	1806	2065	CACAATTAAGGACAGCCGAA	58.771	20	TTGGCATATTGGTCGTTTTT	58.018	20	267	1799	2065
TR17601_c0_g1	ATTCGGGACAGAAGGAGACA	59.655	20	TGCTCTGTCCAGAGTTGACG	60.178	20	242	592	833	TCGGGACAGAAGGAGACAAG	60.377	20	TGCTCTGTCCAGAGTTGACG	60.178	20	240	594	833	ATTCGGGACAGAAGGAGACA	59.655	20	TGTTCCTGGAAGCTTTCGAC	60.375	20	177	592	768
TR17601_c0_g1	CAGGATGAAAGCAAACGTGA	59.84	20	TTCGTATCCTGGAACCGATAA	59.42	21	271	1707	1977	GACACTGCATCGACCAAGAA	59.837	20	TTCGTATCCTGGAACCGATAA	59.42	21	230	1748	1977	ATGACACTGCATCGACCAAG	59.707	20	TTCGTATCCTGGAACCGATAA	59.42	21	232	1746	1977
TR48270_c1_g1	TGAGTTTTCTTCGGACCTGG	60.224	20	ACAGTTTGGCTAGAAGGGGG	60.488	20	126	104	229	TGACACACAAGGGAGCAATC	59.682	20	ACAGTTTGGCTAGAAGGGGG	60.488	20	162	68	229	TGAGTTTTCTTCGGACCTGG	60.224	20	AGAAATTTCCTGACCCACCA	59.381	20	246	104	349
TR56036_c0_g1	TTGGTGTCGGCAAAATTGTA	59.969	20	CAGATGGACAGGGCAAAAAC	60.495	20	209	3789	3997	TTGGTGTCGGCAAAATTGTA	59.969	20	ACAGATGGACAGGGCAAAAA	60.495	20	210	3789	3998	TTGGTGTCGGCAAAATTGTA	59.969	20	AGATGGACAGGGCAAAAACA	60.495	20	208	3789	3996
TR26171_c7_g1	AATGTGCTAGCCGATTTTGG	60.096	20	ATTGGTGCAGATCAAGTCCC	59.934	20	279	42	320	TGCTAGCCGATTTTGGATCT	59.807	20	ATTGGTGCAGATCAAGTCCC	59.934	20	275	46	320	TCTCTCACCCCATAAAGGCA	60.594	20	AGAGGAGGGCCTACATTGGT	59.957	20	262	73	334
TR20656_c0_g1	GCAAATGGTCACTTTTCTTGC	59.744	21	CGAAAAGCGTGCAGTCAGTA	60.195	20	229	581	809	GGCAAATGGTCACTTTTCTTG	59.601	21	CGAAAAGCGTGCAGTCAGTA	60.195	20	230	580	809	GCAAATGGTCACTTTTCTTGC	59.744	21	CGGACAATCACATGGAAACA	60.367	20	195	581	775
TR37324_c0_g1	TCTTTGGTTTTAAACAAGTGCAT	57.937	23	CAAAACGATTCTCCACGTCA	59.691	20	272	747	1018	CAGCTGAATTGTGCAAATACATAAA	60.407	25	CAAAACGATTCTCCACGTCA	59.691	20	226	793	1018	TCTTTGGTTTTAAACAAGTGCAT	57.937	23	GCTCAAAACGATTCTCCACG	60.776	20	275	747	1021
TR32202_c0_g1	TAGAACCAGCAAAAGGACCC	59.17	20	TAATCATCGGCATTTCCACA	59.891	20	147	1193	1339	ACCAGCAAAAGGACCCCTAA	60.846	20	TAATCATCGGCATTTCCACA	59.891	20	143	1197	1339	AACCAGCAAAAGGACCCCTA	60.846	20	TAATCATCGGCATTTCCACA	59.891	20	144	1196	1339
TR29671_c0_g1	TTCATAGGTGTAGAGCCCCA	58.173	20	CAAAGAATCCAAATGGCACA	59.518	20	265	583	847	AATTCATAGGTGTAGAGCCCCA	59.856	22	CAAAGAATCCAAATGGCACA	59.518	20	267	581	847	TTCATAGGTGTAGAGCCCCATT	59.856	22	CAAAGAATCCAAATGGCACA	59.518	20	265	583	847
TR29335_c0_g1	TTTGGTCTATCTTTTCGCGG	60.202	20	TGTCATTTTCATGCCTACGG	59.542	20	242	2696	2937	TTTGGTCTATCTTTTCGCGG	60.202	20	TCATGCCTACGGCGTTTATT	60.476	20	234	2696	2929	TTTGGTCTATCTTTTCGCGG	60.202	20	TTCATGCCTACGGCGTTTAT	60.476	20	235	2696	2930
TR28706_c0_g1	TCCCACAACATAAAGGCACA	59.964	20	TTTTTCCATGTTTGCCATGT	58.869	20	216	37	252	CACTGGTTTTACTCCTCGCC	59.734	20	TTTTTCCATGTTTGCCATGT	58.869	20	131	122	252	ACTGGTTTTACTCCTCGCCA	59.734	20	TTTTTCCATGTTTGCCATGT	58.869	20	130	123	252
TR28706_c0_g1	AGCCCCCACTCCACTTTACT	59.994	20	CACTCAACAGTGGCAGCAGT	60.096	20	117	769	885	AGCCCCCACTCCACTTTACT	59.994	20	CACAGAGGAAAGCAAGAGGC	60.134	20	215	769	983	TCTAAACACAGCCCCCACTC	60.111	20	GCACAGAGGAAAGCAAGAGG	60.134	20	225	760	984
TR39273_c3_g1	ATAAAAATTCGCGACGGATG	59.928	20	TACGAGGGTTGTTCGGAAAG	60.103	20	270	834	1103	ATAAAAATTCGCGACGGATG	59.928	20	ATGCCATACGAGGGTTGTTC	59.82	20	276	834	1109	ATAAAAATTCGCGACGGATG	59.928	20	CATTGCTGCGCAATACATTT	59.731	20	217	834	1050
TR26872_c0_g1	GCGAAACAATATCAACGCCT	60.103	20	TCCTGCTTGATCATCTGTGC	59.95	20	213	2528	2740	GCGAAACAATATCAACGCCT	60.103	20	GTTTGAAAGAAATCCGTCCG	59.546	20	191	2528	2718	AGGCGAAACAATATCAACGC	60.103	20	GTTTGAAAGAAATCCGTCCG	59.546	20	193	2526	2718
TR17326_c2_g5	AATATTTCAGCCGCCGTATG	59.95	20	TGAGGGATCAAAATTACGCC	59.901	20	240	159	398	AATATTTCAGCCGCCGTATG	59.95	20	ATGACCGTTGAGGGATCAAA	60.317	20	248	159	406	ATATTTCAGCCGCCGTATGT	59.461	20	TGAGGGATCAAAATTACGCC	59.901	20	239	160	398
TR40269_c2_g2	GGGAAAAGCGGTTTTGAAAT	60.292	20	TGCATTTGGTAAAAACTATAACACA	57.861	25	170	1546	1715	CGGTTTTGAAATGTTTTCCG	60.327	20	TGCATTTGGTAAAAACTATAACACA	57.861	25	162	1554	1715	GGAAAAGCGGTTTTGAAATG	59.564	20	TGCATTTGGTAAAAACTATAACACA	57.861	25	169	1547	1715
TR28477_c0_g1	CGCCCTCTTTTATCTGGTCA	60.206	20	CGTTATCTGGGCTTATCGGA	60.053	20	235	1106	1340	TTCTGGGAGGCGTAGATGTT	59.694	20	CGTTATCTGGGCTTATCGGA	60.053	20	164	1177	1340	AGCGACTCGCCCTCTTTTAT	60.36	20	CGTTATCTGGGCTTATCGGA	60.053	20	242	1099	1340
TR29667_c0_g2	ACACAAAGCTGCGATGACTG	60.056	20	AGTTGAGAGTTTGCTGCGGT	60.058	20	146	664	809	ACACAAAGCTGCGATGACTG	60.056	20	TAGTCCCAGGACAAAATGGC	59.933	20	177	664	840	AGACTGATGCTGCTGGGATT	59.834	20	CTCTGCTTCAAACCAAAGCC	59.993	20	247	704	950
TR29663_c0_g1	TACTTTTTGGCTGTTTGGGG	59.968	20	AACAACATATAAGCAAGCGCAA	59.816	22	239	614	852	TACTTTTTGGCTGTTTGGGG	59.968	20	CAACATATAAGCAAGCGCAATC	59.78	22	237	614	850	TACTTTTTGGCTGTTTGGGG	59.968	20	CAACATATAAGCAAGCGCAA	57.656	20	237	614	850
TR7525_c0_g1	ACTGCCGATGTCAATCATCA	60.08	20	AATGCTGAATCTCACGGGTC	60.081	20	227	959	1185	TGTGAACTGCCGATGTCAAT	60.12	20	AATGCTGAATCTCACGGGTC	60.081	20	232	954	1185	ATGTGAACTGCCGATGTCAA	60.12	20	AATGCTGAATCTCACGGGTC	60.081	20	233	953	1185
TR9406_c3_g5	GTCAAGTGGAACCCCTGATG	60.363	20	GTCCAAGCCCAAATGATGAC	60.326	20	159	3202	3360	GTCAAGTGGAACCCCTGATG	60.363	20	CGGTTTTACCATTTGCAAGG	60.348	20	207	3202	3408	GTCAAGTGGAACCCCTGATG	60.363	20	TCCAAGCCCAAATGATGACT	60.461	20	158	3202	3359
TR17311_c1_g1	ACAATTGCCATTCGACAGAA	59.127	20	AATGGATGTACAACTGCTGGC	60.015	21	279	2304	2582	ACAATTGCCATTCGACAGAA	59.127	20	TGTACAACTGCTGGCAGTCAC	59.962	21	273	2304	2576	ACAATTGCCATTCGACAGAA	59.127	20	CAACTGCTGGCAGTCACTGTA	60.104	21	269	2304	2572
TR44684_c0_g1	GCTTGCTGAACTCGATATTTCTG	60.397	23	ATCAGATGCTTGGGATTTGG	59.894	20	240	1152	1391	GCTTGCTGAACTCGATATTTCTG	60.397	23	ACTGGTTTCCGTGCTCAGTT	59.769	20	219	1152	1370	GCTTGCTGAACTCGATATTTCTG	60.397	23	CTGGTTTCCGTGCTCAGTTT	60.291	20	218	1152	1369
TR51707_c2_g1	TTTAAAAGGCAGGCAAATGG	60.068	20	CGCTTCACAGGGGTGATACT	60.134	20	222	334	555	TGGTCATTGCAAAGGCATAA	60.073	20	CGCTTCACAGGGGTGATACT	60.134	20	205	351	555	TAAAAGGCAGGCAAATGGTC	60.074	20	CGCTTCACAGGGGTGATACT	60.134	20	220	336	555
TR16205_c0_g2	GATAGTGGTATGGGCGAGGA	59.917	20	ATGCATCAGAATGTGTCCGA	60.08	20	226	1006	1231	GATAGTGGTATGGGCGAGGA	59.917	20	CCATACTGTGATGCTGTGCC	60.144	20	142	1006	1147	GAACTCTGCATTCTACCGCC	59.843	20	CATCACCCCAACACACCATA	60.088	20	228	935	1162
TR53711_c3_g1	TCAAAATCCTGGCAACAACA	60.088	20	GAGGTCTTGAGGGTGCAGTC	59.841	20	199	1951	2149	TGGCAACAACAGAGACAAGG	59.873	20	GAGGTCTTGAGGGTGCAGTC	59.841	20	190	1960	2149	CCTGGCAACAACAGAGACAA	59.873	20	GAGGTCTTGAGGGTGCAGTC	59.841	20	192	1958	2149
TR23873_c2_g1	CACTTTCCCTGTCCACATCC	60.363	20	TGTTGAAATCACCCCCATCT	60.173	20	243	568	810	CTGCCTAGCAGCAATGGAAT	60.374	20	TGTTGAAATCACCCCCATCT	60.173	20	143	668	810	GCCTAGCAGCAATGGAATCT	59.439	20	TGTTGAAATCACCCCCATCT	60.173	20	141	670	810
TR9029_c4_g1	TTGGACAAAATCAGACCACG	59.541	20	GAAGCAGTAGGGTGTGGGTG	60.567	20	276	378	653	TTGGACAAAATCAGACCACG	59.541	20	GGGTGGGGCAAATTAACATT	60.783	20	261	378	638	TTGGACAAAATCAGACCACG	59.541	20	AAGAAGCAGTAGGGTGTGGG	59.208	20	278	378	655
TR14739_c0_g1	AAGAGAAAAGGGCAGCTGGT	60.382	20	GGGGTCCTTTCAAAGCCTTA	60.423	20	214	1695	1908	TTCAAAGAGAAAAGGGCAGC	59.569	20	GGGGTCCTTTCAAAGCCTTA	60.423	20	218	1691	1908	GGCTGGTCTTCAATGCTCAC	60.812	20	GGGGTCCTTTCAAAGCCTTA	60.423	20	194	1715	1908
TR18803_c1_g1	CAGATGTGATGGGTGGTCTG	59.954	20	ATTTTGGCGTCAACTGGTTC	59.978	20	185	1216	1400	CAGATGTGATGGGTGGTCTG	59.954	20	CAAGTAGGAAAAGGGGCACA	60.103	20	234	1216	1449	CAGATGTGATGGGTGGTCTG	59.954	20	AGGAAAAGGGGCACAACTCT	60.11	20	229	1216	1444
TR51360_c1_g1	TTCAACTTCACACAGCCAGC	60.032	20	TGTCAACTGCGATCCTTCTG	59.984	20	192	1215	1406	TATCGGGTGCACAGATTGAA	60.073	20	TGTCAACTGCGATCCTTCTG	59.984	20	164	1243	1406	ACGGGACCATTACCAGACAA	60.232	20	TGTCAACTGCGATCCTTCTG	59.984	20	219	1188	1406
TR33389_c0_g1	TTCATGCATCTATGGCCTCA	60.182	20	TTGCATTGTTTCACACCAAAA	59.999	21	257	312	568	TTCATGCATCTATGGCCTCA	60.182	20	TGCATTGTTTCACACCAAAAA	59.999	21	256	312	567	TTCATGCATCTATGGCCTCA	60.182	20	TTTTGCATTGTTTCACACCAA	59.999	21	259	312	570
TR23931_c2_g5	TGGTGCATGAGCATACAATG	59.101	20	TCCCCCACCATTTCTCTGTA	60.309	20	275	548	822	TGGTGCATGAGCATACAATG	59.101	20	CTTTTCCCCCACCATTTCTC	60.663	20	279	548	826	TGGTGCATGAGCATACAATG	59.101	20	TTTTCCCCCACCATTTCTCT	60.663	20	278	548	825
TR32227_c0_g2	TGGACGGTATGTCCAAACAA	59.816	20	GAAAGCTGTGCCTTGGAAAG	59.993	20	253	1242	1494	TGATGGACGGTATGTCCAAA	59.774	20	GAAAGCTGTGCCTTGGAAAG	59.993	20	256	1239	1494	GAAGAATGGGCATGATGGAC	60.289	20	GAAAGCTGTGCCTTGGAAAG	59.993	20	268	1227	1494
TR10436_c0_g1	TCACATTGCTGGCTTTGAAC	59.847	20	TTTAGAGCATGCACGTCACC	59.871	20	164	1389	1552	GTTCACATTGCTGGCTTTGA	59.847	20	TTTAGAGCATGCACGTCACC	59.871	20	166	1387	1552	TGGCTGTCGGACAATGTAGA	60.263	20	TTTAGAGCATGCACGTCACC	59.871	20	222	1331	1552
TR23904_c0_g1	TTCTGCAAACAGGAAATCCC	60.051	20	TGGTCTATGCAGACAGCCAG	60.008	20	186	277	462	TTCTGCAAACAGGAAATCCC	60.051	20	CTAAACCAGCCAGCACAACA	59.904	20	244	277	520	AAATCCCAAGTTTCTGGGCT	59.94	20	CTAAACCAGCCAGCACAACA	59.904	20	231	290	520
TR28744_c0_g1	AGGCCCCTTGCTTTACAAAC	60.483	20	CAACTTCCTCACCTTCTTCCC	60.096	21	249	1067	1315	CGGTAGTTCCAAAACCATGA	58.475	20	CTGGATCTACACTGGTCGCA	59.855	20	223	1231	1453	AGGCCCCTTGCTTTACAAAC	60.483	20	CGGACGAGGTCGATACTCAA	61.196	20	280	1067	1346
TR23377_c0_g5	CACCAACAGCCAAGGAAACT	60.149	20	TTGAGCCAGTGACATTGCAG	61.023	20	226	85	310	CACCAACAGCCAAGGAAACT	60.149	20	TGAGCCAGTGACATTGCAG	59.531	19	225	85	309	CACCAACAGCCAAGGAAACT	60.149	20	AATGGTTGAGCCAGTGACATT	59.468	21	231	85	315
TR25807_c1_g2	CCCAAGCTATAGTCGGTCGT	59.218	20	AGGCGTCTTCGAAATACACG	60.27	20	261	1355	1615	ACCCAAGCTATAGTCGGTCG	59.218	20	AGGCGTCTTCGAAATACACG	60.27	20	262	1354	1615	CGGTCGTCTCGTTGTTATTG	59.195	20	AGGCGTCTTCGAAATACACG	60.27	20	248	1368	1615
TR29880_c1_g3	CGTGATCTGCCAAAAACAAA	59.706	20	CCATGGAGTAAAGGGTTGACA	59.838	21	255	771	1025	GACGTGATCTGCCAAAAACA	59.697	20	CCATGGAGTAAAGGGTTGACA	59.838	21	257	769	1025	CTGCCAAAAACAAAATTCCC	59.429	20	CCATGGAGTAAAGGGTTGACA	59.838	21	249	777	1025
TR25115_c0_g4	GCGAACAAGTCGATGTAGCA	60.019	20	TTTTTCTTTCTTGTTGCCGC	60.356	20	272	524	795	TGGTAGCGAACAAGTCGATG	59.864	20	TGAACAATGCTAATCGGCAC	59.694	20	231	519	749	TGGTAGCGAACAAGTCGATG	59.864	20	TTTTTCTTTCTTGTTGCCGC	60.356	20	277	519	795
TR9079_c3_g2	AACTGCATGGATGTGCTGTC	59.714	20	TTCTGTTCTTCAACTGATTCAACC	59.674	24	260	75	334	GCATGGATGTGCTGTCTGAT	59.669	20	TTCTGTTCTTCAACTGATTCAACC	59.674	24	256	79	334	AGGACCTACCCAGGTTGCTT	59.994	20	CAAATTTCCAACAGAATTTTCAA	58.212	23	222	21	242
TR36780_c0_g1	TCATTTCAGATGCAGTAGCGTT	59.911	22	GACGTTCGAACACGTGAAGA	59.88	20	279	197	475	TCATTTCAGATGCAGTAGCGTT	59.911	22	CACGTGAAGACCGCAATAAA	59.729	20	269	197	465	TCATTTCAGATGCAGTAGCG	57.602	20	GACGTTCGAACACGTGAAGA	59.88	20	279	197	475
TR25818_c3_g1	CCCTTGAGTCCAGAATGACC	59.505	20	CTACGAAGACGAGGACAGGG	59.861	20	233	860	1092	CCTTGAGTCCAGAATGACCC	59.505	20	CTACGAAGACGAGGACAGGG	59.861	20	232	861	1092	CCTTGAGTCCAGAATGACCC	59.505	20	TGTGAACATGAACTGATGCG	59.248	20	183	861	1043
TR29861_c0_g1	AAAATAGGGGTGTCAGTTCCAA	59.741	22	TGACATTTGAATTATTGGATGGA	59.18	23	235	89	323	CCATGAAAAATAGGGGTGTCA	59.671	21	CATTTGAATTATTGGATGGAATG	58.248	23	238	83	320	CCATGAAAAATAGGGGTGTCA	59.671	21	CATTTGAATTATTGGATGGAATGT	59.03	24	238	83	320
TR9063_c2_g2	GGTGTATTTTGAGGGAAAGGG	59.69	21	CCTGGCAGTTATGCCAAAAT	59.96	20	255	212	466	TGAGGGAAAGGGTTAAGTTGG	60.331	21	CCTGGCAGTTATGCCAAAAT	59.96	20	246	221	466	GAGGGAAAGGGTTAAGTTGGA	59.447	21	CCTGGCAGTTATGCCAAAAT	59.96	20	245	222	466
TR45855_c0_g1	TGAAGACAACGGTAACAGCG	59.904	20	TCATCGTCGTCACCAACATC	60.544	20	228	836	1063	TGAAGACAACGGTAACAGCG	59.904	20	TCATCGTCGTCACCAACATC	60.544	20	261	836	1096	TGAAGACAACGGTAACAGCG	59.904	20	TCGTCGTCACCAACATCATC	60.544	20	225	836	1060
TR57792_c0_g1	AACAGTAGTACCCCACCCCC	59.972	20	TCGCCAAATTTGTTGTGAAA	60.088	20	280	2191	2470	AACAGTAGTACCCCACCCCC	59.972	20	CGCCAAATTTGTTGTGAAAA	59.579	20	279	2191	2469	CAACAGTAGTACCCCACCCC	59.183	20	CGCCAAATTTGTTGTGAAAA	59.579	20	280	2190	2469
TR25887_c0_g1	GGTGATGCAACAACAACAGC	60.168	20	GGGAAATGTTTGGGGAAACT	60.032	20	215	111	325	GGTGATGCAACAACAACAGC	60.168	20	TGTCCTGTTCTGGAACTCCC	60.088	20	131	111	241	GGTGATGCAACAACAACAGC	60.168	20	GGGAAACTGGATATGCTGGA	59.894	20	203	111	313
TR41546_c0_g1	TTGATCTGCACTGATCTGCC	59.95	20	GGCCACACACCCACTTACAT	60.7	20	130	1339	1468	ATCTGCCATGGGATAAATGC	59.751	20	GGCCACACACCCACTTACAT	60.7	20	117	1352	1468	ATCTGCCATGGGATAAATGC	59.751	20	CTGGGGCTTTAAATGTTGCT	59.225	20	276	1352	1627
TR8996_c4_g1	GGTTATGGGAAAGCAAATGG	59.273	20	CACCTGAGGACCTACCTGGA	60.104	20	260	363	622	TGGGAAAGCAAATGGAAATG	60.807	20	CACCTGAGGACCTACCTGGA	60.104	20	255	368	622	GGTTATGGGAAAGCAAATGG	59.273	20	ACTGATCGGAGAGGCAATGT	59.685	20	241	363	603
TR51543_c1_g3	GAGCGGGATCGTAGAAAACA	60.214	20	CAGGAATGACATTGAGCGAA	59.799	20	227	390	616	CCAGGGAACATGGACTCATT	59.779	20	CAGGAATGACATTGAGCGAA	59.799	20	202	415	616	GAGCGGGATCGTAGAAAACA	60.214	20	CCTCGAGGAAATCTTCATGC	59.773	20	253	390	642
TR29819_c3_g1	GGCAGTTTGGCACATTTGTT	60.934	20	CATGCATTACAAAAACTGCCC	60.37	21	261	1525	1785	GGCAGTTTGGCACATTTGTT	60.934	20	TGCATTACAAAAACTGCCCAT	60.37	21	259	1525	1783	GCAGTTTGGCACATTTGTTT	58.677	20	CATGCATTACAAAAACTGCCC	60.37	21	260	1526	1785
TR41249_c0_g1	CATTGCAGGCAGAATGTTTG	60.257	20	AACTGACGGAAGGTTGTGCT	59.769	20	109	23	131	CAACAACTTTGGCATTGCAG	60.293	20	AACTGACGGAAGGTTGTGCT	59.769	20	121	11	131	AGGCAGAATGTTTGGACCAT	59.41	20	AACTGACGGAAGGTTGTGCT	59.769	20	103	29	131
TR40201_c0_g1	TGTAGCACTATGCAGTATTGAAATG	58.482	25	GCAAAGCAACAGCGAAAAAT	60.384	20	217	1064	1280	AGCACTATGCAGTATTGAAATGTT	57.164	24	GCAAAGCAACAGCGAAAAAT	60.384	20	214	1067	1280	GCACTATGCAGTATTGAAATGTTTT	58.752	25	GCCAATCTAAAAGGCAAAGC	58.969	20	226	1068	1293
TR22484_c0_g1	TCAGCAATGGTGGAATGAAA	60.049	20	TTTCCGGTGGAATCTCTCTG	60.187	20	274	57	330	TCTCAGCAATGGTGGAATGA	60.201	20	TTGCCTTGTGTCCATAGCTG	59.864	20	143	55	197	TCTCAGCAATGGTGGAATGA	60.201	20	TTTCCGGTGGAATCTCTCTG	60.187	20	276	55	330
TR53968_c1_g1	CGGTTAGAGACCCAGGAACA	60.103	20	GAAGACGCGACAAAAGAAGG	59.993	20	133	11	143	TTAGAGACCCAGGAACACCG	60.103	20	GAAGACGCGACAAAAGAAGG	59.993	20	130	14	143	CGGTTAGAGACCCAGGAACA	60.103	20	TGTTCGCCTTTCGAGTCTTT	59.993	20	157	11	167
TR4910_c0_g1	AAATTCAGAGCCACTCGAAA	57.546	20	GTTAAGGCGCAATTCGTTGT	60.138	20	220	2693	2912	AAATTCAGAGCCACTCGAAA	57.546	20	TTCTGGTTAAGGCGCAATTC	60.209	20	225	2693	2917	AAATTCAGAGCCACTCGAAA	57.546	20	TTAAGGCGCAATTCGTTGTT	60.619	20	219	2693	2911
TR31929_c0_g1	TGTCGATGGCTGGTCAATTA	60.073	20	AAAGTTGATTGGCACTTCCC	59.031	20	253	498	750	TGTCGATGGCTGGTCAATTA	60.073	20	AGTTGATTGGCACTTCCCC	59.918	19	251	498	748	CTCATCAATGTCGATGGCTG	60.225	20	AAAGTTGATTGGCACTTCCC	59.031	20	261	490	750
TR39113_c1_g1	CGTTTGACTACATGTTGGTGC	59.112	21	AAACTTTTTACTTTCACCCCTTGA	59.495	24	277	1146	1422	ACGTTTGACTACATGTTGGTGC	59.965	22	AAACTTTTTACTTTCACCCCTTGA	59.495	24	278	1145	1422	CGTTTGACTACATGTTGGTGC	59.112	21	AACTTTTTACTTTCACCCCTTGA	58.305	23	276	1146	1421
TR41167_c0_g1	CATGATGCTCGAGTTCTTCG	59.547	20	GCTTCGCAGAAACACTTTCC	60	20	226	307	532	CATGATGCTCGAGTTCTTCG	59.547	20	AGCTGGAGATTTCTGCTTCG	59.717	20	240	307	546	CATGATGCTCGAGTTCTTCG	59.547	20	CGCAGAAACACTTTCCTCGT	60.431	20	222	307	528
TR25854_c0_g1	TCACCTGACTGGGACAACAA	60.129	20	GAAGATGGTGGTGAGGAGGA	60.048	20	245	1747	1991	TCACCTGACTGGGACAACAA	60.129	20	ACGAAGATGGTGGTGAGGAG	60.112	20	247	1747	1993	TCACCTGACTGGGACAACAA	60.129	20	AGACGAAGATGGTGGTGAGG	60.112	20	249	1747	1995
TR56869_c0_g1	ATTTGTCCGTTATCCCCTCC	60.017	20	GCAACCGGATGTAAAAGGAA	59.938	20	271	1322	1592	TATCCCCTCCAATTCCAACA	60.126	20	GCAACCGGATGTAAAAGGAA	59.938	20	261	1332	1592	CAACAATCCAGAAACCACCC	60.21	20	GCAACCGGATGTAAAAGGAA	59.938	20	246	1347	1592
TR26068_c0_g1	GATGCATATTCCTGTGTCGC	59.108	20	TGAAAATTGCTTTTGCTGGA	59.42	20	244	1489	1732	CCCCAAATAACCGAAATTGTT	59.937	21	TGAAAATTGCTTTTGCTGGA	59.42	20	223	1510	1732	AGATGCATATTCCTGTGTCGC	60.118	21	TGAAAATTGCTTTTGCTGGA	59.42	20	245	1488	1732
TR26068_c0_g1	GATGCATATTCCTGTGTCGC	59.108	20	TGAAAATTGCTTTTGCTGGA	59.42	20	244	1489	1732	CCCCAAATAACCGAAATTGTT	59.937	21	TGAAAATTGCTTTTGCTGGA	59.42	20	223	1510	1732	AGATGCATATTCCTGTGTCGC	60.118	21	TGAAAATTGCTTTTGCTGGA	59.42	20	245	1488	1732
TR2512_c0_g1	CCCAAATGATGTCAACTTCG	58.973	20	GGGCCAGATCTCATGGAGTA	60.034	20	170	1191	1360	CCCAAATGATGTCAACTTCG	58.973	20	CCACCTAATGATAAGGGCCA	59.778	20	184	1191	1374	TCAACTTCGAACAGCAATCAA	59.454	21	GGGCCAGATCTCATGGAGTA	60.034	20	159	1202	1360
TR43454_c1_g1	TAGCTCATCACCAGATGGCA	60.376	20	GCCATATCAAAAACTGGGGA	59.762	20	203	1322	1524	GGCTCATCCCATAGCTCATC	59.616	20	GCCATATCAAAAACTGGGGA	59.762	20	214	1311	1524	ATGGCTCATCCCATAGCTCA	60.591	20	GCCATATCAAAAACTGGGGA	59.762	20	216	1309	1524
TR51587_c0_g1	ATACGCAAGATCAAGCCCAA	60.606	20	TGGTTGTTCATTACAGCAAAACTT	59.972	24	240	702	941	AATACGCAAGATCAAGCCCA	60.606	20	TGGTTGTTCATTACAGCAAAACTT	59.972	24	241	701	941	ATACGCAAGATCAAGCCCAA	60.606	20	TGGTTGTTCATTACAGCAAAACT	58.734	23	240	702	941
TR39283_c3_g4	TCCATAGTTTCGAATGGGGA	60.266	20	AACACAACAAACATCCACGC	59.47	20	270	805	1074	CAATCGGTTGCCATATTTGA	59.377	20	AACACAACAAACATCCACGC	59.47	20	243	832	1074	ACAAACAGTGTCTTTGCCGA	59.339	20	AACACAACAAACATCCACGC	59.47	20	224	851	1074
TR48082_c1_g1	GCAATGTCATGTATTGCCTGTT	59.895	22	TCGTTGAACAGACTGGGTTG	59.72	20	269	1043	1311	GCAATGTCATGTATTGCCTGTT	59.895	22	CGTTGAACAGACTGGGTTGA	59.72	20	268	1043	1310	GCAATGTCATGTATTGCCTGTT	59.895	22	TGCAAACCGTGCTCAAGTAA	60.436	20	126	1043	1168
TR48082_c1_g1	TCAACCCAGTCTGTTCAACG	59.72	20	AAACCAATGGGGTTACCCTT	59.438	20	100	1291	1390	CTTGAGCACGGTTTGCATAG	59.488	20	AAACCAATGGGGTTACCCTT	59.438	20	239	1152	1390	TTGAGCACGGTTTGCATAGT	59.347	20	AAACCAATGGGGTTACCCTT	59.438	20	238	1153	1390
TR48051_c2_g1	ACCCGAGTTGGTCTTTCTGA	59.697	20	GGTCAAGTCAGGGGTCAAGA	60.088	20	280	510	789	CCCGAGTTGGTCTTTCTGAC	59.697	20	AGACTGTATGCCCGAAGGAA	59.694	20	253	511	763	ACCCGAGTTGGTCTTTCTGA	59.697	20	AGACTGTATGCCCGAAGGAA	59.694	20	254	510	763
TR48053_c1_g1	TCTGGAGGCATGGGTTTATC	59.894	20	ATGCCGTCCAATGACGTACT	60.406	20	242	256	497	TGGAGGCATGGGTTTATCAT	60.155	20	ATGCCGTCCAATGACGTACT	60.406	20	240	258	497	TCTGGAGGCATGGGTTTATC	59.894	20	CAGAATATGCCGTCCAATGA	59.499	20	248	256	503
TR57418_c3_g1	CTGTTGCTGGCAACTGTGTT	59.946	20	ACAAGGAGGTCGCTCAAGAA	59.989	20	169	2830	2998	CTGTTGCTGGCAACTGTGTT	59.946	20	CAAGGAGGTCGCTCAAGAAG	60.126	20	168	2830	2997	GTGTTCCAGCCATCTTGTGA	59.682	20	ACAAGGAGGTCGCTCAAGAA	59.989	20	154	2845	2998
TR23731_c3_g1	GAAATTTTCTGAGGGGGAGG	59.875	20	TTTTGCGAGTACAAAATCGTT	57.528	21	228	82	309	TTTGGGGAAAACTGCATGAT	60.309	20	TTTTGCGAGTACAAAATCGTT	57.528	21	254	56	309	GAAATTTTCTGAGGGGGAGG	59.875	20	TTTTGCGAGTACAAAATCGTTTA	58.899	23	228	82	309
TR23731_c3_g1	GCCTCAGTACTCAGTGAAACCC	60.175	22	TCGATCCAGAAAGCAAATCC	60.155	20	265	432	696	AGTACACGAGTGAGTGGTGCAT	59.718	22	TCGATCCAGAAAGCAAATCC	60.155	20	211	486	696	TGGAAAGCTAGCATTAGCAGTG	59.69	22	TCGATCCAGAAAGCAAATCC	60.155	20	157	540	696
TR10553_c0_g2	TTCGCCTTAGTGCAAAAACA	59.486	20	TCTTCCTTTTTCTTTTTCTCAAGAGT	59.537	26	230	2658	2887	TCGCCTTAGTGCAAAAACAA	59.486	20	CCTTTTTCTTTTTCTCAAGAGTTTTC	59.442	26	225	2659	2883	TCGCCTTAGTGCAAAAACAA	59.486	20	TTCCTTTTTCTTTTTCTCAAGAGTTT	59.442	26	227	2659	2885
TR57358_c0_g1	TGCAACAAATTTGCTTTGGAT	60.482	21	ATGGCTGTCTGAGCCAATTC	60.226	20	280	348	627	TGCAACAAATTTGCTTTGGAT	60.482	21	GGCTGTCTGAGCCAATTCTT	59.434	20	278	348	625	TGCAACAAATTTGCTTTGGAT	60.482	21	TGGCTGTCTGAGCCAATTCT	60.945	20	279	348	626
TR4660_c0_g1	CTGTGCGTATTTGTCTGCAA	58.501	20	CAAACCTGGAACCAAATTTCA	59.825	21	235	703	937	ACTGTGCGTATTTGTCTGCAA	59.405	21	CAAACCTGGAACCAAATTTCA	59.825	21	236	702	937	CCAATCTTTTATCAGTCGGGTC	59.835	22	CAAACCTGGAACCAAATTTCA	59.825	21	151	787	937
TR29313_c1_g1	TCATGCAAGTGTGAACAGGA	58.784	20	TTAACAGTCAAGGTCGATGGG	59.978	21	254	1939	2192	TCATGCAAGTGTGAACAGGA	58.784	20	TAACAGTCAAGGTCGATGGG	58.569	20	253	1939	2191	TCATGCAAGTGTGAACAGGA	58.784	20	CAAGGTCGATGGGCATTTA	59.484	19	246	1939	2184
TR50269_c0_g2	GGCCCCACAATTATTAAAAGG	59.575	21	CTGCACATTTTTGCCATCTG	60.257	20	280	388	667	TGTTGGCCCCACAATTATTA	58.744	20	TTTGCCATCTGATCAAGGTCT	59.685	21	275	384	658	CTGTTGGCCCCACAATTATTA	59.707	21	TTTGCCATCTGATCAAGGTCT	59.685	21	276	383	658
TR51786_c3_g1	TCCAAGCTGCTTTTTGTGTG	60.027	20	CAGAAAACCGTACCGGACAT	59.853	20	242	1098	1339	AGCTGCTTTTTGTGTGGCTT	60.059	20	CAGAAAACCGTACCGGACAT	59.853	20	238	1102	1339	AAGCTGCTTTTTGTGTGGCT	60.059	20	CAGAAAACCGTACCGGACAT	59.853	20	239	1101	1339
TR46141_c0_g1	CGATTCACACCAACAACCTG	60.001	20	ATTCACTCCGACAGCAACCT	59.727	20	276	491	766	ACACAGGACCAGTTCCGTTC	60.009	20	ATTCACTCCGACAGCAACCT	59.727	20	175	592	766	CGATTCACACCAACAACCTG	60.001	20	CTCCGACAGCAACCTCTGAT	60.408	20	271	491	761
TR7152_c1_g1	GTTGGACAGAGGTTGCAGGT	60.159	20	ATCTATGAATCGTGGGCCAG	59.917	20	245	645	889	AGCCACTGGTTGAACAGTCC	60.159	20	ATCTATGAATCGTGGGCCAG	59.917	20	120	770	889	ACACTGACACTGCCAATGGA	60.162	20	ATCTATGAATCGTGGGCCAG	59.917	20	271	619	889
TR25854_c3_g1	ATGGTTGGATTGGAAGATGC	59.756	20	ATCCTCATCCGAGTCAGCAG	60.372	20	219	2124	2342	GGTTGGATTGGAAGATGCAG	60.461	20	ATCCTCATCCGAGTCAGCAG	60.372	20	217	2126	2342	GGTTGGATTGGAAGATGCAG	60.461	20	CATCATCCTCATCCGAGTCA	59.585	20	221	2126	2346
TR51786_c3_g3	TCCAAGCTGCTTTTTGTGTG	60.027	20	CAGAAAACCGTACCGGACAT	59.853	20	242	1098	1339	AGCTGCTTTTTGTGTGGCTT	60.059	20	CAGAAAACCGTACCGGACAT	59.853	20	238	1102	1339	AAGCTGCTTTTTGTGTGGCT	60.059	20	CAGAAAACCGTACCGGACAT	59.853	20	239	1101	1339
TR3293_c0_g1	CAAAAACCAGCACTGAAGTGAA	60.318	22	TCTTTTTCTTAGGCTCCGCA	60.089	20	102	18	119	CAAAAACCAGCACTGAAGTGAA	60.318	22	CCGTTGCATATTCCAAGTCA	59.542	20	267	18	284	GGTTACAAAAACCAGCACTGAA	59.177	22	TCTTTTTCTTAGGCTCCGCA	60.089	20	107	13	119
TR38310_c1_g3	TGTGAAACAAACTCTCGAAACAA	59.815	23	TACGCTAGGCATTCAGCCTT	60.003	20	121	532	652	TGTGAAACAAACTCTCGAAACAA	59.815	23	GTAGGGCCTAAACAAAGGGC	59.966	20	269	532	800	TGTGAAACAAACTCTCGAAACA	58.458	22	TACGCTAGGCATTCAGCCTT	60.003	20	121	532	652
TR38310_c1_g3	TGCCAGTCATTGAAAGCAGT	59.445	20	AGTGTTTGGTGGCAATGTGA	60.008	20	279	5108	5386	CCACCGCGTATCACACTAAA	59.609	20	TCGACCTCAGAAGAAGAGGC	59.679	20	167	5036	5202	ATCACTTCACCACCGCGTAT	60.406	20	TCGACCTCAGAAGAAGAGGC	59.679	20	176	5027	5202
TR30489_c0_g1	AATCATCTTTCTCATGCGCC	60.185	20	TCTGCTGTGAGTGAAGCTCAG	59.503	21	172	729	900	CATCTTTCTCATGCGCCATA	59.792	20	TCTGCTGTGAGTGAAGCTCAG	59.503	21	169	732	900	AGTGAACGGAGCCAACAAGT	59.769	20	TCTGCTGTGAGTGAAGCTCAG	59.503	21	256	645	900
TR17284_c0_g2	GGACCGAATAATGGTAATGAGC	59.706	22	CCCACCCACCATACACTGTT	60.545	20	278	1206	1483	CCGAATAATGGTAATGAGCTTTG	59.878	23	ACACCCACCCACCATACACT	60.009	20	278	1209	1486	CTTGCTGGACCGAATAATGG	60.46	20	CCCACCATACACTGTTACCAA	58.269	21	280	1200	1479
TR55460_c0_g1	CAGCATTTGCAAAACAACTCC	60.663	21	AGATTCTGGACTGTGGGTGC	60.12	20	241	480	720	CAGCATTTGCAAAACAACTCC	60.663	21	CCTAACGCCAATGATGTCAA	59.542	20	222	480	701	CAGCATTTGCAAAACAACTCC	60.663	21	TAACGCCAATGATGTCAAGG	59.542	20	220	480	699
TR9016_c1_g1	CAAACAAAACAACTTGGGCA	59.603	20	TTTCACTCCACAGGTACCCC	59.82	20	248	479	726	CAAACAAAACAACTTGGGCA	59.603	20	CACAGGTACCCCTGGATGAC	60.238	20	240	479	718	CAAACAAAACAACTTGGGCA	59.603	20	AGGTACCCCTGGATGACTGA	59.38	20	237	479	715
TR31919_c0_g1	GTGGTGGCATCACACTTTGT	59.446	20	ATGGTGGTGGGTTTTGATTG	60.474	20	278	89	366	GTGGTGGCATCACACTTTGT	59.446	20	GATGGTGGTGGGTTTTGATT	59.508	20	279	89	367	GTGGTGGCATCACACTTTGT	59.446	20	GCGTTACCATTCATTTGTGC	59.044	20	168	89	256
TR9334_c4_g1	TTCTGTCCTAGCCAGCCATT	59.836	20	GGTGCCATAAATCGAGAAGC	59.674	20	170	165	334	GTAATGGACATGCGGTTCCT	59.82	20	GGTGCCATAAATCGAGAAGC	59.674	20	189	146	334	ATGCGGTTCCTTCTGTCCTA	59.694	20	GGTGCCATAAATCGAGAAGC	59.674	20	180	155	334
TR31077_c0_g2	TGATCATGGATTCACAGCGT	60.08	20	GAACTGACACCAGCTGAGCA	60.187	20	169	870	1038	CGCAGGAAGTTCTCGATCTC	60.096	20	GAACTGACACCAGCTGAGCA	60.187	20	128	911	1038	TGATCATGGATTCACAGCGT	60.08	20	AGCTGCTGGAAGAGCCTATG	59.74	20	143	870	1012
TR48103_c9_g2	CTGCAAACATCCATCCATTG	59.924	20	AACAGCCCATGGAACAAGAC	59.973	20	218	535	752	CTGCAAACATCCATCCATTG	59.924	20	AGAACAGCCCATGGAACAAG	60.111	20	220	535	754	TGCAAACATCCATCCATTGT	59.781	20	AACAGCCCATGGAACAAGAC	59.973	20	217	536	752
TR20270_c0_g1	ATGGGAAGCTCAGGTTTTGA	59.67	20	TTTTTAACTCGGTGTTGACAGG	59.174	22	189	673	861	TGGGAAGCTCAGGTTTTGAG	60.366	20	TTTTTAACTCGGTGTTGACAGG	59.174	22	188	674	861	GGGAAGCTCAGGTTTTGAGA	59.405	20	TTTTTAACTCGGTGTTGACAGG	59.174	22	187	675	861
TR23748_c0_g1	TACAGTGTCTAAAGCGCCCC	60.27	20	GCACAGAAGATACCGGTGGT	59.997	20	260	1055	1314	GAGGCGTATGAAGACCCAGA	60.218	20	CAGGTATGGAAGGCAAAGGA	60.066	20	208	1032	1239	TACAGTGTCTAAAGCGCCCC	60.27	20	CAGGTATGGAAGGCAAAGGA	60.066	20	185	1055	1239
TR40992_c0_g1	TTTTTGGAGTAGACCCAGACC	58.161	21	CATCACTGATCACCGATTTTG	58.987	21	158	173	330	TTTTTGGAGTAGACCCAGACCT	59.144	22	CATCACTGATCACCGATTTTG	58.987	21	158	173	330	TGAAGTGTAGATGTGGGTGACA	59.06	22	CATCACTGATCACCGATTTTG	58.987	21	208	123	330
TR40992_c0_g1	CCAATTAGAACTTTGGGTGAGTG	59.914	23	TGCGGAAAATACTCATTGCC	60.971	20	271	801	1071	CCAATTAGAACTTTGGGTGAGTG	59.914	23	GCGGAAAATACTCATTGCCA	60.971	20	270	801	1070	CCAATTAGAACTTTGGGTGAGTG	59.914	23	TTTGCGGAAAATACTCATTGC	60.089	21	273	801	1073
TR18837_c0_g2	GCTGGGCATCACTGGTAAAT	59.962	20	GCTGCAAGCGTCTATCTTCA	59.326	20	278	343	620	GCTGGGCATCACTGGTAAAT	59.962	20	TGCTGCAAGCGTCTATCTTC	59.326	20	279	343	621	TGGGCATCACTGGTAAATCA	59.924	20	GCTGCAAGCGTCTATCTTCA	59.326	20	276	345	620
TR27545_c0_g1	GGAACTAAGAAATGCAGACATGG	60.014	23	AATTTGTTGCCGAATTCATTG	59.824	21	100	1	100	GGAACTAAGAAATGCAGACATGG	60.014	23	TGGCTAAAATCCTAGTGGGTG	59.098	21	217	1	217	GGAACTAAGAAATGCAGACATGG	60.014	23	TGGCTAAAATCCTAGTGGGTGT	59.892	22	217	1	217
TR3290_c0_g1	CGGAGTTGTCTTCTCCTTGC	59.989	20	AAAACCGGTCATGAAAGACG	59.971	20	152	2273	2424	GTCGGCATCTTCCTCATCAT	60.042	20	AAAACCGGTCATGAAAGACG	59.971	20	250	2175	2424	CGGAGTTGTCTTCTCCTTGC	59.989	20	AAAACAGCATGATGCCACAA	60.119	20	275	2273	2547
TR36242_c0_g1	CGAAAATCGGCAAATGTTTT	59.943	20	CAAAGCAAGTTTCAATGGCA	59.849	20	123	899	1021	TTGCCGTGTCAGGTGATTTA	60.111	20	CAAAGCAAGTTTCAATGGCA	59.849	20	104	918	1021	AACCAACACAGCTTTTTCCG	60.147	20	CAAAGCAAGTTTCAATGGCA	59.849	20	229	793	1021
TR57308_c0_g1	CATGGCATTATCATTATTTCATTCTT	59.564	26	AACCTAGAAAACATGCAGCCA	59.761	21	156	3127	3282	CATGGCATTATCATTATTTCATTC	57.521	24	AACCTAGAAAACATGCAGCCA	59.761	21	156	3127	3282	AACATGGCATTATCATTATTTCATTC	59.454	26	AACCTAGAAAACATGCAGCCA	59.761	21	158	3125	3282
TR30146_c0_g1	ACCAGCAAACTCACATCCAA	59.139	20	TGCATTTTTATTTGCCAGTCC	59.957	21	249	504	752	ACCAGCAAACTCACATCCAA	59.139	20	CATTTTTATTTGCCAGTCCGA	59.95	21	247	504	750	ACAGGCGGTGCACATTTATT	60.395	20	TTTATTTGCCAGTCCGATTGT	59.465	21	278	469	746
TR56764_c0_g1	ATCAAAGAAACATGCCCCAC	59.797	20	ACTTCAGGATGTCCGTGACC	59.969	20	225	2321	2545	TGTCTGGGCAACAATCAAAG	59.691	20	ACTTCAGGATGTCCGTGACC	59.969	20	238	2308	2545	CAATCAAAGAAACATGCCCC	60.309	20	ACTTCAGGATGTCCGTGACC	59.969	20	227	2319	2545
TR45819_c0_g1	CAATCTTTTGACAGGAAGCG	58.501	20	ACCATTGTAGCCAATTCCCA	60.192	20	263	21	283	CAATCTTTTGACAGGAAGCG	58.501	20	CCATTGTAGCCAATTCCCAC	60.192	20	262	21	282	CAATCTTTTGACAGGAAGCG	58.501	20	AACAATGCAAGCTCCAACCT	59.74	20	224	21	244
TR26032_c0_g2	TGAGATGTGACCTAAAGCGG	58.874	20	ACCGTAACTGTGGGGACTCA	60.422	20	276	3602	3877	GTGAGATGTGACCTAAAGCGG	59.749	21	ACCGTAACTGTGGGGACTCA	60.422	20	277	3601	3877	TGAGATGTGACCTAAAGCGGT	59.749	21	ACCGTAACTGTGGGGACTCA	60.422	20	276	3602	3877
TR48493_c0_g1	AGCATGCAAGAACCGTTTG	59.856	19	ATGCTTTGGTGACCTTGACC	59.973	20	135	160	294	AGCATGCAAGAACCGTTTG	59.856	19	ATGCAATCAAAAGGAGCAGG	60.214	20	208	160	367	AGCATGCAAGAACCGTTTG	59.856	19	GCTTTGGTGACCTTGACCTC	59.703	20	133	160	292
TR42533_c0_g2	TTCGTATGTTCCTCCAAGCC	60.074	20	TCCTGGTTTTGTAGCGTTTTG	60.152	21	114	1469	1582	CAAGCCAAAATGTAGTCGCA	59.872	20	TCCTGGTTTTGTAGCGTTTTG	60.152	21	100	1483	1582	GGCCTTGTTTAACTGGTTGC	59.615	20	TCCTGGTTTTGTAGCGTTTTG	60.152	21	275	1308	1582
TR25123_c0_g1	TGTGTGGTGATTGCTTTGAA	58.675	20	ATTTCAGCCAATCAAATGCC	59.907	20	157	1236	1392	TGTGTGGTGATTGCTTTGAA	58.675	20	AACCAGTCTCAAACCGCAAG	60.291	20	209	1236	1444	TGTGTGGTGATTGCTTTGAA	58.675	20	CTGAACACCATTTCAGCCAA	59.691	20	166	1236	1401
TR28779_c0_g2	AAATTCCCCATTTGGCCTAC	60.02	20	CCTTAGCACACGGCTTTACA	58.989	20	125	663	787	CTTTTGTTGTCCGCCATTTT	59.975	20	CCTTAGCACACGGCTTTACA	58.989	20	102	686	787	AAATTCCCCATTTGGCCTAC	60.02	20	ATTCCTTAGCACACGGCTTT	58.861	20	128	663	790
TR25513_c0_g2	TGTTTATAGGGATGCTTTTTAGCAG	60.054	25	TTGCACTTTGCAACAAATGG	60.677	20	125	661	785	TTTTCAAAATGTTTATAGGGATGC	58.556	24	TTGCACTTTGCAACAAATGG	60.677	20	134	652	785	TTCAAAATGTTTATAGGGATGCTTT	59.378	25	TTGCACTTTGCAACAAATGG	60.677	20	132	654	785
TR25513_c0_g2	TGCAGTACCCTGGTTGTTGA	60.152	20	AAGCCCACTATGGCTCTTGA	59.836	20	272	1152	1423	TGCAGTACCCTGGTTGTTGA	60.152	20	AGCCCACTATGGCTCTTGAA	59.836	20	271	1152	1422	TTCCCACAGTGCAGTACCCT	60.567	20	AGCCCACTATGGCTCTTGAA	59.836	20	280	1143	1422
TR31617_c0_g1	AGGTCAGCAGTGAATCTGCAT	59.889	21	GCAAAATTTCATACCATCACCA	59.704	22	146	224	369	GGTCAGCAGTGAATCTGCAT	58.832	20	GCAAAATTTCATACCATCACCA	59.704	22	145	225	369	TGCATAAAGAGAGGTGTTGCC	60.264	21	GCAAAATTTCATACCATCACCA	59.704	22	130	240	369
TR29340_c0_g2	CCTCAACACGACCCTCATCT	60.112	20	CCTTGGAGTCAGGACTCAGC	59.986	20	264	1018	1281	CCTCAACACGACCCTCATCT	60.112	20	TCTGTCTGCACTGTCCTTGG	60.022	20	278	1018	1295	CCTCAACACGACCCTCATCT	60.112	20	CTGCACTGTCCTTGGAGTCA	60.022	20	273	1018	1290
TR44871_c3_g1	GCGCCTTCATACAAGATGCT	60.382	20	AGTTTTGGACTTGTGCTCCG	60.291	20	249	1939	2187	GCGCCTTCATACAAGATGCT	60.382	20	CGGACAAAATTGTTTCGGAC	60.344	20	231	1939	2169	GCGCCTTCATACAAGATGCT	60.382	20	GGACAAAATTGTTTCGGACG	60.344	20	230	1939	2168
TR39320_c2_g1	AGTTTTCAGAAGTGCCGGAG	59.473	20	CGCATTTATCGAGGGAGTGT	60.096	20	211	461	671	AGTTTTCAGAAGTGCCGGAG	59.473	20	CATCGCATTTATCGAGGGAG	60.564	20	214	461	674	TTAGTTTTCAGAAGTGCCGGA	59.869	21	CGCATTTATCGAGGGAGTGT	60.096	20	213	459	671
TR7277_c1_g1	AAGCAAATTCCTGCACCACT	59.74	20	TTGTTGTTTTTGTTGTTGTCGAT	59.455	23	147	2353	2499	AAGCAAATTCCTGCACCACT	59.74	20	TTGTTGTTTTTGTTGTTGTCG	57.246	21	147	2353	2499	CCACTGGTGACATTGAGGAA	59.52	20	TTGTTGTTTTTGTTGTTGTCGAT	59.455	23	132	2368	2499
TR39259_c0_g1	AACAGCTCTGGTGGTTTTGG	60.149	20	GTGACCACCCTCTCCACACT	60.006	20	264	3534	3797	AGCCGGAGGAGGAAGTAAAG	59.842	20	GTGACCACCCTCTCCACACT	60.006	20	214	3584	3797	GGCGAATCAGGACACTTCTC	59.81	20	GTGACCACCCTCTCCACACT	60.006	20	180	3618	3797
TR1862_c0_g1	CACCAACCAAGAACCCTTGT	59.861	20	CTCCTAACCATGCACCACCT	59.989	20	133	235	367	CACCAACCAAGAACCCTTGT	59.861	20	AGAAGCTAAGAGCCTTGGGC	60.117	20	157	235	391	CACCAACCAAGAACCCTTGT	59.861	20	AACATTTGTTTTCAAGCCGC	60.117	20	213	235	447
TR58062_c0_g1	TGATCGCCTAAGAGGAGAGG	59.526	20	ATGGTGTCAAAGAACGAGCC	60.119	20	127	304	430	TGATCGCCTAAGAGGAGAGG	59.526	20	TCAAAGAACGAGCCAATGTG	59.84	20	121	304	424	TGATCGCCTAAGAGGAGAGG	59.526	20	TGTCAAAGAACGAGCCAATG	59.84	20	123	304	426
TR17531_c1_g2	TGCAATCAACACGATCACCT	60.12	20	CAAGTGGCTTTGCTCATTCA	59.988	20	143	808	950	CCTCACACAGCCAAACAGAA	59.873	20	CAAGTGGCTTTGCTCATTCA	59.988	20	126	825	950	TAAATTGCGCATGACAGGAA	60.215	20	CAAGTGGCTTTGCTCATTCA	59.988	20	172	779	950
TR58330_c0_g1	TACGTTTTTCCAACCAAGCC	59.975	20	TCTTTTTCAAGTTCTCAACTTCTTTC	58.774	26	117	1087	1203	TACGTTTTTCCAACCAAGCC	59.975	20	TCTTTTTCAAGTTCTCAACTTCTTTCT	59.582	27	117	1087	1203	TACGTTTTTCCAACCAAGCC	59.975	20	TTTTTCAAGTTCTCAACTTCTTTCTTT	59.486	27	115	1087	1201
TR15152_c0_g1	ACATGGCCAACACTTTGGTT	60.277	20	ATGTTGCGTTTAGTGCGTTG	59.799	20	210	698	907	ACATGGCCAACACTTTGGTT	60.277	20	GTTGCGTTTAGTGCGTTGTG	60.36	20	208	698	905	ACATGGCCAACACTTTGGTT	60.277	20	TGTTGCGTTTAGTGCGTTGT	60.36	20	209	698	906
TR57357_c1_g1	CAACAGCTGAGGGGTAGAGC	60.012	20	CGAATTCGTCTCCCAAGTTC	59.67	20	232	80	311	CAACAGCTGAGGGGTAGAGC	60.012	20	TCGAATTCGTCTCCCAAGTT	59.67	20	233	80	312	GCACAGTTGGAGCATTTGAA	59.847	20	TTTGGTAATTCTGGGGTTGC	59.801	20	236	155	390
TR44839_c0_g2	TTGAATTTTGGTTCATGCCA	59.907	20	GAAAGAGGGGCAAATTGACA	60.051	20	191	297	487	TGCAAAGACCCTTTACGGTT	59.609	20	GAAAGAGGGGCAAATTGACA	60.051	20	118	370	487	TTGAATTTTGGTTCATGCCA	59.907	20	GGGGCAAATTGACAACAGTC	60.362	20	185	297	481
TR39180_c0_g1	AATTGCACTCTCCATGGTCC	59.934	20	AAGCTCTCCAAAGAGGGAGG	59.95	20	279	681	959	AATTGCACTCTCCATGGTCC	59.934	20	GAGGGAGCACGATCTTTCAG	59.95	20	199	681	879	AATTGCACTCTCCATGGTCC	59.934	20	AGAGGGAGCACGATCTTTCA	59.95	20	200	681	880
TR18370_c0_g1	AGCATTTGTGATTTGGTCCC	59.797	20	TCTATGTCGGTTCGCACTCA	60.413	20	234	717	950	AGCATTTGTGATTTGGTCCC	59.797	20	CGCACTCATTCACATCCAGA	60.84	20	222	717	938	AGCATTTGTGATTTGGTCCC	59.797	20	TCGCACTCATTCACATCCAG	60.84	20	223	717	939
TR10619_c0_g1	CAAATTCAACACTGCAAGCC	59.322	20	TCCCACCTTGATTGTTTTCC	59.767	20	225	2271	2495	CAAATTCAACACTGCAAGCC	59.322	20	GGCATTTTATCCCACCTTGA	59.762	20	234	2271	2504	ACAAATTCAACACTGCAAGCC	60.169	21	TCCCACCTTGATTGTTTTCC	59.767	20	226	2270	2495
TR48251_c0_g1	AAACAGCATATCTGTCCCCG	59.955	20	CATGCGAGTATTCCACAATGA	59.557	21	191	992	1182	AAACAGCATATCTGTCCCCG	59.955	20	TCATGCGAGTATTCCACAATG	59.557	21	192	992	1183	AAACAGCATATCTGTCCCCG	59.955	20	CAACAAAAGTTGAGTCATGCG	59.376	21	206	992	1197
TR55722_c0_g1	AAATGCCAGAGTACACCACACT	58.653	22	TGTTCATTTTTCCCACACACA	59.849	21	270	410	679	AAATGCCAGAGTACACCACACT	58.653	22	TCCAAATGTTCATTTTTCCCA	60.153	21	276	410	685	AAATGCCAGAGTACACCACAC	57.587	21	TGTTCATTTTTCCCACACACA	59.849	21	270	410	679
TR57091_c0_g1	GGGGGAAACACGAACATTAC	59.15	20	TCACAGTTTGGTTTATCACAGTTTC	59.505	25	242	6862	7103	GGGGGAAACACGAACATTAC	59.15	20	TTTGGTTTATCACAGTTTCTGTCAC	59.505	25	236	6862	7097	AAAAATTTGGGGGAAACACG	60.911	20	TCACAGTTTGGTTTATCACAGTTTC	59.505	25	250	6854	7103
TR38532_c1_g1	TTGTGGGTTGCCTATGTTGA	59.964	20	GGGCATATGTGTTGTCCAAA	59.251	20	141	1243	1383	TGTGGGTTGCCTATGTTGAA	59.964	20	GGGCATATGTGTTGTCCAAA	59.251	20	140	1244	1383	TTGTGGGTTGCCTATGTTGA	59.964	20	TACCGGGGCATATGTGTTGT	61.032	20	146	1243	1388
TR14498_c0_g1	CAGGAAGCAGTAAATGTGGAA	57.893	21	TGTTTACATGATTGTGTTGTGTTTG	59.757	25	255	814	1068	GGAAGCAGTAAATGTGGAACTG	58.767	22	TGTTTACATGATTGTGTTGTGTTTG	59.757	25	253	816	1068	ACAGGAAGCAGTAAATGTGGAA	58.767	22	TGTTTACATGATTGTGTTGTGTTTG	59.757	25	256	813	1068
TR24376_c1_g1	CCGTCTTCAACTTCCGCTAC	59.875	20	CGGTGATGAGTGAACTGTGG	60.154	20	267	336	602	ACCGTCTTCAACTTCCGCTA	59.875	20	CGGTGATGAGTGAACTGTGG	60.154	20	268	335	602	CACTTTCACAACAACGACGG	60.19	20	AGCTAATGACGTGTGCGATG	59.895	20	235	419	653
TR9719_c0_g1	GCAGCAACTGCTCCAAAAGT	60.581	20	AGCACTGGGCTTAATGCTGT	59.904	20	154	44	197	AGCAGCAACTGCTCCAAAAG	60.71	20	AGCACTGGGCTTAATGCTGT	59.904	20	155	43	197	TTGGGATATGAAGTGGTGGC	60.723	20	AGCACTGGGCTTAATGCTGT	59.904	20	117	81	197
TR9719_c0_g1	TTGTCCACAAGGAACAGCAG	59.873	20	AGACTTGCAACAGAAACAAATG	57.096	22	199	1351	1549	GGTTTGGTTCATGGATTGCT	59.797	20	AGACTTGCAACAGAAACAAATG	57.096	22	272	1278	1549	TCCACAAGGAACAGCAGTGA	60.44	20	AGACTTGCAACAGAAACAAATG	57.096	22	196	1354	1549
TR25883_c0_g1	ACATAGCCAACACCTCCGTC	59.997	20	AAGGCAAAAGTTCCAGCAGA	59.993	20	208	2169	2376	ACATAGCCAACACCTCCGTC	59.997	20	AGGCAAAAGTTCCAGCAGAA	59.993	20	207	2169	2375	GTCGTCATCATCATTGGCTG	60.08	20	GTTACCGTGACGAAATGGCT	60	20	263	2201	2463
TR47982_c0_g1	TGCAATGCAGCACTCTAATG	58.602	20	GCAGAAAAGAAGTGCCATGA	59.002	20	275	173	447	TGCAATGCAGCACTCTAATGA	60.56	21	GCAGAAAAGAAGTGCCATGA	59.002	20	275	173	447	TGCAATGCAGCACTCTAATG	58.602	20	GCAGAAAAGAAGTGCCATGAA	60.38	21	275	173	447
TR38261_c0_g1	CTGTCGGGTGAAAACCCTT	59.951	19	TGTTGCGTAGGTCCTTCTTG	58.923	20	182	1970	2151	ATCCTAACACCGGGTGAGTC	58.868	20	TGTTGCGTAGGTCCTTCTTG	58.923	20	203	1949	2151	CTGTCGGGTGAAAACCCTTT	61.264	20	TGTTGCGTAGGTCCTTCTTG	58.923	20	182	1970	2151
TR17829_c0_g1	TGGCAACAGTCTTTCAATGC	59.847	20	CAACTTCAACAGGAAAAAGGC	58.869	21	254	387	640	TGGCAACAGTCTTTCAATGC	59.847	20	CAACTTCAACAGGAAAAAGGCT	59.799	22	254	387	640	TGGCAACAGTCTTTCAATGC	59.847	20	ACAACTTCAACAGGAAAAAGGC	59.674	22	255	387	641
TR50191_c0_g1	GCCGGTGAACAAGTAATGCT	60.14	20	CATGCACACACATTTACGCA	60.185	20	260	788	1047	AGCCGGTGAACAAGTAATGC	60.14	20	CATGCACACACATTTACGCA	60.185	20	261	787	1047	GCCGGTGAACAAGTAATGCT	60.14	20	CACACACATTTACGCACACG	59.66	20	256	788	1043
TR14837_c0_g1	CCAGAAACCTGTATTTTCACTCG	60.042	23	GGGAGCCATCCGAGTTTTAC	60.826	20	278	1494	1771	GAAACCTGTATTTTCACTCGTGG	59.92	23	GGGAGCCATCCGAGTTTTAC	60.826	20	275	1497	1771	CCAGAAACCTGTATTTTCACTCG	60.042	23	GGGAGCCATCCGAGTTTTA	60.021	19	278	1494	1771
TR30593_c0_g1	TGTACTGGCTTTTACACGCA	58.006	20	TGAACATATTTACGCCTCTTTCAA	60.025	24	226	1398	1623	GTGTACTGGCTTTTACACGCA	58.909	21	TGAACATATTTACGCCTCTTTCAA	60.025	24	227	1397	1623	TGTACTGGCTTTTACACGCA	58.006	20	TGAACATATTTACGCCTCTTTCA	58.818	23	226	1398	1623
TR21353_c1_g3	ACGAGAGAAACCACACACCC	60.009	20	TCTTTTCACCTTGTTTATGGCA	59.625	22	279	814	1092	AACCACACACCCCTCAAAAG	59.861	20	TCTTTTCACCTTGTTTATGGCA	59.625	22	271	822	1092	AAACCACACACCCCTCAAAA	60.246	20	TCTTTTCACCTTGTTTATGGCA	59.625	22	272	821	1092
TR291_c0_g1	TCCCGCACAAGTCAACATAA	60.111	20	CGCAAGTTGTTTGAGAGTTG	57.122	20	273	272	544	TCCCGCACAAGTCAACATAA	60.111	20	ACGCAAGTTGTTTGAGAGTTG	58.078	21	274	272	545	AATCCCGCACAAGTCAACAT	60.384	20	CGCAAGTTGTTTGAGAGTTG	57.122	20	275	270	544
TR58238_c0_g1	GCATTGGCCACAATTTCTTT	59.945	20	GCCTAAGCGCTAACAAGTGG	60.039	20	225	2790	3014	ATTGGCCACAATTTCTTTCG	59.938	20	GCCTAAGCGCTAACAAGTGG	60.039	20	223	2792	3014	CATTCTTCGCGGATTCTTTC	59.784	20	GCCTAAGCGCTAACAAGTGG	60.039	20	257	2758	3014
TR7249_c5_g1	CCATCTCTCTAGCAGTGGGC	59.973	20	ATGGTGATGTGAGGACGACA	59.962	20	276	3740	4015	CCATCTCTCTAGCAGTGGGC	59.973	20	GTGATGGTGATGTGAGGACG	59.962	20	279	3740	4018	AGCTGAGCTGTCGCCATATT	60.007	20	TGAGGAAGAAGAAAAAGCCG	59.564	20	251	3648	3898
TR41268_c1_g1	CCAGTTGTTGCACAGTCACC	60.203	20	TTCCAGGCAGCTAGGAAGAG	59.711	20	189	19	207	CCAGTTGTTGCACAGTCACC	60.203	20	TCAAGGCCATGGAAATTTGT	60.309	20	134	19	152	CCAGTTGTTGCACAGTCACC	60.203	20	GTTCCAGGCAGCTAGGAAGA	59.574	20	190	19	208
[truncated: 800 more rows]
